# Supplementary material for: Integrating transcriptomic and proteomic data for accurate assembly and annotation of genomes
Source: PubMed Central journal article supplement — Genome Res. 2017 Jan;27(1):133–44. doi: 10.1101/gr.201368.115 (PMC5204337; doi:10.1101/gr.201368.115), 2017-01

# **Supplemental Information**

# Supplemental Information Figure A

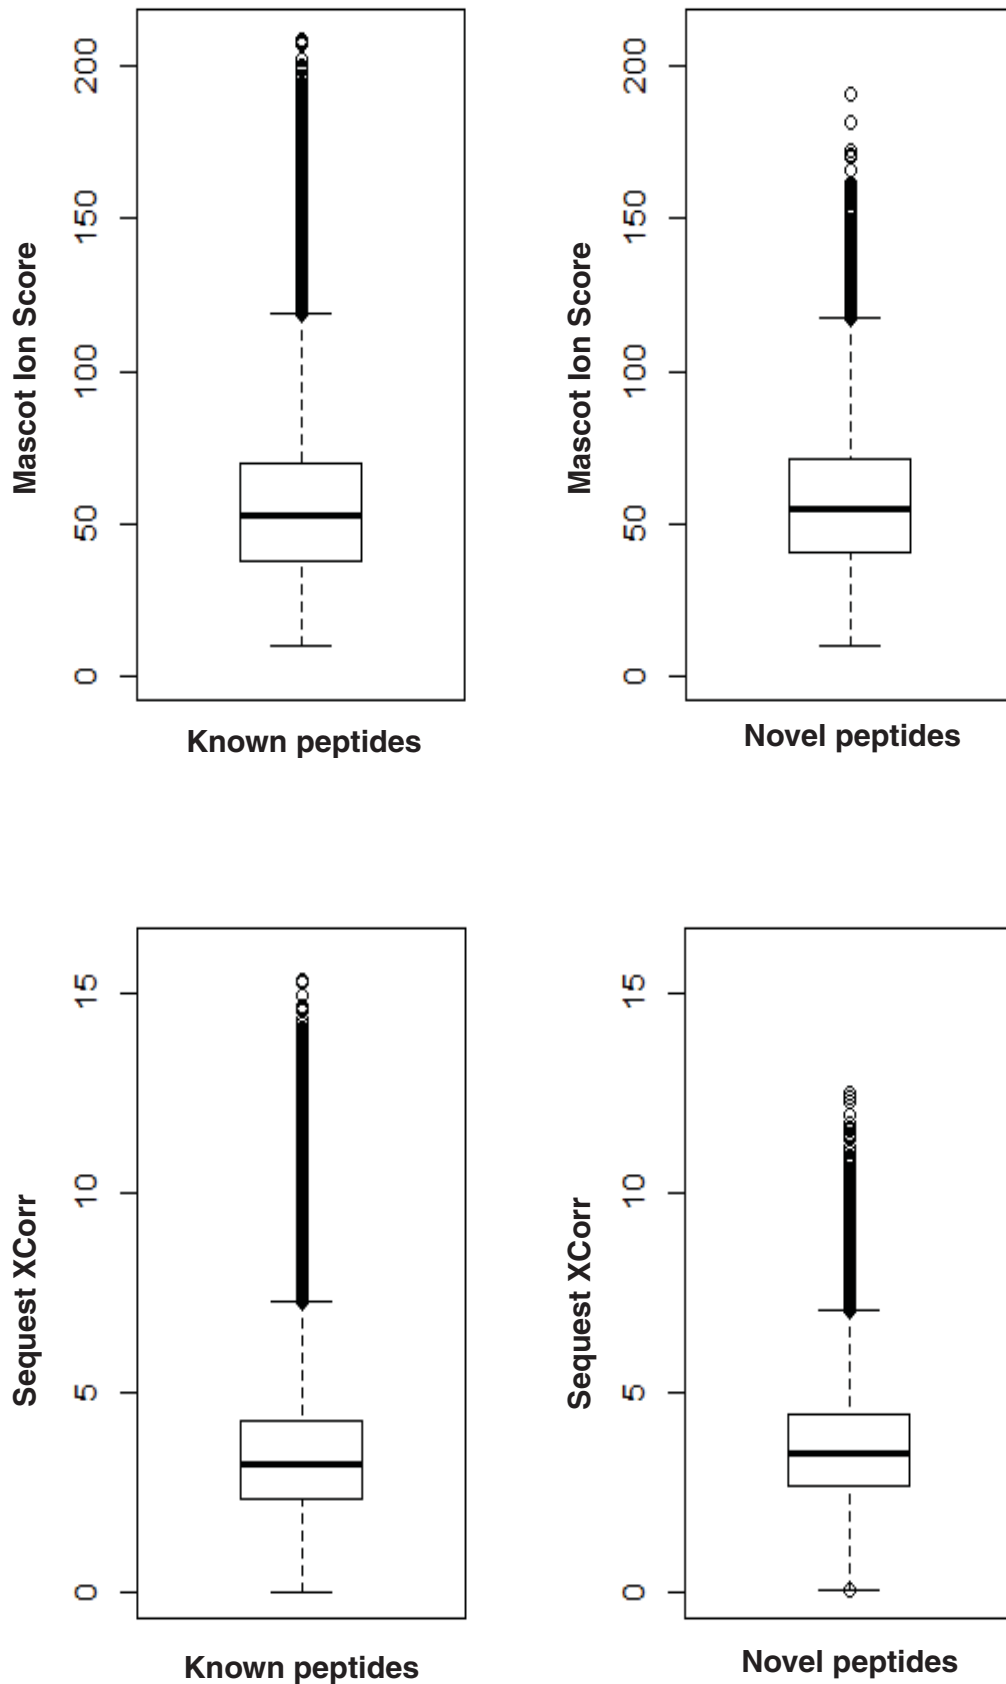

**Supplemental Information Figure A. Distribution of mascot (ion score) and Sequest (XCorr) scores for known and novel peptides.** The mean sequest and mascot scores for known and novel peptides were calculated and were found to be similar for known and novel peptides.

## Supplemental Information Figure B

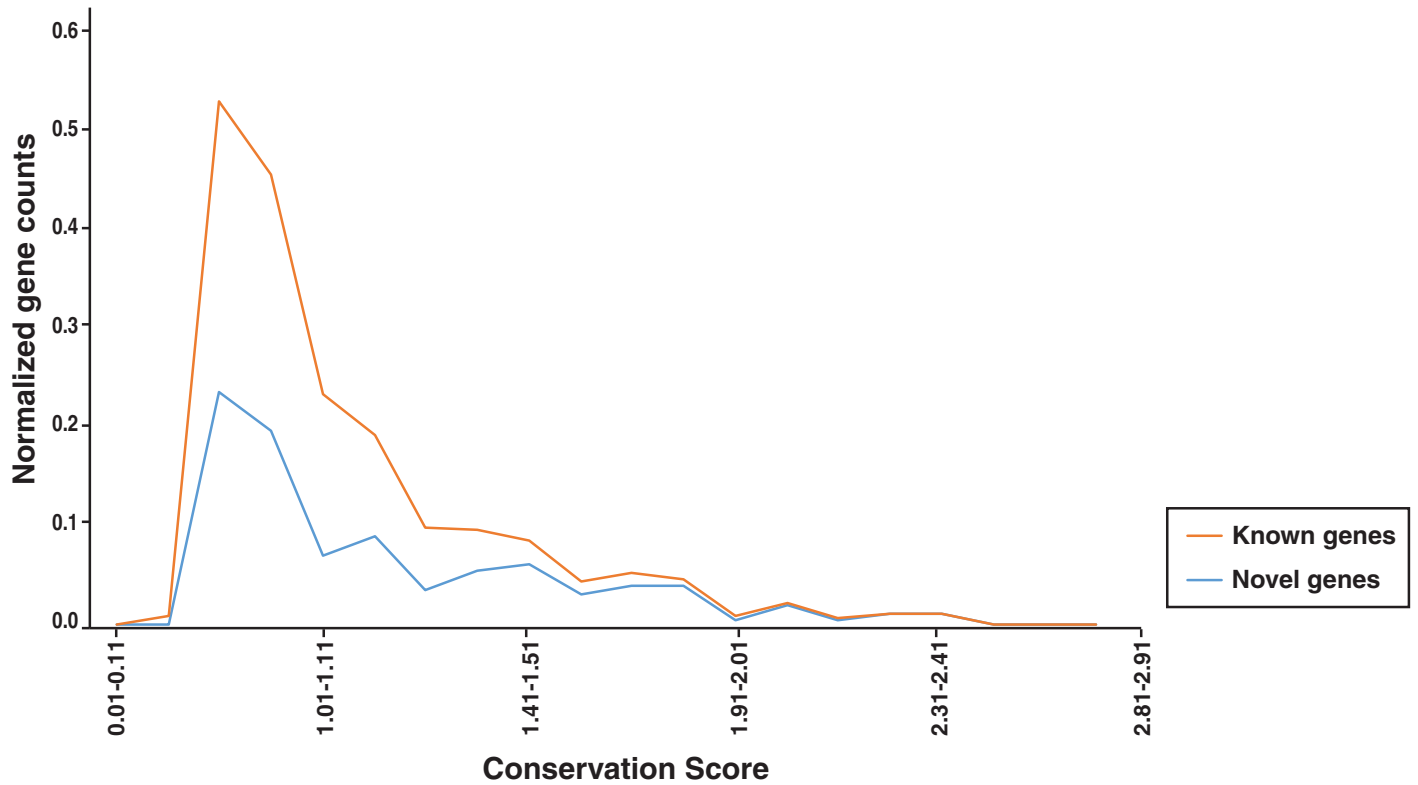

**Supplemental Information Figure B. Conservation analysis of known and novel genes.** Evolutionary rates were calculated from OrthoDB database and were found to be similar for both known and novel genes .

## Supplemental Information Figure C

### Distribution of ORF length

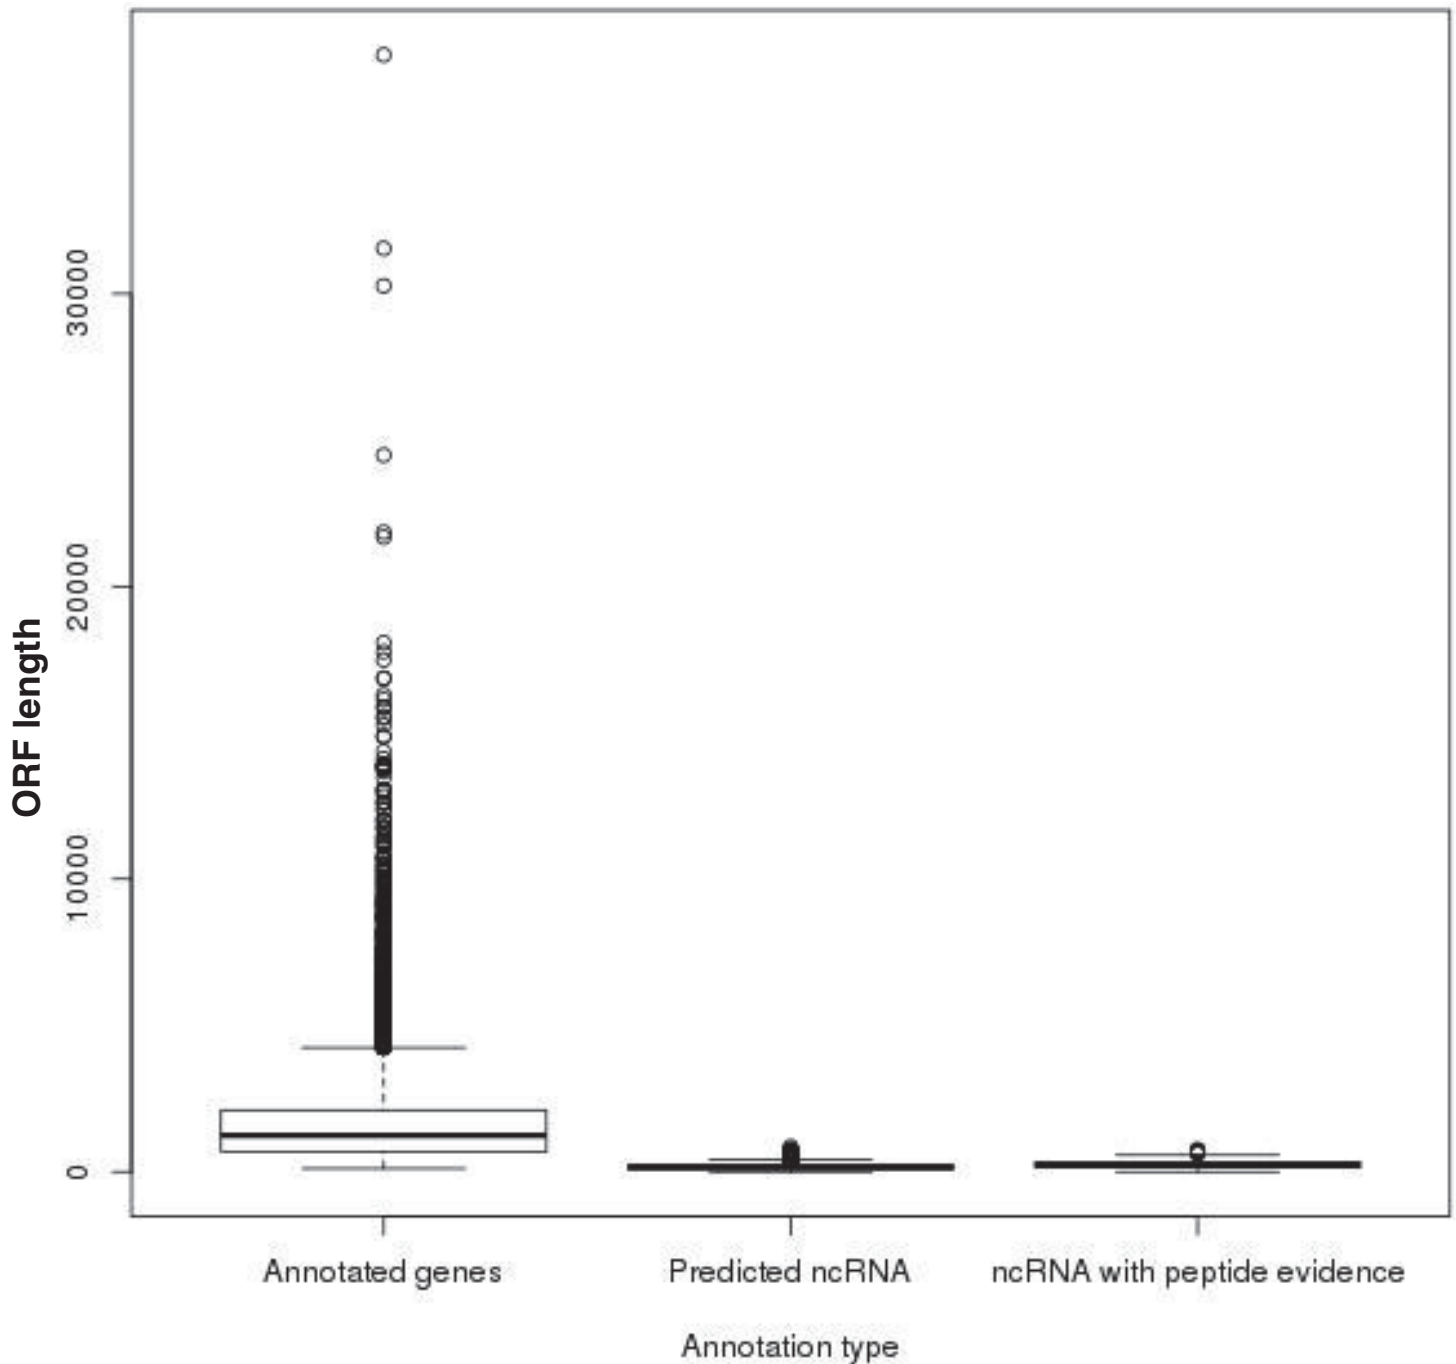

**Supplemental Information Figure C. Distribution of ORF length in annotated genes, predicted non-coding RNAs and non-coding RNAs with peptide evidence from proteomic data.** The median length of reading frames for annotated genes and non-coding RNAs was found to be ~1,240 bp and ~153 bp, respectively. The median length of reading frames for non-coding RNAs, which were found to have peptide evidence from proteomic data was ~225 bp.

## Supplemental Information Figure D

i.

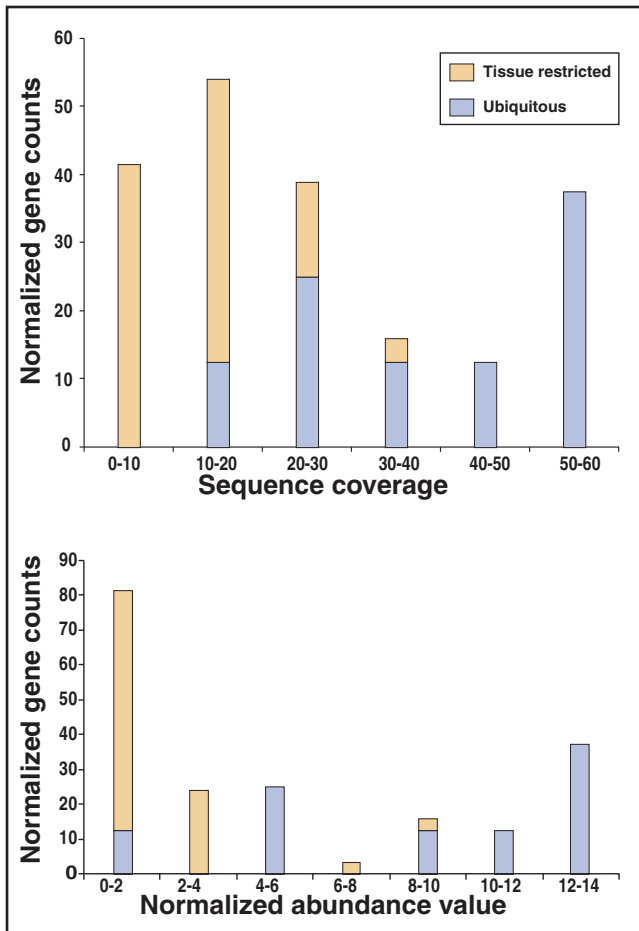

ii.

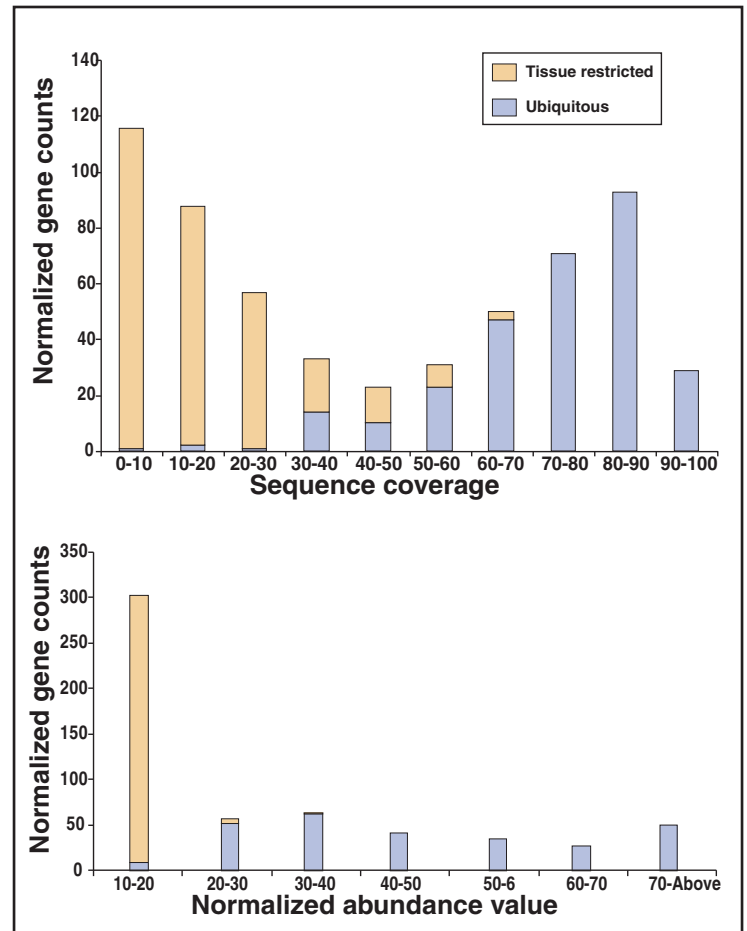

**Supplemental Information Figure D. Spectral counts and sequence coverage for translated non-coding RNAs.** i. The sequence coverage and spectral counts for translations from tissue restricted non-coding RNAs were lower than ubiquitously expressed non-coding RNAs. ii. Similar trend was observed for ubiquitously expressed and tissue restricted known proteins.

**Experimentally Validated MS/MS spectra**

# YSTAPSIVVR

Experiment

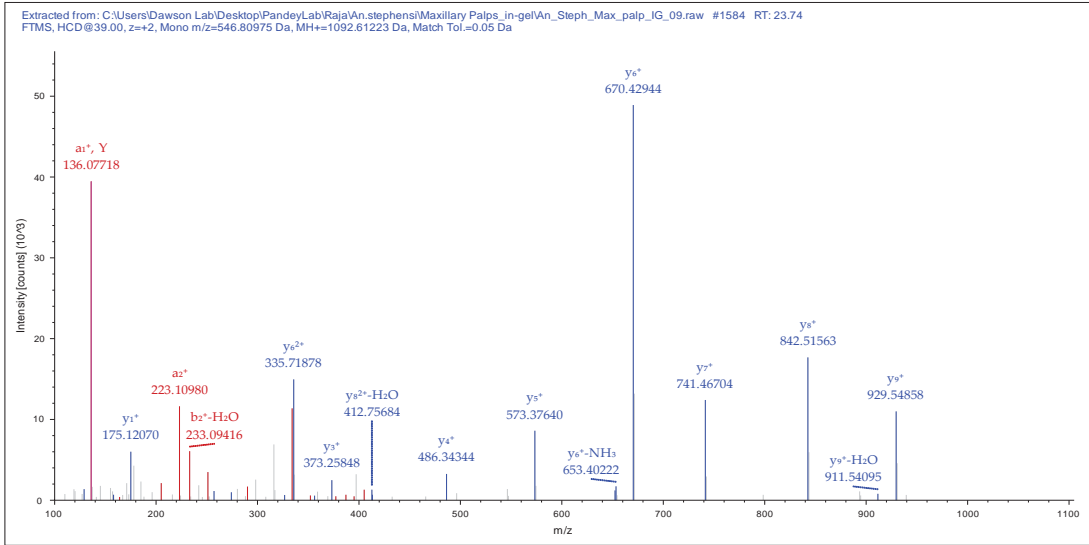

Validated

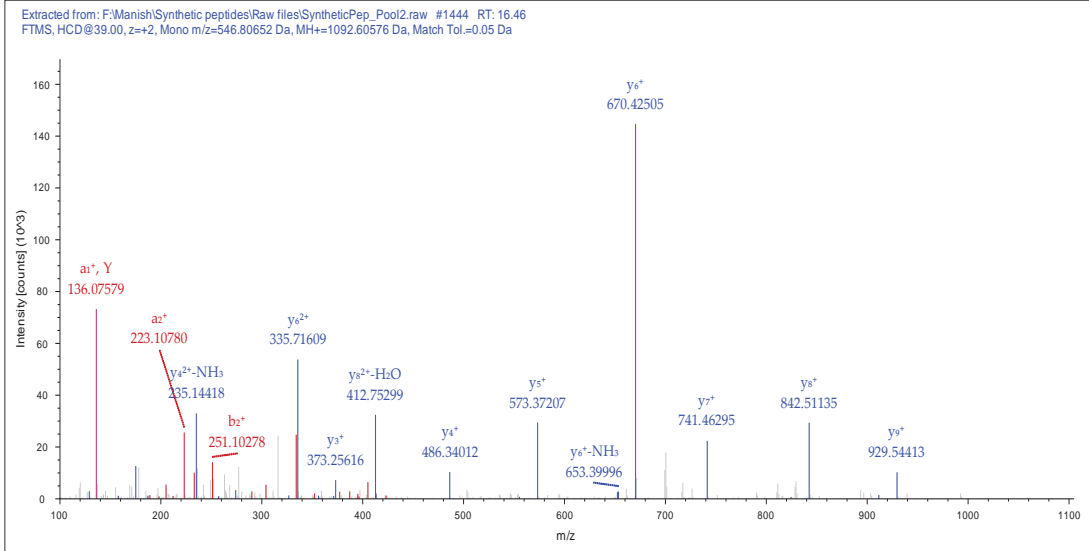

# AAFENEVAGESK

Experiment

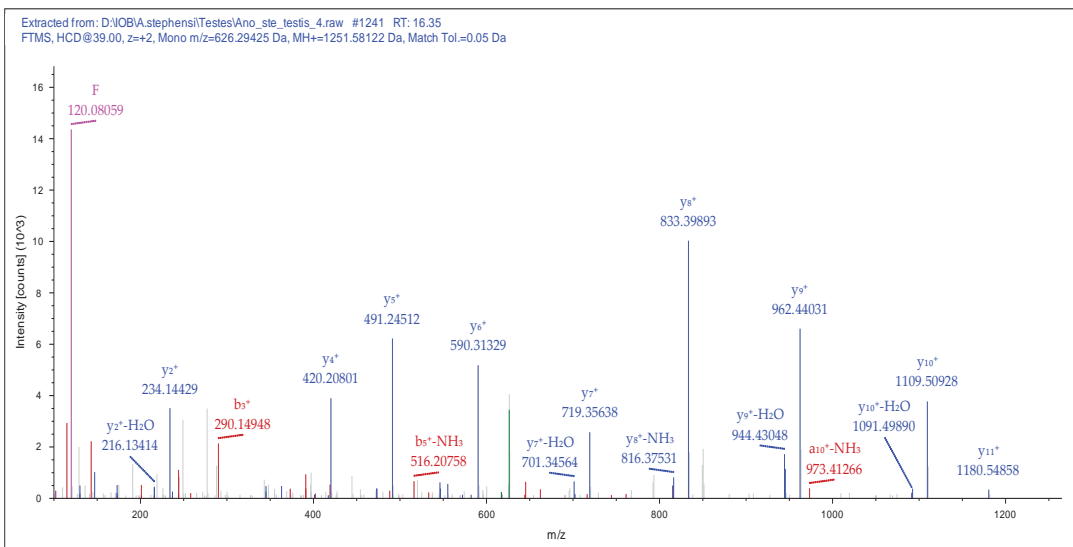

Validated

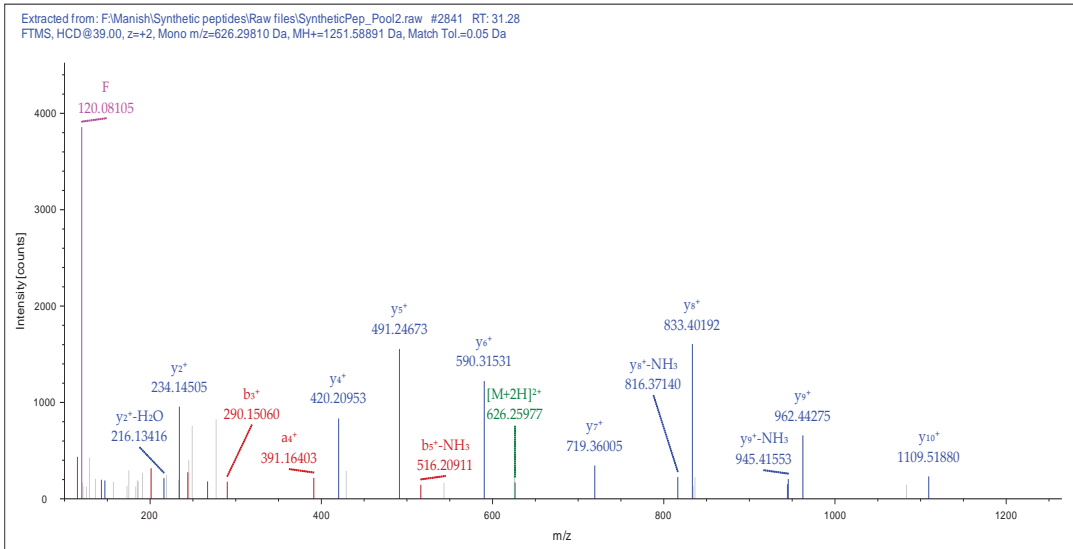



# AIAQSDEELLKR

Experiment

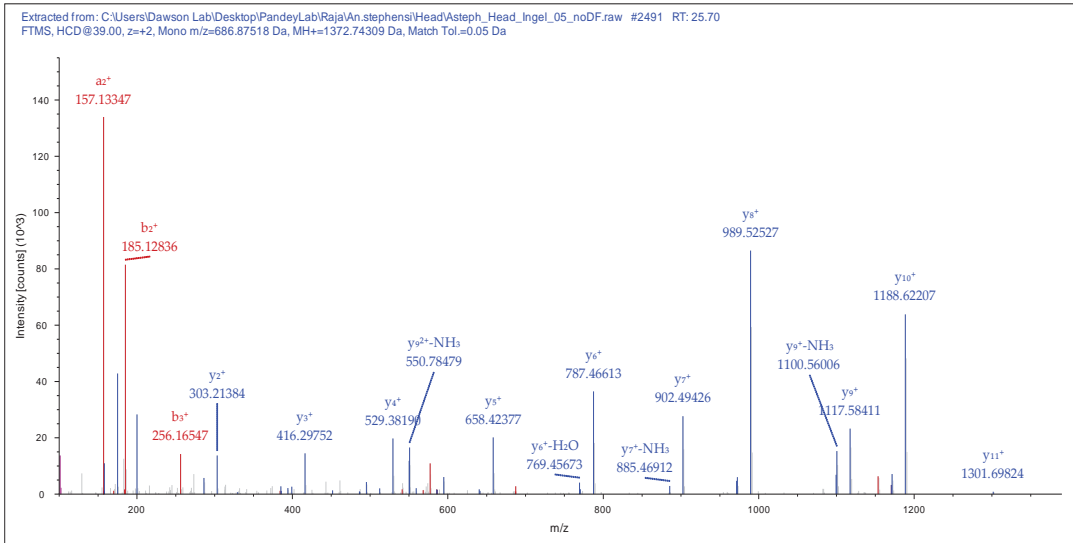

Validated

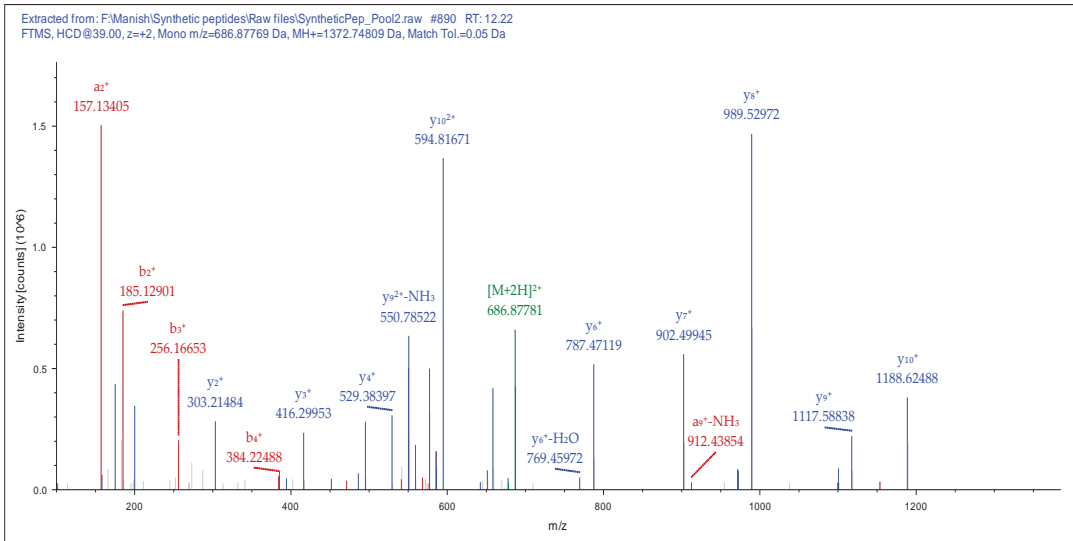

# AAIPVISDIQR

Experiment

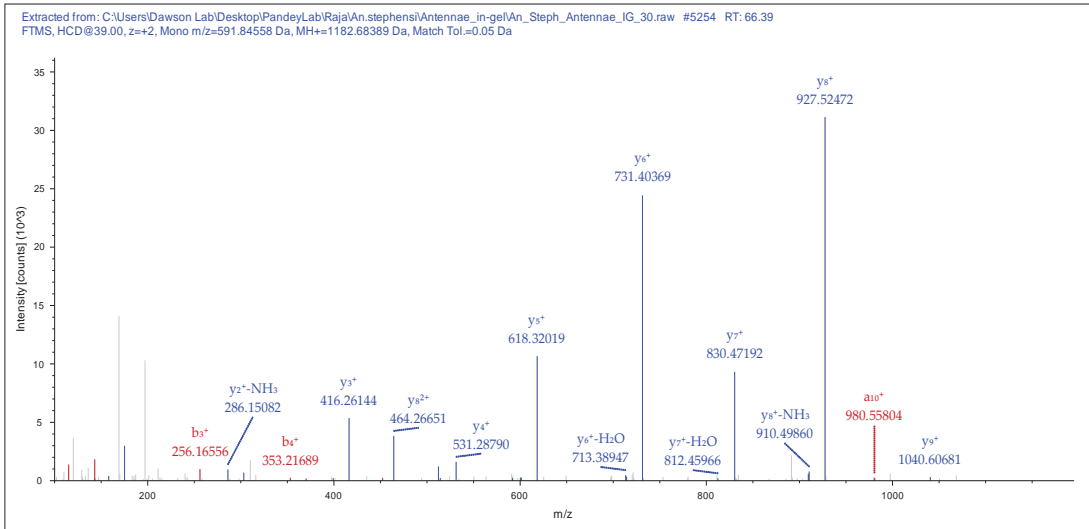

Validated

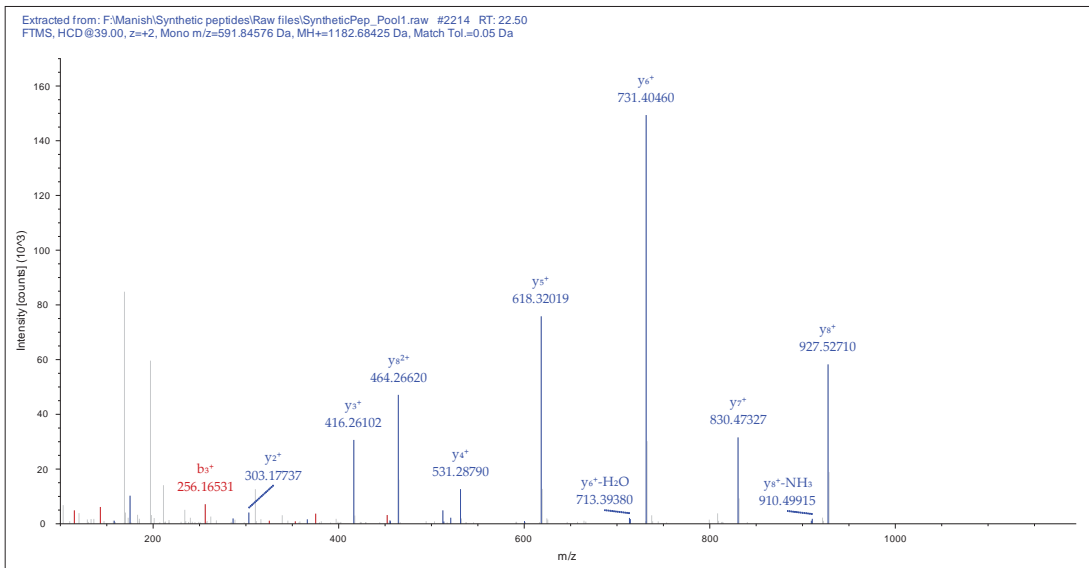

# AGTININEGTVR

Experiment

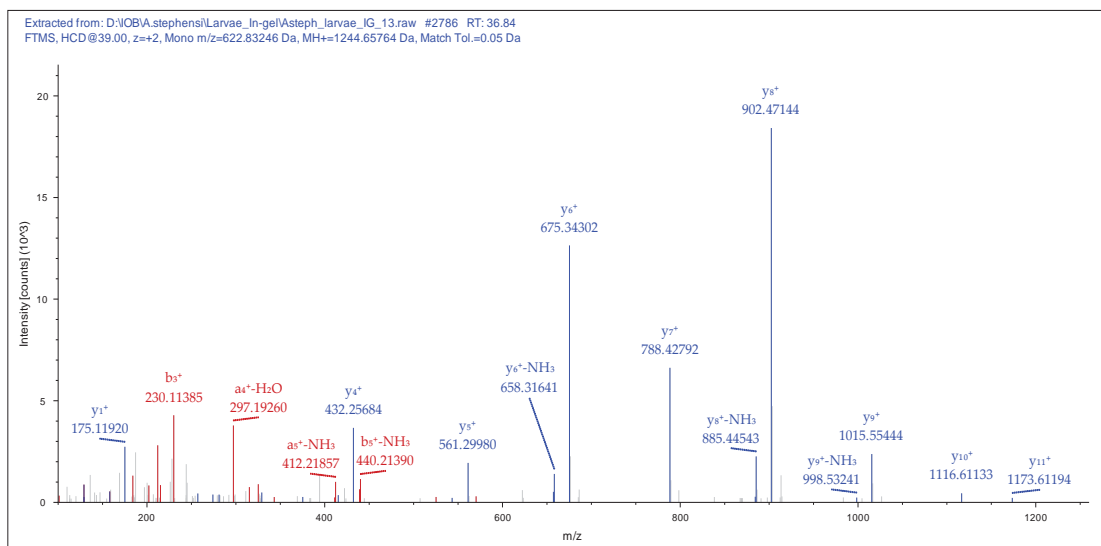

Validated

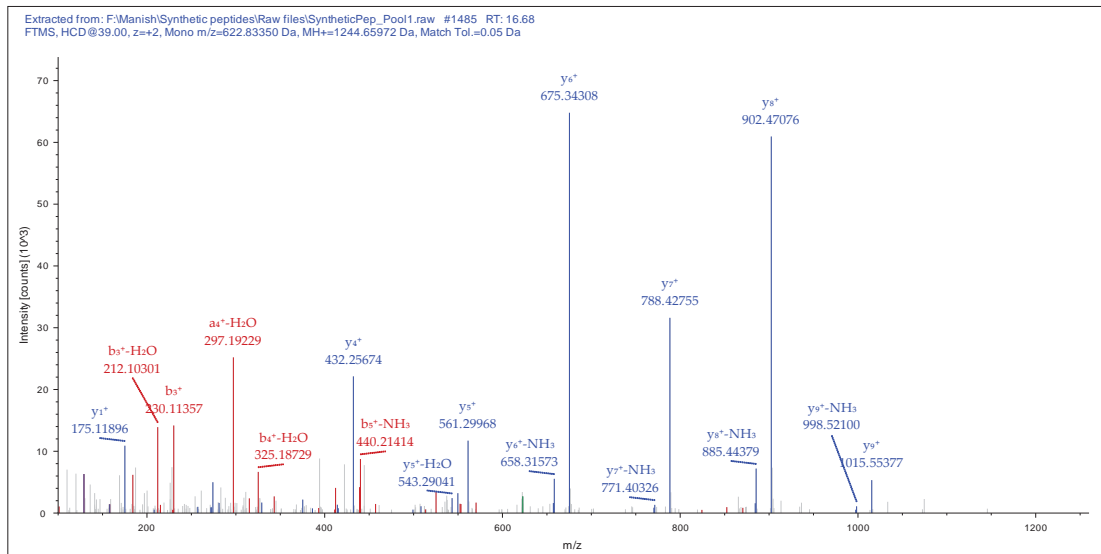

# AINEDLEEVWEGTK

Experiment

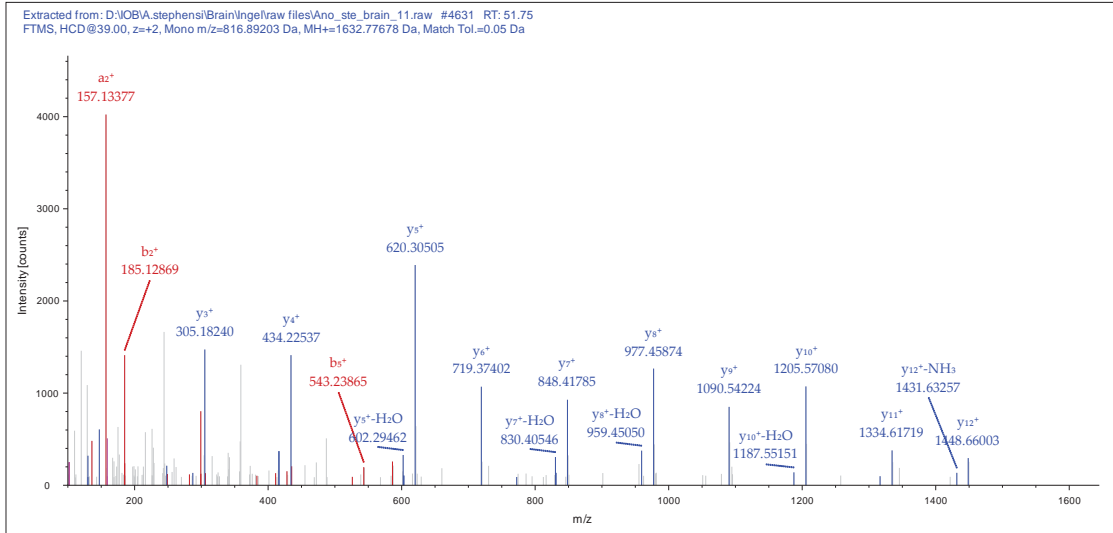

Validated

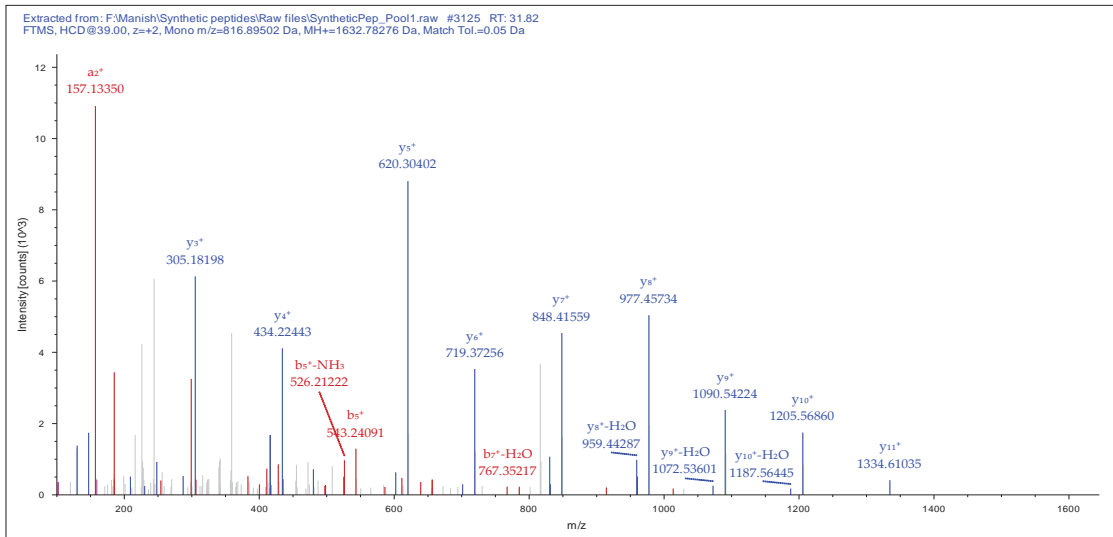

# DVNVWVGIGGALDR

Experiment

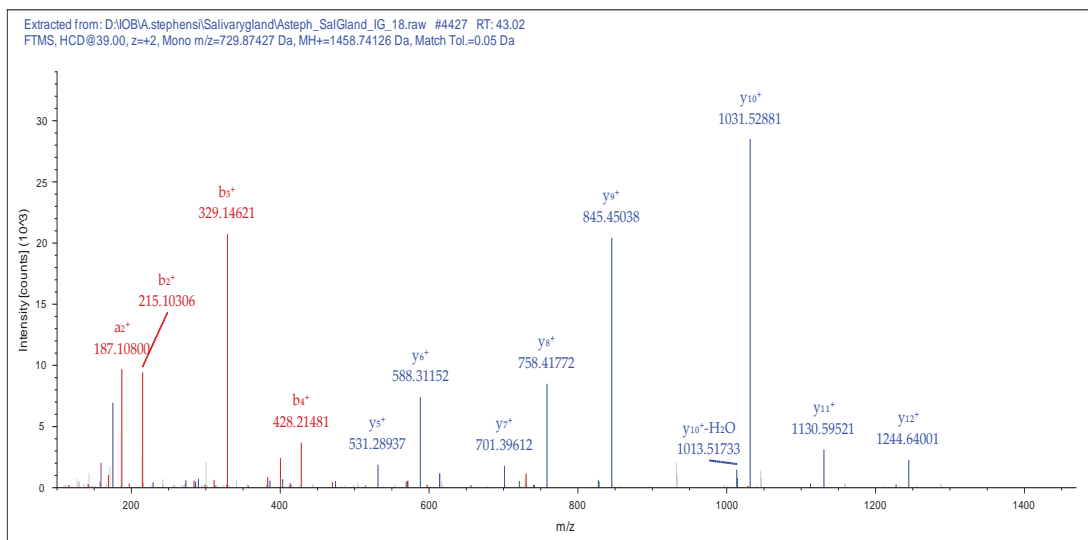

Validated

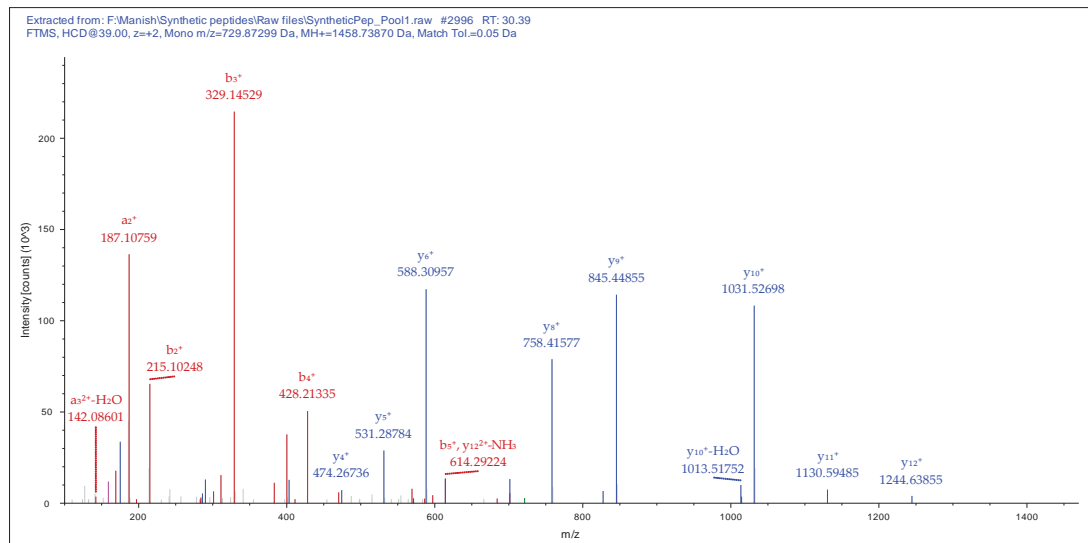

# ERTQYFAELNDAR

Experiment

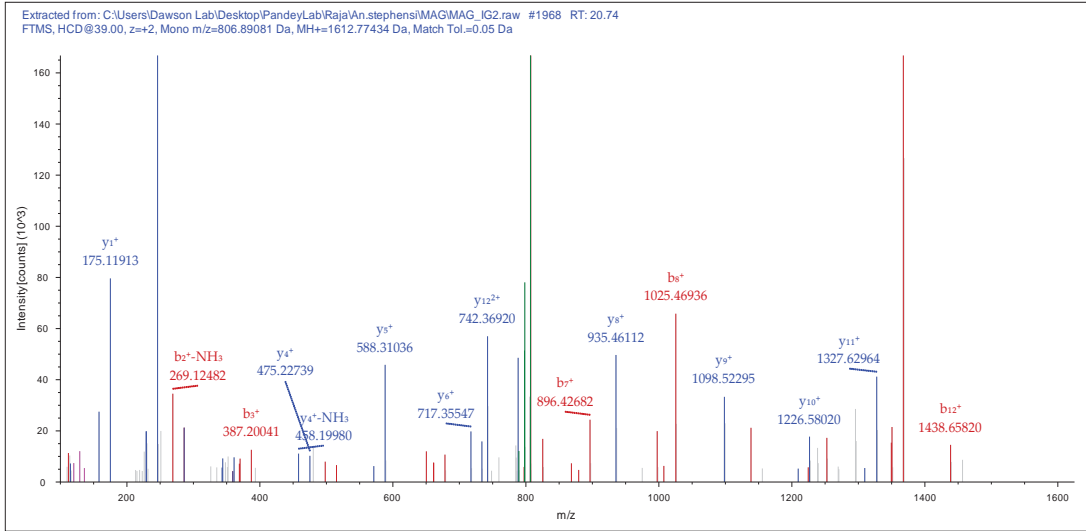

Validated

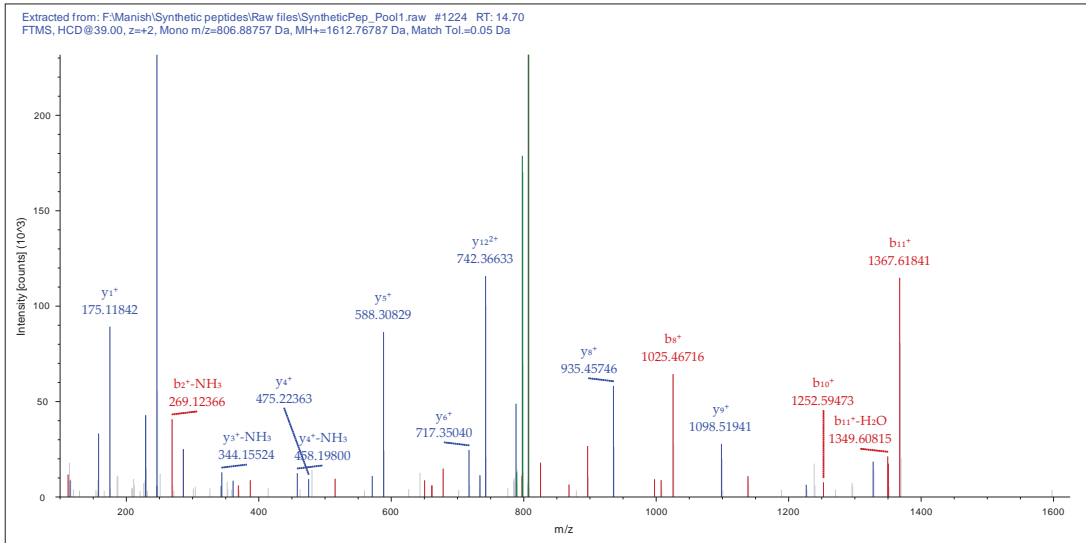

# FADSIQEASAVLR

Experiment

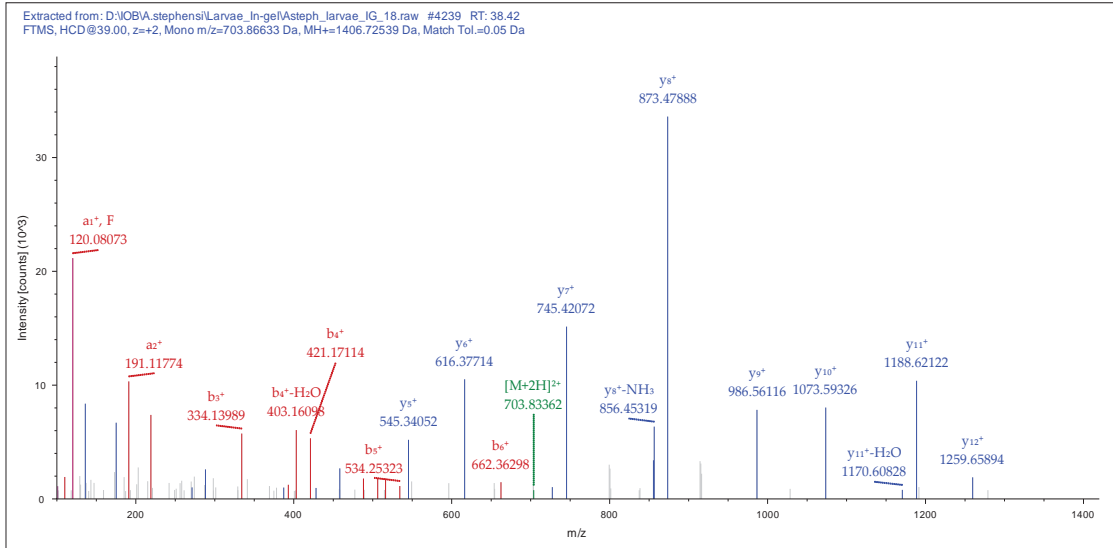

Validated

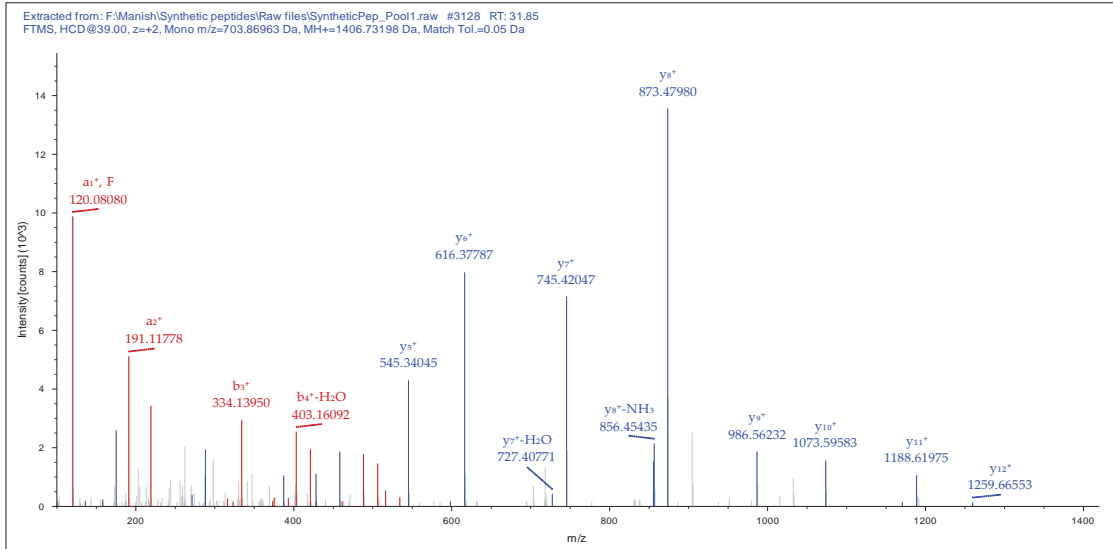

# FPSHFGSELKDLLR

Experiment

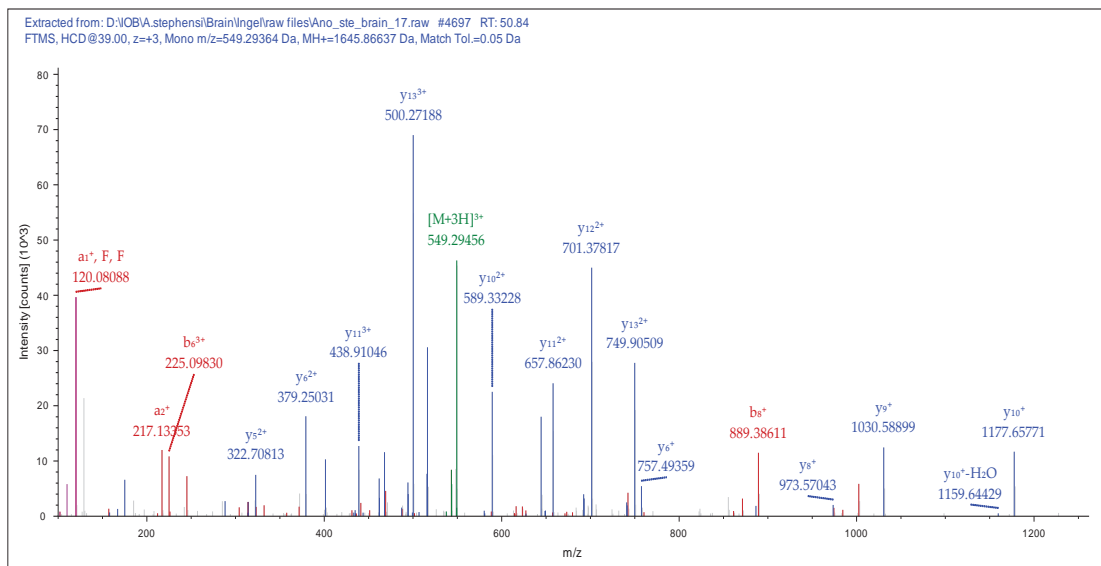

Validated

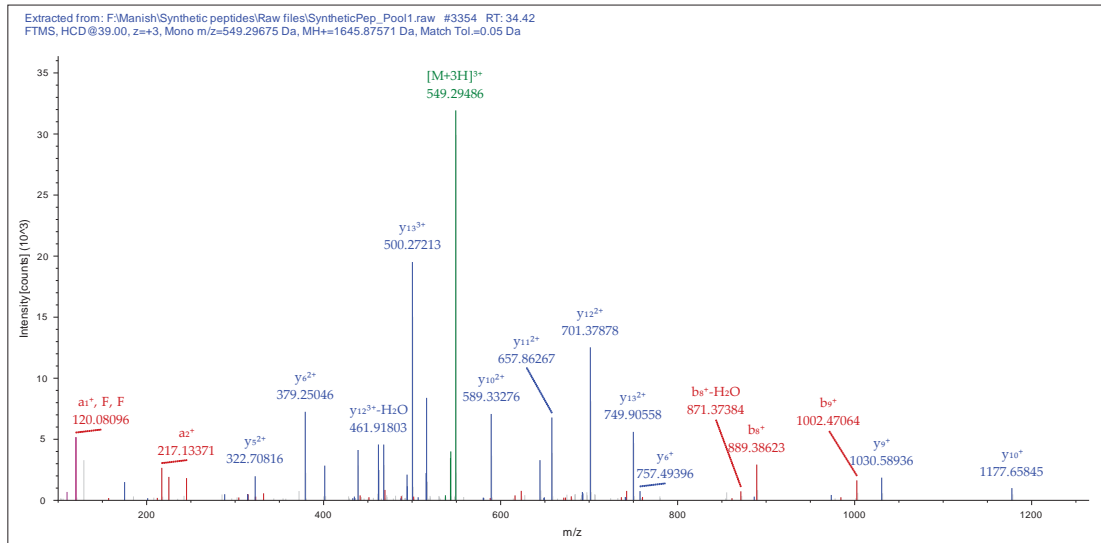



# GLWEEIGVWK

Experiment

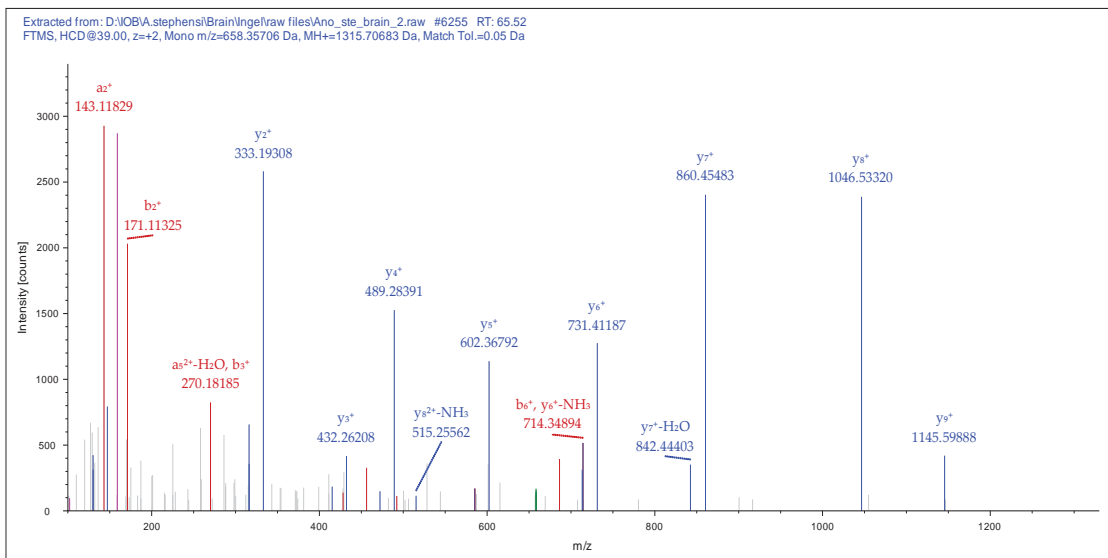

Validated

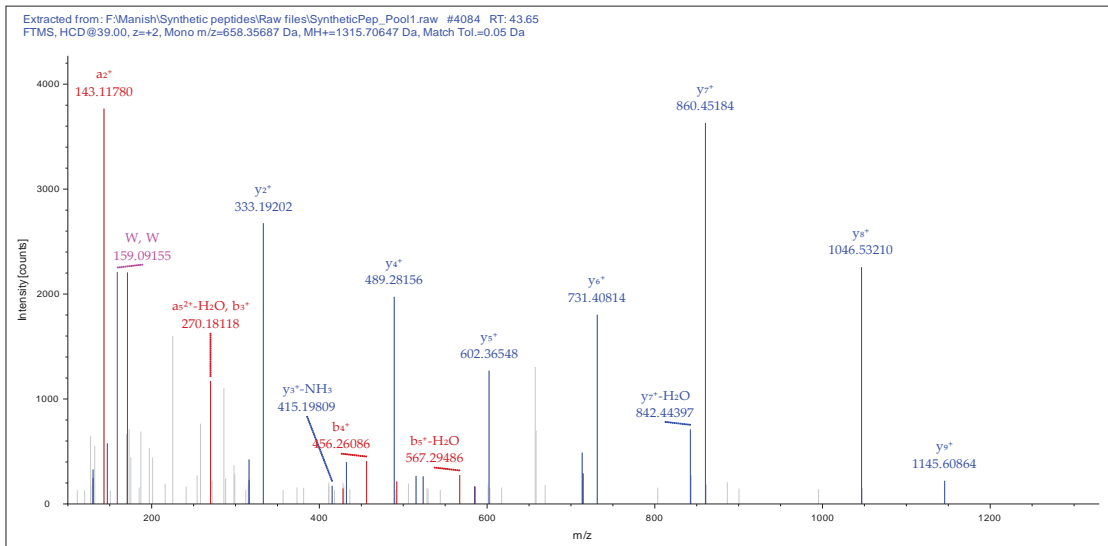

# EGTFQGLHTFPVTIGLR

Experiment

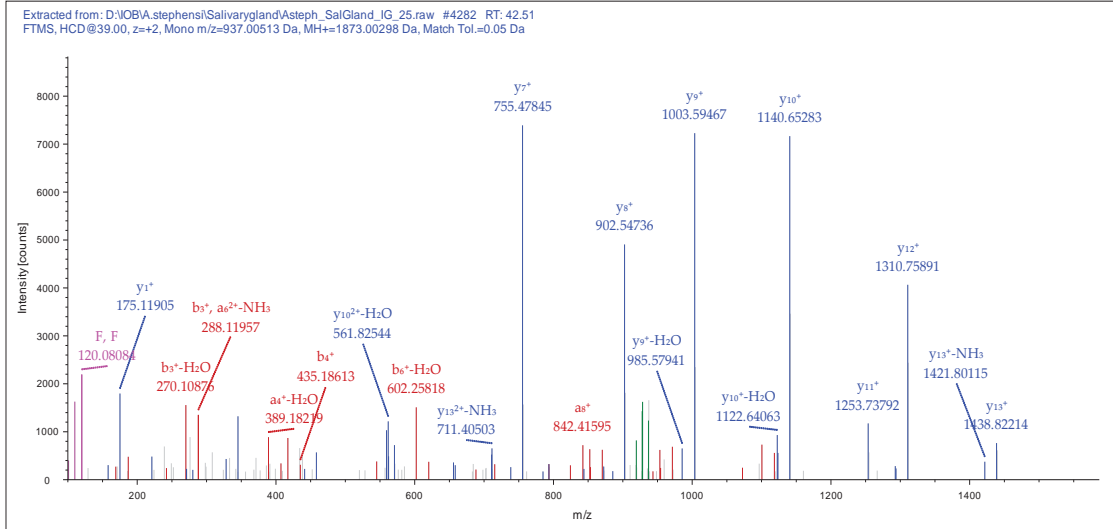

Validated

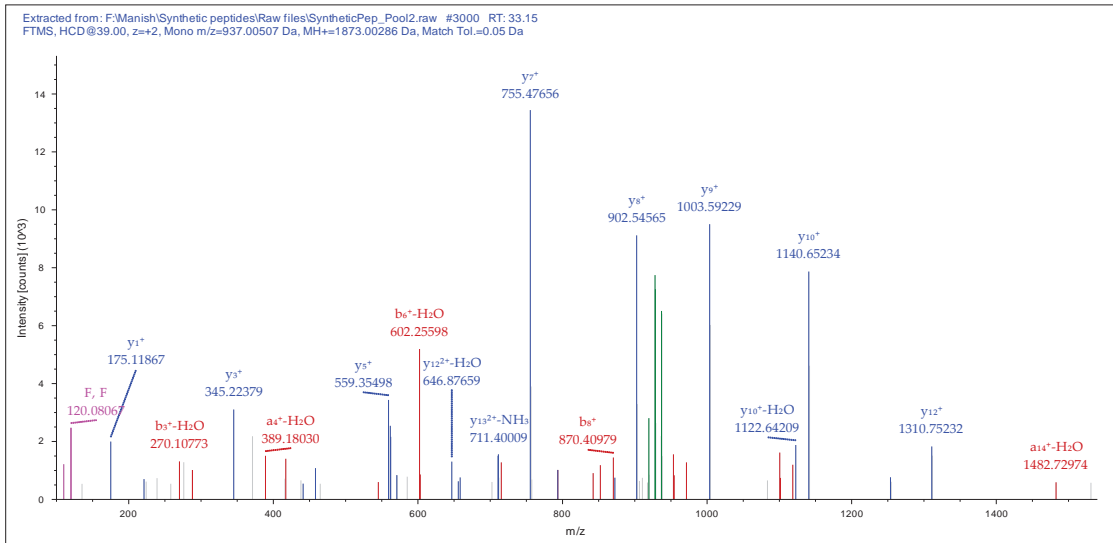

# FEVPNQSDER

Experiment

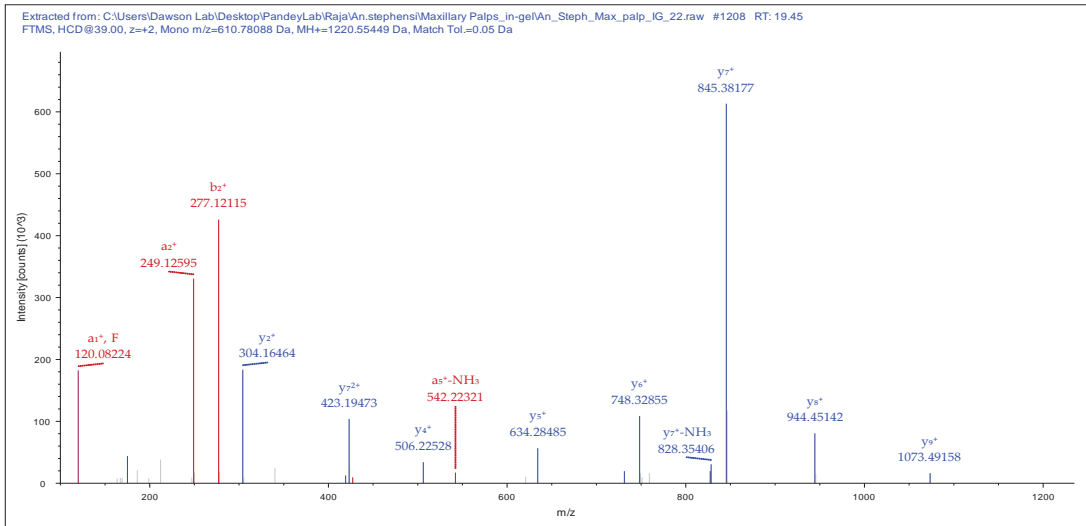

Validated

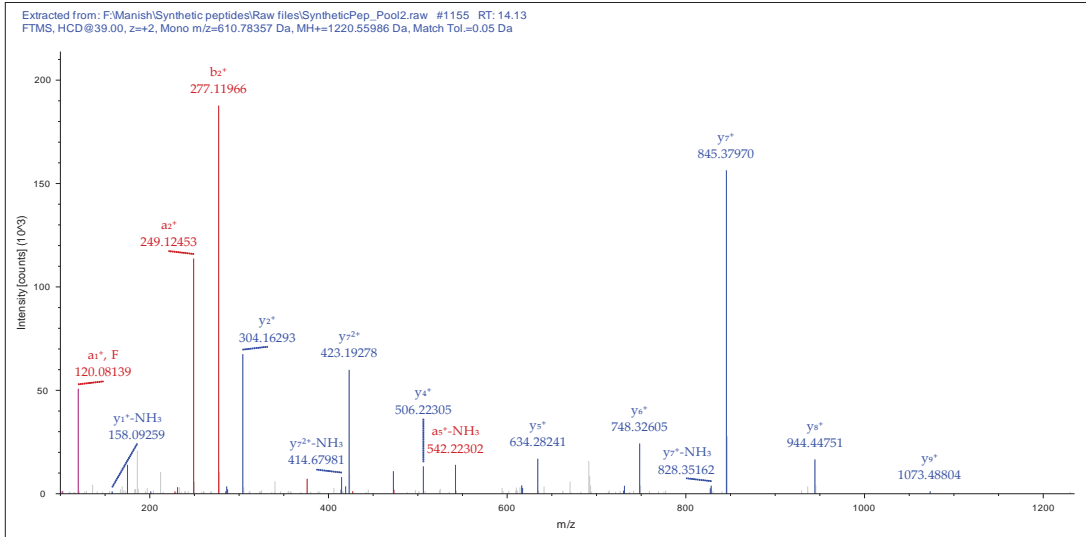

# FFAYPITSYYSYR

Experiment

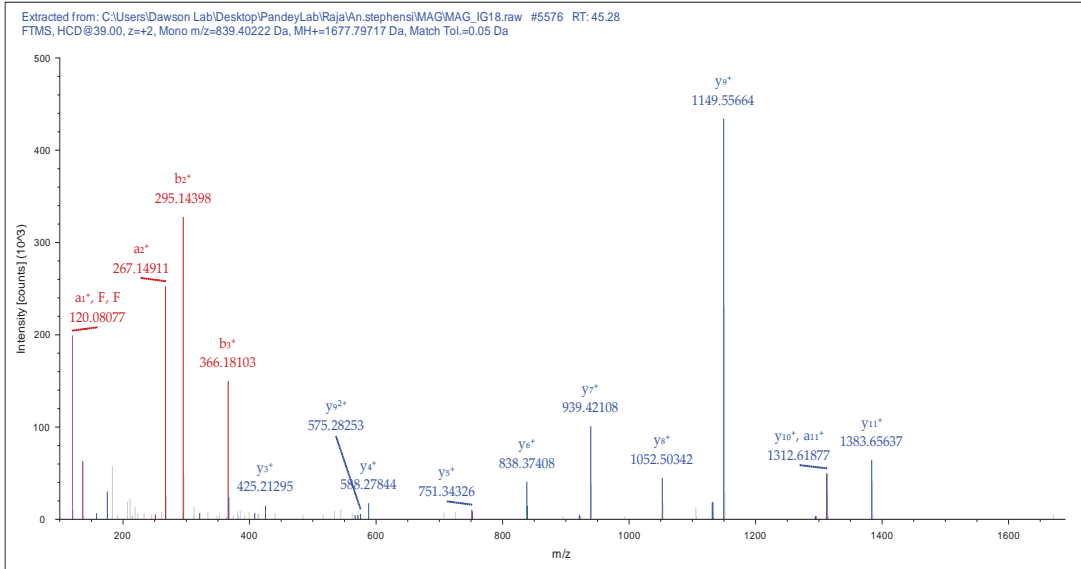

Validated

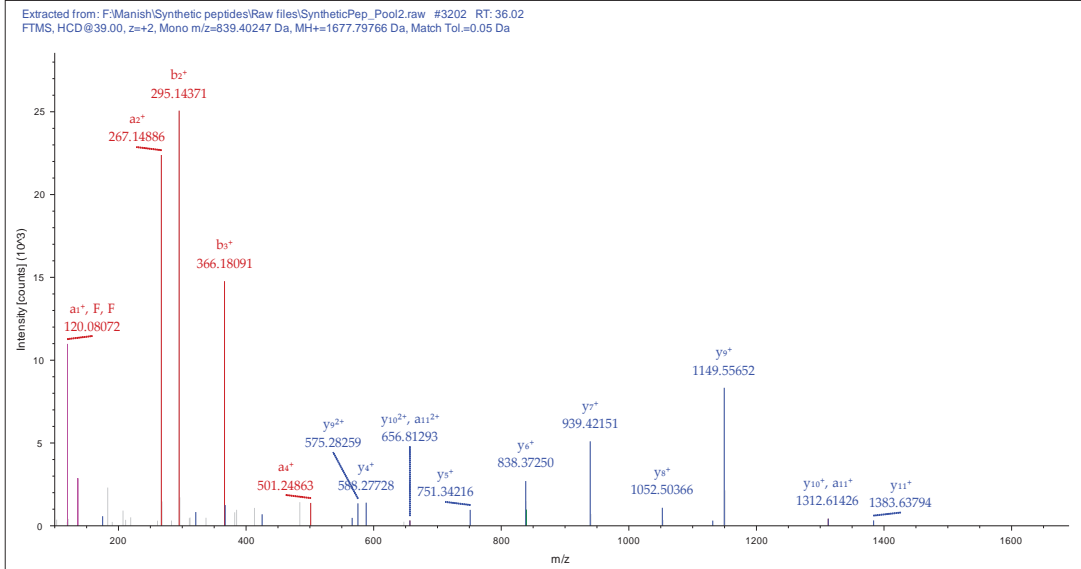

# GISLLEVIDLPANNK

Experiment

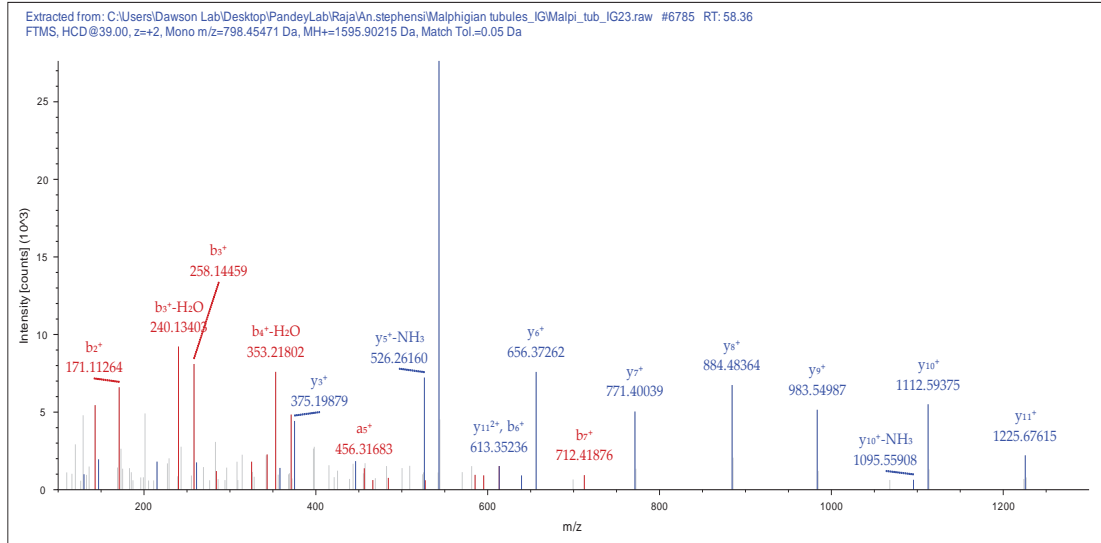

Validated

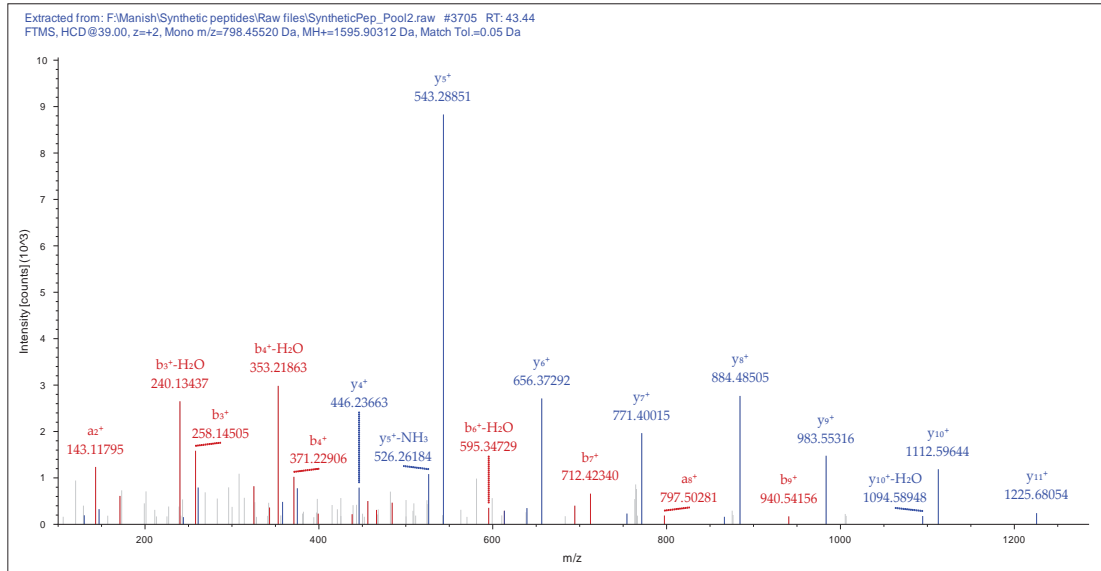

# GSYSLIEPDGSR

Experiment

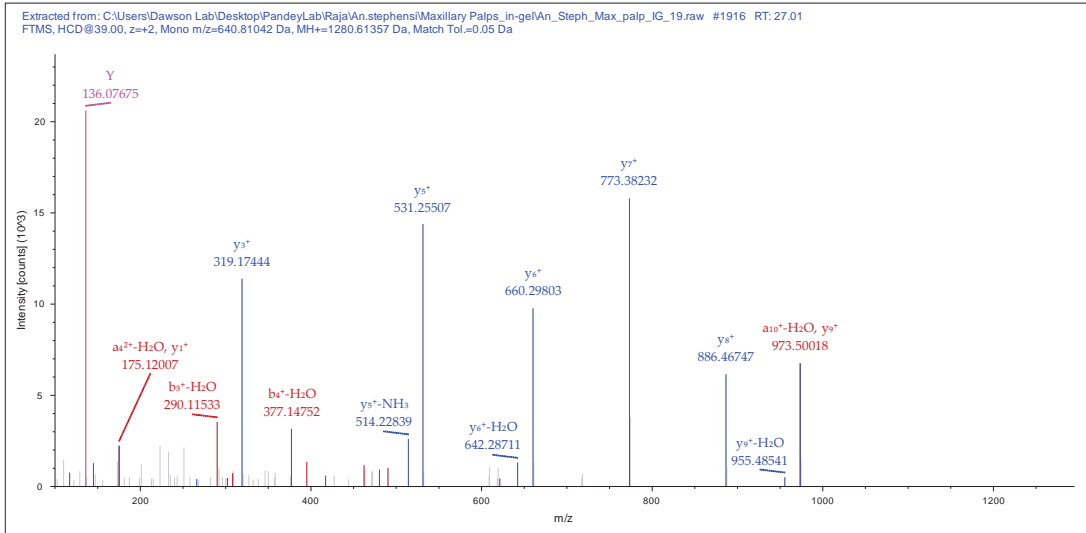

Validated

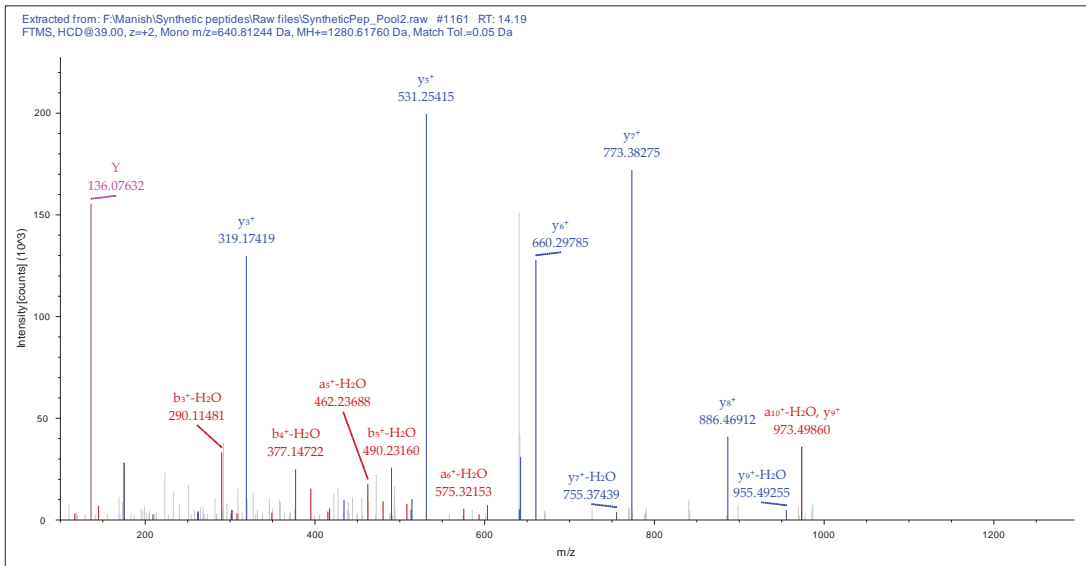

# GWSLPLDYISVER

Experiment

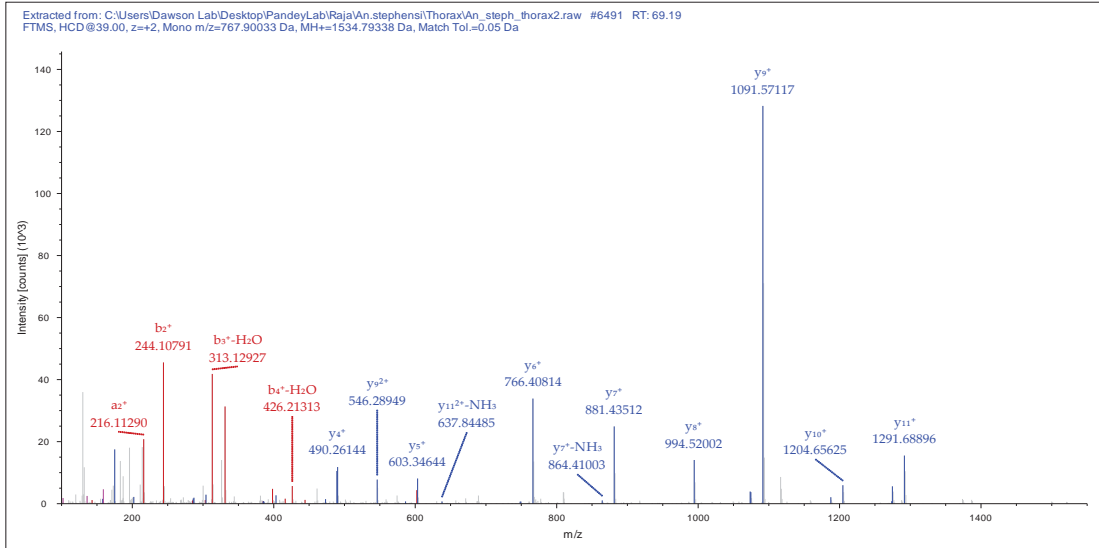

Validated

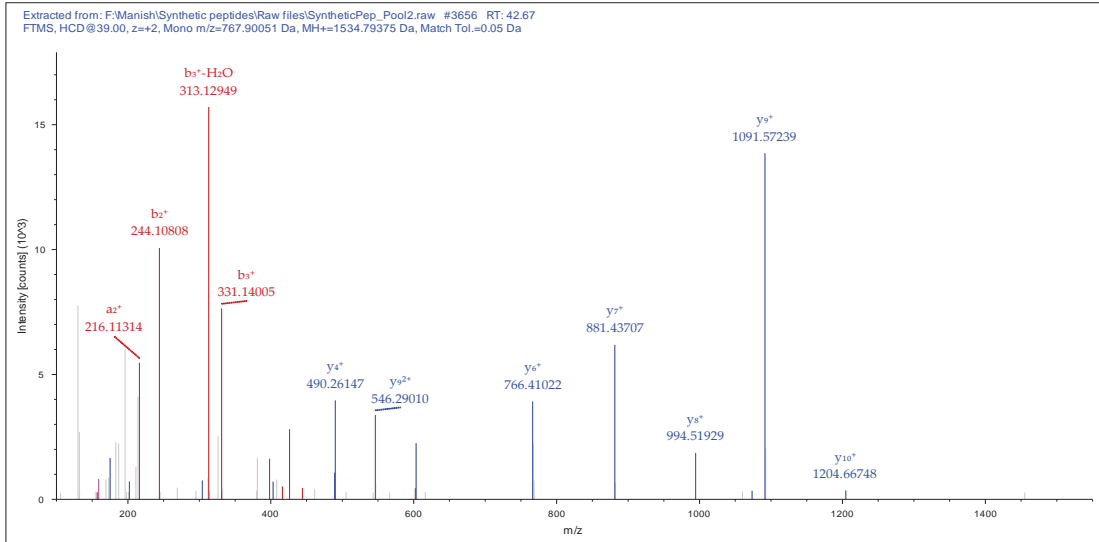

# HQIDSVPTVLF<sub>R</sub>

Experiment

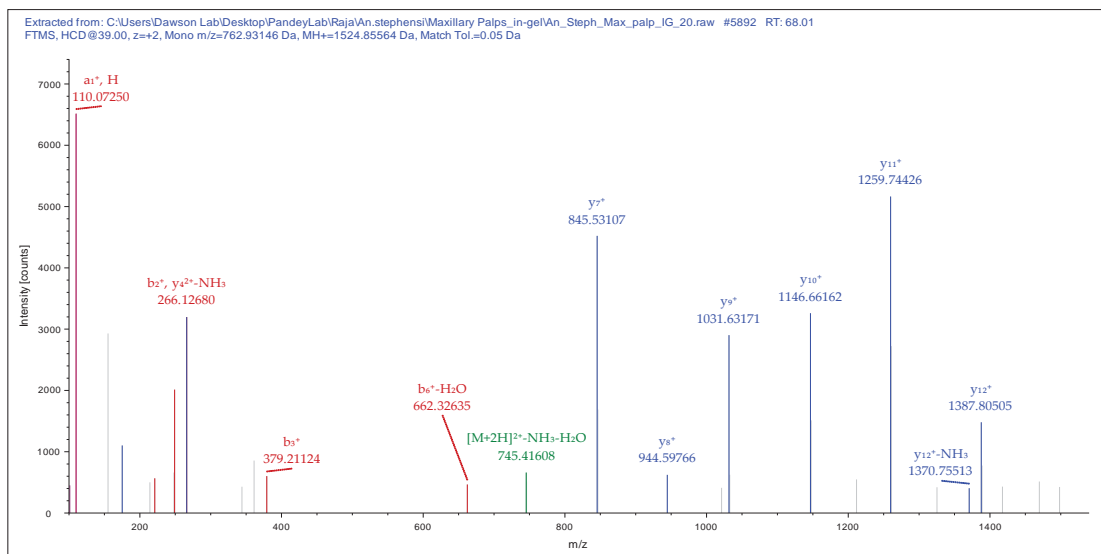

Validated

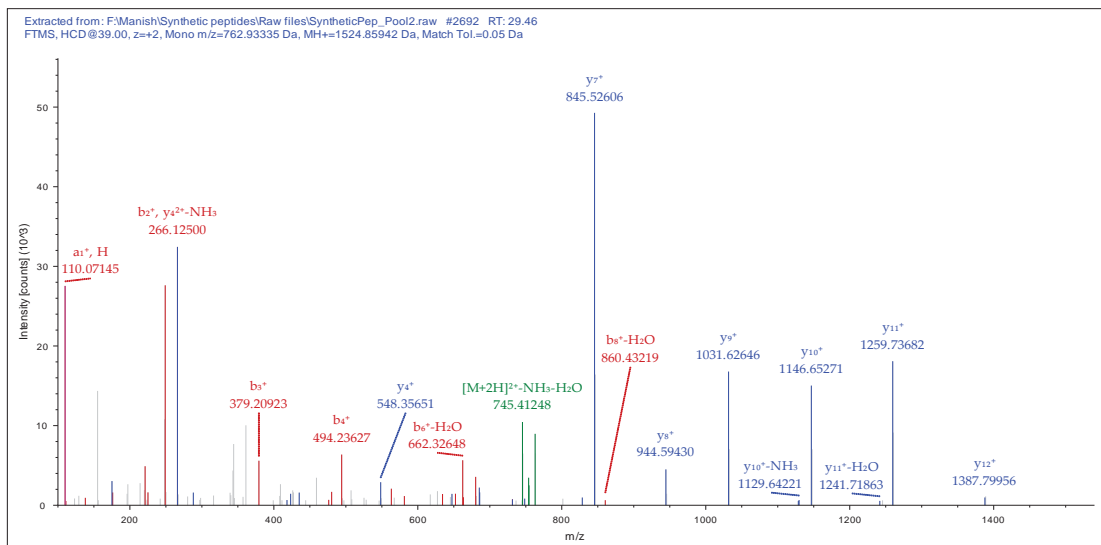



# I A V D L F F N N K

Experiment

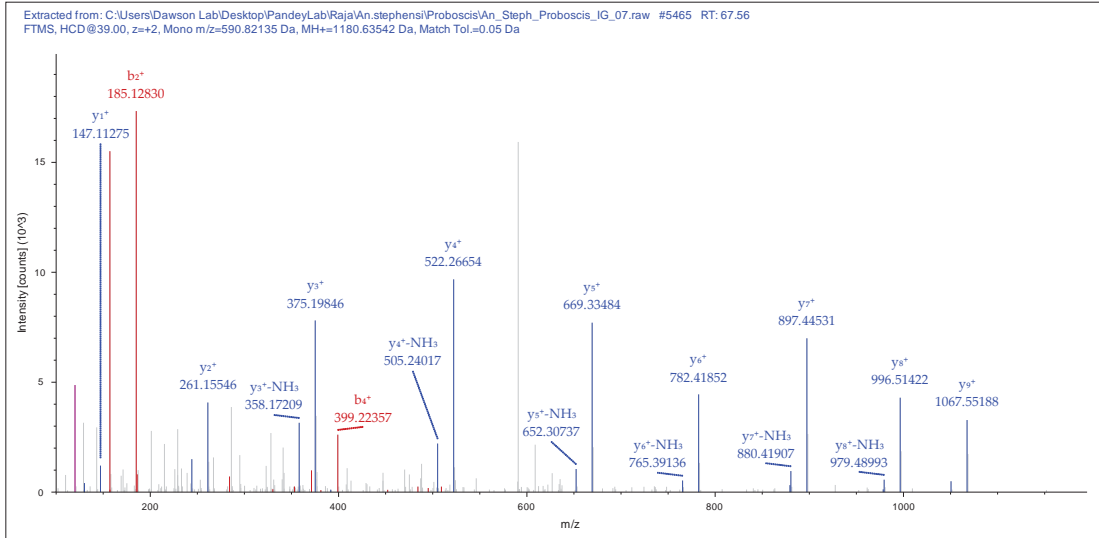

Validated

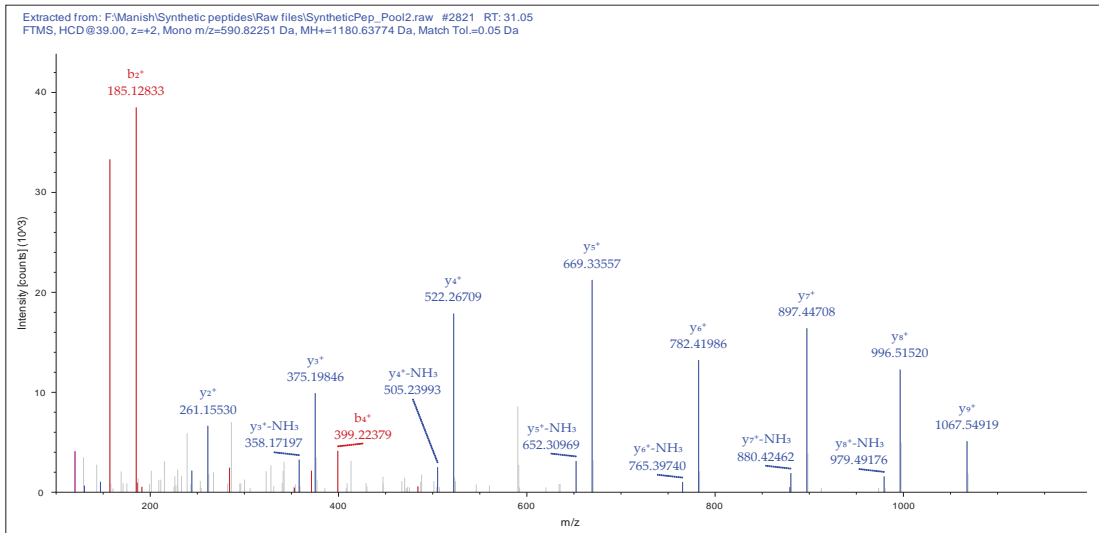

# IDLENLTSQR

Experiment

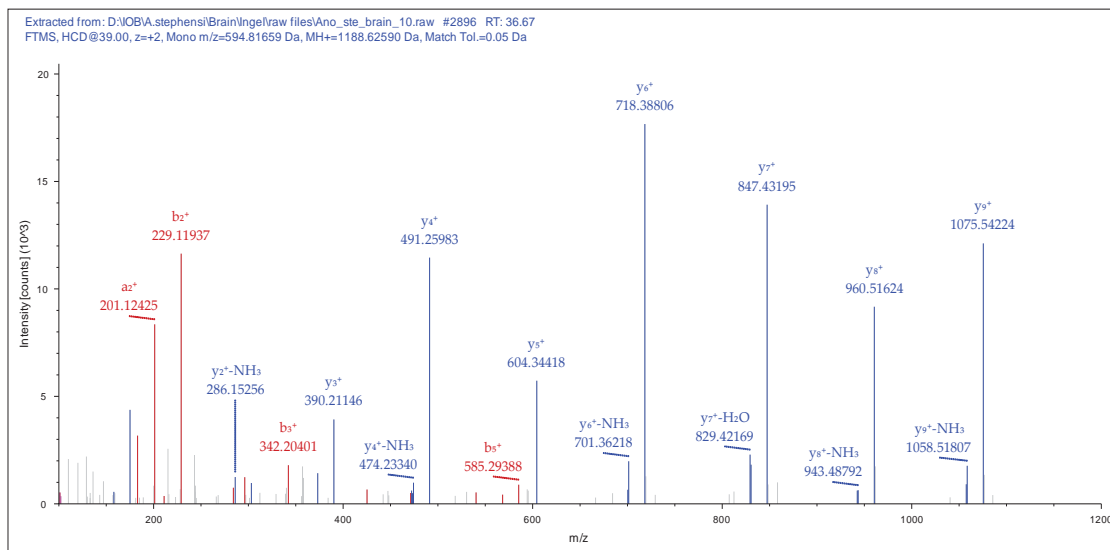

Validated

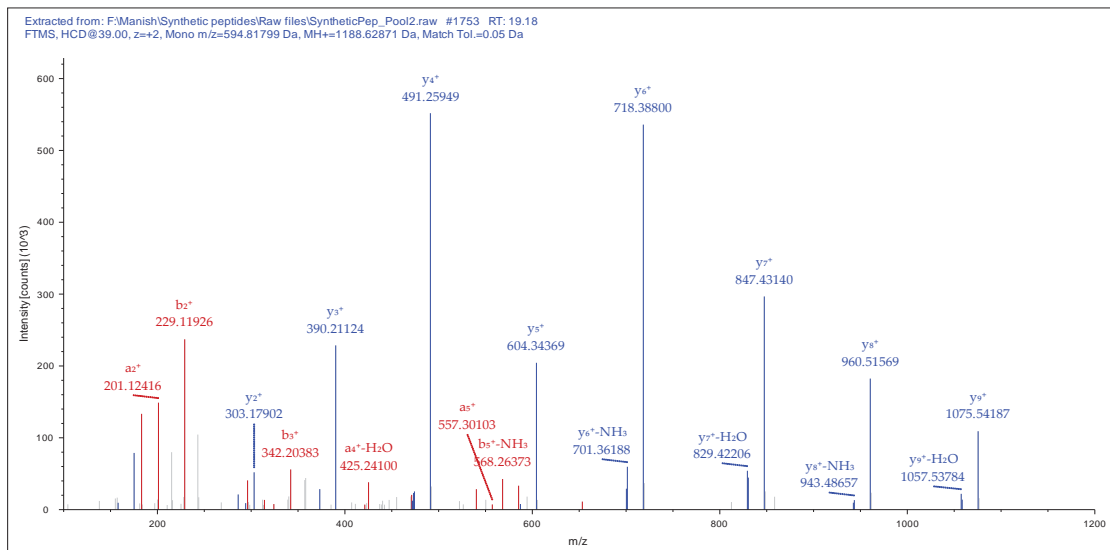

# IELINQLSETGLR

Experiment

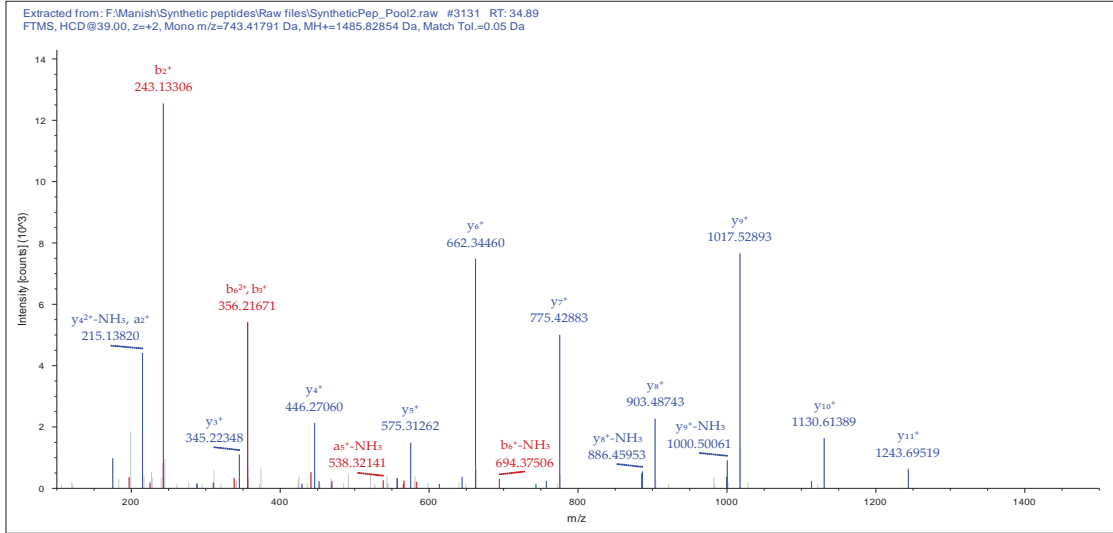

Validated

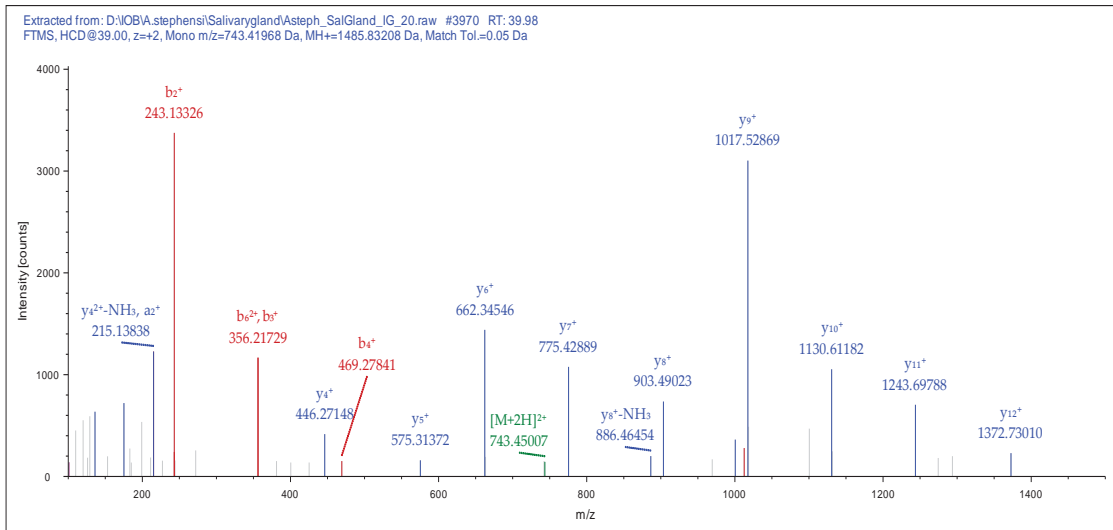

# IFGGTDVEDGTAPYLVALLR

Experiment

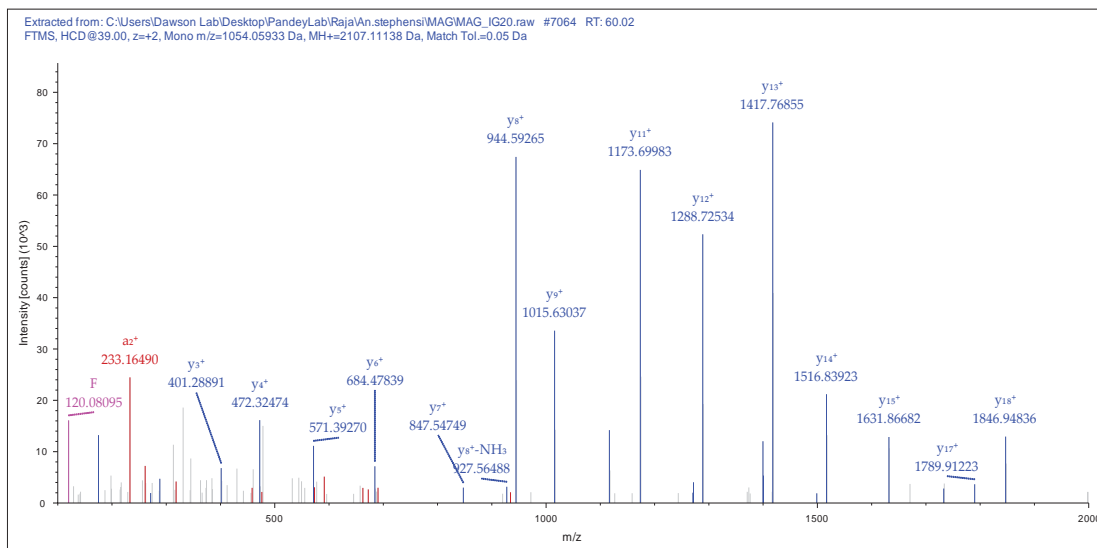

Validated

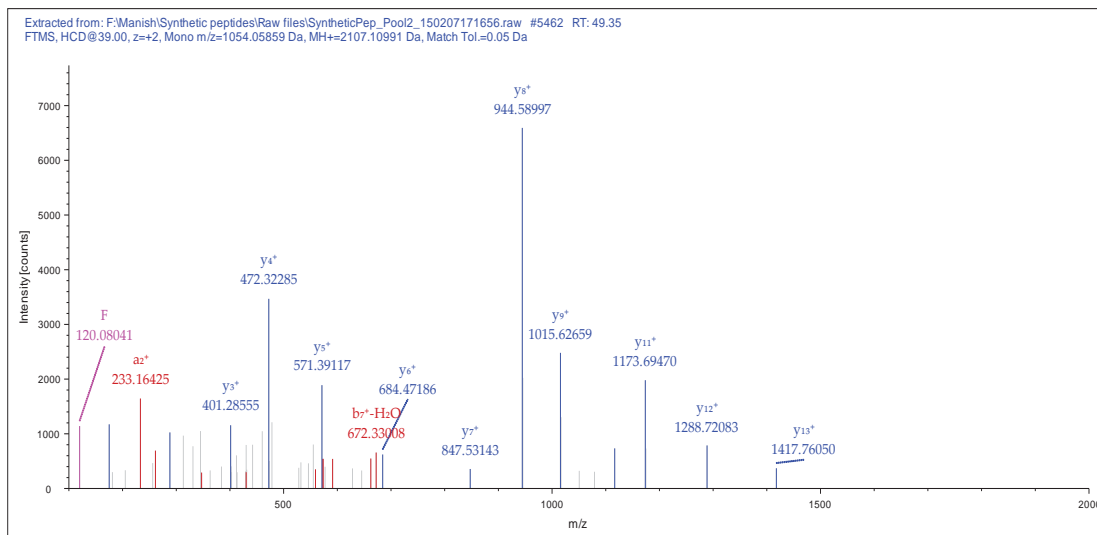

# IITTPQATAIGVAGSSGK

Experiment

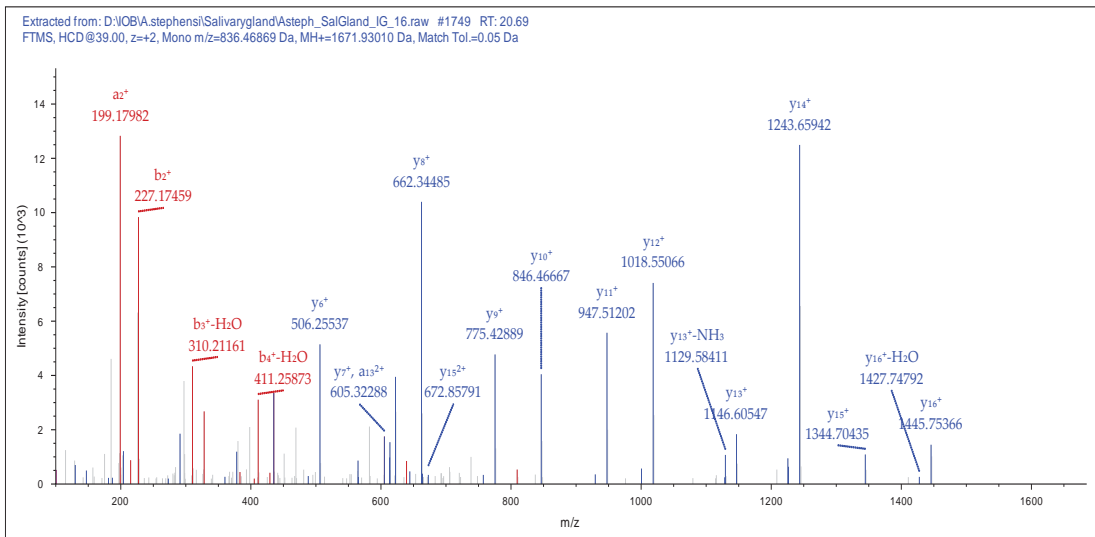

Validated

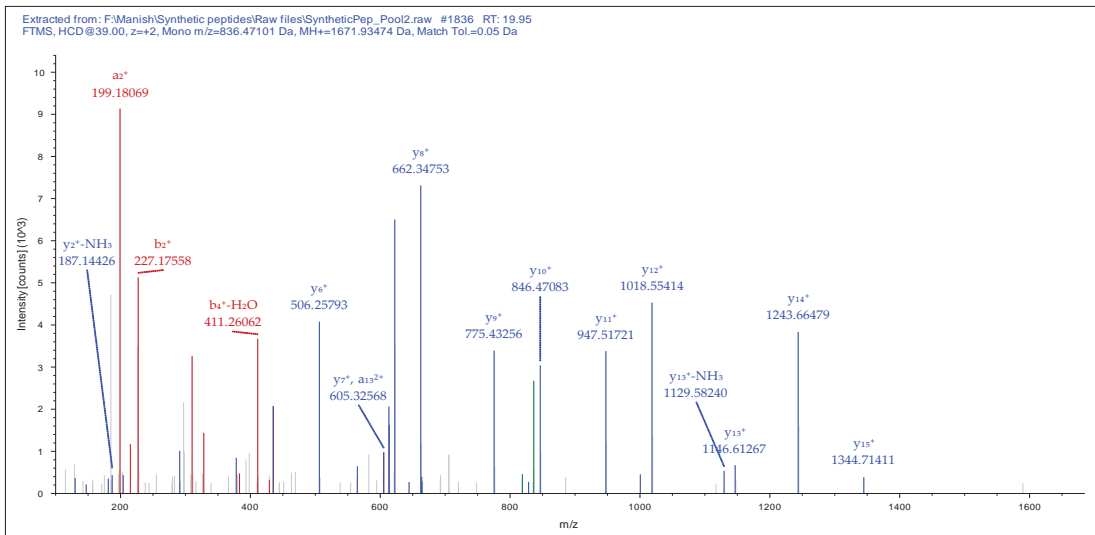

# ILTQYPTQLR

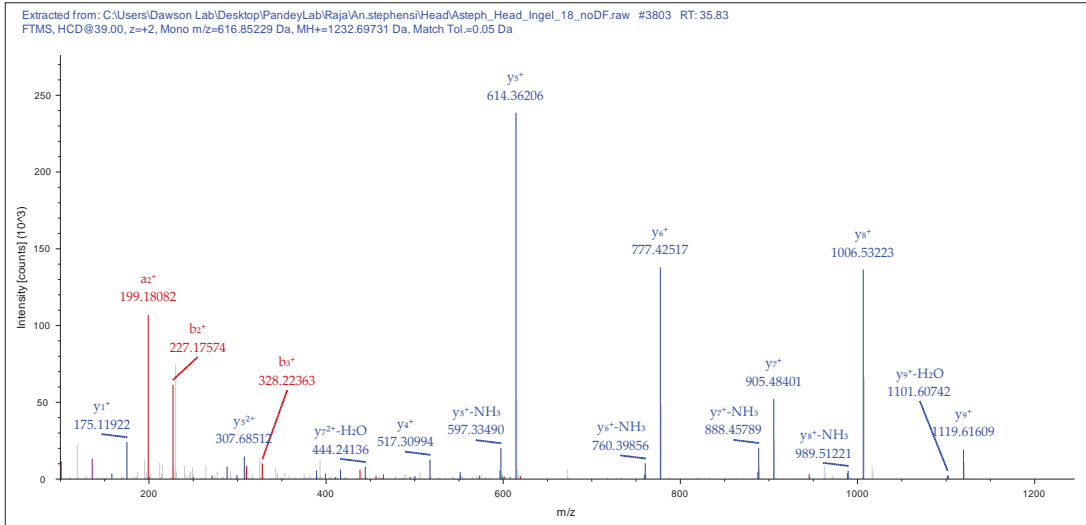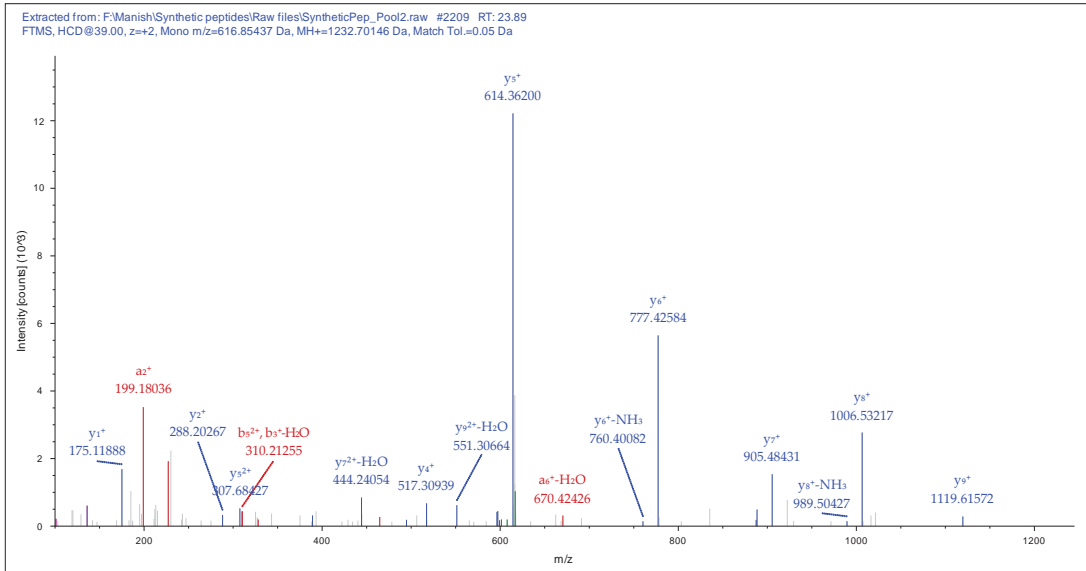

Experiment

Validated

# IPFHPYFIYK

Experiment

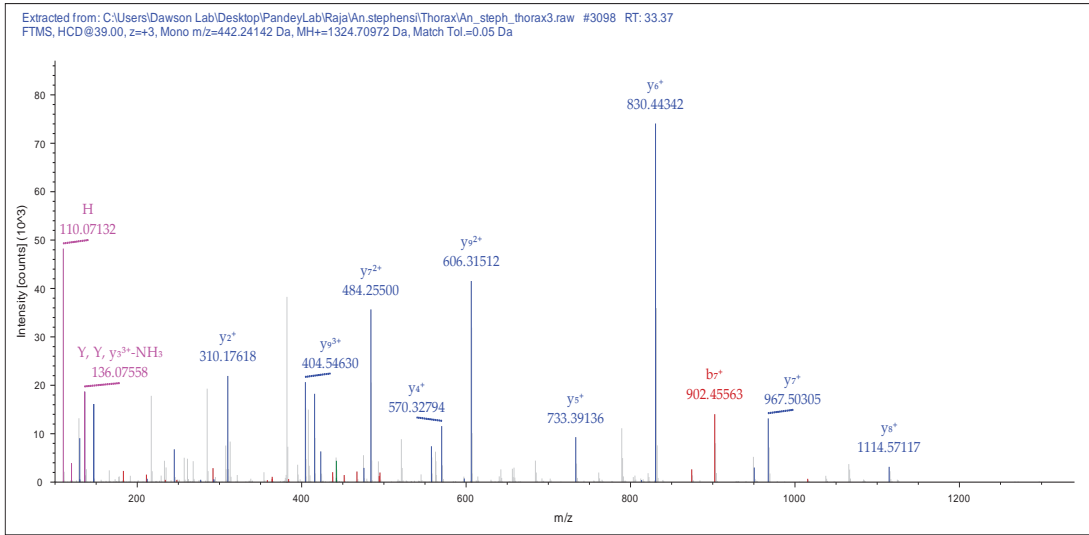

Validated

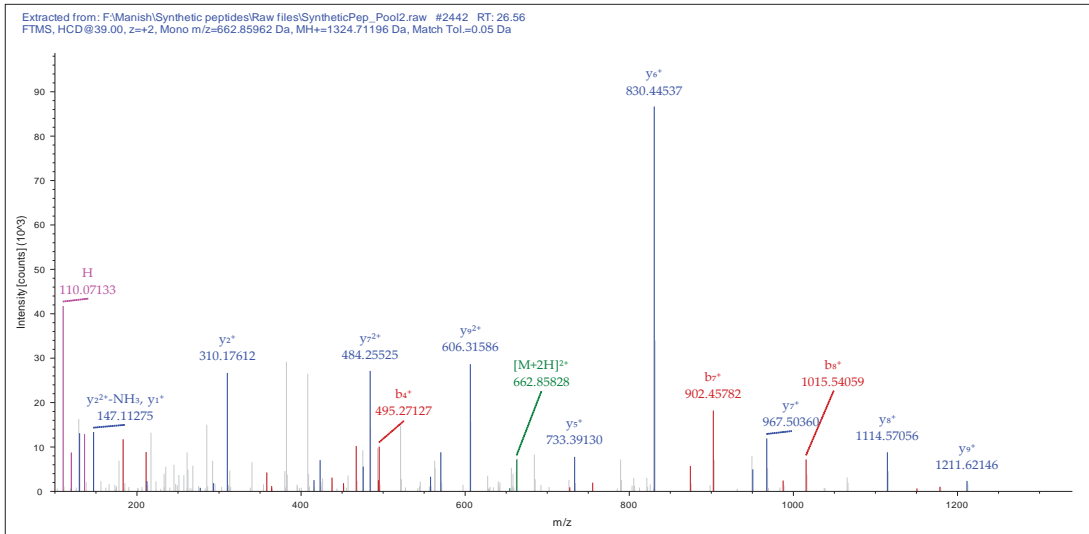

# DLTTDDAATLIQSVFR

Experiment

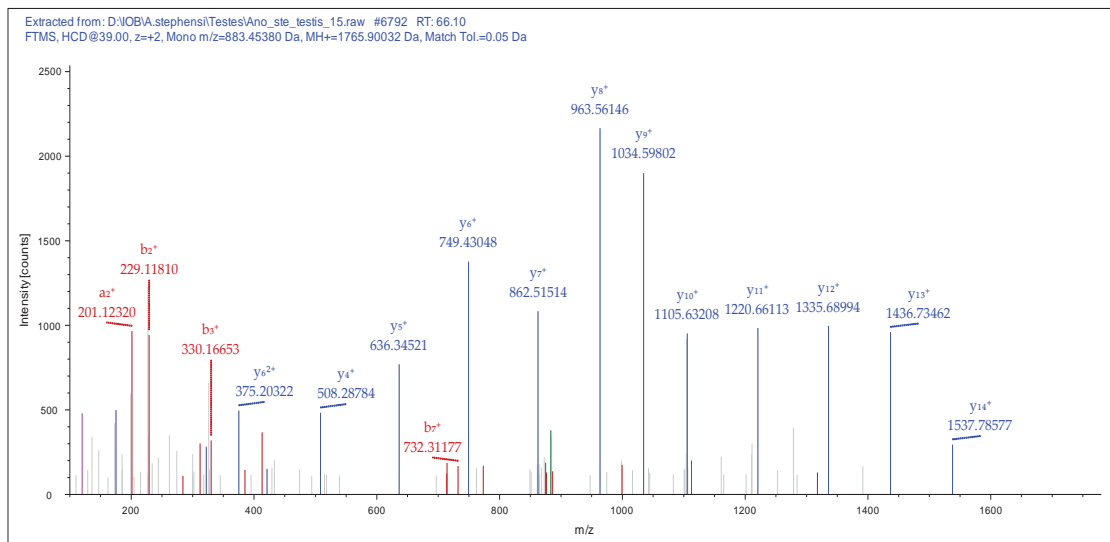

Validated

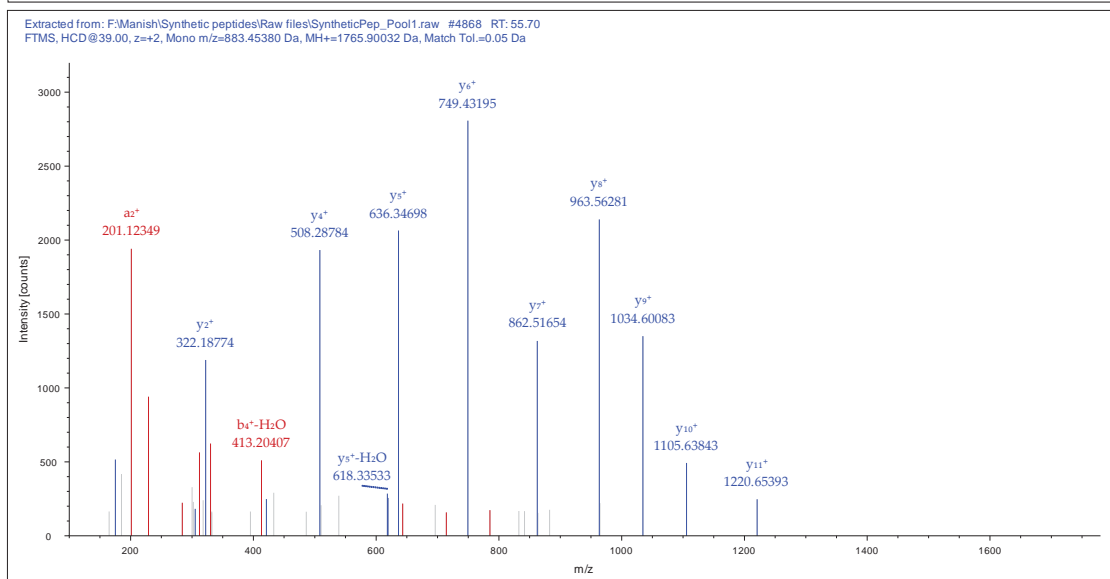



# KIDLENLTSQR

Experiment

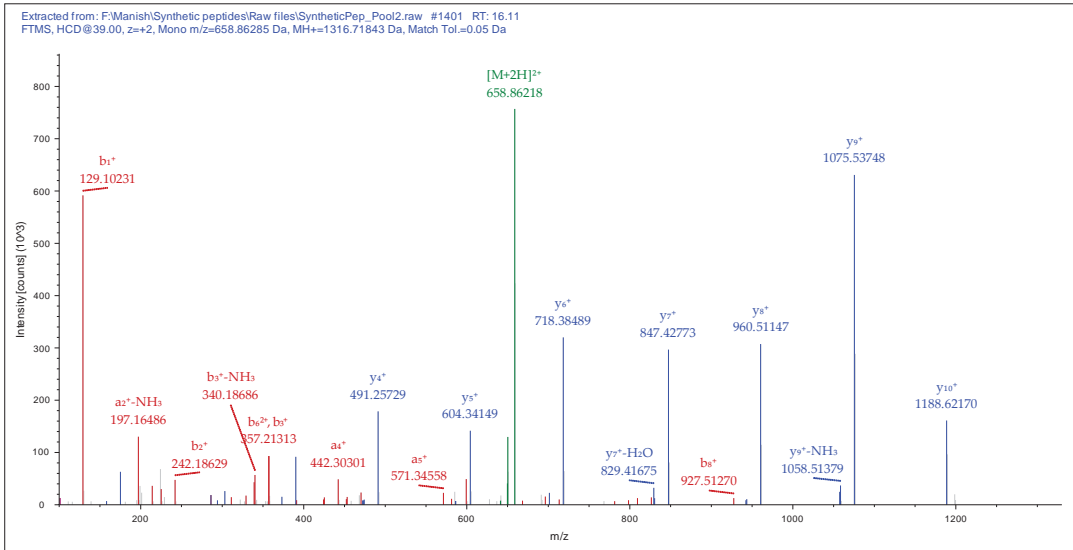

Validated

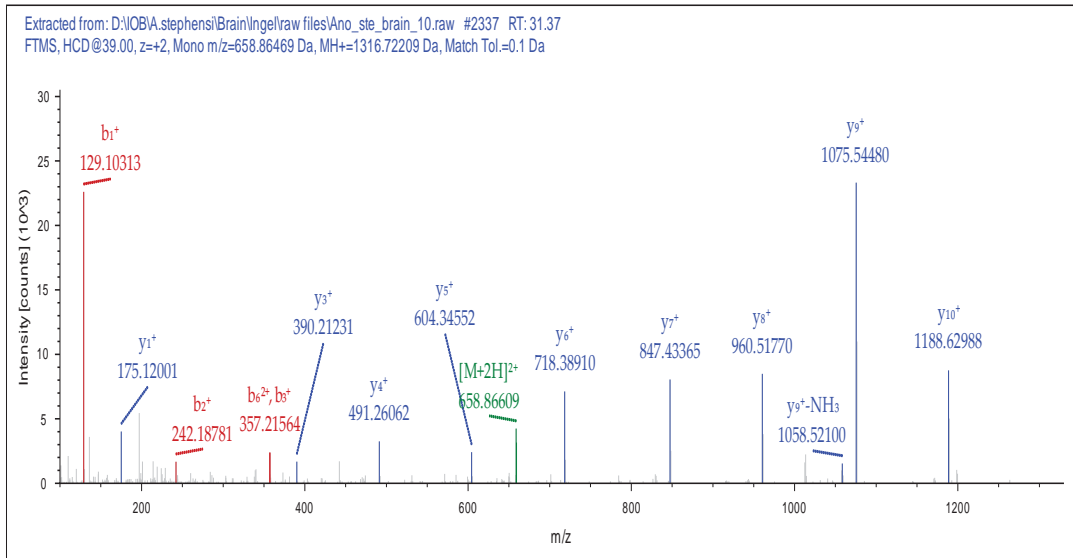

# LAGEFFTEDLLTPFFR

Extracted from: D:\VOBA\stephensi\Brain\Ingel\raw files\Ano\_ste\_brain\_10.raw #7804 RT:91.14  
FTMS, HCD@39.00, z=+2, Mono m/z=951.98309 Da, MH+=1902.95891 Da, Match Tol.=0.1 Da

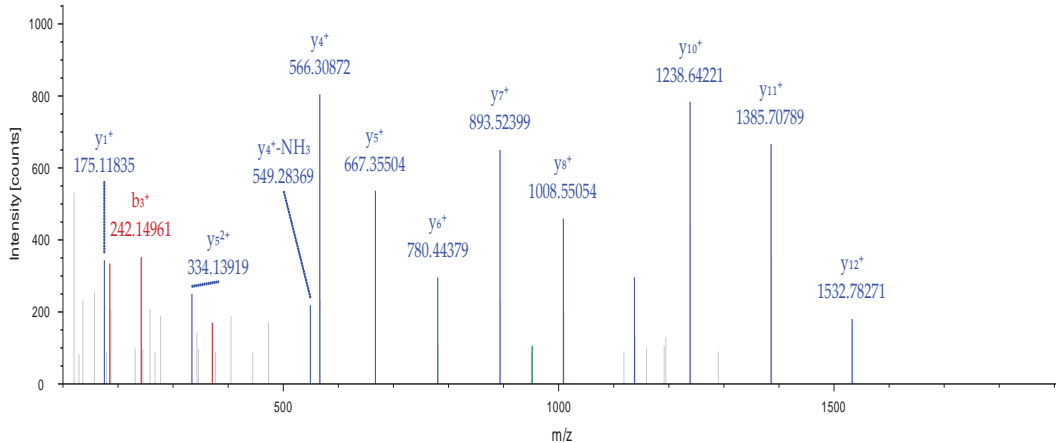

Extracted from: F:\Manish\Synthetic peptides\Raw files\SyntheticPep\_Pool2\_150207171656.raw #6014 RT:55.07  
FTMS, HCD@39.00, z=+2, Mono m/z=951.98840 Da, MH+=1902.96953 Da, Match Tol.=0.05 Da

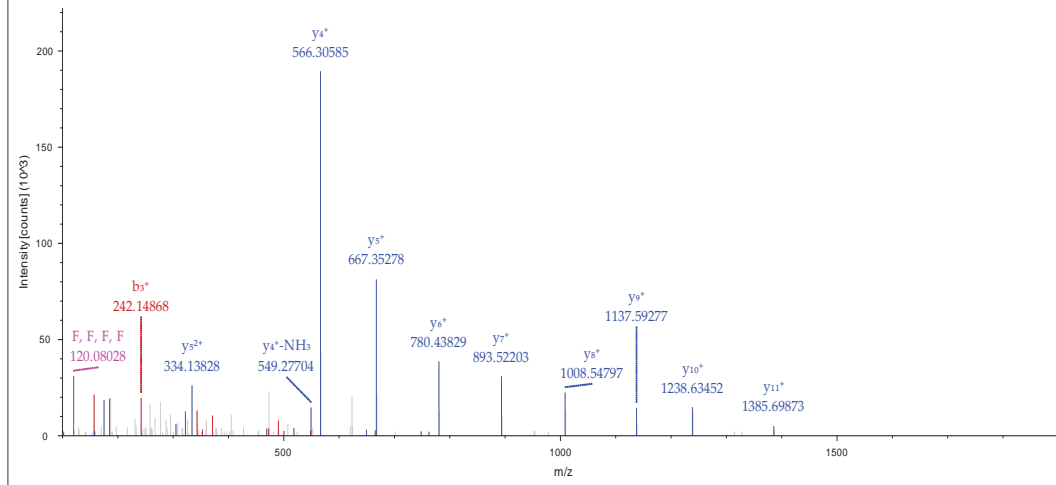

Experiment

Validated

# LGPSVLR

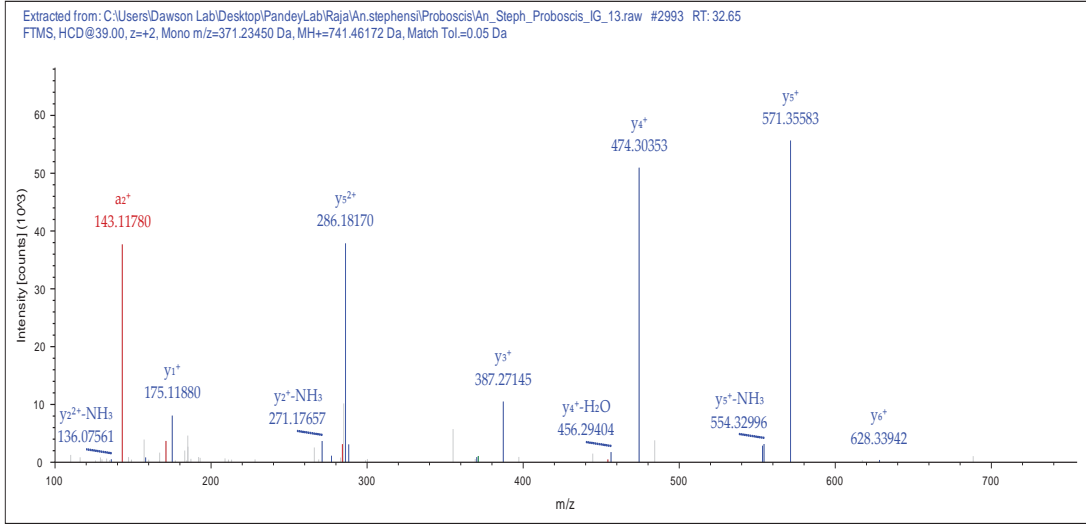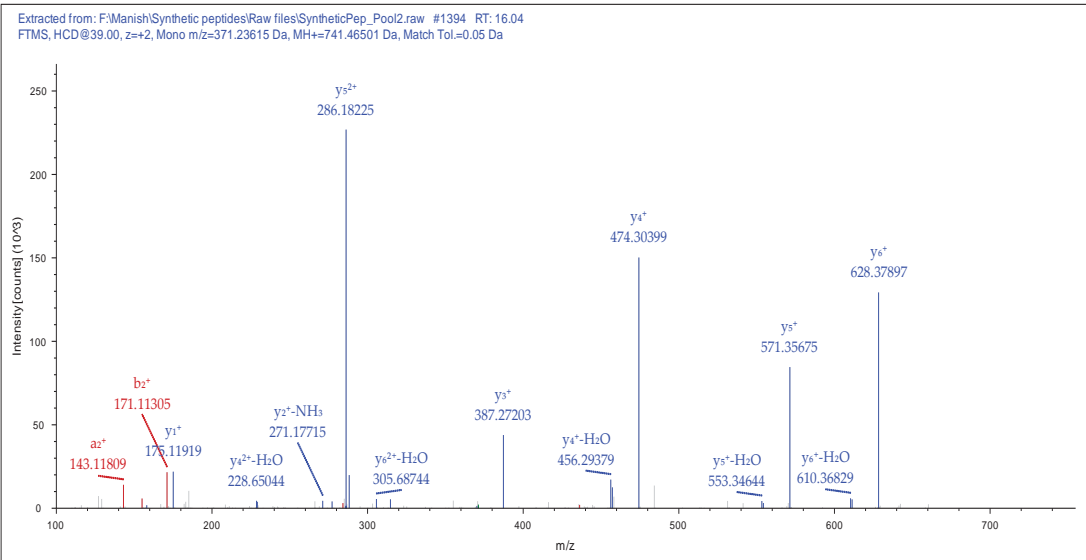

Experiment

Validated

# VQGGSVLHLVLALR

Experiment

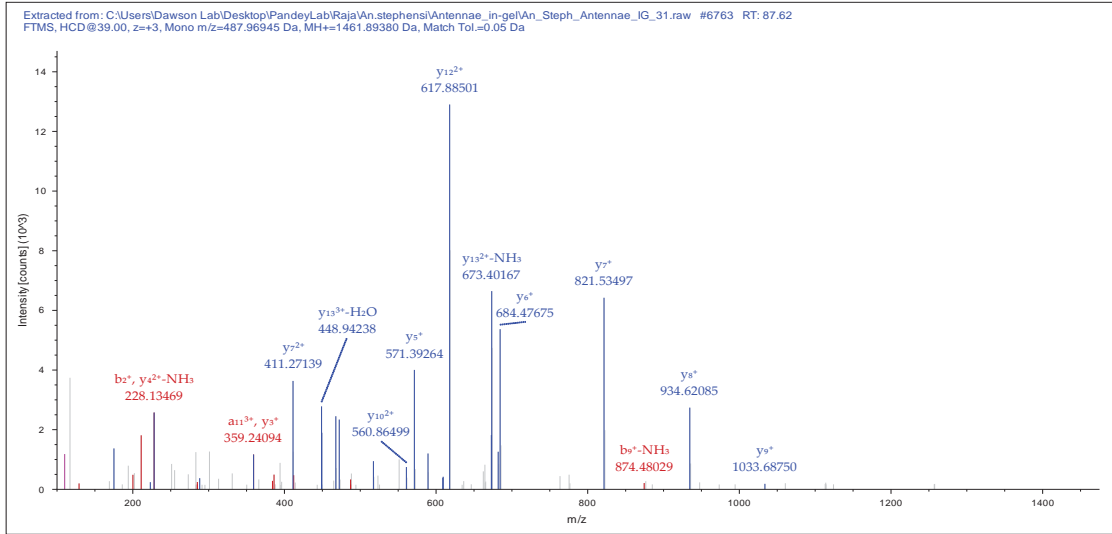

Validated

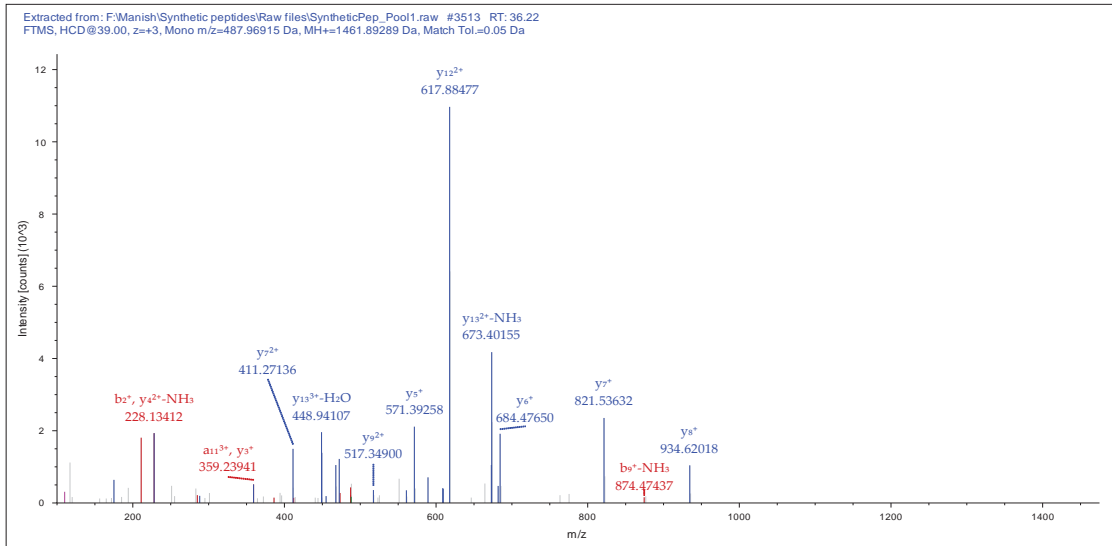

# LIGTNVGD LK

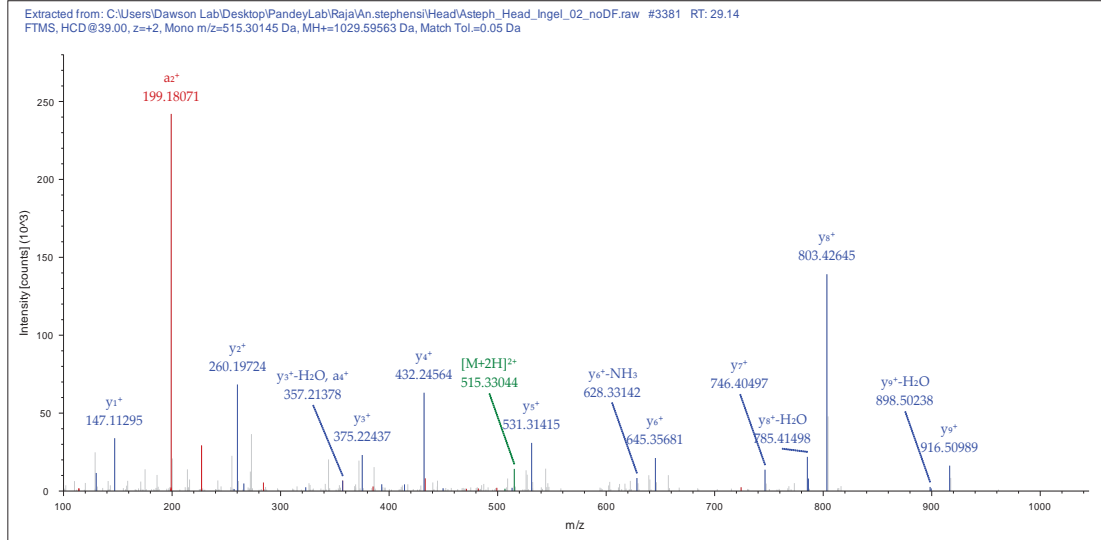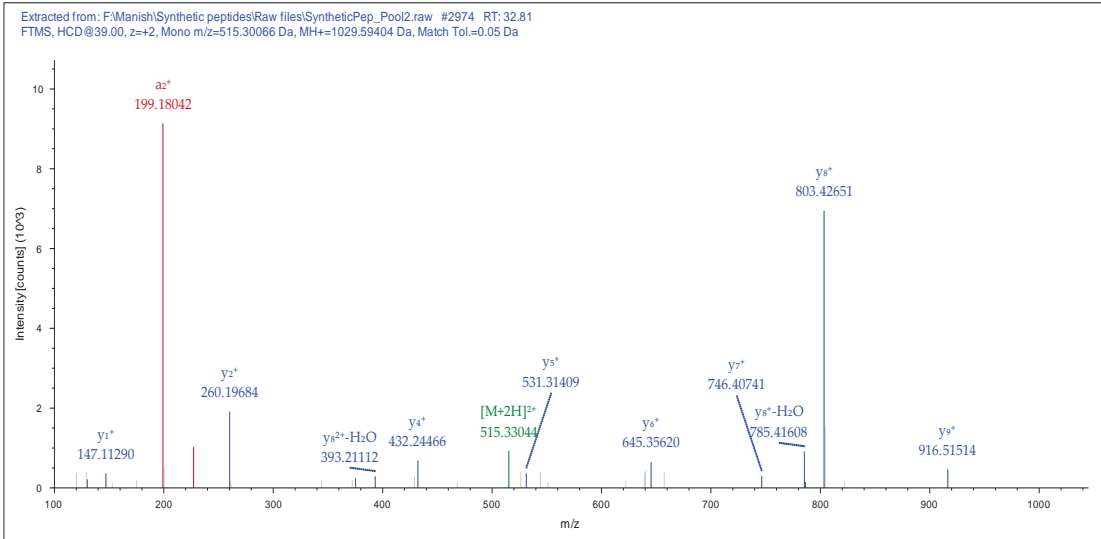

Experiment

Validated

# LINAIPR

Experiment

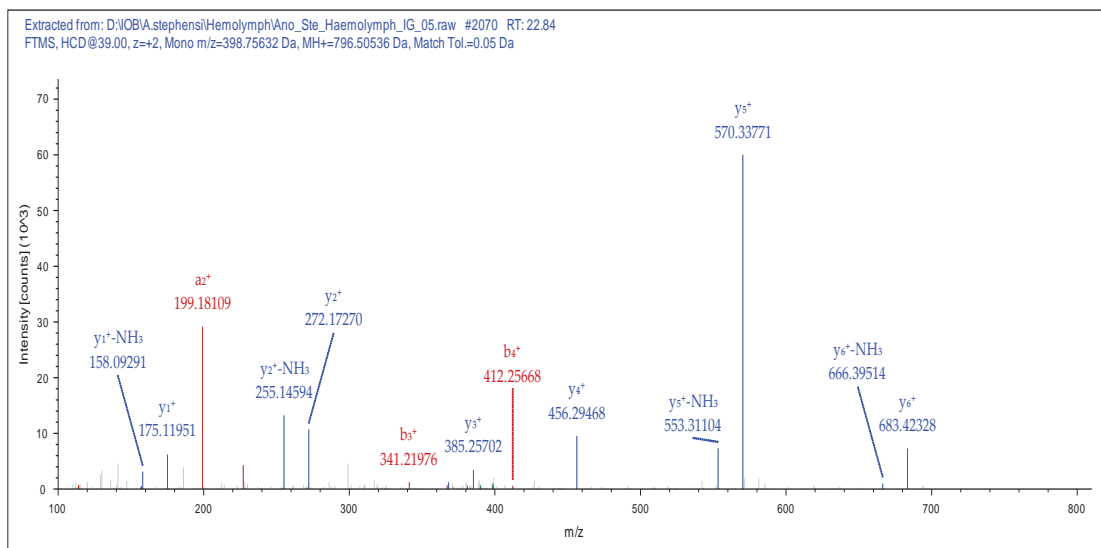

Validated

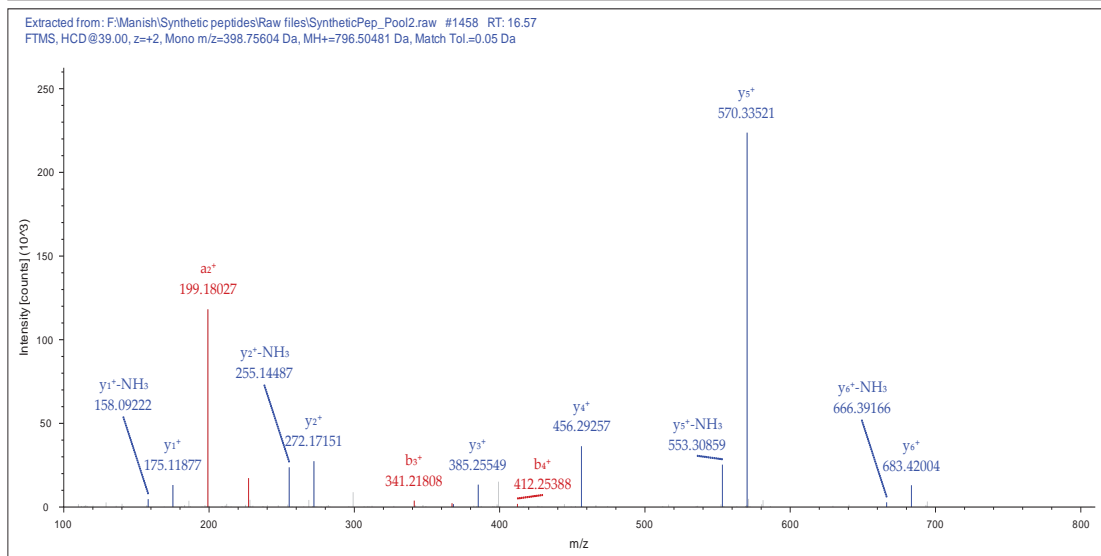

# LKPLEVDLKR

Experiment

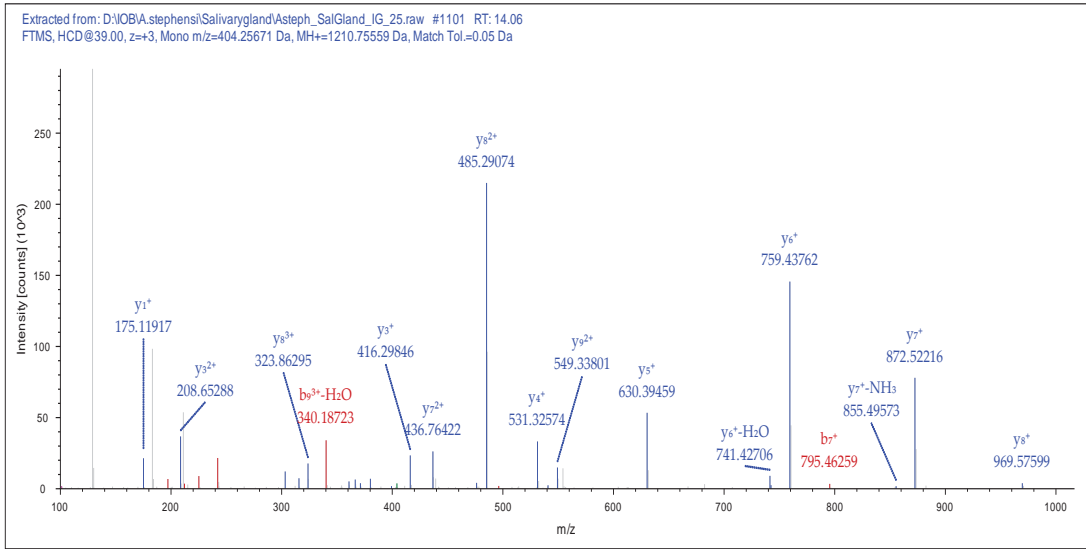

Validated

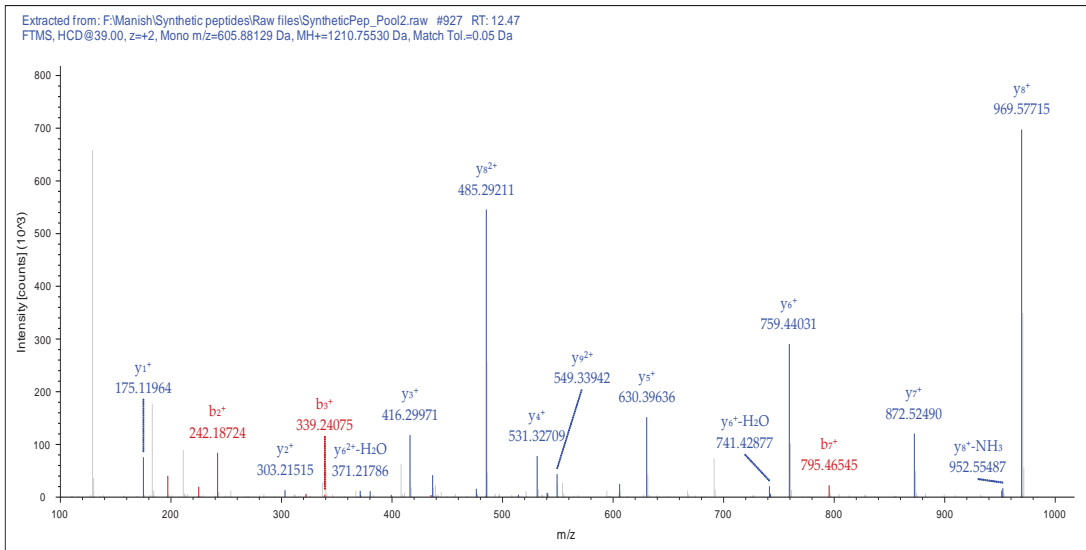

# LPVKDGQYSVLNDR

Experiment

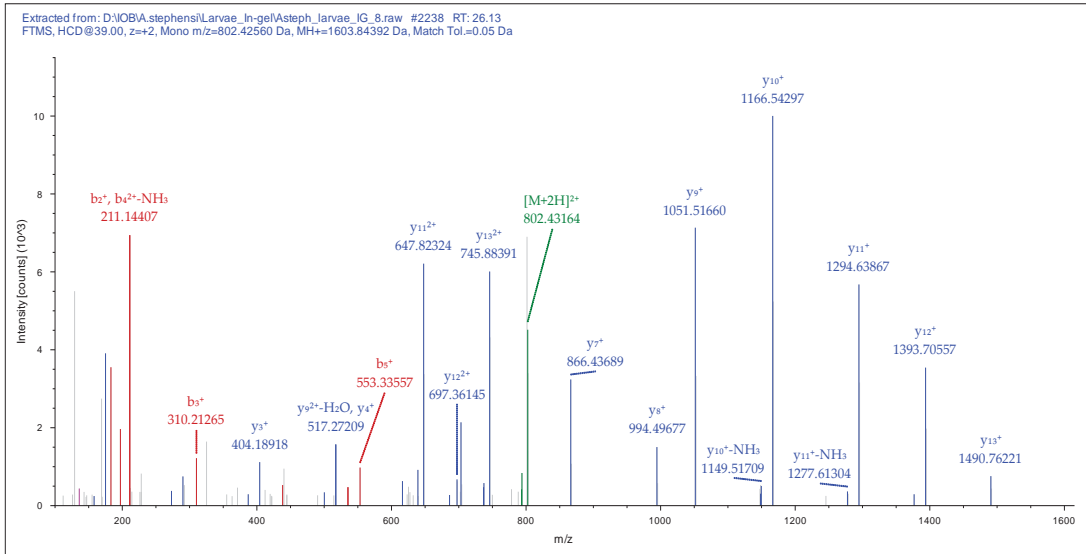

Validated

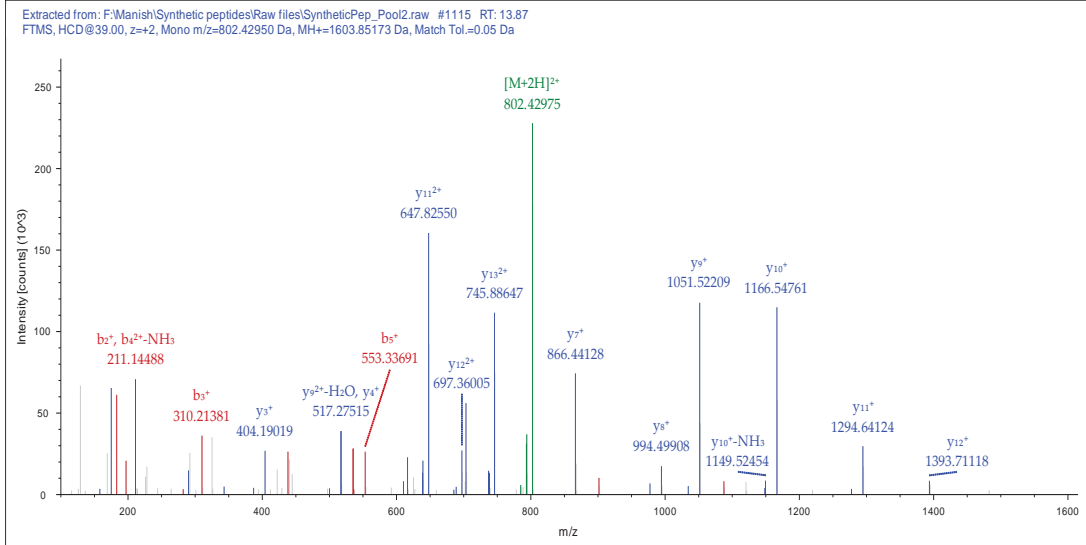



# LTSPATSPVGETGAVR

Experiment

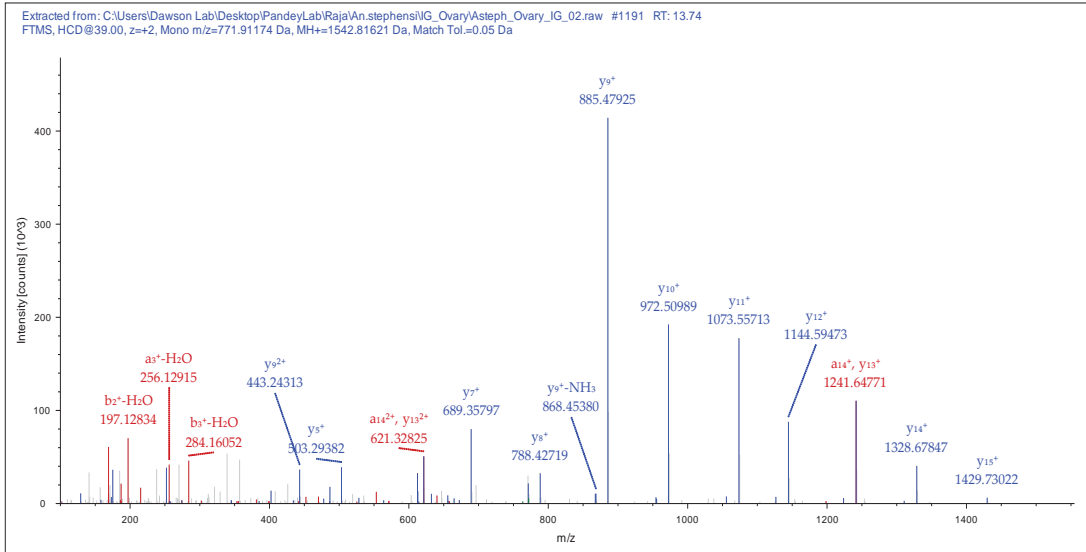

Validated

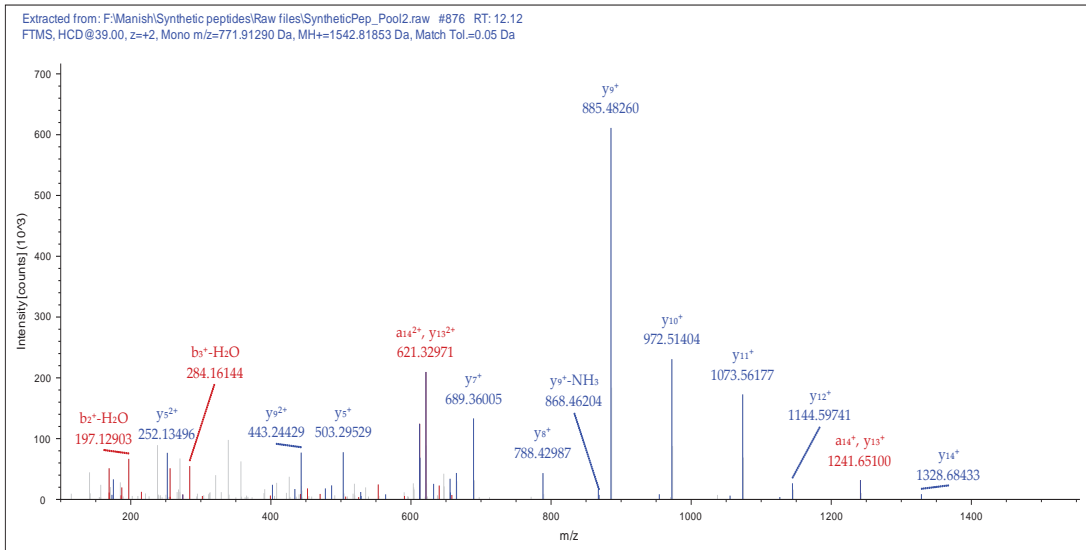

# LTVTDVR

Experiment

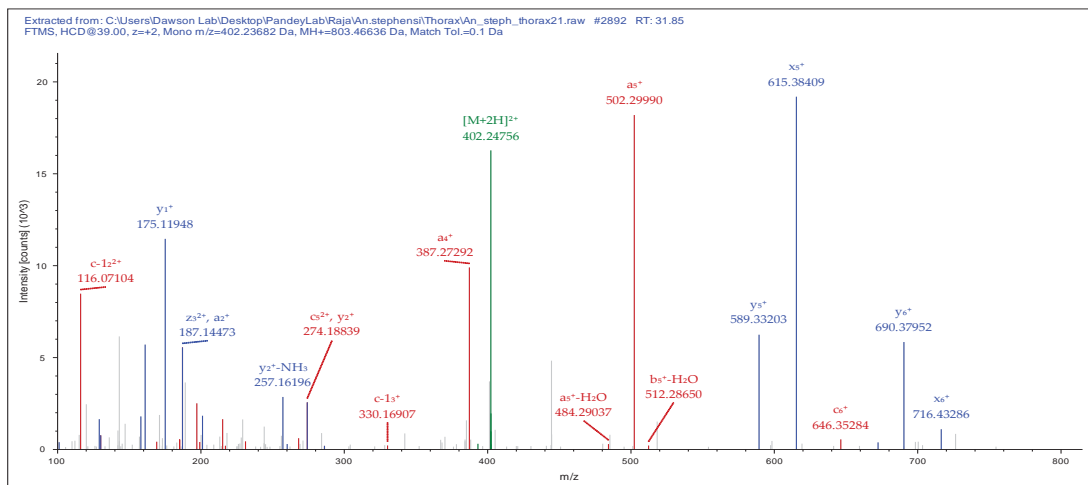

Validated

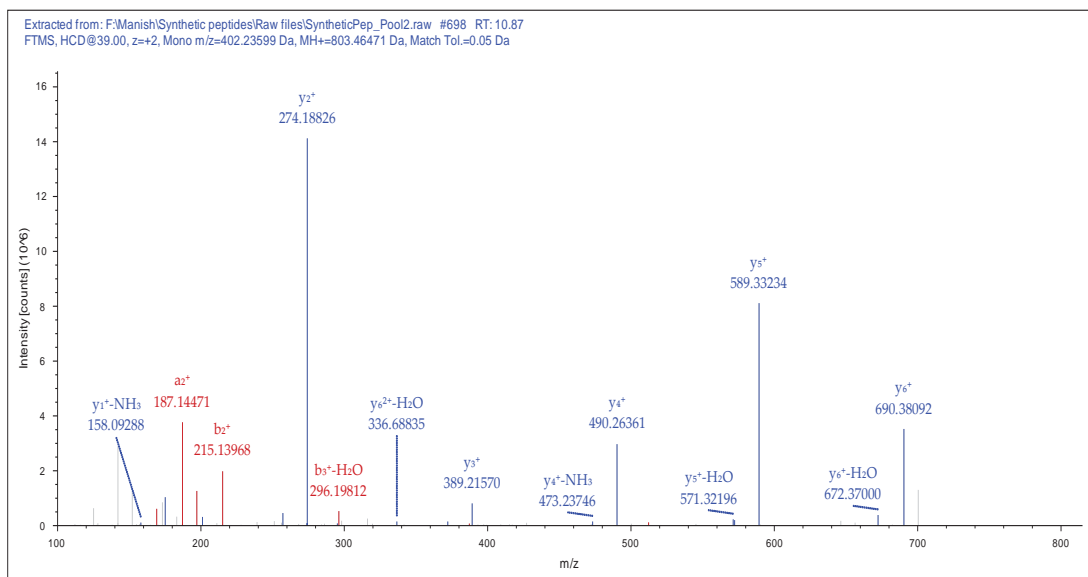

# LVVSGSSDNSIR

Experiment

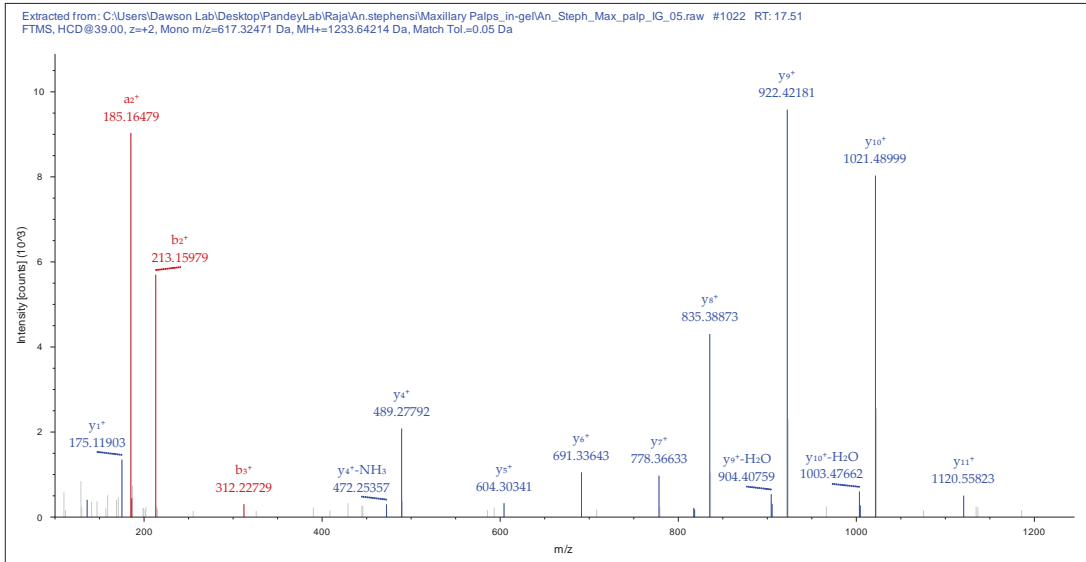

Validated

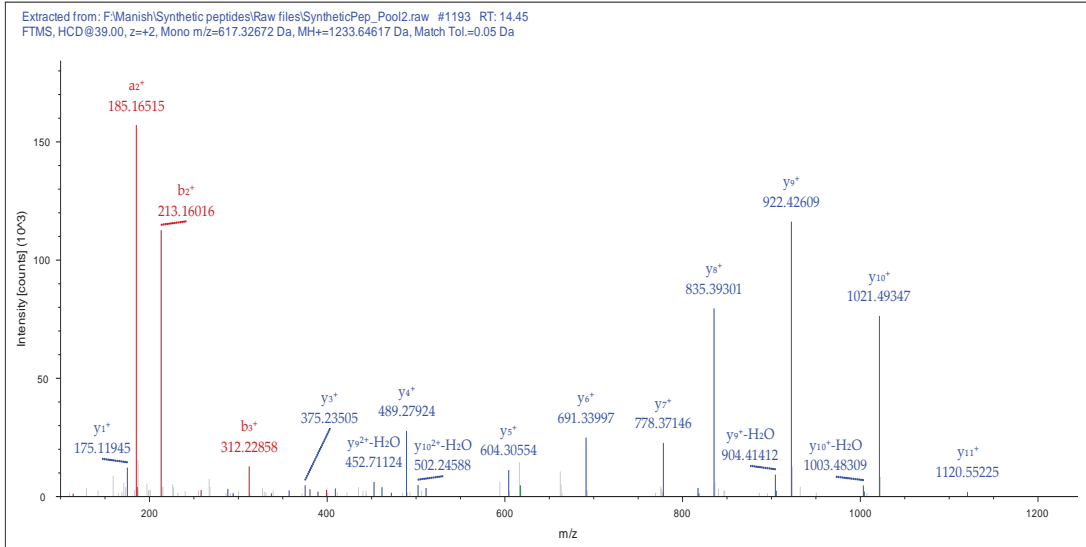

# NIPFESFFGR

Experiment

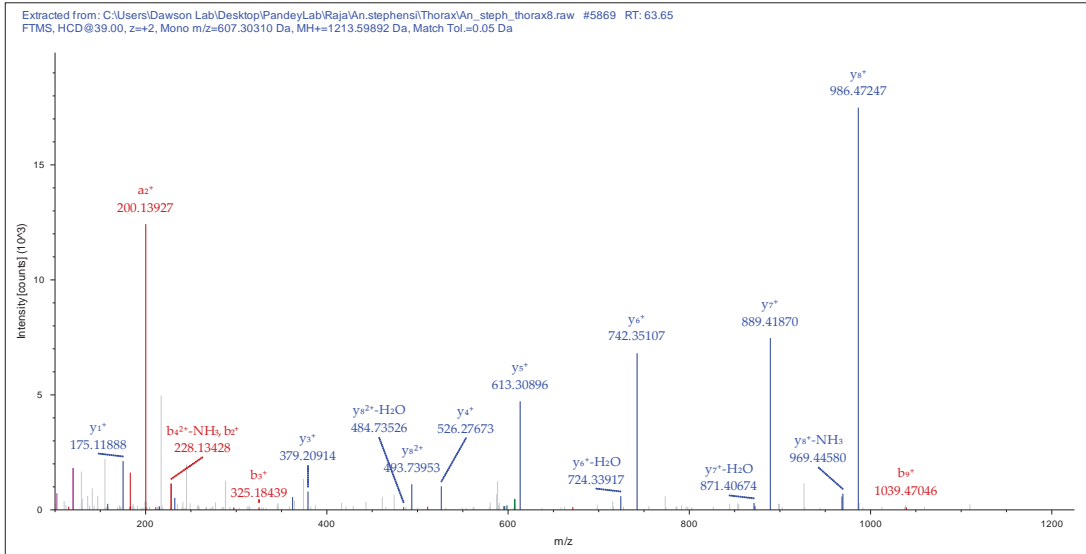

Validated

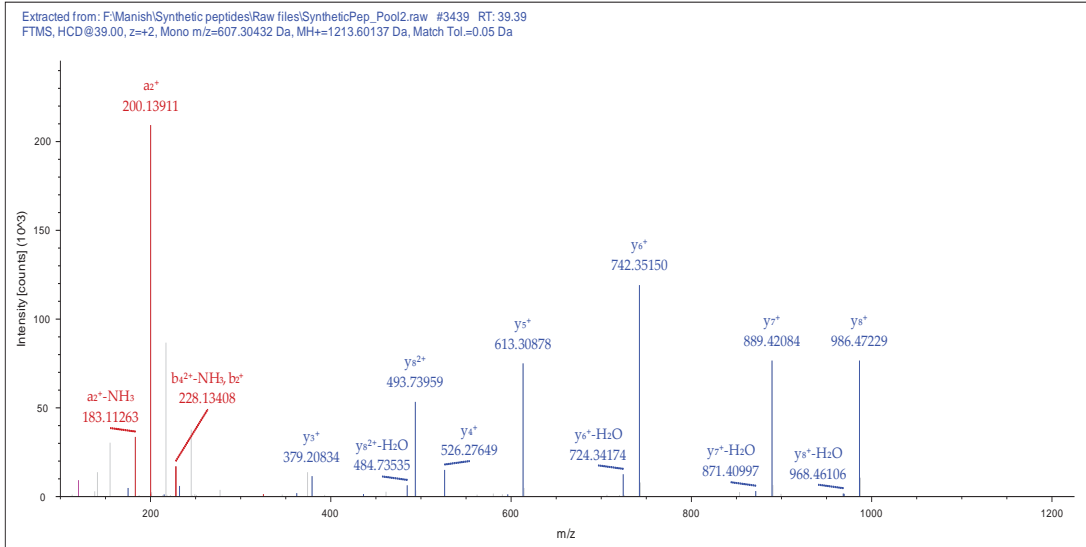

# NLLQVDLTK

Experiment

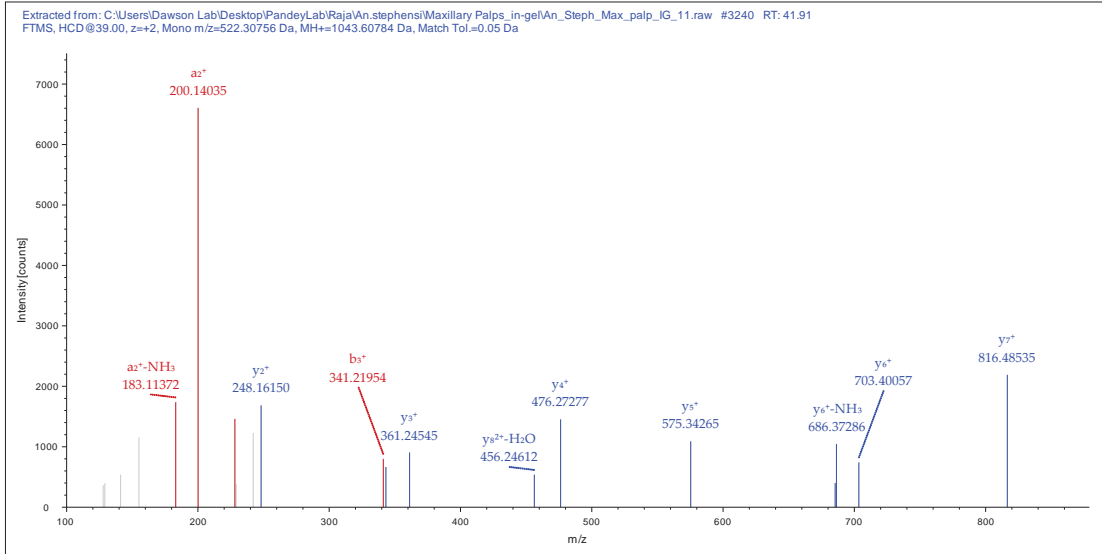

Validated

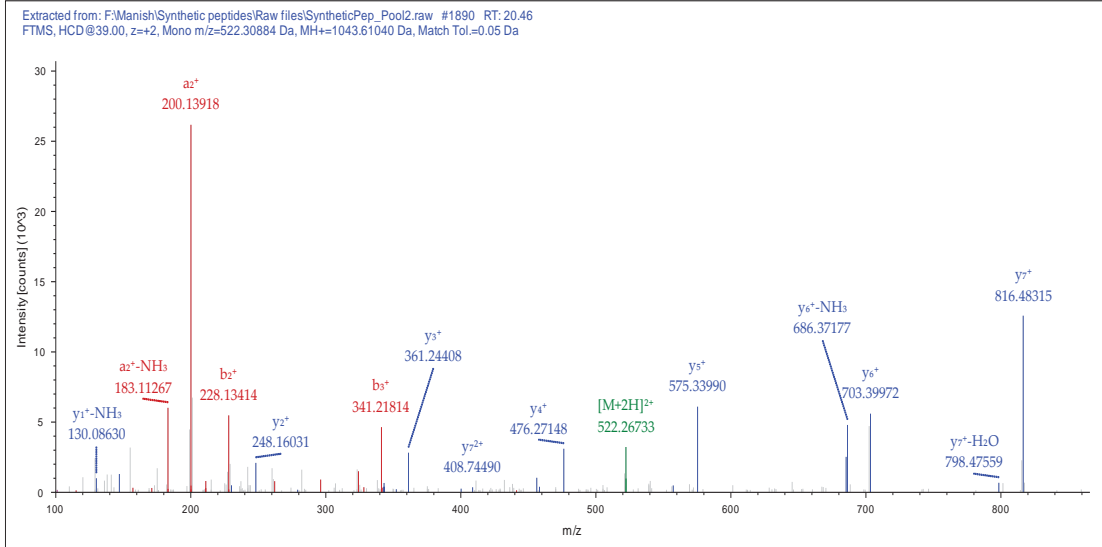

# NLLQVDLTKR

Experiment

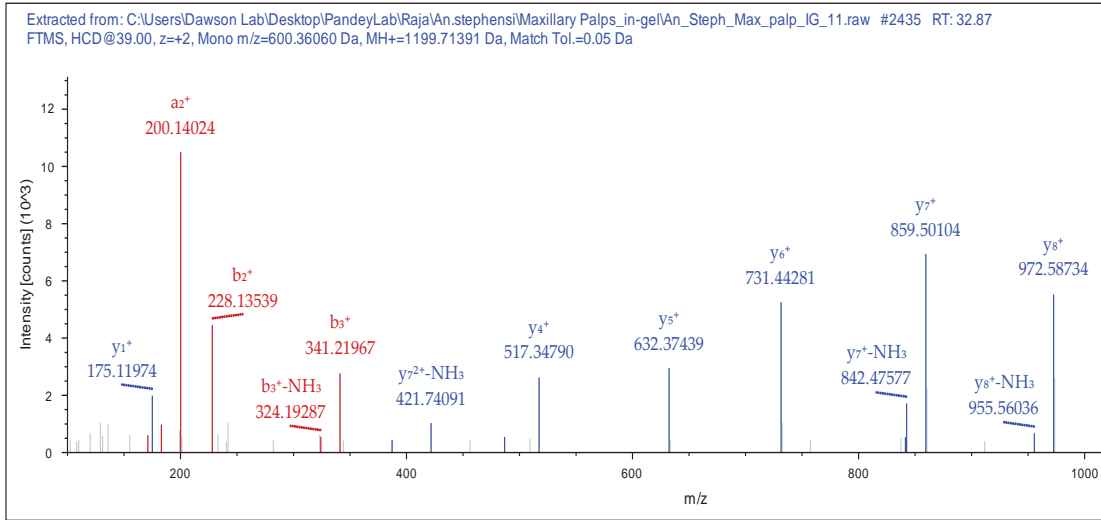

Validated

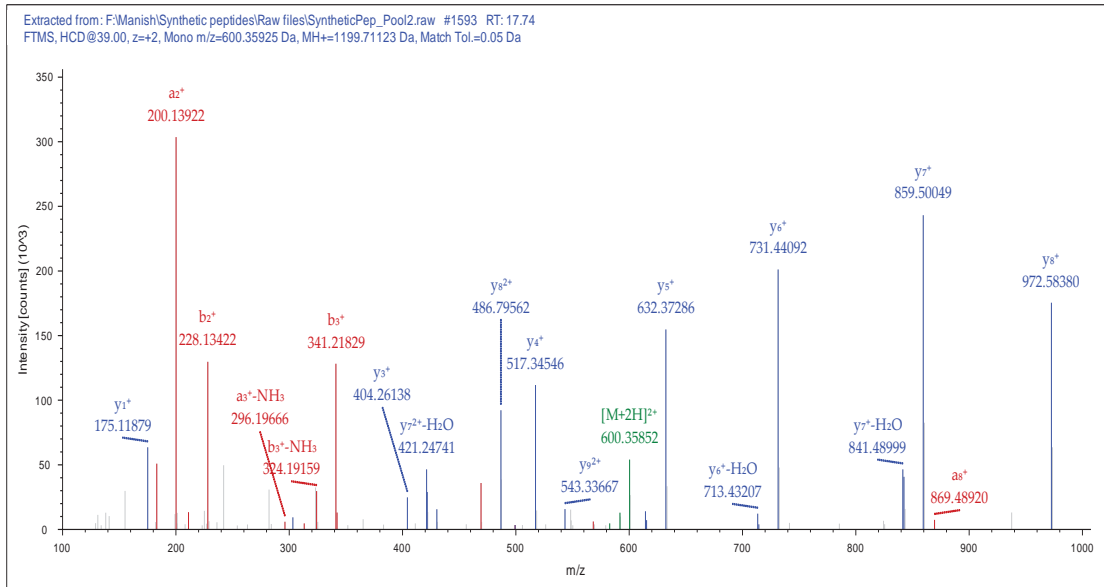

# QSIDTHIEIVR

Experiment

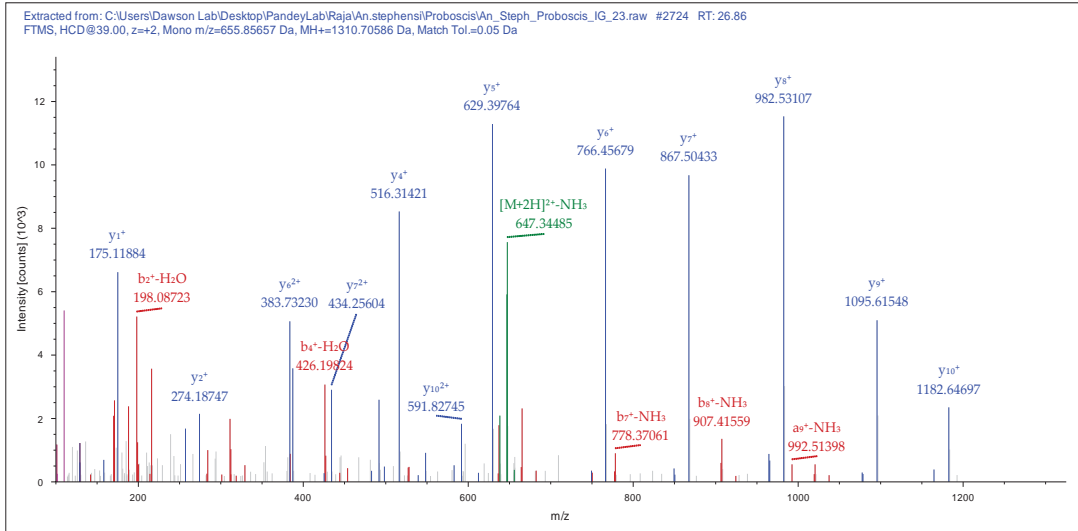

Validated

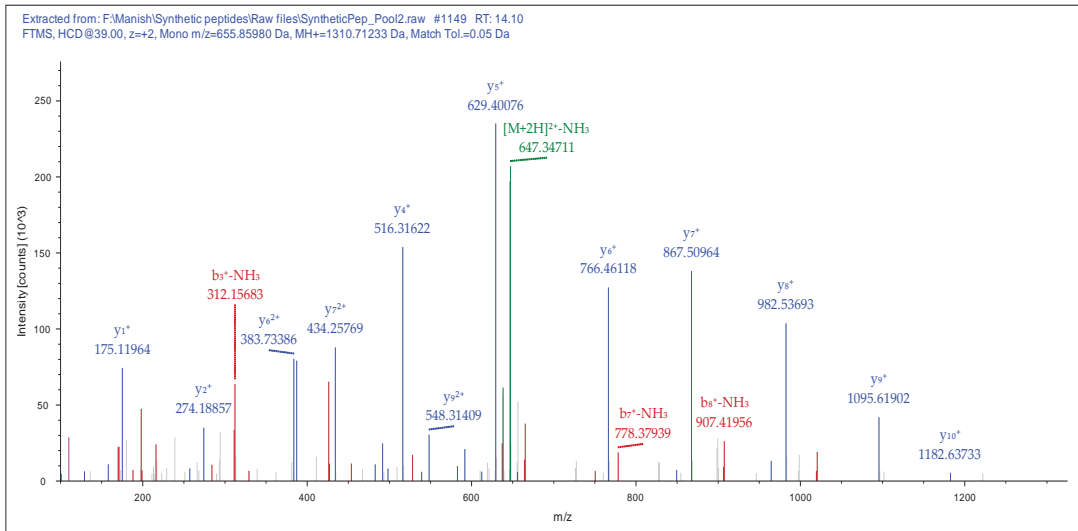

# SSLINALFR

Experiment

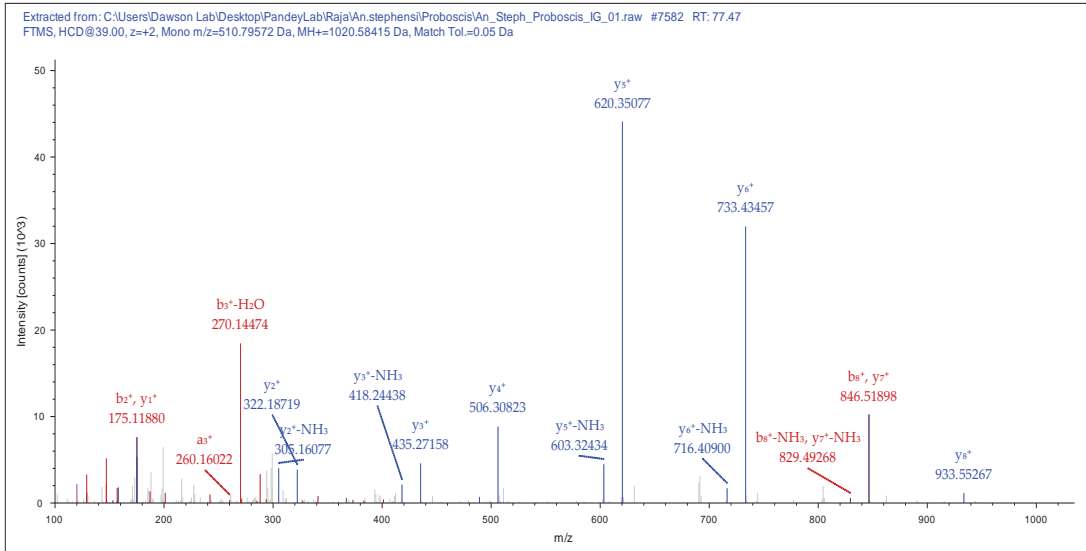

Validated

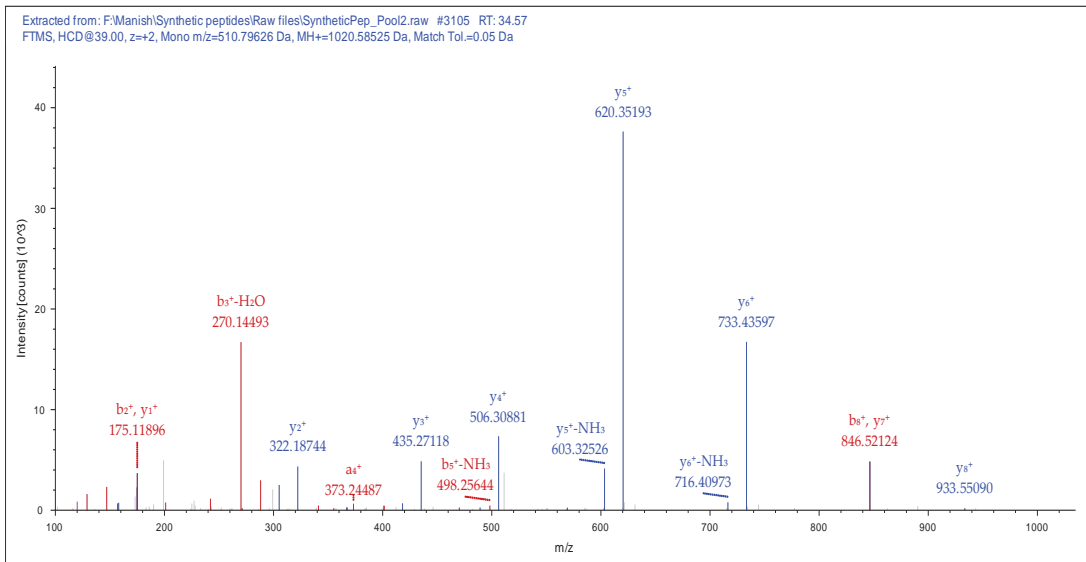



# INSLEEEKYDLEYVVKR

Experiment

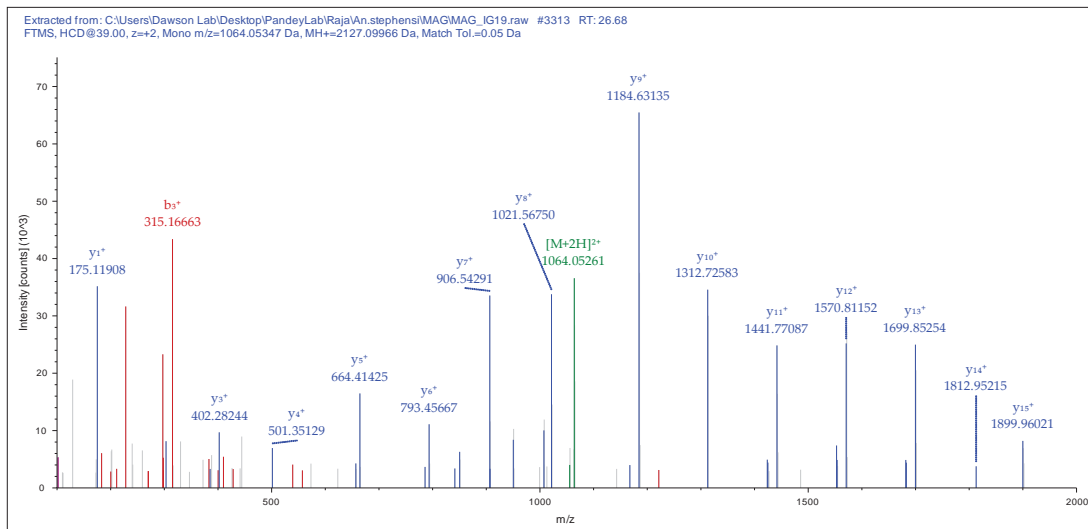

Validated

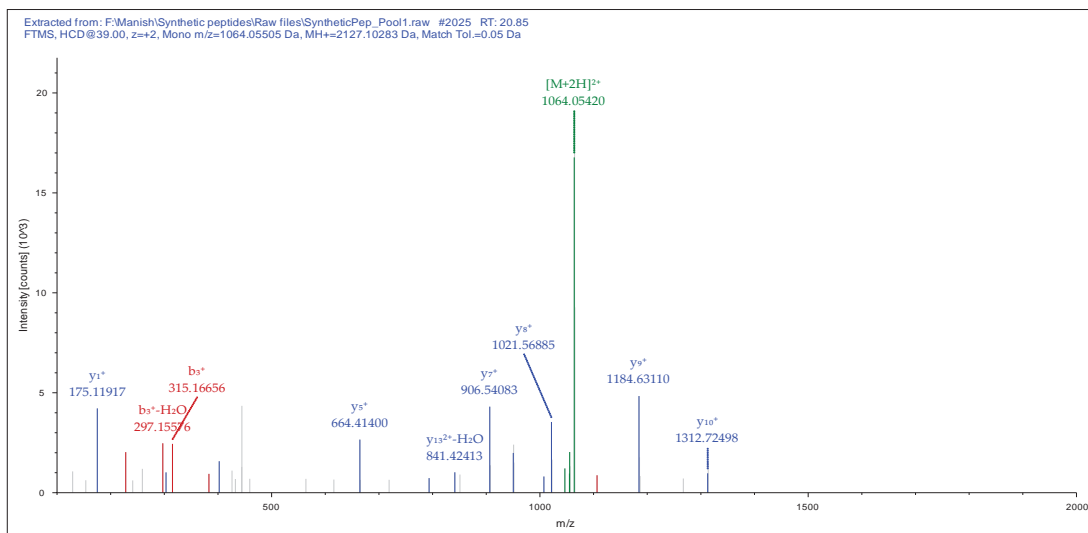

# STLEDLEERR

Experiment

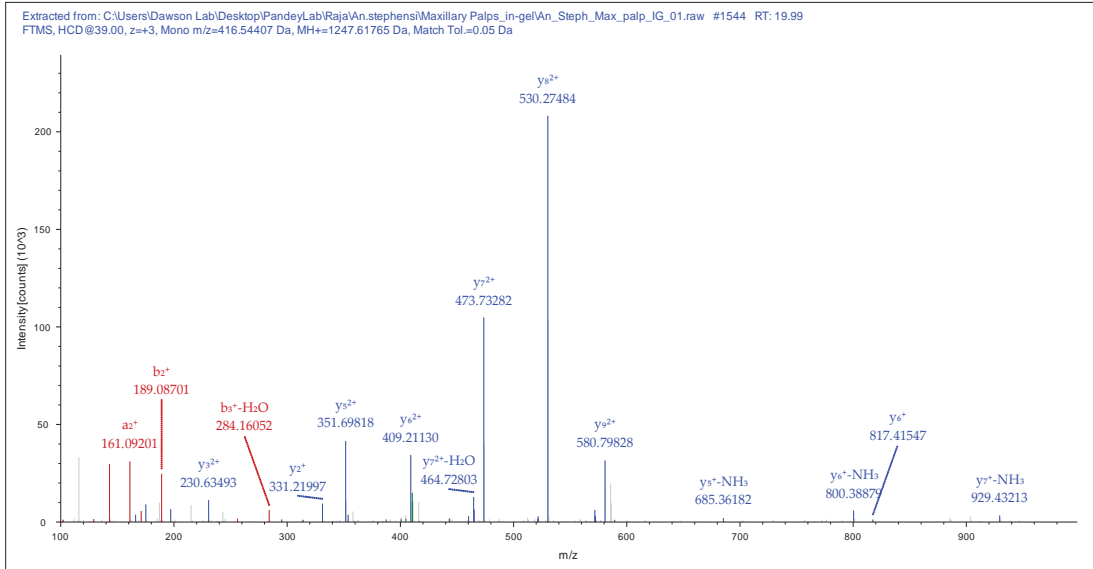

Validated

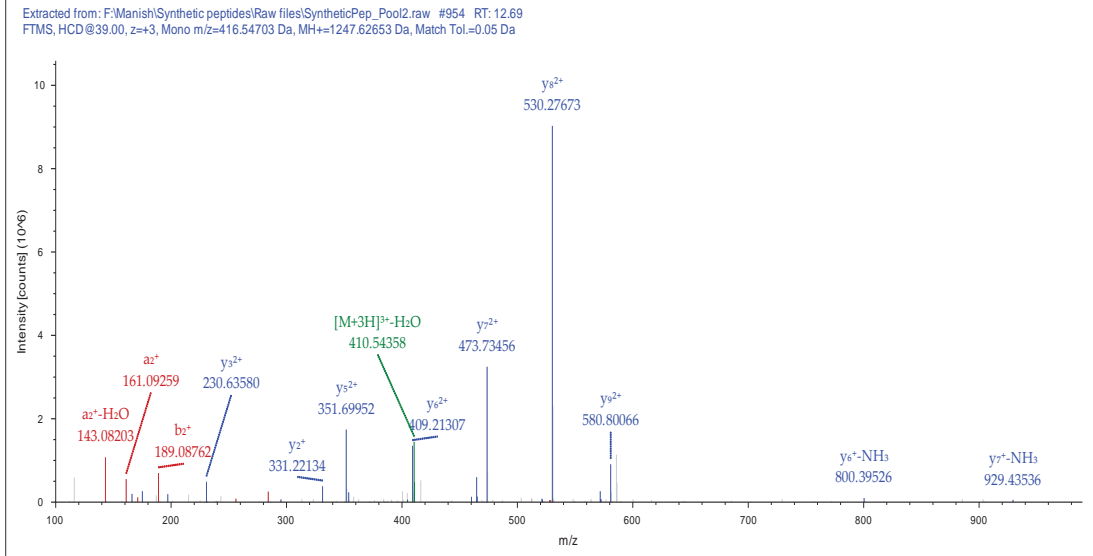

# TLVQPNSPHAYVR

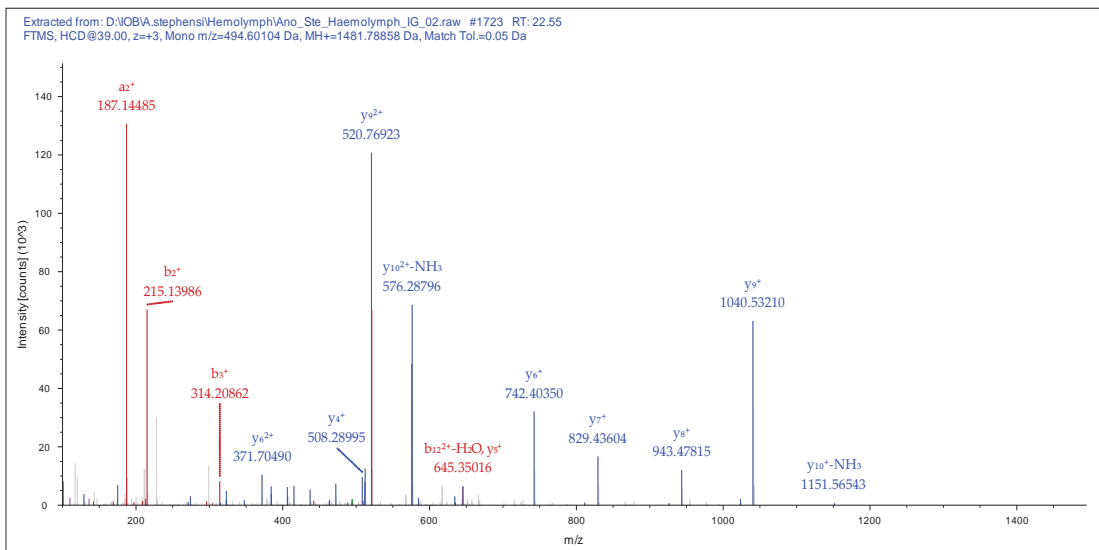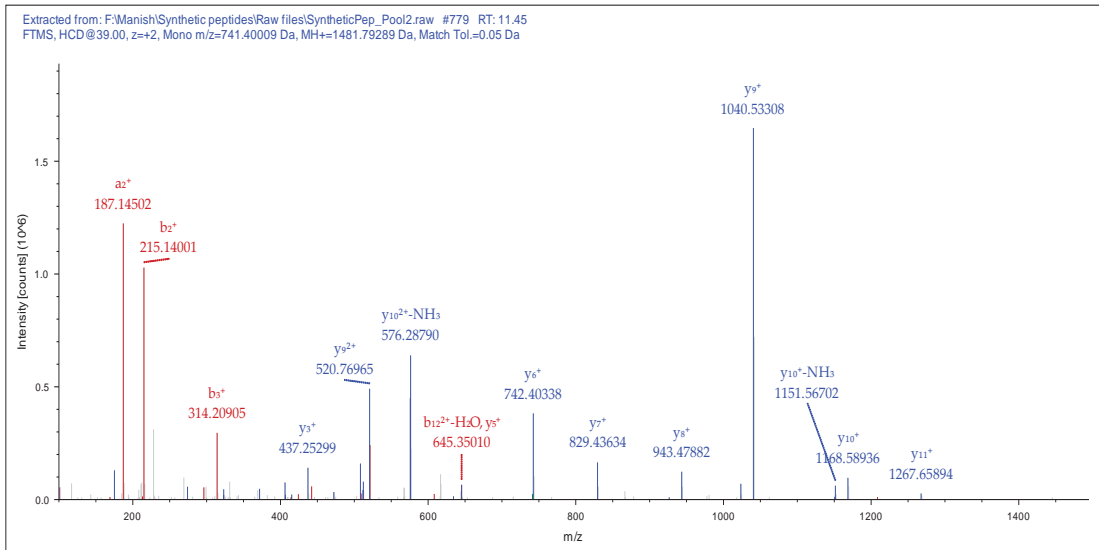

Experiment

Validated

# TSIILLQIGRPSK

Experiment

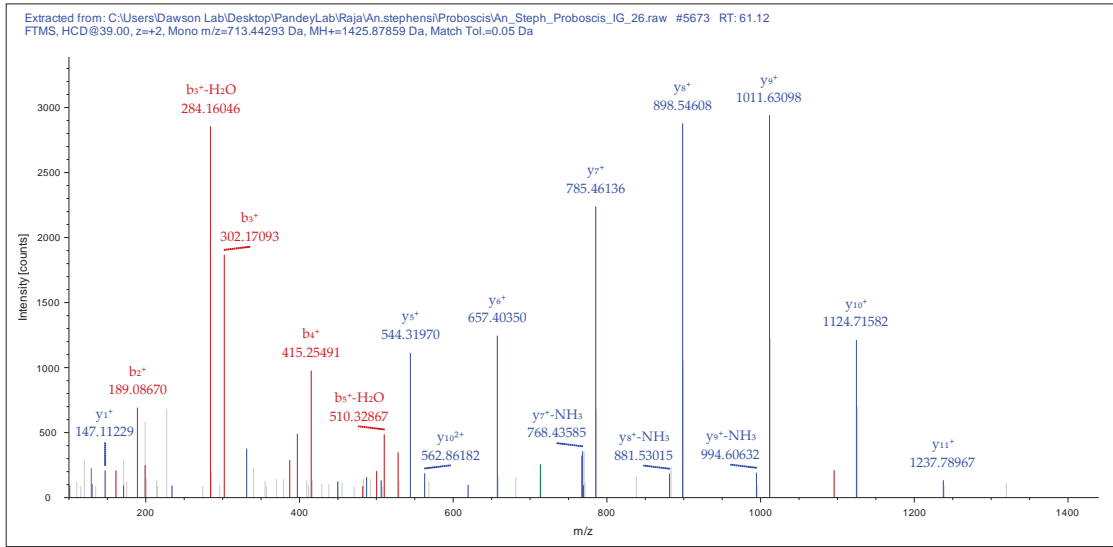

Validated

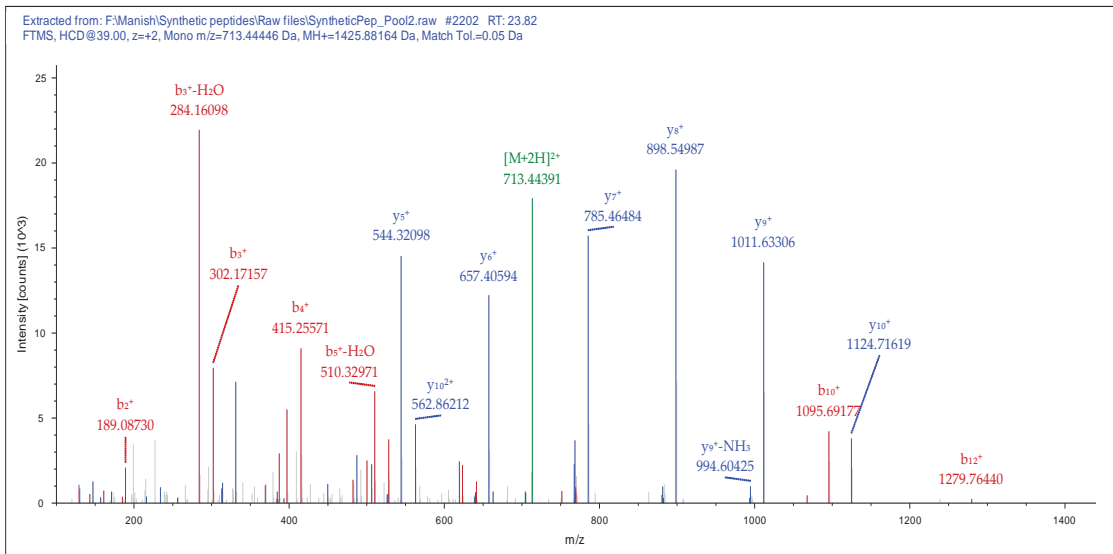

# TVTAISTESATNTEAK

Experiment

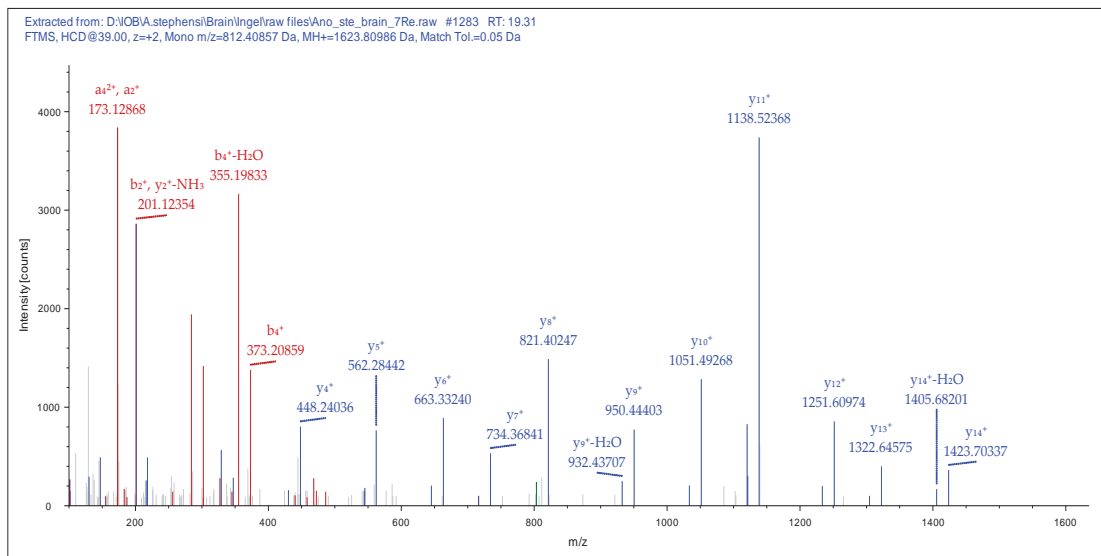

Validated

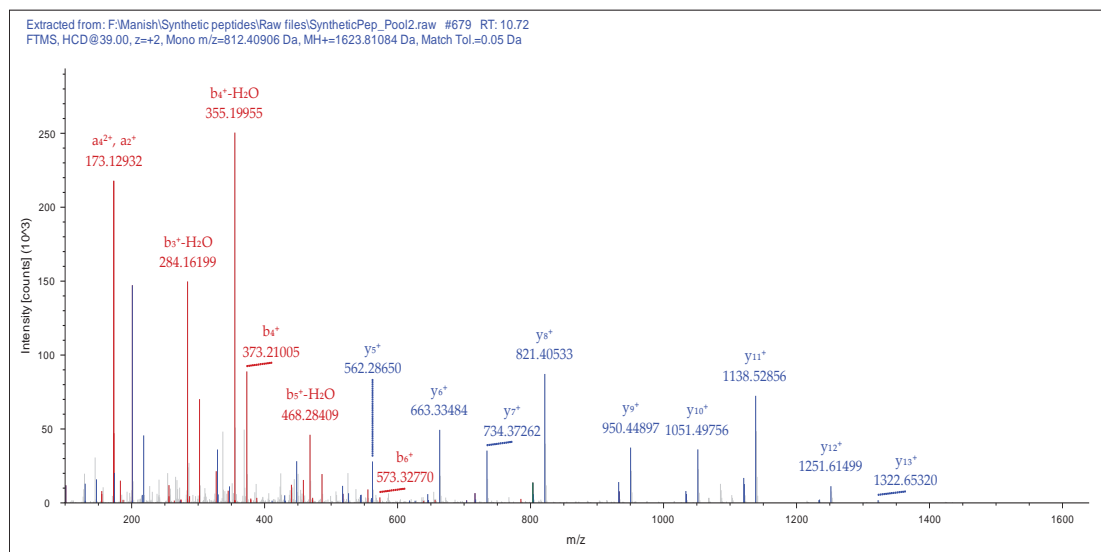

# GVGAIPPPPQR

Experiment

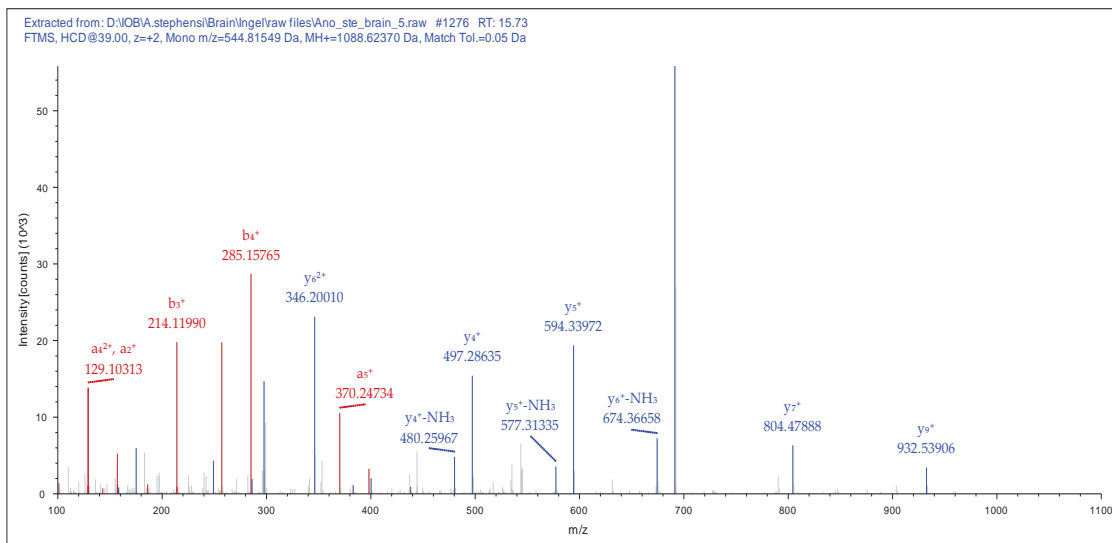

Validated

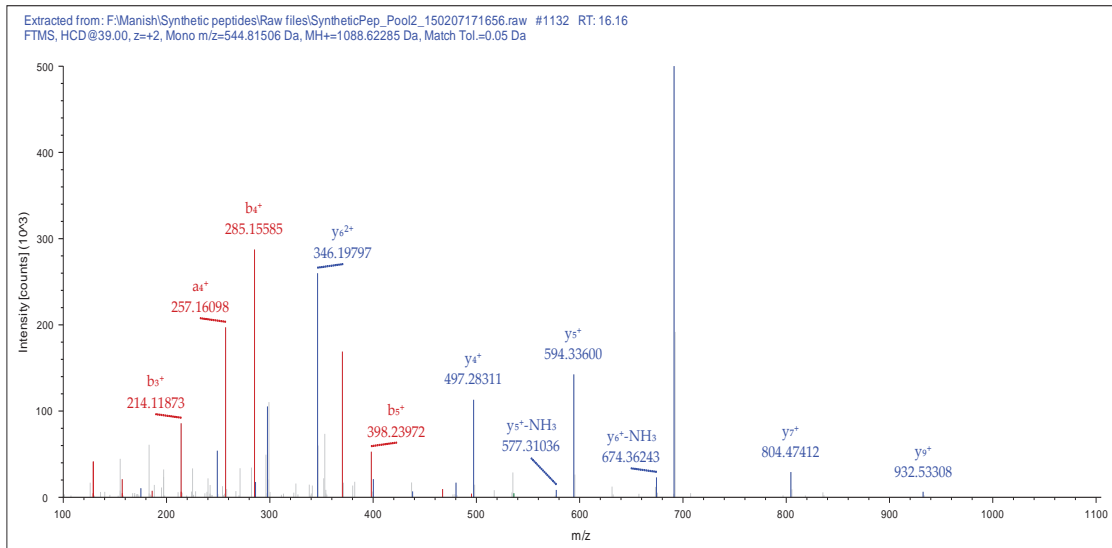

# STLHASGLLSHR

Experiment

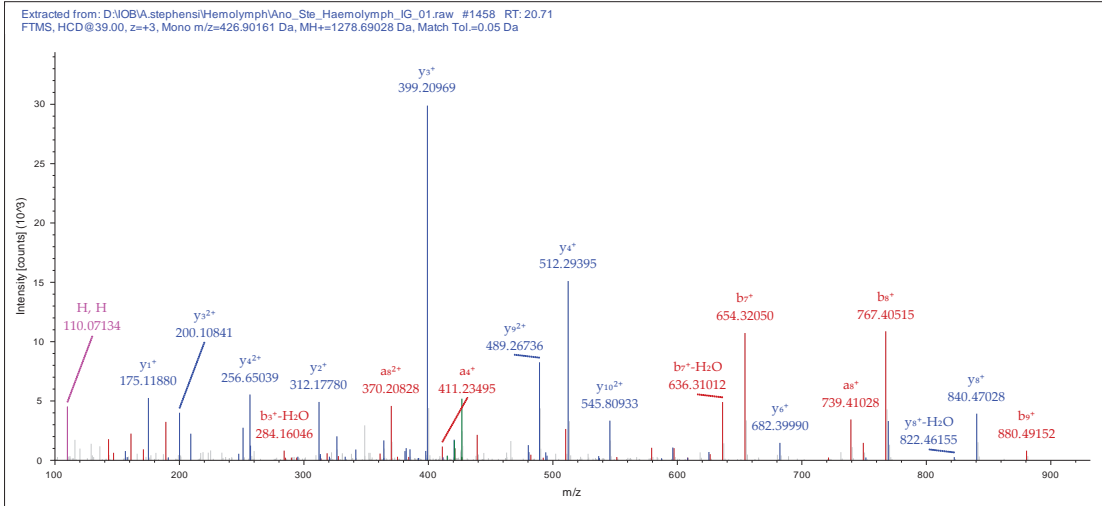

Validated

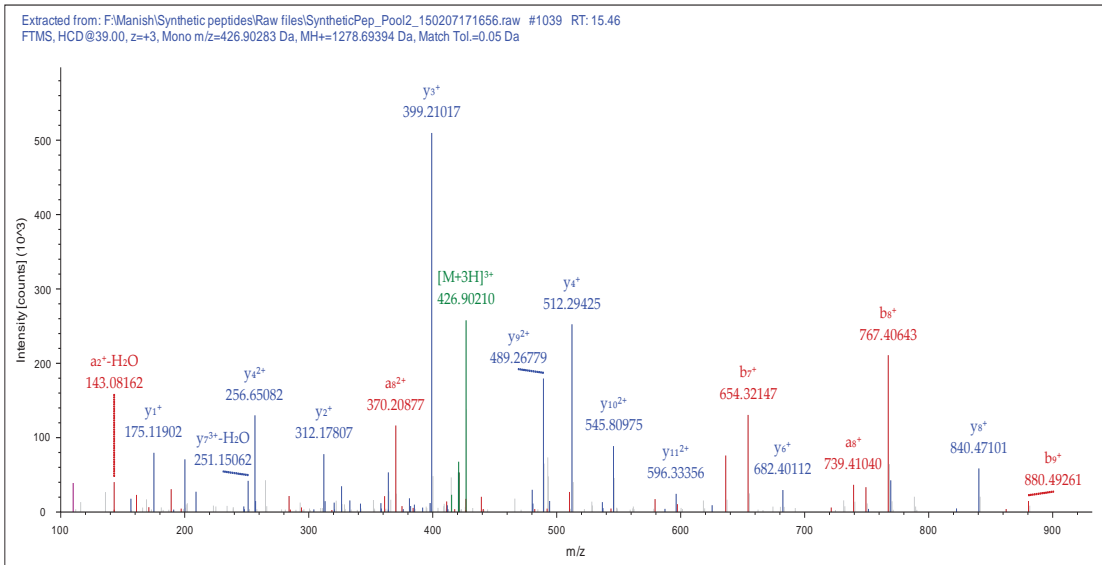

# TYGADPDHHLDYR

Experiment

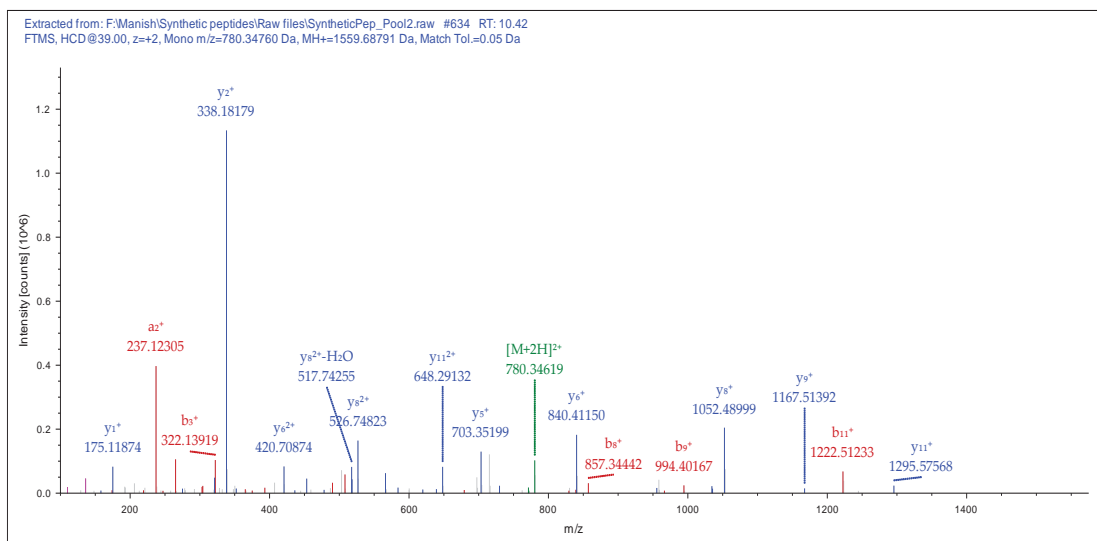

Validated

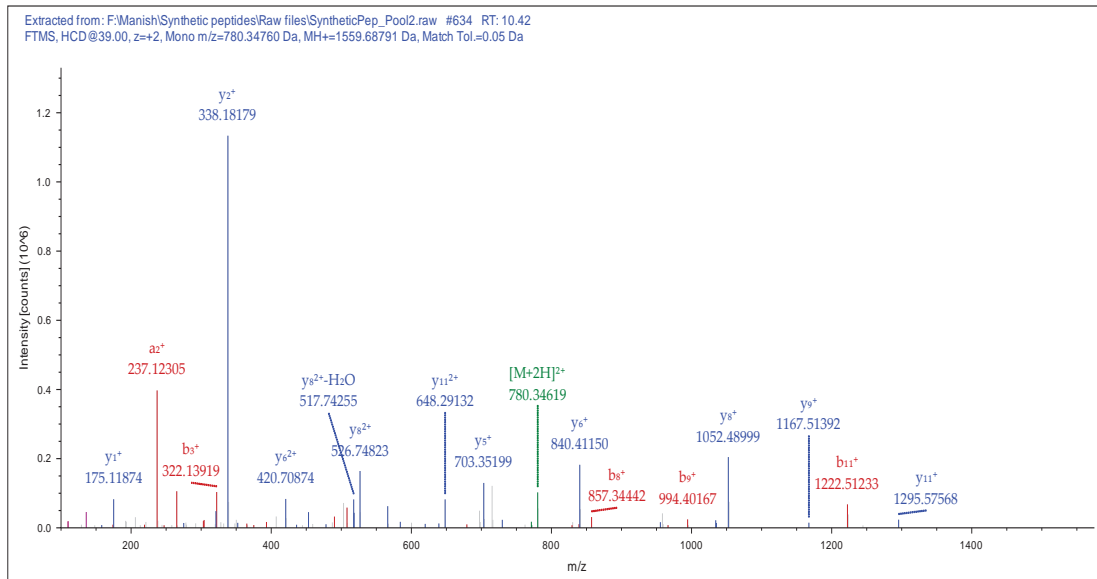



# VALPLAR

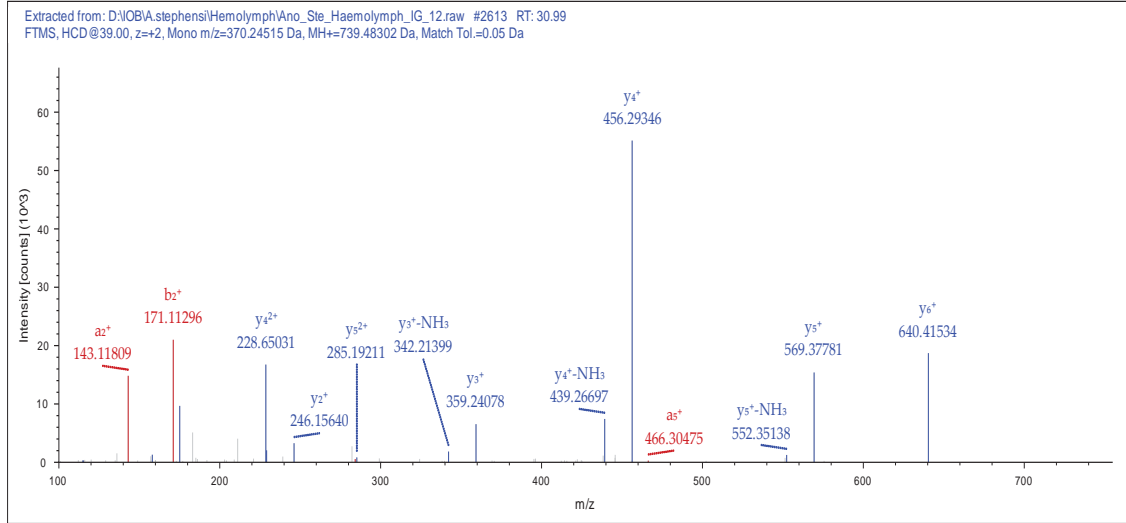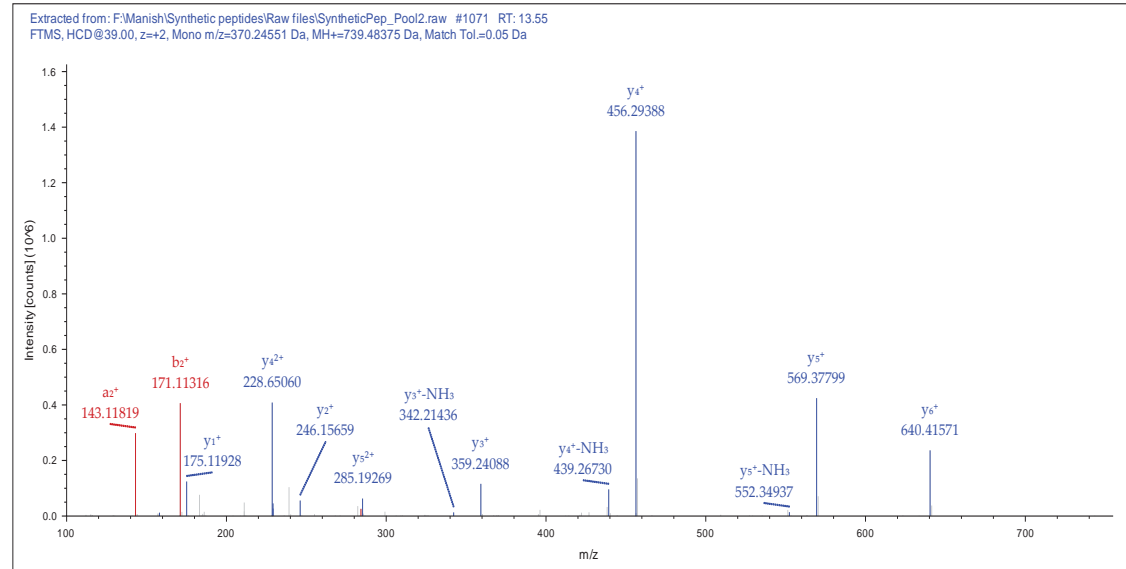

Experiment

Validated

# VGFNGLLQPFSDAVK

Experiment

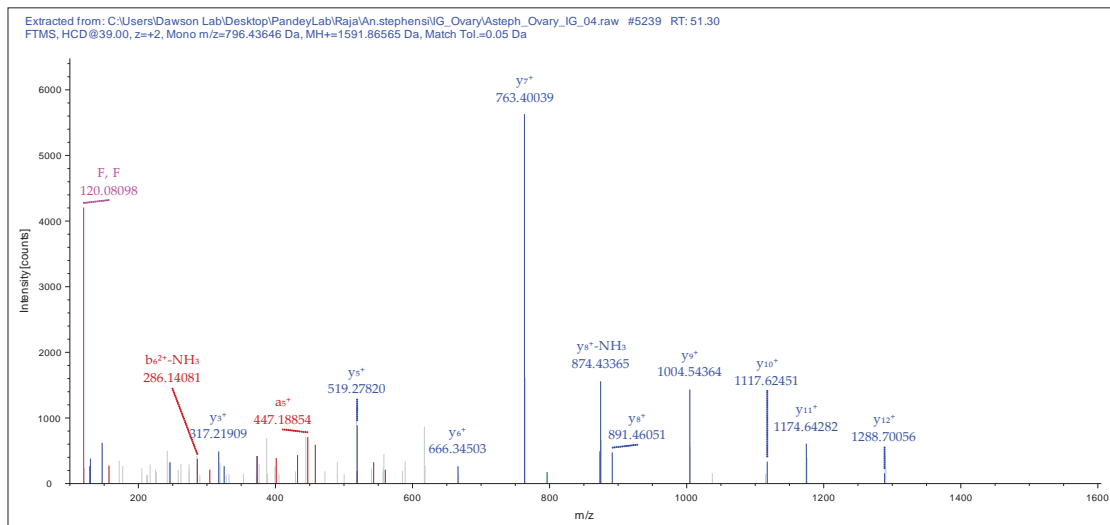

Validated

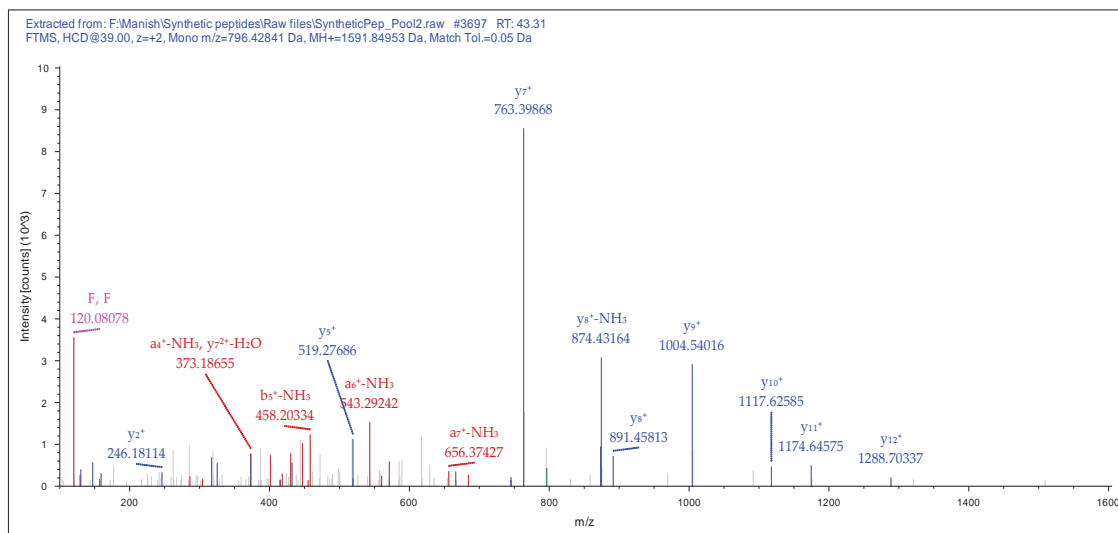

# VISFADWIQR

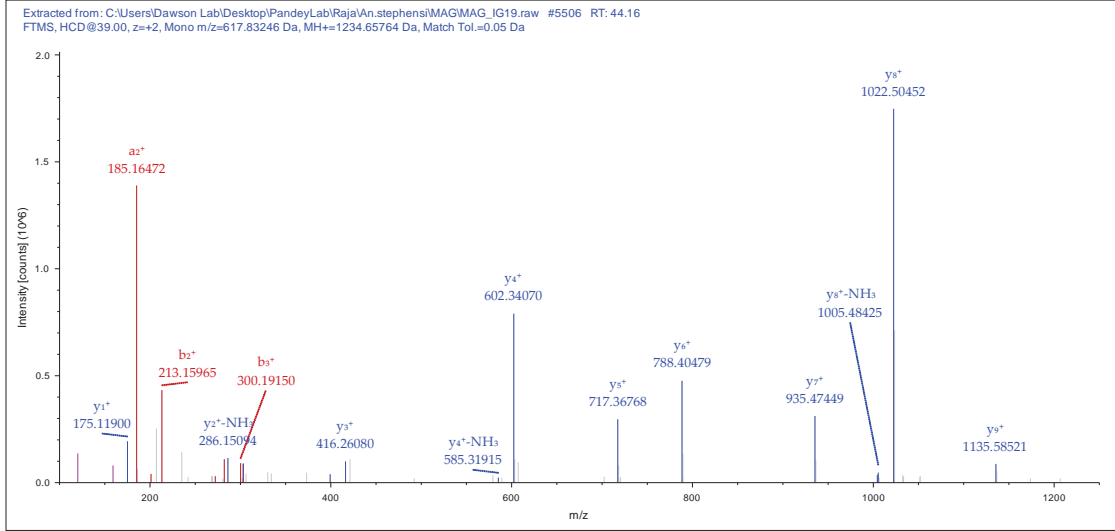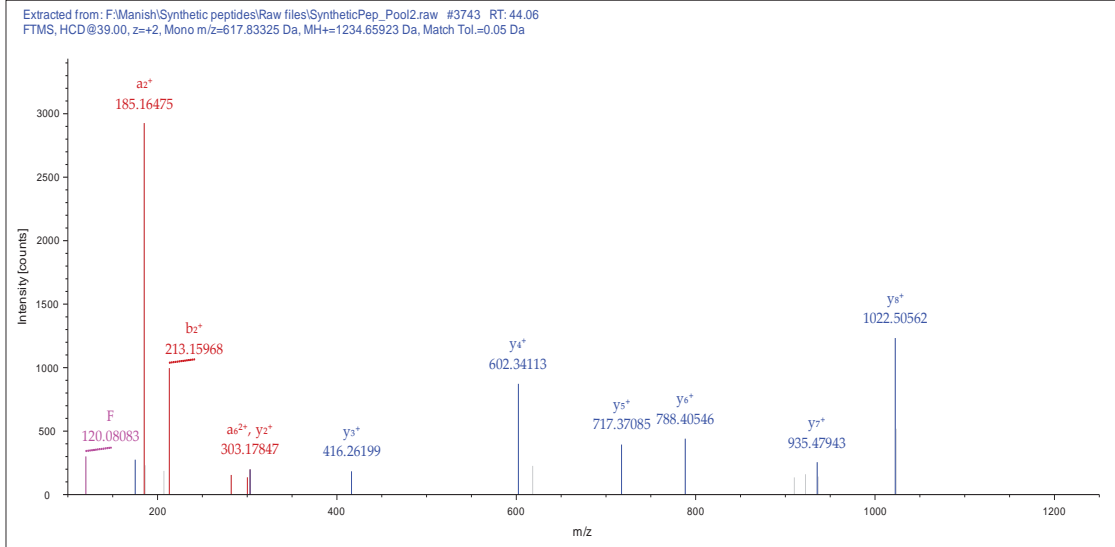

Experiment

Validated

# VLEGTVVAVGPGAR

Experiment

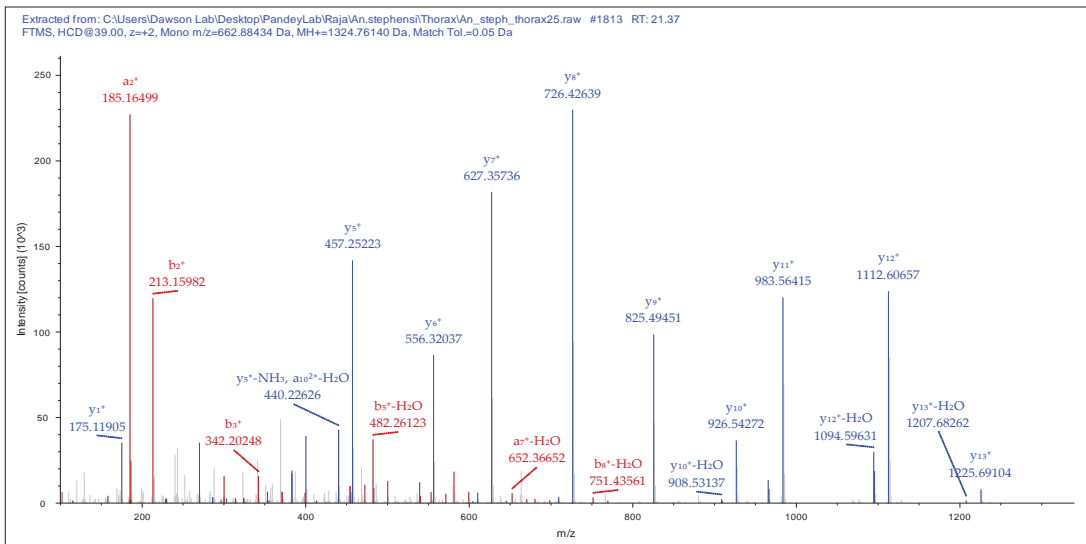

Validated

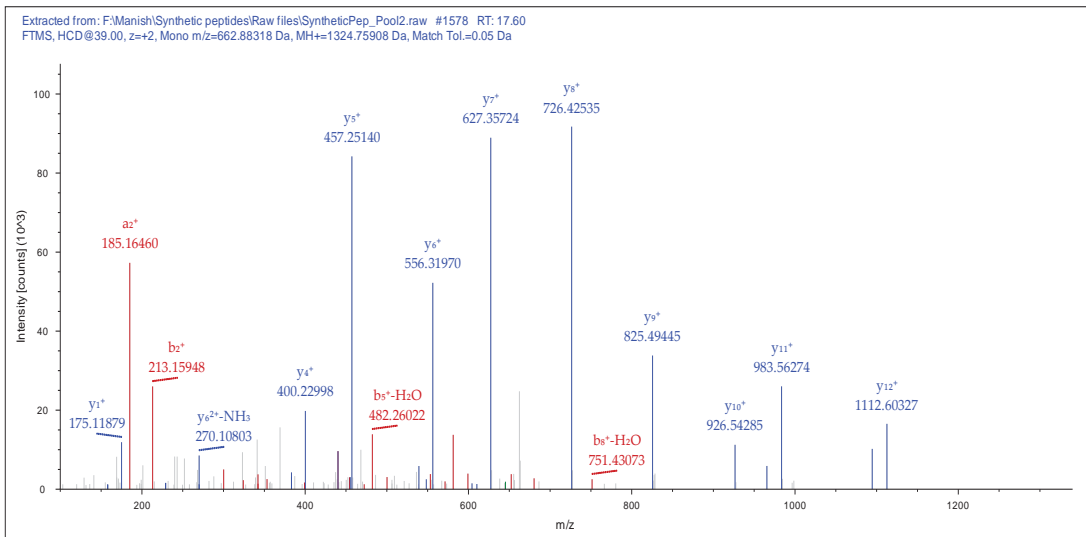

# VRYEPVNLEK

Experiment

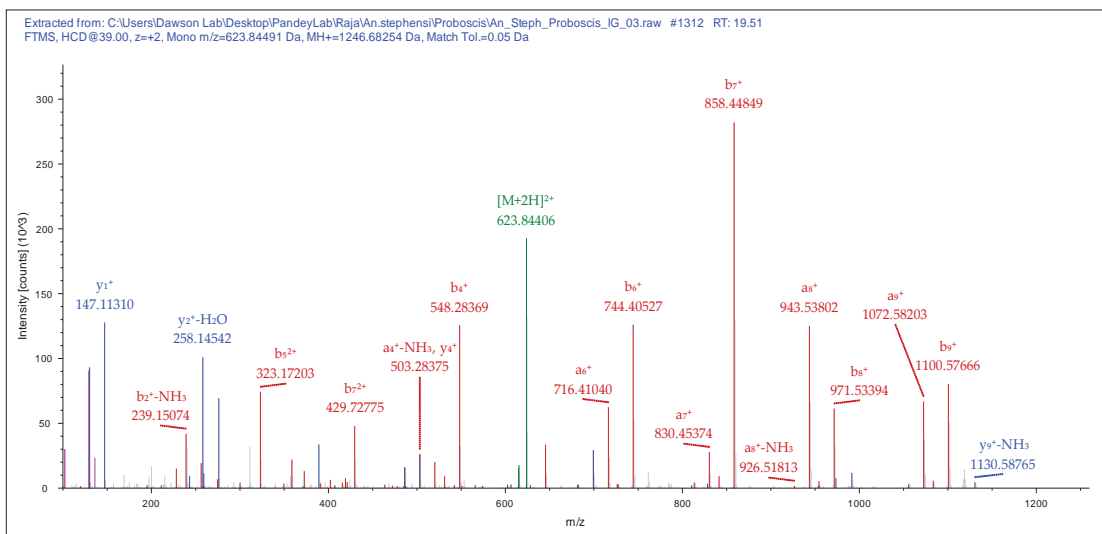

Validated

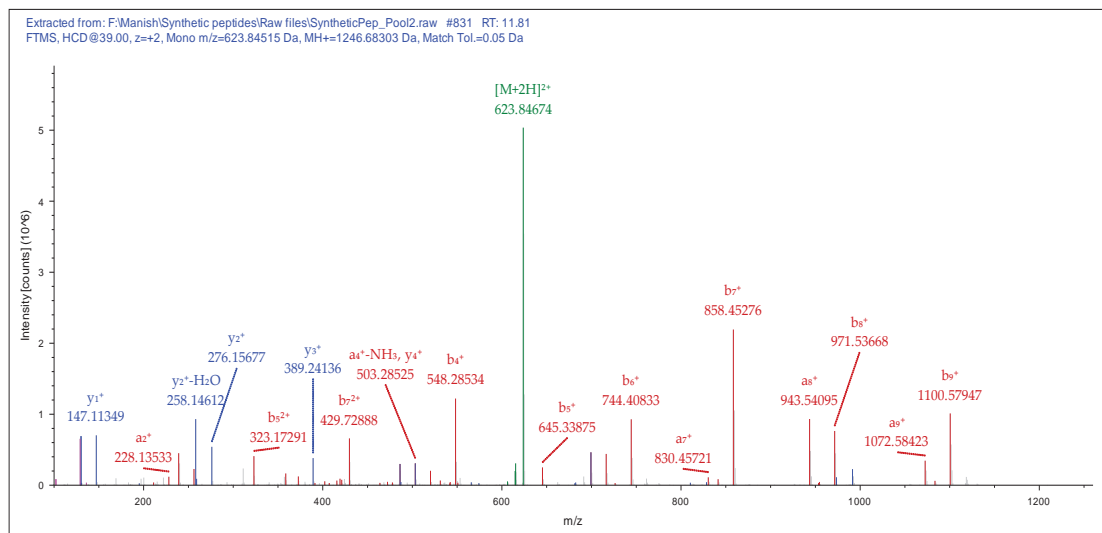

# YEPVNLEKER

Experiment

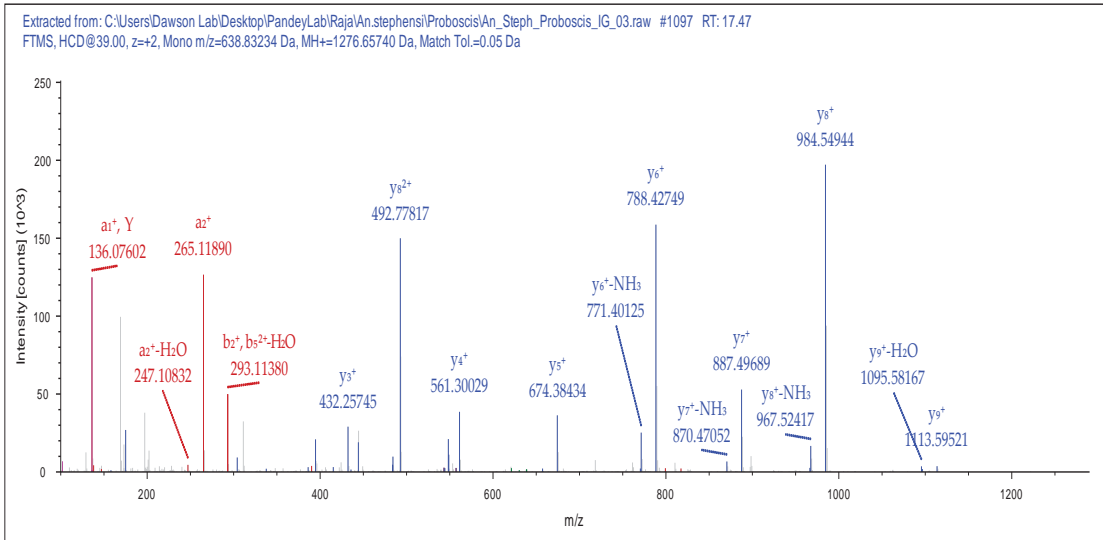

Validated

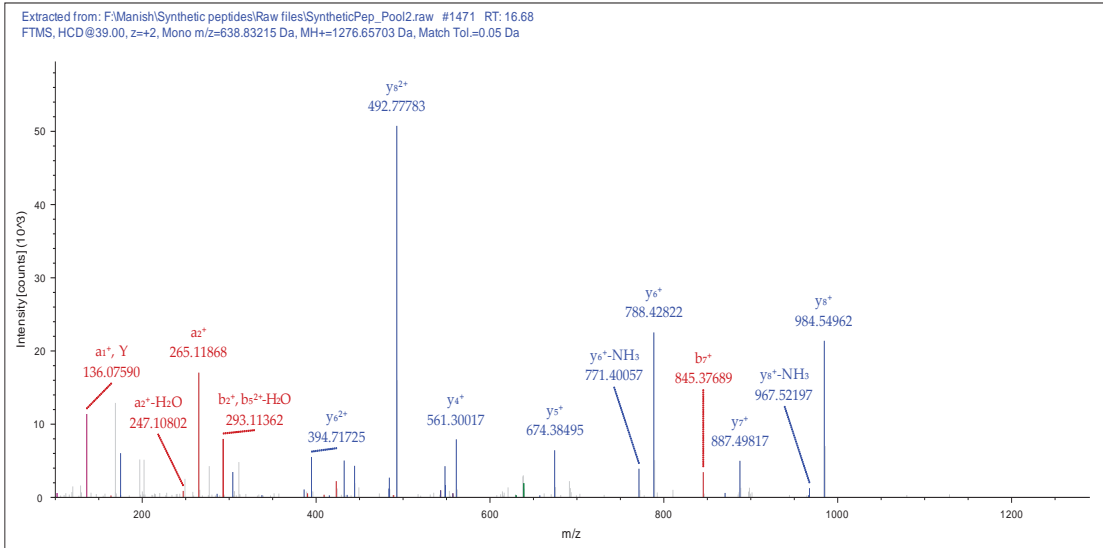

# YREGLELVLR

Experiment

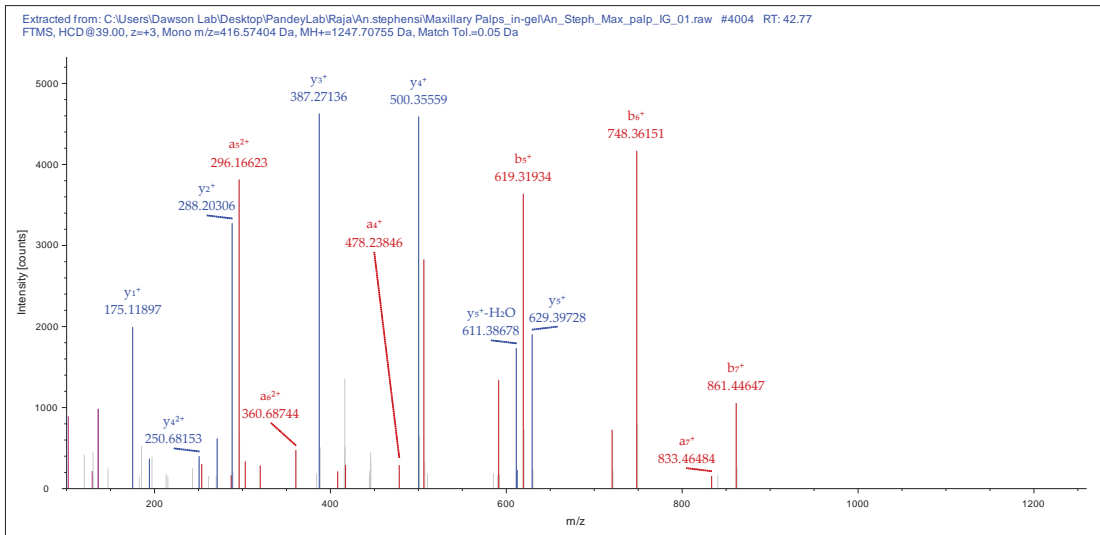

Validated

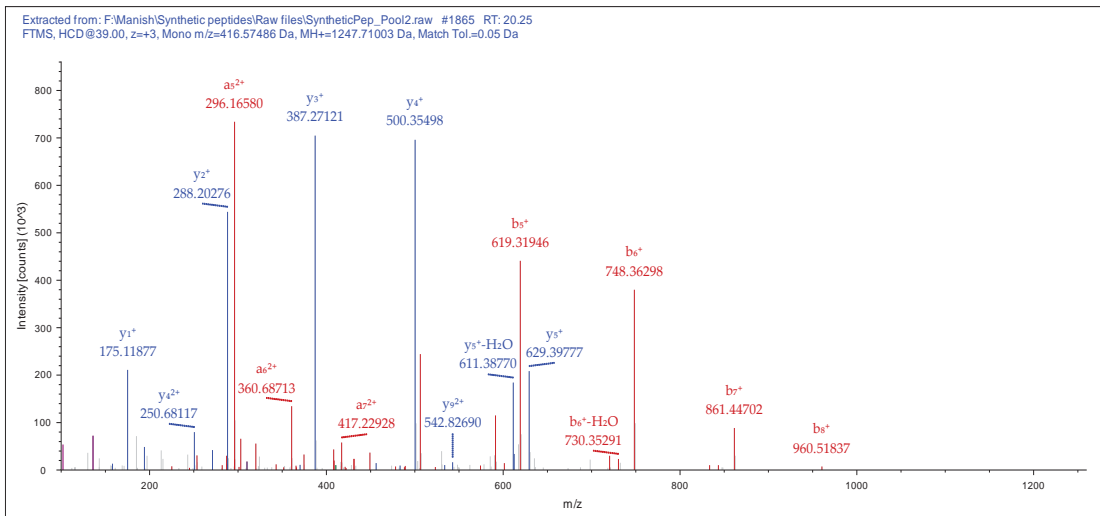

# ASMYFFNTNPSGR

Experiment

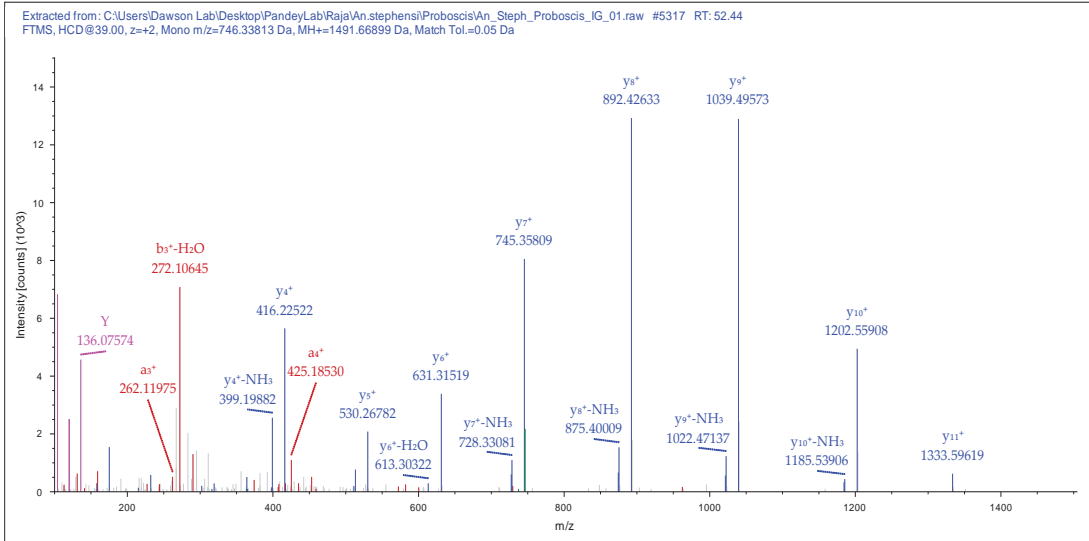

Validated

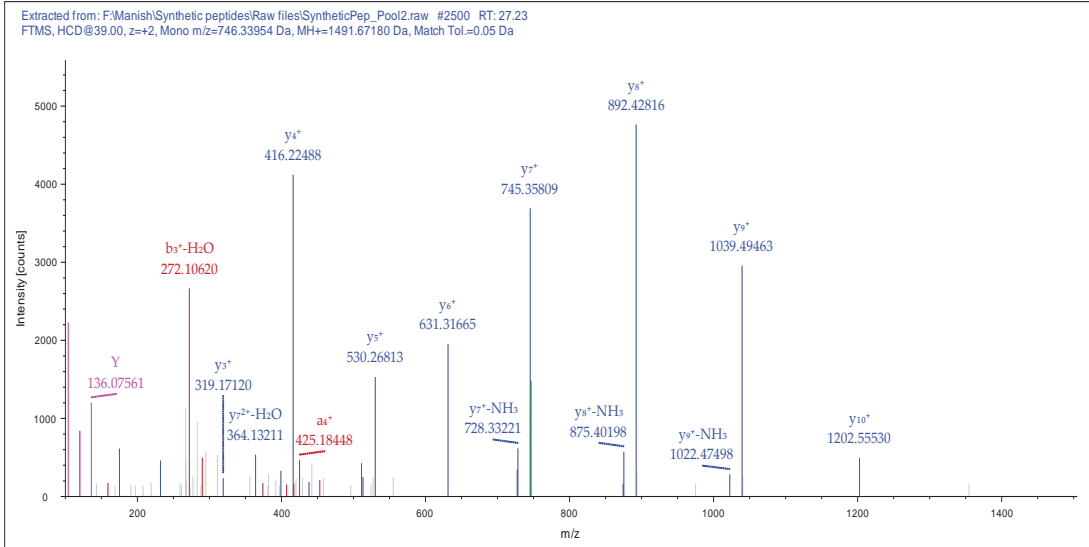



# DDYSYGYAVR

Experiment

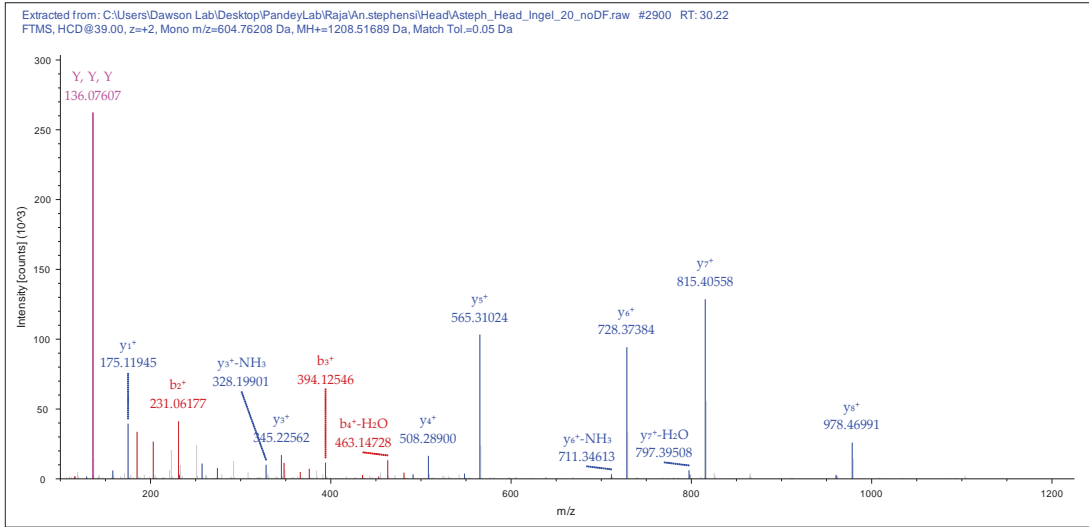

Validated

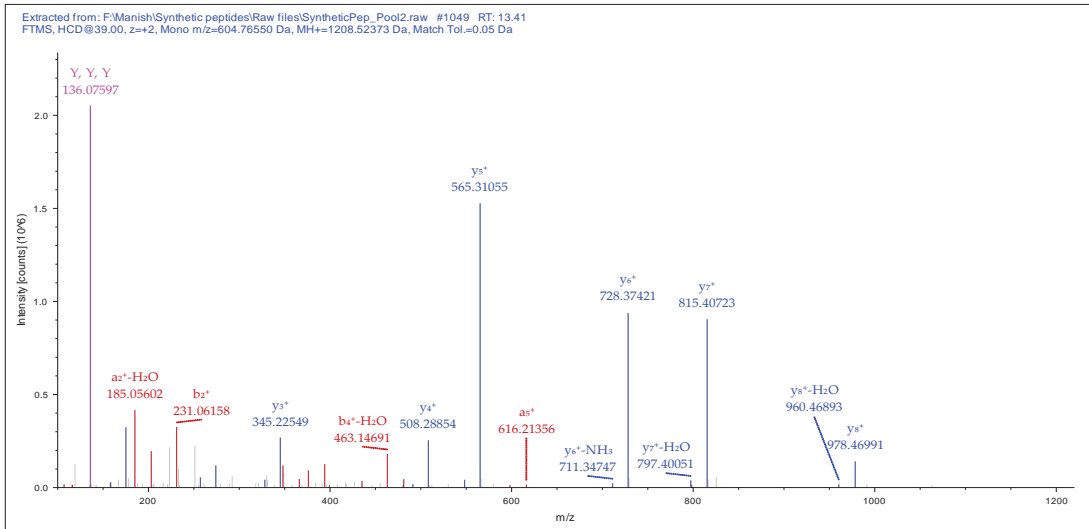

# DIPVAVATPAVAVAAK

Experiment

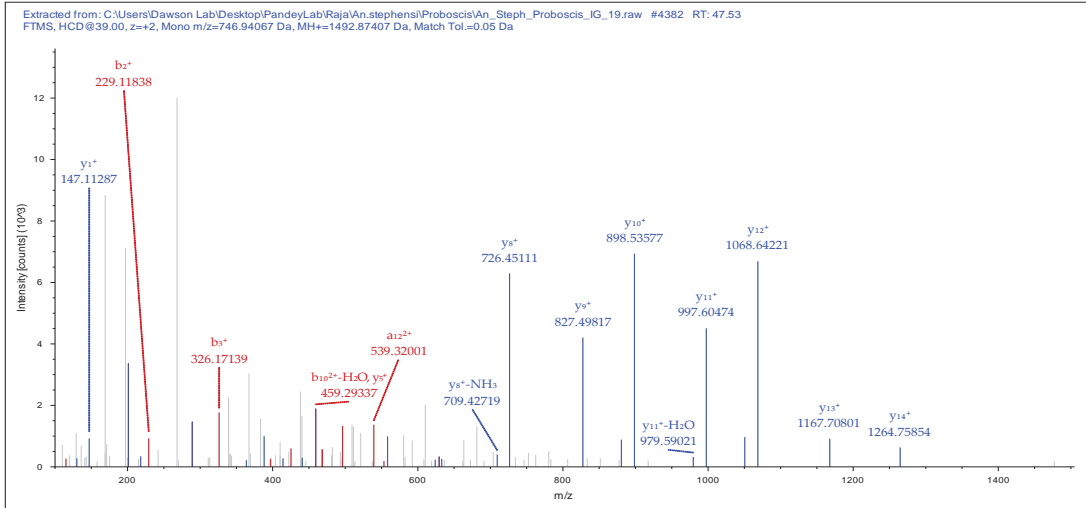

Validated

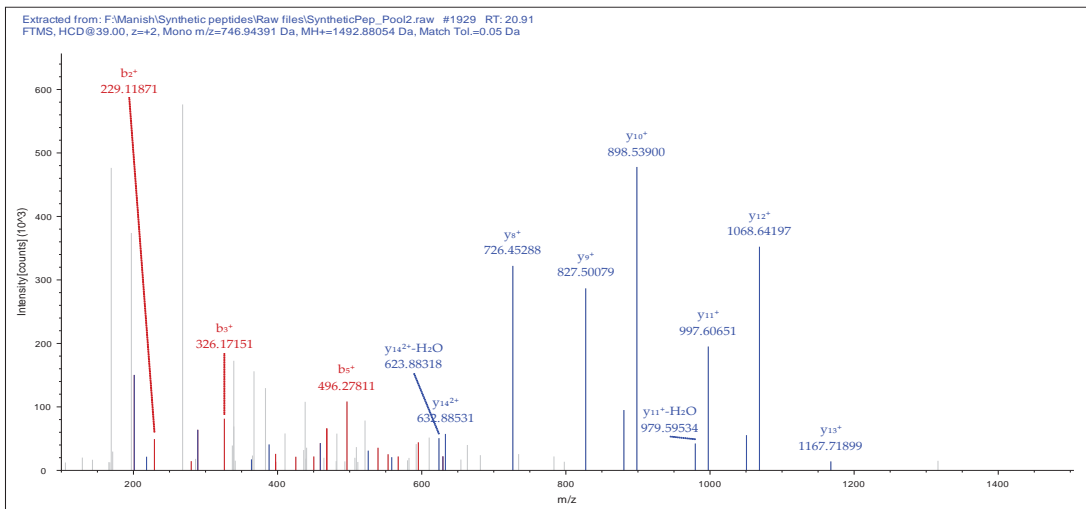

# DLQGKPLIEYAVYR

Experiment

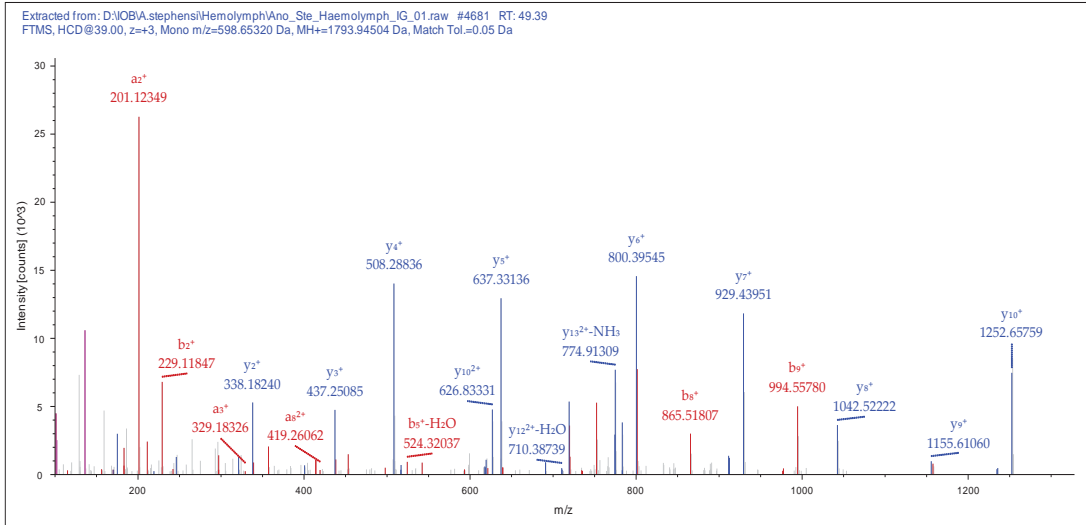

Validated

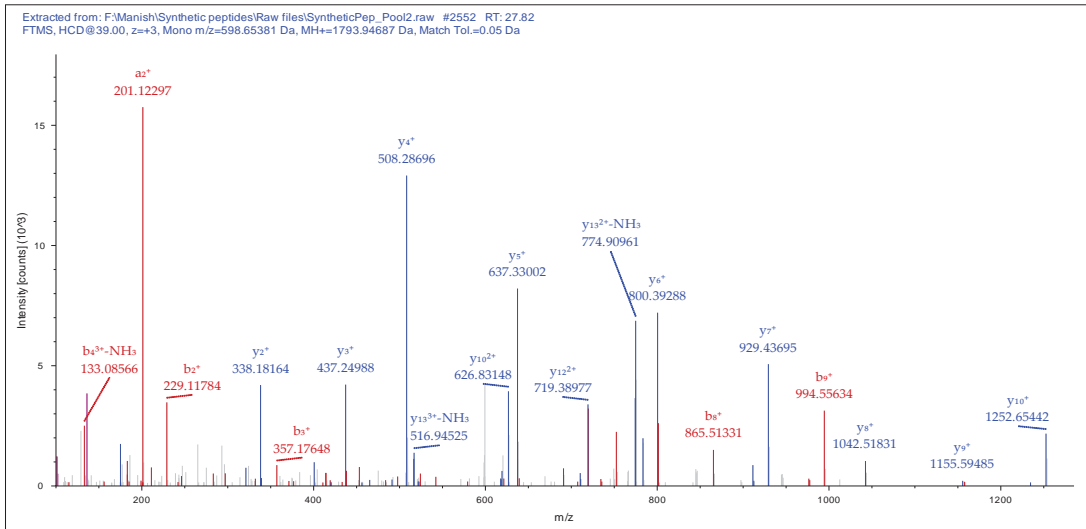

# FSNYGQVIR

Experiment

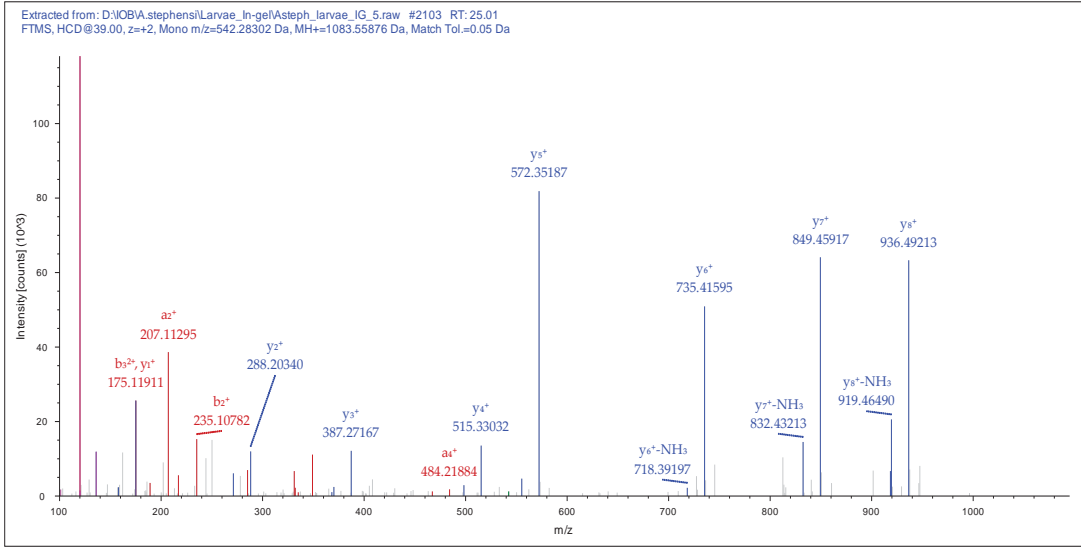

Validated

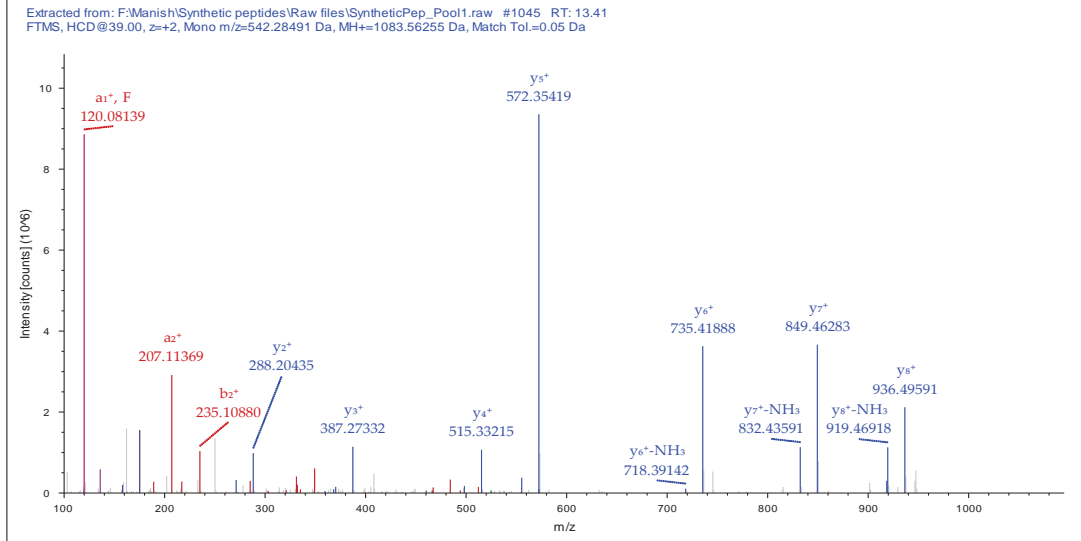

# GGTPTSAATTPPAKR

Experiment

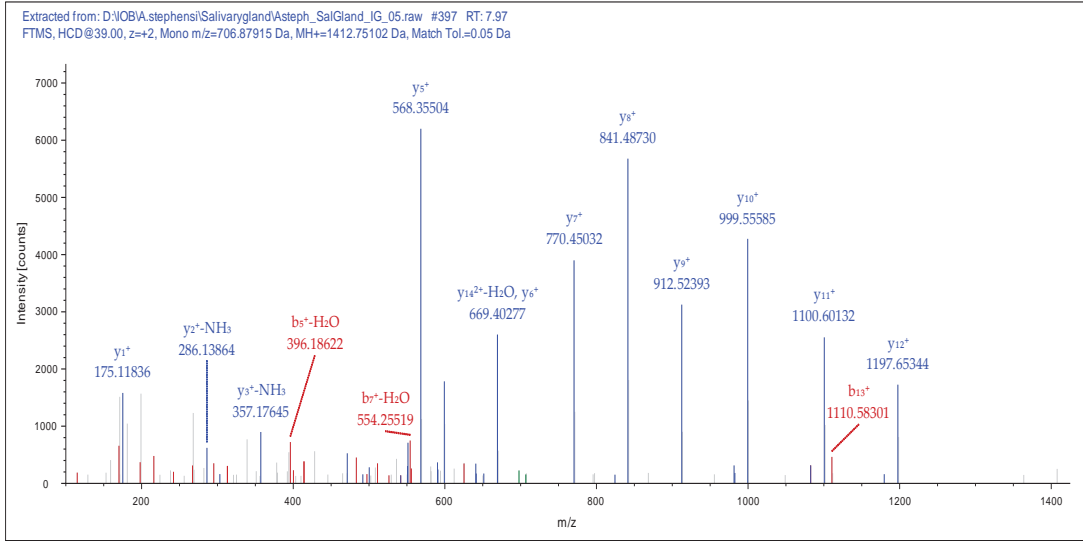

Validated

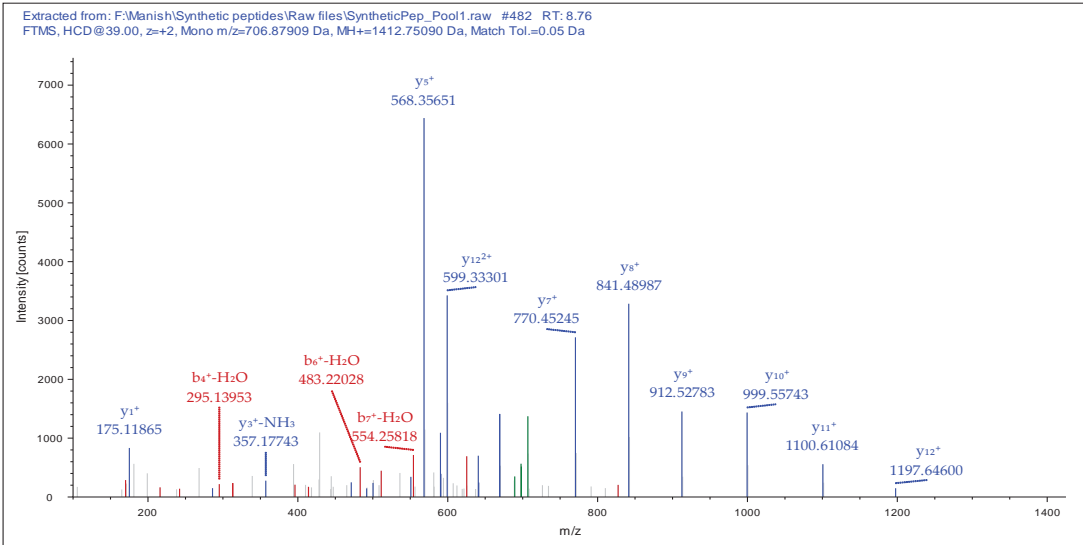

# GLQWTTVIER

Experiment

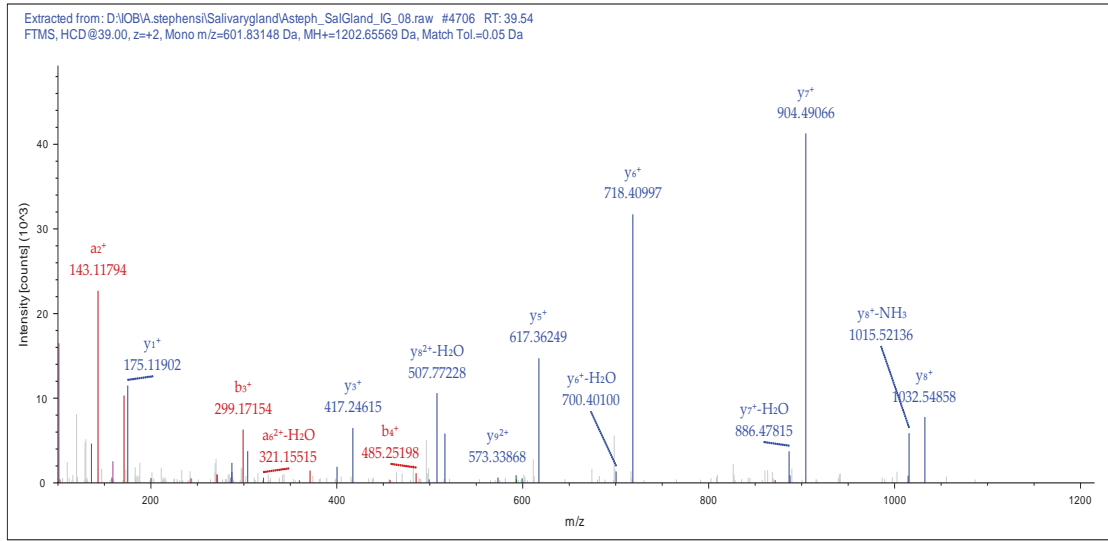

Validated

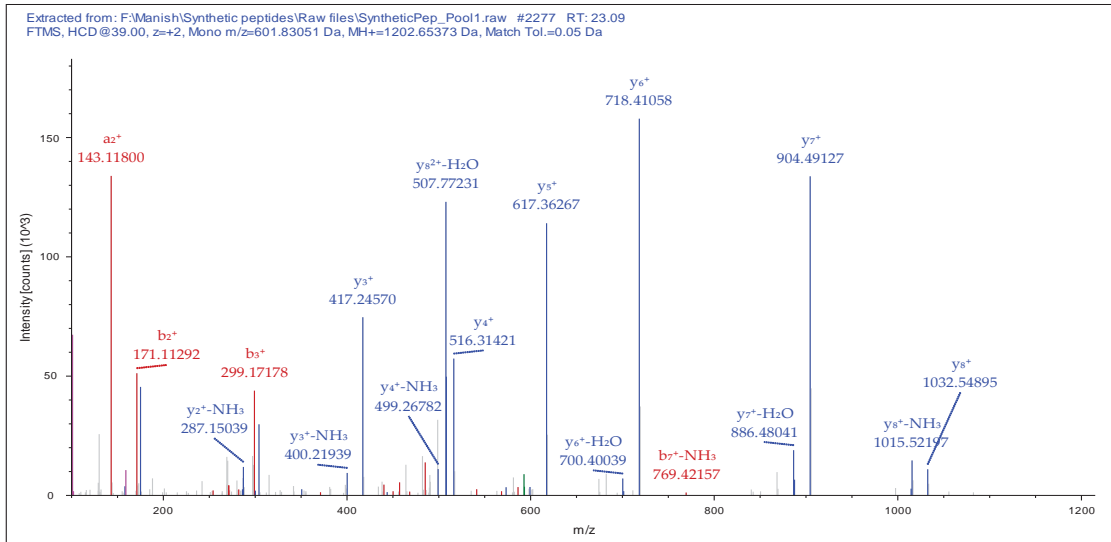

# GPGDTSNFDDYEEETLR

Experiment

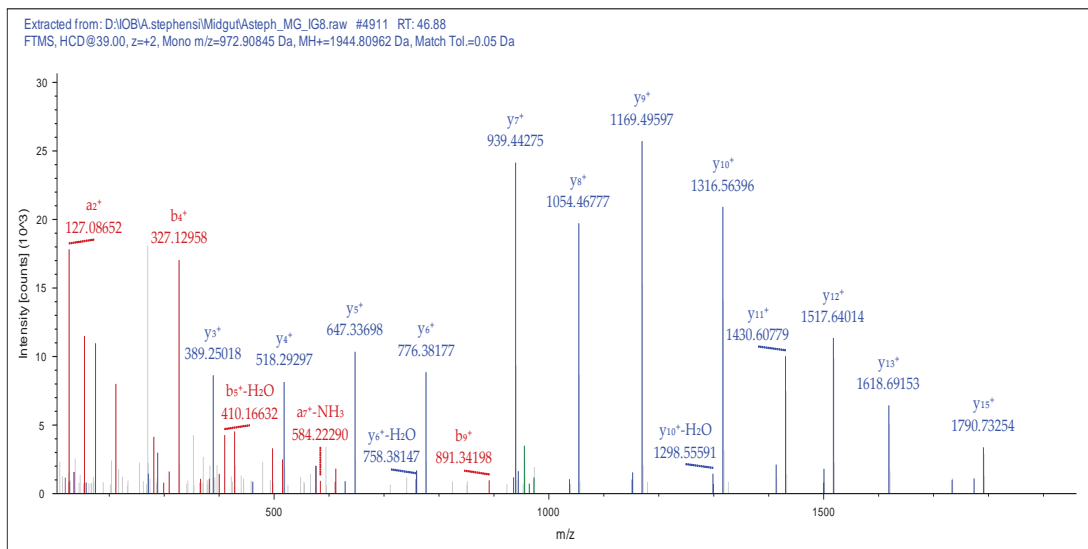

Validated

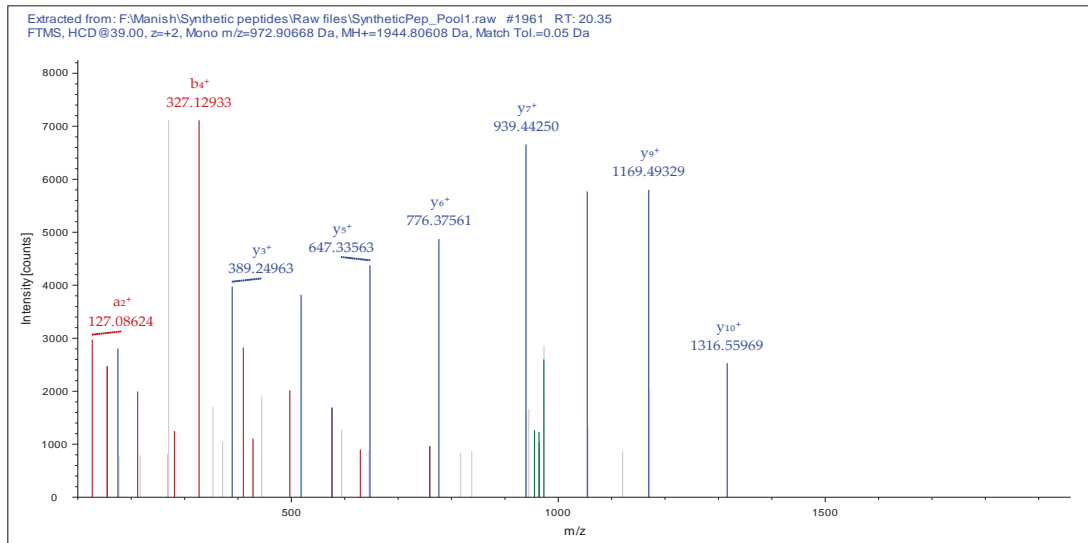

# GQYSLHEADGTER

Experiment

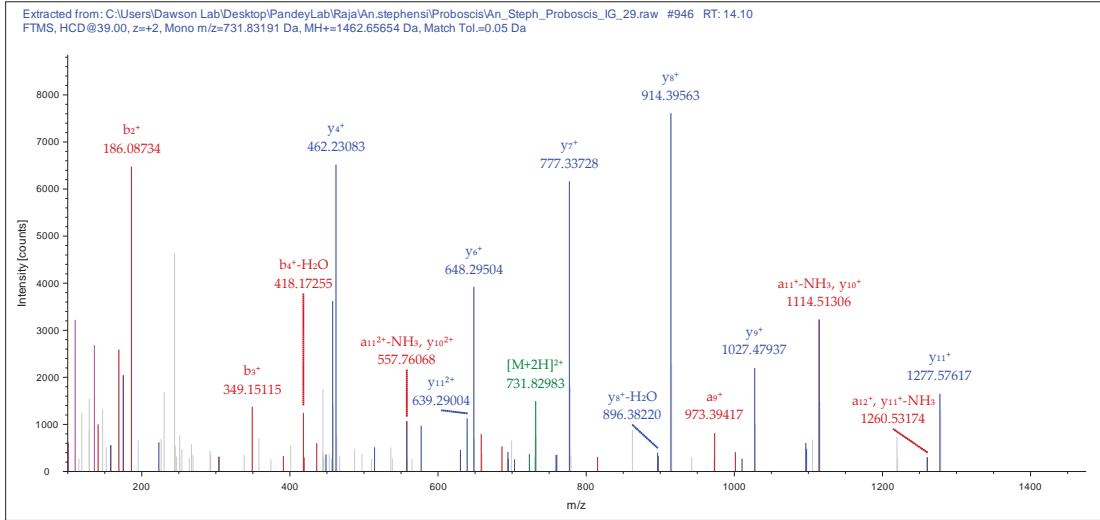

Validated

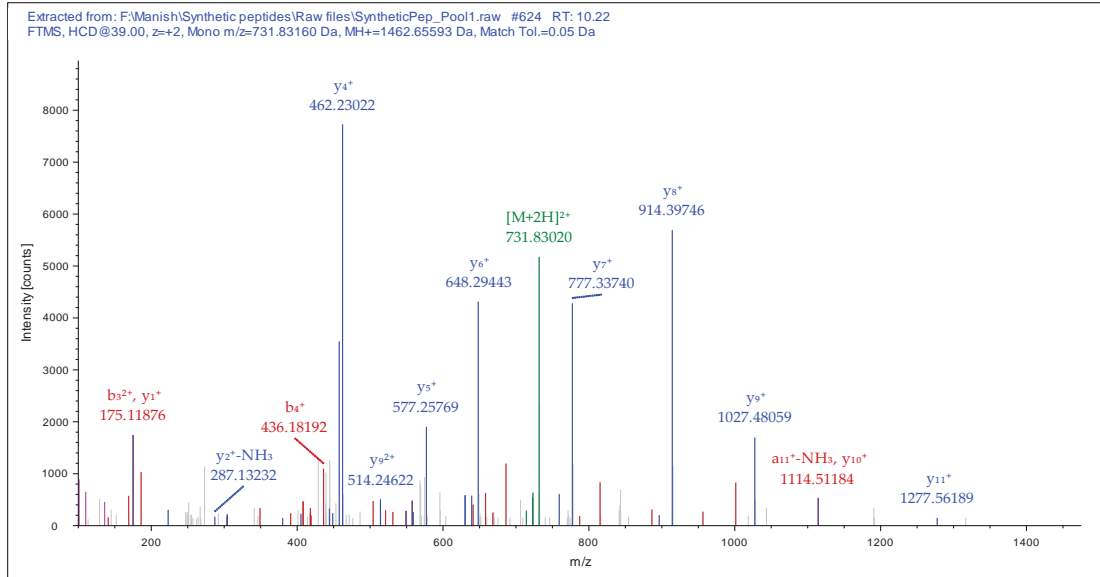



# GWILVDYPNIADDVK

Experiment

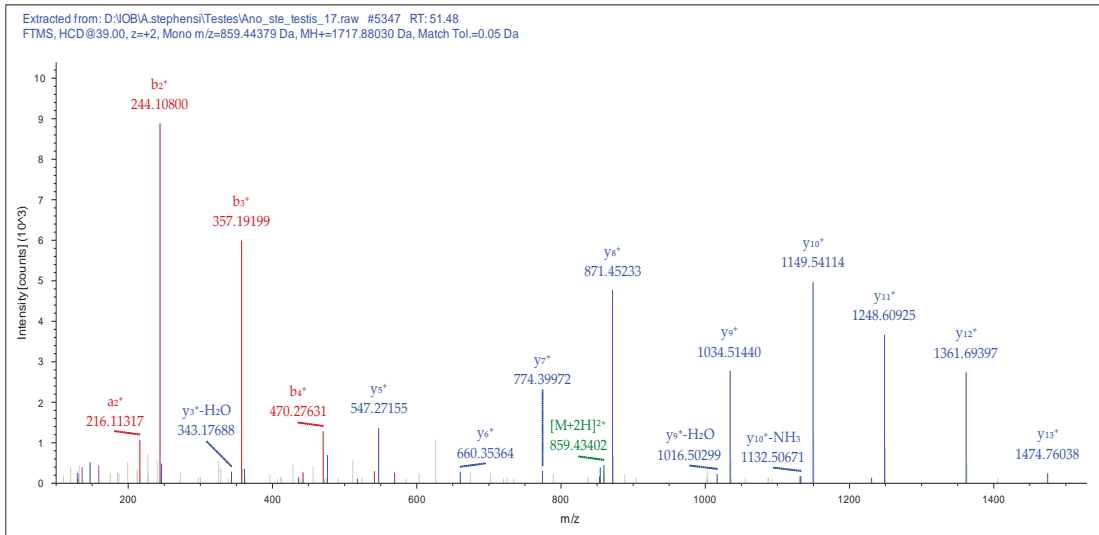

Validated

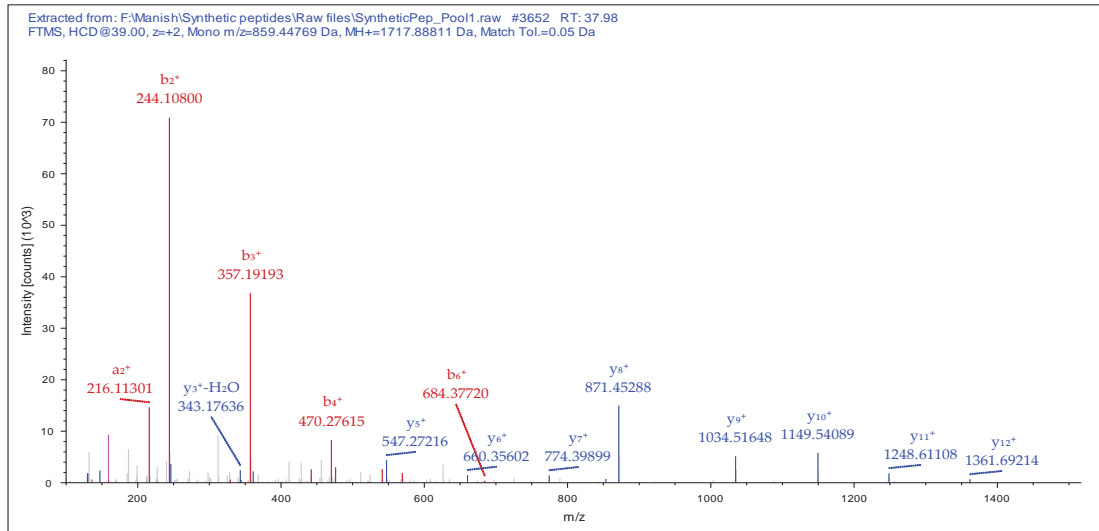

# HVIFFEPGYAR

Experiment

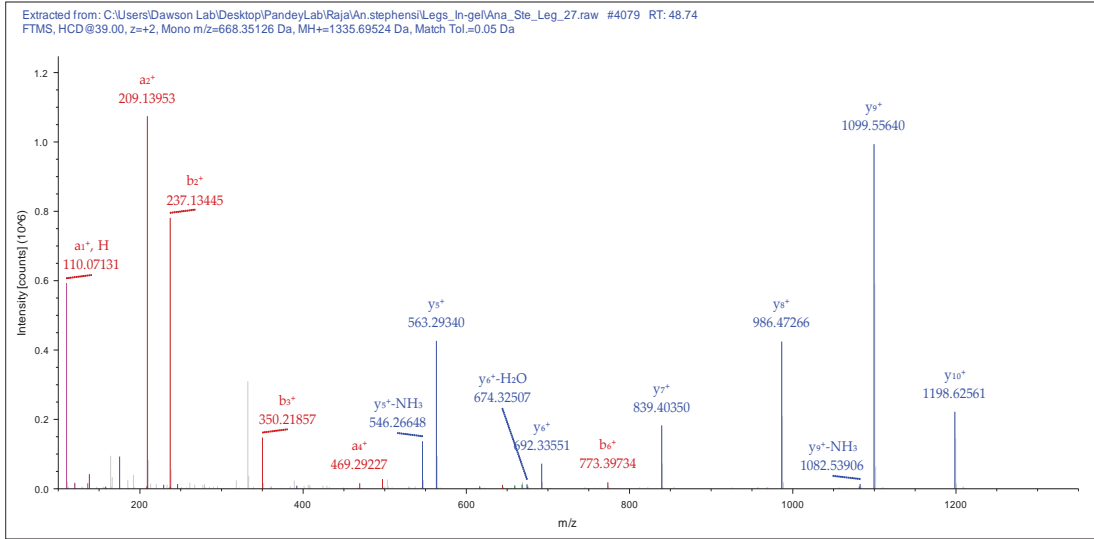

Validated

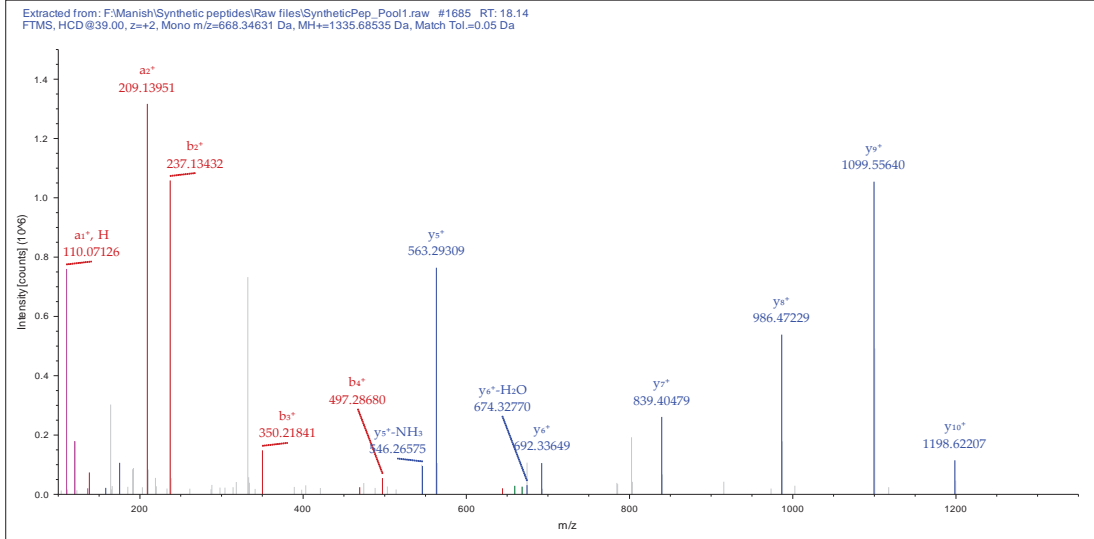

# IDREALTK

Experiment

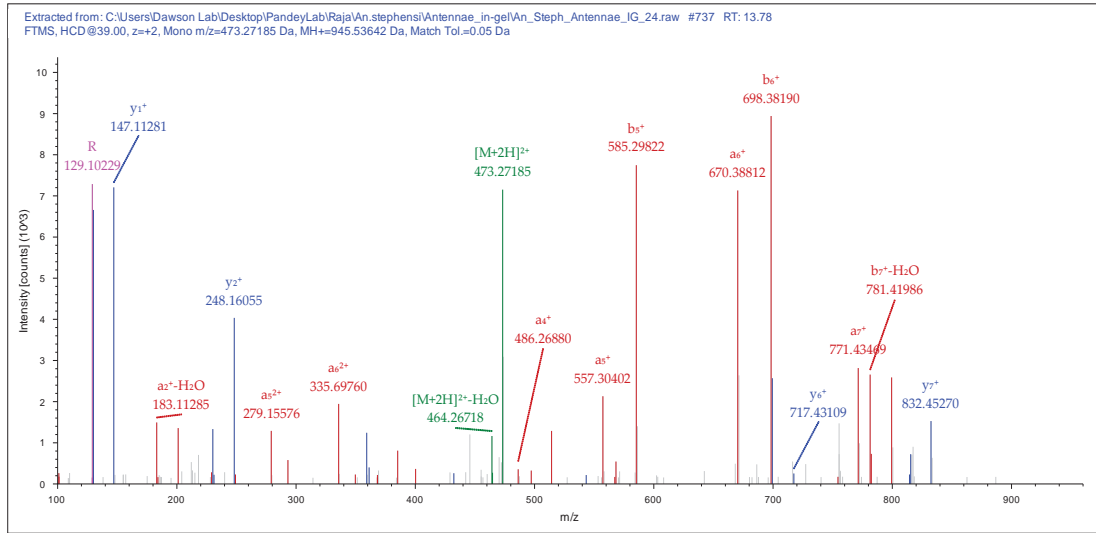

Validated

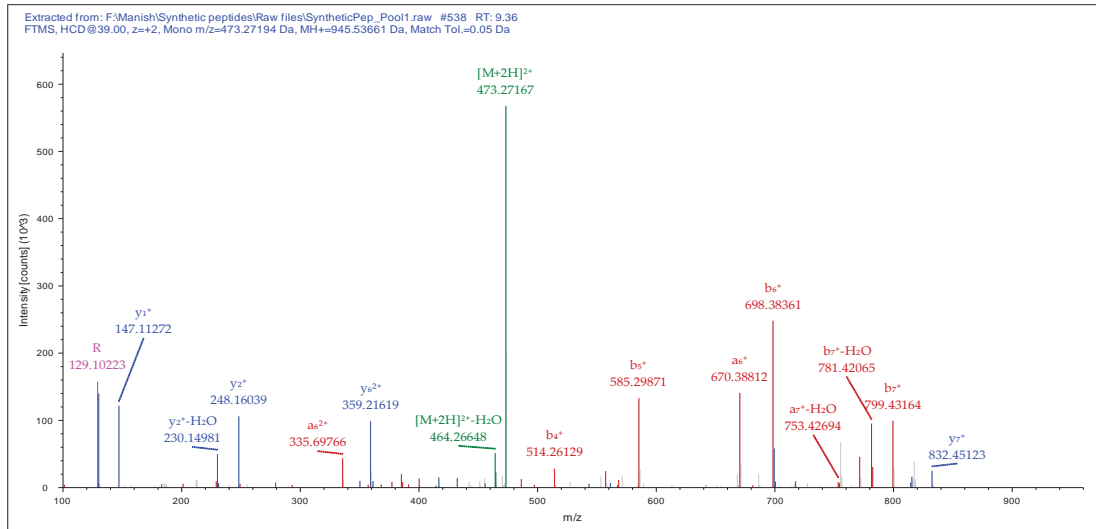

# INVDQAFHELVR

Experiment

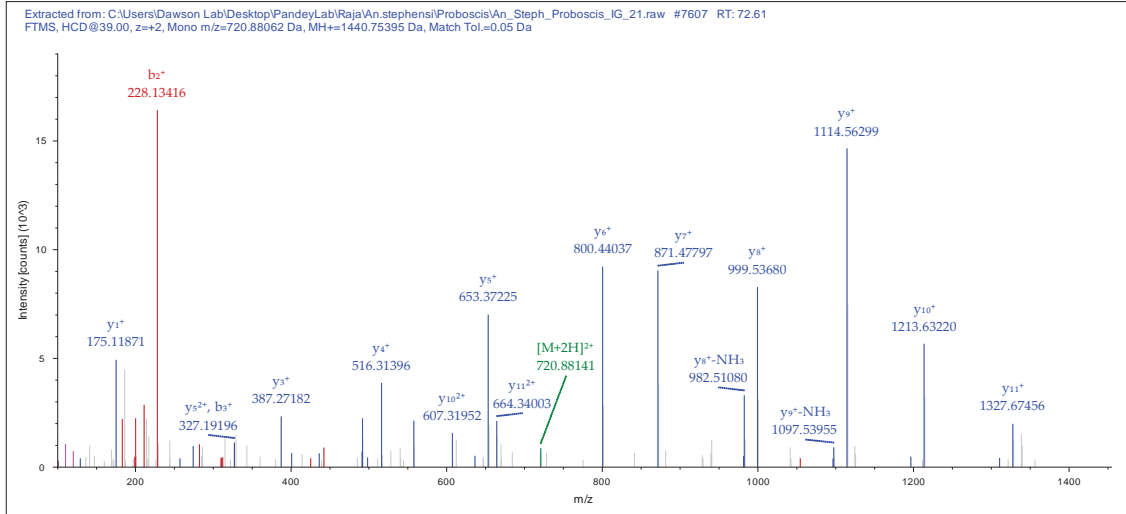

Validated

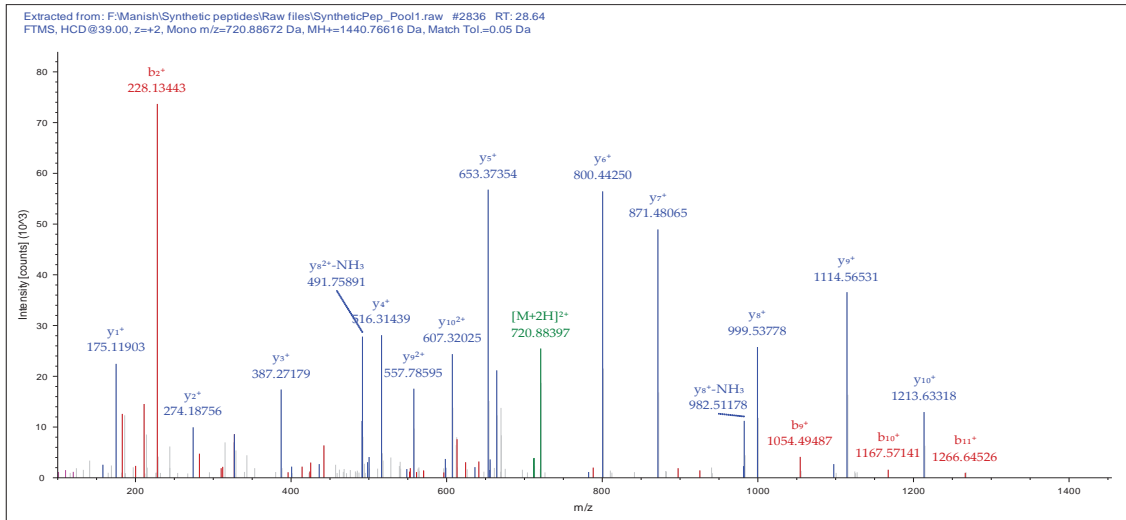

# IQELFITGTR

Experiment

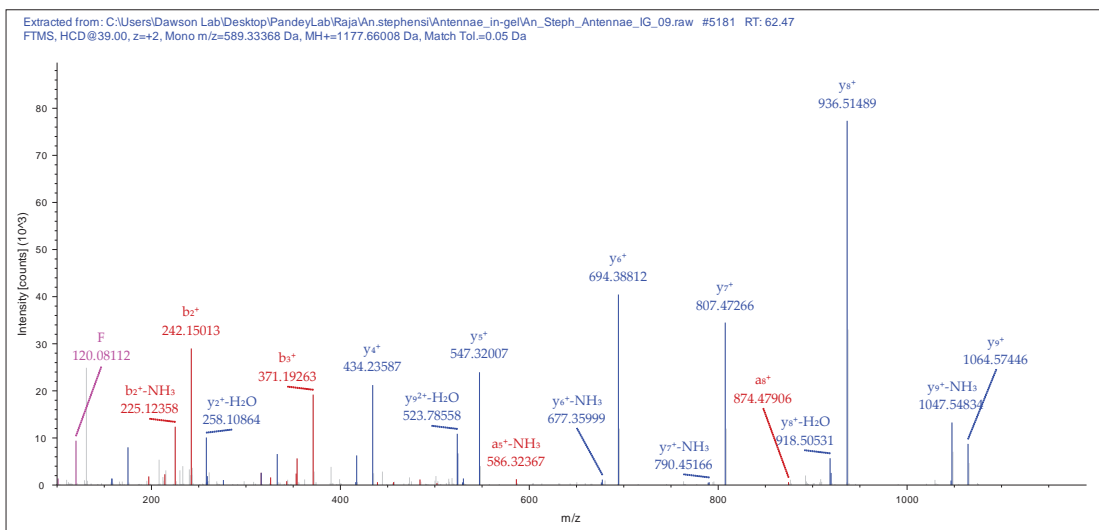

Validated

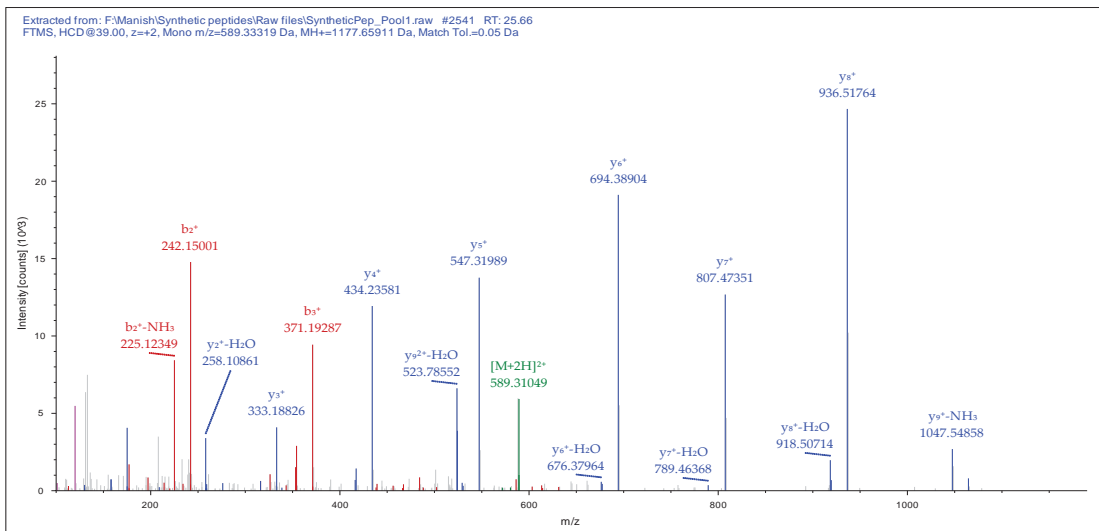

# ISALENLQILLK

Experiment

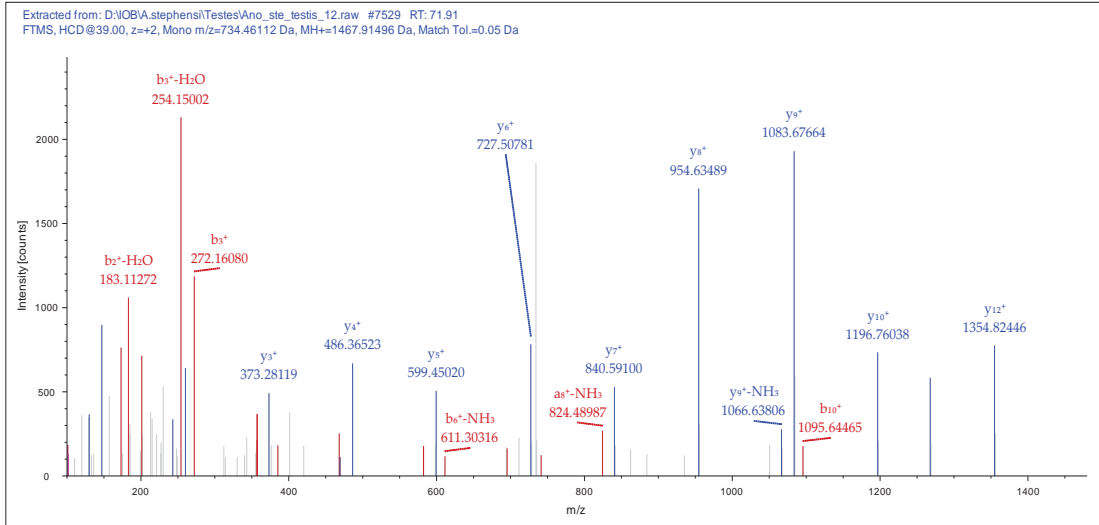

Validated

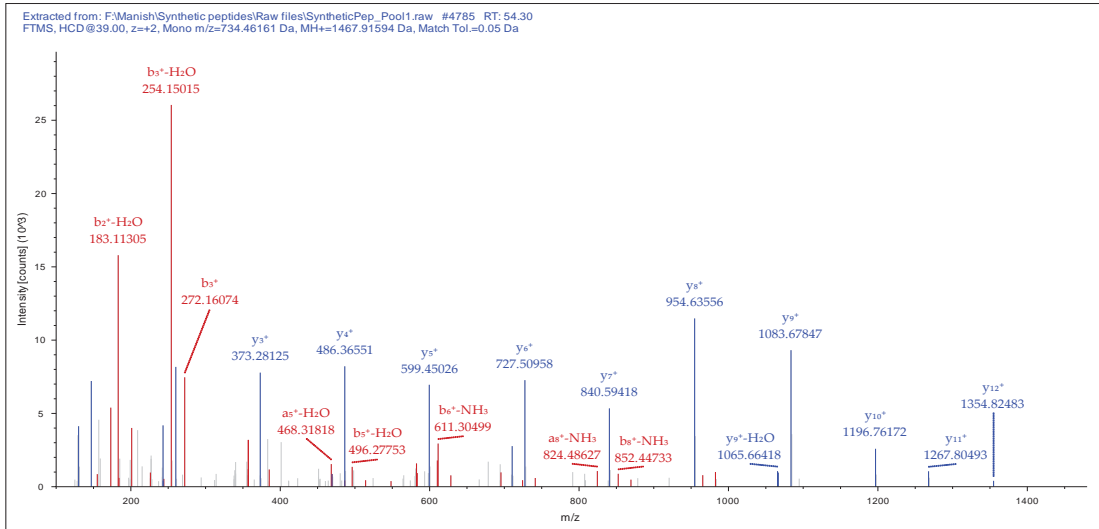

# ISTVEEFQAADSER

Experiment

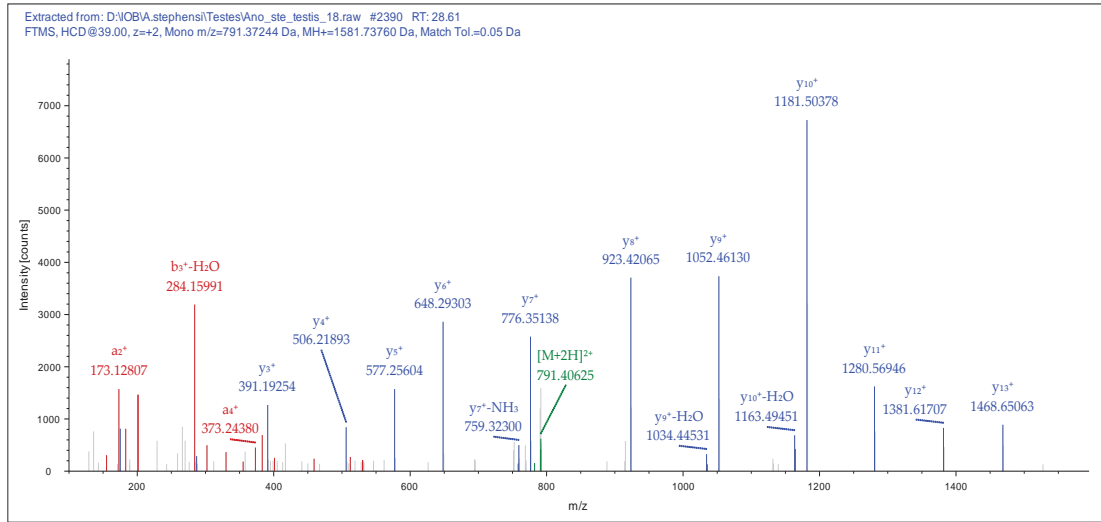

Validated

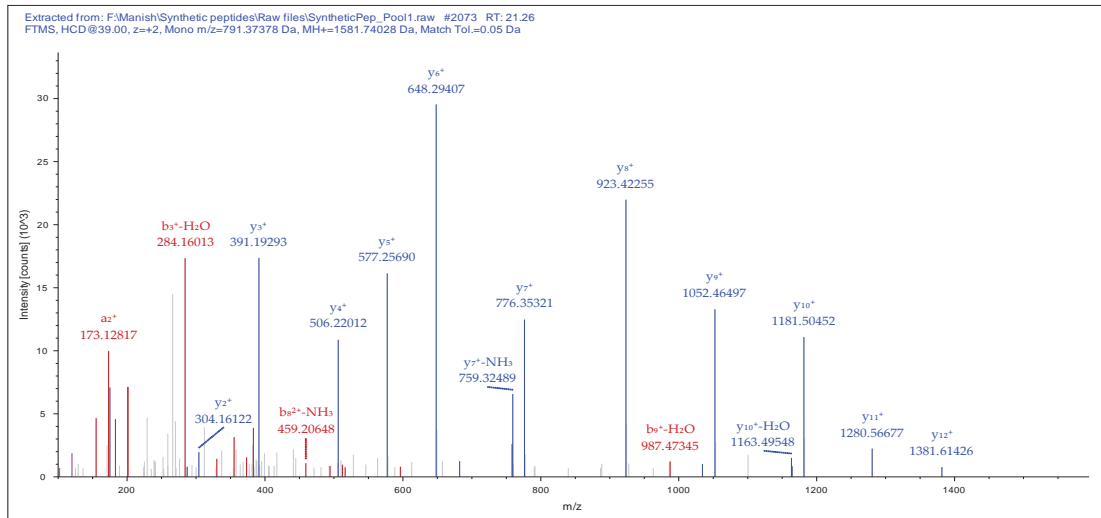

# ITTTDTGIHFVK

Experiment

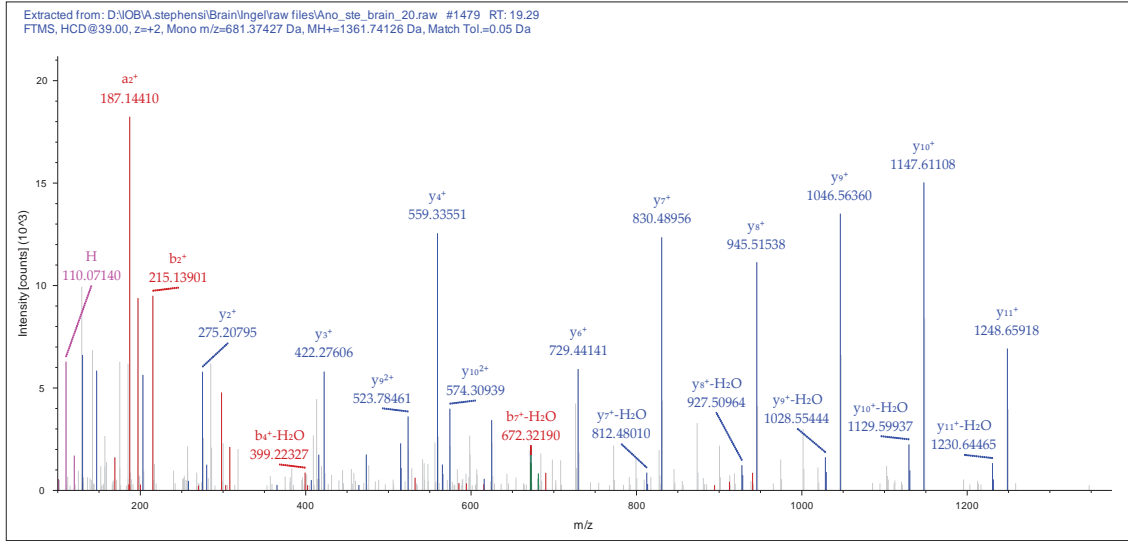

Validated

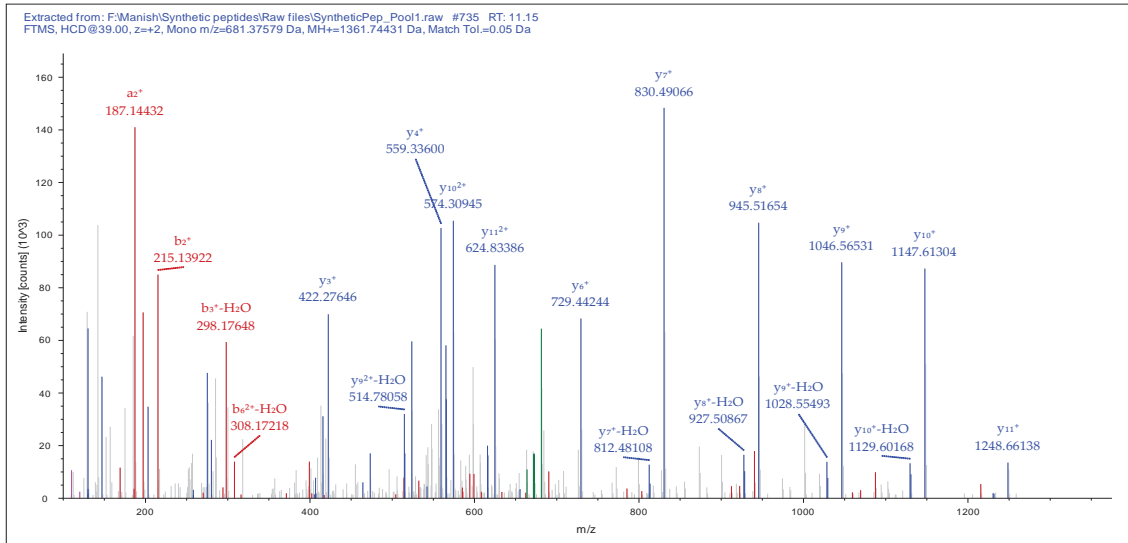



# IVDYTADDVR

Experiment

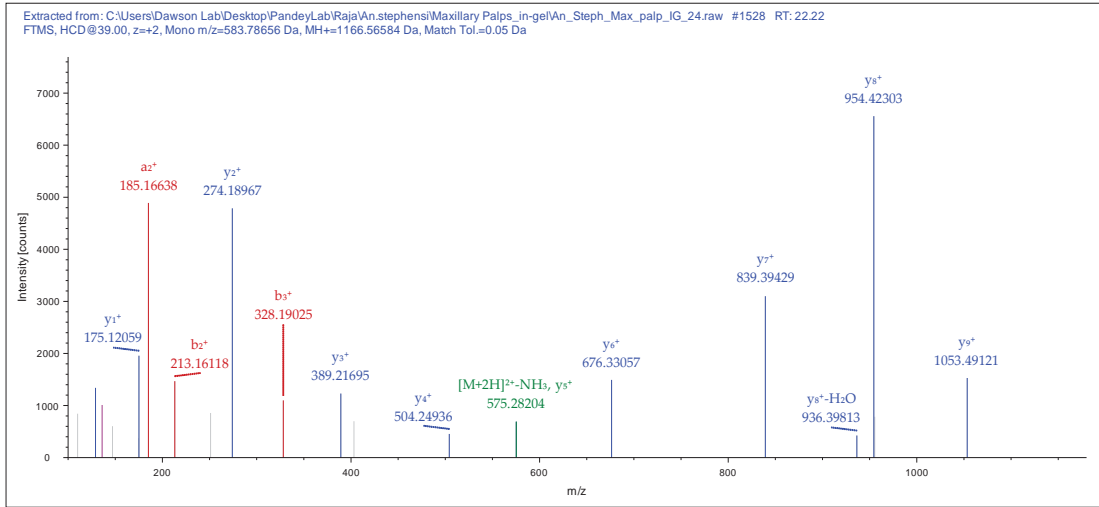

Validated

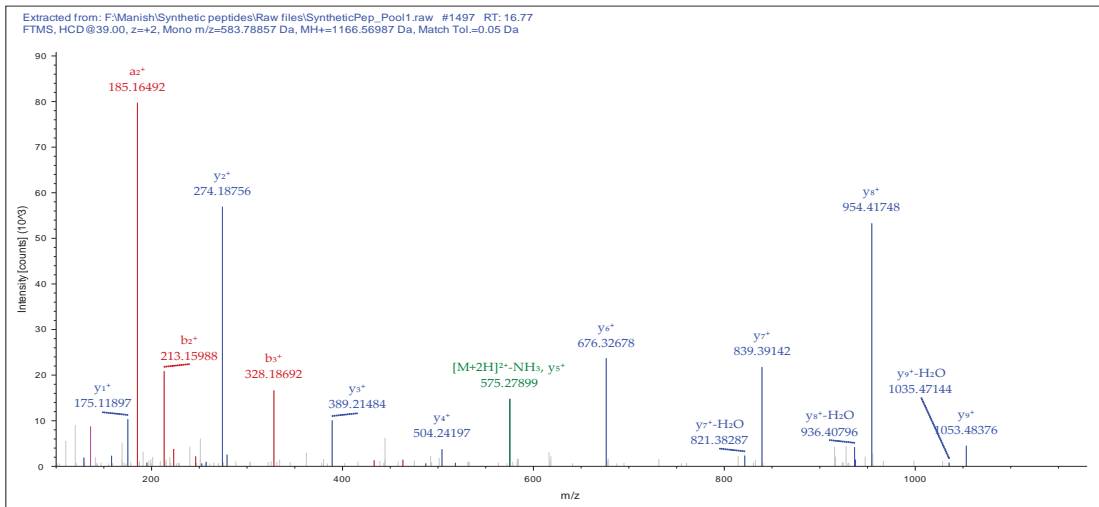

# KVHQSVMASR

Experiment

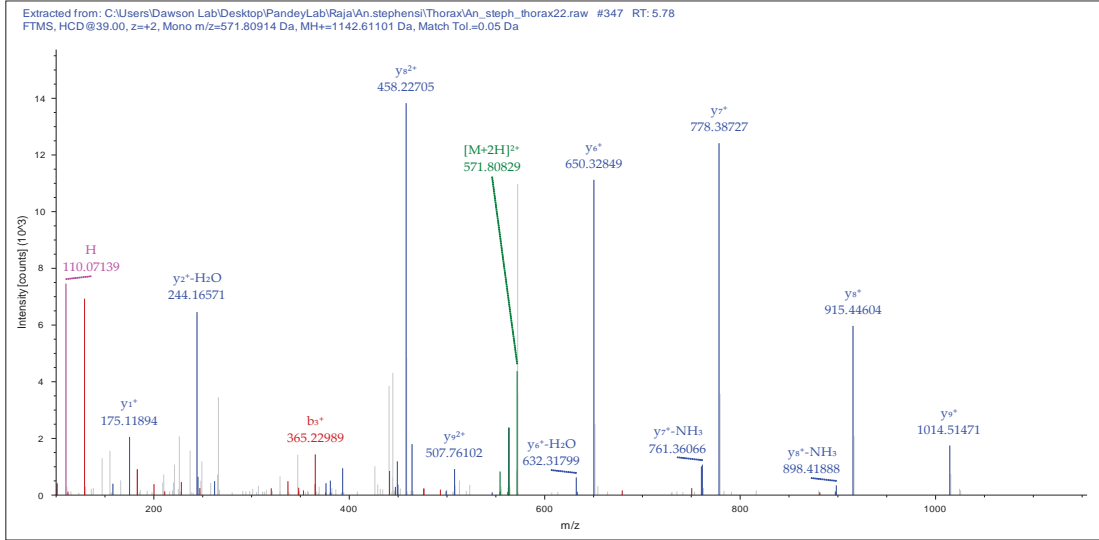

Validated

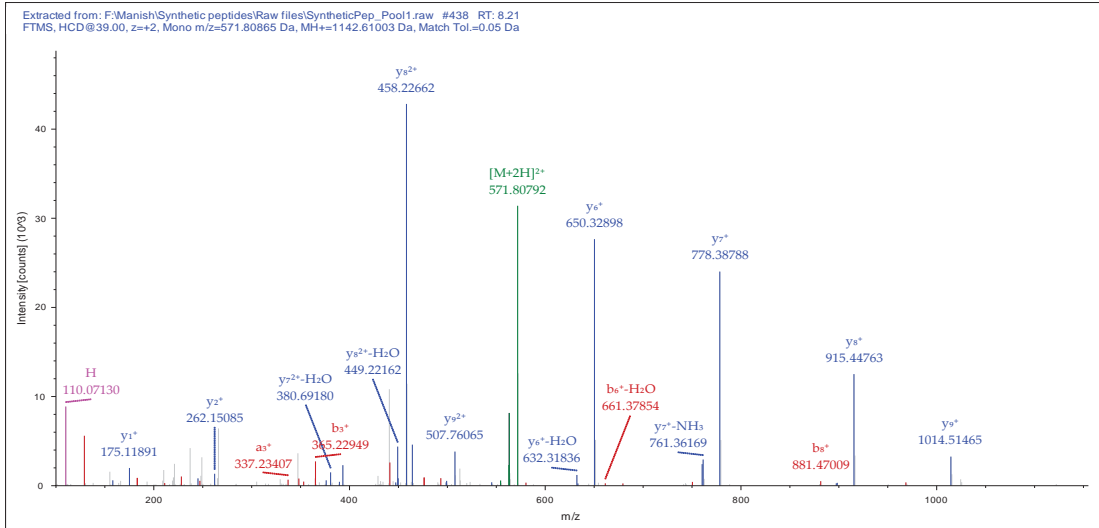

# LFGLIPITHPEPLIFAGR

Experiment

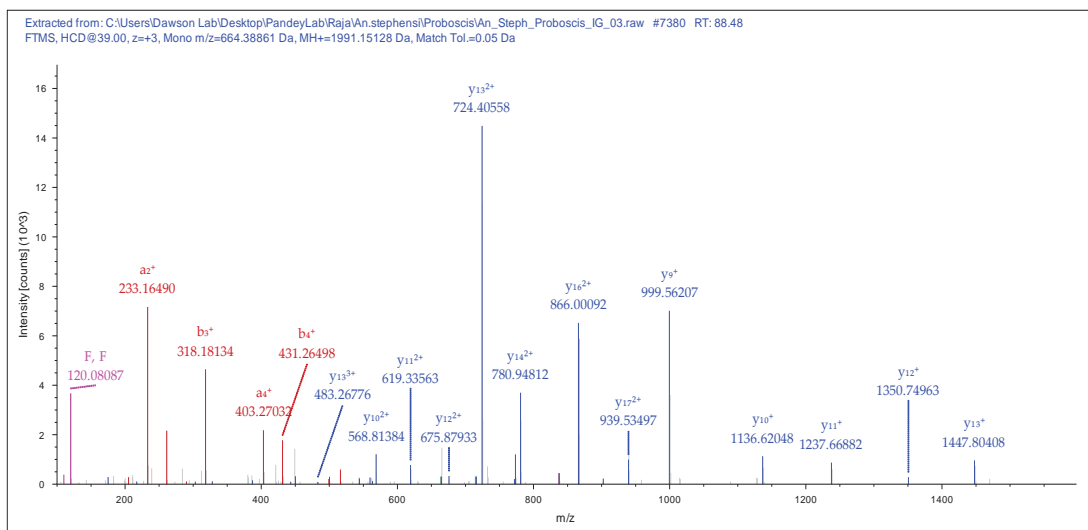

Validated

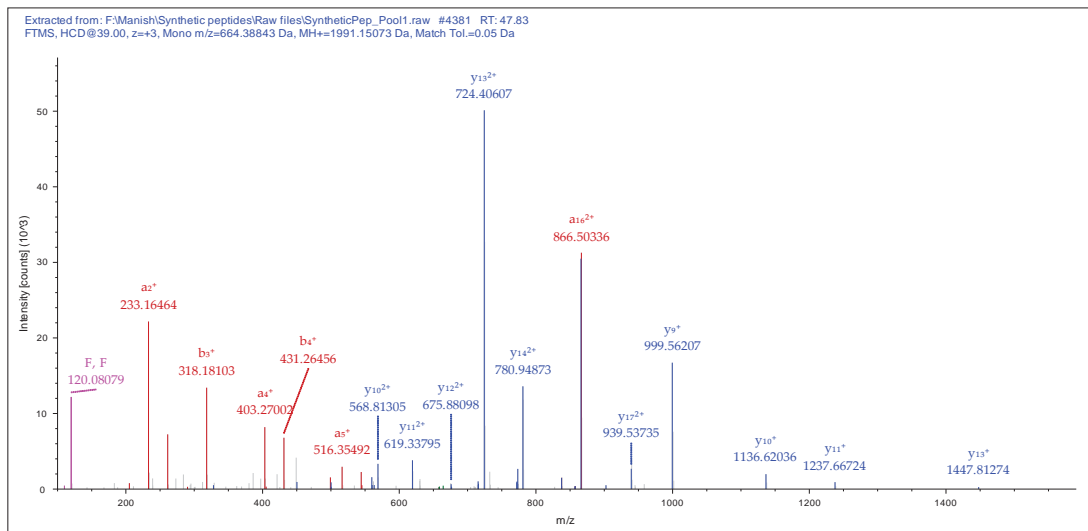

# LTSYDWENQFESFQDATR

Experiment

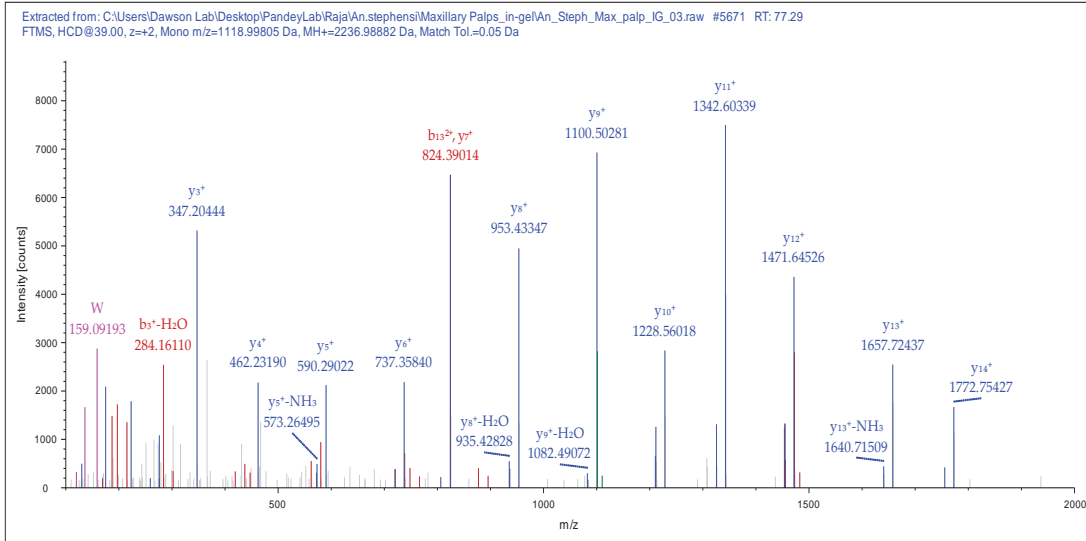

Validated

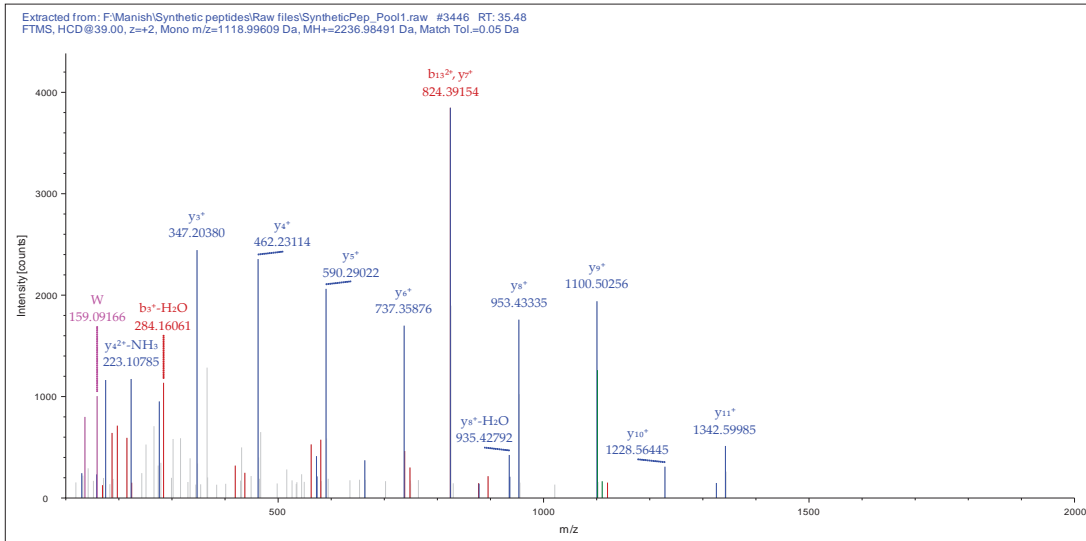

# NFLAAISAYSAGIR

Experiment

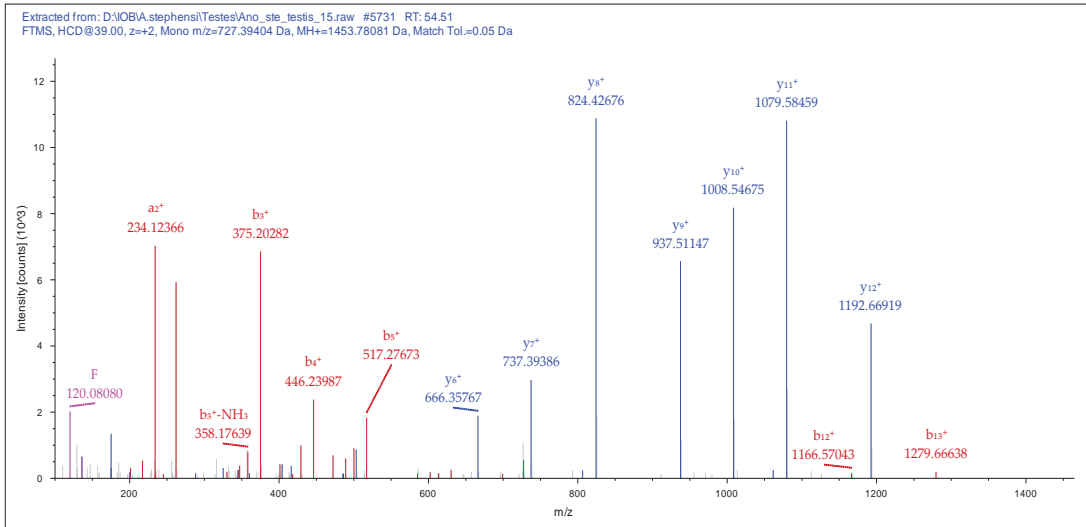

Validated

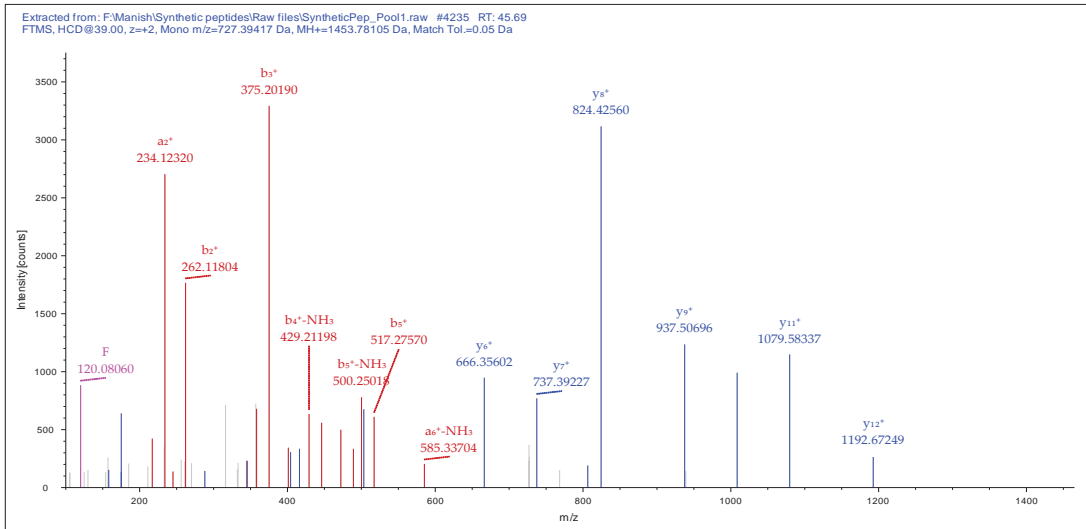

# NLLQVDLTK

Experiment

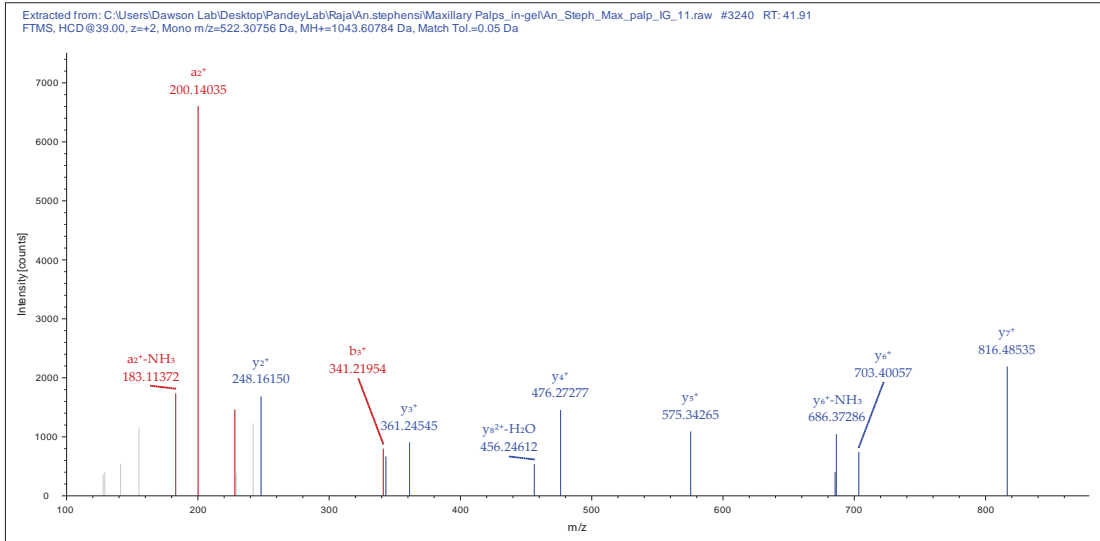

Validated

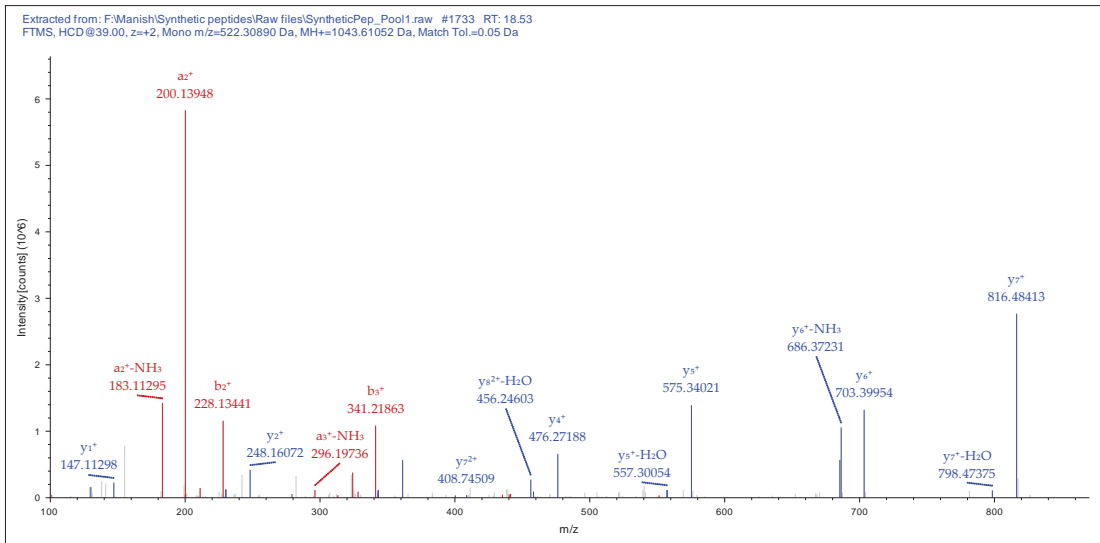

# NPFGVVEHTINEEFR

Experiment

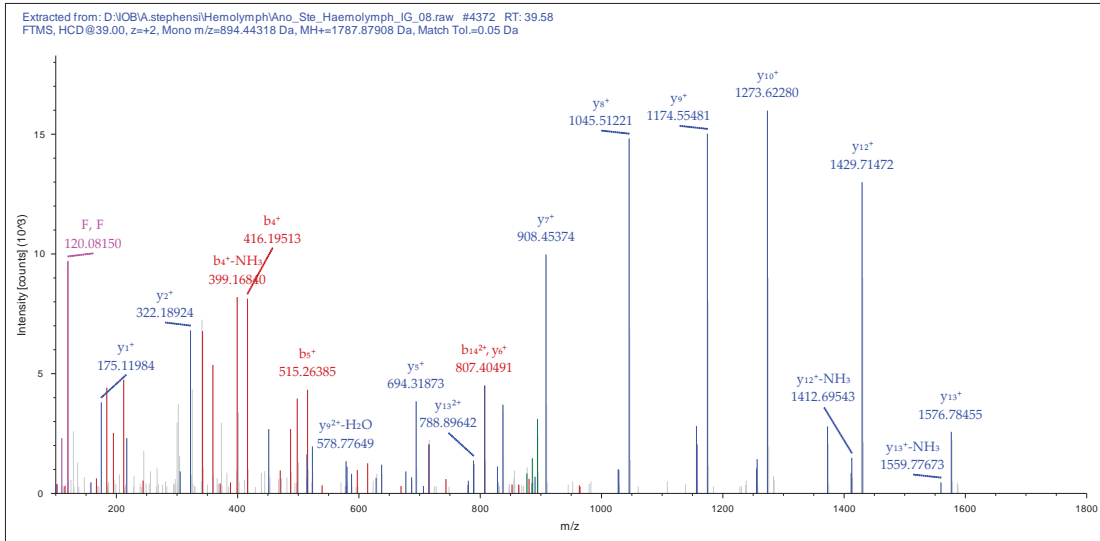

Validated

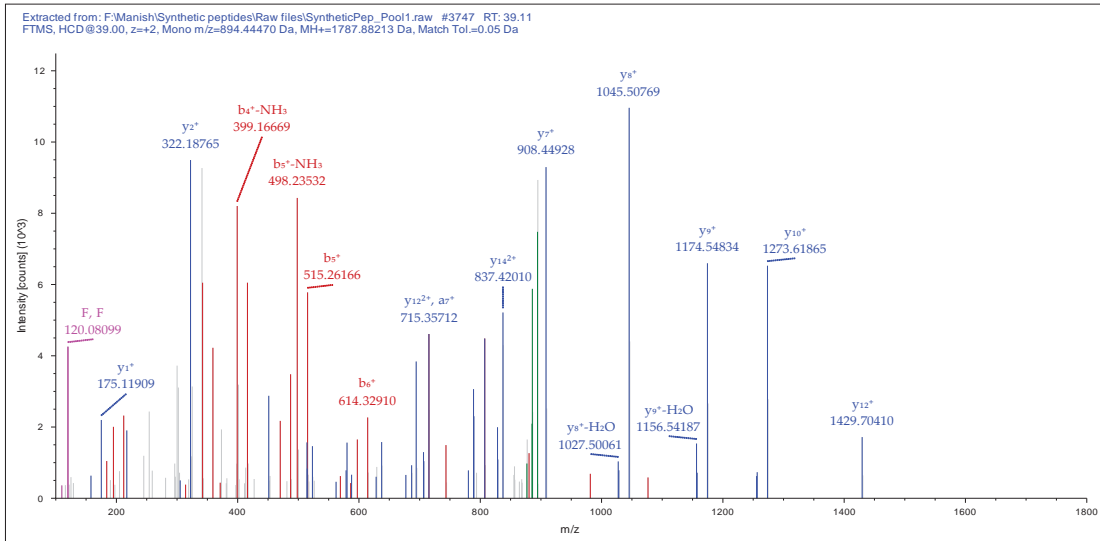

# NPTNTAALDDFER

Experiment

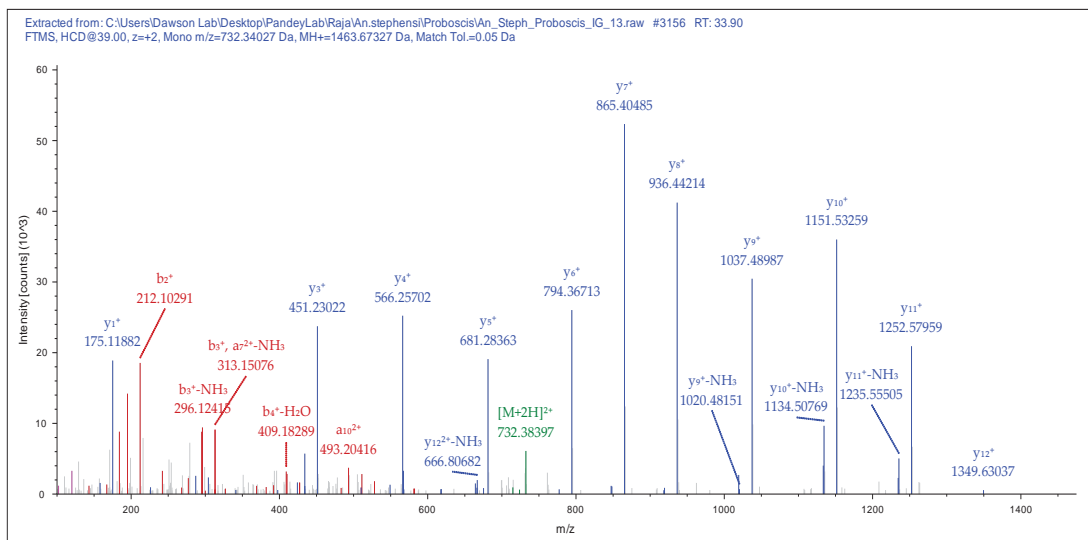

Validated

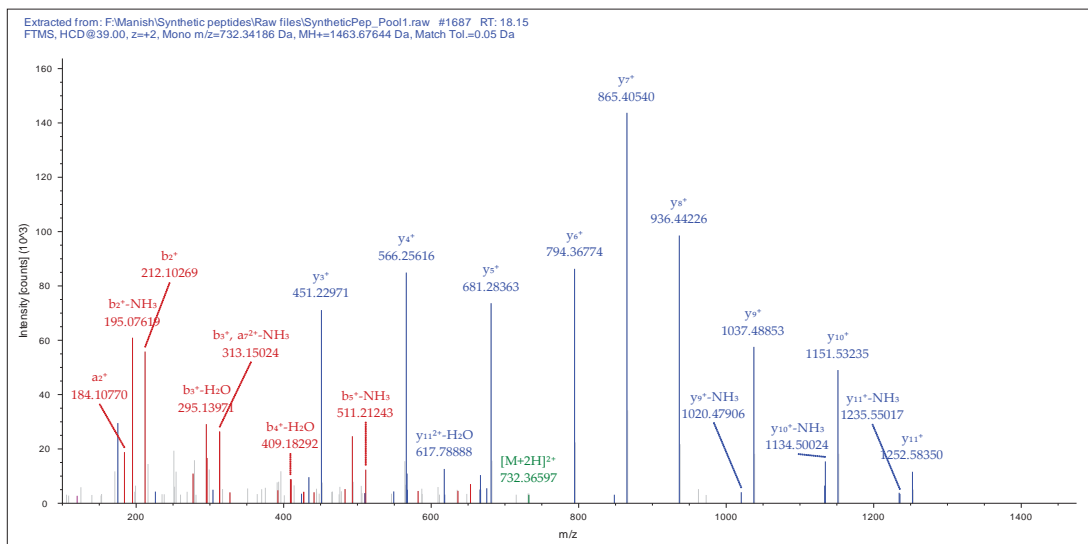



# NQLSLIAHTVQYTSR

Experiment

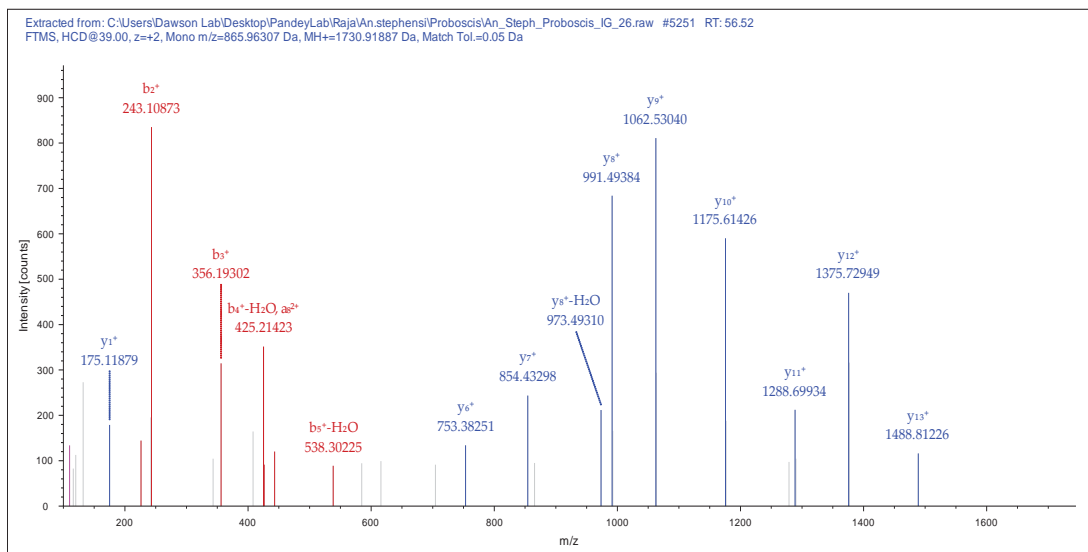

Validated

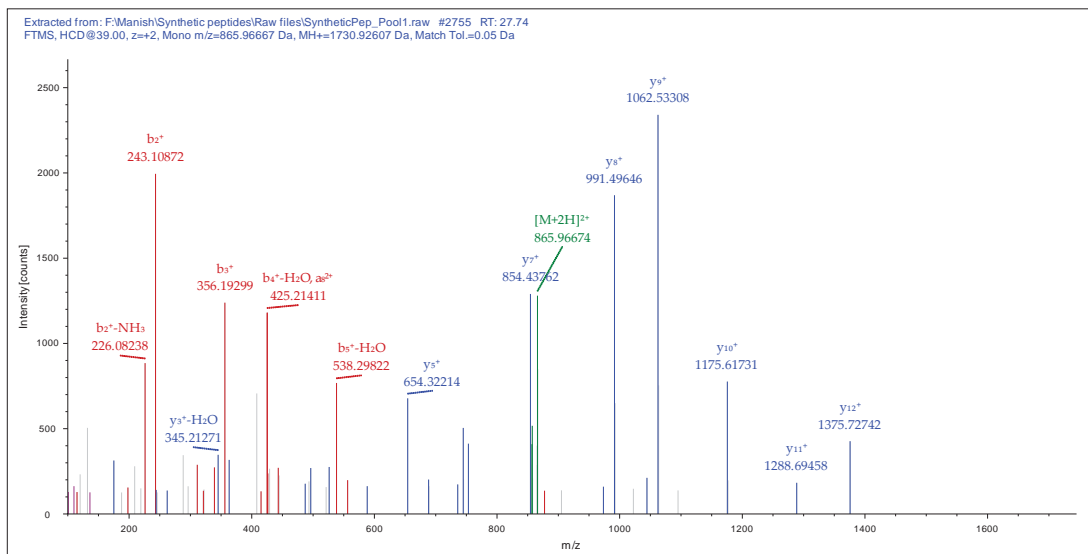

# QFIDSYFSSFTNDPVR

Experiment

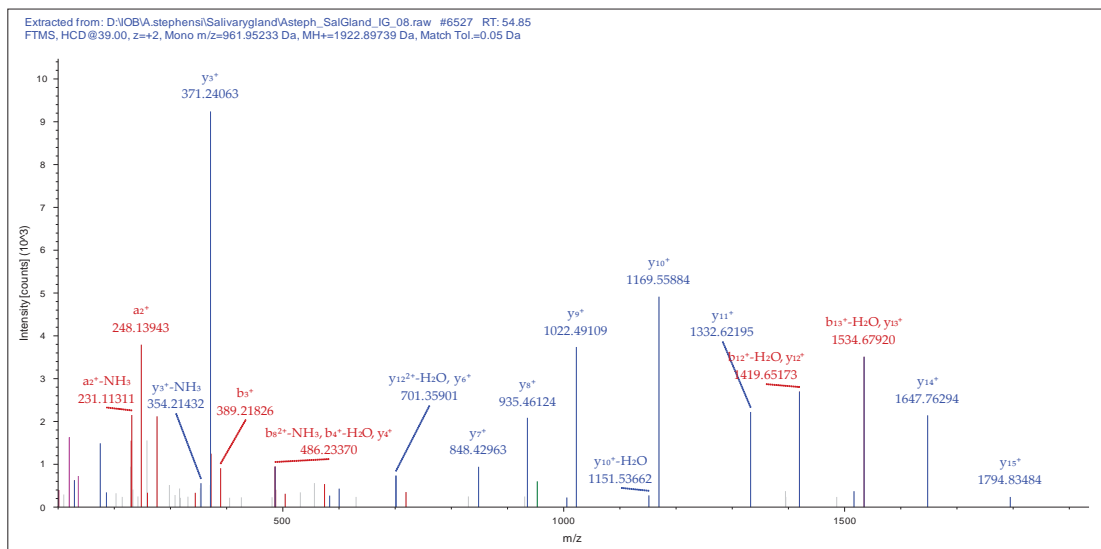

Validated

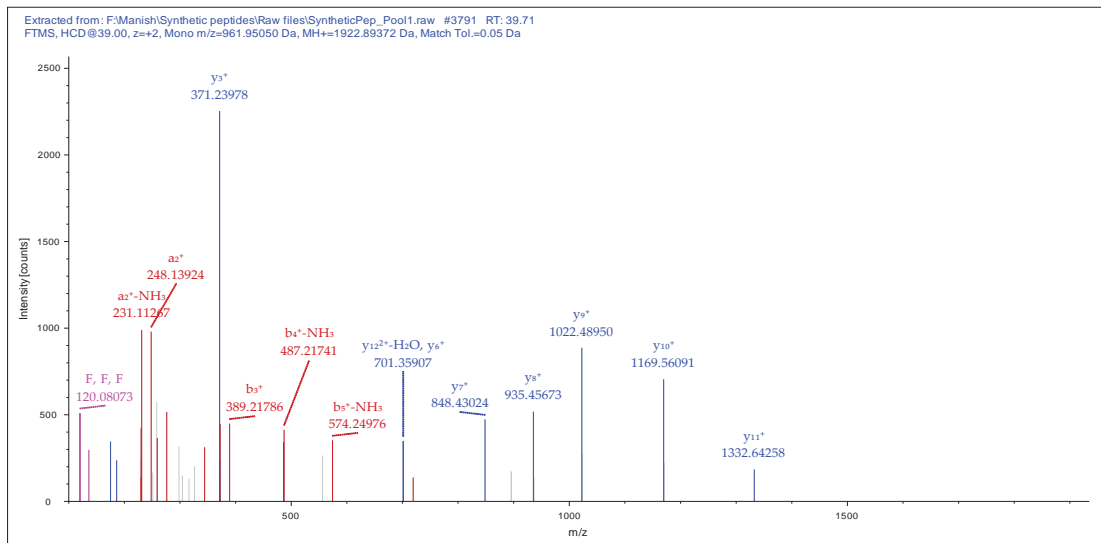

# QLYQTLSDYDIR

Experiment

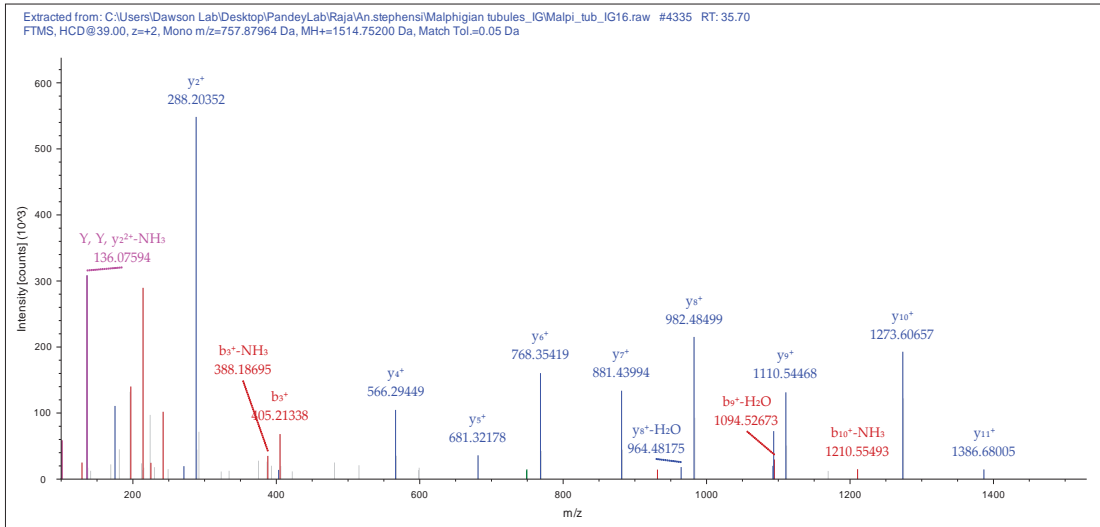

Validated

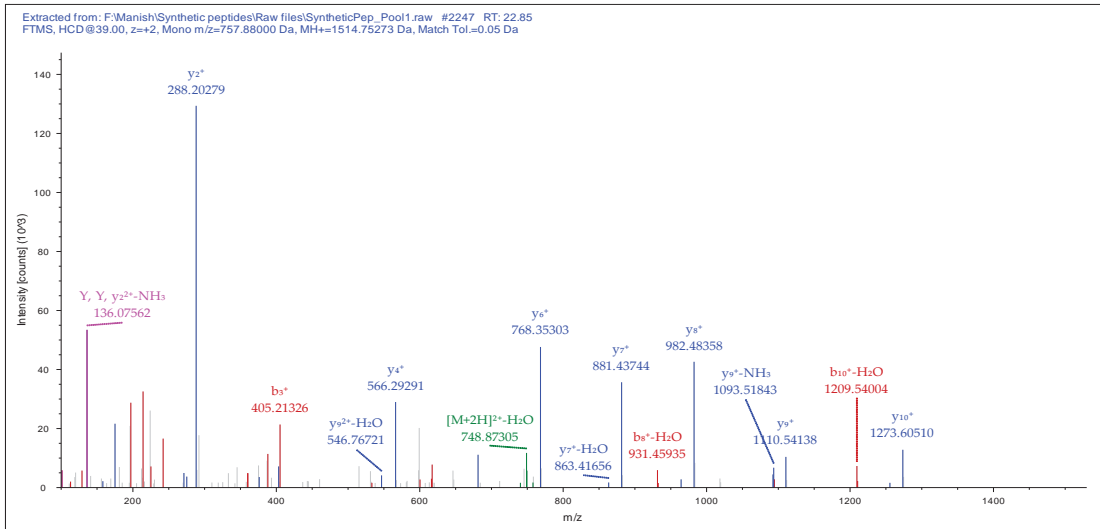

# SGPGHFDQTSVGIR

Experiment

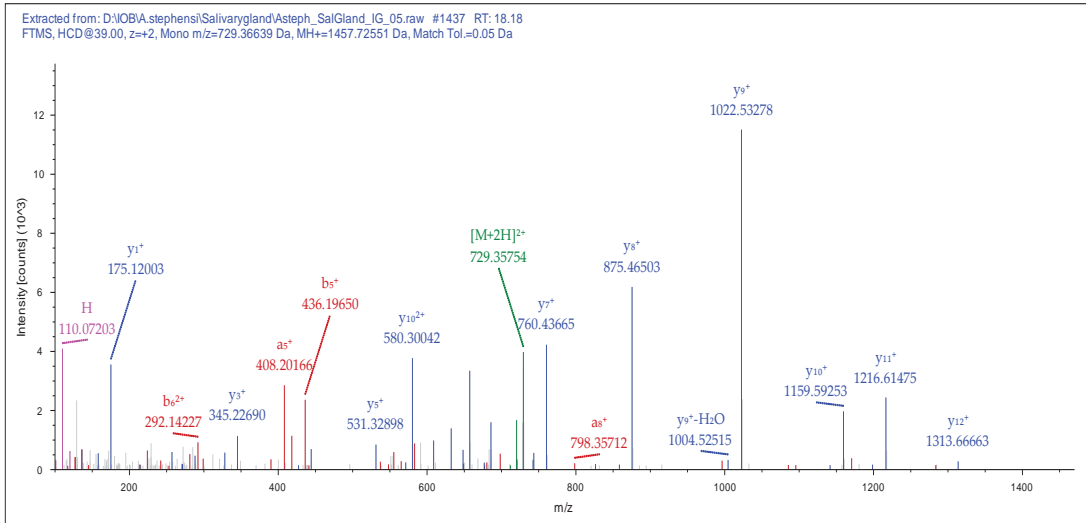

Validated

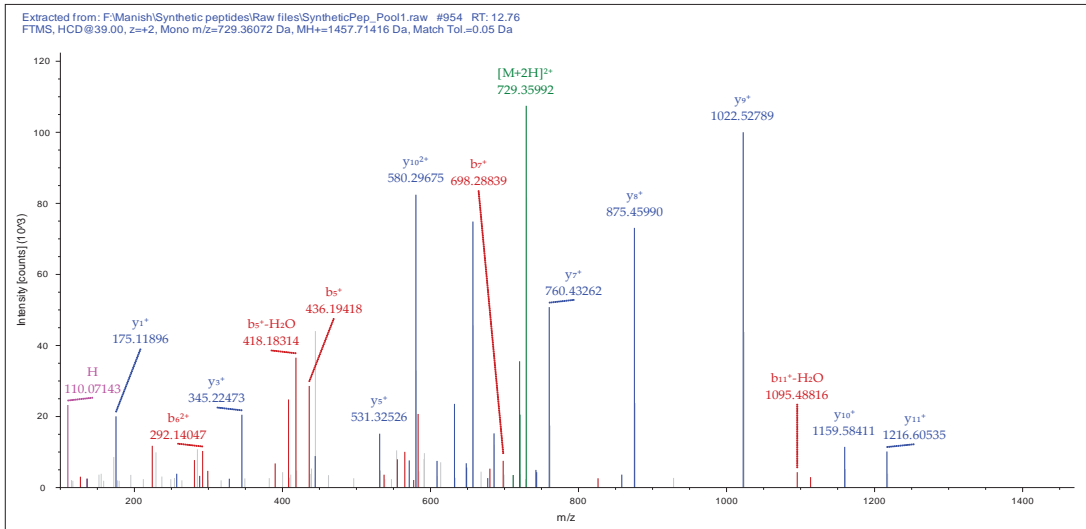

# SLASLLQLTDVVR

Experiment

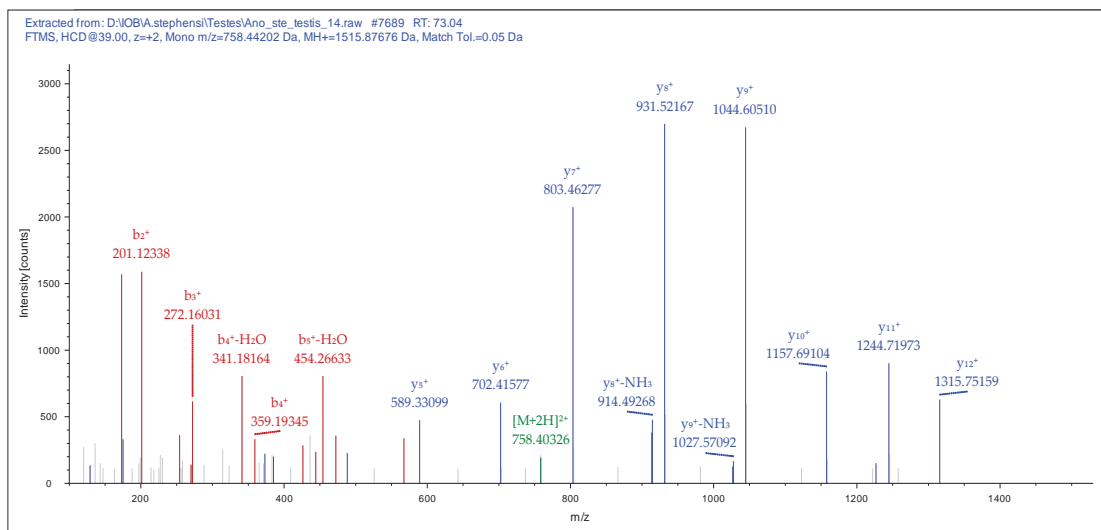

Validated

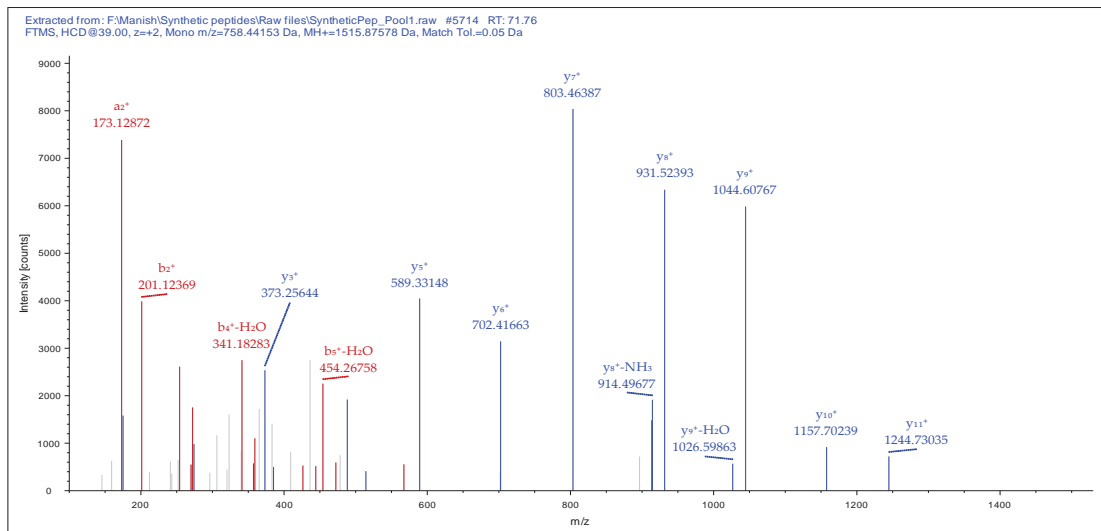

# SSLIHAILGELPLESGSIK

Experiment

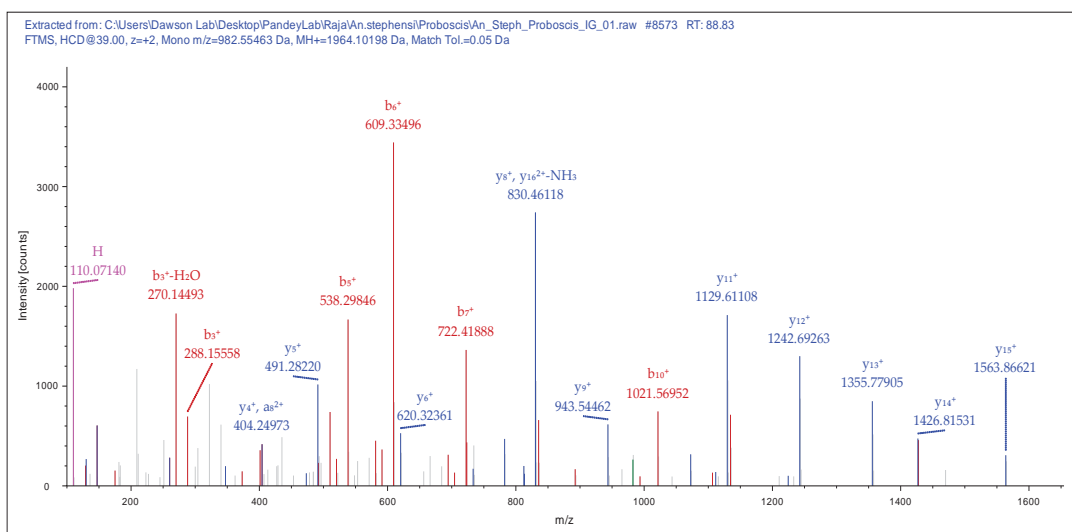

Validated

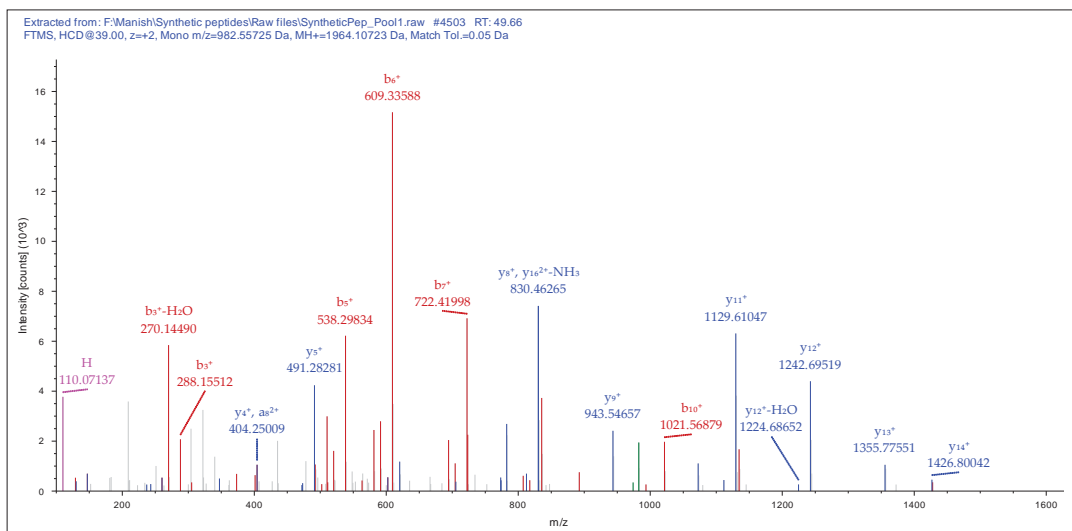

# TFPALVYFR

Experiment

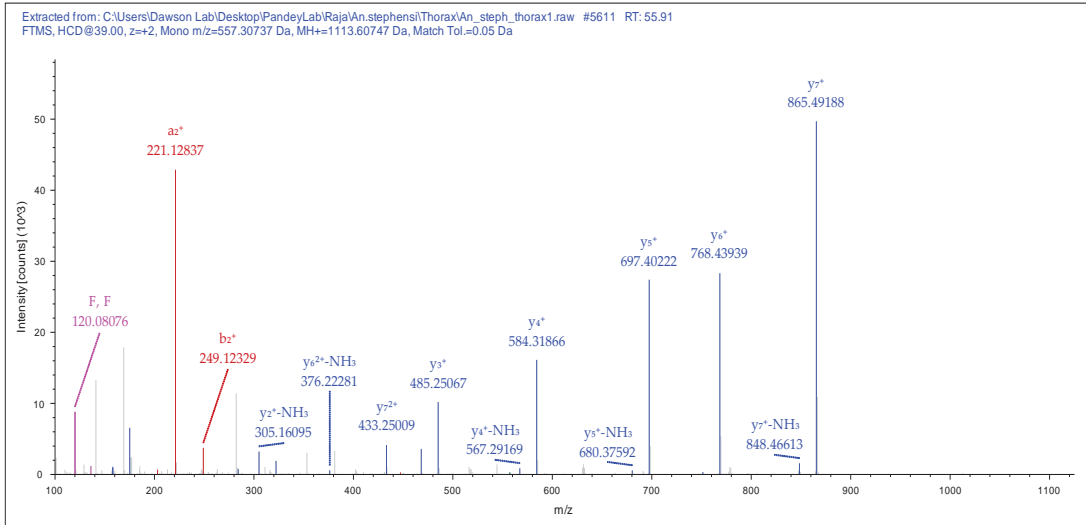

Validated

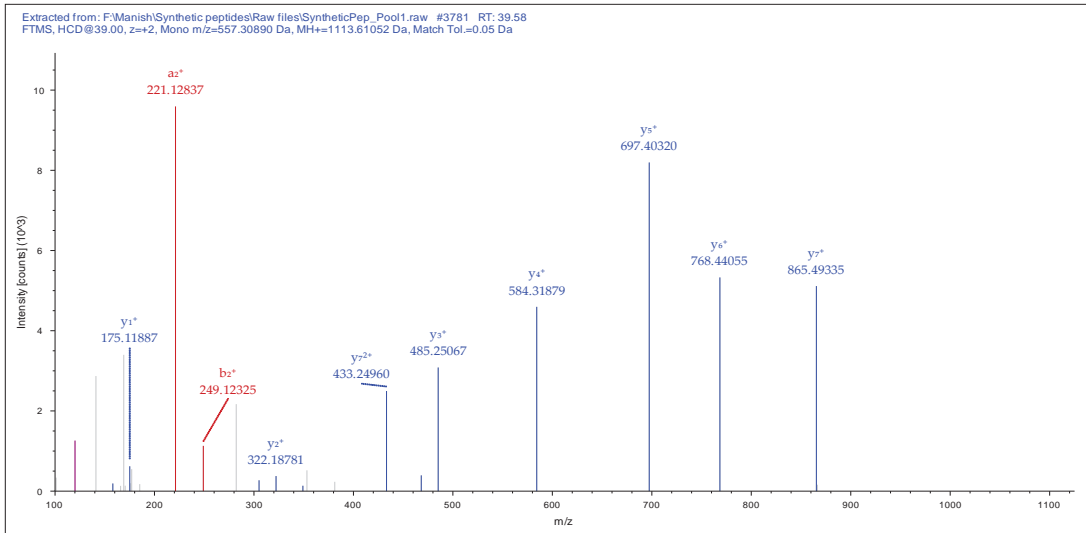

# TIPDNFLSSAANLLR

Experiment

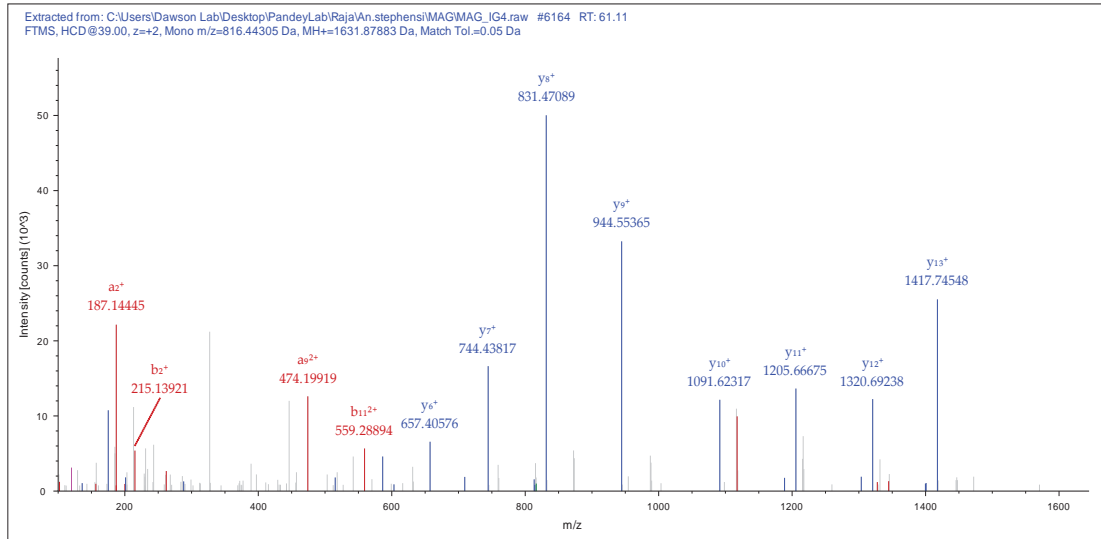

Validated

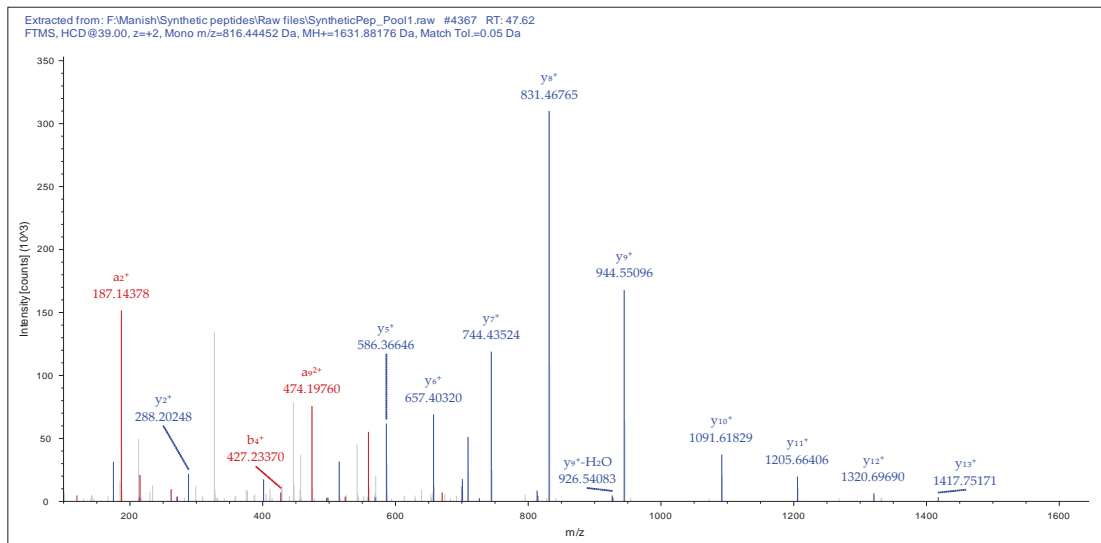



# TPPELLYSSYR

Experiment

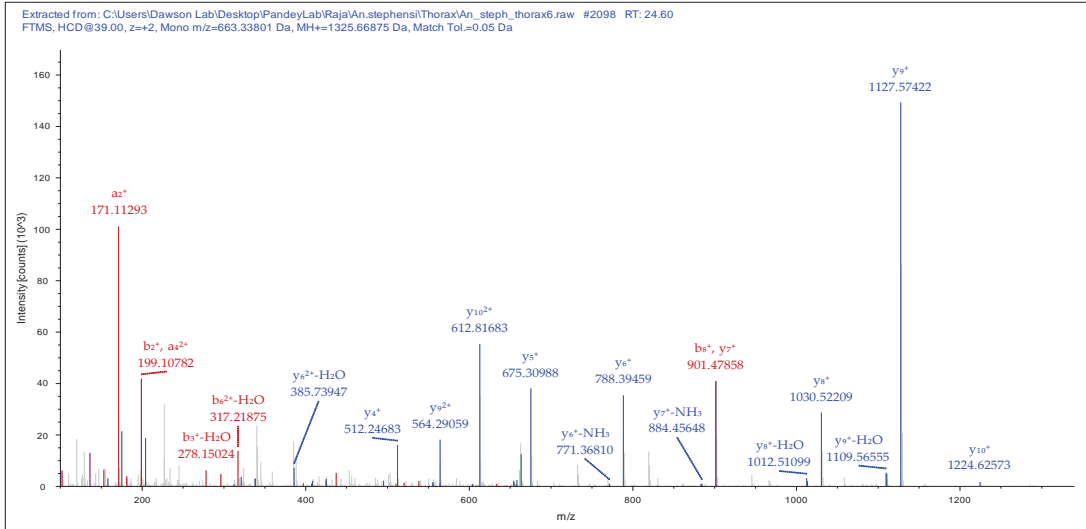

Validated

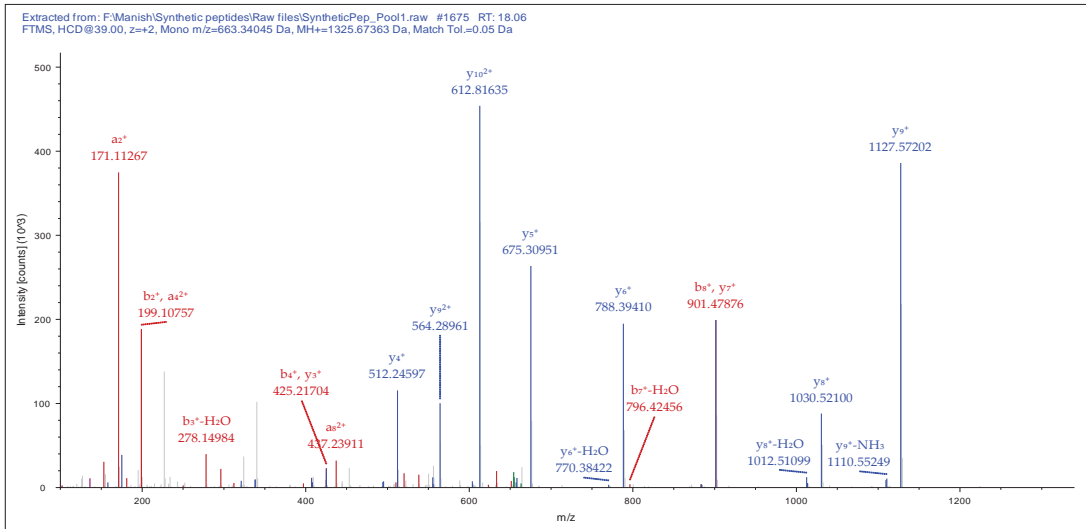

# TSDGSQATSNVVR

Experiment

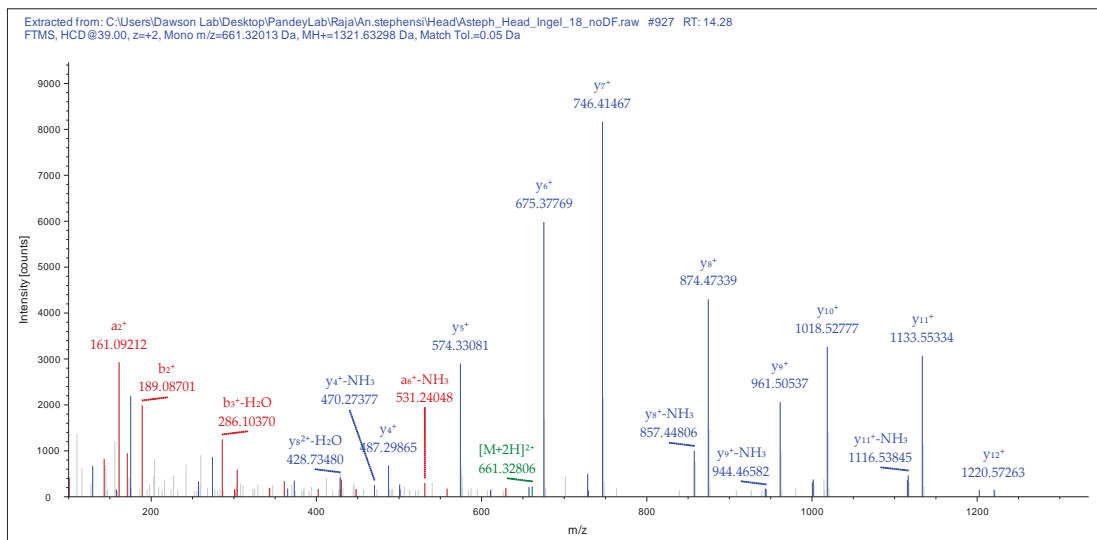

Validated

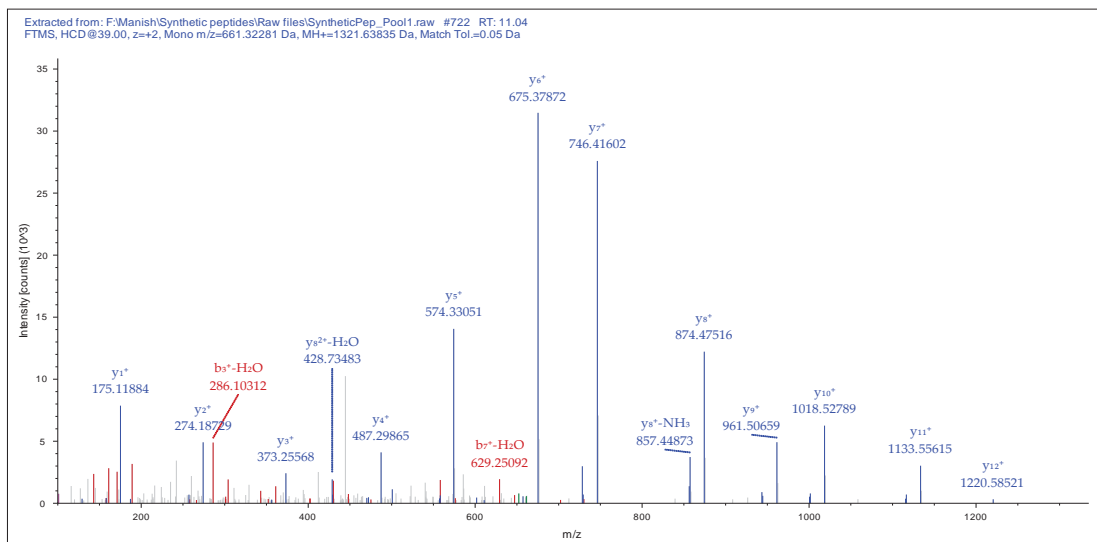

# GQYSWVDADGIR

Experiment

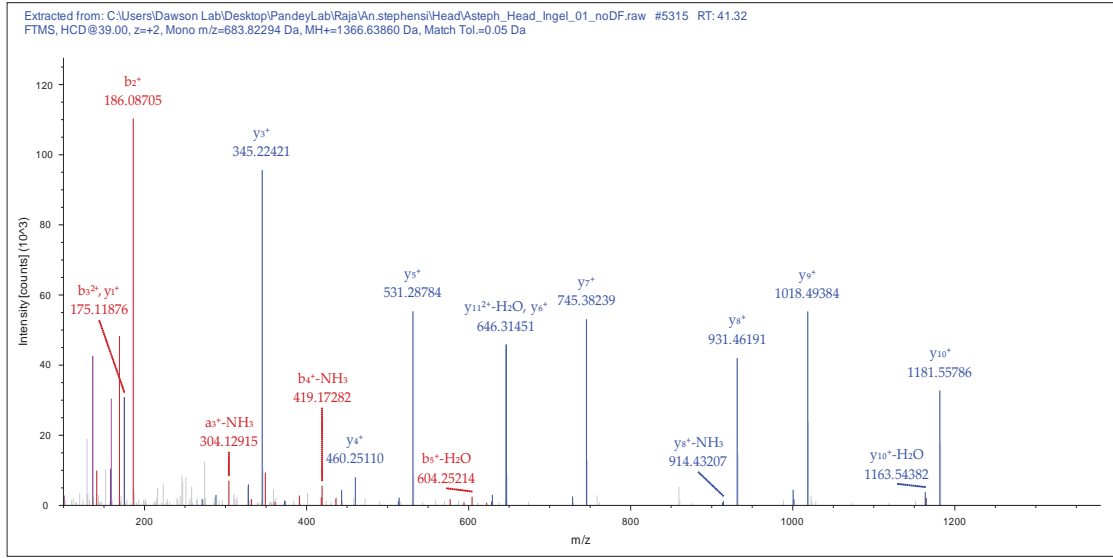

Validated

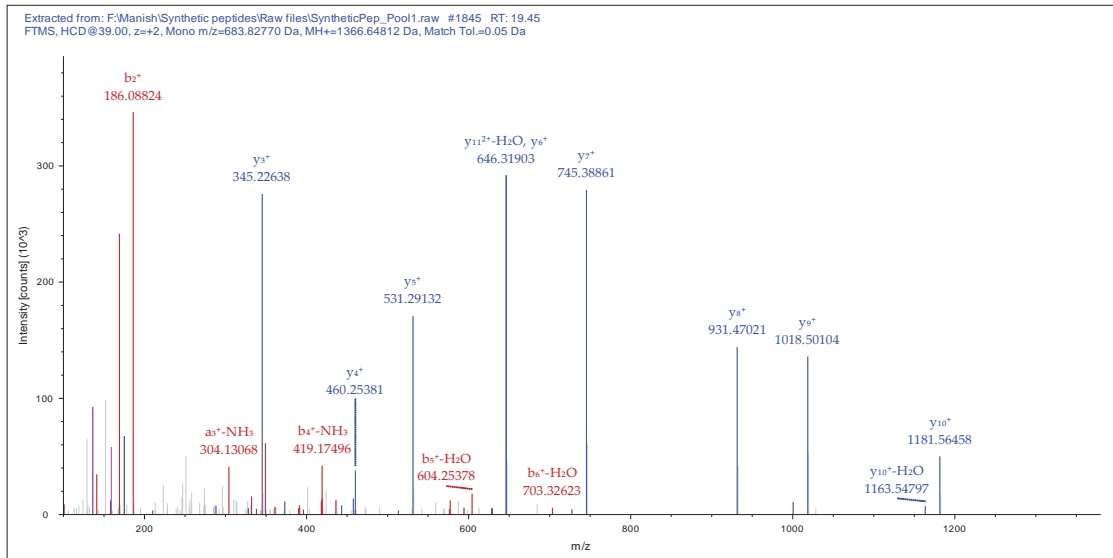

# VAAHYQISALNK

Experiment

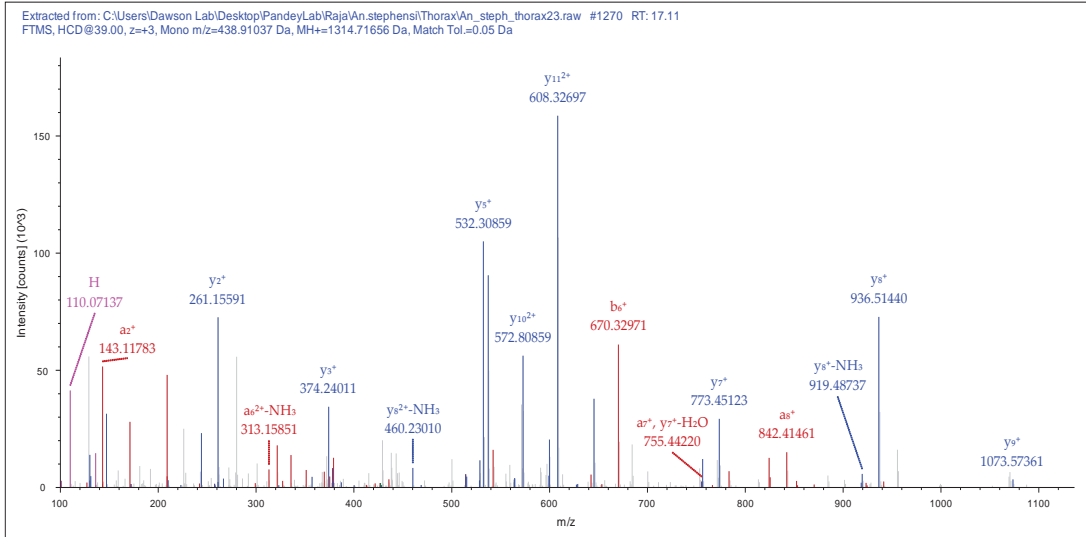

Validated

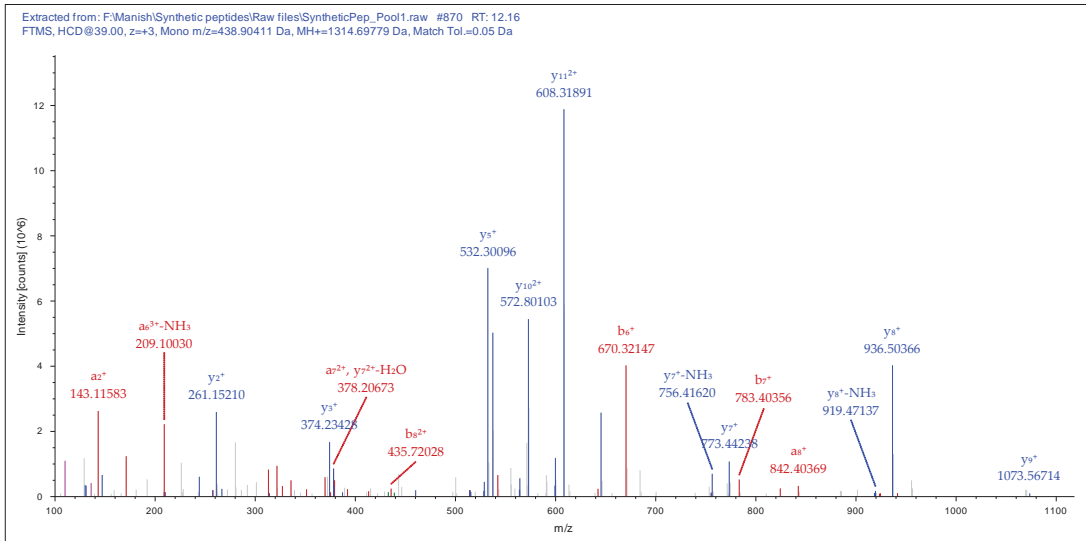

# VFTYDFGPHIQVPTK

Experiment

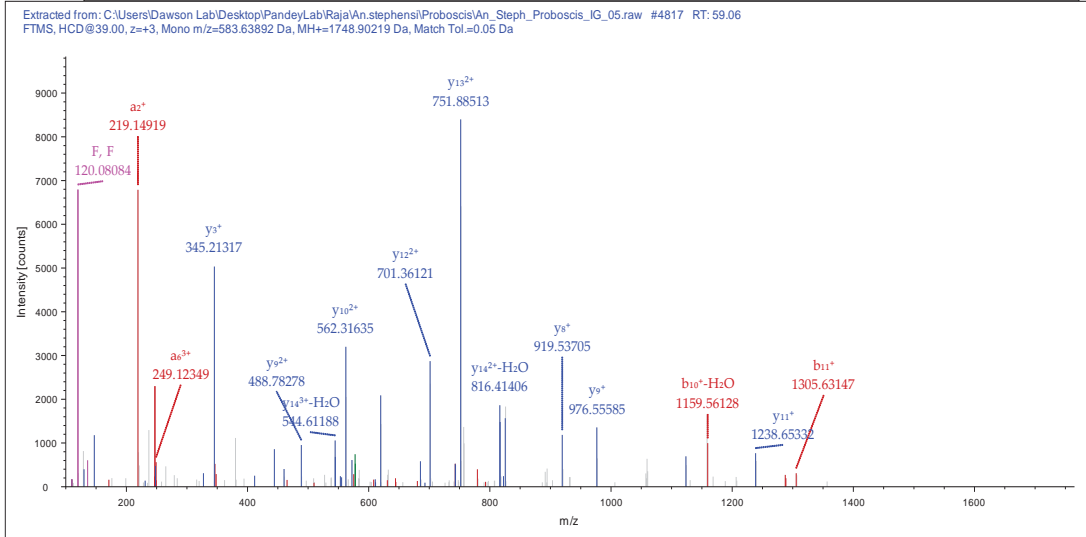

Validated

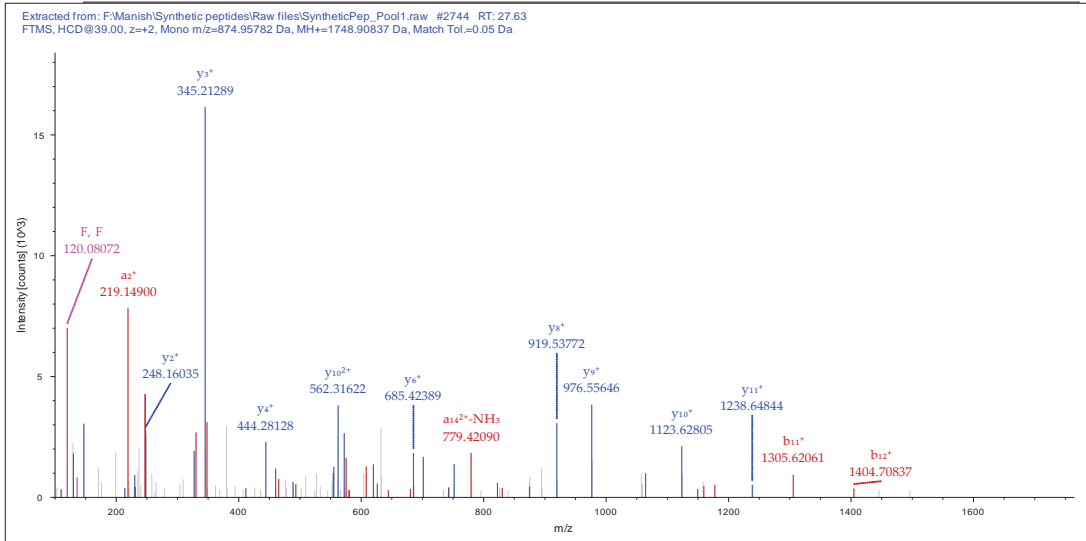

# VLNHGDFWTNNILFK

Experiment

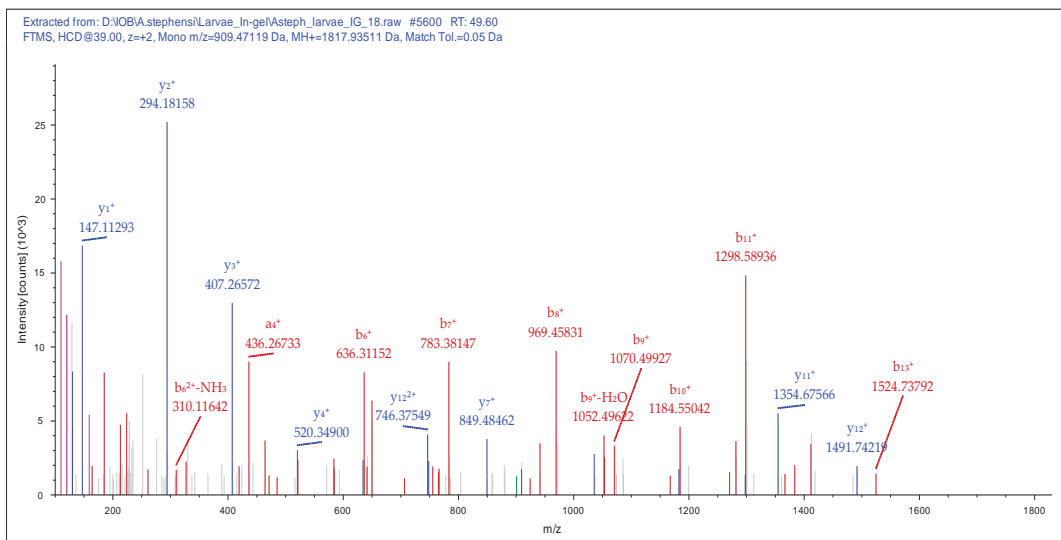

Validated

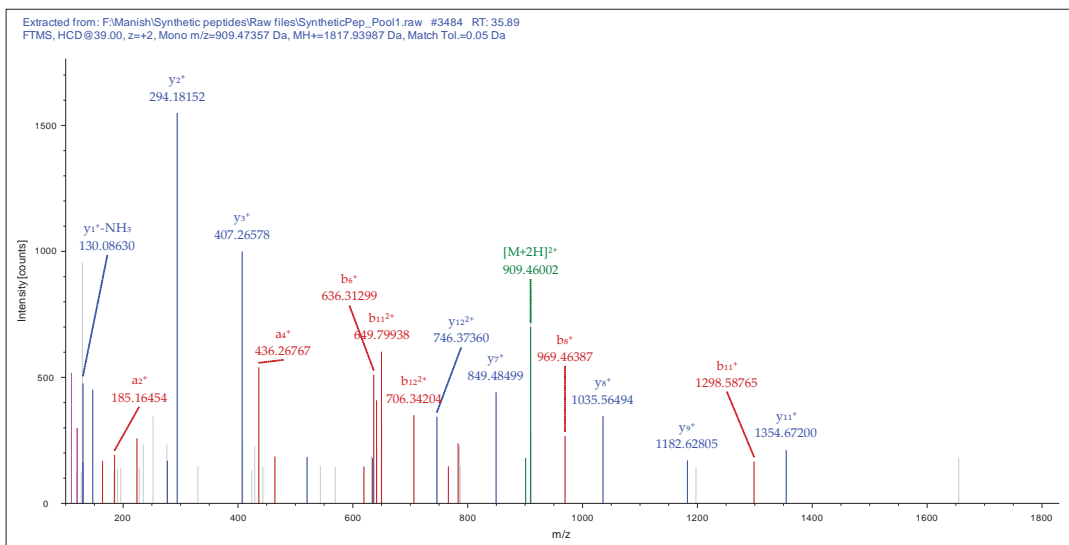

# VSTISQLVQQMFR

Experiment

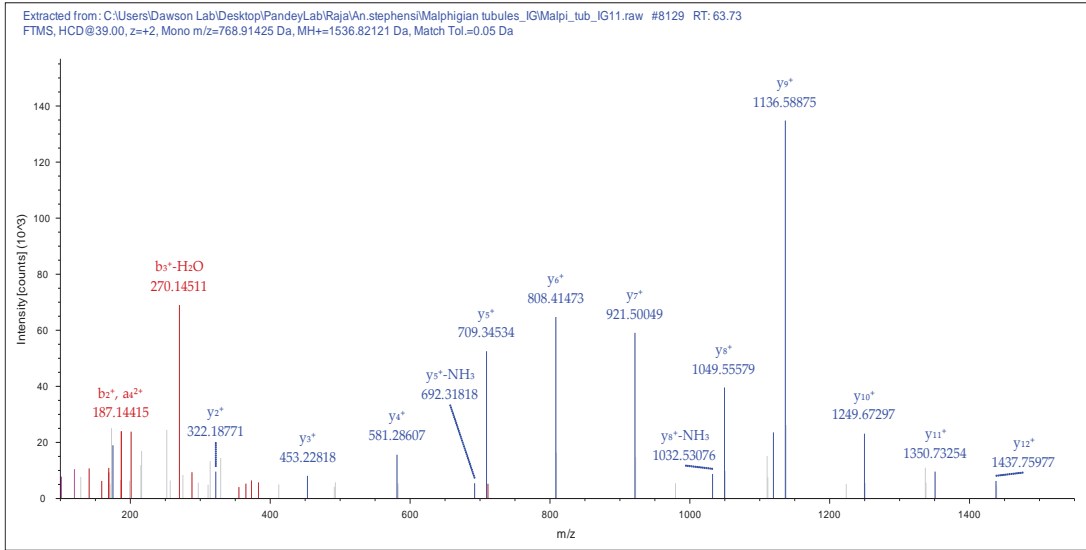

Validated

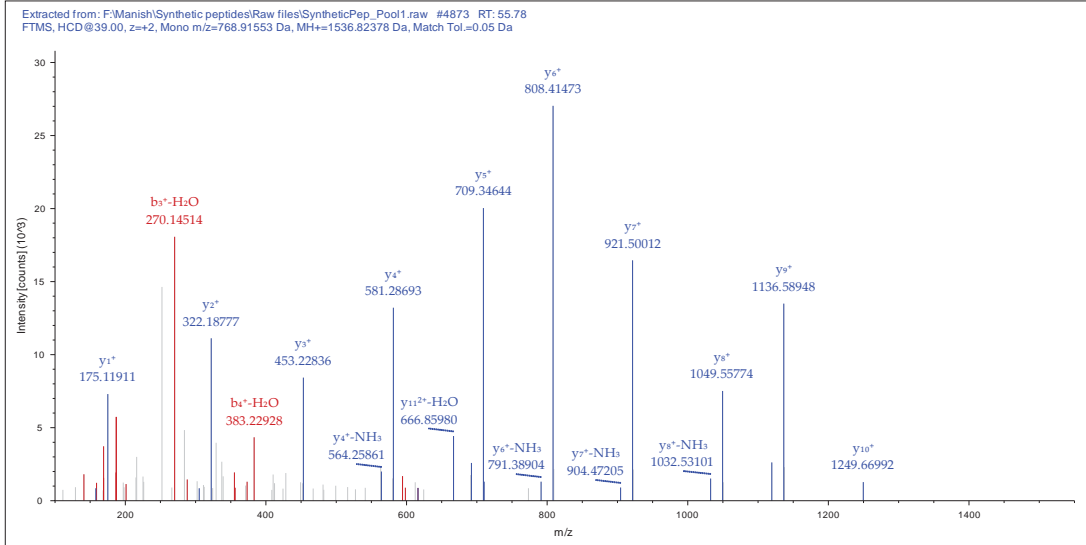

# VVEVGPYVYFQYR

Experiment

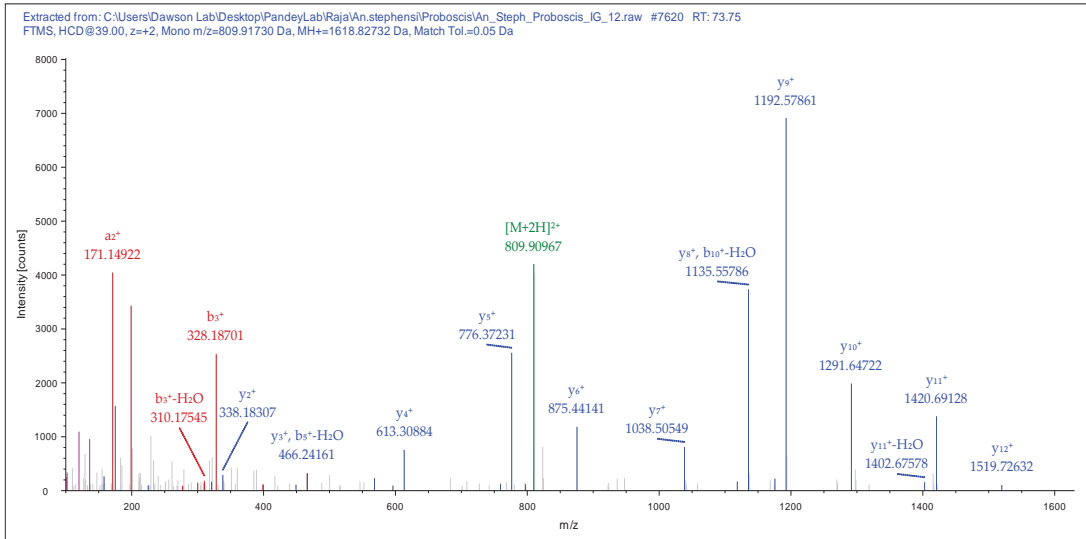

Validated

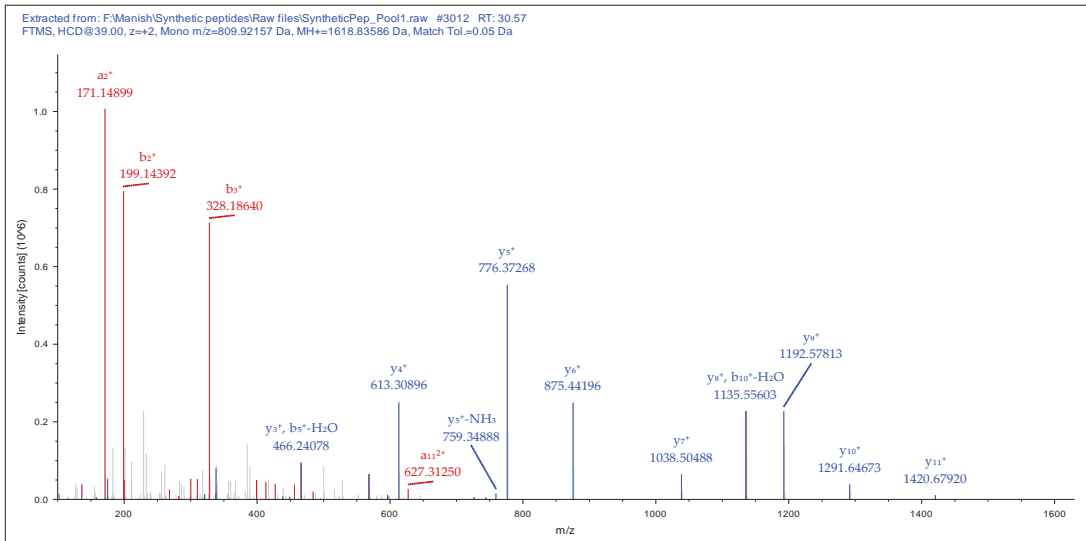



# VYADVNSHKPR

Experiment

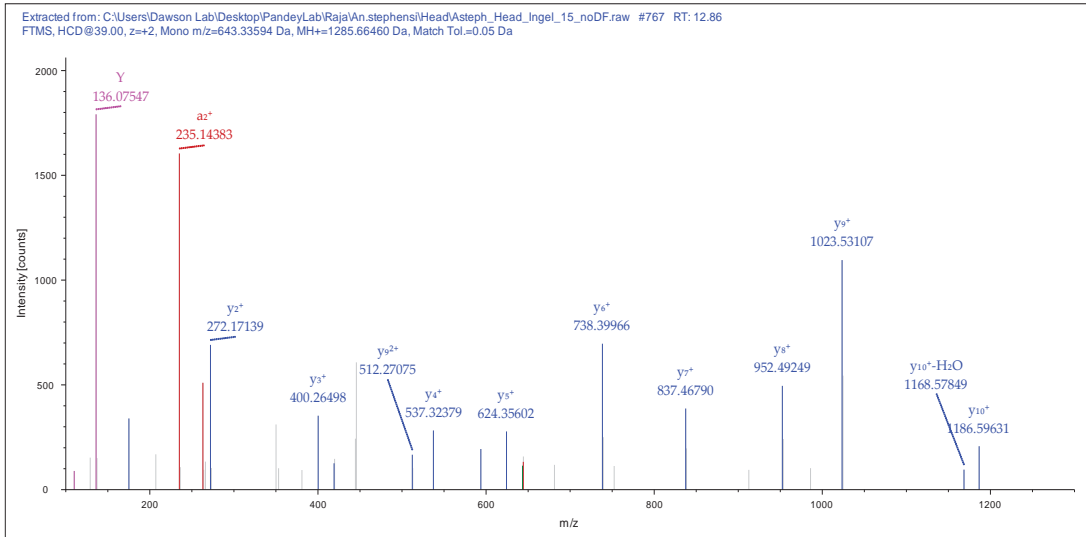

Validated

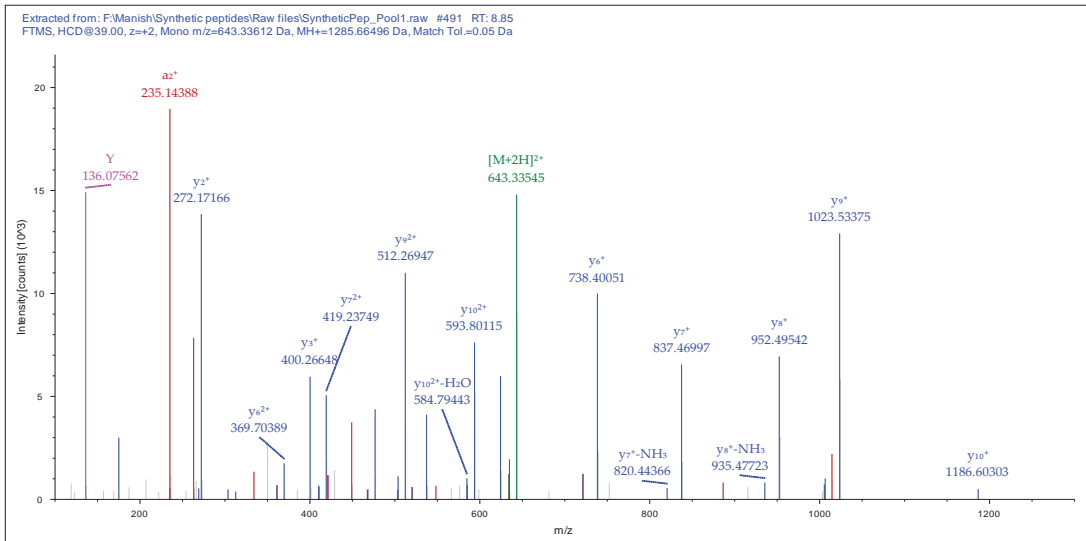

# YFAQGSATWENEK

Experiment

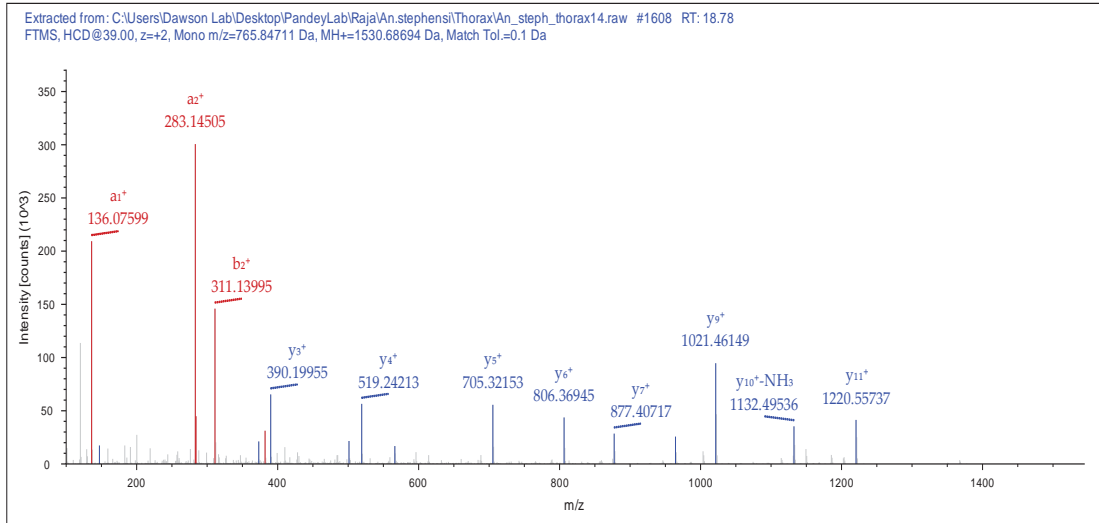

Validated

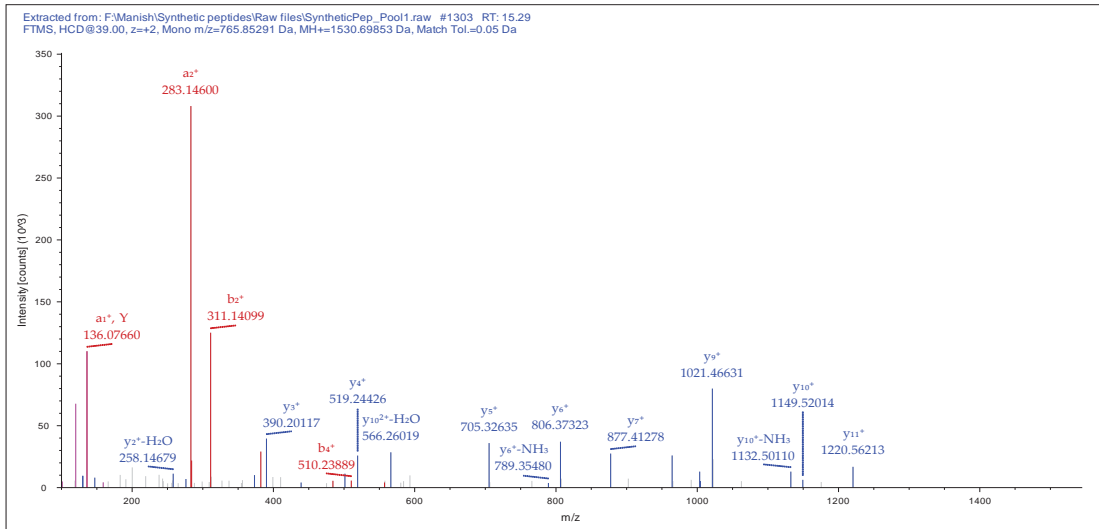

# ADTAFFWEER

Experiment

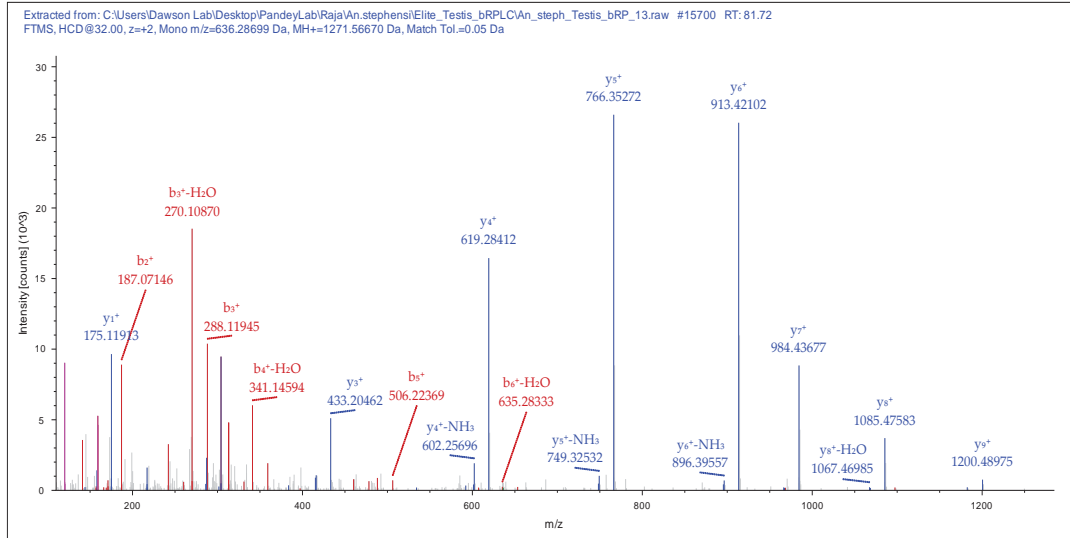

Validated

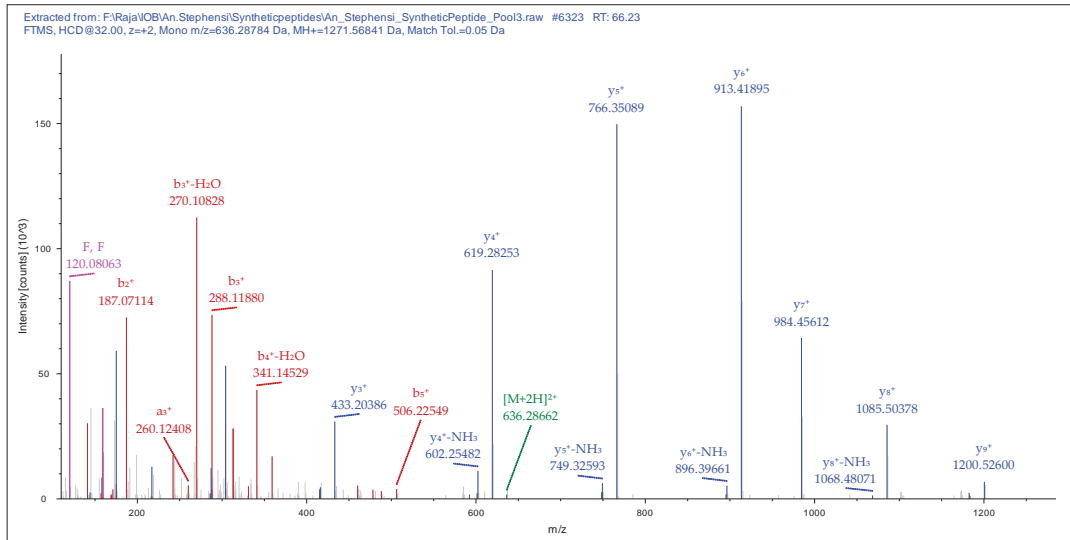

# KAYAADGHEVLDR

Experiment

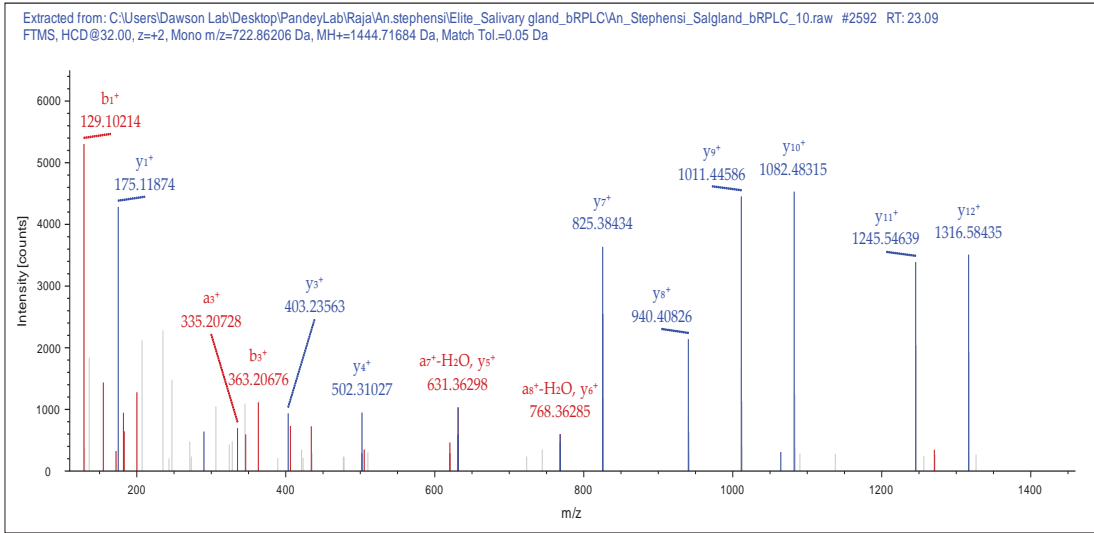

Validated

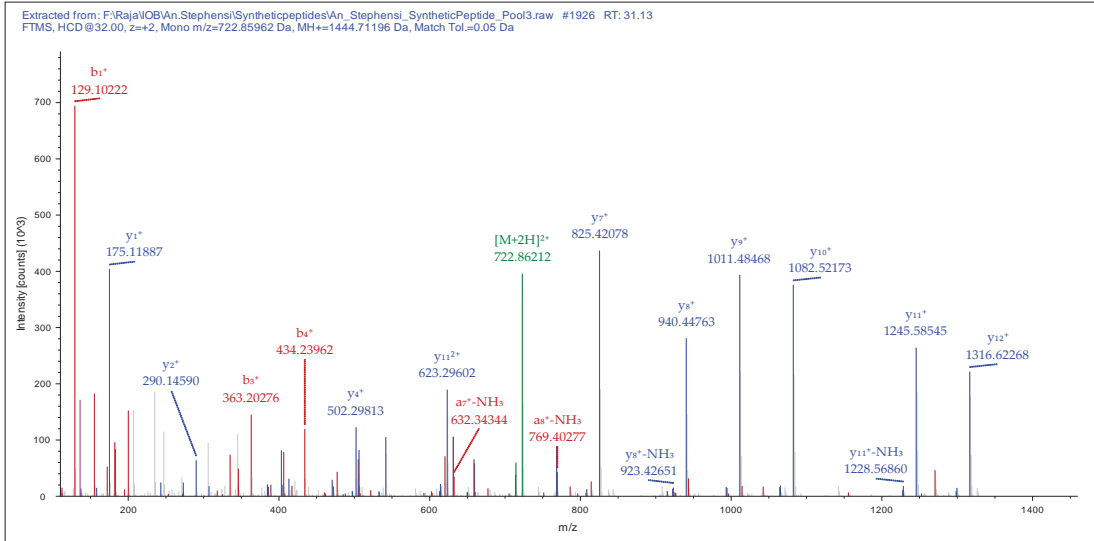

# DDTYTAHAGAK

Experiment

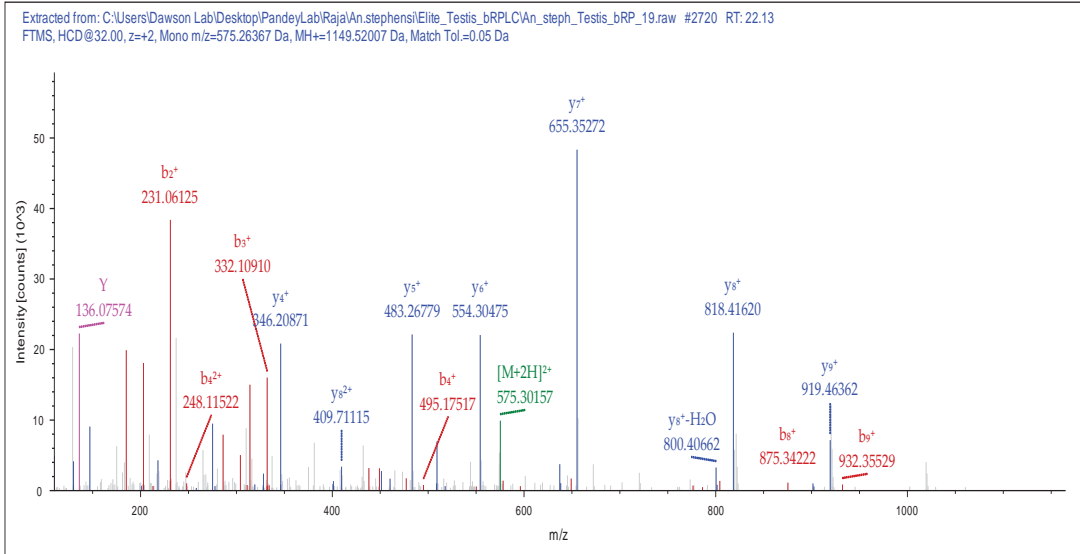

Validated

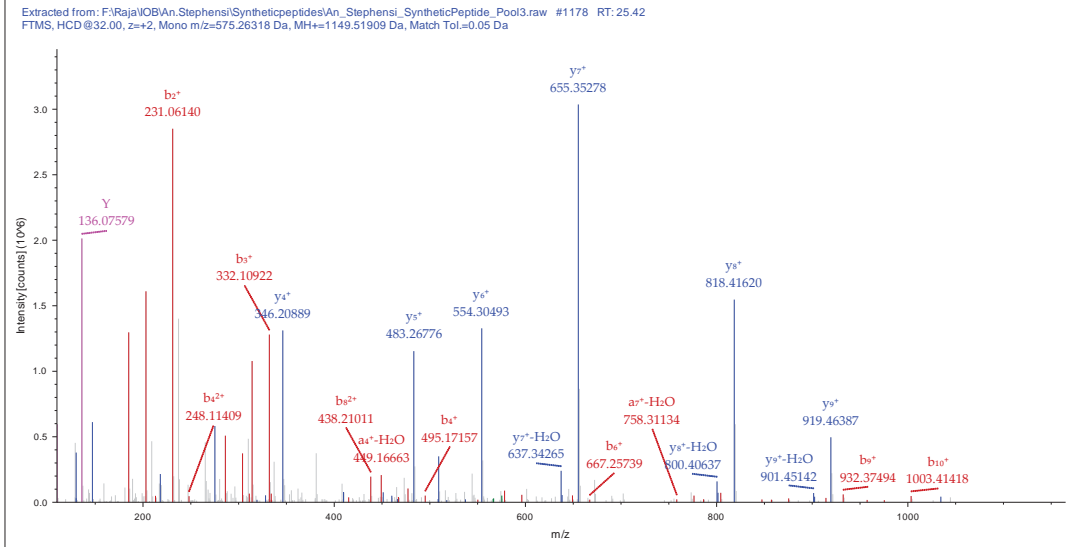

# DGVPVQPDENSNR

Experiment

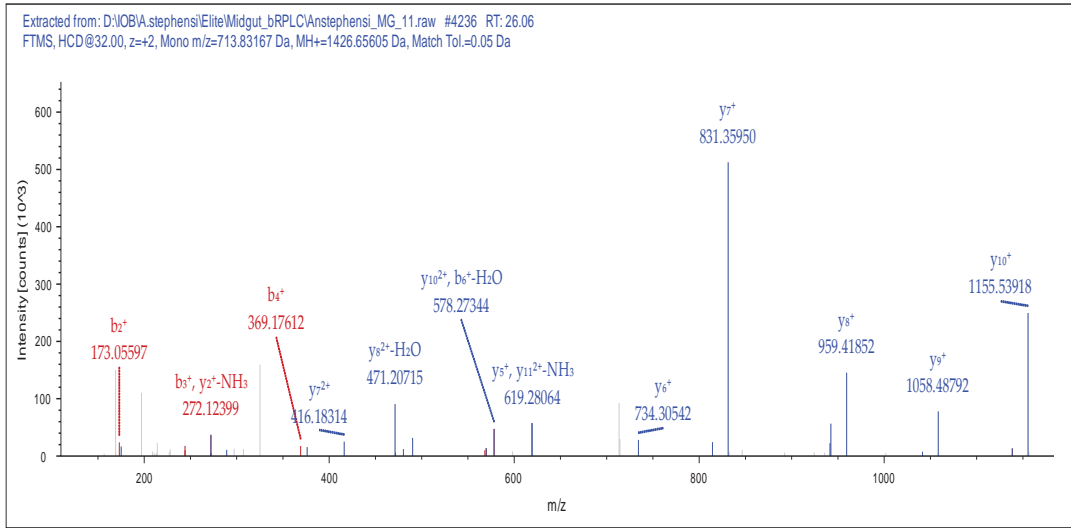

Validated

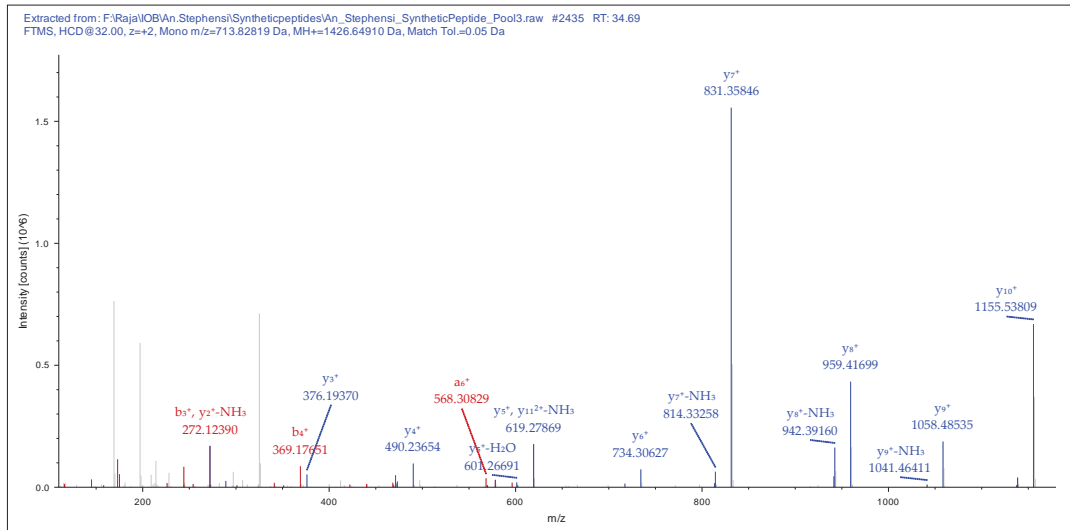

# EEINILFDNR

Experiment

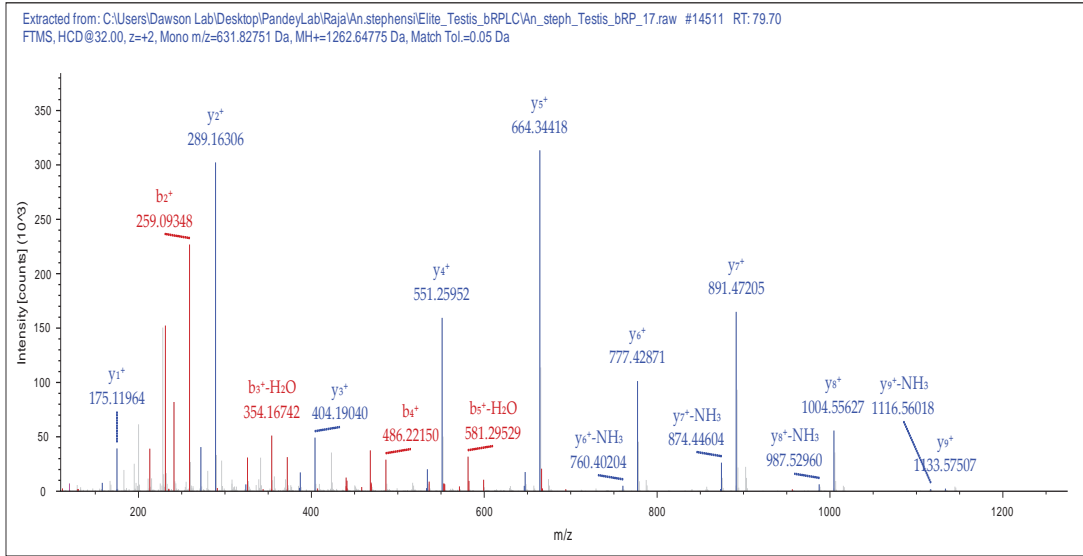

Validated

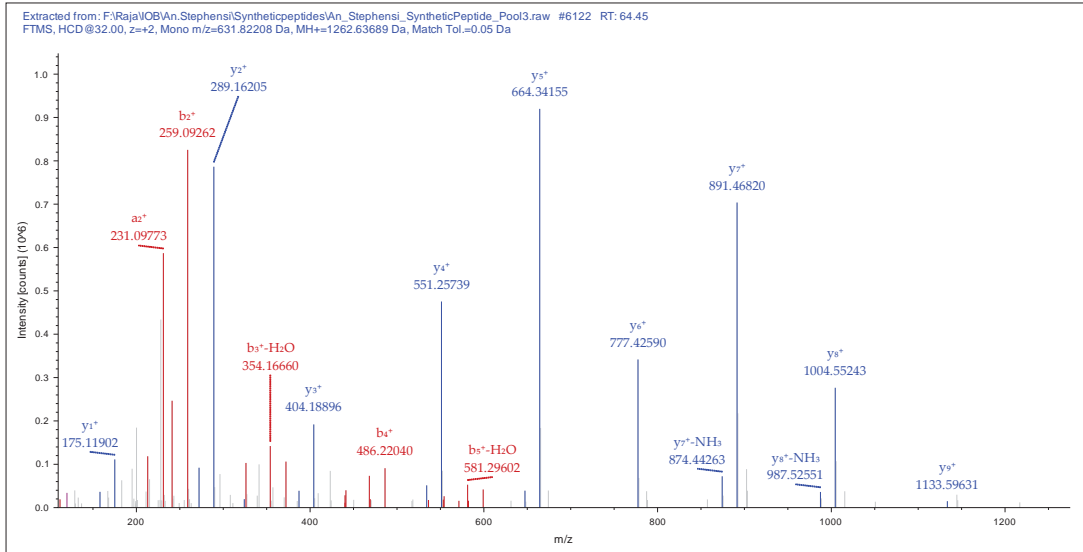

# ELNELQAIVGR

Experiment

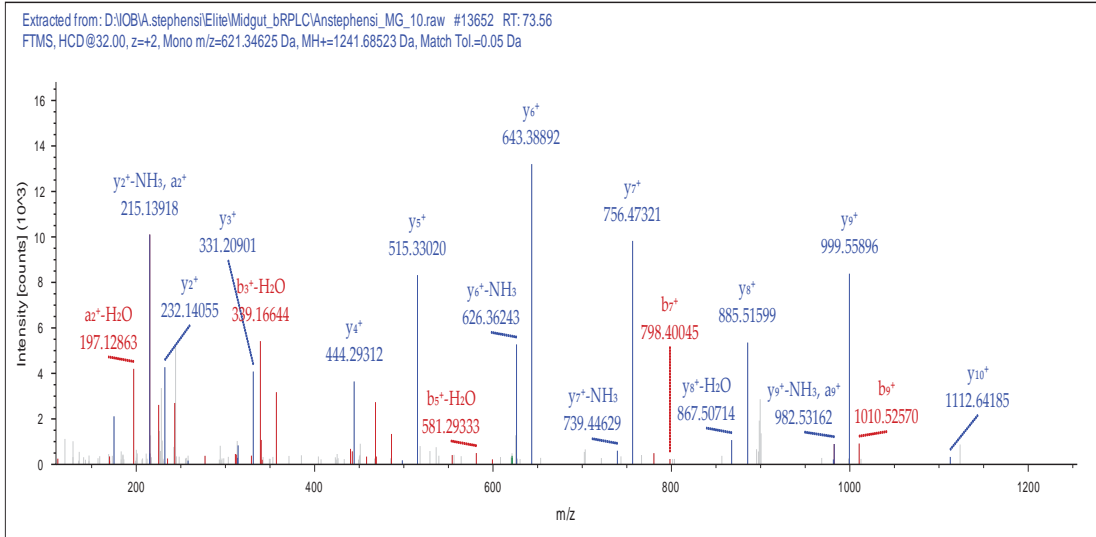

Validated

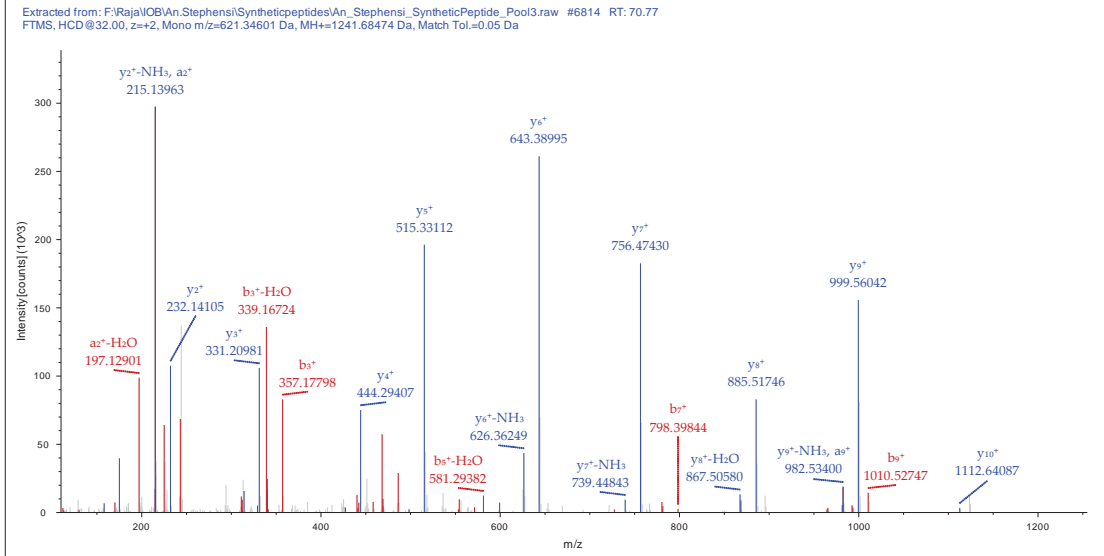



# FFETNPSGR

Experiment

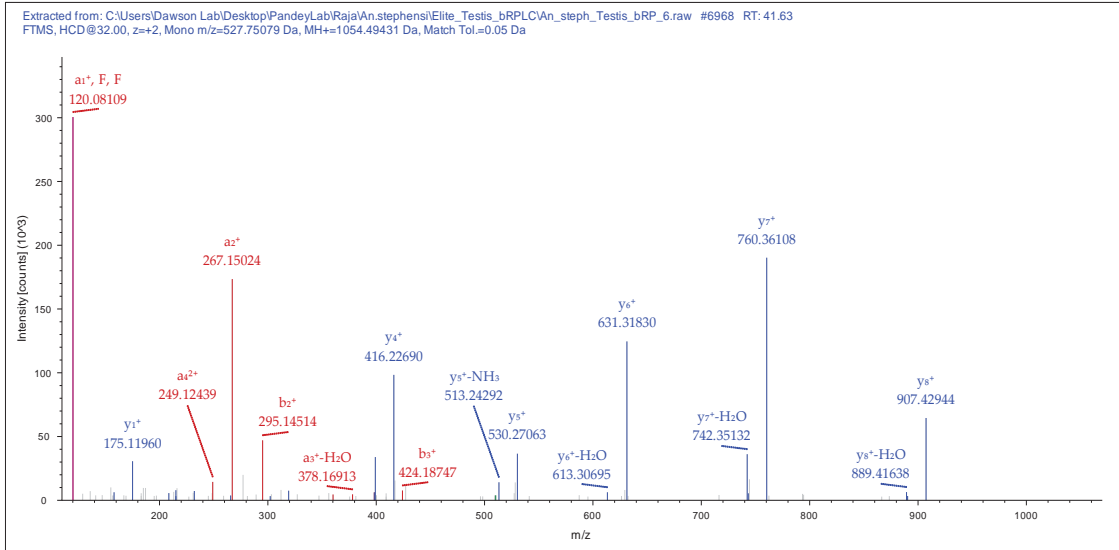

Validated

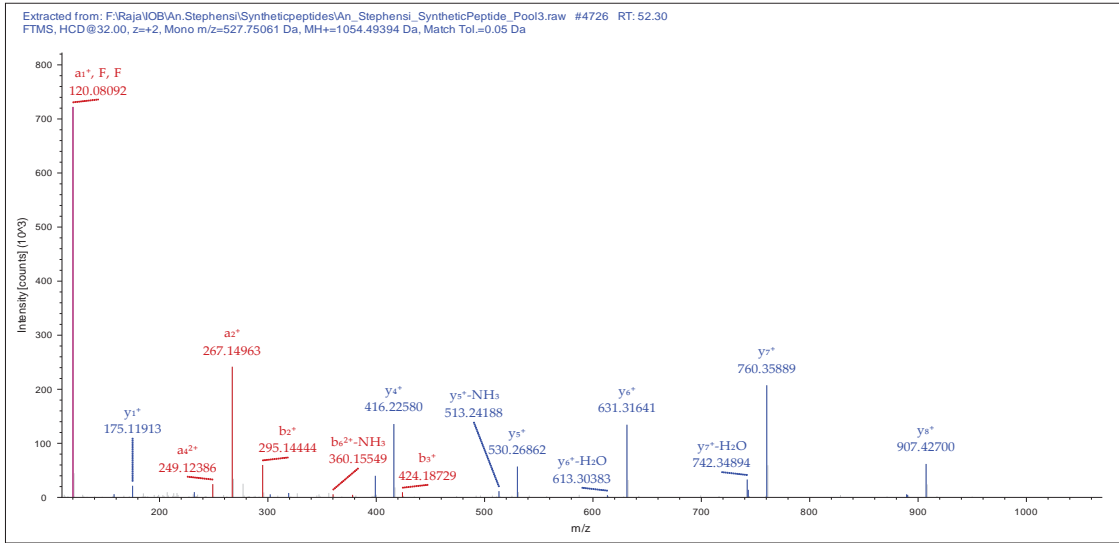

# FLEEQENSTGFGDR

Experiment

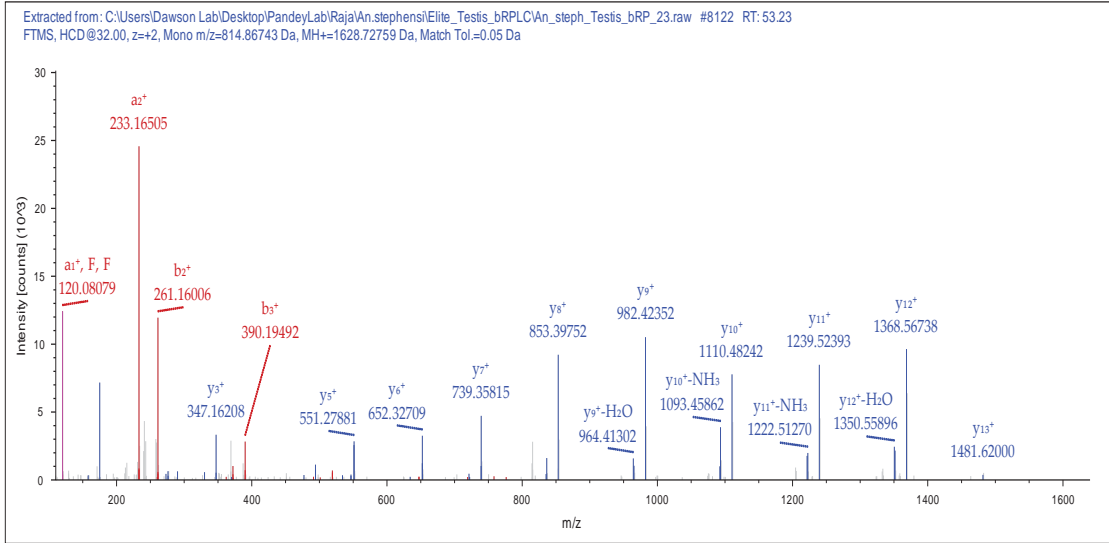

Validated

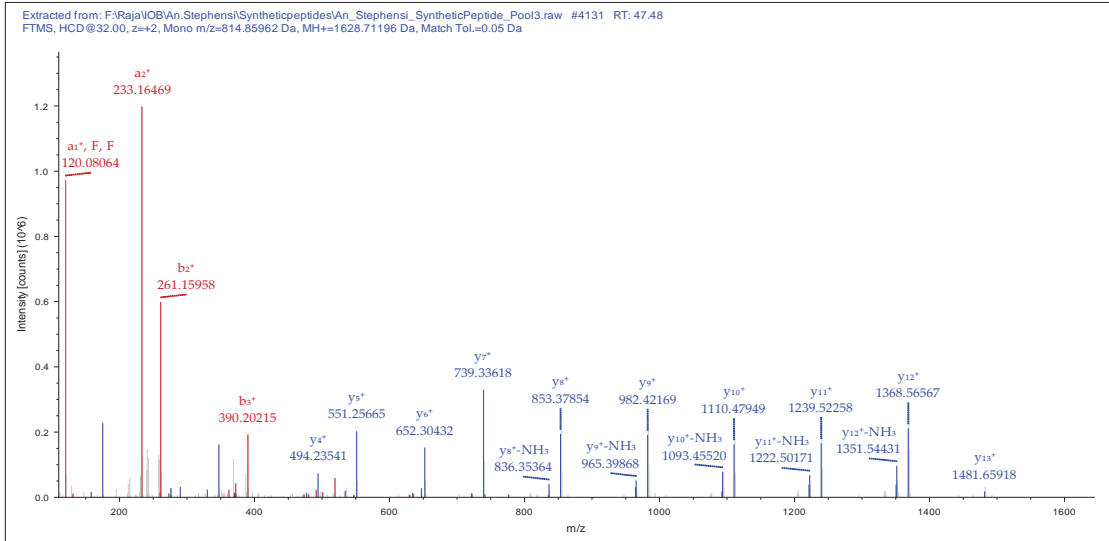

# GGTPTSAATTPPAK

Experiment

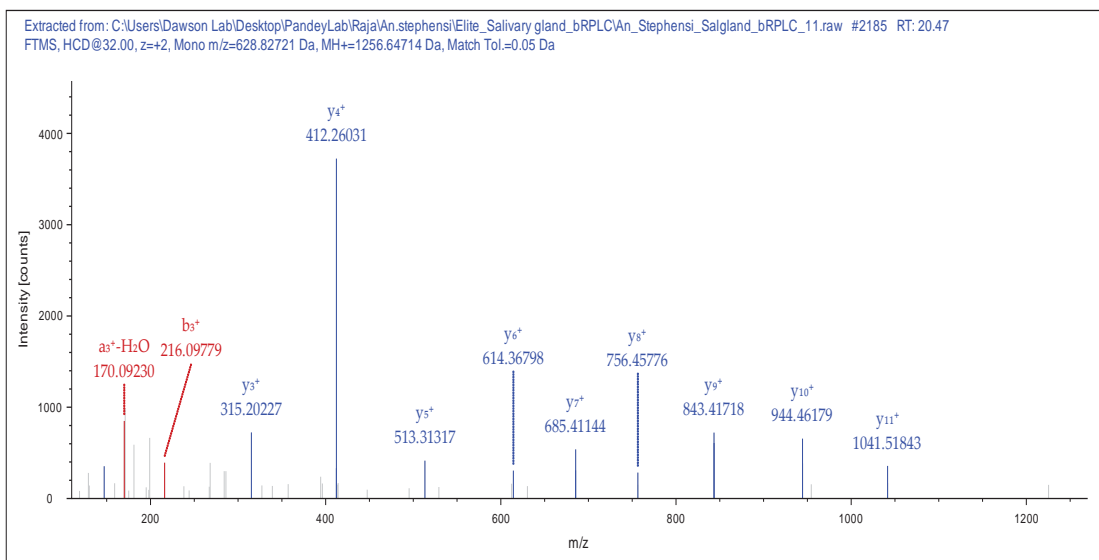

Validated

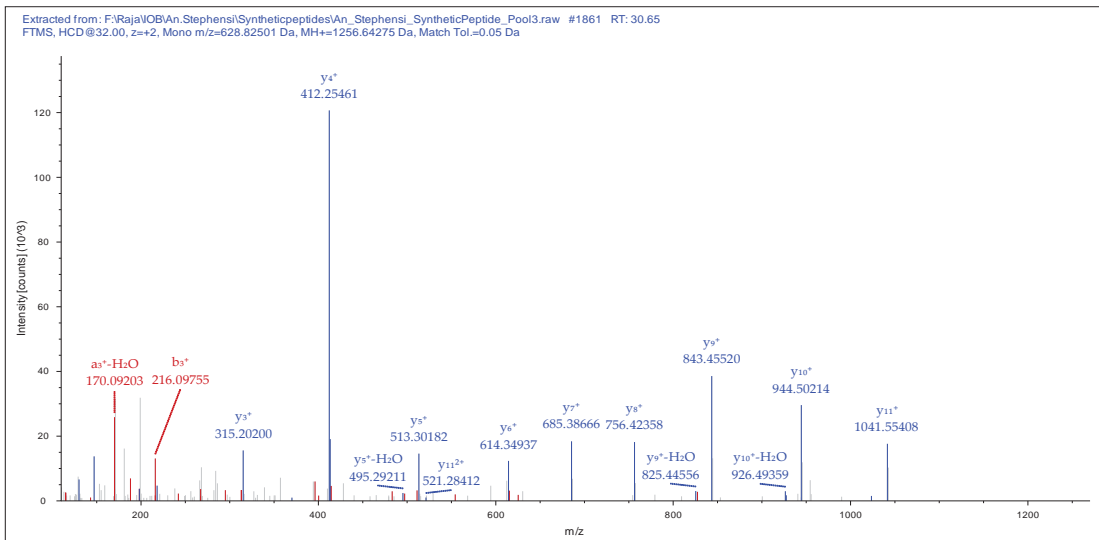

# GSQITDDEIR

Experiment

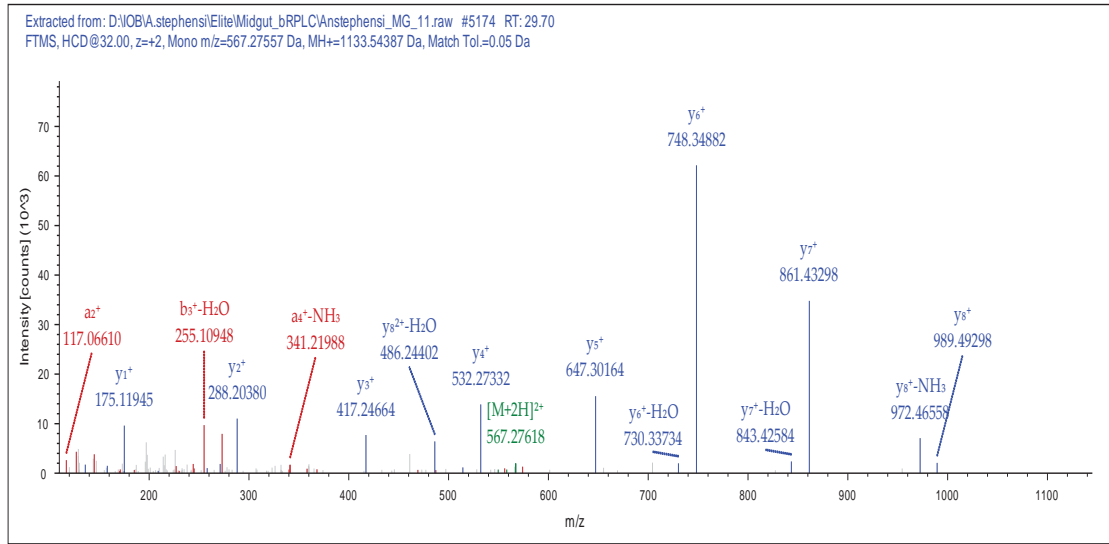

Validated

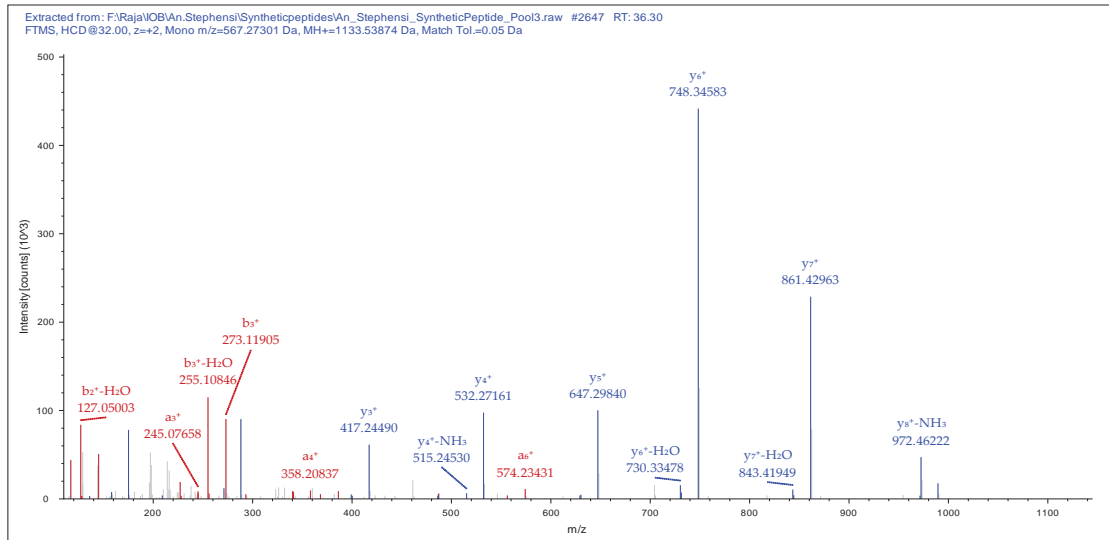

# HIEAGA EK

Experiment

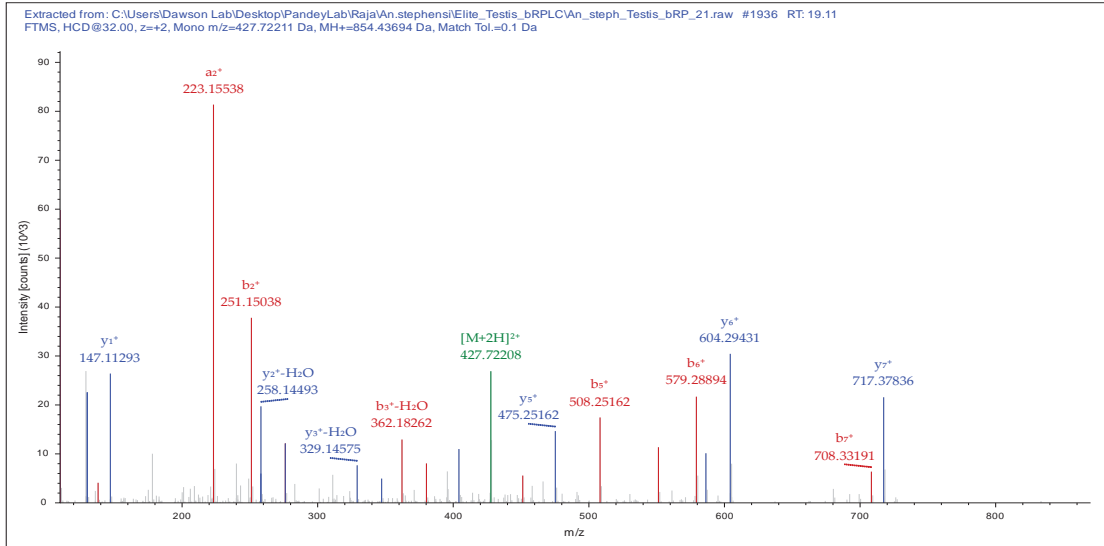

Validated

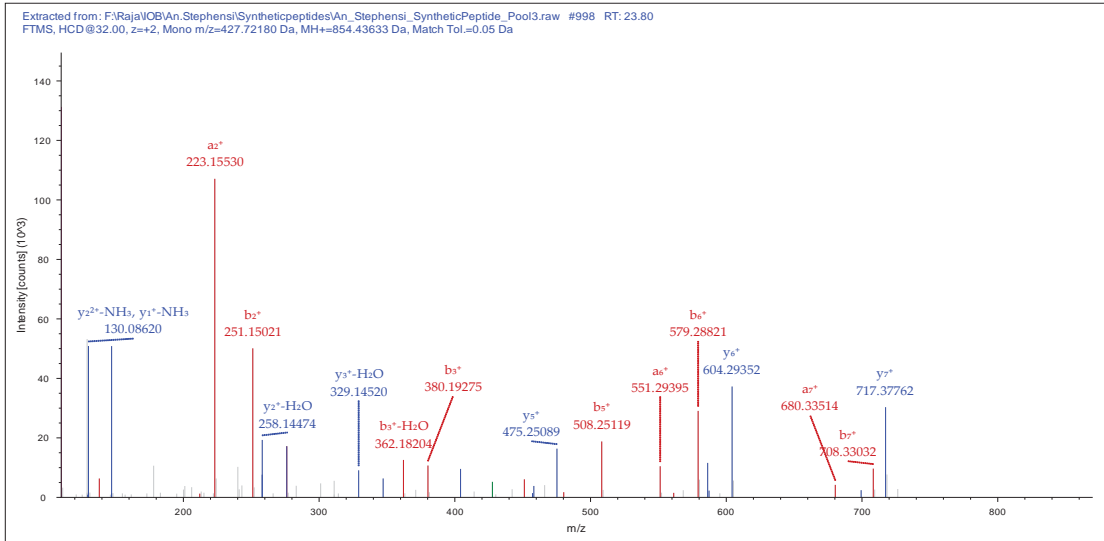

# IEQDSSATSEPTRR

Experiment

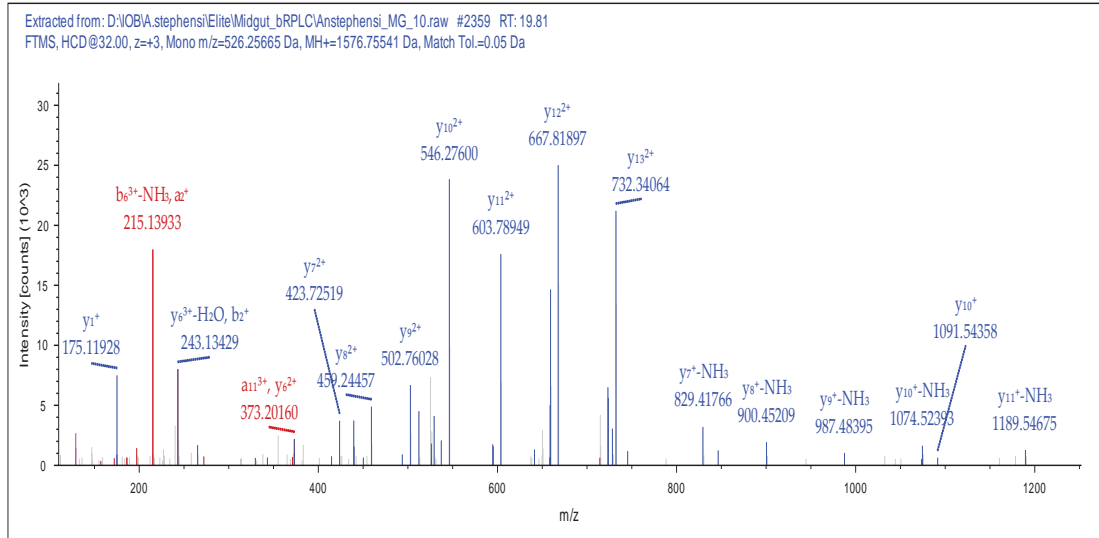

Validated

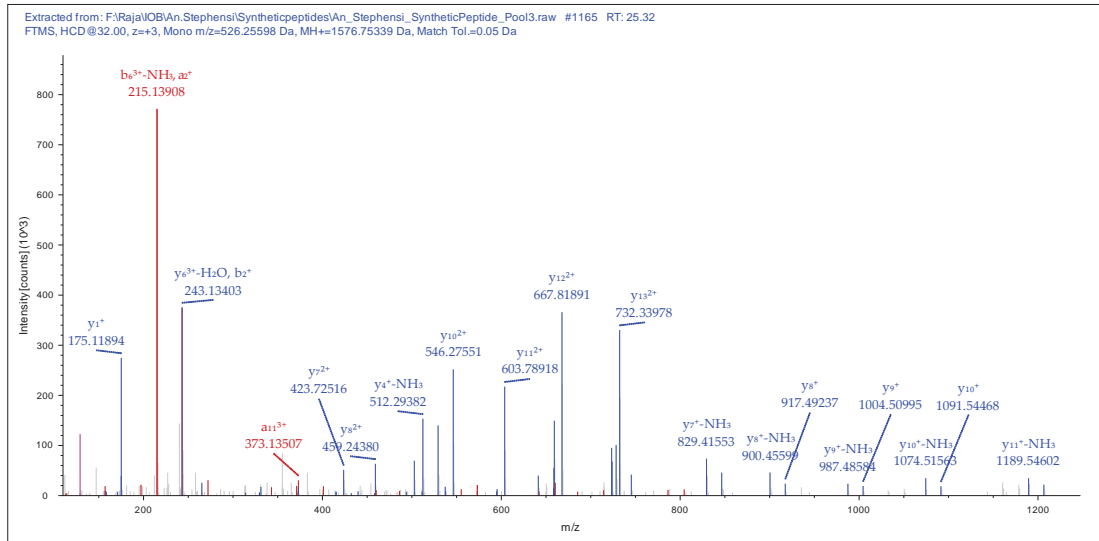

# KAYAADGHEVLDR

Experiment

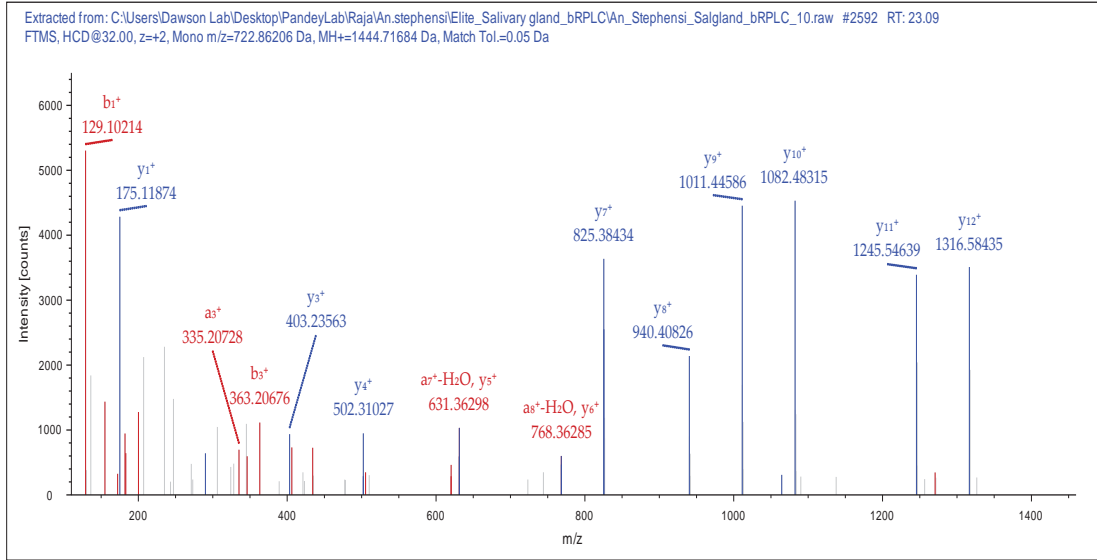

Validated

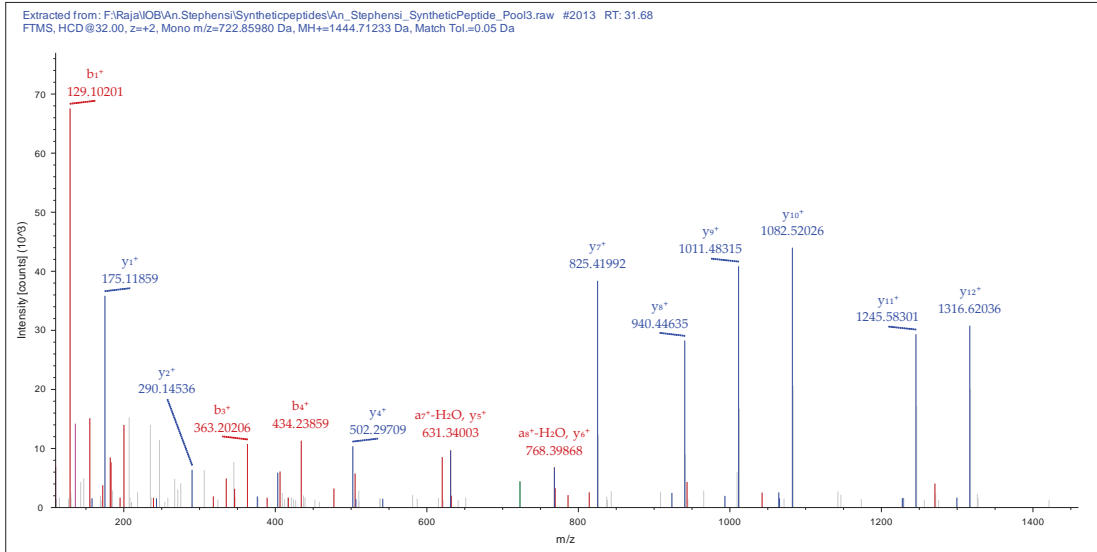

# KIWQATK

## Experiment

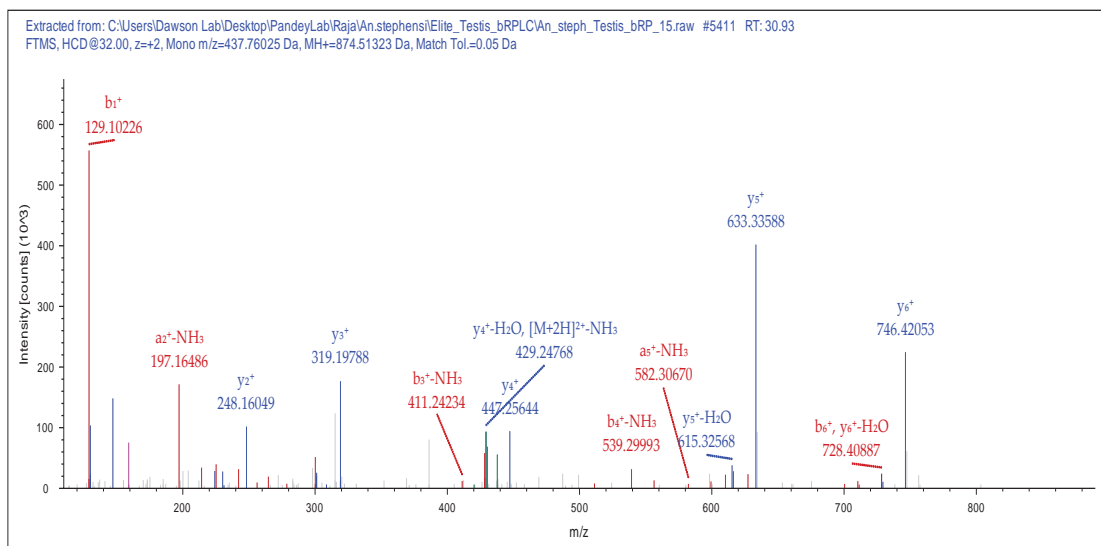

## Validated

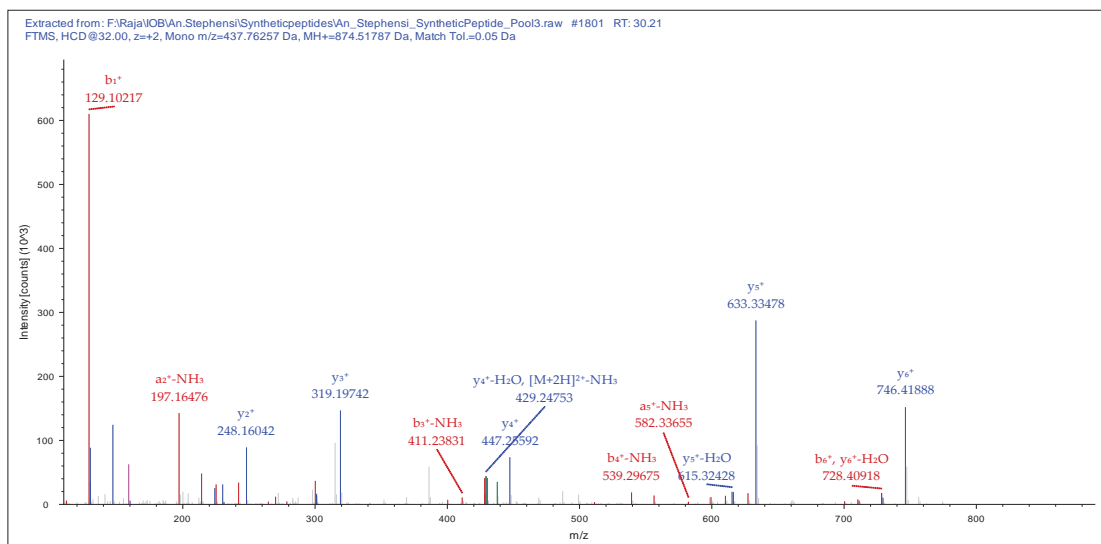



# LDQTIQSIASK

## Experiment

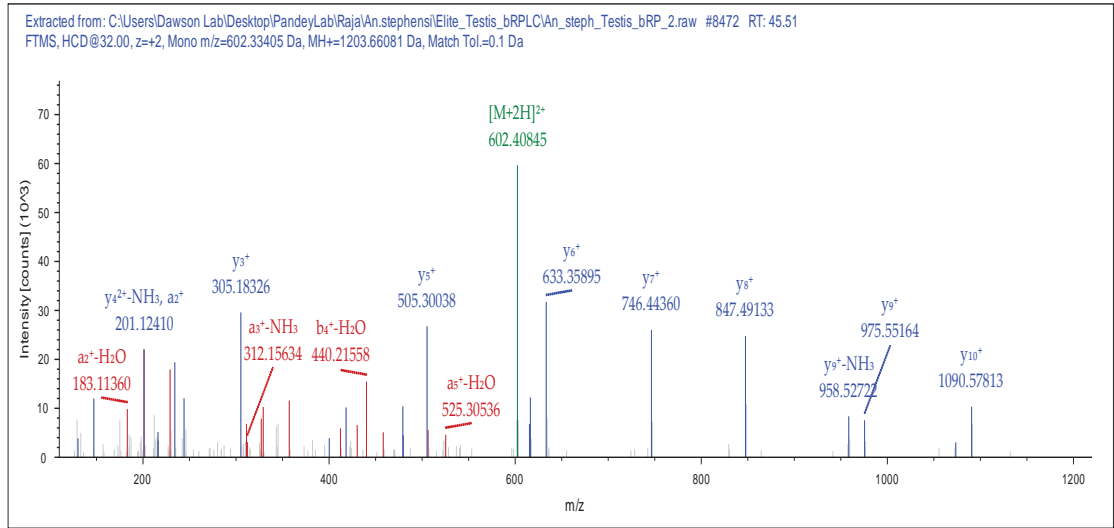

## Validated

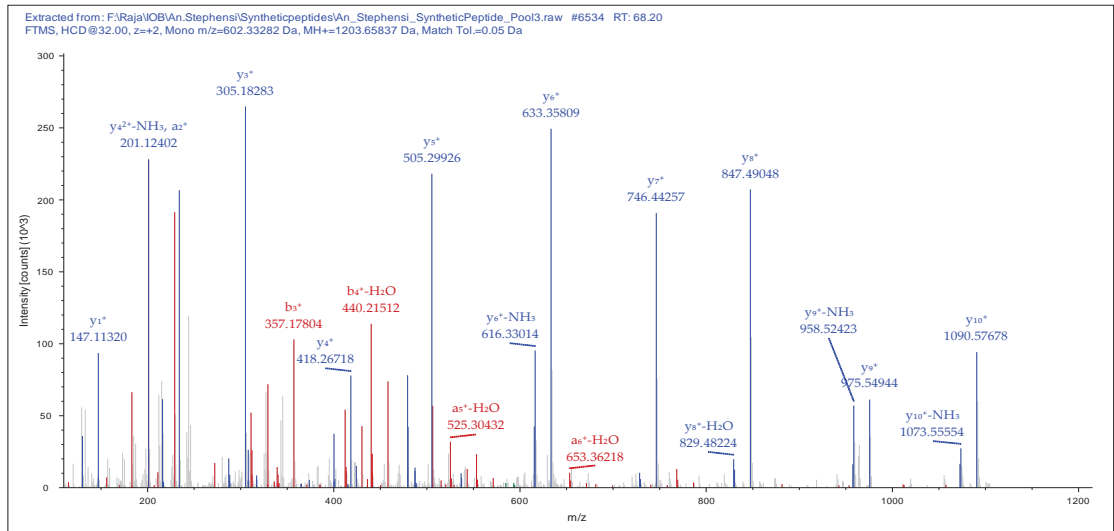

# LLEAAGVPDLR

Experiment

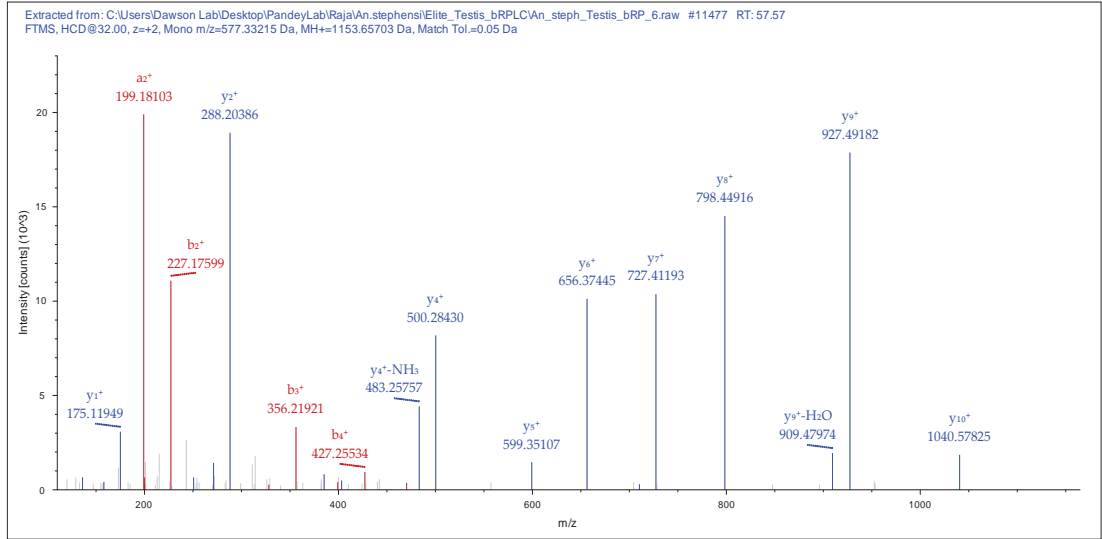

Validated

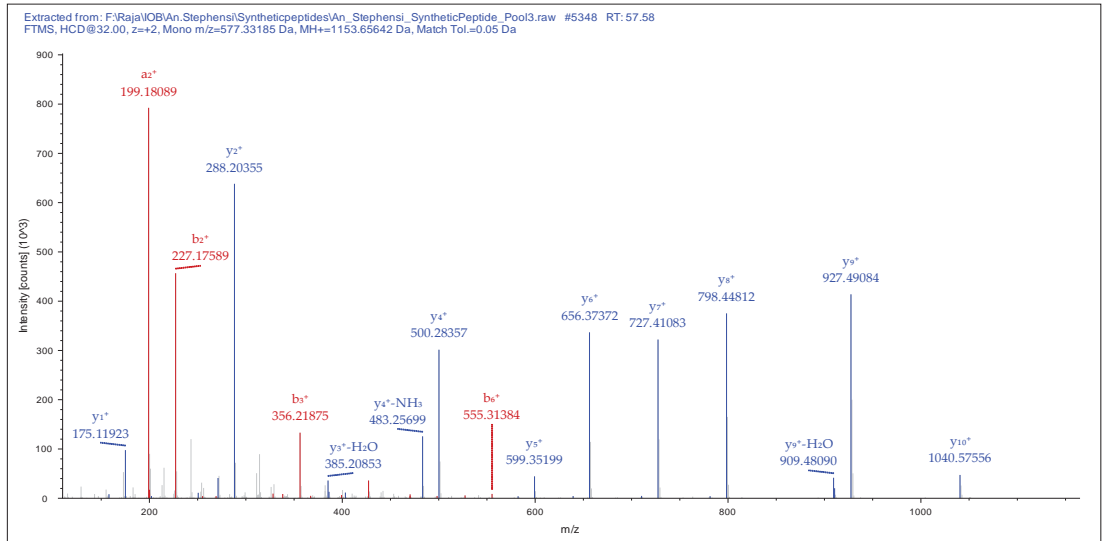

# LLTPAEQEEQVSK

Experiment

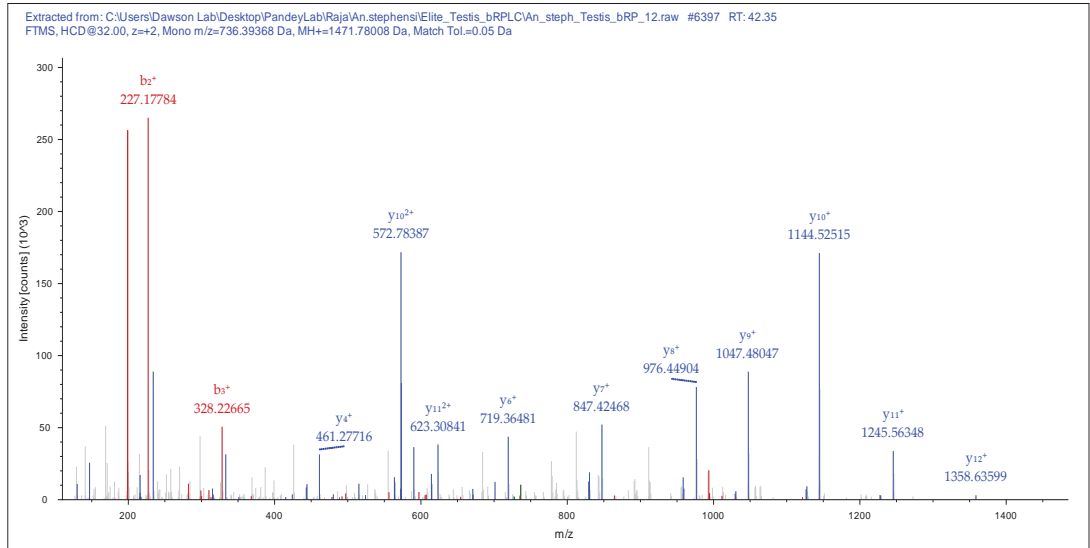

Validated

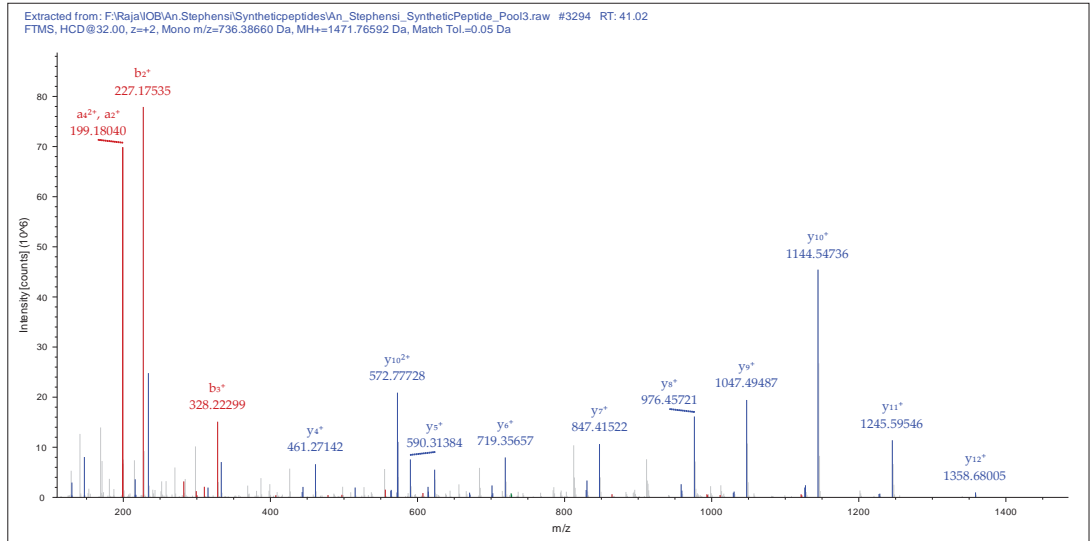

# LQVEHTFEQQTGAK

Experiment

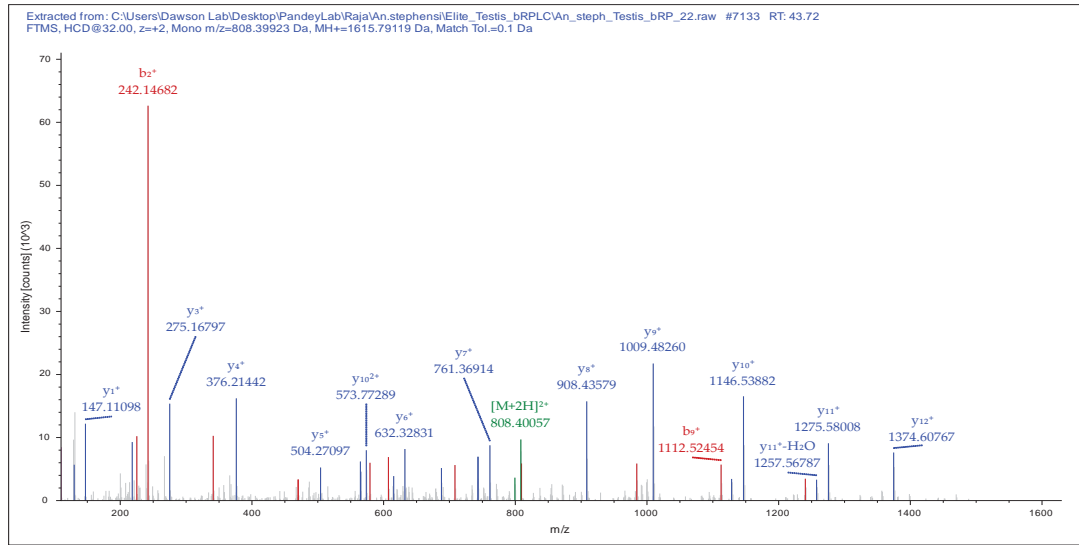

Validated

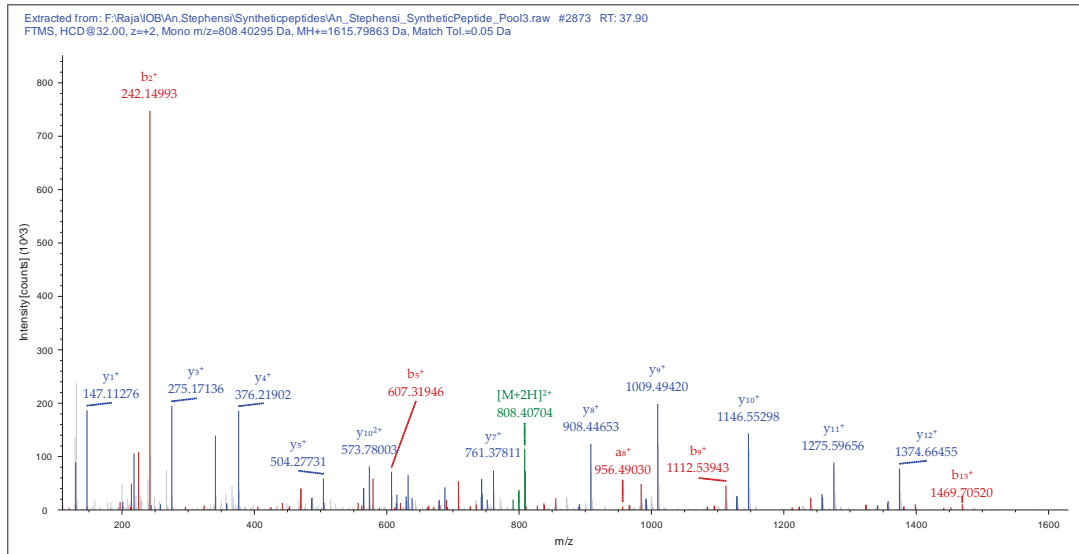

# LTLNVGNGQR

Experiment

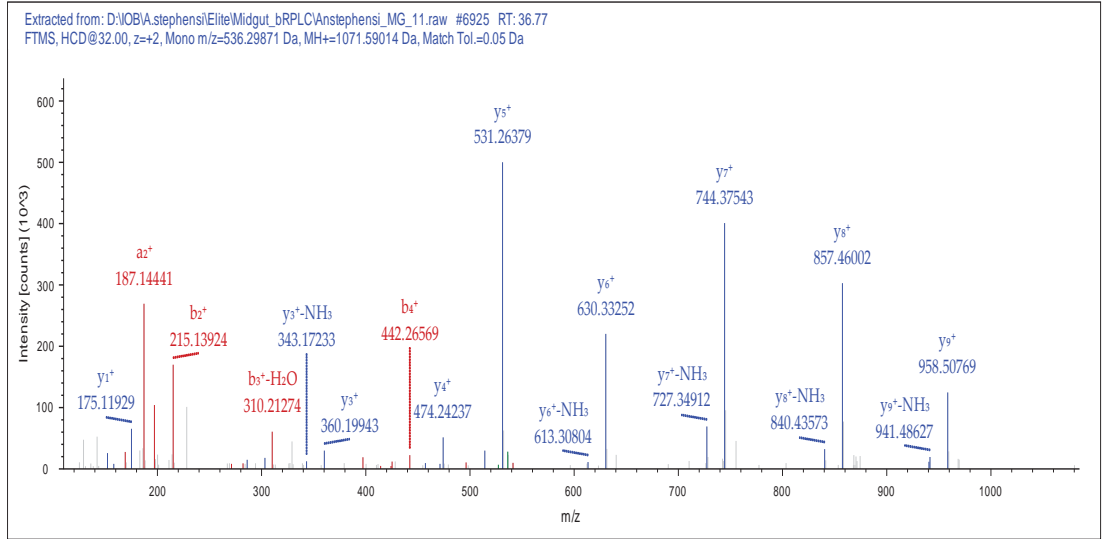

Validated

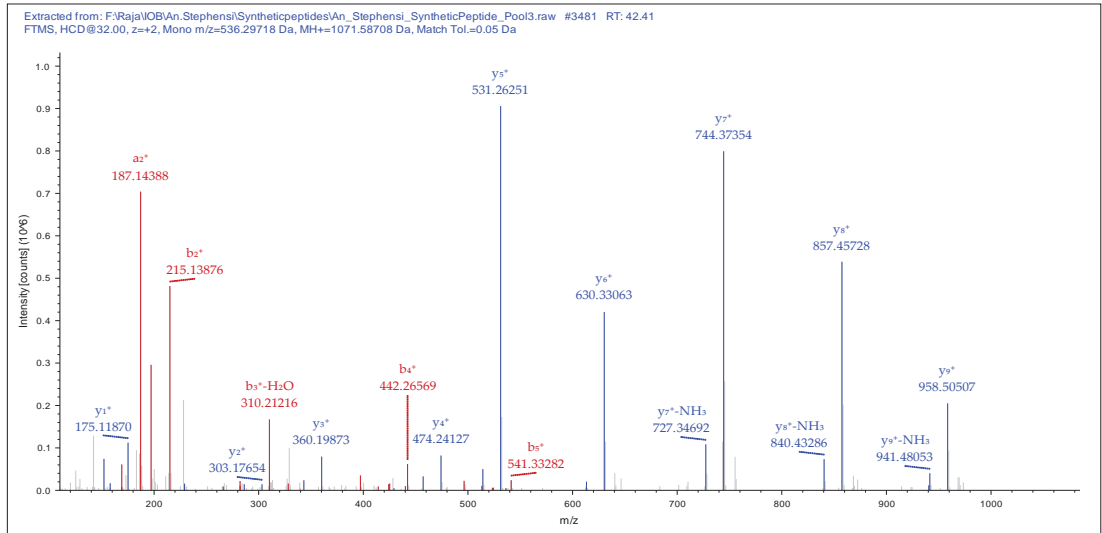

# NESFAALVTESVK

Experiment

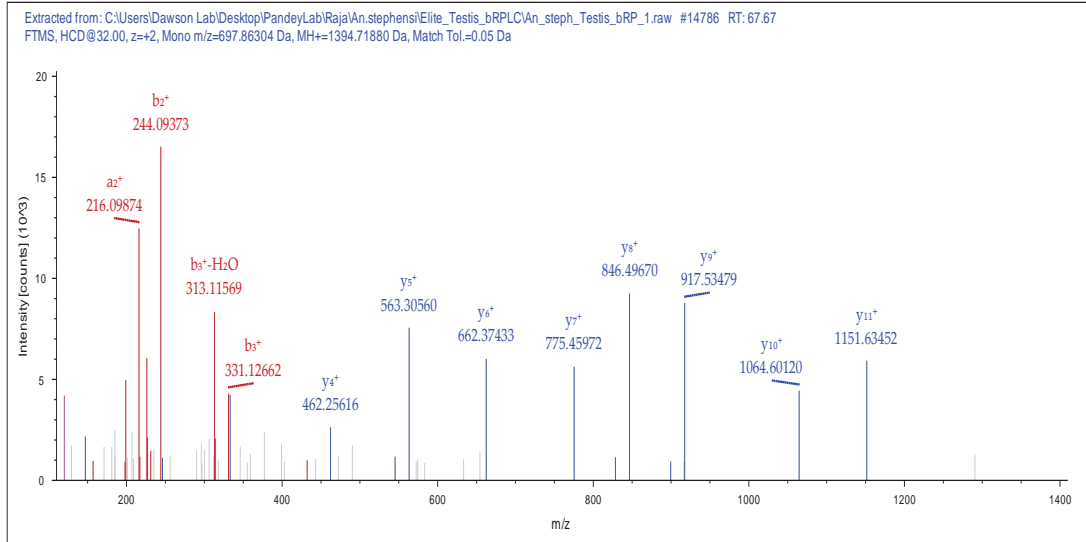

Validated

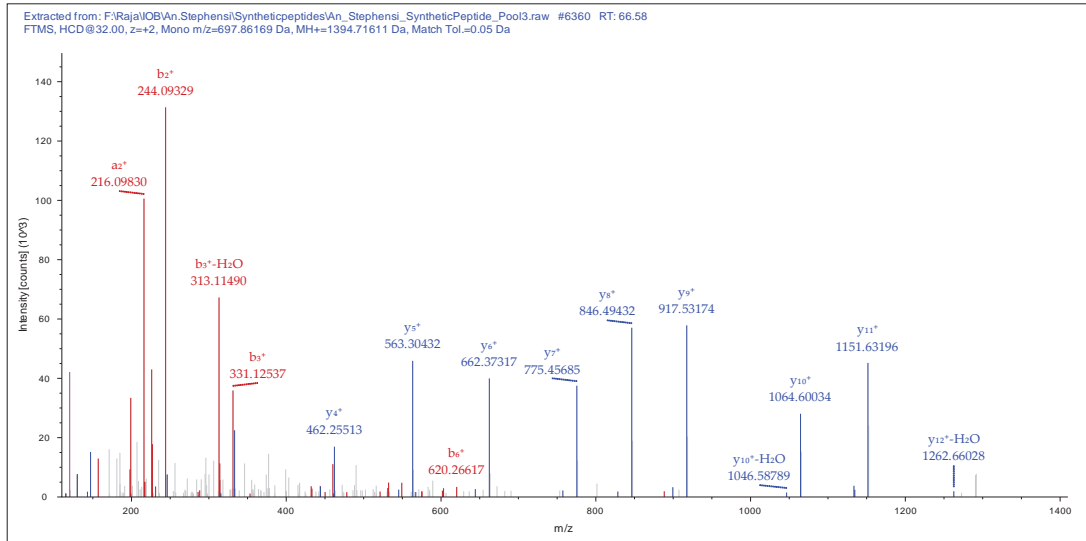

# NFGSQSGANEK

Experiment

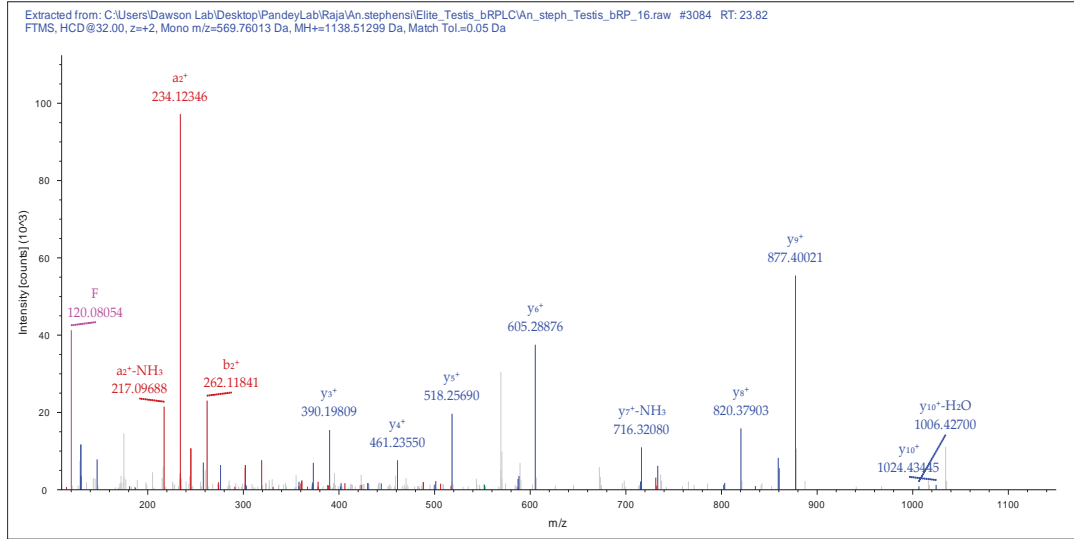

Validated

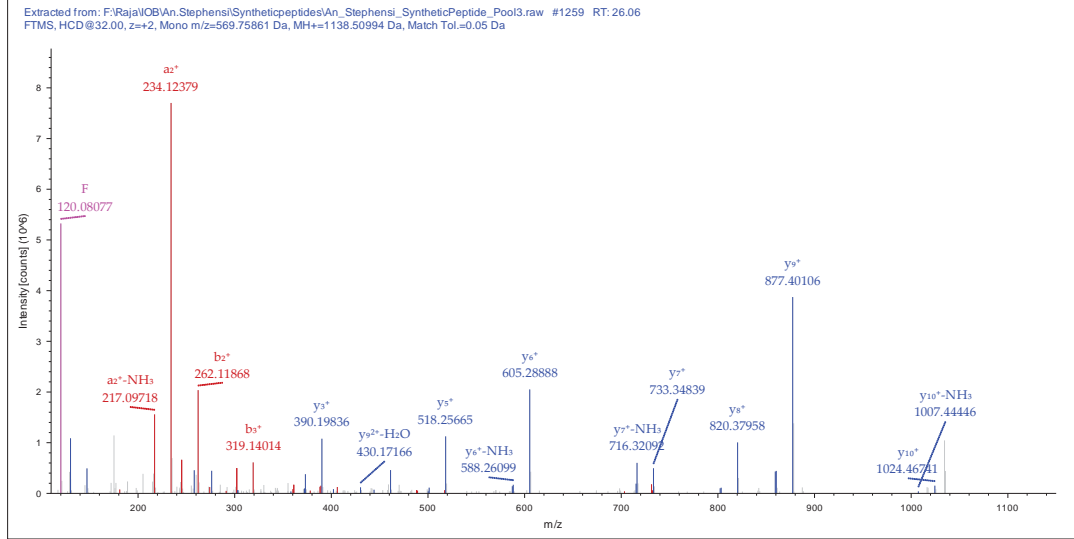

# QANGTGPAASK

Experiment

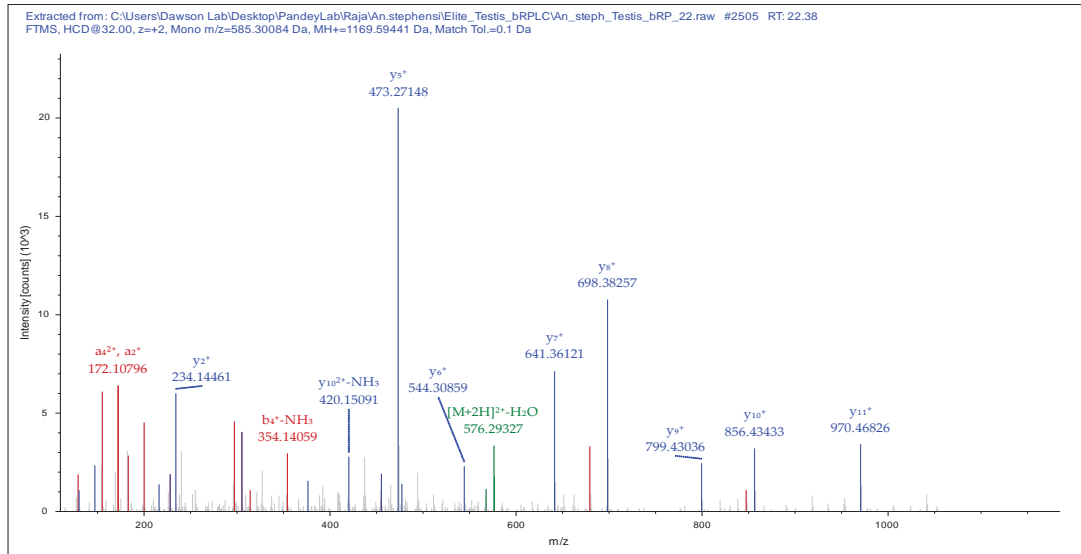

Validated

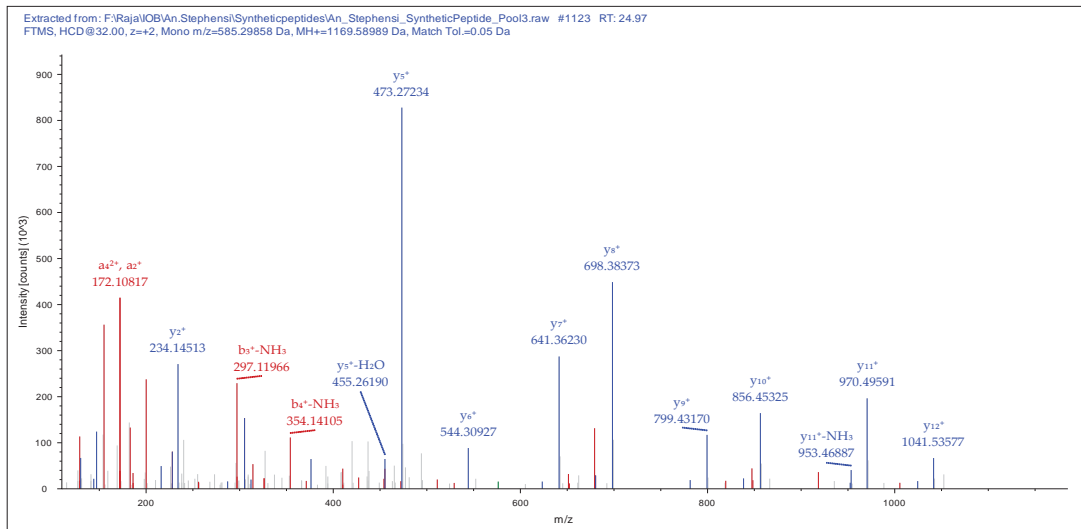



# SDDTSSLDTLSTK

Experiment

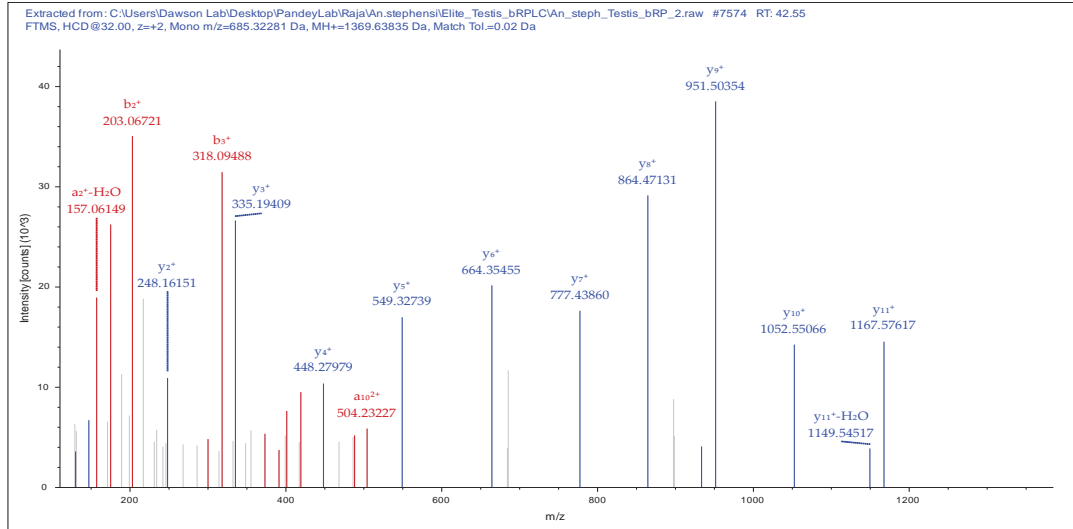

Validated

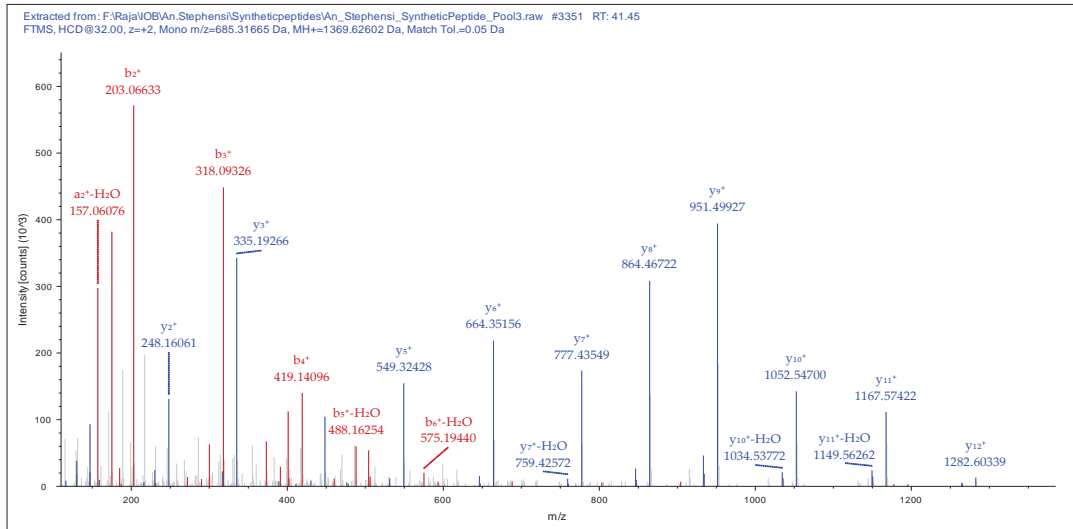

# SNNQDSIGR

Experiment

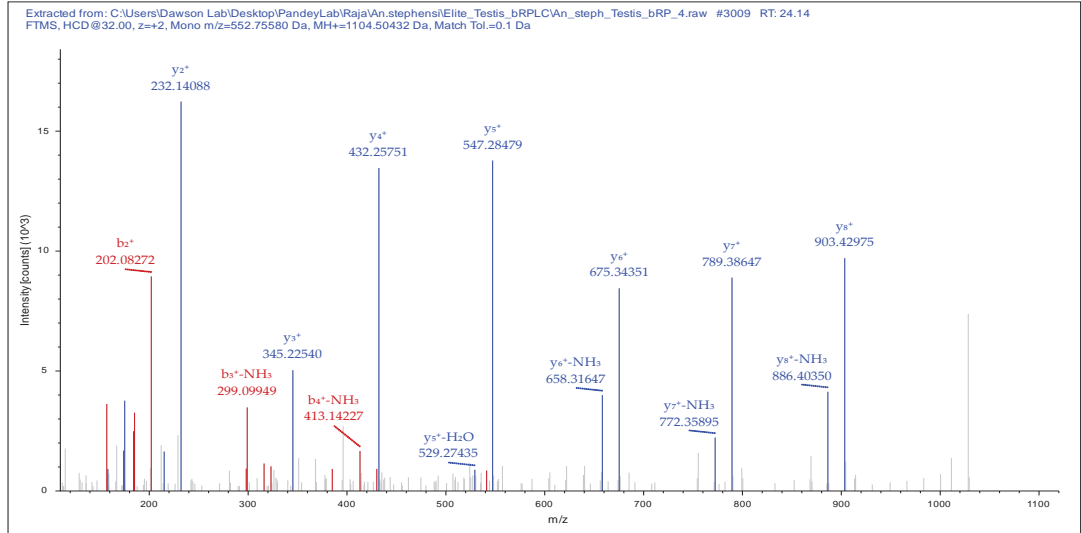

Validated

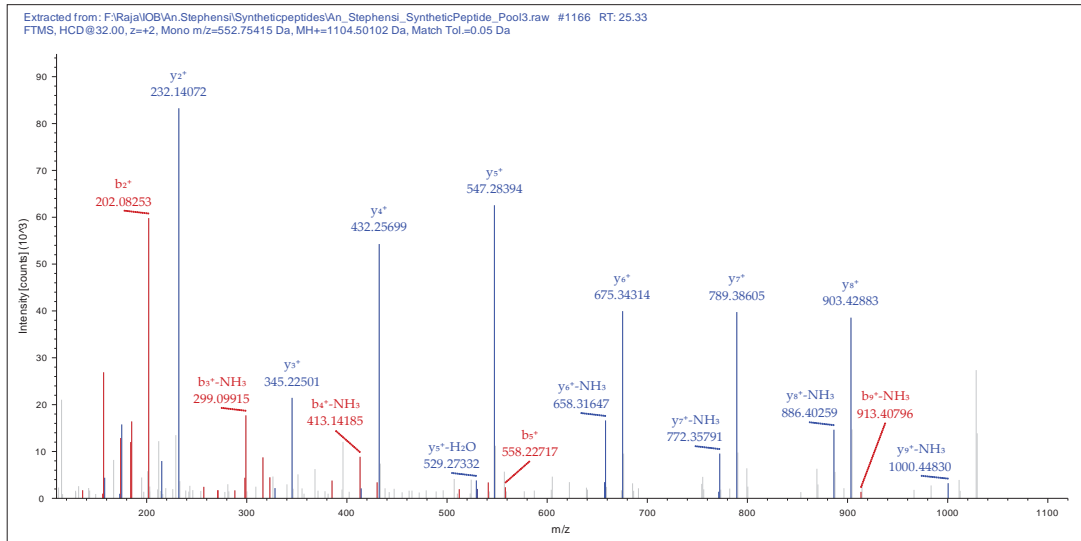

# SSILQVLLR

Experiment

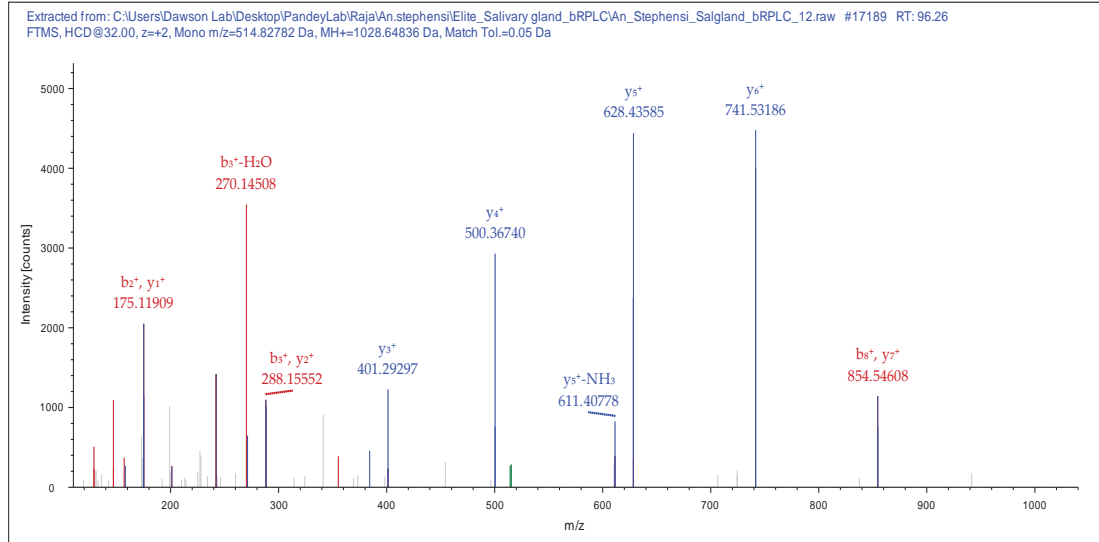

Validated

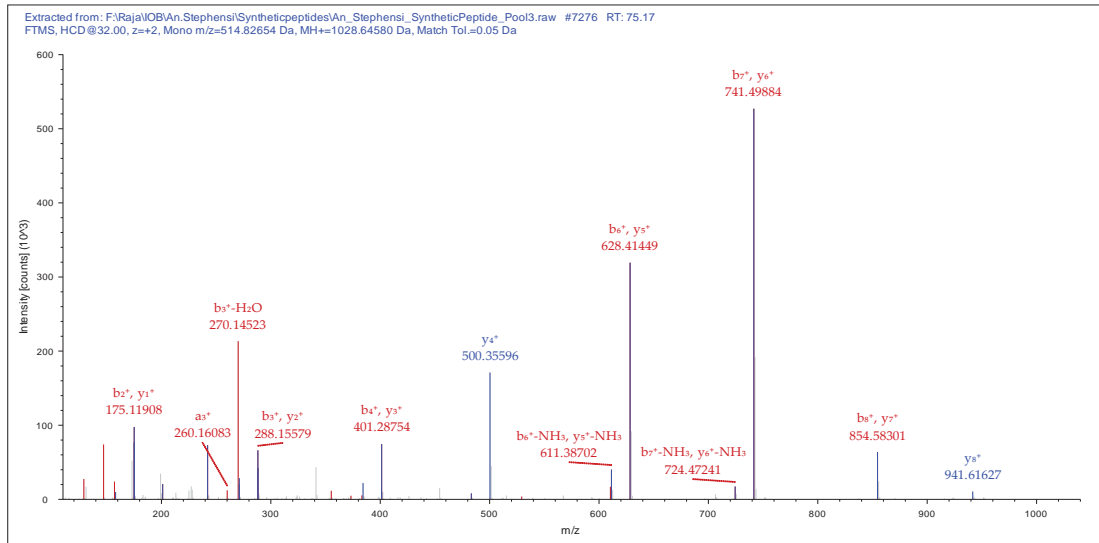

# SVVQYDSAGASNNR

Experiment

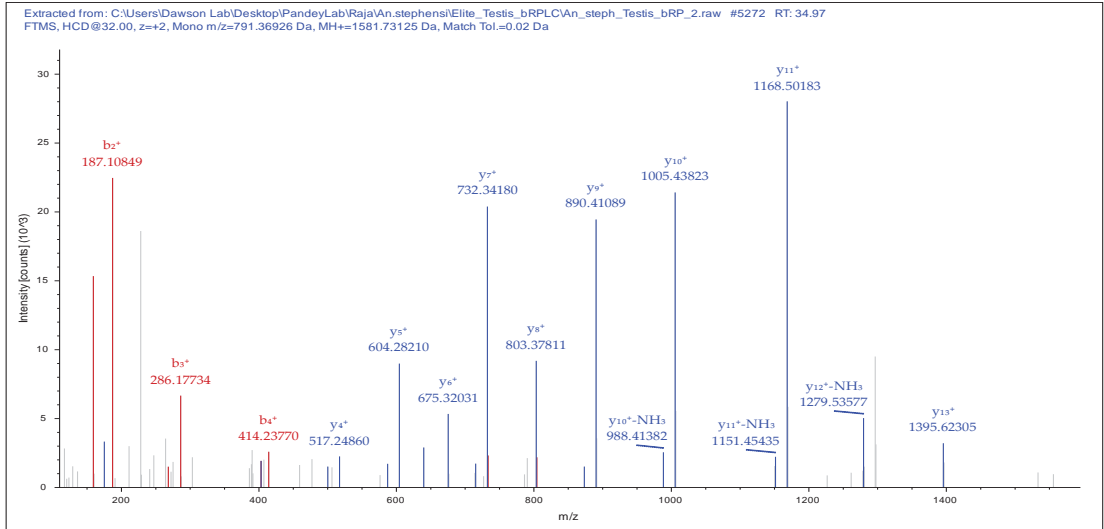

Validated

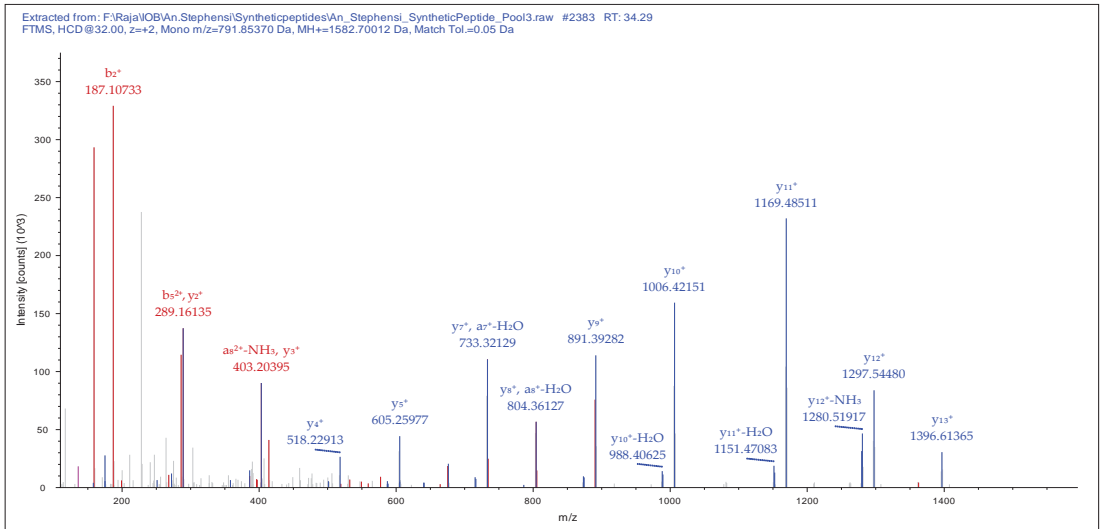

# TEELNQETR

Experiment

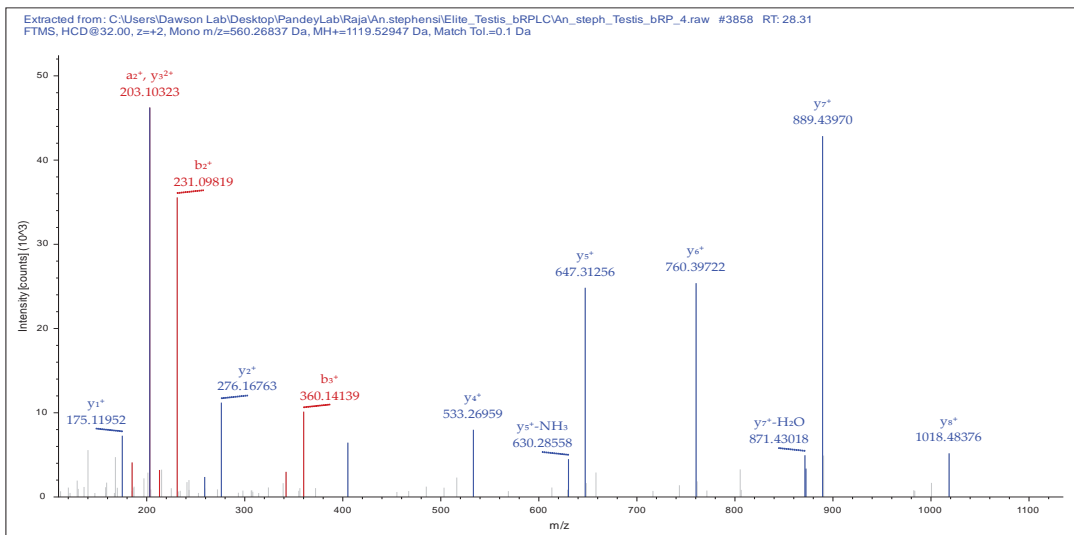

Validated

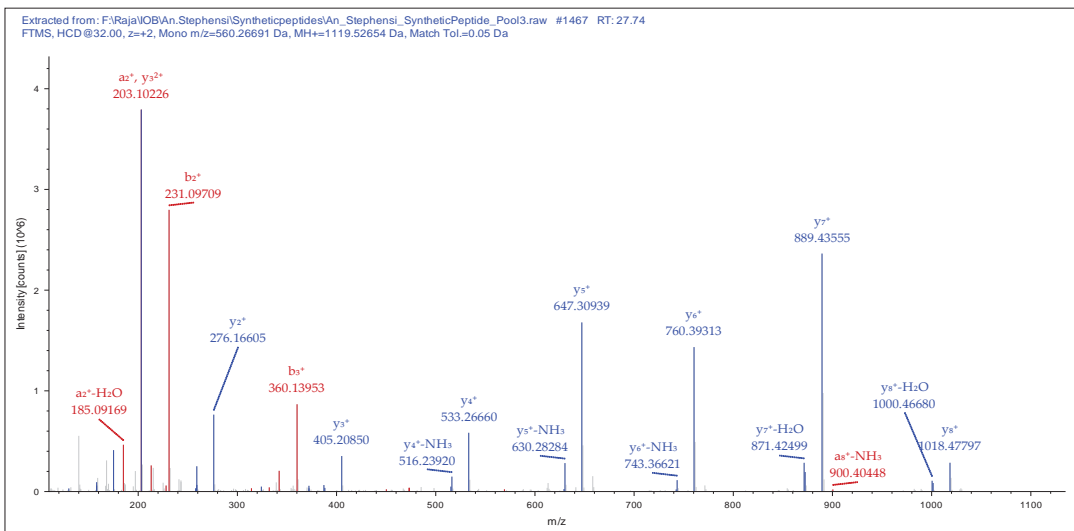

# TGDVLGFGK

Experiment

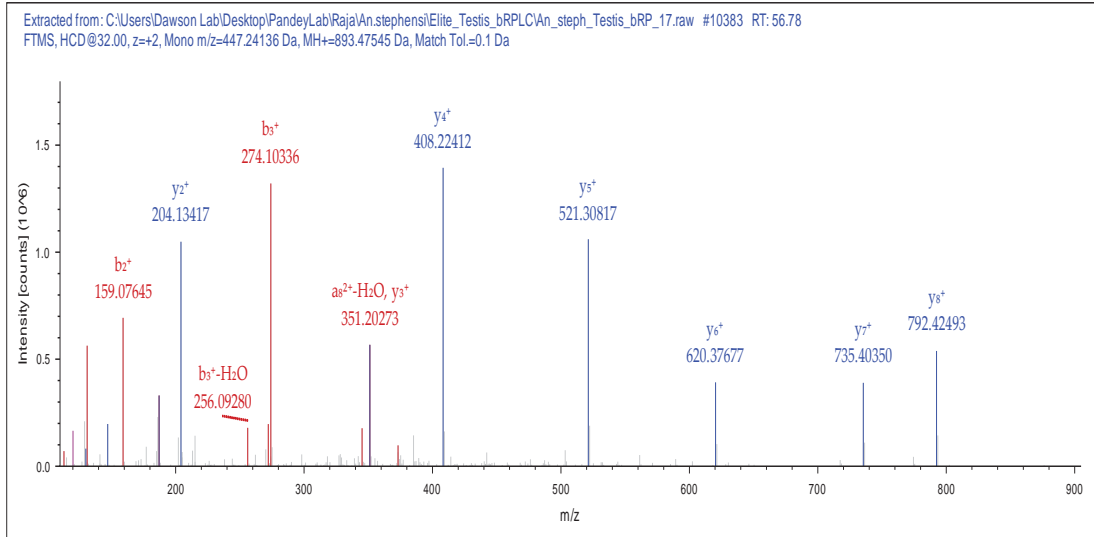

Validated

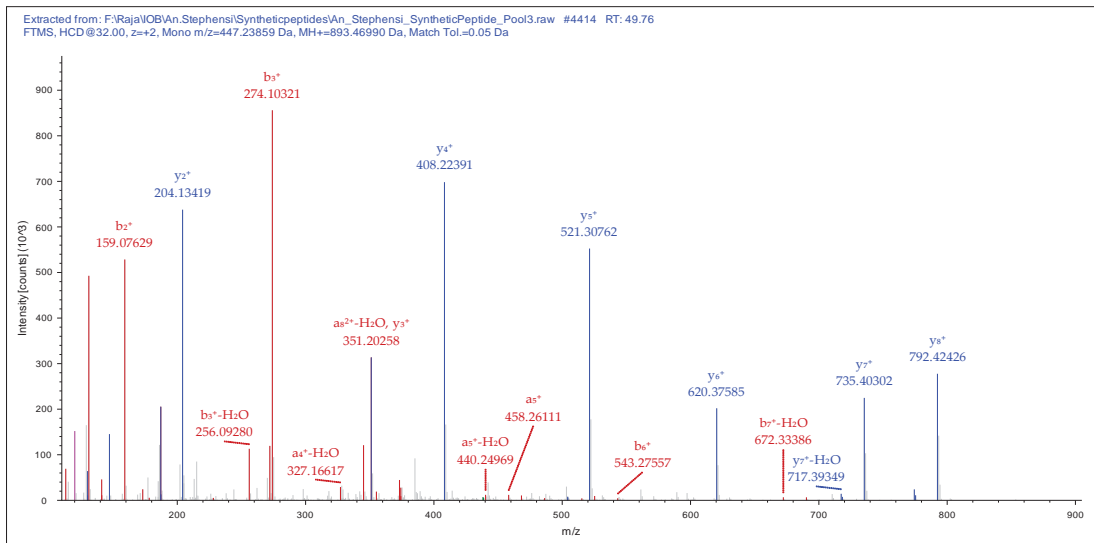

# TIATIDVHAR

Experiment

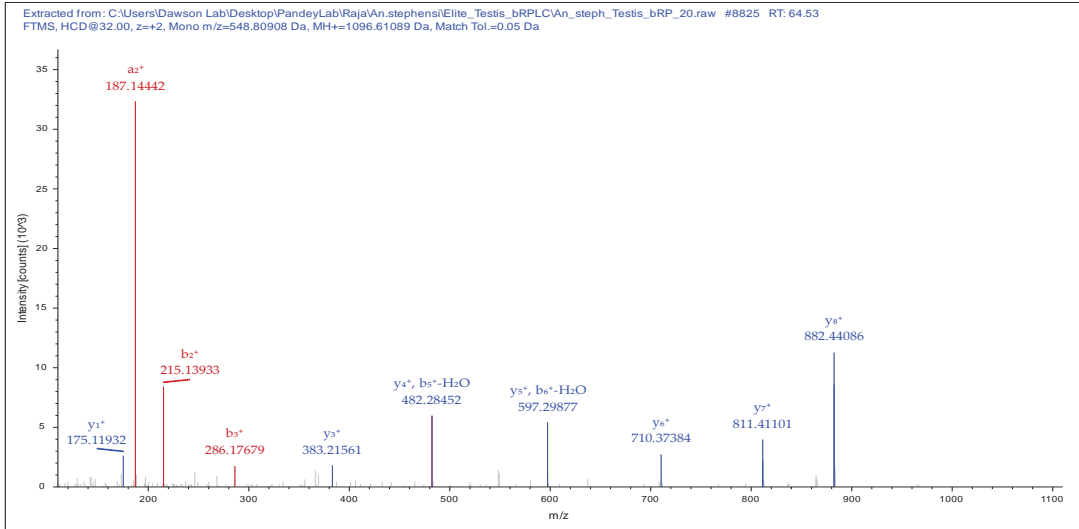

Validated

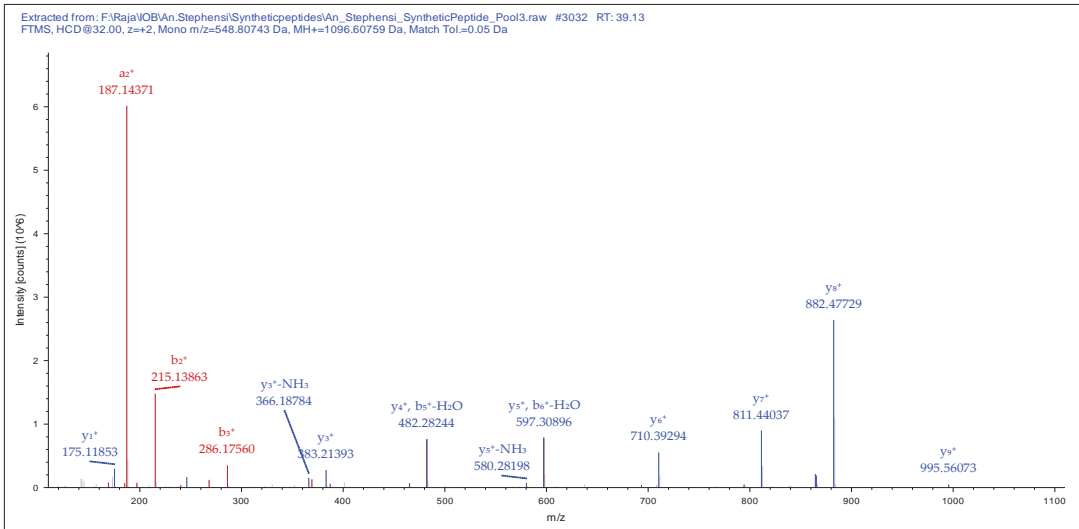

# TLELEFTYAPR

Experiment

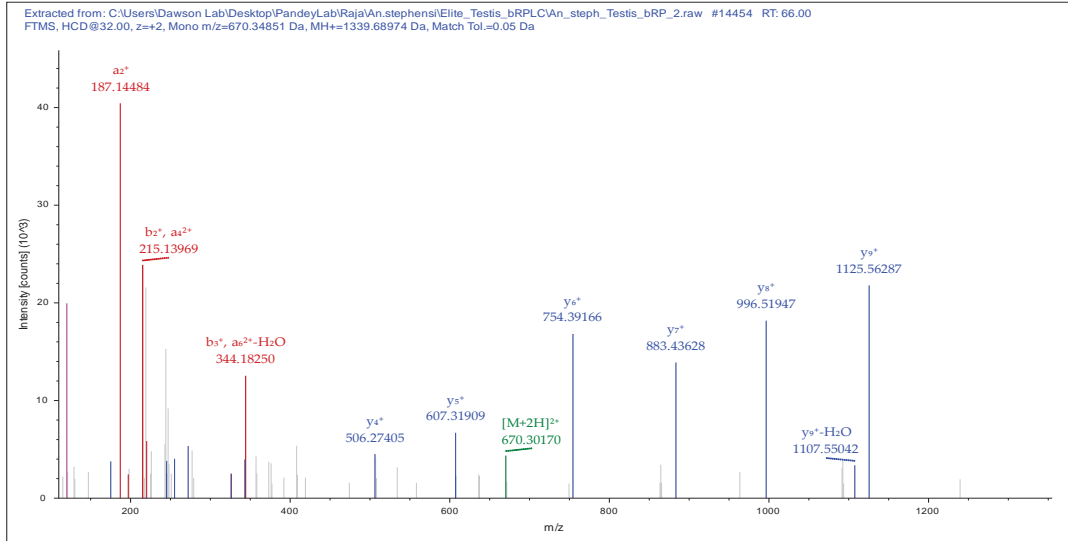

Validated

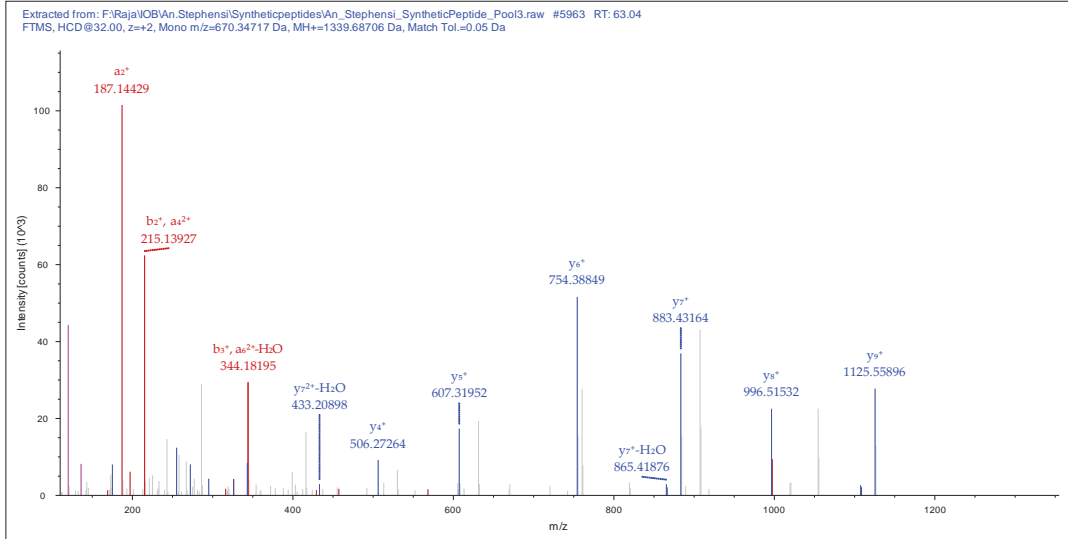



# TLTENGYQVNLK

Experiment

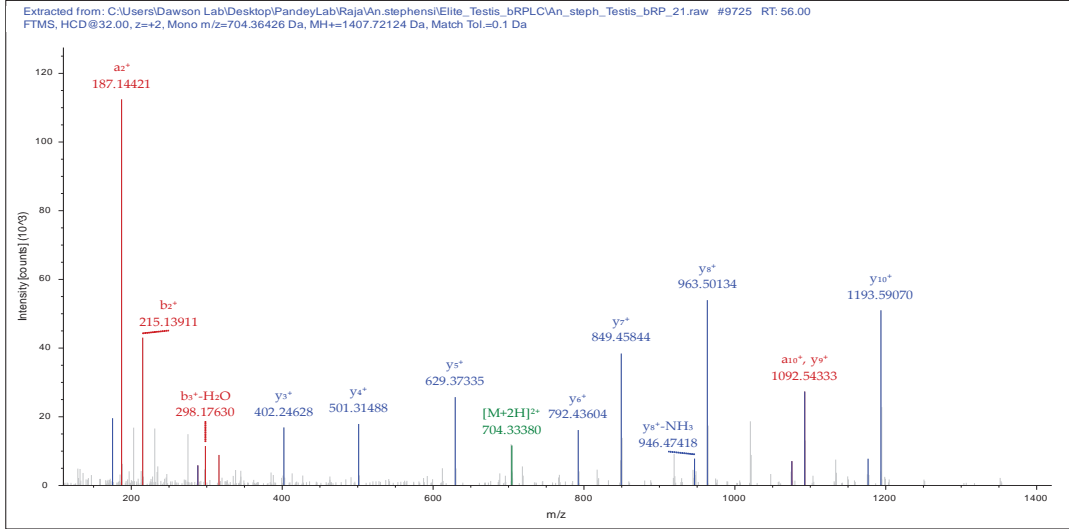

Validated

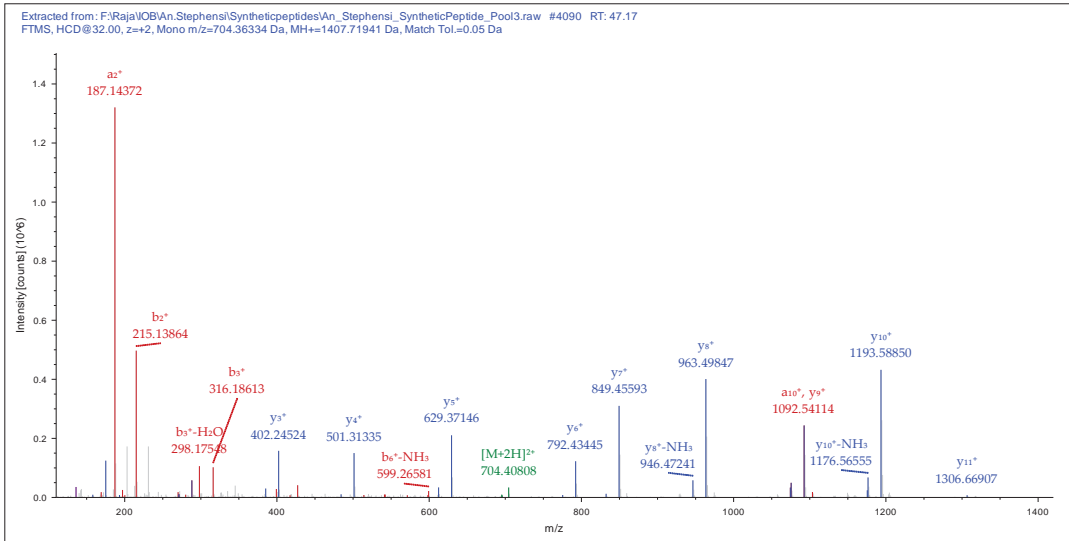

# TVLEQQVTR

Experiment

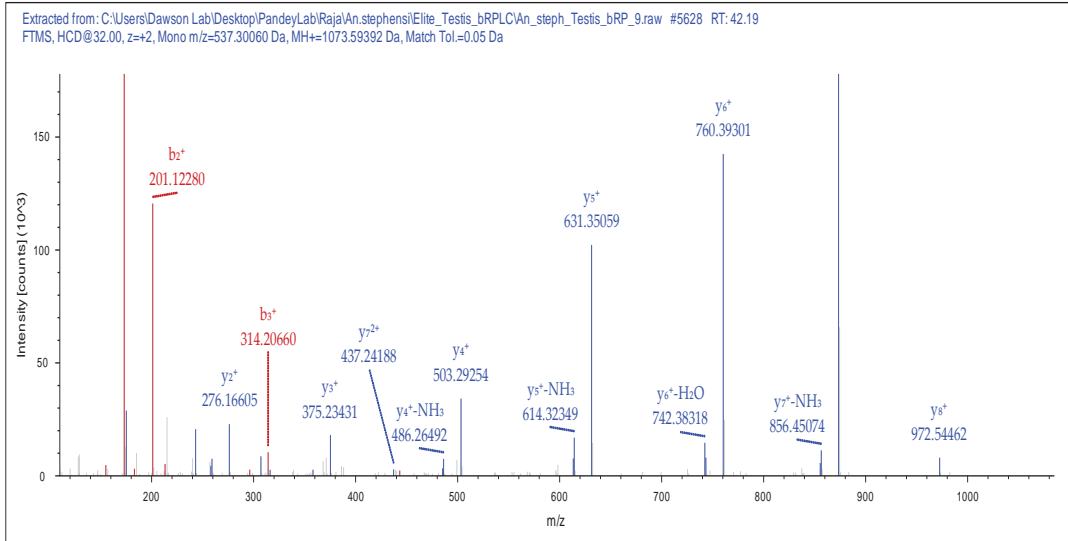

Validated

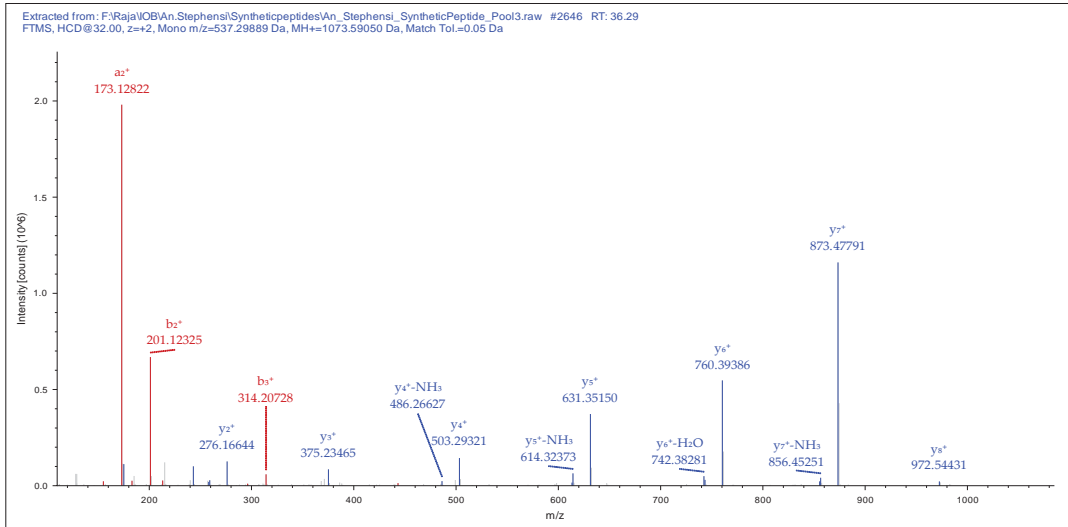

# VPGPLNTHSK

Experiment

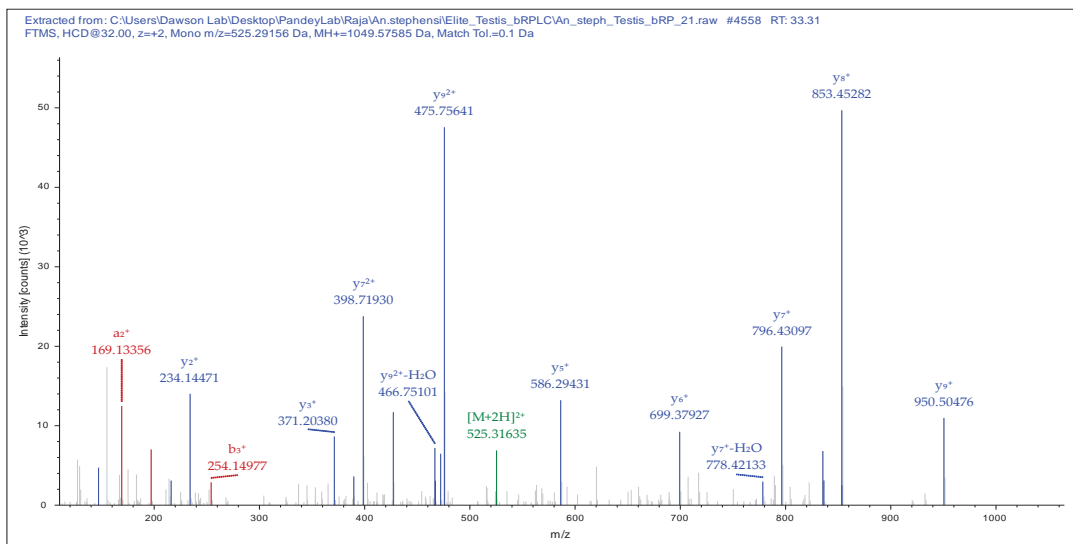

Validated

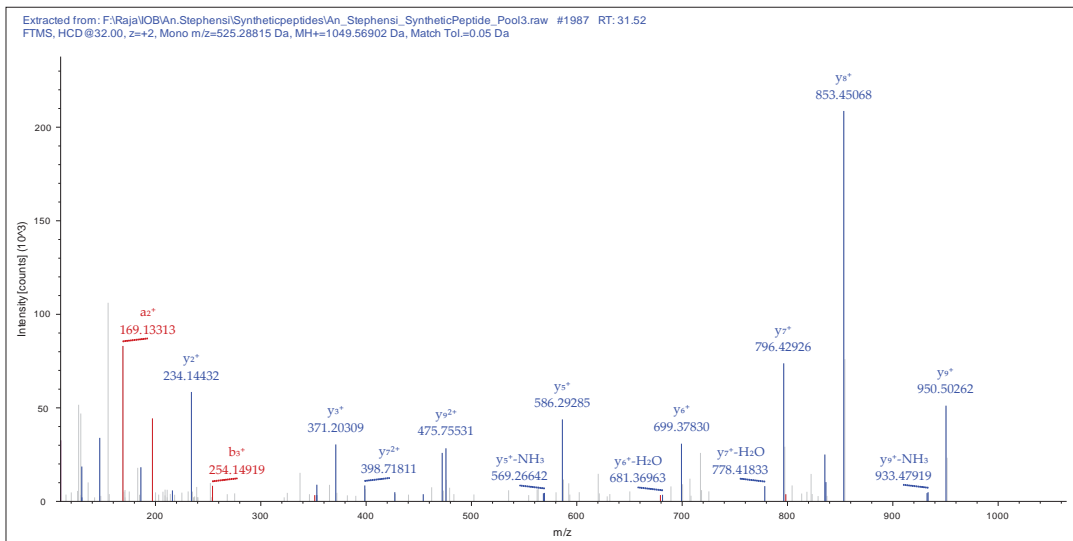

# VTEPPRGFK

Experiment

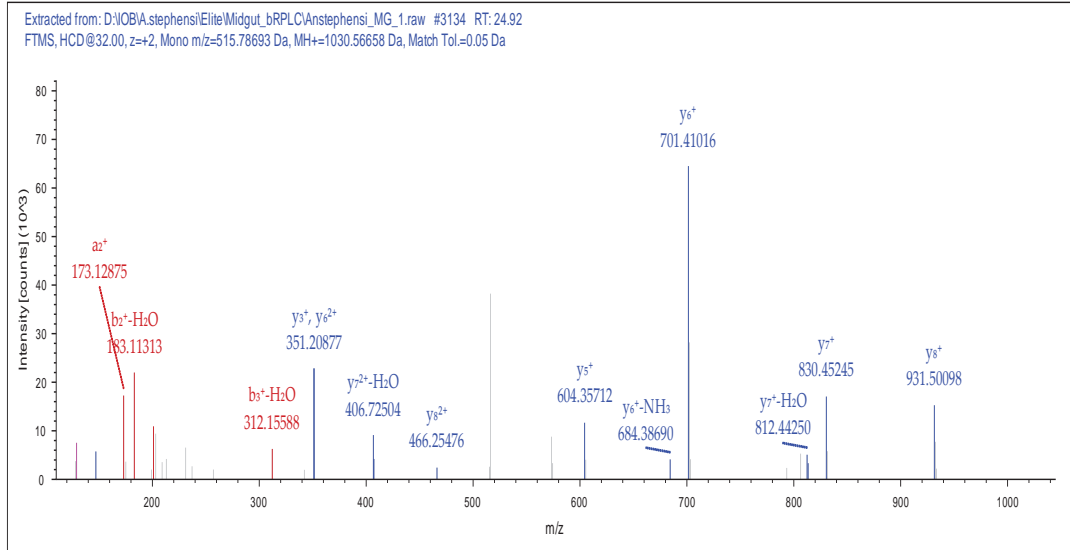

Validated

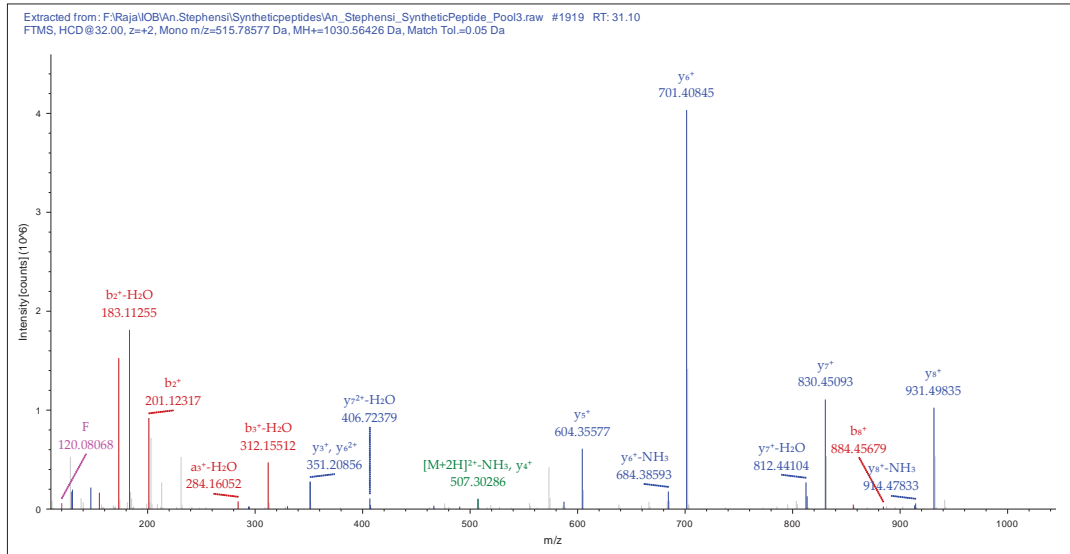

# VTVVDLGPYR

Experiment

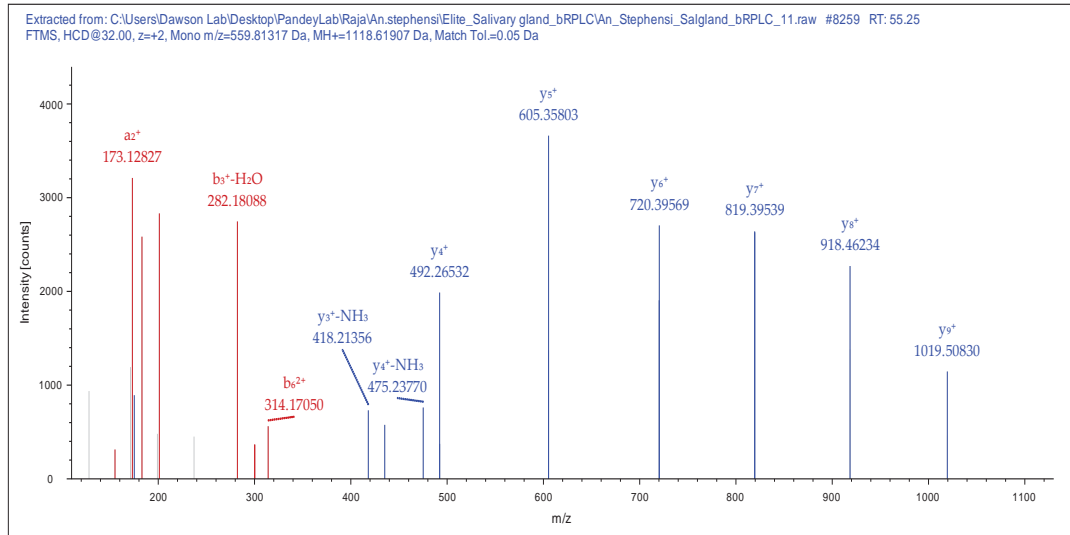

Validated

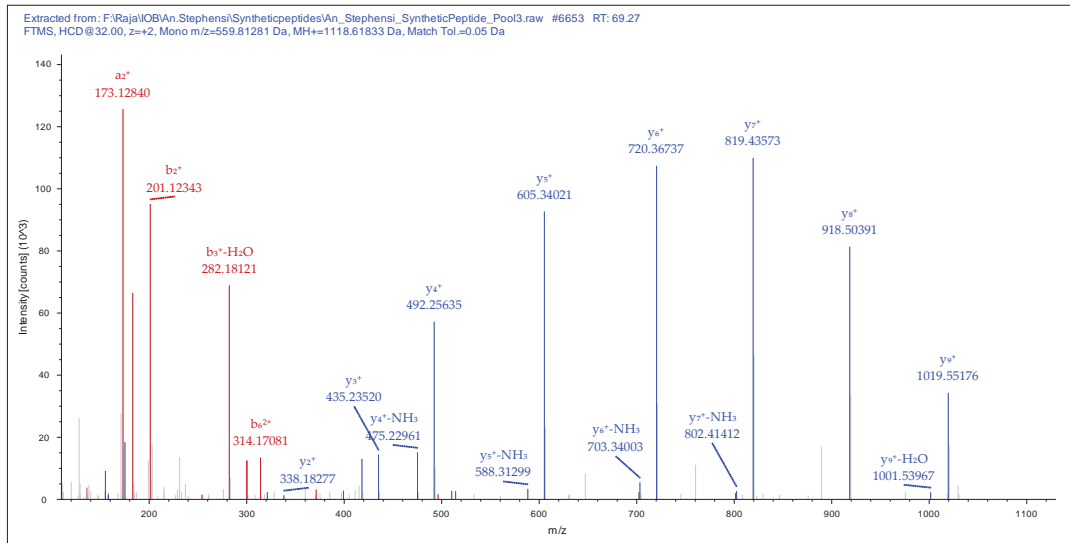

# KANDTEAAVVSER

Experiment

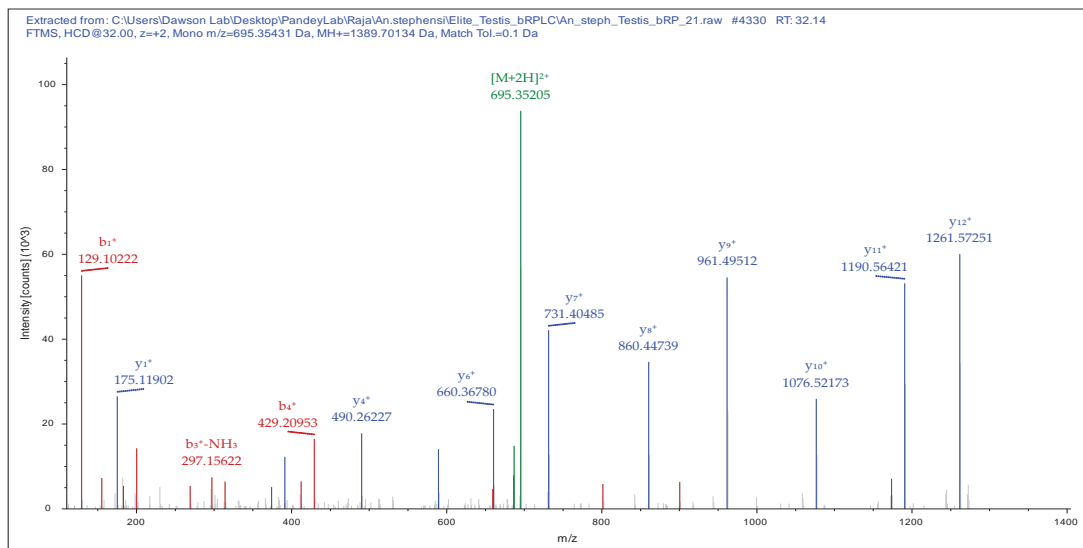

Validated

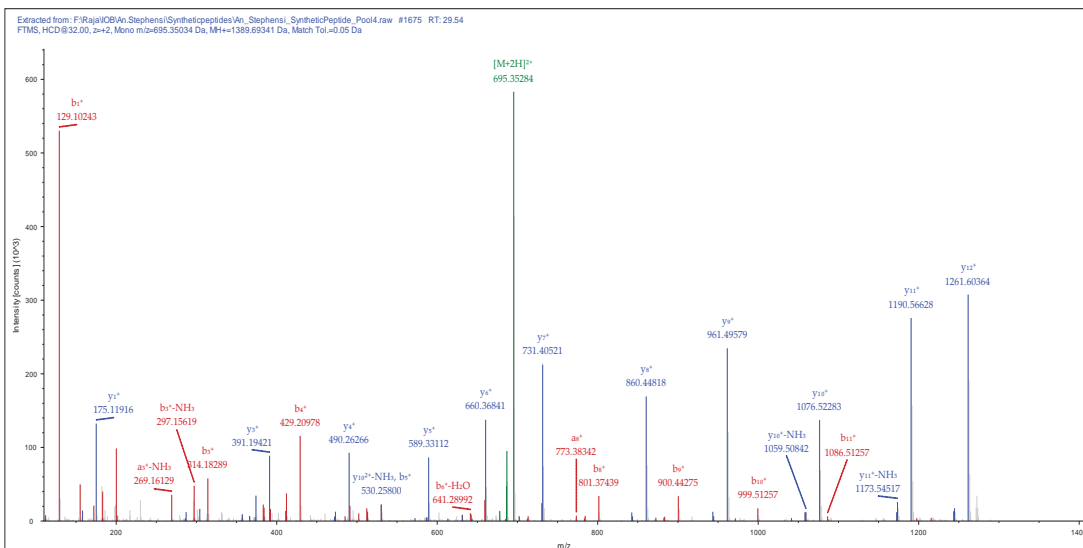

# AKDGAATVAEDVK

Experiment

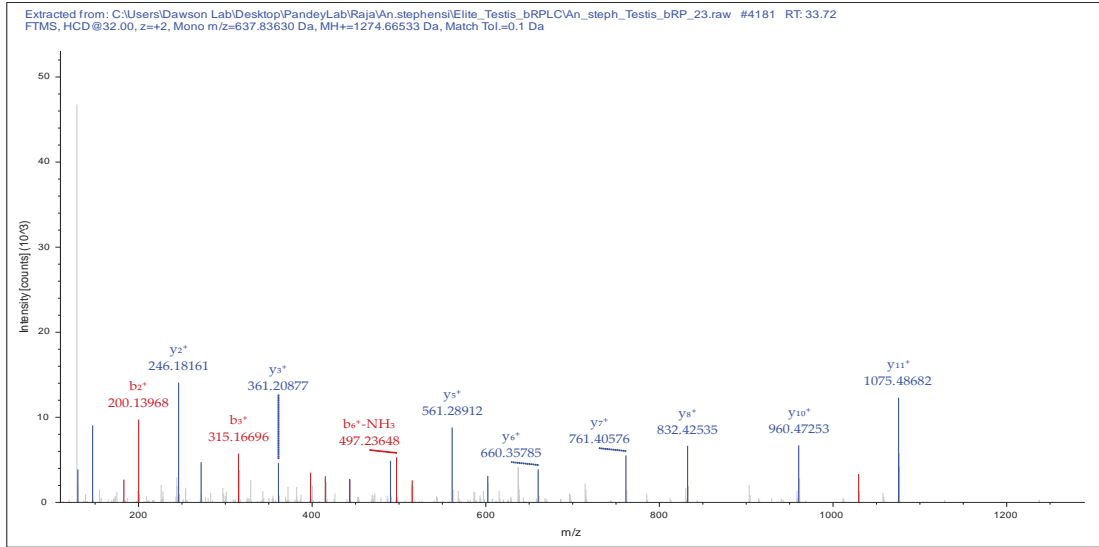

Validated

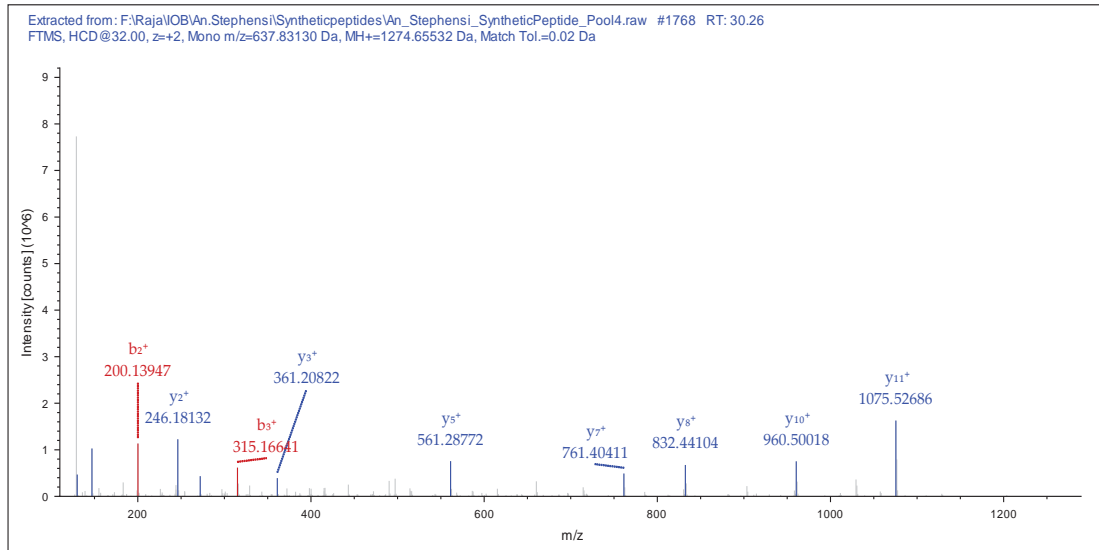

# ALNVSEFGQK

Experiment

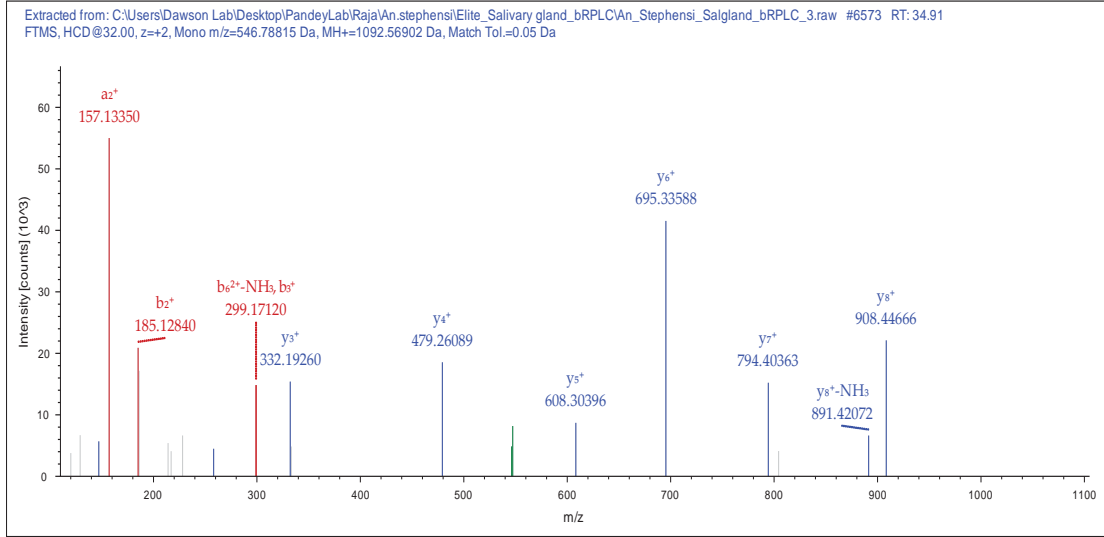

Validated

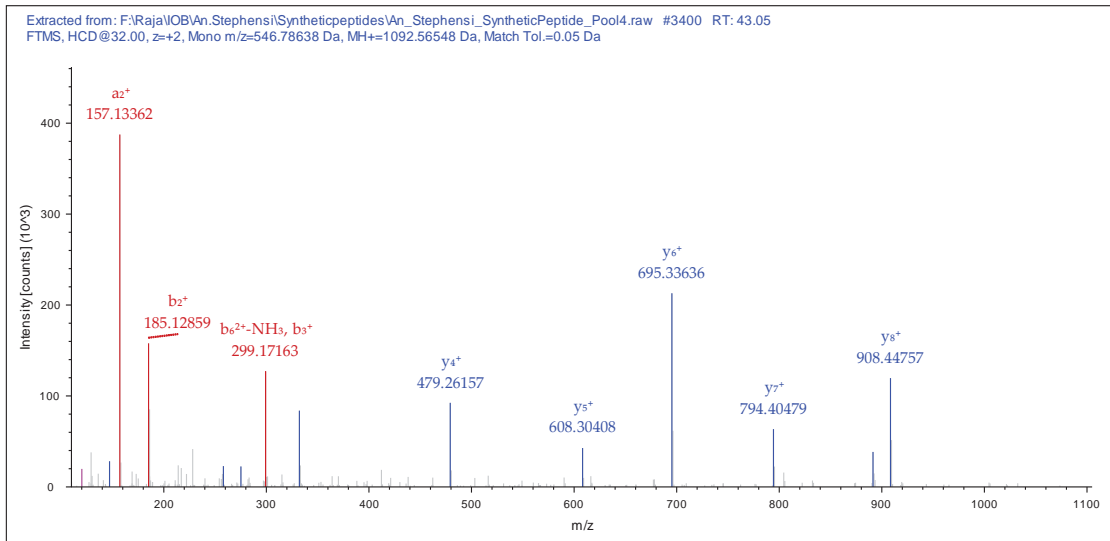



# FLEVLQNDFR

Experiment

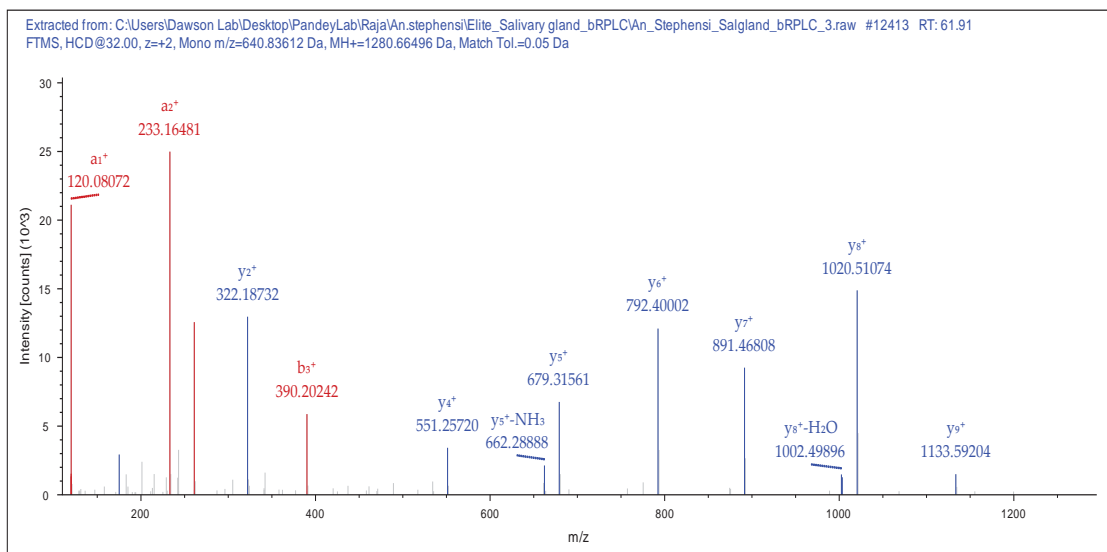

Validated

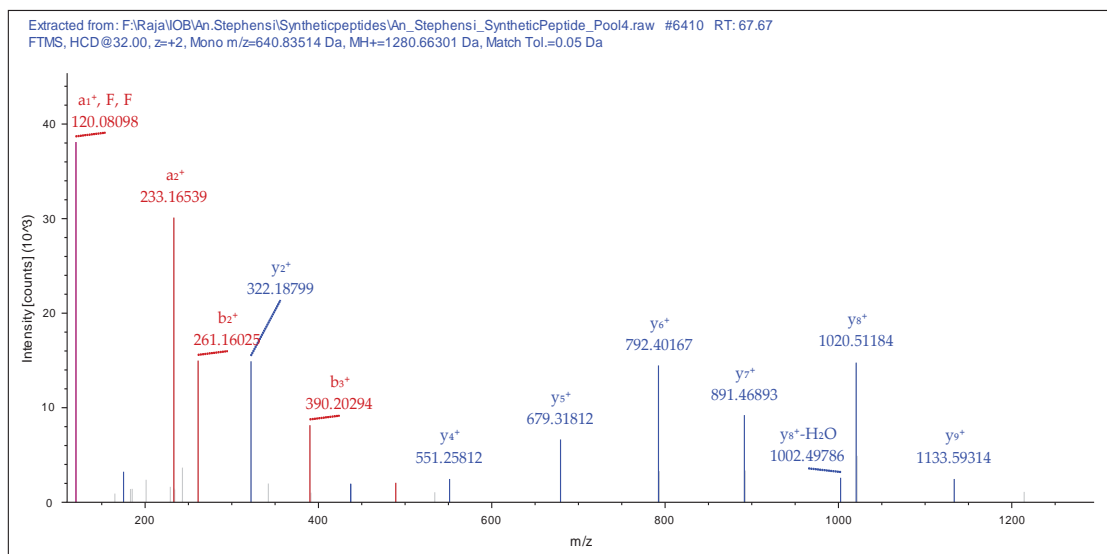

# GTDGSGYPPFR

Experiment

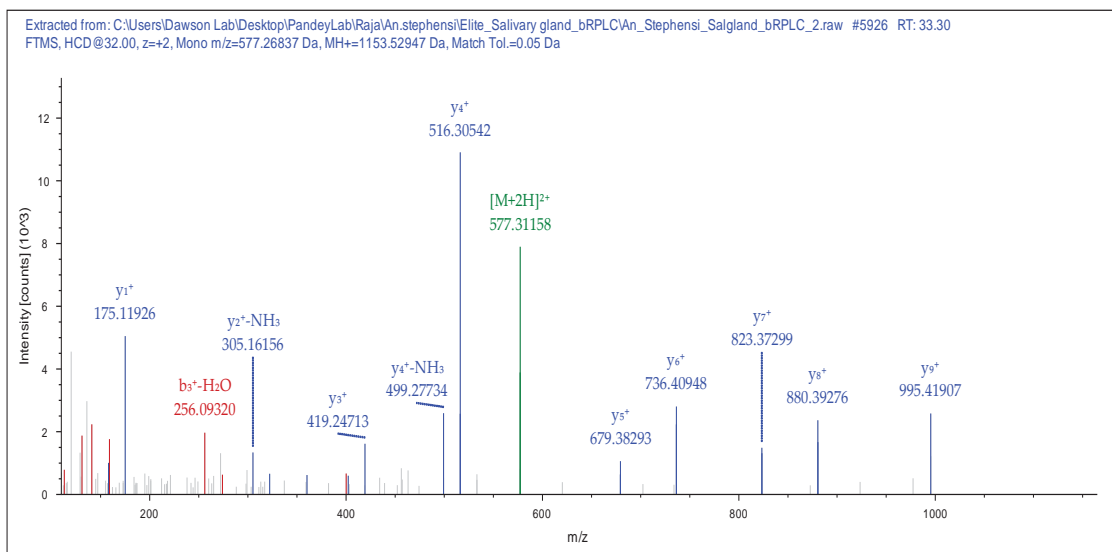

Validated

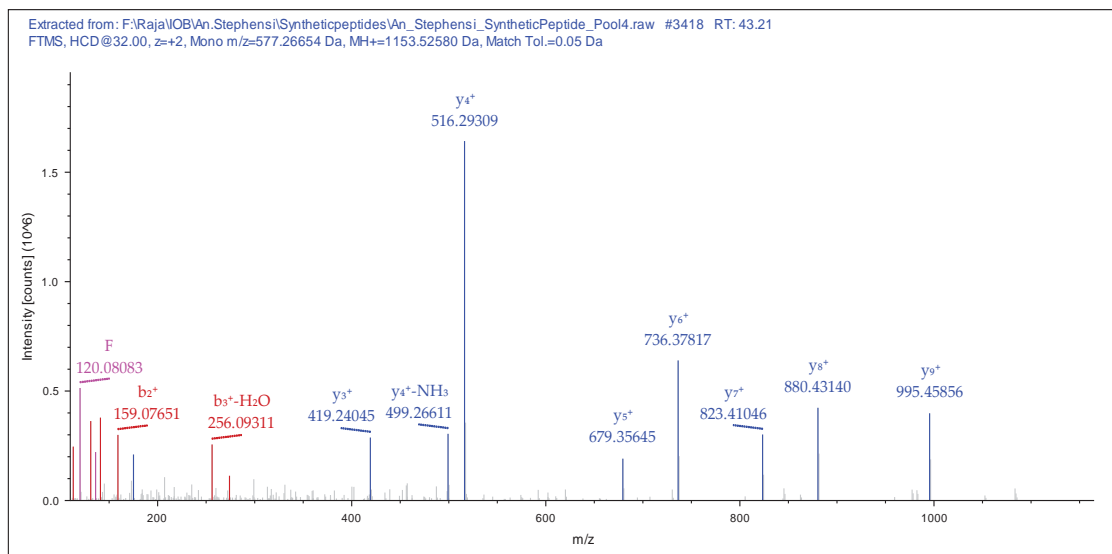

# IFGGEVVSAVTTSR

Experiment

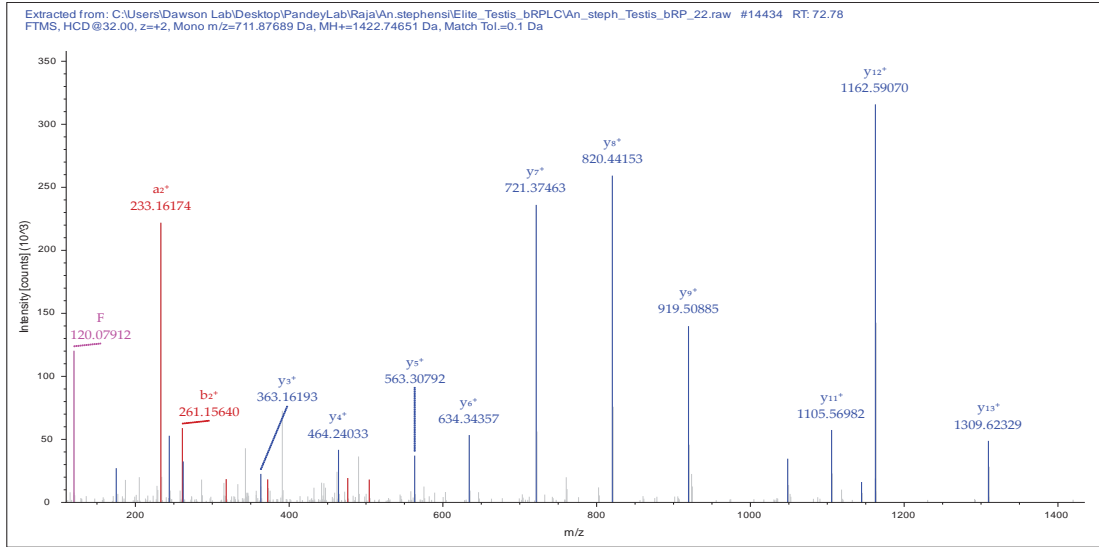

Validated

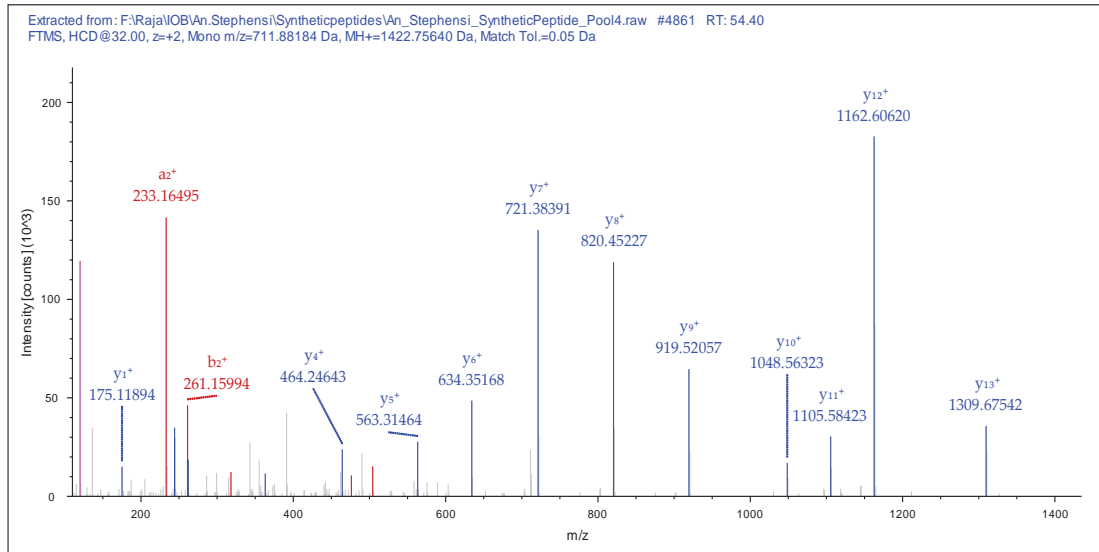

# IFLLEQLNFDK

Experiment

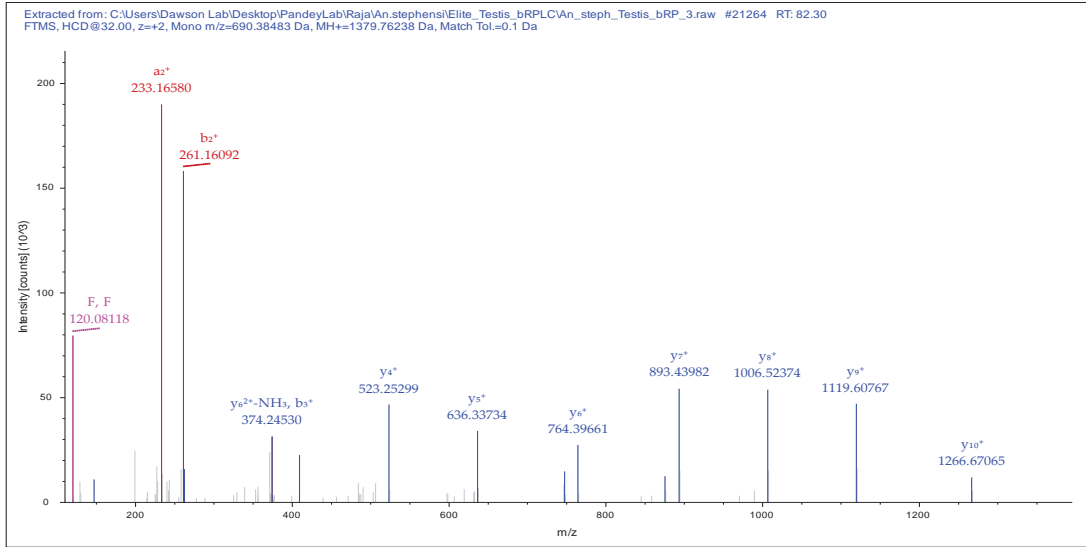

Validated

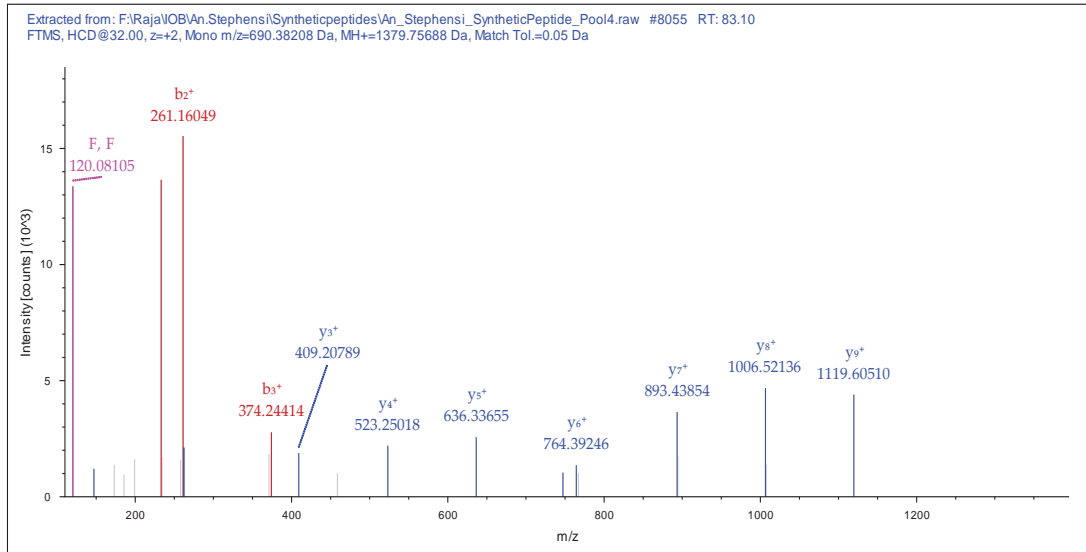

# IHELQSELDNVR

Experiment

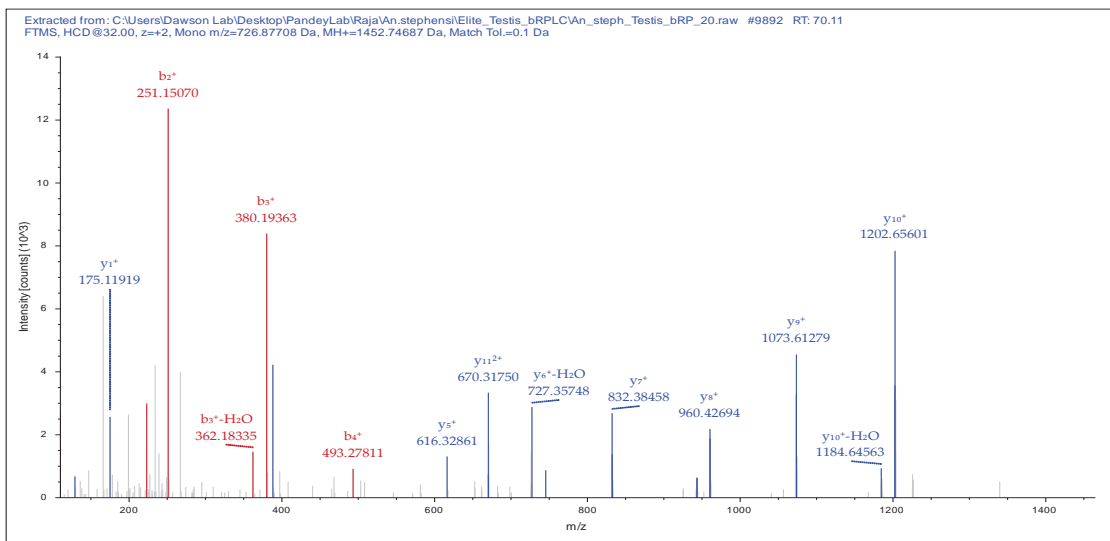

Validated

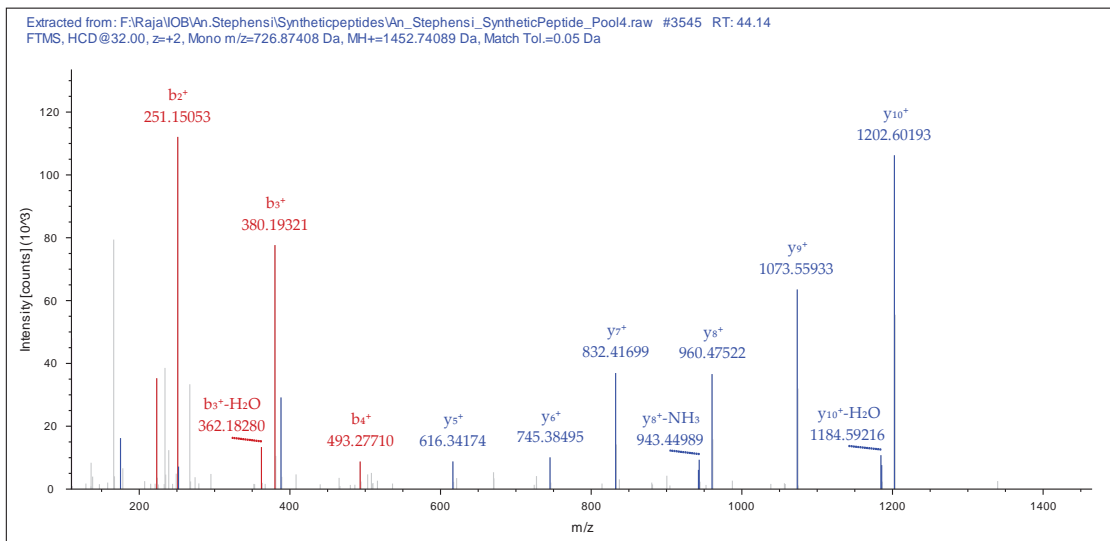

# ILSEVVL RPK

Experiment

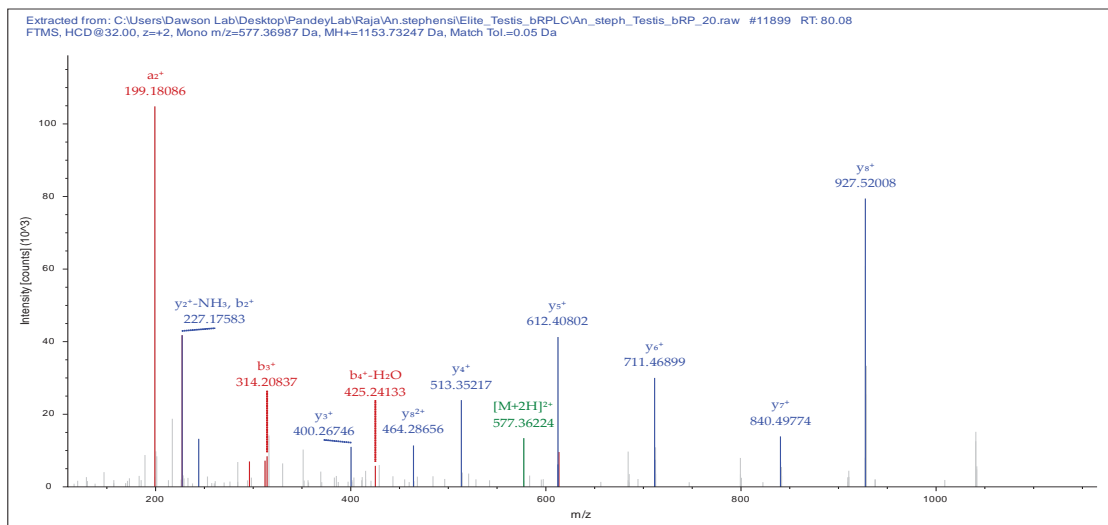

Validated

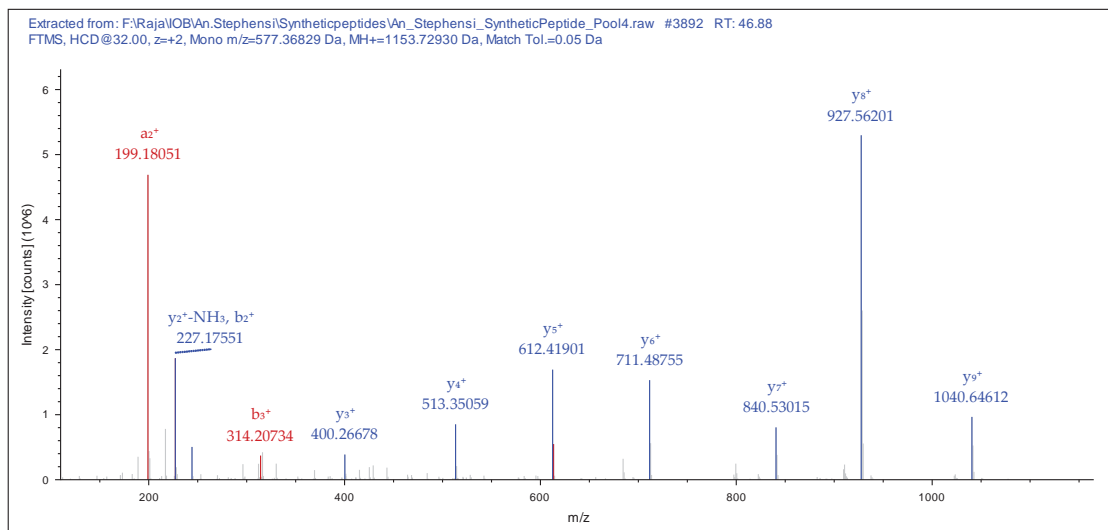

# KANDTEAAVVSER

Experiment

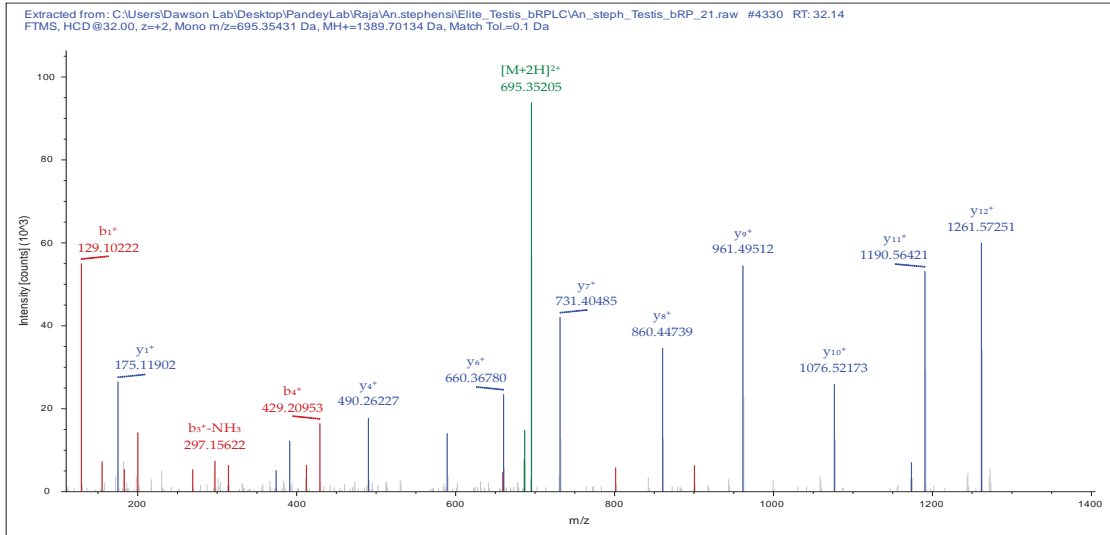

Validated

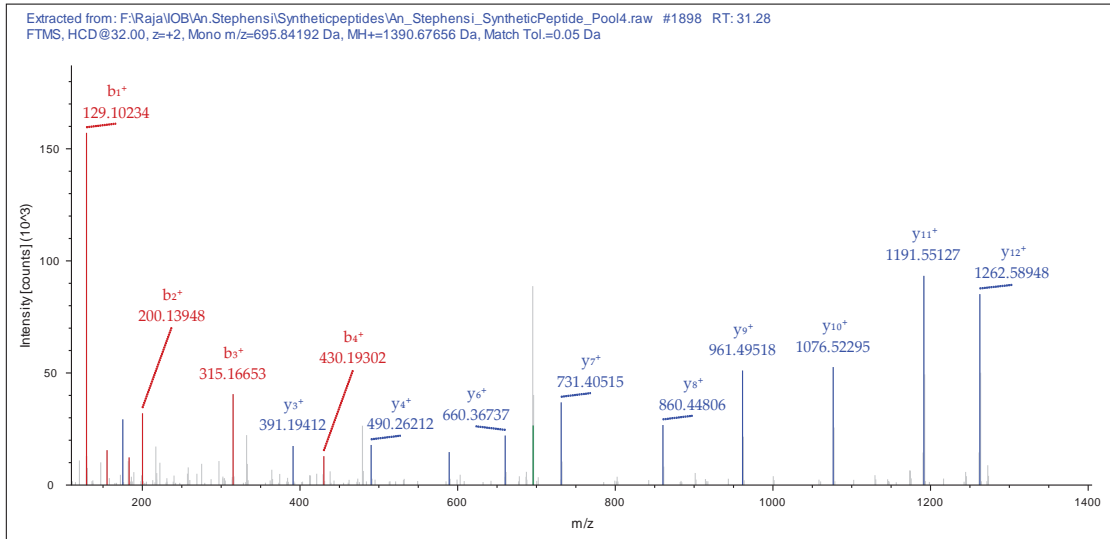

# KLQQDSSER

Experiment

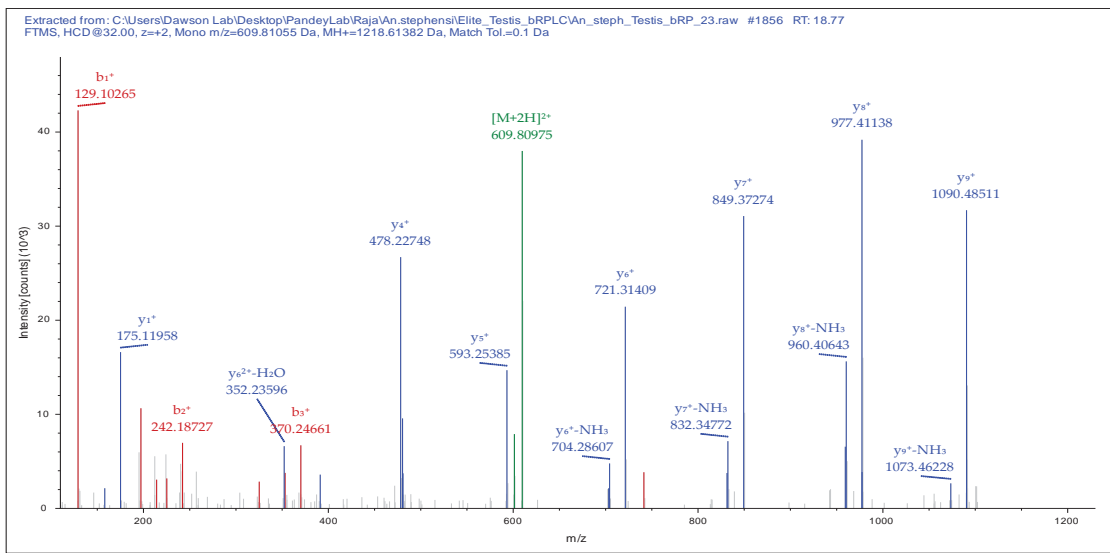

Validated

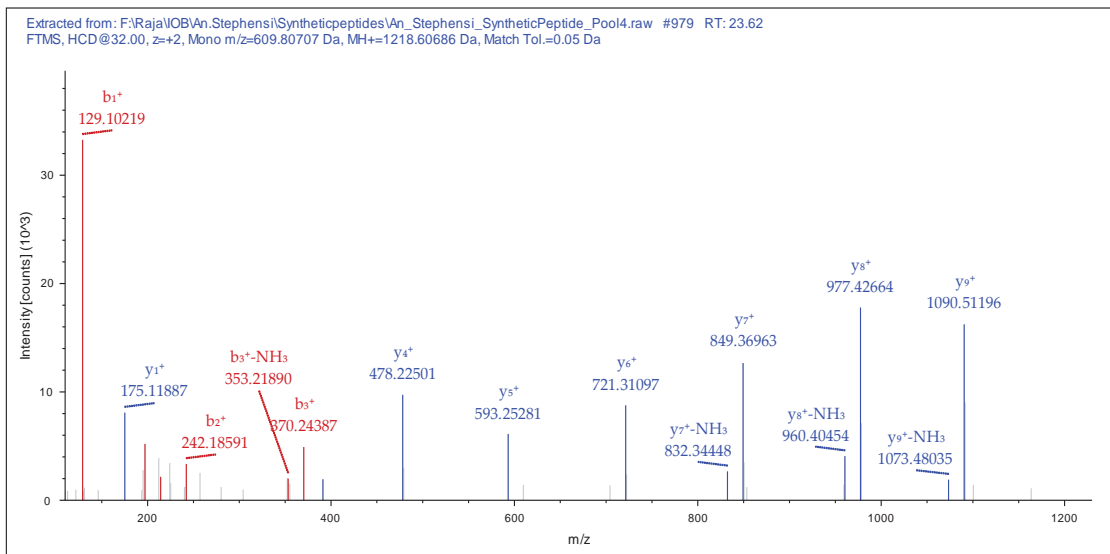



# LAAVTSSTQK

Experiment

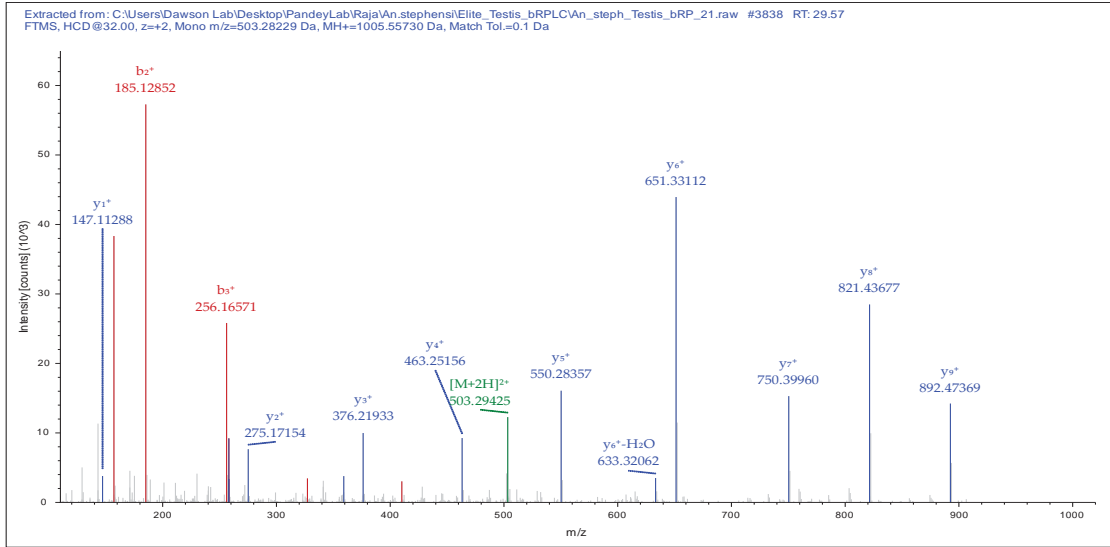

Validated

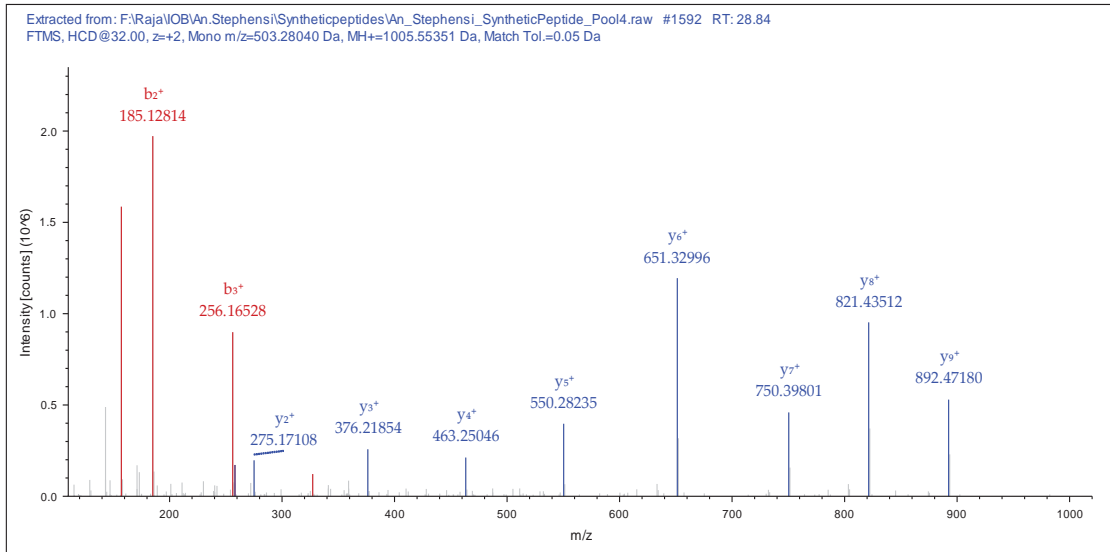

# LEVPGVYDR

Experiment

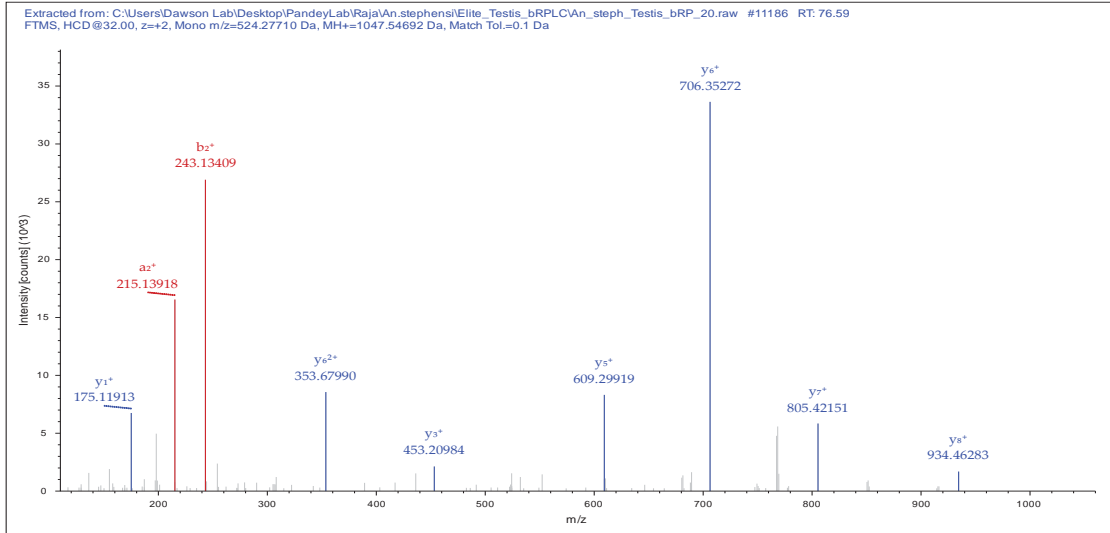

Validated

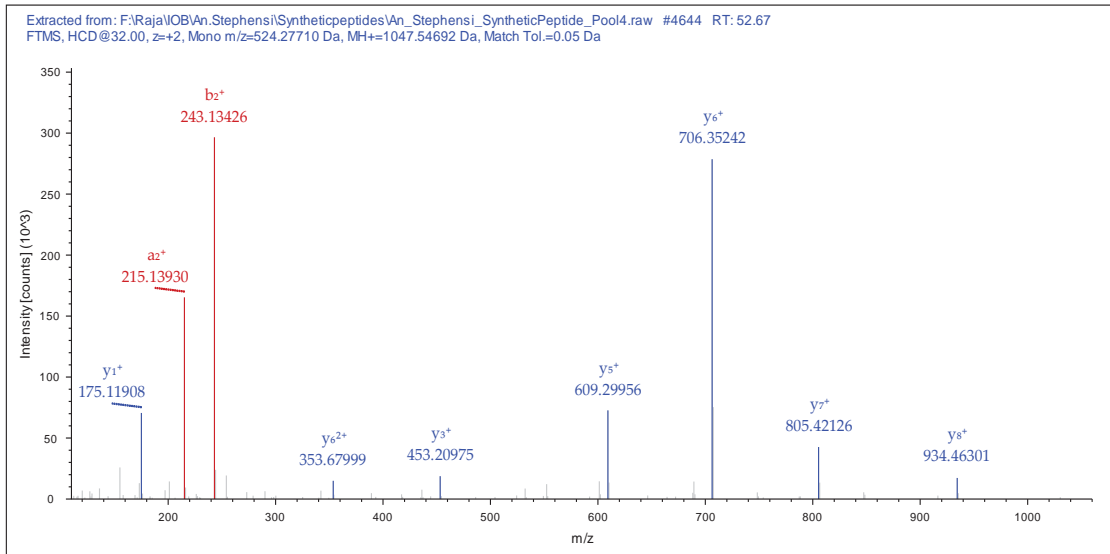

# LVVENLSTR

Experiment

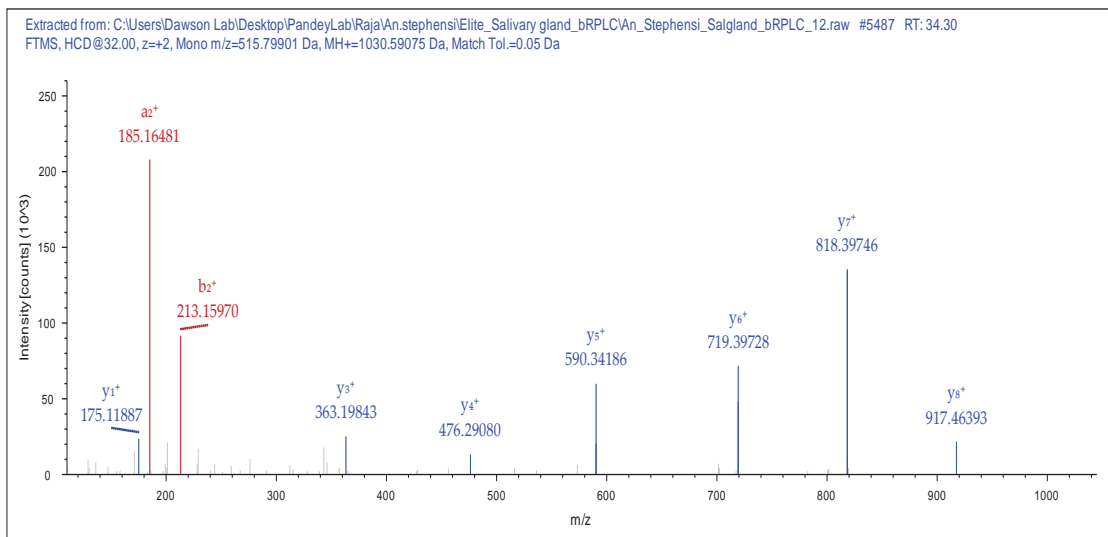

Validated

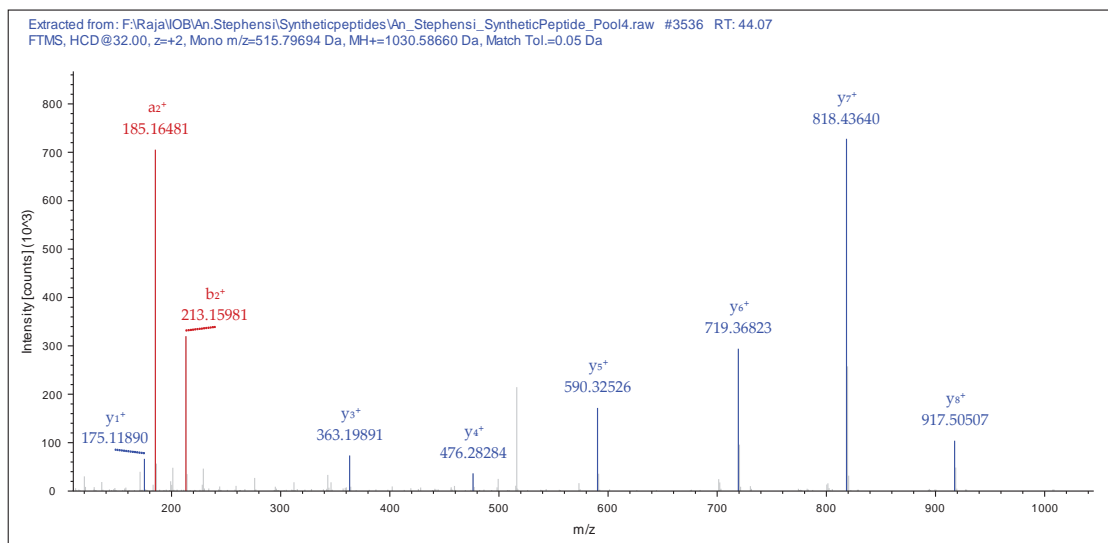

# NAAADTVDSQIK

Experiment

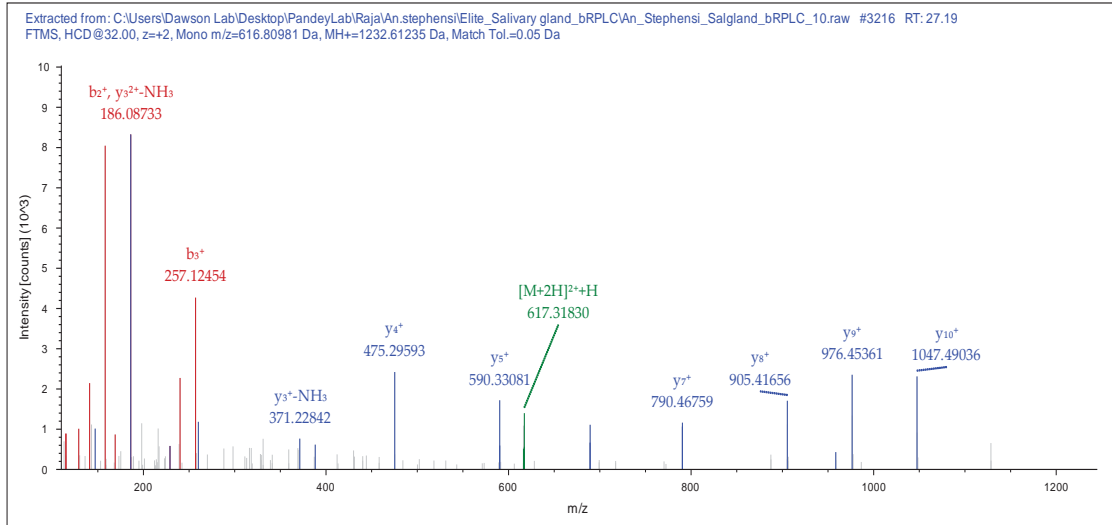

Validated

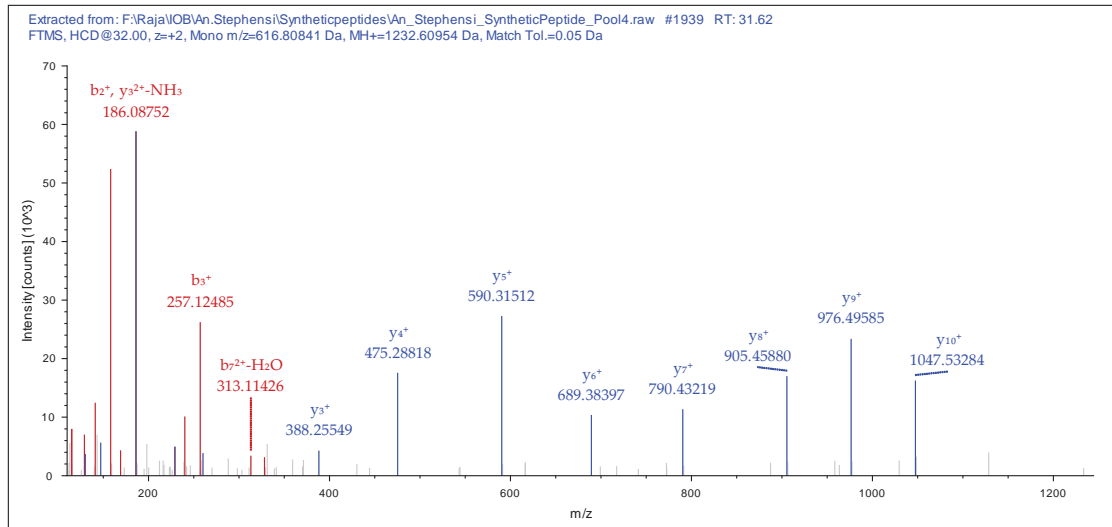

# NTGEIYEVAVVHR

Experiment

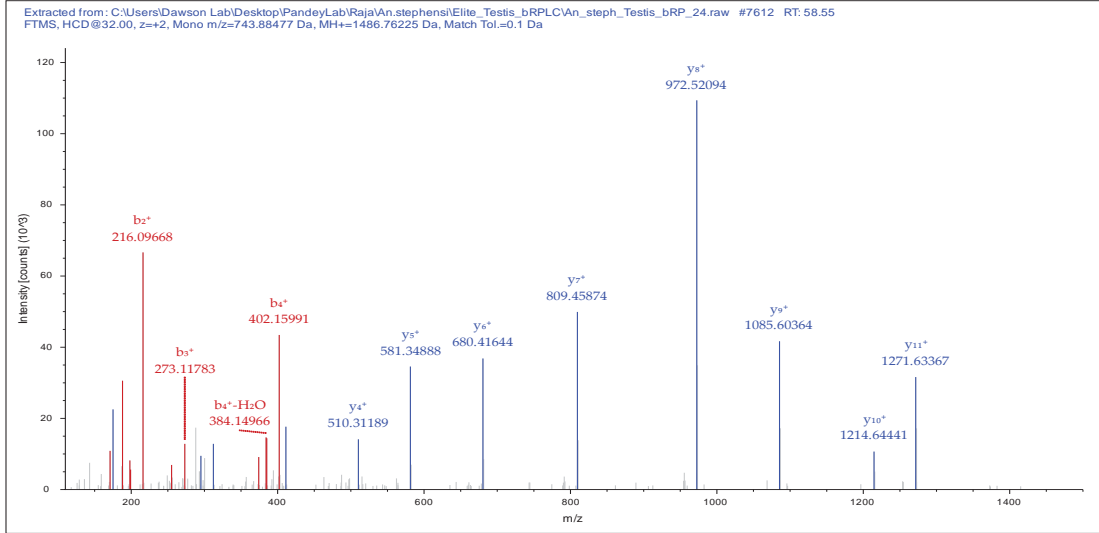

Validated

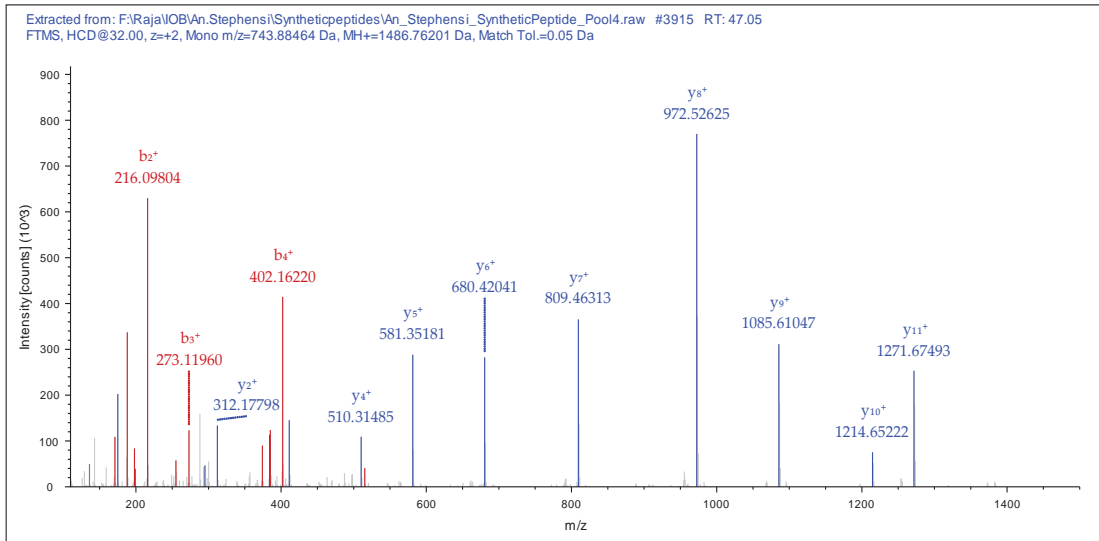

# SAAHLALENYQR

Experiment

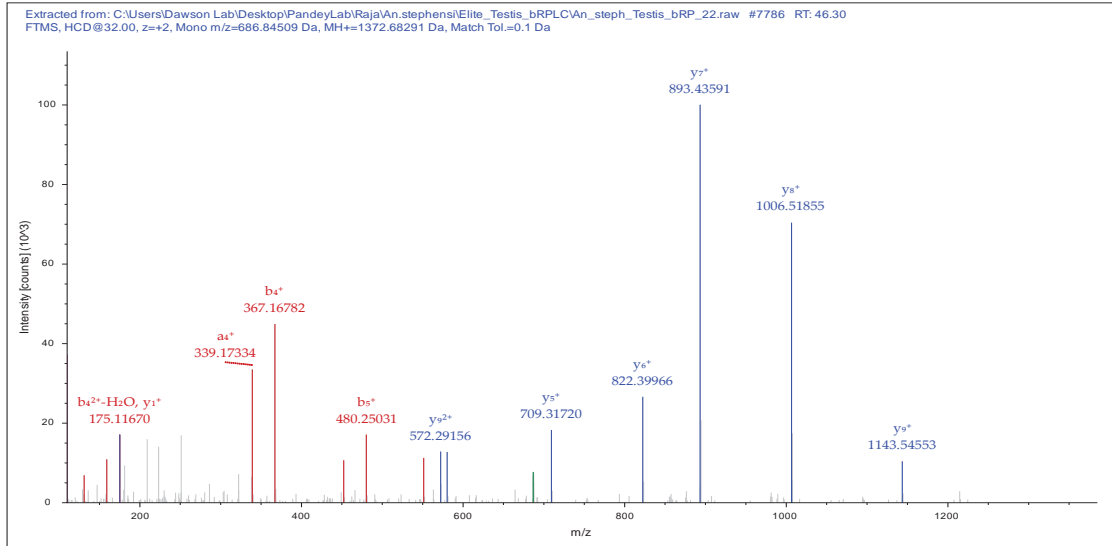

Validated

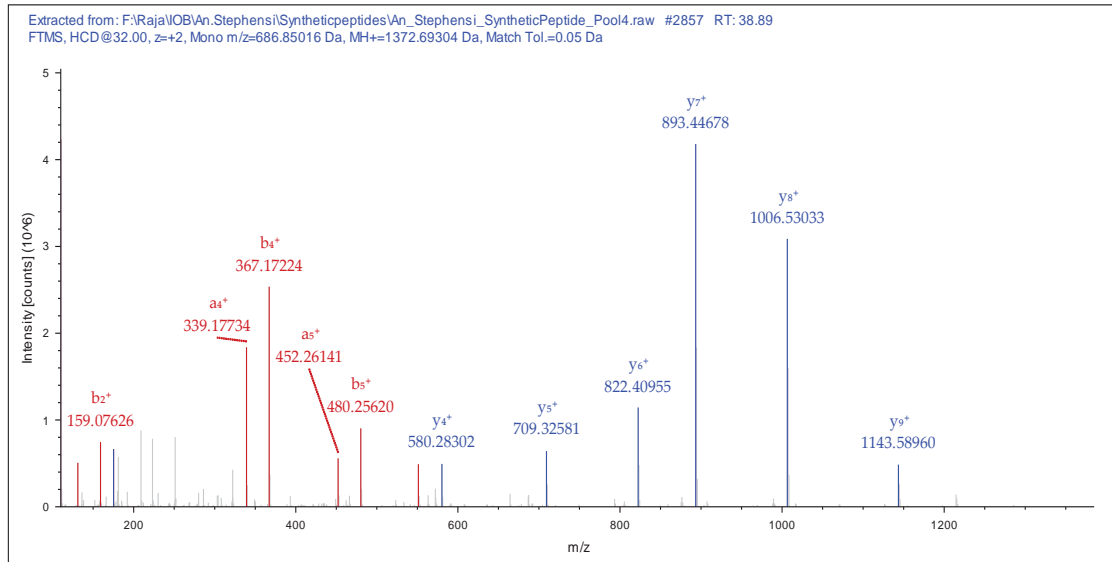

# SGSTGGPGPEWK

Experiment

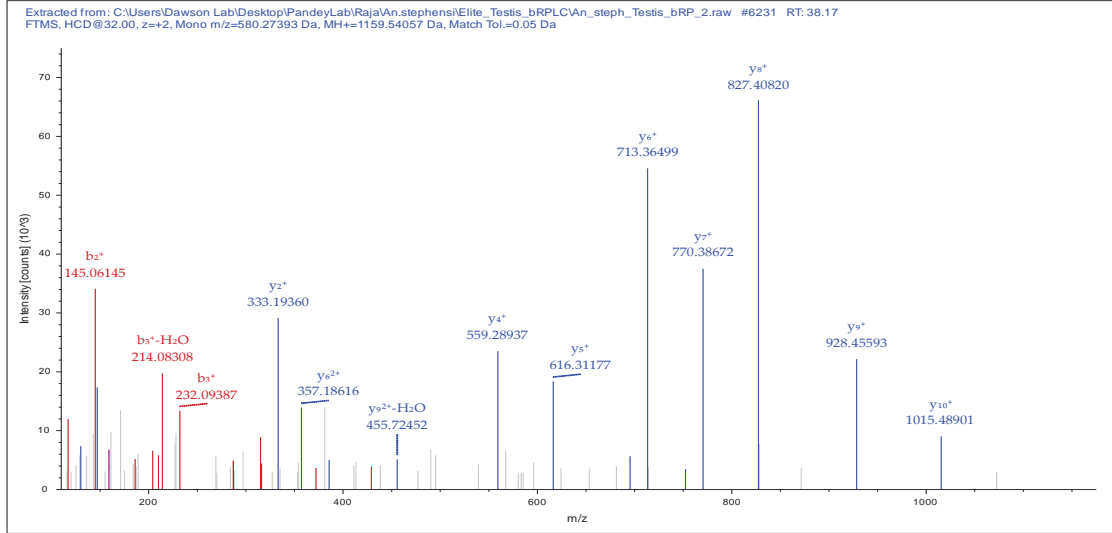

Validated

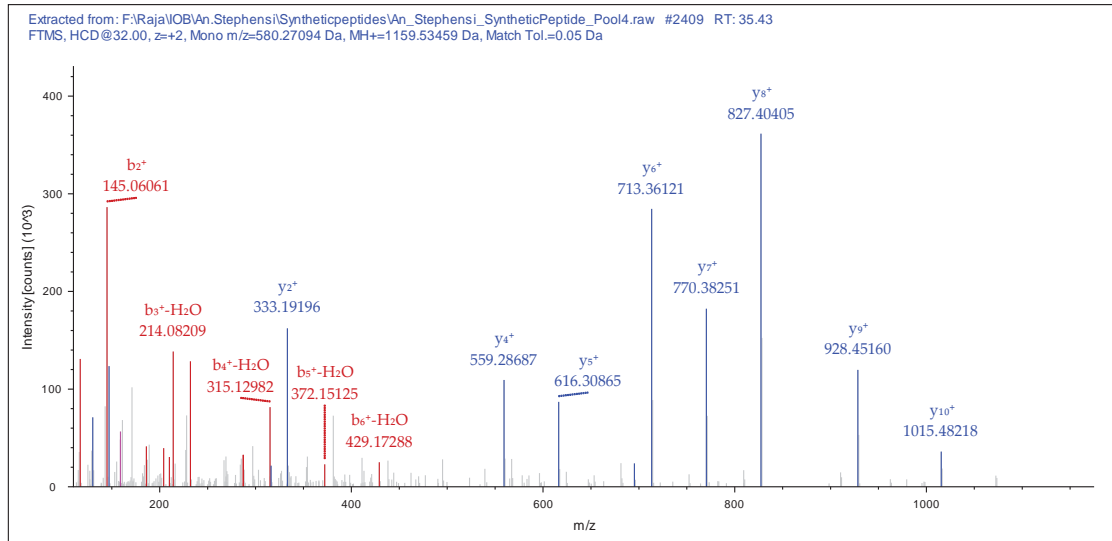

# SIFSDFIQQHR

Experiment

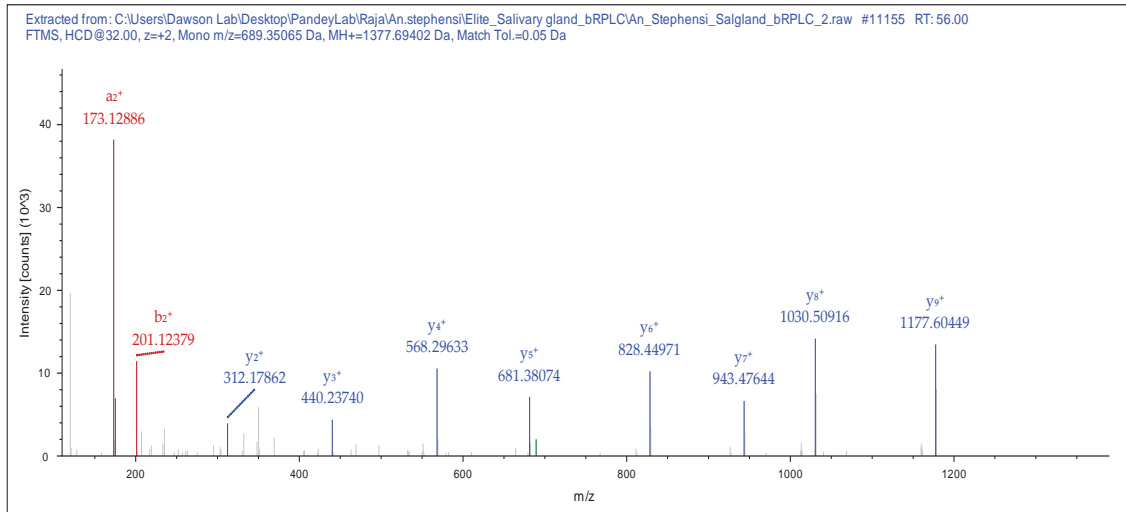

Validated

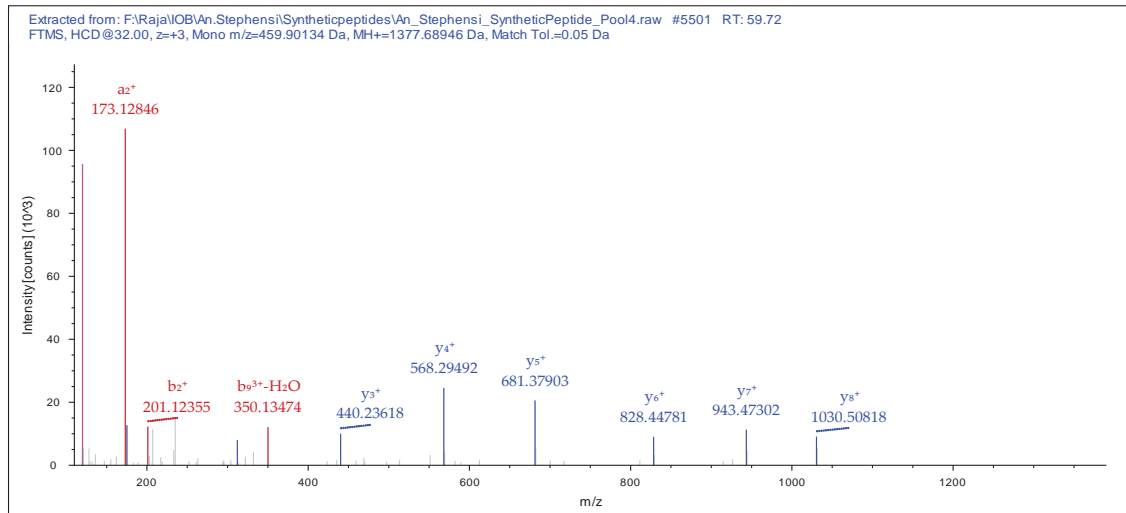



# SPQGPASEK

Experiment

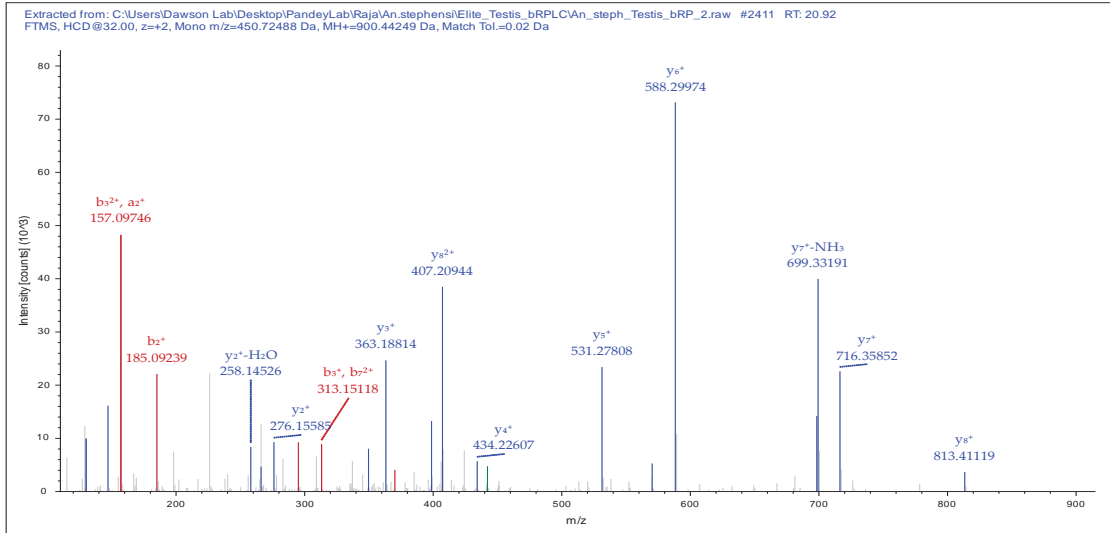

Validated

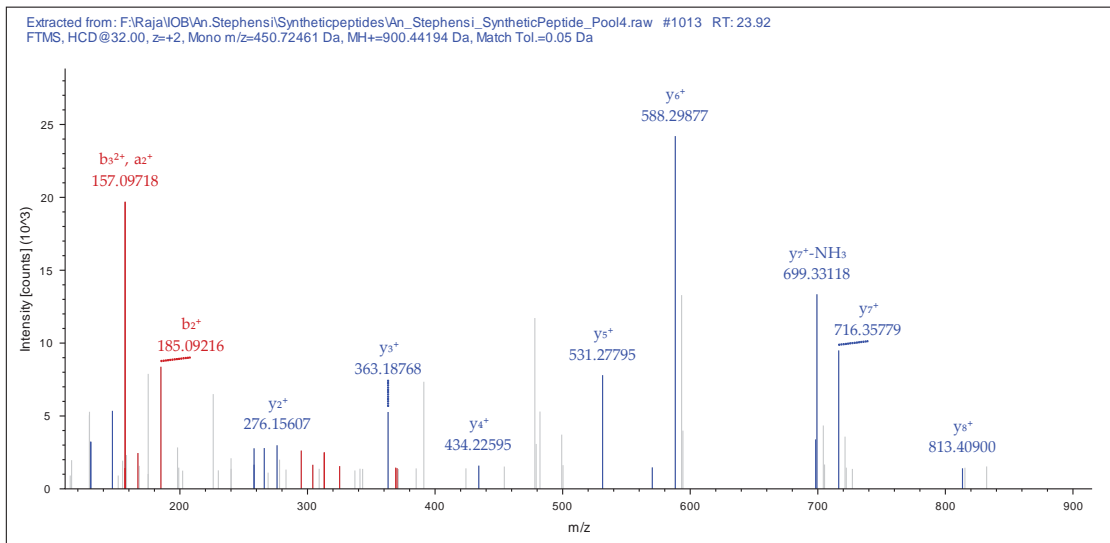

# TPYFSSIPTR

Experiment

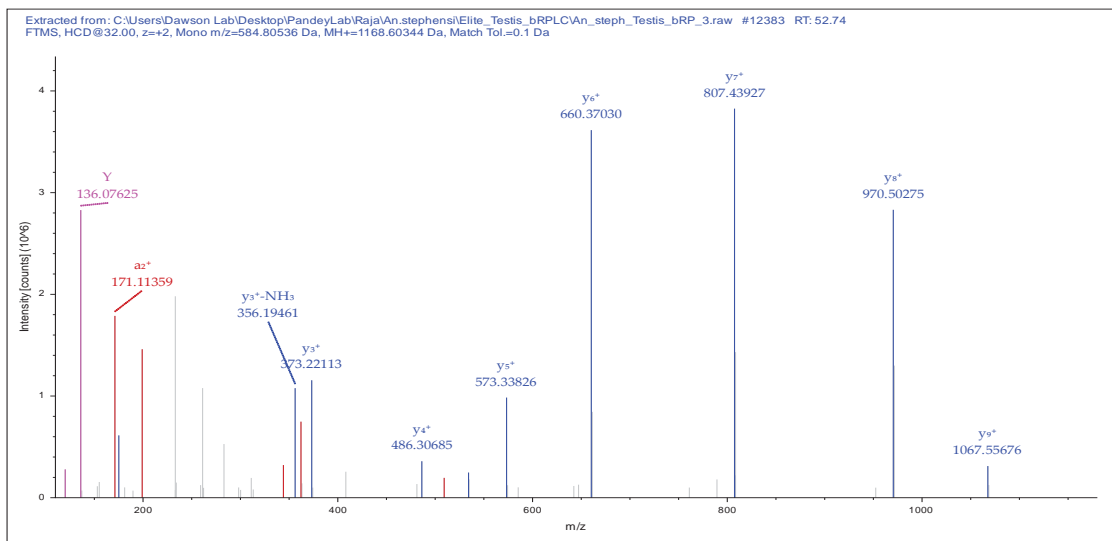

Validated

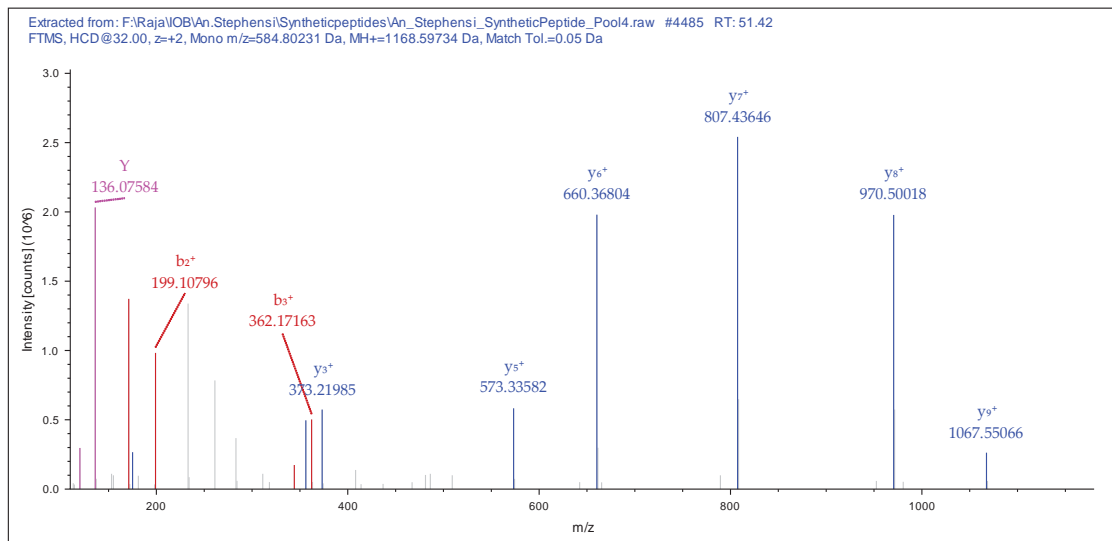

# TQYSNVDQR

Experiment

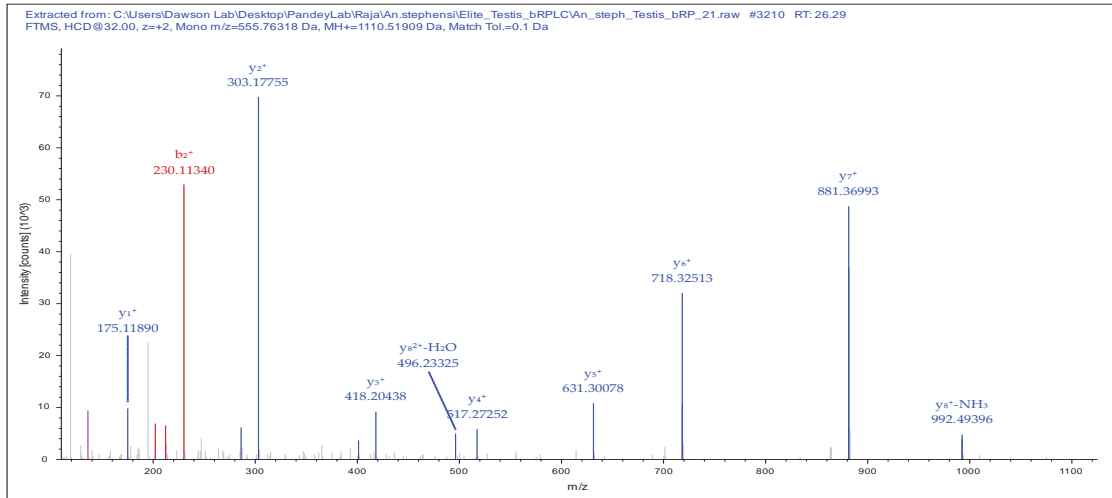

Validated

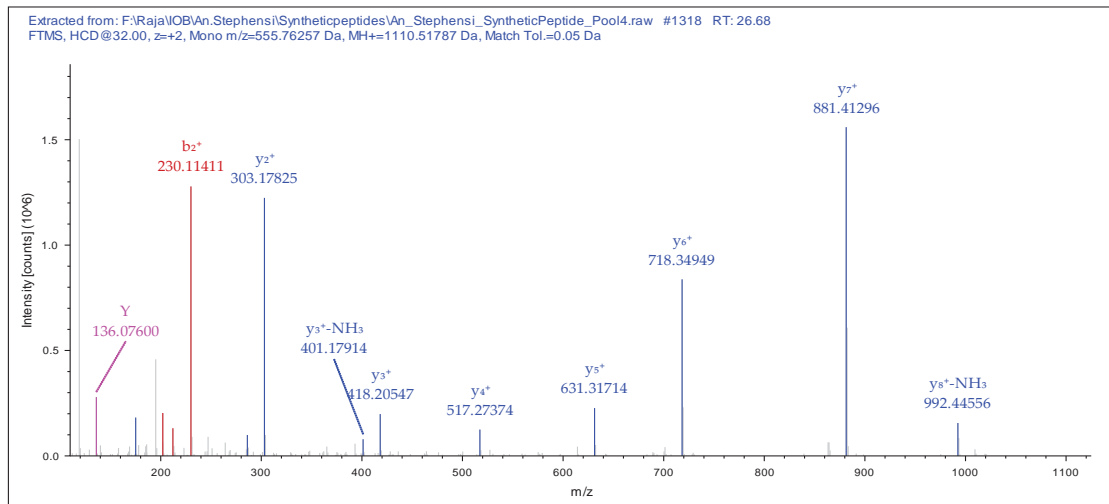

# VNTGGETNVR

Experiment

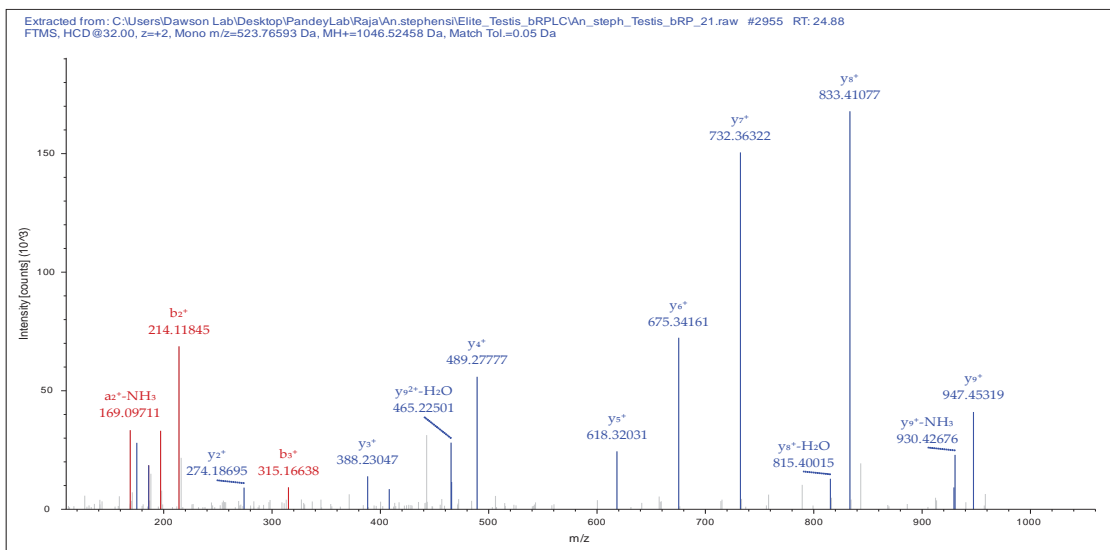

Validated

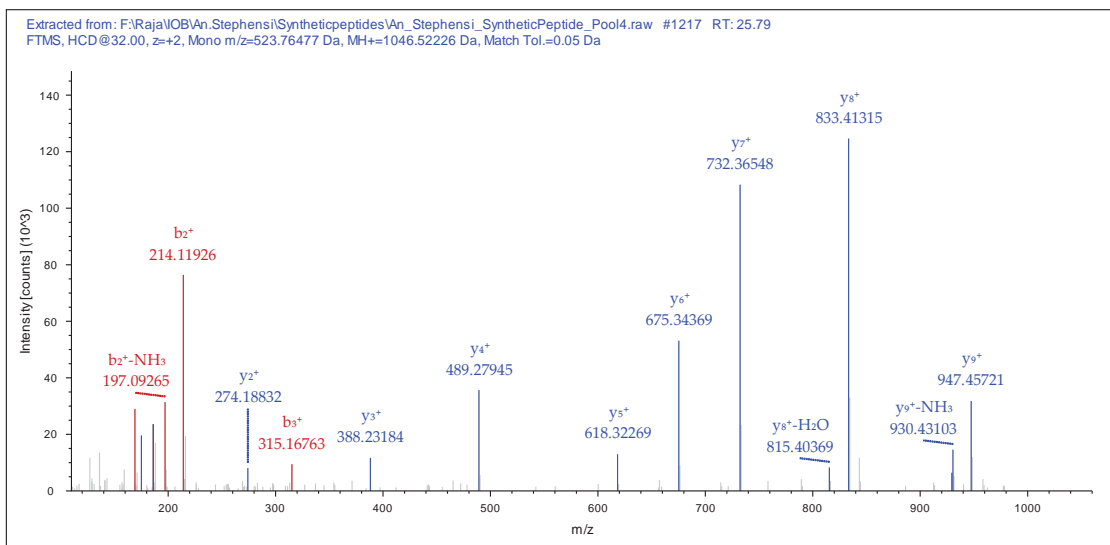

# VSPEELEQR

Experiment

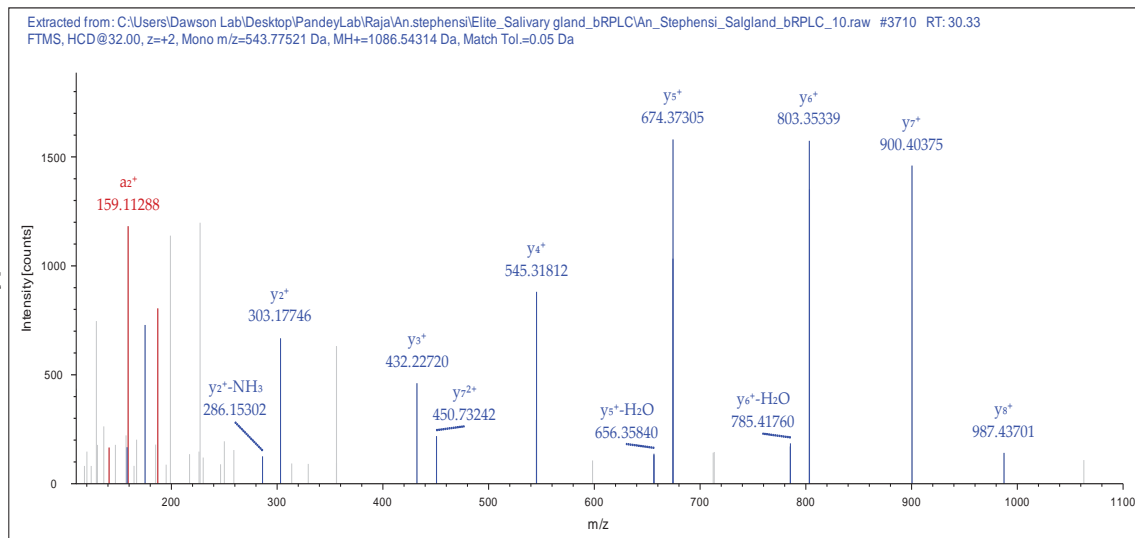

Validated

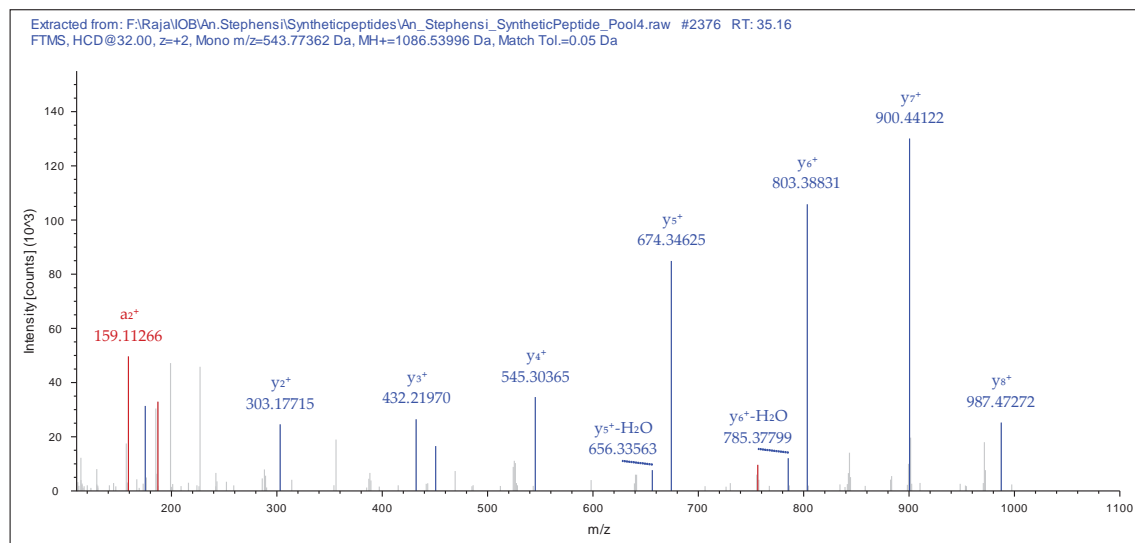

# YDPTIEDFYR

Experiment

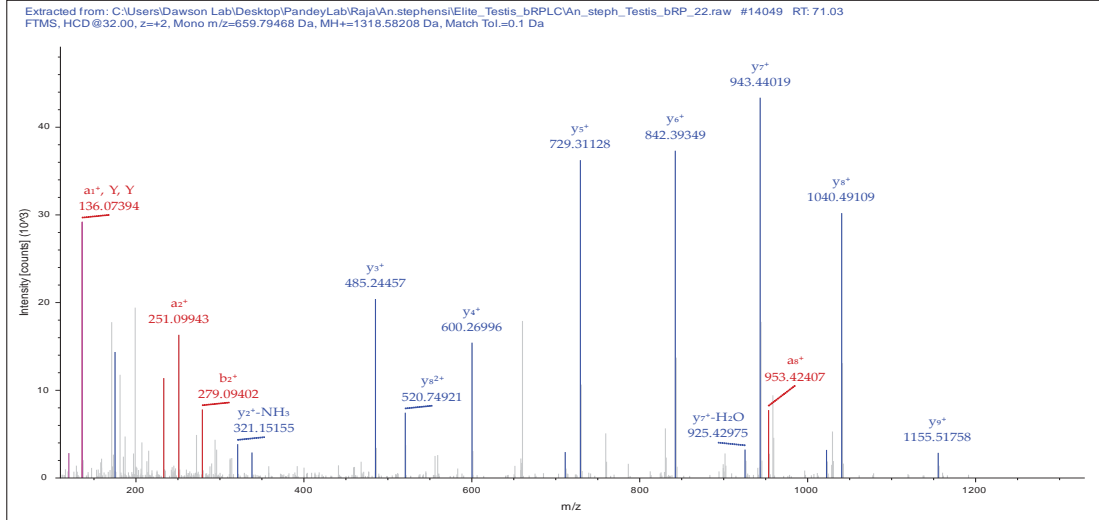

Validated

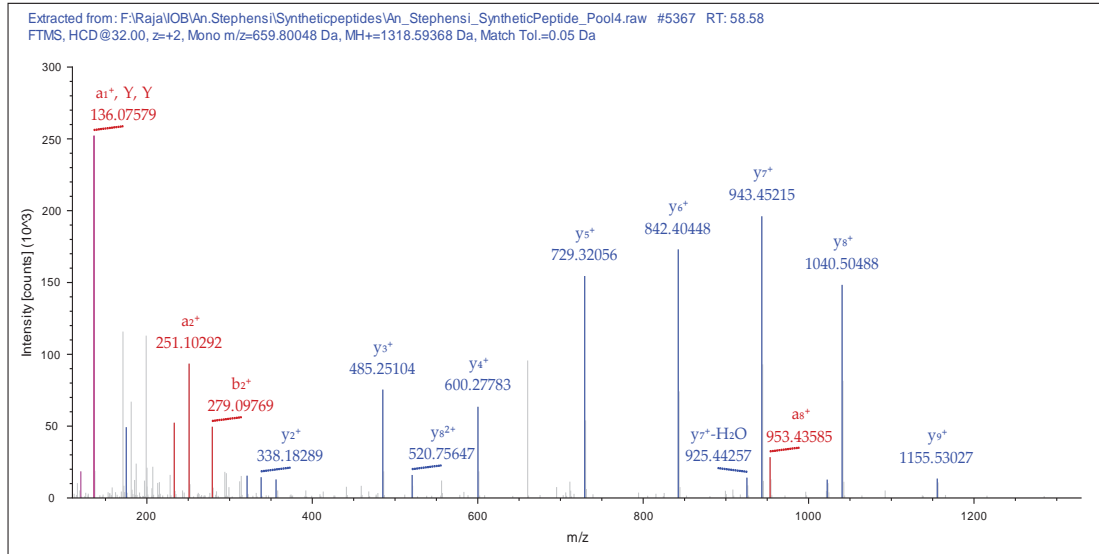

# YGFVEVETPTLFR

Experiment

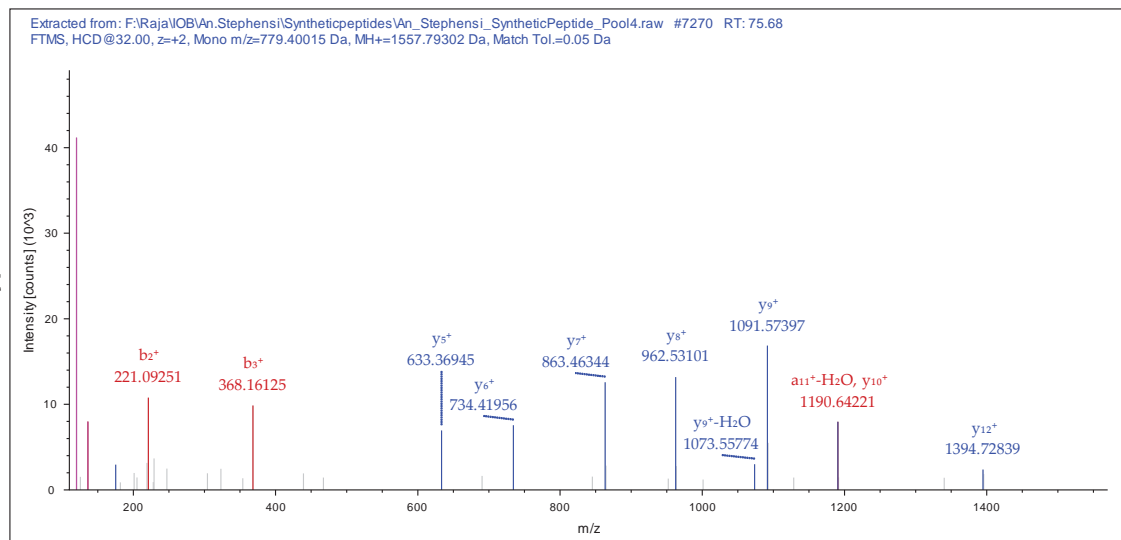

Validated

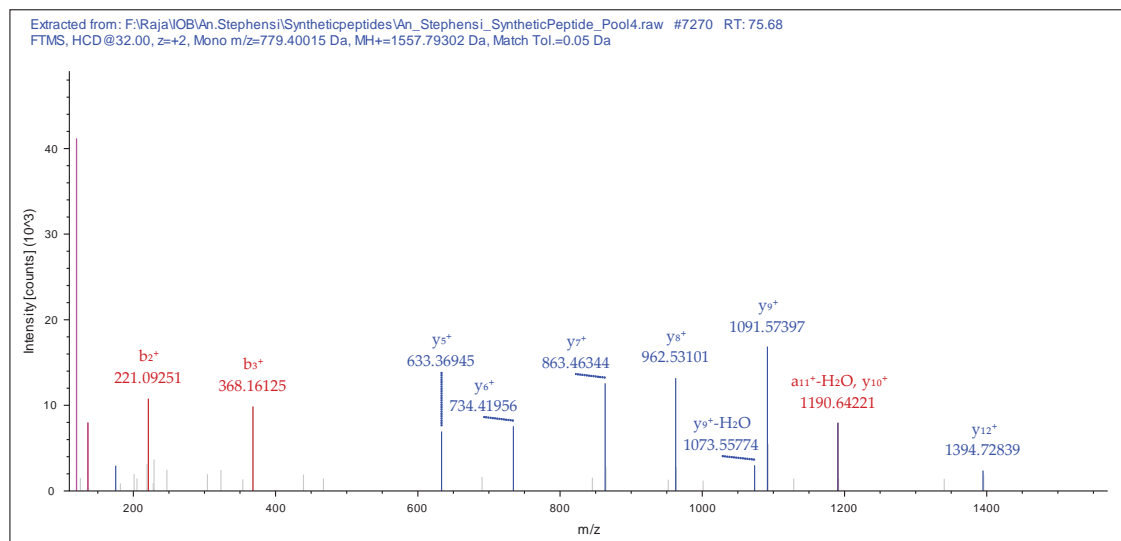

# KIQIVESLLESLK

Experiment

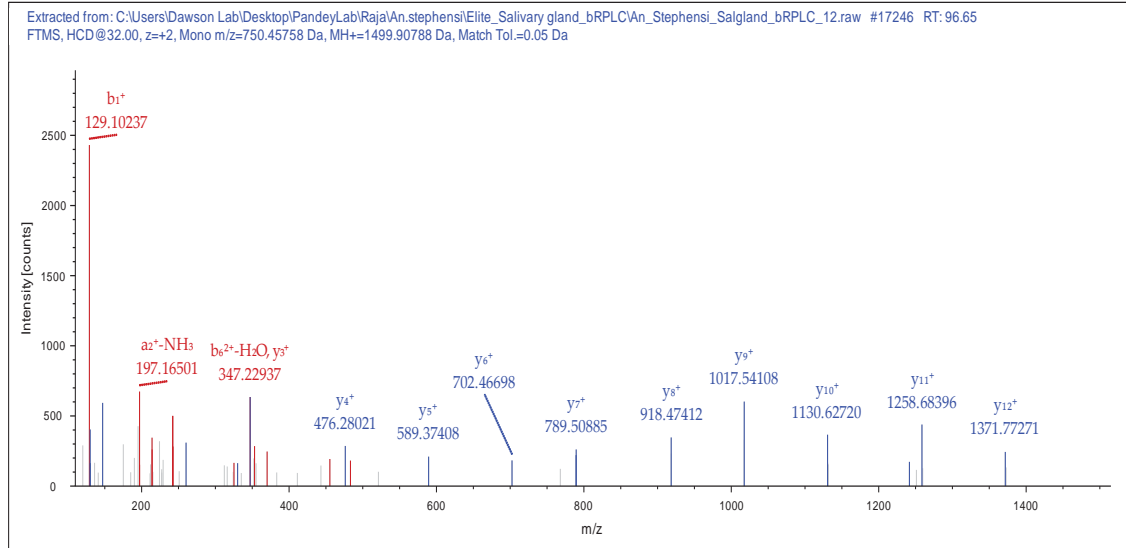

Validated

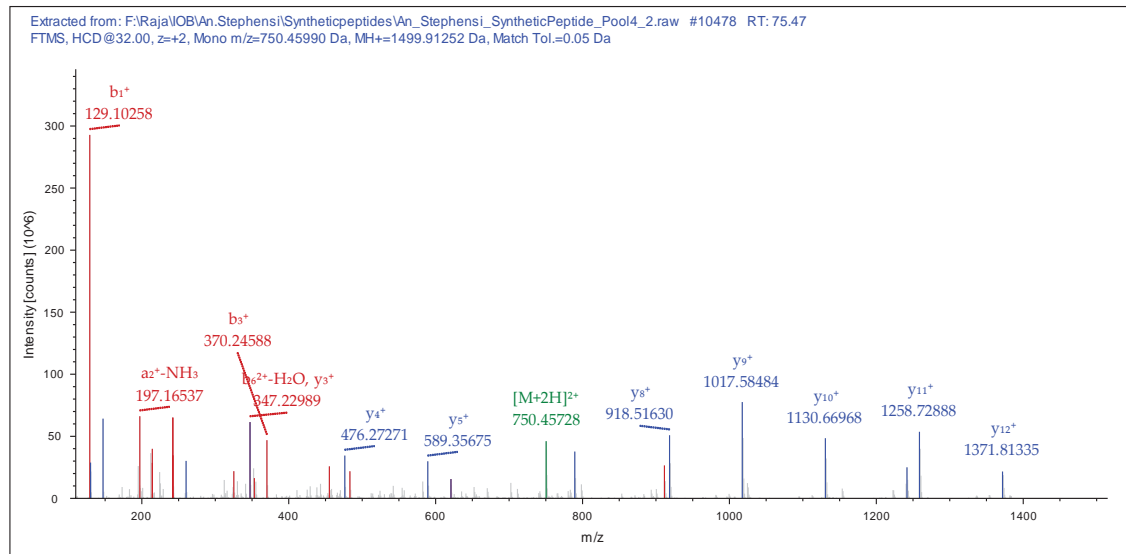



# INIQLHYGTR

Experiment

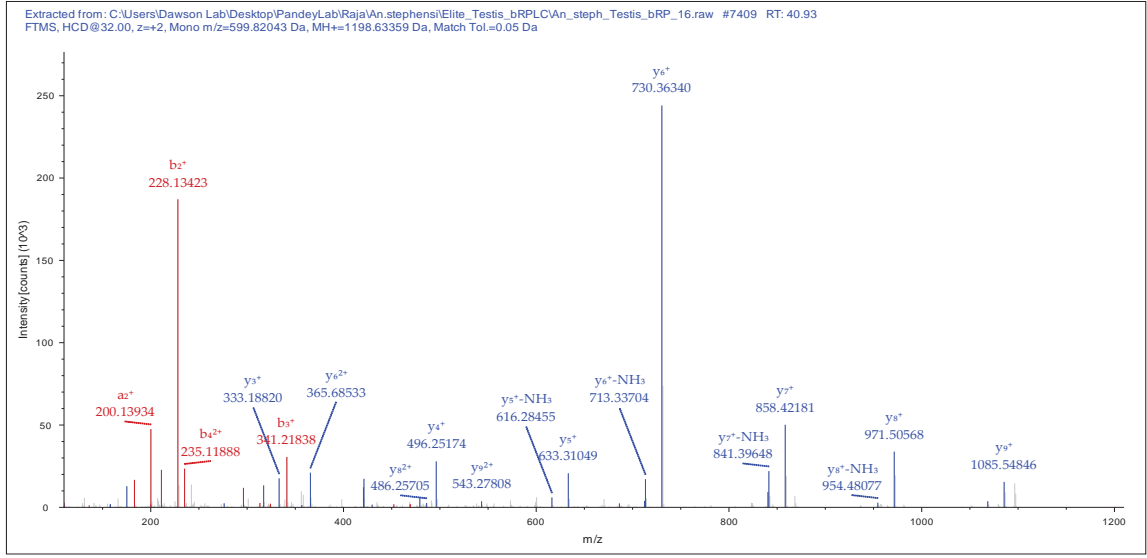

Validated

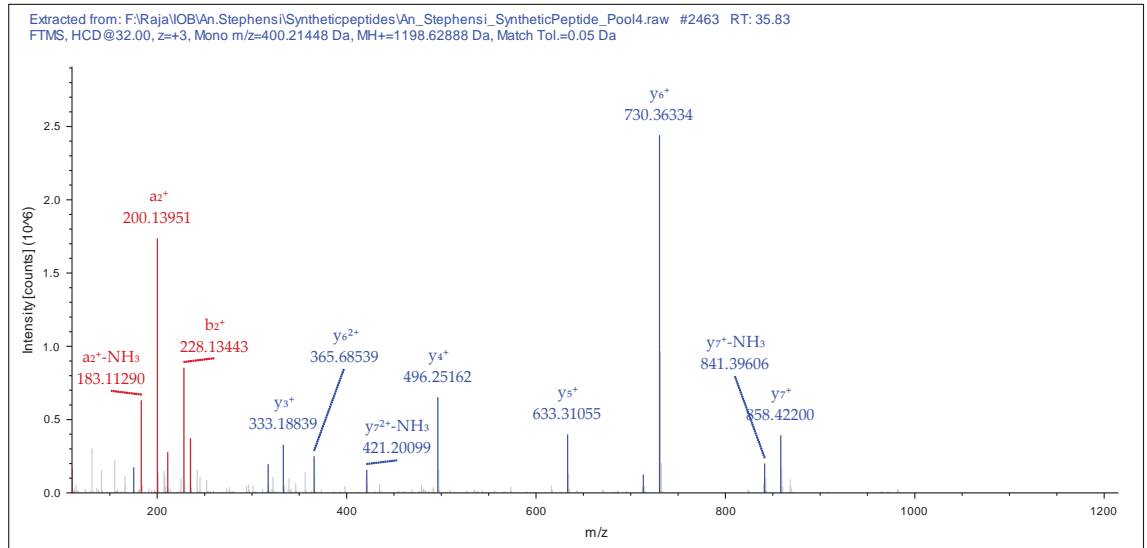

# AVSASTATGTK

Experiment

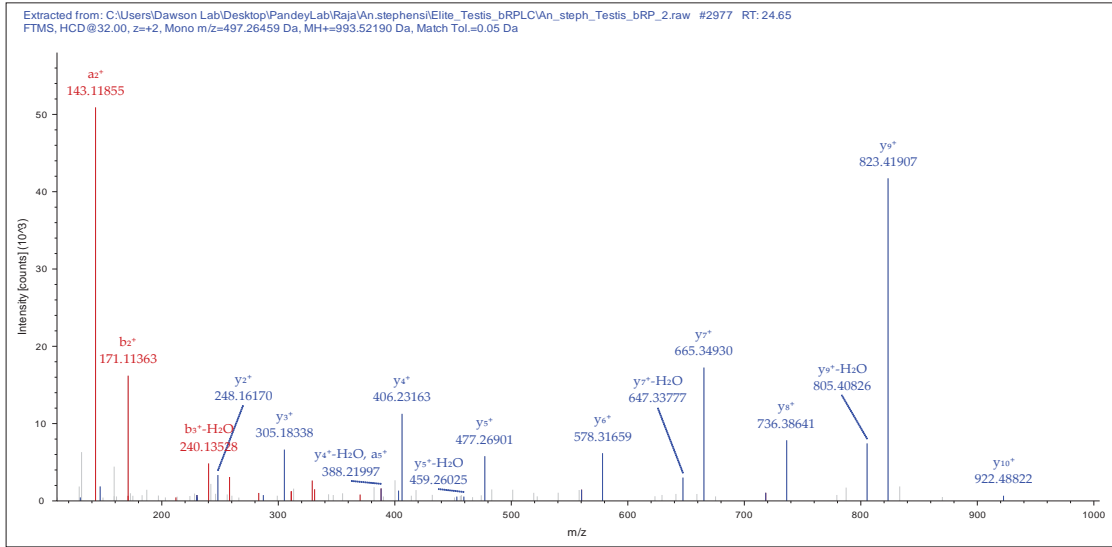

Validated

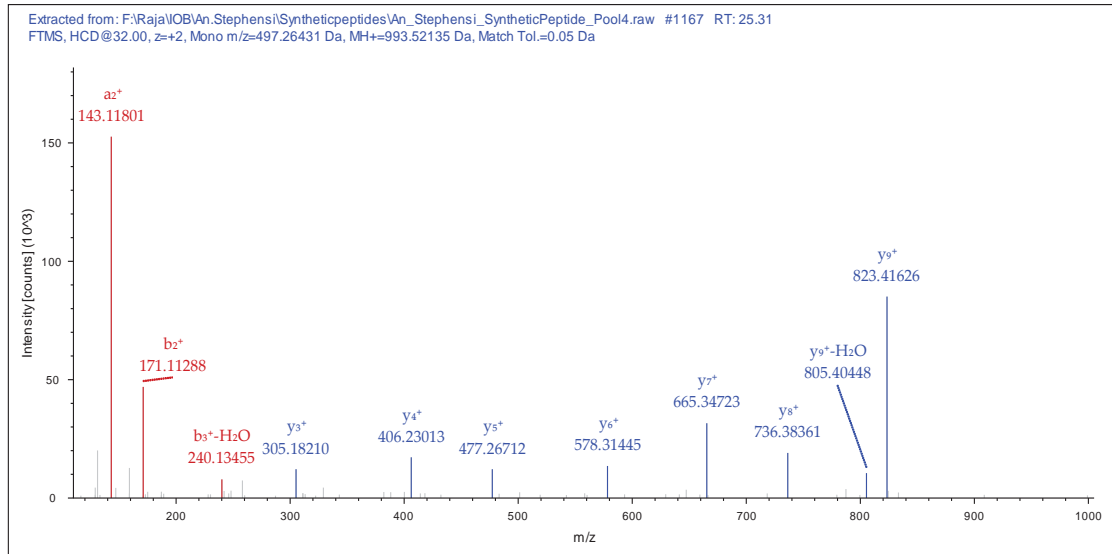

# SEPYDDWGLEGILR

Experiment

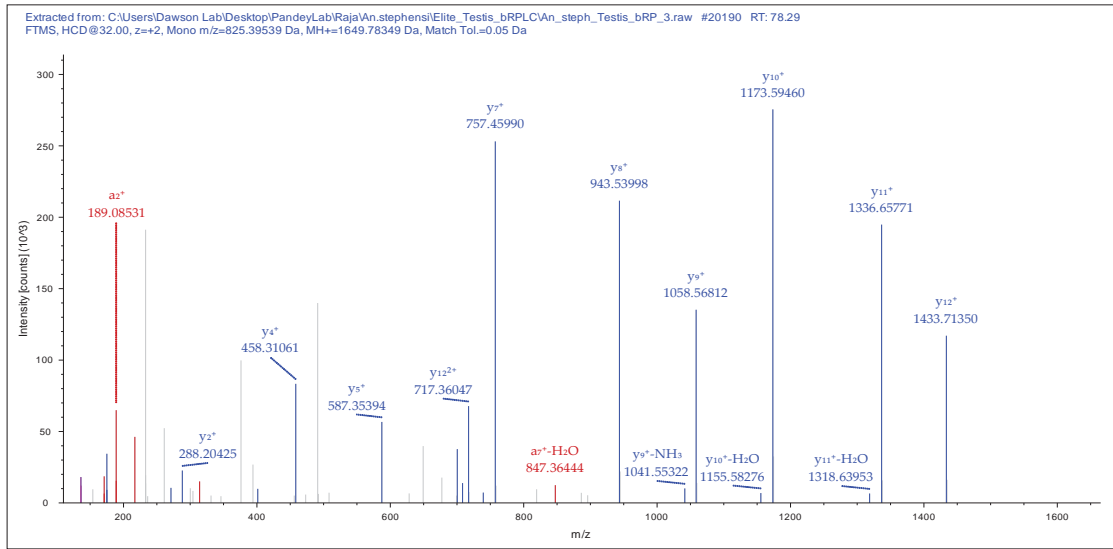

Validated

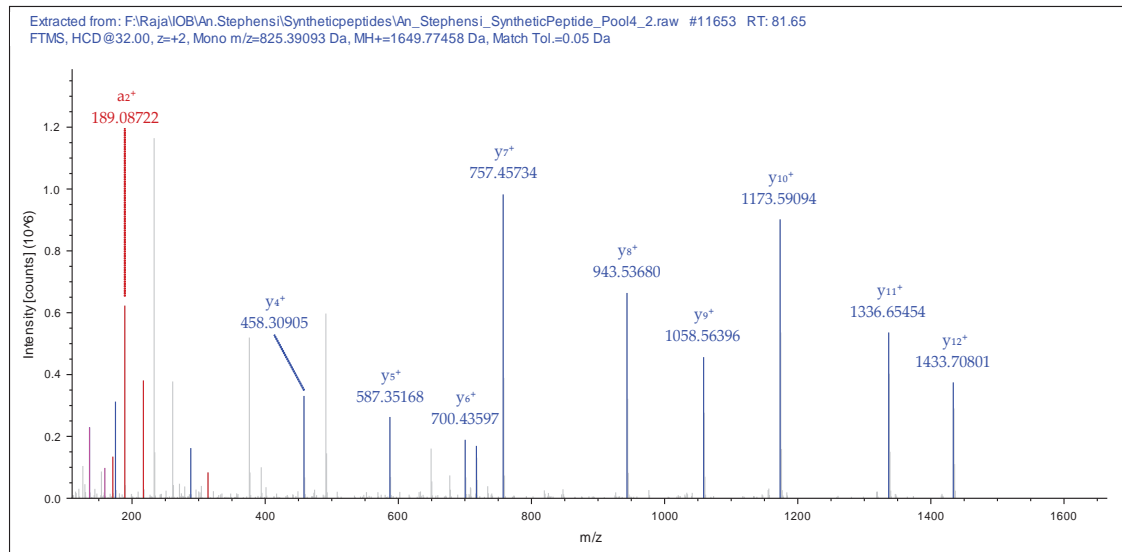

# SPYSWDLPADWK

Experiment

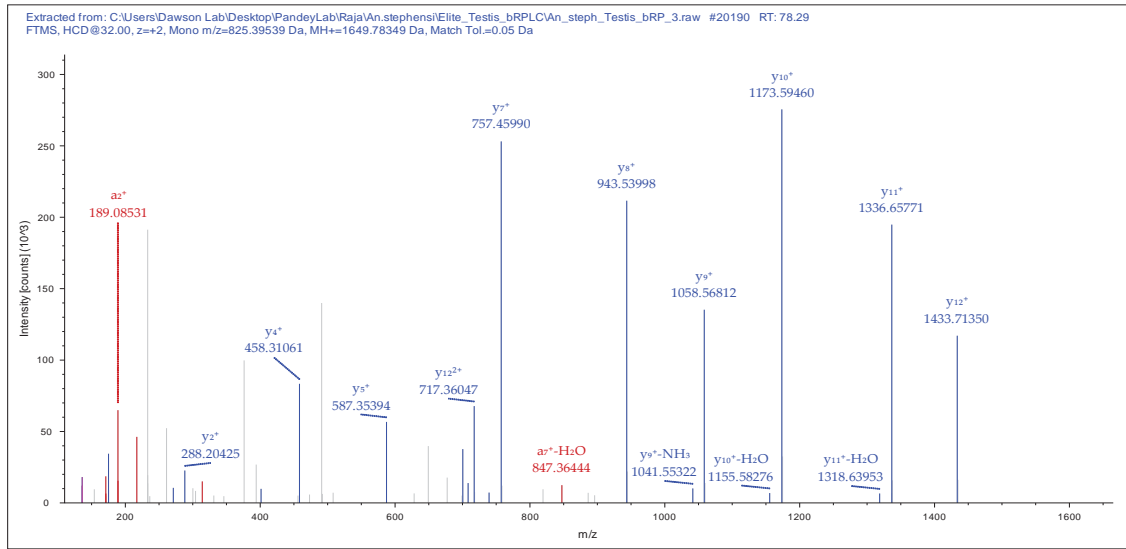

Validated

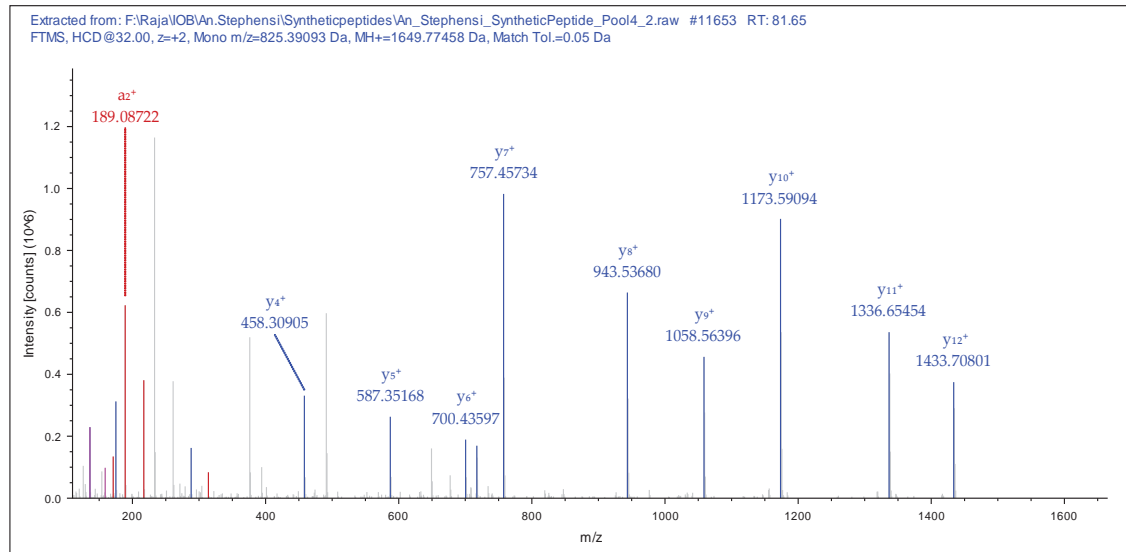

# YYSENGLDGYK

Experiment

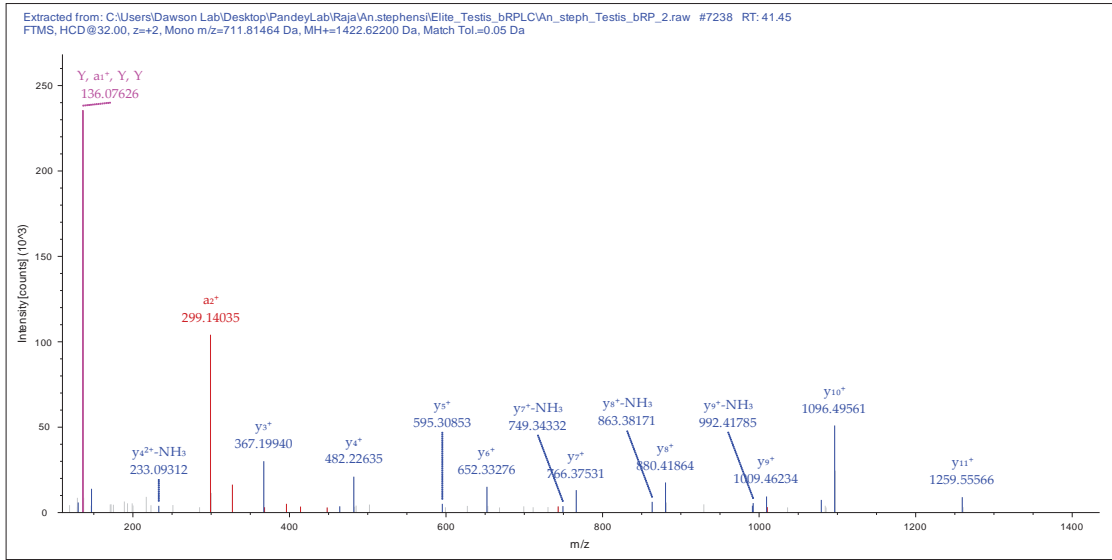

Validated

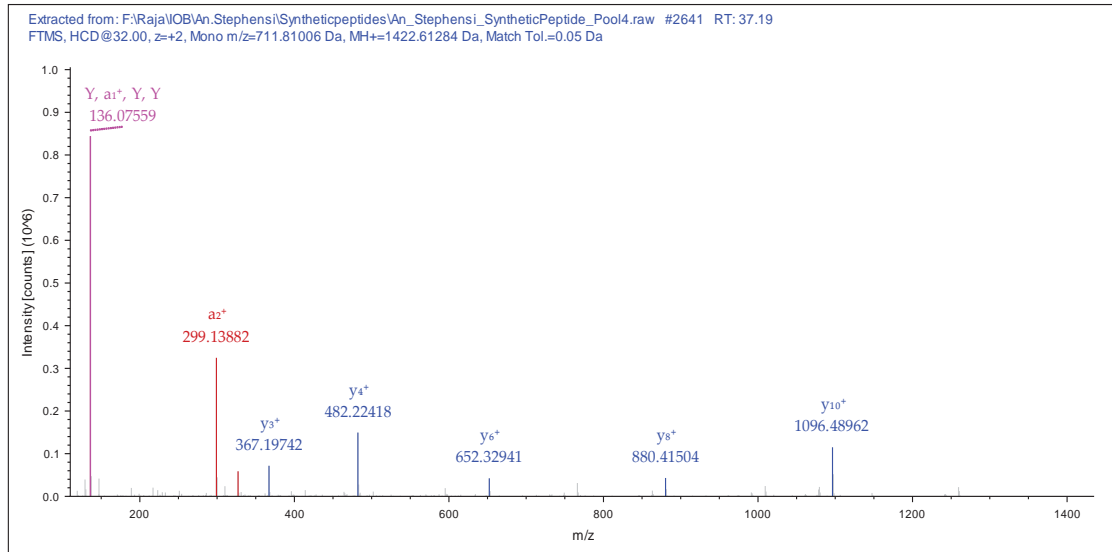

# AAGSDDHVL R

Experiment

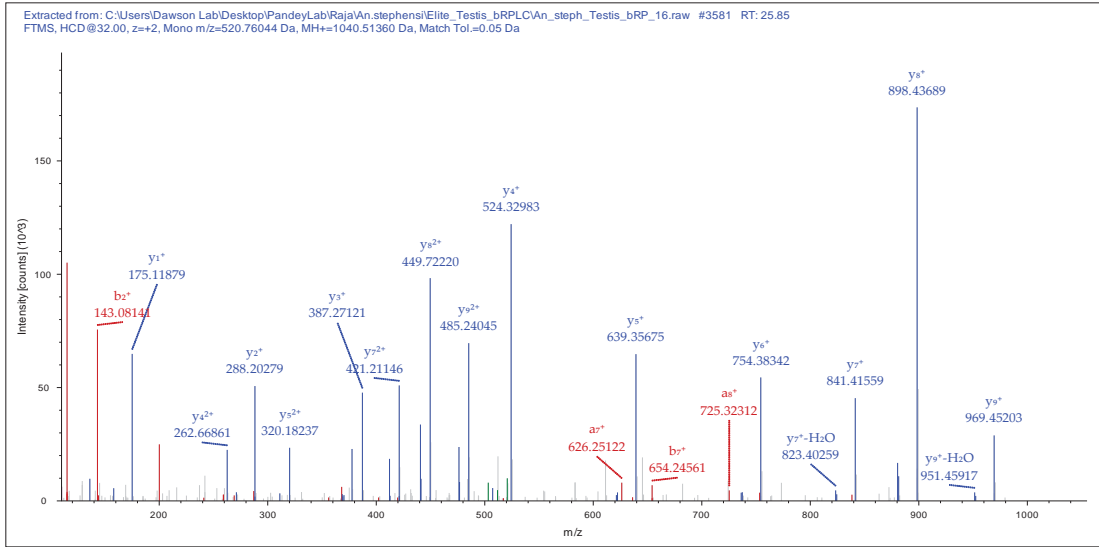

Validated

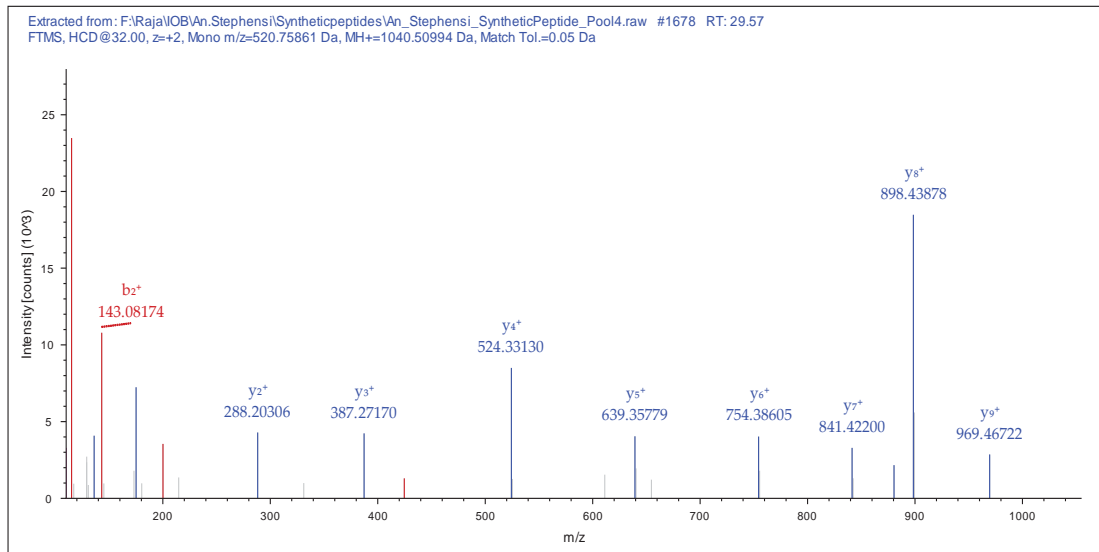

# QAFAIER

Experiment

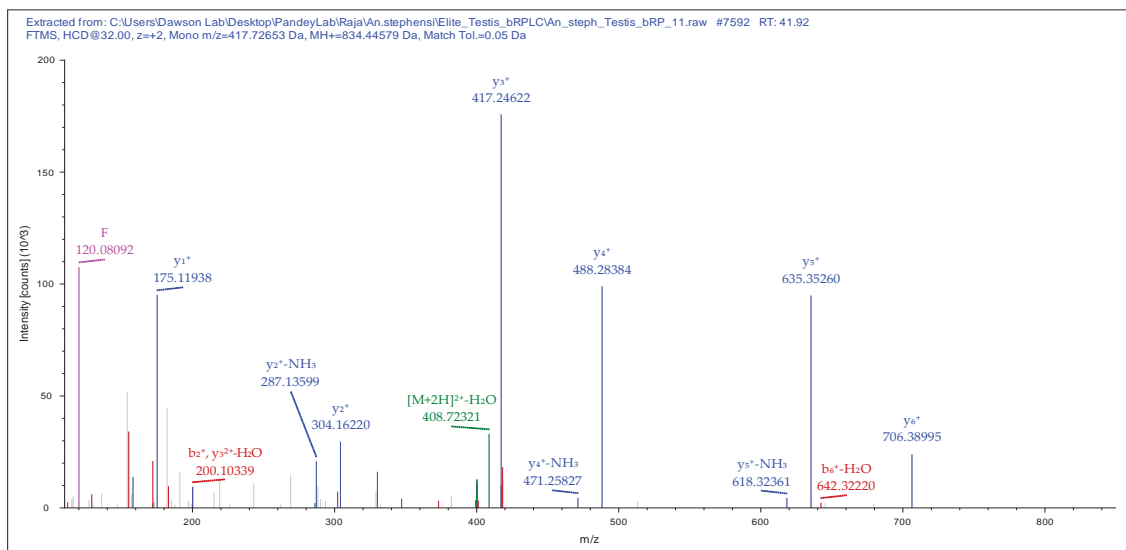

Validated

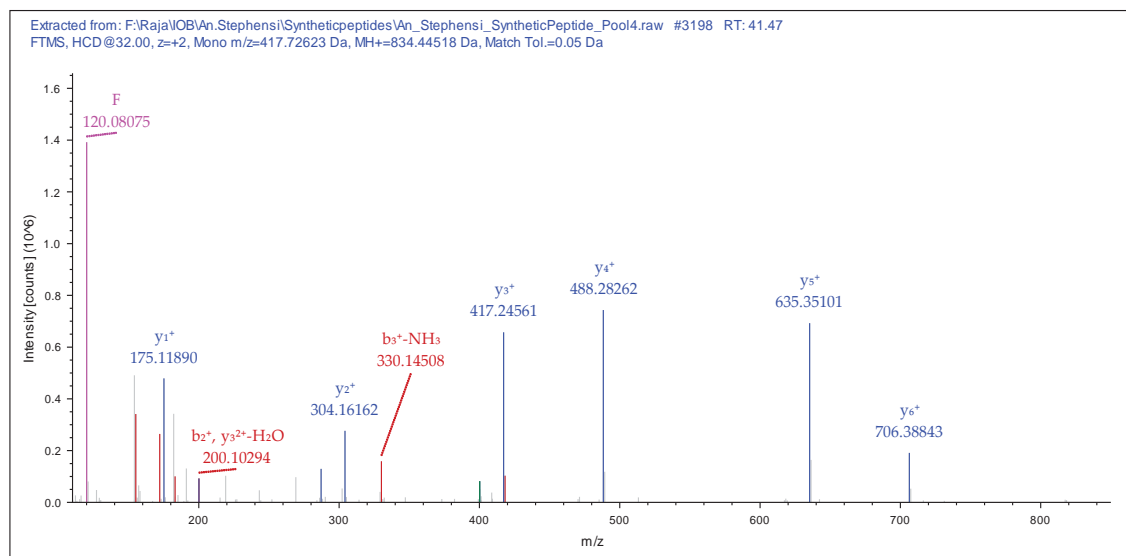

# ALLNLPK

Experiment

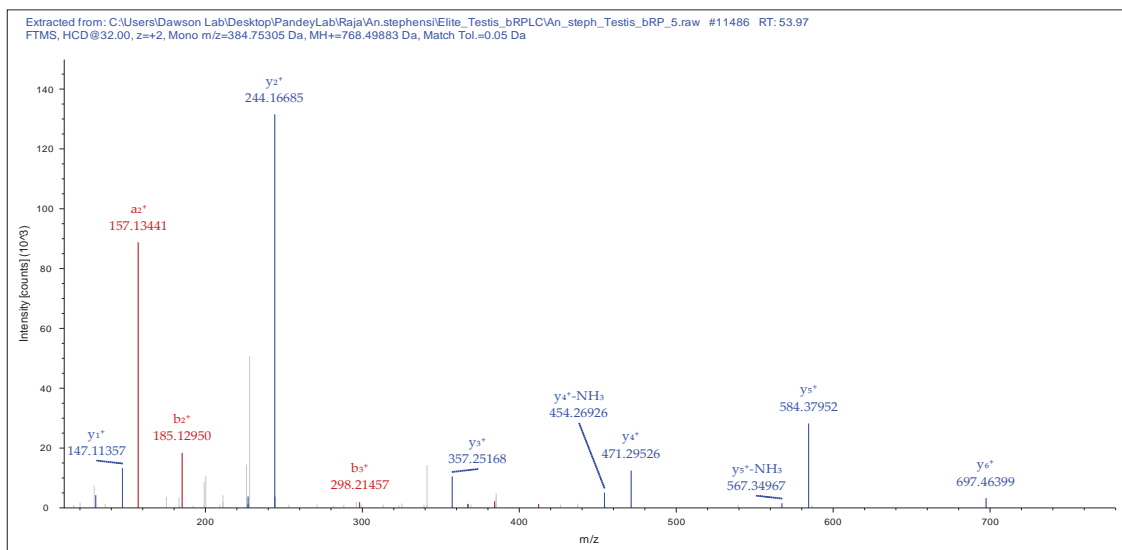

Validated

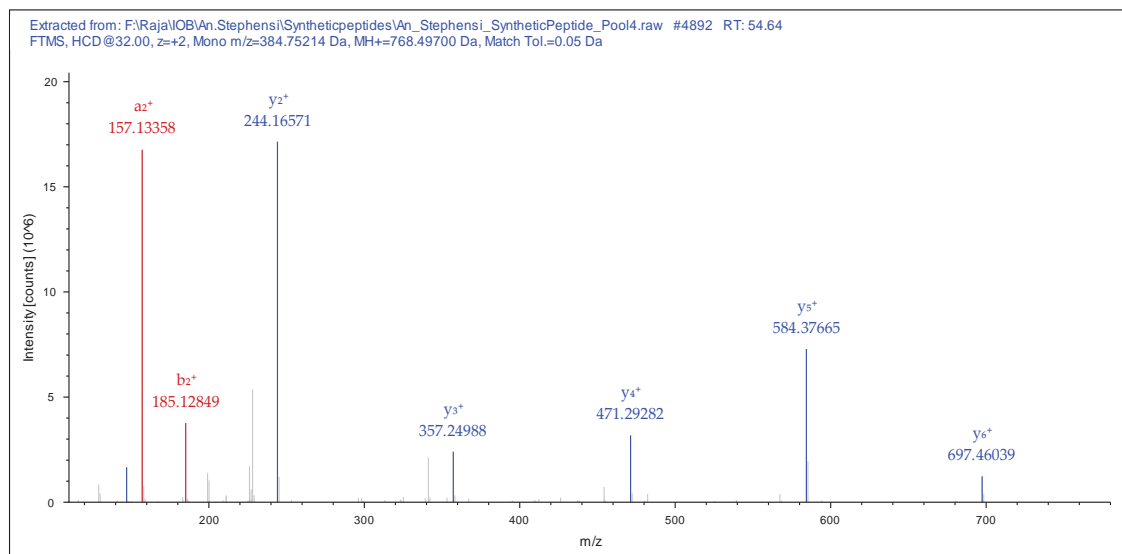



# DLTQEDK

Experiment

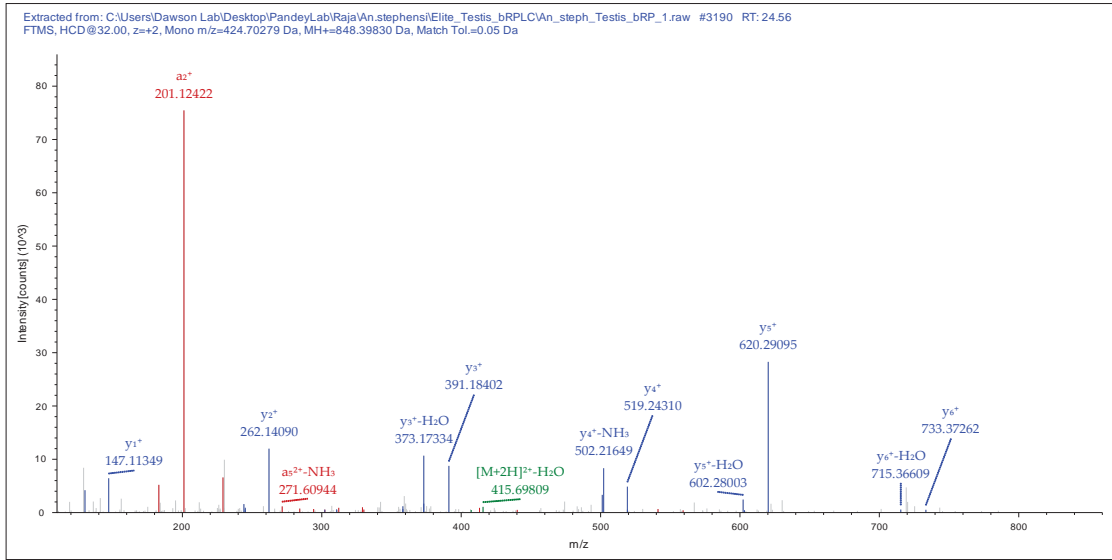

Validated

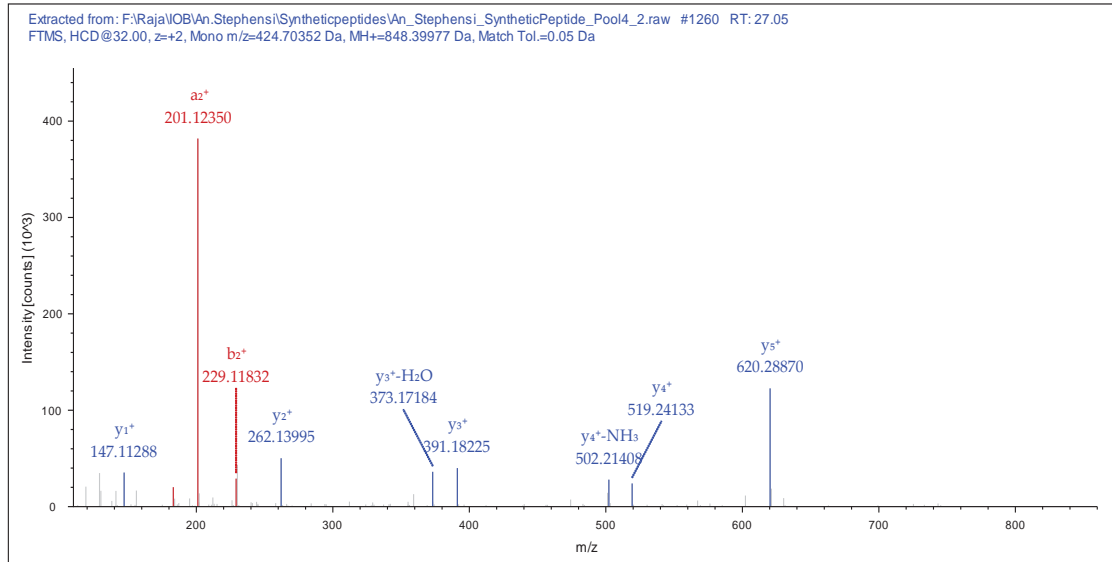

# HISQLIK

Experiment

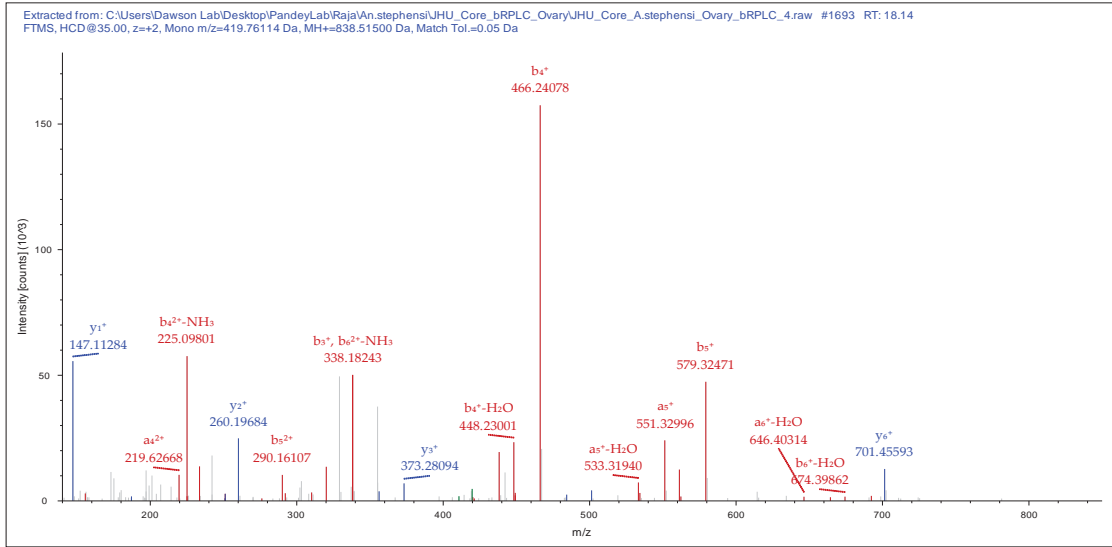

Validated

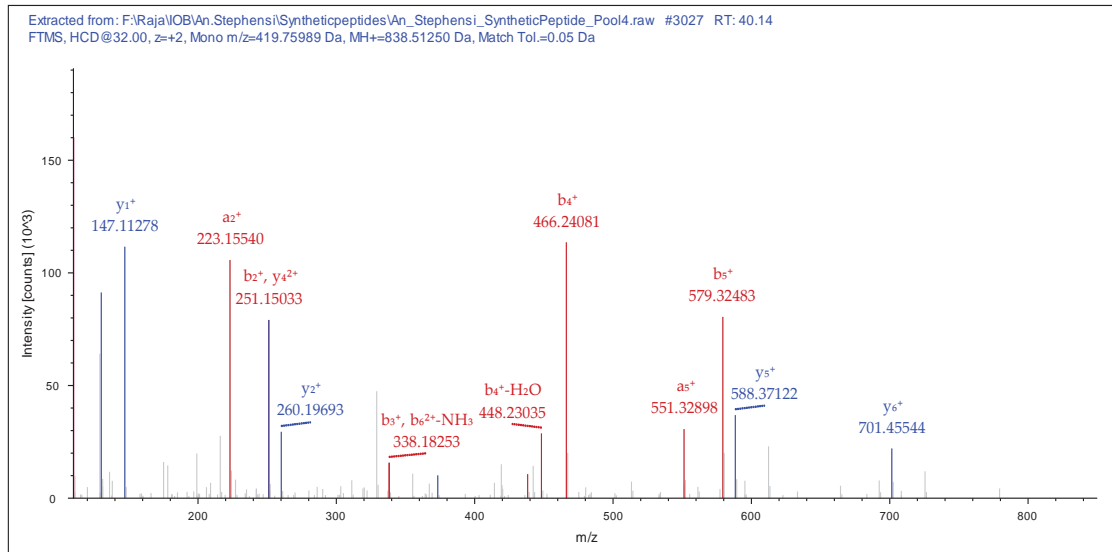

# DYELESR

Experiment

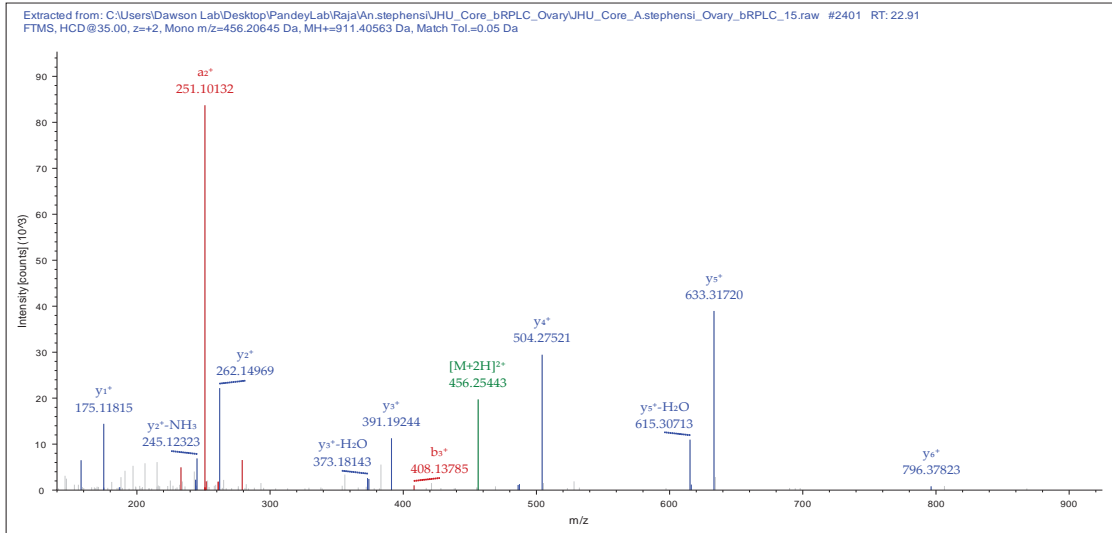

Validated

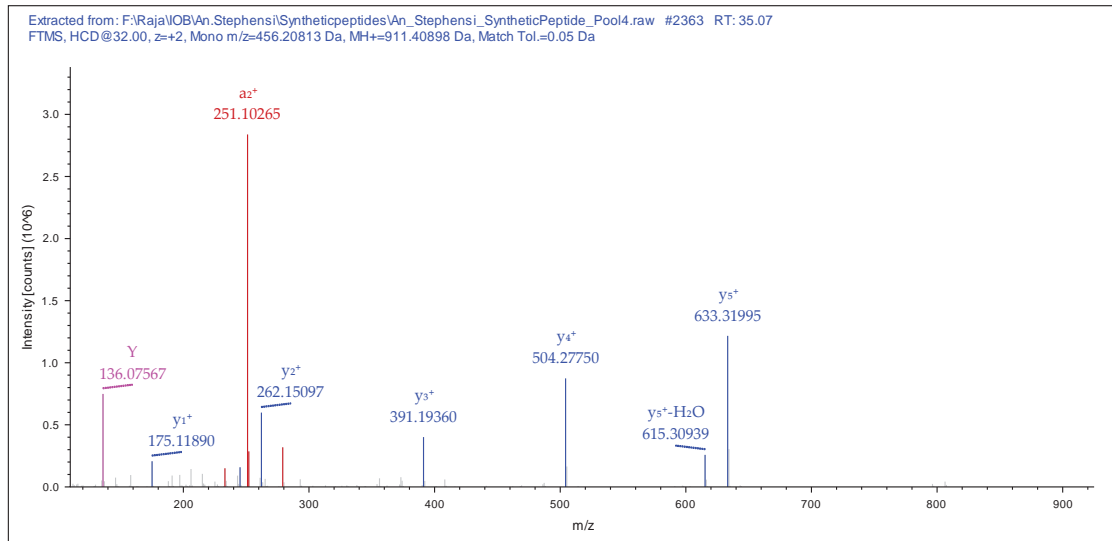

# IVFPEAER

Experiment

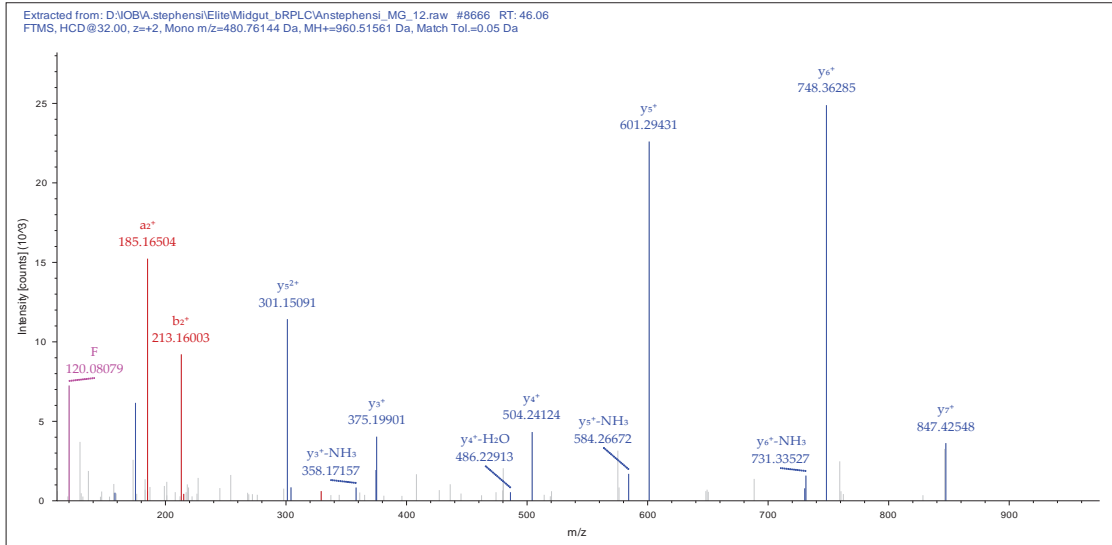

Validated

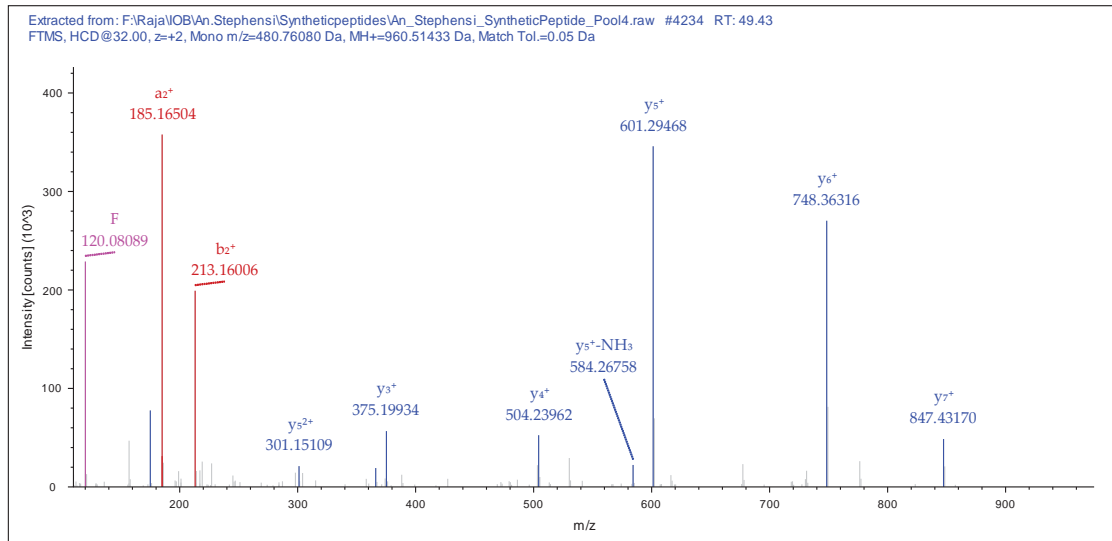

# NEINEMR

Experiment

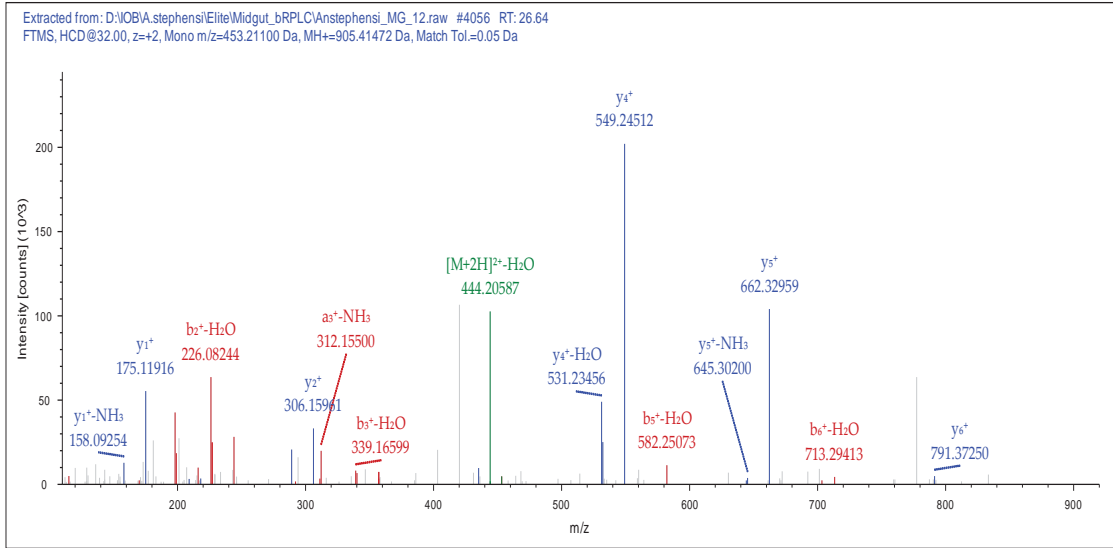

Validated

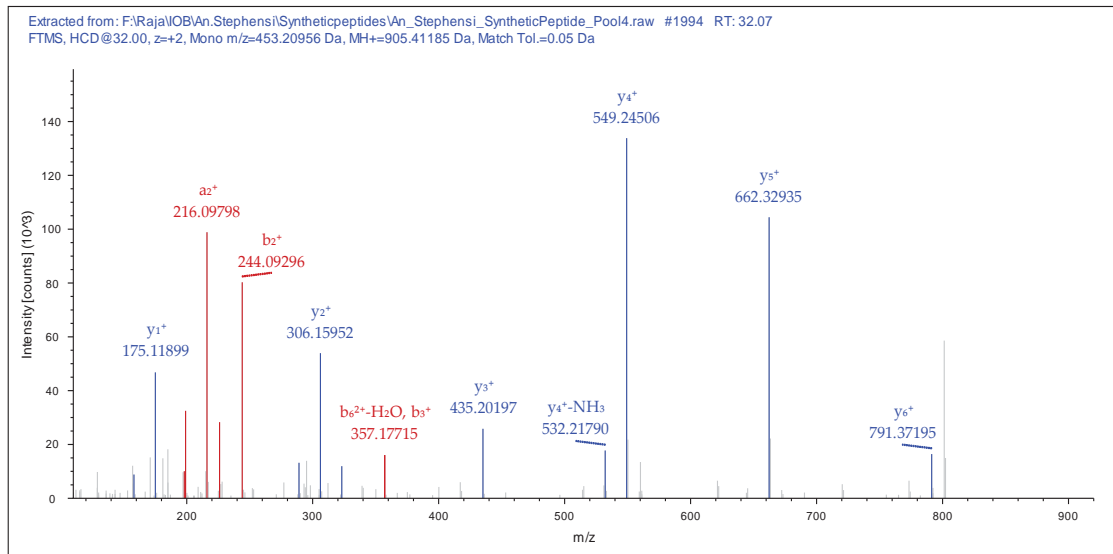

Supplement: supp_gr.201368.115_Supplemental_Information.pdf [file supp_gr.201368.115_Supplemental_Information.pdf]
