# Supplementary material for: Integrating transcriptomic and proteomic data for accurate assembly and annotation of genomes
Source: PubMed Central journal article supplement — Genome Res. 2017 Jan;27(1):133–44. doi: 10.1101/gr.201368.115 (PMC5204337; doi:10.1101/gr.201368.115), 2017-01
Supplement: supp_gr.201368.115_Supplemental_Fig_S1.pdf [file supp_gr.201368.115_Supplemental_Fig_S1.pdf]

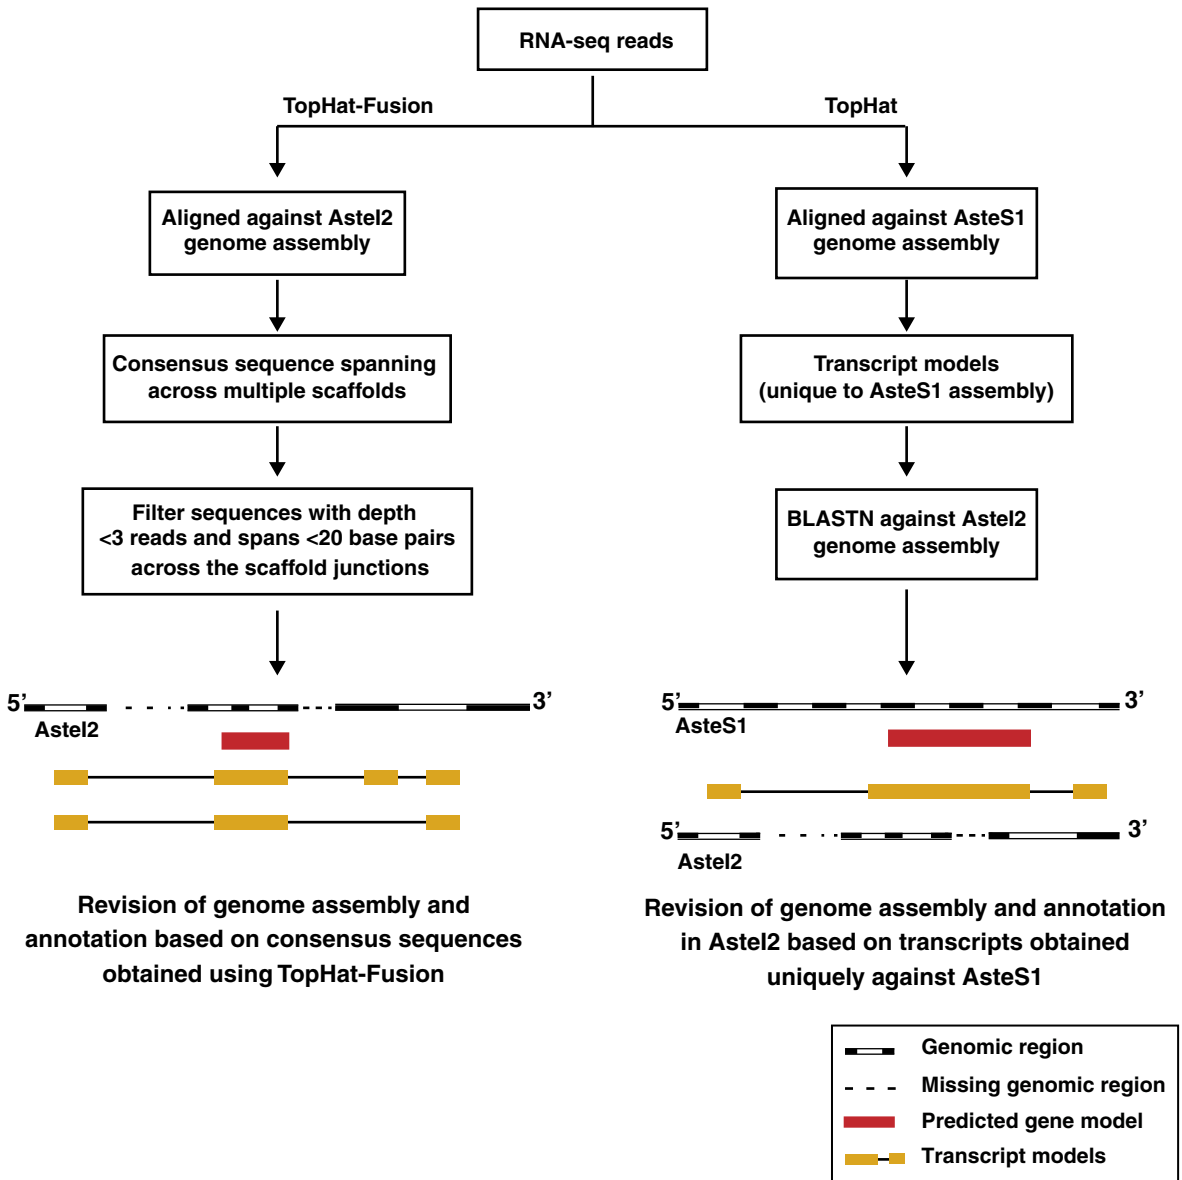

**Supplemental Figure S1.** Improvement in genome annotation and assembly based on RNA-seq data. Transcripts spanning to multiple scaffolds were obtained using two independent approaches, which led to improvement in genome assembly and annotation in Astel2 and AsteS1 genome assemblies.
