# Supplementary material for: Integrating transcriptomic and proteomic data for accurate assembly and annotation of genomes
Source: PubMed Central journal article supplement — Genome Res. 2017 Jan;27(1):133–44. doi: 10.1101/gr.201368.115 (PMC5204337; doi:10.1101/gr.201368.115), 2017-01
Supplement: supp_gr.201368.115_Supplemental_Fig_S2.pdf [file supp_gr.201368.115_Supplemental_Fig_S2.pdf]

## Supplemental Figure S2

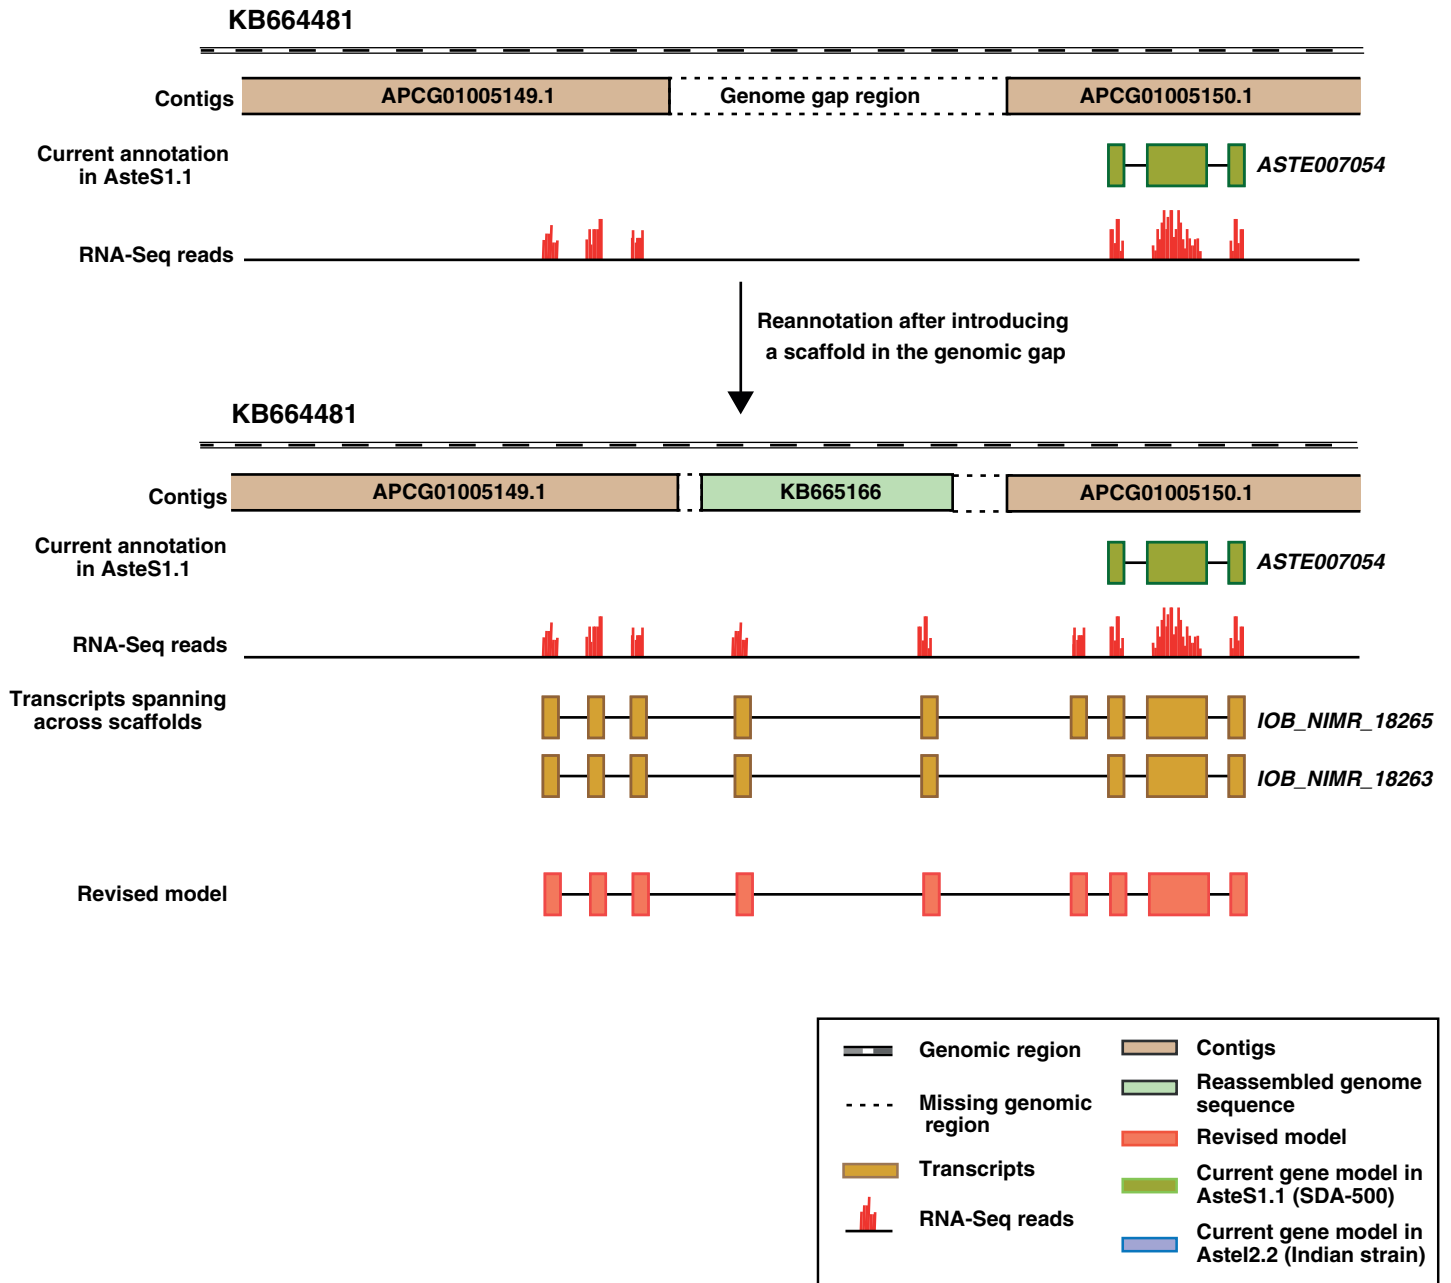

**Supplemental Figure S2.** Genome assembly error in AsteS1 assembly. Transcripts spanning across two different scaffolds provided the evidence for insertion of KB665166 scaffold in a genome gap region in KB664481 scaffold. This led to revision of *ASTE007054* gene.
