# Supplementary material for: Integrating transcriptomic and proteomic data for accurate assembly and annotation of genomes
Source: PubMed Central journal article supplement — Genome Res. 2017 Jan;27(1):133–44. doi: 10.1101/gr.201368.115 (PMC5204337; doi:10.1101/gr.201368.115), 2017-01
Supplement: supp_gr.201368.115_Supplemental_Fig_S3.pdf [file supp_gr.201368.115_Supplemental_Fig_S3.pdf]

A

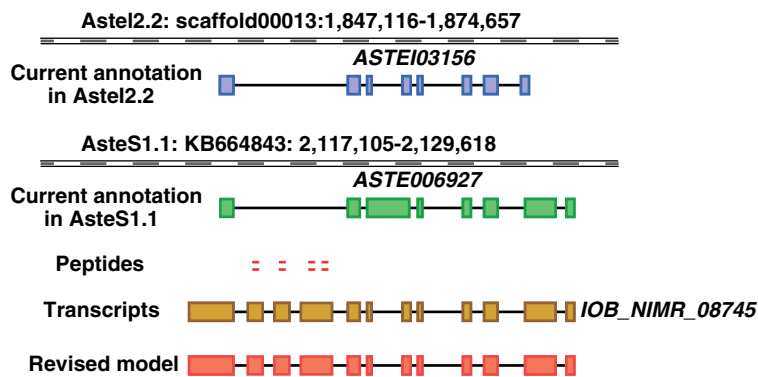

B

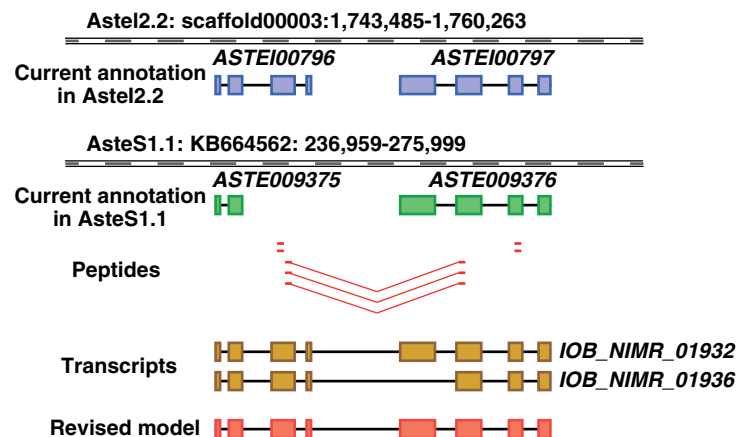

C

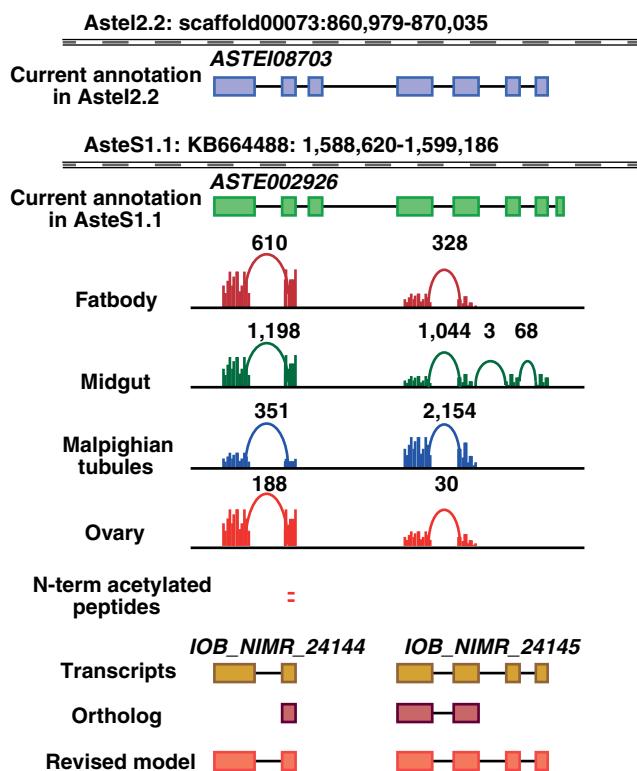

D

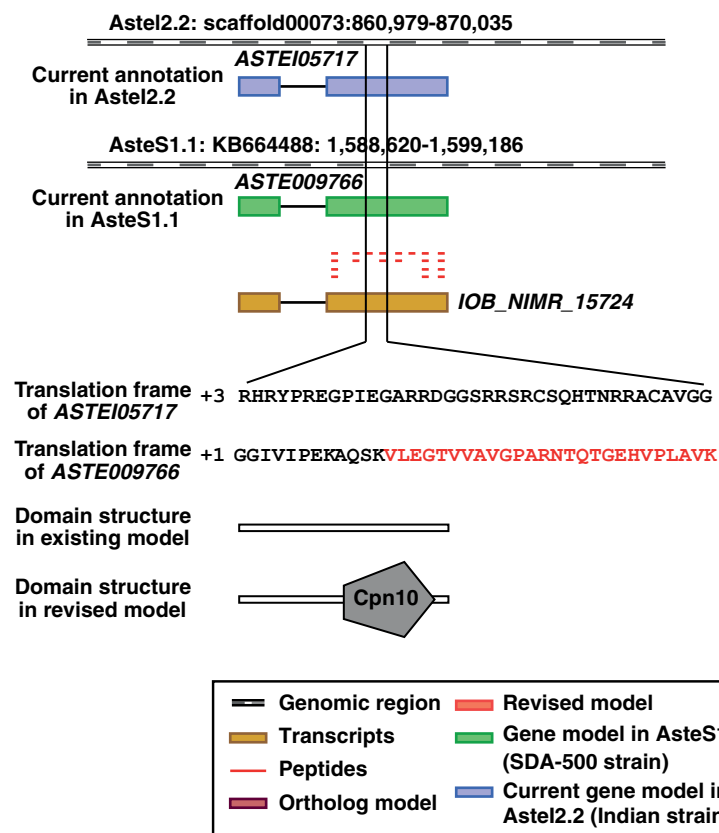

**Supplemental Figure S3** Missed and revised genome annotation in *An. stephensi* Indian strain. **A.** Peptides identified against translated genome provided evidence for novel exons and revision of existing annotation in *Astel2* and *AsteS1* assembly. **B.** RNA-seq data and junctional peptides suggested merging of two adjacent independent genes in one gene. **C.** Split of an annotated gene into two independent genes based on RNA-seq evidence. Presence of an N-terminally acetylated peptide suggested independent start site for the split gene. **D.** Peptides mapping to the exon of *ASTEI05717* gene suggested its translation in alternate frame, which was further supported by translation of *ASTE009766* in SDA-500 strain.
