# Supplementary material for: Integrating transcriptomic and proteomic data for accurate assembly and annotation of genomes
Source: HighWire-hosted journal article supplement (doi:10.1101/gr.201368.115), 2016-11-15
Supplement: Supplemental_Methods.docx [file Supplemental_Methods.docx]

**Supplemental Methods:**

**Library preparation and cluster generation**

The four tissues from the female *Anopheles stephensi* mosquitoes were homogenized and total RNA isolated using the Qiagen miRNeasy kit as per the manufacturer’s instructions. The RNA quality was tested using the Agilent BioAnalyzer 2100 using the RNA nano 6000 chip. About 500 ng total RNA with RIN values between 9 to 10 from each of the four tissues (midgut, Malpighian tubules, ovary and fatbody) was mixed with 1 μl of 1:100 diluted ERCC RNA spike in control mix1 or mix2 (cat. 4456740, 4456739, Life Technologies) and was used for library preparation using the Illumina TruSeq RNA Sample Preparation Kit v3 (Illumina, San Diego, CA). polyA-based mRNA selection and fragmentation of the RNA samples was performed, followed by first and second strand synthesis, end repair, adenylation of 3’ ends, and adapter ligation according to the manufacturer’s instructions. Each library was enriched by 15 cycles of PCR and the library size distribution was validated on the Agilent Bioanalyzer using a DNA 1000 kit. The final library was prepared by extracting the RNA from the gel band excised between 210-500bp with a peak at approximately 286bp. All libraries were quantitated with Qubit 2.0 Fluorometer (Life Technologies, Grand Island, NY) and normalized amounts of each library was loaded on the Illumina TruSeq v3 flow cell in replicates to generate clusters. The clusters were then sequenced on an Illumina HiScanSQ system (Illumina, San Diego, CA).

**RNA-seq data analysis and generation of transcript models**

The raw reads were processed for quality filtration to remove ambiguous bases present due to the sequencing errors at the 3’ end of the reads. Phred-based base quality filter of Q>20 was considered for further analysis. The genome of Anopheles stephensi (Indian strain) was downloaded from “VectorBase” (http://www.vectorbase.org/) and indexed in Bowtie 2 (Version 2.1.0) (Langmead and Salzberg 2012). After filtering, RNA reads were aligned against the An. stephensi (Indian strain) genome using TopHat (Version 2.0.10) (Kim et al. 2013) with the default parameters. TopHat was provided with known genome annotation and Gene Transfer File (GTF), and RABT, i.e. Reference Annotation Based Transcript Assembly option was used. Alignment was carried out separately for each tissue resulting in four different ‘Binary Alignment Map’ (BAM) files. Assembly of transcripts were also performed individually and later combined using Cuffcompare (Trapnell et al. 2012). From the combined set of transcripts, all the transcripts were filtered for (FPKM ≥ 0.1) for proteogenomic analysis.

Identification of novel transcripts were carried out using Cufflinks (Version 2.1.1) (Trapnell et al. 2010; Roberts et al. 2011) with default parameters to determine novel transcripts as a transcript GTF file and all the Cufflinks assemblies were merged using Cuffmerge. Novel isoforms were obtained by comparing the merged Cufflinks assemblies of all the four tissues to the known transcript file from VectorBase using Cuffcompare. The novel isoforms identified using transcriptome analysis were used to extract the sequence using gtf_to_fasta an inbuilt function of TopHat and later translated into three frame using transseq package of EMBOSS (Version 6.6.0.0). The proteomic data obtained from four tissues was searched against the translated three frame database from these novel isoforms using Proteome Discoverer (Version 1.4.1.14).

**Sample preparation for proteomic analysis**

Salivary glands, brain, midgut, fat body, Malpighian tubules, ovary, testes and male accessory glands dissected from adult female *Anopheles stephensi* mosquitoes were lysed by homogenization and sonication in lysis buffer containing 4% SDS, 100 mM DTT, 100 mM Tris, at pH 7.5. The lysate was centrifuged at high speeds to pellet out the cell debris and the supernatant containing the proteins was used for Filter Aided Sample Preparation (FASP) processing and protein estimation using BCA assay. In-gel digestion of proteins was carried out after separation on a 10% polyacrylamide gel. The gel bands containing proteins were excised, destained, reduced, alkylated and then subjected to trypsin digestion using sequencing grade trypsin (Promega) for 12 h at 37ºC. For peptide-based separation, SDS was removed from the lysates by buffer exchange with 9M urea buffer using 30 kDa cut-off filters (Amicon ultra, EMD Millipore). Peptides were reduced and alkylated prior to trypsin digestion using sequencing grade trypsin (1:20, enzyme to substrate concentration). Digested peptides were further cleaned using Sep-Pak C18 columns (Waters Corporation, Milford, MA) and lyophilized. The lyophilized peptides were reconstituted in solvent A (10 mM triethylammonium bicarbonate, pH 8.5) and fractionated on Xbridge C18 5 um 250 x 4.6 mm column (Waters Corporation, Milford, MA, USA) using Agilent 1100 binary pump (Agilent Technologies, Santa Clara, CA, USA) and followed the basic pH reverse-phase liquid chromatography method using a gradient of 5% to 60% solvent B (10 mM triethylammonium bicarbonate, pH 8.5 in 95% Acetonitrile) with 1 ml flow rate per minute for over 60 minutes. A total of 96 fractions were collected using automatic fraction collector, which were further concatenated to 24 or 36 fractions, vacuum dried and stored in -80 ºC freezer until further LC-MS/MS analysis.

**Data acquisition parameters for mass spectrometry**

The peptides from each fraction were reconstituted in 0.1% formic-acid and loaded on to a pre-column (75 µ x 2 cm) packed in-house with magic C18 AQ (Michrom Bioresources, Auburn, CA, USA) 5 µ particle and 100 Å pore size at flow rate of 5 µl per minute. Peptides were resolved at 250 nl/min flow rate using a linear gradient of 10 to 35% solvent B (0.1% formic acid in 95% Acetonitrile) over 75 minutes on an analytical column, of 75 µ x 60 cm, 5 µ particle and 100 Å pore size for Elite and 75 µ x 15 cm, 3 µ particle and 100 Å pore size for Velos was packed using nitrogen pressure cell at 2,500 psi. To reduce the back pressure 60 cm analytical column was operated in a heated insulator at 60 ºC temperature using butterfly column heater (Phoenix S&T, Inc. PA, USA) and was fitted on flex ion source that was operated at 2.5 kV voltage (Only for Elite). Mass spectrometry analysis was carried out in a data dependent manner with a full scan in the range of m/z 350 to 2000. Both MS and MS/MS were acquired and measured using Orbitrap mass analyzer. Full MS scans were measured at a resolution of 120,000 for Elite and 30,000 for Velos at m/z 400 and 70,000 at m/z 200 for Q-Exactive. Fifteen to twenty most intense precursors were selected for MS/MS and were fragmented using higher-energy collisional dissociation (HCD) method and detected at a mass resolution of 30,000 for Elite and 15,000 for Velos at m/z 400 and 17,500 at m/z 200 for Q-Exactive. Automatic gain control for full MS was set to 1 million ions and for MS/MS was set to 0.05 million ions with a maximum ion injection time of 100 and 200 ms respectively. Dynamic exclusion was set to 30 secs and singly charged ions were rejected. Internal calibration was carried out using lock mass option (m/z 445.1200025) from ambient air (Olsen et al. 2005).

**Database creation**

Protein databases for *An. stephensi* Indian strain (Astel2.1) and the SDA500 strain (AsteS1.0) were downloaded from VectorBase and used for the searches to identify the peptides mapping to the annotated proteins. We used a series on in-house scripts to create the three frame and six frame translated databases that were used in the proteogenomic searches. A three frame translated RNA-seq-based transcript database was created using the transcripts assembled from our RNA-seq data and those downloaded from VectorBase (https://www.vectorbase.org/organisms/anopheles-stephensi/indian). Similarly, the 6-frame translated *An. stephensi* genome database was created by translating the genome sequence from stop codon to stop codon for the proteogenomic searches to obtain the genome specific search peptides (GSSPS). Translated peptide sequences smaller than 7 amino acids were not included in any of the database. A hypothetical N-terminal database was created by compiling the peptide sequences starting with methionine and ending with K/R from the transcript sequences. We used the protein database of *An. gambiae* PEST strain (AgamP3.6), downloaded from VectorBase for the identification of ortholog search specific peptides (Figure 1)

**Search parameters used for database searches**

Trypsin was used as the proteolytic enzyme and 2 missed cleavages were allowed for protein database searches. For the translated genome and transcriptome databases, only a single missed cleavage was allowed to reduce the complexity of the database searches. Oxidation of methionine was set as a dynamic modification, while carbamidomethylation of cysteine was set as static modification. Precursor and fragment mass tolerance were set to 10 ppm and 0.05 Da, respectively, for fractions analyzed on Elite and Q-Exactive. On the other hand, fractions analyzed on LTQ-Orbitrap Velos were searched with precursor and fragment mass tolerance set to 20 ppm and 0.1 Da, respectively. The protein and peptide data were extracted using top one peptide rank and high peptide confidence filters. The false discovery rate (FDR) was calculated by enabling the peptide sequence analysis using a decoy database and a cut-off of 1% peptide level FDR was used for identifications.

**Spectral count-based quantitation**

Spectral counts per gene per experiment (e.g. SDS-PAGE) were calculated from all peptides mapped to each gene across tissues. Total acquired tandem mass spectra were used to normalize between experiments and then spectral counts per gene were averaged across multiple experiments (e.g. SDS-PAGE and bRPLC fractionation) per tissue (e.g. midgut). The normalized spectral counts per gene per sample were used to plot the heat map for genes identified.

**Details of proteogenomic analysis**

We mapped the genome search-specific peptides back to the *An. stephensi* genome to identify the probable coding regions in the genome. Peptides mapping to multiple locations in the genome were not considered for further analysis. The peptides, which mapped to the translated transcript sequences and/or *An. gambiae* proteins were classified as intra-exonic, intronic and exon-exon junctional peptides. The intra-exonic and intronic peptides were used to confirm the coding potential of the respective regions, whereas the junctional peptides provided evidence for the presence of alternate splice forms of a transcript. The coding potential of a given genomic region was confirmed by the presence of transcript evidence and/or ortholog evidence (using *An. gambiae* proteins). Evolutionary analysis for the novel protein sequences was carried out using OrthoDB API (version 8) against Anopheline genomes and their conservation rates were then compared with the known proteins in *An. stephensi* Indian strain.

**Pipeline for identification of genome sequencing and assembly errors in *An. stephensi* Indian strain**

Genome sequencing errors were identified using manual analysis of peptides which mapped to alternate frames of translation of existing annotations. RNA-seq data provided evidence of insertion or deletion of nucleotides in the corresponding genomic region, resulting in translation frame-shift. The alternate translation was supported by orthologous proteins as well. Probable refinements in genome assembly of *An. stephensi* (Indian strain) genome were identified using RNA-seq-based transcriptomic and high resolution mass spectrometry-based proteomic data (as described in Figure 2G). Transcriptomic data was subjected to alignment with reference genome of *An. stephensi* (Indian strain) with a maximum of 4 mismatches using TopHat2 (version v2.0.11). TopHat-Fusion, an attribute of TopHat2 that can be implemented with ‘--fusion-search’ option was used to identify transcripts spanning two or more scaffolds. 200bp transcripts were created based on the reads aligned to about 100 bases towards the end of one scaffold and 100 bases in the beginning of the other scaffold, using this approach. Transcripts spanning across scaffolds with a minimum of 10 bases spanning across the fusion point and supported by at least 3 reads were considered for identifying true scaffold rearrangement. Since fusion search in TopHat, by default allows the alignment of the transcripts to two regions of the genome, a nucleotide BLAST was performed of these transcripts spanning across scaffolds (200 base sequences) against the transcripts of *An. stephensi* (Indian strain) to discard the ones that map entirely (80% and above identity) within a scaffold (splice junctions). The remaining transcripts were then used for nucleotide BLAST against SDA-500 transcripts to identify those that map to a single scaffold in SDA-500. BLAST results were parsed for an identity of 80% and above.

At the peptide level, peptides uniquely identified against *An. gambiae* proteins were analyzed to identify missing genomic region in *An. stephensi* Indian strain. Corresponding ortholog proteins were manually mapped against the *An. stephensi* genome, upon which, we identified gaps/unsequenced regions in the *An. stephensi* genome scaffolds. In certain cases, the orthologous proteins mapped partly to a larger scaffold, while the other part mapped to another smaller scaffold showing the probability of inserting the smaller scaffold into the parent scaffold. These orthologous proteins were supported by transcript evidence from our transcriptome data, further confirming the assembly refinements.

**References**

Langmead B, Salzberg SL. 2012. Fast gapped-read alignment with Bowtie 2. *Nat Methods* **9**: 357-359.

Kim D, Pertea G, Trapnell C, Pimentel H, Kelley R, Salzberg SL. 2013. TopHat2: accurate alignment of transcriptomes in the presence of insertions, deletions and gene fusions. *Genome Biol* **14**: R36. doi: 10.1186/gb-2013-14-4-r36.

Trapnell C, Roberts A, Goff L, Pertea G, Kim D, Kelley DR, Pimentel H, Salzberg SL, Rinn JL, Pachter L. 2012. Differential gene and transcript expression analysis of RNA-seq experiments with TopHat and Cufflinks. *Nat Protoc* **7**: 562-578.

Trapnell C, Williams BA, Pertea G, Mortazavi A, Kwan G, van Baren MJ, Salzberg SL, Wold BJ, Pachter L. 2010. Transcript assembly and quantification by RNA-Seq reveals unannotated transcripts and isoform switching during cell differentiation. *Nat Biotechnol* **28**: 511-515.

Roberts A, Pimentel H, Trapnell C, Pachter L. 2011. Identification of novel transcripts in annotated genomes using RNA-Seq. *Bioinformatics* **27**: 2325-2329.

Olsen JV, de Godoy LM, Li G, Macek B, Mortensen P, Pesch R, Makarov A, Lange O, Horning S, Mann M. 2005. Parts per million mass accuracy on an Orbitrap mass spectrometer via lock mass injection into a C-trap. *Mol Cell Proteomics* **4**(12): 2010-2021.
