# Supplementary material for: Integrating transcriptomic and proteomic data for accurate assembly and annotation of genomes
Source: HighWire-hosted journal article supplement (doi:10.1101/gr.201368.115), 2016-11-15
Supplement: Supplemental_Table_S1.xlsx [file Supplemental_Table_S1.xlsx]

## Sheet: Prasad_etal_SupplTable_S1_Prote
Supplemental Table S1 - Summary of peptides and proteins identified against Indian strain
Prasad et al., 2016. Integrating transcriptomic and proteomic data for accurate assembly and annotation of genomes
Accession	Coverage	# Unique Peptides	#Peptides	#PSMs	# AAs	MW [kDa]	calc. pI	Tissues	Sequence	Modifications	Protein Group Accessions	#PSMs	m/z[Da]	Mass[Da]	Charge	XCorr	IonScore	dMass[ppm]	# Missed Cleavages
ASTEI02330-PA	10.07	7	7	9	1043	116.506	8.81	Midgut
									AYISTATK		ASTEI02330-PA	1	427.734	854.461	2	1.71	39.42	-1.347	0
									NDLDDGLETATEYTER		ASTEI02330-PA	1	921.405	1841.8	2	3.81	135.66	-0.594	0
									TIAAQEAMK		ASTEI02330-PA	2	481.753	962.499	2	1.87	61.07	1.781	0
									AVYIPMSDTPPK		ASTEI02330-PA	1	659.837	1318.67	2	2.06	54.41	-2.886	0
									LVPIPYDVNcR	C10(Carbamidomethyl)	ASTEI02330-PA	2	673.35	1345.69	2	1.79	50.15	0.144	0
									ASELESDFEYR		ASTEI02330-PA	1	673.299	1345.59	2	2.8	93.7	-0.239	0
ASTEI07414-PA	85.63	50	50	2451	515	56.68	7.53	Midgut,Brain,Salivary glands,Thorax,Proboscis,Male accessory glands,Antennae,Fatbody,Larvae,Ovary,Pupae,Malpighian tubules,Other,Heamolymph,Legs,Head,Maxillary palps,Testis
									IYDEFVER		ASTEI07414-PA	76	535.764	1070.52	2	2.1	46.56	4.3	0
									TTLELGGKSPNIILSDADMK		ASTEI07414-PA	2	1052.05	2103.1	2	5.39	112.85	-0.195	1
									vAFTGSTEVGk	N-Term(iTRAQ4plex); K11(iTRAQ4plex)	ASTEI07414-PA	1	692.39	1383.77	2	3.29	48.99	0.718	0
									VYLASLETLDNGKPYFmSYNVDVPMAISNLR	M17(Oxidation)	ASTEI07414-PA	2	1179.59	3536.75	3	3.44	46.56	0.888	0
									DAFKLGSPWRR		ASTEI07414-PA	2	444.91	1332.72	3	2.7	23.57	-0.621	2
									RTVGNPFDLTTEHGPQVDRDQFDK		ASTEI07414-PA	1	693.84	2772.34	4	6.14	28.06	1.027	2
									HEPVGVcGQIIPWNFPILmAAWK	C7(Carbamidomethyl); M19(Oxidation)	ASTEI07414-PA	3	893.794	2679.37	3	3.12	33.81	3.762	0
									LADLmER	M5(Oxidation)	ASTEI07414-PA	6	432.221	863.435	2		23.53	6.361	0
									EEIFGPVQQLIR		ASTEI07414-PA	72	714.9	1428.79	2	2.5	46.75	5.712	0
									YYAGWADK		ASTEI07414-PA	1	487.224	973.442	2	1.71	25.51	0.086	0
									IQQGSGLSNLKR		ASTEI07414-PA	48	434.25	1300.73	3	2.53	31.64	0.718	1
									SVITRIPVKNS		ASTEI07414-PA	17	607.367	1213.73	2		20.31	0.414	2
									VIPmDGEFFVYTR	M4(Oxidation)	ASTEI07414-PA	62	795.387	1589.77	2	3.46	48.64	-0.091	0
									VQDLPGYFIQPTVFADVQDDMTIAK		ASTEI07414-PA	18	937.798	2811.38	3	2.26	34.37	-3.714	0
									VAFTGSTEVGK		ASTEI07414-PA	55	548.287	1095.57	2	2.26	28.83	-1.856	0
									iQQGSGLSNLkR	N-Term(iTRAQ4plex); K11(iTRAQ4plex)	ASTEI07414-PA	2	530.317	1588.94	3	2.41	10.31	0.265	1
									lADLmER	N-Term(iTRAQ4plex); M5(Oxidation)	ASTEI07414-PA	1	504.27	1007.53	2	2.32	24.26	0.654	0
									VQDLPGYFIQPTVFADVQDDmTIAK	M21(Oxidation)	ASTEI07414-PA	5	943.132	2827.38	3	1.5	15.96	-1.787	0
									eEIFGPVQQLIR	N-Term(iTRAQ4plex)	ASTEI07414-PA	1	786.95	1572.89	2	2.44	40.61	4.017	0
									tVGNPFDLTTEHGPQVDR	N-Term(iTRAQ4plex)	ASTEI07414-PA	5	709.691	2127.06	3	6.3	55.57	-0.279	0
									sSPEILYTGIFINNEWHk	N-Term(iTRAQ4plex); K18(iTRAQ4plex)	ASTEI07414-PA	3	812.766	2436.28	3	7.59	69.56	0.785	0
									TFPTINPSNEQVIAEIQQGSKADIDQAVVAAR		ASTEI07414-PA	10	1137.59	3410.76	3	3.84	44.43	1.008	1
									SLDEVIERANK		ASTEI07414-PA	1	637.341	1273.67	2	3.31	39.48	0.582	1
									LADLMER		ASTEI07414-PA	17	424.221	847.434	2	1.74	46.29	0.193	0
									DIDKVNYLVQGLRAGTVWVNTYNVLSAQAPFGGYK		ASTEI07414-PA	1	965.013	3857.03	4	6.57	29.37	6.864	2
									ENGEYGLQAYTEVK		ASTEI07414-PA	102	800.878	1600.75	2	4.4	70	0.431	0
									lADLMER	N-Term(iTRAQ4plex)	ASTEI07414-PA	2	496.272	991.536	2	2.64	34.44	0.091	0
									FKSLDEVIER		ASTEI07414-PA	9	412.559	1235.66	3	3.72	48.57	-1.582	1
									TVGNPFDLTTEHGPQVDRDQFDKILGLIDTGK		ASTEI07414-PA	22	882.451	3526.78	4	2.86		0.615	2
									vNYLVQGLR	N-Term(iTRAQ4plex)	ASTEI07414-PA	4	603.361	1205.72	2	3.21	38.03	2.753	0
									YYAGWADKNHGK		ASTEI07414-PA	12	705.334	1409.66	2	3.27	65.3	1.215	1
									SPNIILSDADmK	M11(Oxidation)	ASTEI07414-PA	36	660.329	1319.65	2	1.49	20.14	-0.96	0
									SVITRIPVK		ASTEI07414-PA	8	506.829	1012.65	2	2.21	46.39	-0.338	1
									tFIEDkIYDEFVER	N-Term(iTRAQ4plex); K6(iTRAQ4plex)	ASTEI07414-PA	4	698.034	2092.09	3	2.93	12.59	1.742	1
									sPNIILSDADMk	N-Term(iTRAQ4plex); K12(iTRAQ4plex)	ASTEI07414-PA	2	796.434	1591.86	2	4.65	78	0.366	0
									VYLASLETLDNGKPYFMSYNVDVPmAISNLR	M25(Oxidation)	ASTEI07414-PA	6	1179.58	3536.74	3	1.01		-2.115	0
									KIQQGSGLSNLKR		ASTEI07414-PA	7	476.948	1428.83	3	6.37	58.48	0.611	2
									iYDEFVER	N-Term(iTRAQ4plex)	ASTEI07414-PA	5	607.814	1214.62	2	3.11	33.59	2.574	0
									VYLASLETLDNGKPYFmSYNVDVPmAISNLR	M17(Oxidation); M25(Oxidation)	ASTEI07414-PA	2	1184.92	3552.73	3	3.84	30.27	-1.464	0
									eNGEYGLQAYTEVk	N-Term(iTRAQ4plex); K14(iTRAQ4plex)	ASTEI07414-PA	2	944.98	1888.95	2	5.05	72.06	-0.035	0
									SSPEILYTGIFINNEWHK		ASTEI07414-PA	76	1074.54	2148.07	2	3.58	76.16	-1.309	0
									SPNIILSDADMK		ASTEI07414-PA	51	652.332	1303.66	2	4.19	67.22	0.559	0
									HEPVGVcGQIIPWNFPILMAAWK	C7(Carbamidomethyl)	ASTEI07414-PA	8	888.461	2663.37	3	3.94	31.21	1.898	0
									KIQQGSGLSNLK		ASTEI07414-PA	5	424.914	1272.73	3	4.24	40.87	-0.357	1
									IQQGSGLSNLK		ASTEI07414-PA	27	572.823	1144.64	2	3.01	34.85	5.027	0
									VIPMDGEFFVYTR		ASTEI07414-PA	61	787.391	1573.78	2	2.57	51.32	1.874	0
									VYLASLETLDNGKPYFMSYNVDVPMAISNLR		ASTEI07414-PA	11	1174.26	3520.75	3	2.07	19.45	1.494	0
									TVGNPFDLTTEHGPQVDR		ASTEI07414-PA	15	661.658	1982.96	3	3.92	35.92	1.584	0
									sLDEVIER	N-Term(iTRAQ4plex)	ASTEI07414-PA	3	552.805	1104.6	2	3.28	39.15	0.744	0
									SLDEVIER		ASTEI07414-PA	59	480.755	960.503	2	2.35	46.6	3.474	0
									iQQGSGLSNLk	N-Term(iTRAQ4plex); K11(iTRAQ4plex)	ASTEI07414-PA	3	716.922	1432.84	2	4.7	75.47	-0.261	0
									DAFKLGSPWR		ASTEI07414-PA	2	588.812	1176.62	2	2.35	29.83	0.151	1
									TFIEDKIYDEFVER		ASTEI07414-PA	70	601.963	1803.88	3	3.75	58.52	-2.466	1
									sPNIILSDADmk	N-Term(iTRAQ4plex); M11(Oxidation); K12(iTRAQ4plex)	ASTEI07414-PA	4	804.432	1607.86	2	3.27	47.4	0.64	0
									VNYLVQGLR		ASTEI07414-PA	21	531.309	1061.61	2	2.67	43.47	1.184	0
									dQFDkILGLIDTGk	N-Term(iTRAQ4plex); K5(iTRAQ4plex); K14(iTRAQ4plex)	ASTEI07414-PA	1	665.722	1995.15	3	5.04	52.45	1.986	1
ASTEI03895-PA	29.42	19	19	52	894	99.428	6.1	Midgut,Brain,Salivary glands,Ovary,Fatbody,Testis
									LPLQTIMR		ASTEI03895-PA	2	486.289	971.57	2	1.14	45.45	-0.226	0
									AIVQLTSK		ASTEI03895-PA	2	430.266	859.525	2	1.85	36.25	-0.017	0
									ESDSASERDDGPR		ASTEI03895-PA	1	474.202	1420.59	3	2.54	44.89	-0.48	1
									FLQHGTLVGLLPVPHPILIR		ASTEI03895-PA	2	555.84	2220.34	4	4.61	18.59	0.766	0
									WIVHFTSADNR		ASTEI03895-PA	3	449.226	1345.66	3	0.59	20.21	-0.168	0
									LFEIQRV		ASTEI03895-PA	1	452.766	904.526	2	1.72	27.92	0.485	1
									QVFHALANLPTDAAGIAR		ASTEI03895-PA	2	622.34	1865.01	3	2.77	62.26	1.212	0
									LLNNPLVQSYLPNSTK		ASTEI03895-PA	6	900.999	1800.99	2	1.69	75.82	3.004	0
									LAISDEEEAEGAK		ASTEI03895-PA	1	681.326	1361.65	2	3.89	86.75	1.758	0
									LLQVLVPQVEK		ASTEI03895-PA	8	633.395	1265.78	2	3.06	11.96	-0.617	0
									ESAHPSDLASPSSPDLPAGVPEK		ASTEI03895-PA	1	763.373	2288.11	3	3.59	32.27	0.324	0
									DVMPTNLATLcYK	C11(Carbamidomethyl)	ASTEI03895-PA	1	763.372	1525.74	2	3.29	64.02	-1.384	0
									SSDVLDILVPILYHLNDSR		ASTEI03895-PA	1	723.725	2169.16	3	3.94	19.67	2.942	0
									ILPYVFEDVQWK		ASTEI03895-PA	3	768.909	1536.81	2	3.18	51.79	0.708	0
									IHRDDDFQFILK		ASTEI03895-PA	2	516.271	1546.8	3	1.36		-1.274	1
									LLLTcFSETMYRPPTASDEPNR	C5(Carbamidomethyl)	ASTEI03895-PA	1	866.756	2598.25	3	4.01	37.96	7.997	0
ASTEI10359-PA	24.55	22	22	314	1654	171.215	8	Midgut,Brain,Salivary glands,Proboscis,Antennae,Fatbody,Ovary,Malpighian tubules,Male accessory glands,Legs,Head,Maxillary palps,Testis
									SQAAAQK		ASTEI10359-PA	1	352.191	703.375	2	1.2	31.22	2.745	0
									AKQPTAEQIR		ASTEI10359-PA	2	381.214	1141.63	3	3.63	62.94	-4.653	1
									DGDDGGDWDTVGPASGGGSGVQLGGINVDLK		ASTEI10359-PA	3	972.448	2915.33	3	1		-0.274	0
									NHVAINK		ASTEI10359-PA	1	398.227	795.448	2	2.06	26.83	0.46	0
									ENLAKDEGQNQSQQYPK		ASTEI10359-PA	1	659.65	1976.93	3	3.19	44.88	1.693	1
									IAQITDIK		ASTEI10359-PA	6	451.271	901.534	2	2.83	48.87	-1.111	0
									DANLGSVAYSTMSDGR		ASTEI10359-PA	5	822.37	1643.73	2	3.71	100.79	-0.28	0
									SDPYGQSASTNTALTGGYQNAPYSSTQTNK		ASTEI10359-PA	4	1037.14	3109.4	3	2.94	61.61	-0.123	0
									IQSLmETTQR	M5(Oxidation)	ASTEI10359-PA	7	611.808	1222.61	2	2.91	62.96	-0.699	0
									gGEGGGYR	N-Term(iTRAQ4plex)	ASTEI10359-PA	1	448.721	896.435	2		32.24	0.633	0
									DEGQNQSQQYPK		ASTEI10359-PA	4	711.316	1421.63	2	2.22	51.09	-2.492	0
									DANLGSVAYSTmSDGR	M12(Oxidation)	ASTEI10359-PA	2	830.369	1659.73	2	4.75	57.58	1.389	0
									DTELVQQYSTTVVSSTATAAVAAGGGGAATGVAGVVPQYSDLHAGTPNATTAAQHLR		ASTEI10359-PA	1	1374.94	5496.73	4	2.05	12.96	1.576	0
									LPHVPGFYDINYQTPTSLGAAGVR		ASTEI10359-PA	41	858.445	2573.32	3	7.43	66.04	2.42	0
									iAQITDIk	N-Term(iTRAQ4plex); K8(iTRAQ4plex)	ASTEI10359-PA	1	595.373	1189.74	2	2.95		-0.452	0
									IQSLMETTQR		ASTEI10359-PA	9	603.811	1206.61	2	2.95	58.33	-0.673	0
									NNATGSVSTSVSAGVNSMSNAAAALDQLTK		ASTEI10359-PA	1	956.133	2866.39	3	2.04	12.1	0.241	0
									GQTVANPQSGSGSGSDMAPSMYGK		ASTEI10359-PA	1	1157.5	2313.99	2	4.98	95.96	-5.458	0
									eTGGSGGGGNAAGTNNEk	N-Term(iTRAQ4plex); K18(iTRAQ4plex)	ASTEI10359-PA	1	622.633	1865.88	3	3.83	62.01	0.359	0
									QPTAEQIR		ASTEI10359-PA	1	471.752	942.496	2	2.47	63.67	-4.866	0
									SEEEVccALQEcDSDLDR	C6(Carbamidomethyl); C7(Carbamidomethyl); C12(Carbamidomethyl)	ASTEI10359-PA	7	1107.93	2214.86	2	4.87	128.27	1.301	0
ASTEI03214-PA	37.5	7	7	59	128	15.081	7.61	Midgut,Thorax,Salivary glands,Brain,Proboscis,Male accessory glands,Antennae,Fatbody,Ovary,Legs,Maxillary palps
									kYPDRVPVIVEk	N-Term(iTRAQ4plex); K1(iTRAQ4plex); K12(iTRAQ4plex)	ASTEI03214-PA	1	625.72	1875.14	3	2.02		0.665	2
									mKFQYKEEHPFEK	M1(Oxidation)	ASTEI03214-PA	2	586.291	1756.86	3	5.84	40.63	13.313	2
									fQYkEEHPFEk	N-Term(iTRAQ4plex); K4(iTRAQ4plex); K11(iTRAQ4plex)	ASTEI03214-PA	3	638.677	1914.02	3	4.21	18.36	2.227	1
									FQYKEEHPFEK		ASTEI03214-PA	10	371.186	1481.72	4	2.89	12.2	10.925	1
									VPVIVEK		ASTEI03214-PA	10	392.252	783.497	2	1.93	47.85	-0.035	0
									KYPDRVPVIVEK		ASTEI03214-PA	12	481.618	1442.84	3	2.78	22.17	2.349	2
									YPDRVPVIVEK		ASTEI03214-PA	1	438.921	1314.75	3	3.82	27.11	6.175	1
									KYLVPSDLTVGQFYFLIR		ASTEI03214-PA	4	720.401	2159.19	3	1.47		-1.317	1
									MKFQYKEEHPFEK		ASTEI03214-PA	2	870.929	1740.85	2	2.07		5.403	2
									YLVPSDLTVGQFYFLIR		ASTEI03214-PA	14	1016.05	2031.1	2	1.74	20.81	-0.132	0
ASTEI04687-PA	16.43	3	3	15	207	23.72	5.3	Midgut,Salivary glands,Ovary,Fatbody,Malpighian tubules,Testis
									NTNFADVQALAR		ASTEI04687-PA	7	660.338	1319.67	2	3.59	36.34	-1.546	0
									aAVAEFNSWLSSK	N-Term(Acetyl)	ASTEI04687-PA	7	726.362	1451.72	2		22.43	0.178	0
									LDVEVQLAK		ASTEI04687-PA	1	507.795	1014.58	2	2.83	62.41	-0.528	0
ASTEI063440-PA	9.72	6	6	15	772	88.083	6.42	Brain,Midgut,Fatbody,Malpighian tubules,Salivary glands,Maxillary palps,Testis
									SFEPILGLIR		ASTEI063440-PA	4	572.84	1144.67	2	2.36	42.81	0.001	0
									TPIDFQLLLPR		ASTEI063440-PA	4	656.884	1312.76	2	4.09	81.39	-1.607	0
									LLANLVENLPNLR		ASTEI063440-PA	4	739.94	1478.87	2	3.23	78.1	2.596	0
									MVEAIER		ASTEI063440-PA	1	424.22	847.434	2	1.79	34.56	-0.815	0
ASTEI00115-PA	13.58	3	3	14	265	31.009	6.65	Brain,Male accessory glands,Ovary,Pupae,Legs,Testis
									GKPPPPTAPSSSPPAVTESK		ASTEI00115-PA	1	644.677	1932.02	3	3.72	34.18	4.79	0
									LATEEEAYR		ASTEI00115-PA	1	541.262	1081.52	2	2.1	46.18	1.099	0
ASTEI06215-PA	2.25	2	2	5	712	79.955	6.37	Brain,Larvae
									QLYAEQLER		ASTEI06215-PA	4	575.299	1149.59	2	1.48	10.08	1.266	0
ASTEI03438-PA	14.42	7	7	13	756	83.611	9.48	Midgut,Thorax,Fatbody,Testis
									EALQELYDDcTR	C10(Carbamidomethyl)	ASTEI03438-PA	1	756.837	1512.67	2	3.96	68.65	1.819	0
									TVDLIFSAVNDYKR		ASTEI03438-PA	1	547.626	1640.86	3	4.05		0.1	1
									NKTEVYVSNIIEETVESTGR		ASTEI03438-PA	1	756.717	2268.14	3	5.88	42.36	0.157	1
									SLSELSNVILALVQR		ASTEI03438-PA	5	821.482	1641.96	2	4.56	84.7	1.379	0
ASTEI055271-PA	2.33	1	1	1	301	34.955	6.8	Malpighian tubules
									LILYFLR		ASTEI055271-PA	1	469.297	937.586	2	1.54		-0.997	0
ASTEI04496-PA	6.85	4	4	18	1037	117.041	7.09	Thorax,Brain,Fatbody
									NDQNRWYVFDELITHEQSYLDALHK		ASTEI04496-PA	1	784.379	3134.5	4	0.24		-0.189	1
ASTEI03878-PA	38.48	38	38	372	1320	143.54	6.06	Midgut,Brain,Salivary glands,Thorax,Proboscis,Male accessory glands,Antennae,Fatbody,Larvae,Ovary,Pupae,Malpighian tubules,Heamolymph,Legs,Maxillary palps,Testis
									iTDNNAVFDAIAAGSk	N-Term(iTRAQ4plex); K16(iTRAQ4plex)	ASTEI03878-PA	2	948.009	1895.01	2	4.52	81.88	-0.482	0
									QNGTGGEVPYK		ASTEI03878-PA	2	575.279	1149.55	2	3.03	55.87	-2.024	0
									RLEMLYDLLR		ASTEI03878-PA	3	661.368	1321.73	2	4.25	68.99	-1.068	1
									LmWYFLK	M2(Oxidation)	ASTEI03878-PA	2	508.767	1016.53	2	1.94	40.39	-0.335	0
									VTPHEDVQGLAWNRQVQHILASVFPSR		ASTEI03878-PA	1	771.911	3084.62	4	4.61	26.85	3.308	1
									LADLLSQYASLLAAQGSLPSALTYLGNSTDPEMEELRDR		ASTEI03878-PA	1	1403.7	4209.09	3	2.98	33.79	-3.141	1
									VAQWHPDVATQLWLASEEDQSPTVQLWDLR		ASTEI03878-PA	9	1173.58	3518.73	3	2.58	98.93	-0.612	0
									dLQELVEVSmLLQk	N-Term(iTRAQ4plex); M10(Oxidation); K14(iTRAQ4plex)	ASTEI03878-PA	1	650.367	1949.09	3	4.69	46.35	0.101	0
									lYYALGHk	N-Term(iTRAQ4plex); K8(iTRAQ4plex)	ASTEI03878-PA	1	418.247	1252.73	3	3.83	21.06	-2.116	0
									LVEAWQLSK		ASTEI03878-PA	39	537.302	1073.6	2	2.24	58.14	-1.568	0
									QKPPLPEQYVFMQTVFEELK		ASTEI03878-PA	1	817.759	2451.26	3	4.33	63.84	-0.613	0
									lMWYFLk	N-Term(iTRAQ4plex); K7(iTRAQ4plex)	ASTEI03878-PA	1	644.873	1288.74	2	2.44	35.66	1.597	0
									ANFENDPHAEmLNLLGYQADDTANK	M11(Oxidation)	ASTEI03878-PA	2	936.425	2807.26	3	1.39	27.86	1.373	0
									ITDNNAVFDAIAAGSK		ASTEI03878-PA	30	803.909	1606.81	2	4.36	72.17	2.106	0
									rLEmLYDLLR	N-Term(iTRAQ4plex); M4(Oxidation)	ASTEI03878-PA	1	494.614	1481.83	3	2.71	20.16	-0.092	1
									qVQHILASVFPSR	N-Term(iTRAQ4plex)	ASTEI03878-PA	3	542.648	1625.93	3	3.39	25.36	2.195	0
									QKPPLPEQYVFMQTVFEELKK		ASTEI03878-PA	4	645.594	2579.35	4	2.44	18.29	-2.031	1
									lQQEAASNADLAR	N-Term(iTRAQ4plex)	ASTEI03878-PA	2	765.906	1530.8	2	4.44	89.14	2.903	0
									QYVLDGPK		ASTEI03878-PA	3	460.248	919.488	2	1.8	44.01	-0.599	0
									DHDLVAScGK	C8(Carbamidomethyl)	ASTEI03878-PA	1	551.254	1101.5	2	3.38	41.14	0.49	0
									aNFENDPHAEMLNLLGYQADDTANk	N-Term(iTRAQ4plex); K25(iTRAQ4plex)	ASTEI03878-PA	1	1027.16	3079.46	3	5.33	52.82	-1.676	0
									GVLGLTWcSK	C8(Carbamidomethyl)	ASTEI03878-PA	5	560.796	1120.59	2	2.26	47.65	2.253	0
									IADSFPGmENIGHEPSQSVPLQSHGAVSNDLK	M8(Oxidation)	ASTEI03878-PA	1	845.156	3377.6	4	3.48		-1.224	0
									LVTFNGNSR		ASTEI03878-PA	1	504.27	1007.53	2	2.73	31.53	6.353	0
									VLNEGNFIEYcR	C11(Carbamidomethyl)	ASTEI03878-PA	17	757.363	1513.72	2	3.58	58.83	4.953	0
									ANFENDPHAEMLNLLGYQADDTANK		ASTEI03878-PA	8	931.092	2791.26	3	4.43	61.76	-0.747	0
									DLQELVEVSmLLQK	M10(Oxidation)	ASTEI03878-PA	3	830.946	1660.89	2	1.36	30.78	1.795	0
									QcVASAGNPQTK	C2(Carbamidomethyl)	ASTEI03878-PA	1	630.804	1260.6	2	3.95	59.8	0.468	0
									NAILcYIcAGSTER	C5(Carbamidomethyl); C8(Carbamidomethyl)	ASTEI03878-PA	4	814.382	1627.76	2	3.34	55.71	-0.592	0
									lmWYFLk	N-Term(iTRAQ4plex); M2(Oxidation); K7(iTRAQ4plex)	ASTEI03878-PA	1	652.87	1304.73	2		36.87	1.639	0
									GAPSTNGELAAGGDDELDKNNNSNR		ASTEI03878-PA	6	839.381	2516.13	3	0.99	10.64	1.902	1
									aNFENDPHAEmLNLLGYQADDTANk	N-Term(iTRAQ4plex); M11(Oxidation); K25(iTRAQ4plex)	ASTEI03878-PA	1	1032.49	3095.47	3	4.83	70.61	1.08	0
									LYYALGHK		ASTEI03878-PA	6	482.767	964.527	2	2.19	40.46	1.878	0
									NEDSNAVDGLSDQmAGLSR	M14(Oxidation)	ASTEI03878-PA	1	997.938	1994.87	2	3.17	101.95	-1.764	0
									IADSFPGMENIGHEPSQSVPLQSHGAVSNDLK		ASTEI03878-PA	16	841.158	3361.61	4	3.8	23.34	-0.055	0
									RPAGAcFGFGGK	C6(Carbamidomethyl)	ASTEI03878-PA	7	612.8	1224.59	2	4.28	61.94	-0.921	0
									EALVAAITHcK	C10(Carbamidomethyl)	ASTEI03878-PA	3	404.885	1212.64	3	2.49		0.22	0
									NPTPPPGWNDPPALK		ASTEI03878-PA	2	800.909	1600.81	2	2.3	17.53	-1.198	0
									QYVLDGPKNEDSNAVDGLSDQMAGLSR		ASTEI03878-PA	1	960.454	2879.35	3	3.31	59.02	0.261	1
									DLQELVEVSMLLQK		ASTEI03878-PA	2	822.948	1644.89	2	3.51	69.93	0.131	0
									ANFENDPHAEMLNLLGYQADDTANKFK		ASTEI03878-PA	3	767.363	3066.43	4	3.66	66.11	1.227	1
									NEDSNAVDGLSDQmAGLSRITDNNAVFDAIAAGSK	M14(Oxidation)	ASTEI03878-PA	1	1194.89	3582.66	3	0.04		0.785	1
									QVQHILASVFPSR		ASTEI03878-PA	3	741.414	1481.82	2	1.96	57.27	-0.458	0
									LMWYFLK		ASTEI03878-PA	7	500.773	1000.54	2	1.25	35.82	6.534	0
									TVTVNQVVTDPELMER		ASTEI03878-PA	19	915.965	1830.92	2	4.4	84.76	-1.732	0
									LQQEAASNADLAR		ASTEI03878-PA	68	693.853	1386.7	2	3	69.68	0.749	0
									yATAPAk	N-Term(iTRAQ4plex); K7(iTRAQ4plex)	ASTEI03878-PA	1	505.3	1009.59	2	2.35	38.82	0.444	0
									TVTVNQVVTDPELmER	M14(Oxidation)	ASTEI03878-PA	17	923.966	1846.92	2	1.87	40.68	1.961	0
									cVIWDLR	C1(Carbamidomethyl)	ASTEI03878-PA	2	481.249	961.491	2	1.92	49.18	-1.996	0
									NEDSNAVDGLSDQMAGLSR		ASTEI03878-PA	7	660.298	1978.88	3	2.62	63.78	0.457	0
									YATAPAK		ASTEI03878-PA	1	361.198	721.388	2	1.49	40.36	0.233	0
									aNFENDPHAEmLNLLGYQADDTANkFk	N-Term(iTRAQ4plex); M11(Oxidation); K25(iTRAQ4plex); K27(iTRAQ4plex)	ASTEI03878-PA	1	879.441	3514.74	4	2.37		4.035	1
ASTEI06710-PA	7.13	4	4	5	603	70.676	6.24	Midgut,Brain,Ovary,Fatbody,Testis
									IGENQcPLDDINAEQLR	C6(Carbamidomethyl)	ASTEI06710-PA	1	992.974	1984.94	2	3.69	83.44	0.617	0
									ERVEYLAK		ASTEI06710-PA	1	504.282	1007.56	2		21.17	4.835	1
									SEEAAELLAEK		ASTEI06710-PA	2	595.301	1189.6	2	2.29	68	0.335	0
ASTEI03636-PA	20.17	7	7	9	481	55.462	7.53	Proboscis
									GFIPLFEEK		ASTEI03636-PA	1	540.291	1079.57	2	1.63	28.93	-2.859	0
									EASLASAESGGNQFSLIDQLK		ASTEI03636-PA	1	1083.04	2165.07	2	5.4	102.08	-3.205	0
									AVNIFLHPQWLYR		ASTEI03636-PA	2	552.97	1656.89	3	3.65	39.41	-3.602	0
									LPGPLNFPLIGSMYVIPGR		ASTEI03636-PA	1	1021.07	2041.13	2	5.5	85.8	-0.3	0
									FTPLHGIFSLPAYK		ASTEI03636-PA	1	530.96	1590.87	3	2.91	49.83	-0.83	0
									LLPIAAVIGR		ASTEI03636-PA	2	511.838	1022.67	2	1.62	54.36	-2.78	0
									FALLPFSGGPR		ASTEI03636-PA	1	581.323	1161.64	2	2.31	58.35	-2.035	0
ASTEI05455-PA	41.92	11	11	234	229	22.667	10.9	Midgut,Salivary glands,Brain,Proboscis,Antennae,Fatbody,Ovary,Malpighian tubules,Male accessory glands,Legs,Maxillary palps
									SFADDGPK		ASTEI05455-PA	5	418.694	836.38	2	1.79	51.04	2.05	0
									VEIENVPFFNAPIYMEGEK		ASTEI05455-PA	28	1113.54	2226.08	2	3.84	67.3	-0.629	0
									VDEIFGNLRDYYVSIK		ASTEI05455-PA	4	966.005	1931	2	3.31	48.41	6.091	1
									vDEIFGNLR	N-Term(iTRAQ4plex)	ASTEI05455-PA	2	603.835	1206.66	2	3.21	49.17	2.635	0
									LFIDSAK		ASTEI05455-PA	18	397.226	793.446	2	1.76	36.94	0.168	0
									dYYVSIk	N-Term(iTRAQ4plex); K7(iTRAQ4plex)	ASTEI05455-PA	1	588.331	1175.65	2	2.67	32.43	-0.39	0
									LSDNMKPDGFQQK		ASTEI05455-PA	21	754.363	1507.72	2	2.9	24.91	-1.158	0
									lFIDSAk	N-Term(iTRAQ4plex); K7(iTRAQ4plex)	ASTEI05455-PA	2	541.328	1081.65	2	2.65	38	-0.464	0
									QIGKVDEIFGNLR		ASTEI05455-PA	4	744.913	1488.82	2	3.2	63.9	0.63	1
									VEIENVPFFNAPIYmEGEK	M15(Oxidation)	ASTEI05455-PA	24	1121.54	2242.07	2	1.55	45.14	-0.426	0
									QKLFIDSAK		ASTEI05455-PA	1	525.303	1049.6	2	1.69	22.61	-0.092	1
									vEIENVPFFNAPIYmEGEk	N-Term(iTRAQ4plex); M15(Oxidation); K19(iTRAQ4plex)	ASTEI05455-PA	1	844.101	2530.29	3	2.64	27.82	4.263	0
									VDEIFGNLR		ASTEI05455-PA	26	531.784	1062.56	2	2.25	42.67	3.118	0
									DYYVSIK		ASTEI05455-PA	14	444.23	887.452	2	0.99		1.368	0
									LSDNmKPDGFQQK	M5(Oxidation)	ASTEI05455-PA	21	508.577	1523.72	3	1.4	29.56	-0.22	0
ASTEI00264-PA	58.33	12	12	182	300	34.548	6.32	Midgut,Brain,Salivary glands,Proboscis,Male accessory glands,Antennae,Fatbody,Ovary,Pupae,Malpighian tubules,Legs,Maxillary palps,Testis
									FLLIHELDLIcR	C11(Carbamidomethyl)	ASTEI00264-PA	19	514.623	1541.85	3	3.47	42.55	2.025	0
									IFccHGGLSPDLNHMEQIK	C3(Carbamidomethyl); C4(Carbamidomethyl)	ASTEI00264-PA	1	752.686	2256.04	3	7.84	44.51	2.969	0
									LFEYGGFPPEANYLFLGDYVDR		ASTEI00264-PA	30	861.418	2582.24	3	2.19	13.26	5.767	0
									AKYQYSGTNNQRPQTPQR		ASTEI00264-PA	1	535.018	2137.05	4	2.63	19.34	-1.04	1
									AHQVVEDGYEFFAR		ASTEI00264-PA	24	834.396	1667.79	2	4.04	57.45	2.041	0
									EIFLQQPILLELEAPLK		ASTEI00264-PA	32	997.583	1994.16	2	2.8	59.75	0.701	0
									IcGDIHGQYTDLLR	C2(Carbamidomethyl)	ASTEI00264-PA	12	554.278	1660.82	3	3.22	32.81	5.419	0
									GVSFTFGVDIVAK		ASTEI00264-PA	2	670.368	1339.73	2	2.6	49.9	2.227	0
									TFTDcFNcLPIAAIIDEK	C5(Carbamidomethyl); C8(Carbamidomethyl)	ASTEI00264-PA	18	1064.51	2128.01	2	3.5	53.17	0.02	0
									SREIFLQQPILLELEAPLK		ASTEI00264-PA	4	746.434	2237.29	3	6.77	45.01	-1.578	1
ASTEI08243-PA	5.7	1	1	2	193	22.588	9.48	Testis
									IVALVTVGDKK		ASTEI08243-PA	2	571.862	1142.72	2	3.45	69.88	2.031	1
ASTEI01959-PA	13.11	5	5	6	740	84.372	6.95	Midgut,Thorax,Ovary,Malpighian tubules
									aDVLEAILHR	N-Term(iTRAQ4plex)	ASTEI01959-PA	1	427.587	1280.75	3	3.68	59.73	1.29	0
									EAYEDcQLALDGDYPEEK	C6(Carbamidomethyl)	ASTEI01959-PA	1	1072.95	2144.9	2	3.39	49.07	0.103	0
									ETAVSFVPVYDPNGR		ASTEI01959-PA	1	825.91	1650.81	2	3.51	57.6	0.383	0
									ADVLEAILHR		ASTEI01959-PA	1	568.823	1136.64	2	1.36	13.26	-4.002	0
									YAmAALMLSIYLMEFTPFLSEHGFPQEVTGGHLPNYcAALIMR	M3(Oxidation); C37(Carbamidomethyl)	ASTEI01959-PA	1	1227.35	4906.37	4	1.46		1.884	0
ASTEI09210-PA	23.4	8	8	12	829	92.473	5.44	Midgut,Brain,Proboscis
									VKPYYAVK		ASTEI09210-PA	1	323.192	967.561	3	2.2	31.18	0.168	0
									FGcDPISEAPELLR	C3(Carbamidomethyl)	ASTEI09210-PA	1	802.392	1603.78	2	4.6	50.88	-0.65	0
									TIGYDFSLLDIGGGFPGDNNKPIDR		ASTEI09210-PA	2	894.447	2681.33	3	4.03	50.26	1.962	0
									IHQYYPEAR		ASTEI09210-PA	1	588.792	1176.58	2	2.6	47.22	-1.672	0
									IIAEPGR		ASTEI09210-PA	1	378.224	755.441	2	1.58	42.63	0.196	0
									MGPHEDPLHVLDLDDVVR		ASTEI09210-PA	1	686.343	2057.02	3	2.63	20.89	1.671	0
ASTEI09490-PA	17.82	3	3	8	174	19.857	6.8	Brain
									LVHGLGQLVDGQK		ASTEI09490-PA	5	682.387	1363.77	2	1.16	24.65	-1.4	0
									IYPYSQYDR		ASTEI09490-PA	2	602.785	1204.56	2	0.63	20.86	-0.237	0
									EYLQIDLLK		ASTEI09490-PA	1	567.824	1134.64	2	1.46	39.97	-0.422	0
ASTEI09785-PA	41.08	18	18	37	628	72.086	6.46	Midgut,Ovary,Fatbody,Heamolymph,Testis
									GTLLVEVPLTNPK		ASTEI09785-PA	4	690.908	1380.81	2	2.34	41.67	-0.723	0
									ANPADGHIAHYVDYIK		ASTEI09785-PA	3	595.298	1783.88	3	4.42	23.7	2.46	0
									NPNAIVTLR		ASTEI09785-PA	3	499.288	997.568	2		24.27	-10.998	0
									WLGEPIDVIVVPANIFLTNAK		ASTEI09785-PA	4	1155.15	2309.29	2	3.96	35.4	-0.92	0
									ELFVFVHPNKDSDPIDNNR		ASTEI09785-PA	1	752.709	2256.11	3	4.08	28.05	4.001	1
									VNcSSVTVPIVHWNYER	C3(Carbamidomethyl)	ASTEI09785-PA	1	687.338	2060	3	5.51	45.09	-0.81	0
									SDLLLSSSQWLNR		ASTEI09785-PA	1	759.899	1518.79	2	2.87	91.57	-0.453	0
									AALNASQTTGcK	C11(Carbamidomethyl)	ASTEI09785-PA	2	611.298	1221.59	2	3.39	68.12	-0.986	0
									VWYEWcLSTPVVTHVHNIDGR	C6(Carbamidomethyl)	ASTEI09785-PA	2	856.757	2568.26	3	3.56	37.29	4.852	0
									VALELTADVPKQDEIYR		ASTEI09785-PA	1	654.019	1960.04	3	4.9	47.93	1.431	1
									HMEQMYVAYQK		ASTEI09785-PA	1	714.327	1427.65	2	2.22		1.738	0
									YIFYQNAIEQALLDR		ASTEI09785-PA	4	928.984	1856.96	2	4.46	52.36	3.73	0
									IGDNLDLDSPIDcIRR	C13(Carbamidomethyl)	ASTEI09785-PA	1	936.472	1871.94	2		33.19	5.12	1
									QLKEDGISIPcQSTSYINPcFASK	C11(Carbamidomethyl); C20(Carbamidomethyl)	ASTEI09785-PA	1	915.107	2743.31	3	2.8	48.18	0.11	1
									IGDNLDLDSPIDcIR	C13(Carbamidomethyl)	ASTEI09785-PA	3	858.417	1715.83	2	5.62	104.4	0.277	0
									DSDPIDNNR		ASTEI09785-PA	1	523.23	1045.45	2	2.33	41.94	-1.426	0
									DcTNFAR	C2(Carbamidomethyl)	ASTEI09785-PA	1	442.19	883.372	2	2.12	46.33	-0.676	0
									ADILVSELLGSFGDNELSPEcLDGAQK	C21(Carbamidomethyl)	ASTEI09785-PA	3	1439.19	2877.38	2	1.61	19.34	-0.857	0
ASTEI03655-PA	11.4	5	5	6	535	58.666	6.92	Brain,Legs
									LcWTFSLYDINHDGK	C2(Carbamidomethyl)	ASTEI03655-PA	1	623.629	1868.87	3	3.75	53.85	5.142	0
									YRPESIAALcEATR	C10(Carbamidomethyl)	ASTEI03655-PA	1	546.273	1636.81	3	4.93	13.01	-3.793	0
									AEcPAGIIR	C3(Carbamidomethyl)	ASTEI03655-PA	1	493.758	986.509	2	1.65	29.92	-0.06	0
									NKVDTIFQK		ASTEI03655-PA	1	546.807	1092.61	2	2.68	46	1.633	1
									VAPPPDVPTPTLVK		ASTEI03655-PA	2	715.916	1430.83	2	1.5	24.71	-0.21	0
ASTEI10070-PA	4.15	2	2	2	1324	146.962	5.53	Midgut,Ovary
									QSLVSDEDENVYDLDR		ASTEI10070-PA	1	948.93	1896.85	2	1.97	15.6	4.012	0
									TPEVDYANmPTQPFSPPEFLYQPEADGGTNGGSESPcAR	M9(Oxidation); C37(Carbamidomethyl)	ASTEI10070-PA	1	1410.61	4229.82	3	0.24		-2.078	0
ASTEI08318-PA	33.33	2	2	11	66	7.413	11.33	Brain,Male accessory glands,Antennae,Ovary,Legs,Maxillary palps
									GIQIGSAWFQR		ASTEI08318-PA	7	631.836	1262.67	2	1.55	28.66	1.272	0
									GIHLVTEEILR		ASTEI08318-PA	4	427.255	1279.75	3	4.2	51.27	9.65	0
ASTEI11155-PA	28.23	24	24	42	953	111.176	7.06	Male accessory glands,Brain,Testis
									RQELFEmAPISLNNLFELR	M7(Oxidation)	ASTEI11155-PA	1	779.407	2336.21	3	7.65	50.74	-0.35	1
									cPYLEAIHWGQLAK	C1(Carbamidomethyl)	ASTEI11155-PA	1	562.622	1685.85	3	6.12	44.87	1.962	0
									TADVIGcYNTINER	C7(Carbamidomethyl)	ASTEI11155-PA	3	813.384	1625.76	2	4.03	103.72	1.565	0
									QQFADEAAFTASIEDINAYISK		ASTEI11155-PA	1	1216.58	2432.16	2	3.93	50.67	-1.021	0
									VAGANELEAILQEK		ASTEI11155-PA	4	742.9	1484.79	2	3.96	102.74	-2.139	0
									YLQNSWIER		ASTEI11155-PA	3	604.807	1208.61	2	2.58	47.74	1.516	0
									RLELTAALLK		ASTEI11155-PA	2	564.364	1127.72	2	3.13	35.57	4.688	1
									GLQQTHDSLKDLLPLFR		ASTEI11155-PA	1	661.035	1981.09	3	2.62		1.89	1
									WNALAYPR		ASTEI11155-PA	2	495.756	990.505	2	2.92	39.03	-10.722	0
									VSEMSVEVR		ASTEI11155-PA	1	518.261	1035.52	2	2.48	36.79	1.515	0
									SPIAYLLDcFRR	C9(Carbamidomethyl)	ASTEI11155-PA	1	504.266	1510.78	3	2.49	25.53	-0.211	1
									SPIAYLLDcFR	C9(Carbamidomethyl)	ASTEI11155-PA	2	677.845	1354.68	2	3.88	86.6	0.8	0
									FTTLYDVSK		ASTEI11155-PA	3	537.28	1073.55	2	2.51	52.21	0.509	0
									EALLEYYR		ASTEI11155-PA	1	528.771	1056.54	2	2.29	45.35	-0.696	0
									ELFFTNVK		ASTEI11155-PA	2	499.271	997.536	2	1.81	38.33	0.28	0
									ELWTVAADYLK		ASTEI11155-PA	5	654.844	1308.68	2	2.25	25.8	-2.21	0
									YQFISNYTAQR		ASTEI11155-PA	1	695.841	1390.67	2	2.94	67.56	-0.641	0
									LEETWIGNPLASVDLEGVRR		ASTEI11155-PA	1	752.068	2254.19	3	3.38	27.7	3.372	1
									HLTQDSSVAIK		ASTEI11155-PA	1	599.824	1198.64	2	2.22	49.28	-1.362	0
									SILYEYEILDGFLHNLPDADFQQK		ASTEI11155-PA	1	956.808	2868.41	3	3.48	42.25	0.149	0
									LEETWIGNPLASVDLEGVR		ASTEI11155-PA	1	1049.54	2098.08	2	5.84	92.46	-0.364	0
									DLLPLFR		ASTEI11155-PA	1	437.263	873.519	2	1.61	41.78	-0.462	0
									IGDGNFNIGVSR		ASTEI11155-PA	1	624.821	1248.63	2	3.54	79.39	1.103	0
									EFIEQIK		ASTEI11155-PA	2	453.75	906.493	2	1.95	27.7	0.336	0
ASTEI02485-PA	3.89	2	2	2	566	62.04	7.27	Midgut,Brain
									ITESYGAQDR		ASTEI02485-PA	1	570.27	1139.53	2	3.34	63.73	0.198	0
									TLHDIEDYFQQR		ASTEI02485-PA	1	782.872	1564.74	2	3	52.86	-1.813	0
ASTEI06270-PA	10.89	10	10	14	1212	129.827	7.81	Brain,Ovary,Testis
									SSSGESLPGGAVAAAVSSHPYK		ASTEI06270-PA	1	687.008	2059.01	3	2.11	24.2	-0.046	0
									EEVESNEVIDLTDK		ASTEI06270-PA	2	810.386	1619.77	2	2.77	31.53	0.129	0
									ASPTNAPIQEENEDPQYGSGTSR		ASTEI06270-PA	2	1224.55	2448.09	2	3.32	62.89	-0.478	0
									LQSIWAR		ASTEI06270-PA	2	437.255	873.503	2	1.64	17.47	9.755	0
									EEVESNEVIDLTDKK		ASTEI06270-PA	2	583.288	1747.85	3	3.67	71.5	-6.348	1
									IAEEAAQQR		ASTEI06270-PA	1	508.264	1015.52	2	2.38	43.28	4.167	0
									LVGTGLAIR		ASTEI06270-PA	1	450.287	899.567	2	0.78	44.75	-0.908	0
									ALLGESTTSTIAPSELARPPcQAAVETLQK	C21(Carbamidomethyl)	ASTEI06270-PA	1	1047.21	3139.63	3	4.13	26.58	-0.868	0
									TVVMPIAR		ASTEI06270-PA	1	443.763	886.518	2		33.28	0.608	0
ASTEI00351-PA	22.4	9	9	24	509	57.04	5.24	Brain,Antennae
									LSWMYDLSER		ASTEI00351-PA	1	650.305	1299.6	2	2.08	57.05	-0.503	0
									SLEELMLENNYIK		ASTEI00351-PA	1	798.403	1595.8	2	2.96	53.59	0.478	0
									LESNQIAVLAR		ASTEI00351-PA	5	607.353	1213.7	2	2.03	61.15	6.854	0
									DAFVDVPK		ASTEI00351-PA	2	445.735	890.462	2	1.36	34.59	-0.093	0
									AFDGLTSLNYLHLENNR		ASTEI00351-PA	5	988.996	1976.98	2	3.03	21.82	0.71	0
									AScSIFDGELPR	C3(Carbamidomethyl)	ASTEI00351-PA	5	676.316	1351.62	2	3.24	38.08	-4.602	0
									LAcHcTPESNAK	C3(Carbamidomethyl); C5(Carbamidomethyl)	ASTEI00351-PA	1	463.208	1387.61	3	2.46	39.73	-0.309	0
									VLNLPNNQIVTLHNNAFAYHK		ASTEI00351-PA	2	605.826	2420.28	4	5.17	19.72	-0.431	0
									EPPQTVNVLK		ASTEI00351-PA	2	562.818	1124.63	2	1.81	52.85	-1.756	0
ASTEI07018-PA	72.57	33	33	184	412	47.075	5.97	Midgut,Brain,Salivary glands,Thorax,Proboscis,Male accessory glands,Antennae,Fatbody,Ovary,Malpighian tubules,Heamolymph,Maxillary palps,Testis
									QEMDNQSIEAR		ASTEI07018-PA	6	660.8	1320.59	2	1.08	26.55	6.537	0
									TELSETLTEIcK	C11(Carbamidomethyl)	ASTEI07018-PA	21	712.354	1423.7	2	3.05	73.14	1.192	0
									LLTDKVSDIMGNLFSK		ASTEI07018-PA	1	594.327	1780.97	3	2.13	20.03	8.059	1
									GQVIGQSGAFR		ASTEI07018-PA	4	560.299	1119.59	2	1.9	22.28	0.138	0
									MKYDESENPMIR		ASTEI07018-PA	1	504.899	1512.68	3	1.14	35.77	-0.167	1
									VEVSMATDPSR		ASTEI07018-PA	7	596.285	1191.56	2	2.24	43.64	-3.219	0
									iDPSFDQk	N-Term(iTRAQ4plex); K8(iTRAQ4plex)	ASTEI07018-PA	1	619.337	1237.67	2	2.65	20.07	0.071	0
									IDPSFDQK		ASTEI07018-PA	4	475.228	949.45	2	2.36	27.2	-13.574	0
									SSEVLKENLDK		ASTEI07018-PA	1	631.335	1261.66	2	1.6	47.29	-0.179	1
									FYQSWEDFKNNNQYVNK		ASTEI07018-PA	7	742.01	2224.01	3	2.59	26.34	2.128	1
									GVGETLAEK		ASTEI07018-PA	2	452.243	903.479	2	1.75	48.46	0.964	0
									iLDIENVDLAmGk	N-Term(iTRAQ4plex); M11(Oxidation); K13(iTRAQ4plex)	ASTEI07018-PA	2	867.982	1734.96	2	2.97	68.8	1.438	0
									ILDIENVDLAmGK	M11(Oxidation)	ASTEI07018-PA	5	723.877	1446.75	2	2.6	65.29	-2.731	0
									VEVSmATDPSR	M5(Oxidation)	ASTEI07018-PA	5	604.284	1207.56	2	1.35	90.63	-1.088	0
									YDESENPMIR		ASTEI07018-PA	2	627.279	1253.55	2	3.19	81.32	3.853	0
									VSDIMGNLFSK		ASTEI07018-PA	8	605.81	1210.61	2	1.79	70.81	-0.005	0
									vSDIMGNLFSk	N-Term(iTRAQ4plex); K11(iTRAQ4plex)	ASTEI07018-PA	2	749.914	1498.82	2	3.26	62.55	1.283	0
									LEQSDALK		ASTEI07018-PA	1	452.242	903.478	2	2.82	45.05	-0.578	0
									DPNELDPK		ASTEI07018-PA	3	464.224	927.441	2	2.78	55.39	-0.626	0
									RPGFFTQVIDNIKQEmEK	M16(Oxidation)	ASTEI07018-PA	1	732.697	2196.08	3	6.96	53.16	-16.104	1
									MTEALDEASKTDLAR		ASTEI07018-PA	1	825.901	1650.8	2	5.34	82.1	-3.303	1
									YDESENPmIR	M8(Oxidation)	ASTEI07018-PA	2	635.277	1269.55	2	1.13	14.54	4.156	0
									ILDIENVDLAMGK		ASTEI07018-PA	14	715.884	1430.76	2	2.67	74.39	3.752	0
									KRVEVSMATDPSR		ASTEI07018-PA	8	492.592	1475.76	3	3.09	41.08	-1.48	2
									gTVIEGDPEk	N-Term(iTRAQ4plex); K10(iTRAQ4plex)	ASTEI07018-PA	1	666.866	1332.73	2	2.64	19.31	0.5	0
									FNTVESEASK		ASTEI07018-PA	4	556.267	1111.53	2	1.46	51.73	-0.643	0
									KAGQLGEELSK		ASTEI07018-PA	1	580.318	1159.63	2	4.44	79.38	-1.921	1
									vVEPNAEATGVELHkDSk	N-Term(iTRAQ4plex); K15(iTRAQ4plex); K18(iTRAQ4plex)	ASTEI07018-PA	1	589.578	2355.29	4	2.92		1.514	1
									GTVIEGDPEK		ASTEI07018-PA	4	522.759	1044.51	2	2.26	51.82	-10.441	0
									FYQSWEDFK		ASTEI07018-PA	4	625.279	1249.55	2	1.71	37.17	-1.592	0
									VVEPNAEATGVELHKDSK		ASTEI07018-PA	8	641.666	1922.98	3	5	69.88	0.071	1
									VVEPNAEATGVELHK		ASTEI07018-PA	12	531.616	1592.83	3	1.89	19.64	2.819	0
									AGQLGEELSK		ASTEI07018-PA	1	516.271	1031.54	2	1.84	53.2	-2.16	0
									RPGFFTQVIDNIK		ASTEI07018-PA	3	767.924	1534.84	2	4.43	52.03	1.739	0
									SSEVLKENLDKIR		ASTEI07018-PA	1	510.946	1530.82	3	4.37	37.66	-16.689	2
									DWcFESTYNIIATPISQAQK	C3(Carbamidomethyl)	ASTEI07018-PA	2	1186.57	2372.12	2	1.98	14.97	1.048	0
									FREEAQKLEQSDALK		ASTEI07018-PA	7	896.468	1791.93	2	4.55	83.42	3.128	2
									RVEVSMATDPSR		ASTEI07018-PA	3	674.339	1347.67	2	2.2	34.78	2.283	1
ASTEI10158-PA	8.56	4	4	4	432	50.763	9.22	Testis
									YWIGEIEDR		ASTEI10158-PA	1	590.785	1180.56	2	2.39	47.6	-1.31	0
									LLPIGANESSTAK		ASTEI10158-PA	1	650.858	1300.71	2	2.15	24.97	-1.806	0
									LFELFVR		ASTEI10158-PA	1	462.272	923.537	2	2.27	35.5	1.981	0
									QLQLALAR		ASTEI10158-PA	1	456.785	912.562	2	2.4	46.91	-0.16	0
ASTEI08188-PA	33.57	3	3	53	143	16.061	8.13	Midgut,Brain,Thorax,Salivary glands,Proboscis,Male accessory glands,Antennae,Fatbody,Larvae,Pupae,Malpighian tubules,Legs,Head,Maxillary palps
									AGWLLWQTVGK		ASTEI08188-PA	30	629.852	1258.7	2	2.3	35.72	1.205	0
									QFFQGDPTEEAPVNEK		ASTEI08188-PA	16	918.429	1835.85	2	4.13	34.53	3.686	0
									GDIIETGTDLNIEGGVTEHVK		ASTEI08188-PA	5	733.037	2197.09	3	2.74	23.04	-1.402	0
									qFFQGDPTEEAPVNEk	N-Term(iTRAQ4plex); K16(iTRAQ4plex)	ASTEI08188-PA	1	708.688	2124.05	3	2.45		0.783	0
									gDIIETGTDLNIEGGVTEHVk	N-Term(iTRAQ4plex); K21(iTRAQ4plex)	ASTEI08188-PA	1	829.107	2485.31	3	8.16	70.06	1.427	0
ASTEI00662-PA	14.35	7	7	11	697	76.722	6.74	Proboscis,Malpighian tubules,Salivary glands,Maxillary palps
									LANPVSFSFR		ASTEI00662-PA	1	569.306	1137.61	2	2.64	59.03	0.089	0
									VVFTNFIRPAcLYTADR	C11(Carbamidomethyl)	ASTEI00662-PA	2	681.687	2043.05	3	1.78	27.89	-0.446	0
									YNDLALVELSER		ASTEI00662-PA	2	711.366	1421.72	2	2.39	80.51	-1.404	0
									VSLDLYTTPAcAQYFQR	C11(Carbamidomethyl)	ASTEI00662-PA	1	1016.99	2032.98	2	2.49	46.52	0.259	0
									TVYNDIALLK		ASTEI00662-PA	3	575.33	1149.65	2	2.08	37.41	1.676	0
									ELTTDSVAISALTLNPTLVK		ASTEI00662-PA	1	1043.59	2086.17	2	3.78	35.9	2.263	0
									QDDGAEPEDYGIQR		ASTEI00662-PA	1	796.843	1592.68	2	2.75	75	-2.281	0
ASTEI06849-PA	1.45	1	1	1	1238	141.111	8.65	Legs
									LVPLNLLMIAFGTLAYDR		ASTEI06849-PA	1	674.06	2020.16	3	4.6	76.22	17.503	0
ASTEI06646-PA	1.2	1	1	1	832	86.647	6.14	Salivary glands
									FIDFNFmFSR	M7(Oxidation)	ASTEI06646-PA	1	670.312	1339.62	2	1.37	19.34	1.477	0
ASTEI07975-PA	24.29	2	2	5	140	16.547	8.31	Midgut,Brain,Ovary,Legs
									YLMNPFYTPNTPIK		ASTEI07975-PA	3	849.932	1698.86	2	3.66	89.51	0.266	0
									SIDKFNQWFVSGFVTASHLR		ASTEI07975-PA	2	585.554	2339.19	4	4.48	48.6	0.538	1
ASTEI05644-PA	42.01	13	13	49	369	40.345	6.65	Midgut,Brain,Proboscis,Antennae,Fatbody,Ovary,Malpighian tubules,Salivary glands,Heamolymph,Maxillary palps,Testis
									LITSFRK		ASTEI05644-PA	1	432.77	864.532	2	1.56	22.07	2.327	1
									YALEQAFVSVSNQAR		ASTEI05644-PA	10	841.929	1682.85	2	2.82	76.17	0.615	0
									DcDVIVTATGSSEPLVYR	C2(Carbamidomethyl)	ASTEI05644-PA	1	661.323	1981.96	3	3.74	55.72	0.971	0
									EVLLEEAK		ASTEI05644-PA	1	465.76	930.513	2	1.89	34.15	-0.877	0
									TATASLVATDHLFLRPAR		ASTEI05644-PA	2	647.362	1940.07	3	3.02	18.95	0.824	0
									SRPVFIDEDQVK		ASTEI05644-PA	11	716.877	1432.75	2	4.48	66.18	2.52	0
									FADQPVSSQPAR		ASTEI05644-PA	10	651.825	1302.64	2	2.82	45	-0.114	0
									KELATLR		ASTEI05644-PA	1	415.759	830.51	2	2.66	41.08	1.147	1
									ATDSNYSVFVcDTVEDccR	C11(Carbamidomethyl); C17(Carbamidomethyl); C18(Carbamidomethyl)	ASTEI05644-PA	1	1149.46	2297.91	2	5.58	140.95	-1.872	0
									AEEMSLLPK		ASTEI05644-PA	2	509.268	1017.53	2	2.14	40.87	0.4	0
									SGGISVFQSLGMATEDVTVGR		ASTEI05644-PA	1	1056.03	2111.05	2	6.81	125.78	3.185	0
									LKEVLLEEAK		ASTEI05644-PA	4	586.351	1171.69	2	3.34	67.18	1.732	1
									SGGISVFQSLGmATEDVTVGR	M12(Oxidation)	ASTEI05644-PA	2	1064.02	2127.04	2	5.16	106.92	0.731	0
ASTEI06565-PA	68.97	5	5	62	145	15.608	5.86	Midgut,Proboscis,Antennae,Fatbody,Ovary,Legs,Maxillary palps
									YNAPRYPGQF		ASTEI06565-PA	1	606.793	1212.58	2	3.54	43.76	-0.02	1
									NPAVYGGPEASAVILNQVYEPNPDGSYIYSYETSNGIR		ASTEI06565-PA	9	1369	4104.97	3	1.75		6.778	0
ASTEI09280-PA	33.51	3	3	21	188	19.99	9.03	Midgut,Fatbody,Larvae,Pupae,Malpighian tubules
									QAVATAcPGNAFFNEIR	C7(Carbamidomethyl)	ASTEI09280-PA	5	933.452	1865.9	2	1.45	17.5	-0.052	0
									SVGMGVIGTFTNGIPNAAAR		ASTEI09280-PA	5	967	1932.99	2	3.13	74.59	-1.505	0
									NAAQQLIScGVSLGHIASNYWLIGHR	C9(Carbamidomethyl)	ASTEI09280-PA	5	717.12	2865.46	4	5.99	22.12	-0.046	0
									SVGmGVIGTFTNGIPNAAAR	M4(Oxidation)	ASTEI09280-PA	6	974.998	1948.99	2	3.08	91.07	-1.514	0
ASTEI05041-PA	2.62	5	5	5	2370	257.044	5.02	Ovary,Male accessory glands
									GPLSNTPAIIQSDPR		ASTEI05041-PA	1	783.416	1565.82	2	3.6	98.24	-2.48	0
									KYTGGSIPSR		ASTEI05041-PA	1	533.288	1065.57	2	2.21	36.76	-0.8	1
									VLQQITDTLDEAEAEK		ASTEI05041-PA	1	901.952	1802.9	2	3.01	34.74	-3.249	0
									DLDDEVAK		ASTEI05041-PA	1	452.715	904.423	2	1.84	24.21	-2.814	0
									VSPPSTQPSPSTK		ASTEI05041-PA	1	656.841	1312.67	2	2.63	58.13	-0.378	0
ASTEI01866-PA	57.14	6	6	47	133	14.305	8.38	Brain,Proboscis,Antennae,Fatbody,Legs
									IVASNENGDTMTYR		ASTEI01866-PA	8	785.863	1570.72	2	4.47	125.08	1.36	0
									MASTTGNWLADLTR		ASTEI01866-PA	5	768.877	1536.75	2	3.77	114.65	-0.143	0
									GcQLDGGKTDPcQIAYGK	C2(Carbamidomethyl); C12(Carbamidomethyl)	ASTEI01866-PA	3	656.635	1967.89	3	4.9	44.55	-2.794	1
									mASTTGNWLADLTR	M1(Oxidation)	ASTEI01866-PA	5	776.877	1552.75	2	3.74	101.24	3.055	0
									IVASNENGDTmTYR	M11(Oxidation)	ASTEI01866-PA	5	793.859	1586.71	2	4.02	111.09	0.012	0
									IEYFGGTEITVPmVcQK	M13(Oxidation); C15(Carbamidomethyl)	ASTEI01866-PA	1	994.478	1987.95	2	2.97	46.07	-0.473	0
									TDPcQIAYGK	C4(Carbamidomethyl)	ASTEI01866-PA	4	576.772	1152.54	2	0.72	26.65	1.291	0
									NSAIVAETcTPSK	C9(Carbamidomethyl)	ASTEI01866-PA	9	689.337	1377.67	2	3.23	80.69	-1.522	0
									IEYFGGTEITVPMVcQK	C15(Carbamidomethyl)	ASTEI01866-PA	7	986.488	1971.97	2	3.33	75.2	7.097	0
ASTEI01397-PA	39	11	11	37	359	40.324	8.62	Midgut,Salivary glands,Male accessory glands,Ovary,Testis
									ILLGANFR		ASTEI01397-PA	2	452.274	903.541	2	1.98	49.86	0.149	0
									TTTILcLAR	C6(Carbamidomethyl)	ASTEI01397-PA	2	524.794	1048.58	2	2.31	66.69	-0.376	0
									FALAcNTSEK	C5(Carbamidomethyl)	ASTEI01397-PA	2	570.772	1140.54	2	2.87	68.51	0.653	0
									IVILDEADSMTEGAQQALR		ASTEI01397-PA	3	1030.52	2060.03	2	1.86	60.14	0.496	0
									IVDGLNSLLQmSGLLAR	M11(Oxidation)	ASTEI01397-PA	1	908.503	1816	2	4.53	87.95	-0.332	0
									NLPWIEK		ASTEI01397-PA	1	450.255	899.503	2	1.23	23.99	5.441	0
									IVDGLNSLLQMSGLLAR		ASTEI01397-PA	1	900.509	1800.01	2	2.98	77.17	2.808	0
									IIEPIQSR		ASTEI01397-PA	4	478.282	955.557	2	2.11	41.88	0.154	0
									EAVLELNASNER		ASTEI01397-PA	1	672.844	1344.68	2	3.38	68.78	4.366	0
									LGYAAEDIIGNVFR		ASTEI01397-PA	7	769.404	1537.8	2	4.32	85.5	-0.264	0
									FEEIVGNEETVAR		ASTEI01397-PA	6	746.868	1492.73	2	2.18	62.11	0.287	0
									LGIFASQGNAPNIIIAGPPGVGK		ASTEI01397-PA	7	1096.11	2191.22	2	6.42	114.5	-2.031	0
ASTEI09127-PA	20.93	4	4	6	258	28.214	7.4	Brain
									TNEMLLNcNALSASR	C8(Carbamidomethyl)	ASTEI09127-PA	1	847.402	1693.8	2	1.42	35.72	-2.069	0
									DLDYIFR		ASTEI09127-PA	3	471.24	941.473	2	0.63		-0.04	0
									IGNQYPSAFAEAEAK		ASTEI09127-PA	1	798.388	1595.77	2	4.43	61.04	-0.85	0
									EQPVDGGTPSAASTPVK		ASTEI09127-PA	1	820.913	1640.82	2	2.82	71.93	3.632	0
ASTEI00574-PA	59.19	32	32	268	615	69.942	8.25	Midgut,Brain,Salivary glands,Male accessory glands,Antennae,Fatbody,Ovary,Pupae,Malpighian tubules,Heamolymph,Legs,Head,Maxillary palps,Testis
									KScVYALQLQDLcSSER	C3(Carbamidomethyl); C13(Carbamidomethyl)	ASTEI00574-PA	1	1028.99	2056.98	2	4.52	88.12	1.159	1
									ScVYALQLQDLcSSER	C2(Carbamidomethyl); C12(Carbamidomethyl)	ASTEI00574-PA	4	964.947	1928.89	2	3.82	126.1	1.678	0
									LAHYKEDASLNSR		ASTEI00574-PA	6	501.923	1503.76	3	1.39		-0.17	1
									TPcKDFDLR	C3(Carbamidomethyl)	ASTEI00574-PA	3	384.521	1151.55	3	2.53	33.06	-1.484	1
									GATAGMSGFVK		ASTEI00574-PA	5	513.257	1025.51	2	1.71	54.11	-2.421	0
									IEMLENVLLDcK	C11(Carbamidomethyl)	ASTEI00574-PA	2	738.876	1476.74	2	2.94	105.2	0.796	0
									KAQVIYENLAQAMPEEEQTIYR		ASTEI00574-PA	1	875.441	2624.31	3	2.09	86.9	2.56	1
									AKVEELKPSLR		ASTEI00574-PA	15	635.371	1269.73	2	2.49	38.96	-14.397	1
									LFLLSIQELNK		ASTEI00574-PA	32	659.393	1317.78	2	2.23	43.8	1.324	0
									AESMEAFQMTEWR		ASTEI00574-PA	2	808.348	1615.69	2	2.59	90.81	0.683	0
									DAIAAIKDEIK		ASTEI00574-PA	8	593.836	1186.66	2	2.35	45.16	-3.358	1
									vFTVEILR	N-Term(iTRAQ4plex)	ASTEI00574-PA	1	560.846	1120.68	2	2.83	32.7	0.685	0
									GQAGLLGNLSHLVAQTK		ASTEI00574-PA	24	853.98	1706.95	2	5.32	98.38	-1.639	0
									DmQLQHGLR	M2(Oxidation)	ASTEI00574-PA	4	557.277	1113.55	2	1.86	48.92	-0.294	0
									KTLNLPQGDR		ASTEI00574-PA	1	571.32	1141.63	2	1.87	53.92	-0.39	1
									EDADEGKEEmEPVDVPmK	M10(Oxidation); M17(Oxidation)	ASTEI00574-PA	1	693.964	2079.88	3	3.06	23.15	2.267	1
									akVEELkPSLR	N-Term(iTRAQ4plex); K2(iTRAQ4plex); K7(iTRAQ4plex)	ASTEI00574-PA	1	851.534	1702.06	2	2.3	33.78	1.645	1
									EAVAMYER		ASTEI00574-PA	2	484.728	968.449	2	1.9	47.89	-1.861	0
									dAIAAIkDEIk	N-Term(iTRAQ4plex); K7(iTRAQ4plex); K11(iTRAQ4plex)	ASTEI00574-PA	2	809.992	1618.98	2	4.93	43.71	2.115	1
									VFTVEILR		ASTEI00574-PA	20	488.795	976.582	2	2.04	39.14	-0.388	0
									VEELKPSLR		ASTEI00574-PA	8	357.545	1070.62	3	1.81	44.97	-1.201	0
									EAVAmYER	M5(Oxidation)	ASTEI00574-PA	1	492.722	984.437	2	1.94	46.14	-9.127	0
									AQVIYENLAQAMPEEEQTIYR		ASTEI00574-PA	12	1248.61	2496.2	2	4.82	108.63	-1.191	0
									DMQLQHGLR		ASTEI00574-PA	9	549.279	1097.55	2	2.25	45.47	-1.818	0
									KTLNLPQGDRR		ASTEI00574-PA	1	433.249	1297.73	3	3.78	43.36	-0.177	2
									lFLLSIQELNk	N-Term(iTRAQ4plex); K11(iTRAQ4plex)	ASTEI00574-PA	1	803.495	1605.98	2	2.55	61.44	0.539	0
									nLLLVAQAk	N-Term(iTRAQ4plex); K9(iTRAQ4plex)	ASTEI00574-PA	2	629.41	1257.81	2	3.28	58.97	-0.127	0
									FSAHAYSVLEDDTADDTVLFGK		ASTEI00574-PA	6	801.045	2401.12	3	1.24	14.49	0.444	0
									TQLAGGGKK		ASTEI00574-PA	1	430.254	859.5	2	1.76	25.3	0.26	1
									GLFGWGGGGANK		ASTEI00574-PA	2	560.78	1120.55	2	2.59	43.2	-0.524	0
									AEVGREDADEGKEEMEPVDVPMK		ASTEI00574-PA	8	640.793	2560.15	4	3.41	34.2	-1.483	2
									QLIATIEGcK	C9(Carbamidomethyl)	ASTEI00574-PA	4	566.804	1132.6	2	1.85	21.32	-1.553	0
									TLNLPQGDRR		ASTEI00574-PA	5	390.551	1169.64	3	2.05	26.61	0.637	1
									GATAGmSGFVK	M6(Oxidation)	ASTEI00574-PA	1	521.255	1041.5	2	2.35	38.21	-0.08	0
									AQVIYENLAQAmPEEEQTIYR	M12(Oxidation)	ASTEI00574-PA	1	1256.6	2512.2	2		30.34	-2.075	0
									EDADEGKEEMEPVDVPMK		ASTEI00574-PA	2	683.3	2047.88	3	2.87	33.92	0.347	1
									NLLLVAQAK		ASTEI00574-PA	10	485.308	969.608	2	1.9	32.04	-1.083	0
									NVTLANLEKPDSDER		ASTEI00574-PA	15	850.927	1700.85	2	4.12	95.35	1.272	0
ASTEI08579-PA	9.78	5	5	8	603	66.774	6.81	Midgut,Brain,Salivary glands
									HVTTDSGPPSEVSTK		ASTEI08579-PA	3	514.586	1541.74	3	4.92	42.26	0.425	0
									AGFDDEELR		ASTEI08579-PA	1	526.238	1051.47	2	2.35	52.15	0.486	0
									AIQQLMANER		ASTEI08579-PA	1	587.305	1173.6	2	2.54	29.16	-1.657	0
									THLTNLPDSDFDK		ASTEI08579-PA	1	501.576	1502.71	3	1.72	37.6	1.098	0
ASTEI08879-PA	34.47	32	32	54	1265	140.724	7.46	Brain,Midgut,Salivary glands,Testis
									GTTLLHYLVQIIEKK		ASTEI08879-PA	1	586.019	1756.04	3	5.85	50.39	2.981	1
									mAPAGPQAPAAPK	M1(Oxidation)	ASTEI08879-PA	2	611.818	1222.63	2	2.74	35.2	2.77	0
									SASAMFDLIR		ASTEI08879-PA	1	555.784	1110.56	2	2.21	68.32	0.05	0
									HLDFFEMVR		ASTEI08879-PA	1	597.292	1193.58	2	1.73	33.99	-0.864	0
									LQGTVWSELDDTK		ASTEI08879-PA	1	746.369	1491.73	2	2.38	54.22	-1.827	0
									AGLAEVNREIEFHR		ASTEI08879-PA	1	547.623	1640.85	3	3.26	20.11	2.322	1
									ILSVIDGR		ASTEI08879-PA	2	436.764	872.52	2		30.46	0.449	0
									KNVPQPANPLK		ASTEI08879-PA	2	402.572	1205.7	3	3.3	26.63	0.908	1
									VLTAMLNYQEYAAER		ASTEI08879-PA	1	886.437	1771.87	2	3.24	89.84	-0.939	0
									EGLLNSVAGK		ASTEI08879-PA	1	494.275	987.544	2	1.63	46.21	-3.469	0
									LQDPDVAPLSIDVRK		ASTEI08879-PA	1	555.979	1665.92	3	3.32	24.36	3.985	1
									GTTLLHYLVQIIEK		ASTEI08879-PA	1	543.32	1627.95	3	3.65	42.78	3.028	0
									ADRFLYEISK		ASTEI08879-PA	1	621.331	1241.65	2	3.13	27.46	2.361	1
									SETGSVASASLK		ASTEI08879-PA	2	568.793	1136.58	2	3.25	56.44	-1.09	0
									EFHAQASVR		ASTEI08879-PA	3	522.765	1044.52	2	1.91	26.36	-0.135	0
									ALLDEHSEDIDSLAR		ASTEI08879-PA	1	561.945	1683.82	3	2.71	64.82	0.407	0
									VSLGEMDKDITMLR		ASTEI08879-PA	1	536.609	1607.81	3	3.19	70.56	0.206	1
									FLYEISK		ASTEI08879-PA	2	450.247	899.486	2	1.62	33.03	-1.323	0
									FAELEDQFQDMK		ASTEI08879-PA	1	750.837	1500.67	2	3	70.6	-0.456	0
									GEFDDLISALR		ASTEI08879-PA	1	618.316	1235.62	2	2.19	53.11	-2.038	0
									AQNcTILLSK	C4(Carbamidomethyl)	ASTEI08879-PA	1	574.311	1147.62	2	2.62	46.17	0.572	0
									TQEKEDLETSLAR		ASTEI08879-PA	2	760.381	1519.75	2	3.02	67.56	-3.92	1
									VVQQLVLQHEERPASDcLDPDAPGVDKR	C17(Carbamidomethyl)	ASTEI08879-PA	1	793.655	3171.6	4	2.58		4.481	1
									FQVTVNDLAPR		ASTEI08879-PA	3	630.341	1259.67	2	2.28	53.46	-0.354	0
									MAPAGPQAPAAPK		ASTEI08879-PA	1	603.82	1206.63	2	2.05	53.25	1.527	0
									TRAEDLERENSEITAR		ASTEI08879-PA	1	630.65	1889.94	3	2.84	14.27	2.549	2
									IESQTALFDALK		ASTEI08879-PA	4	668.362	1335.72	2	3.15	74.91	1.356	0
									LQDPDVAPLSIDVR		ASTEI08879-PA	4	769.417	1537.83	2	3.77	56.5	2.5	0
									FVSEQQER		ASTEI08879-PA	1	511.749	1022.49	2	2.19	50.95	0.745	0
									TGDVFGEDMAK		ASTEI08879-PA	1	585.26	1169.51	2	1.87	48.87	-0.992	0
ASTEI06038-PA	6.44	14	14	29	3307	372.243	5.94	Midgut,Brain,Salivary glands
									VLDIEDYALGQTSLEQVFLFFTK		ASTEI06038-PA	2	669.849	2676.37	4	2.35		-2.943	0
									GLTEGEIAANNLVLR		ASTEI06038-PA	2	785.432	1569.86	2	3.49	91.84	-2.045	0
									IAIMADGELK		ASTEI06038-PA	1	530.788	1060.57	2	2.03	30.2	-1.548	0
									QSAPPTEADDIDSDVR		ASTEI06038-PA	4	858.386	1715.77	2	2.72	23.16	-3.659	0
									VVFcDEPTSGMDPTAR	C4(Carbamidomethyl)	ASTEI06038-PA	3	891.393	1781.78	2	2.52	61.85	-2.548	0
									MLTGDENISAGEAWVK		ASTEI06038-PA	1	860.914	1720.82	2	3.36	30	0.173	0
									AVDQILEPIDVVGFDSGQR		ASTEI06038-PA	1	1029.53	2058.05	2	3.88	103.82	0.365	0
									QSAPPTEADDIDSDVRMEK		ASTEI06038-PA	1	701.988	2103.95	3	4.26	53.22	-0.046	1
									VIGYcPQFDALLEDLTGR	C5(Carbamidomethyl)	ASTEI06038-PA	1	689.68	2067.03	3	0.69		1.917	0
									VVFcDEPTSGmDPTAR	C4(Carbamidomethyl); M11(Oxidation)	ASTEI06038-PA	2	899.392	1797.78	2	2.76	76.43	-1.394	0
									NVPQEIDHYVSVLQLEDKR		ASTEI06038-PA	7	571.3	2282.18	4	2.14	39.43	0.433	1
									SILQERDPTYQFPDVYLSR		ASTEI06038-PA	1	776.394	2327.17	3	2.75	17.79	0.844	1
									ALWDLLIQEK		ASTEI06038-PA	1	614.851	1228.69	2	1.69	34.32	0.787	0
									VVLcDEPTSGMDPSAR	C4(Carbamidomethyl)	ASTEI06038-PA	1	867.396	1733.79	2	3.14	44.86	1.114	0
									LIcVKDDScDSTR	C3(Carbamidomethyl); C9(Carbamidomethyl)	ASTEI06038-PA	1	784.854	1568.7	2	2.84	49	-2.021	1
ASTEI04966-PA	27.81	13	13	39	543	61.607	9.66	Midgut,Thorax,Brain,Proboscis,Antennae,Ovary,Fatbody,Salivary glands,Testis
									NIFAILQSIK		ASTEI04966-PA	3	573.847	1146.69	2	2.52	45.91	-0.97	0
									ENEVLIQR		ASTEI04966-PA	2	500.775	1000.54	2	2.19	69.76	0.48	0
									LLAQNAANKR		ASTEI04966-PA	5	549.822	1098.64	2	2.42	59.17	-0.228	1
									VNRPQPQPTQYNR		ASTEI04966-PA	5	533.278	1597.82	3	2.01	16.82	0.051	0
									RPAESDGLDSLAK		ASTEI04966-PA	1	679.85	1358.69	2	1.72	44.51	1.6	0
									AQQNSLNNNNSTSNNNLSAGmPPGRPK	M21(Oxidation)	ASTEI04966-PA	1	947.784	2841.34	3	2.03	15.83	2.321	0
									aDPLSLLR	N-Term(Acetyl)	ASTEI04966-PA	1	463.77	926.532	2		58.51	1.405	0
									LLAQNAANK		ASTEI04966-PA	3	471.772	942.537	2	2.84	50.03	-0.152	0
ASTEI04448-PA	34	30	30	114	1244	139.136	6.77	Midgut,Brain,Thorax,Proboscis,Fatbody,Ovary,Salivary glands,Male accessory glands,Head,Maxillary palps,Testis
									AALEAMNELDLFGAR		ASTEI04448-PA	3	810.907	1620.81	2	3.51	103.06	1.117	0
									IEcEWPLFFcYLILNK	C3(Carbamidomethyl); C10(Carbamidomethyl)	ASTEI04448-PA	1	1073.03	2145.06	2	3.75	31.42	2.337	0
									VWTVLER		ASTEI04448-PA	4	451.759	902.511	2	1.9	31.7	1.258	0
									GGSGSVIHVLADEAHK		ASTEI04448-PA	2	526.266	1576.78	3	4.39		-15.855	0
									LAEHGIQVQTIADVAPIEVQPAR		ASTEI04448-PA	6	819.115	2455.33	3	6.04	55.54	0.5	0
									tEPQLFHEMLR	N-Term(iTRAQ4plex)	ASTEI04448-PA	1	515.605	1544.8	3	4.14	35.85	-0.423	0
									QVTVGMPPNSEHTITAPLPEMELR		ASTEI04448-PA	3	883.118	2647.34	3	5.32	29.79	6.787	0
									IFAFTPQFSDVNR		ASTEI04448-PA	12	771.389	1541.77	2	2.21	70.35	-3.051	0
									cPFLWGQSLYILGK	C1(Carbamidomethyl)	ASTEI04448-PA	1	841.448	1681.89	2	1.04	11.62	6.313	0
									NLLHHILSGK		ASTEI04448-PA	1	377.892	1131.66	3	1.73	27.98	-0.951	0
									LNPAVQAYLDEHLLR		ASTEI04448-PA	1	584.653	1751.94	3	3.52	65.98	0.408	0
									LLQEGFLAVGELDPLNR		ASTEI04448-PA	4	942.515	1884.02	2	3.69	94.23	-0.265	0
									DVGILSTSK		ASTEI04448-PA	3	460.259	919.511	2	1.68	30.37	1.236	0
									LEEILVK		ASTEI04448-PA	7	422.263	843.519	2	2.19	35.45	0.316	0
									VLPQSLTQEmTPNELK	M10(Oxidation)	ASTEI04448-PA	5	922.476	1843.95	2	2.91	39.92	-0.798	0
									VPLAMIQTMK		ASTEI04448-PA	1	566.316	1131.62	2	2.11	58.08	-1.734	0
									DPSPNTQAQPR		ASTEI04448-PA	1	605.795	1210.58	2	2.58	37.21	1.581	0
									ANQLFLEDQR		ASTEI04448-PA	4	617.315	1233.62	2	3.06	68.89	0.164	0
									aNQLFLEDQR	N-Term(iTRAQ4plex)	ASTEI04448-PA	1	689.367	1377.73	2	3.55	51.08	1.733	0
									LIPELYAVPEEAVAAEYQIPGSQQR		ASTEI04448-PA	8	924.479	2771.42	3	3.51	35.52	-1.104	0
									SQIGIGEPENAEGSLIDDR		ASTEI04448-PA	6	1000.48	1999.96	2	4.21	68.15	-0.293	0
									VLSHLYTYLGR		ASTEI04448-PA	4	661.367	1321.73	2	1.05	22.52	0.957	0
									SINVDSETLGMEGNVTER		ASTEI04448-PA	1	975.96	1950.91	2	2.11	98.03	2.745	0
									SHGDAMLccAK	C8(Carbamidomethyl); C9(Carbamidomethyl)	ASTEI04448-PA	1	625.26	1249.51	2	2.19	18.29	-0.321	0
									AVTDLLVR		ASTEI04448-PA	1	443.773	886.538	2	1.13	32.04	2.961	0
									VLPQSLTQEMTPNELK		ASTEI04448-PA	8	914.479	1827.95	2	1.82	18.05	-0.448	0
									LLQEGFLAVGELDPLNRR		ASTEI04448-PA	4	680.712	2040.12	3	4.26	44.81	-1.351	1
									tEPQLFHEmLR	N-Term(iTRAQ4plex); M9(Oxidation)	ASTEI04448-PA	1	520.937	1560.8	3	4.6	27.14	0.806	0
									aVTDLLVR	N-Term(iTRAQ4plex)	ASTEI04448-PA	1	515.822	1030.64	2	3.9	33.62	-1.077	0
									SNHGQPELNASSIGMAK		ASTEI04448-PA	6	870.922	1740.84	2	1.67	22.32	2.022	0
									SAWQNLLGRPLLTLVLK		ASTEI04448-PA	2	961.585	1922.16	2	2.9	10.41	2.067	0
									GNISIVScK	C8(Carbamidomethyl)	ASTEI04448-PA	1	489.26	977.512	2	2.16	41.71	3.731	0
ASTEI06098-PA	13.99	9	9	41	822	93.748	7.93	Midgut,Brain,Salivary glands,Proboscis,Ovary,Fatbody,Malpighian tubules,Maxillary palps
									TcFVTTAER	C2(Carbamidomethyl)	ASTEI06098-PA	5	542.758	1084.51	2	2.11	32.05	-0.462	0
									LFVQTFK		ASTEI06098-PA	3	441.757	882.507	2	1.72	46.17	-1.097	0
									YVLVSPK		ASTEI06098-PA	2	403.245	805.482	2		38.03	0.022	0
									AELLALLK		ASTEI06098-PA	2	435.787	870.566	2	1.15	37.16	0.25	0
									NQTIPDFTNYEESR		ASTEI06098-PA	12	857.391	1713.78	2	1.68	21.63	2.357	0
									LLTESTVEDIK		ASTEI06098-PA	9	624.339	1247.67	2		28.32	-1.24	0
									VVIVESVLcPTIIK	C9(Carbamidomethyl)	ASTEI06098-PA	1	785.468	1569.93	2	2.65	60.06	0.161	0
									EAVVVPVFcGVQALYAAEAQPLAAESVHNEIR	C9(Carbamidomethyl)	ASTEI06098-PA	1	1146.59	3437.75	3	3.11	58.51	-0.412	0
									lFVQTFk	N-Term(iTRAQ4plex); K7(iTRAQ4plex)	ASTEI06098-PA	1	585.86	1170.71	2	2.86	36.27	-0.379	0
ASTEI01166-PA	4.36	2	2	4	344	39.096	8.35	Brain
									LLFDPNLR		ASTEI01166-PA	3	494.285	987.563	2	1.01	40.73	0.496	0
									IcATMYK	C2(Carbamidomethyl)	ASTEI01166-PA	1	443.712	886.416	2	1.37		-0.104	0
ASTEI01663-PA	10.8	11	11	28	1342	148.684	7.49	Brain
									ILDVTFR		ASTEI01663-PA	2	432.254	863.5	2	1.96	57.25	1.498	0
									AHQcSAYDDVPYDGALLK	C4(Carbamidomethyl)	ASTEI01663-PA	1	674.979	2022.92	3	1.5	20.7	-0.449	0
									QYcNIIDcPVR	C3(Carbamidomethyl); C8(Carbamidomethyl)	ASTEI01663-PA	1	719.334	1437.66	2	2.18	62.12	-0.733	0
									WEVSEWSK		ASTEI01663-PA	1	525.749	1050.49	2	1.53	36.68	1.095	0
									VERPASmcPSSKPPDK	M7(Oxidation); C8(Carbamidomethyl)	ASTEI01663-PA	7	601.291	1801.86	3	2.1	12.55	0.396	0
									WTPHYDYSEPcALTcR	C11(Carbamidomethyl); C15(Carbamidomethyl)	ASTEI01663-PA	1	685.961	2055.87	3	0.77		-0.357	0
									NQEPcNVQEcPK	C5(Carbamidomethyl); C10(Carbamidomethyl)	ASTEI01663-PA	1	751.821	1502.64	2	3.11	47.72	-0.42	0
									EAGIYTcHAGLSHADLK	C7(Carbamidomethyl)	ASTEI01663-PA	1	614.964	1842.88	3	2.56	41.47	-1.209	0
									IVSPFLcSPETKPEAR	C7(Carbamidomethyl)	ASTEI01663-PA	5	610.986	1830.94	3	4.01	43.62	1.063	0
									VERPASMcPSSKPPDK	C8(Carbamidomethyl)	ASTEI01663-PA	4	893.435	1785.86	2	2.91	45.74	0.089	0
									TcNDIPcPPR	C2(Carbamidomethyl); C7(Carbamidomethyl)	ASTEI01663-PA	2	615.274	1229.54	2	2.52	36.62	0.198	0
									IGGAATVFYGTQVK		ASTEI01663-PA	2	706.382	1411.76	2	2.23	58.33	-0.568	0
ASTEI05510-PA	64.67	17	17	140	351	37.98	6.37	Midgut,Brain,Salivary glands,Thorax,Proboscis,Male accessory glands,Antennae,Fatbody,Ovary,Malpighian tubules,Other,Heamolymph,Legs,Maxillary palps,Testis
									LAADEVKDLATSLLNNETVNVDGmK	M24(Oxidation)	ASTEI05510-PA	2	892.797	2676.38	3	3.52	49.91	13.143	1
									SIEQMLEKDISDNR		ASTEI05510-PA	1	559.942	1677.81	3	2.14	36.22	0.438	1
									aGQLQILDQLLLPGESk	N-Term(iTRAQ4plex); K17(iTRAQ4plex)	ASTEI05510-PA	4	704.417	2111.24	3	2.98	34.23	2.155	0
									LTAYELVHDKLPATLVTDSMVAALLNSR		ASTEI05510-PA	11	1014.56	3041.66	3	11.06	97.44	7.467	1
									IAAPGIGcWNPAFDVTPAELITGIITER	C8(Carbamidomethyl)	ASTEI05510-PA	10	994.86	2982.57	3	8.8	76.76	8.741	0
									aIGDNGANALLk	N-Term(iTRAQ4plex); K12(iTRAQ4plex)	ASTEI05510-PA	1	722.916	1444.82	2	2.39	11.22	-8.553	0
									IGTYQMAVVAK		ASTEI05510-PA	8	590.824	1180.64	2	2.73	63.04	0.88	0
									NLLDHVYcTETRPYNQGAR	C8(Carbamidomethyl)	ASTEI05510-PA	4	769.707	2307.11	3	4.05	18.05	6.184	0
									tLEAIKYK	N-Term(Acetyl)	ASTEI05510-PA	2	504.291	1007.58	2		52.03	-2.312	1
									DLATSLLNNETVNVDGmK	M17(Oxidation)	ASTEI05510-PA	2	975.475	1949.94	2	5.59	74.6	-3.324	0
									LTAYELVHDKLPATLVTDSmVAALLNSR	M20(Oxidation)	ASTEI05510-PA	1	765.164	3057.64	4	2.06	20.75	2	1
									LLTHcNTGSLATAGYGTALGVIR	C5(Carbamidomethyl)	ASTEI05510-PA	7	782.746	2346.22	3	1.77	32.01	-0.23	0
									iGTYQMAVVAk	N-Term(iTRAQ4plex); K11(iTRAQ4plex)	ASTEI05510-PA	1	734.926	1468.85	2	4	46.4	0.608	0
									AGQLQILDQLLLPGESK		ASTEI05510-PA	31	912.019	1823.03	2	5.34	83.82	1.546	0
									DLATSLLNNETVNVDGMK		ASTEI05510-PA	6	967.478	1933.95	2	1.44	88.72	-2.383	0
									GVLKPSELAEK		ASTEI05510-PA	11	390.896	1170.67	3	0.76	14.44	1.682	0
									AIGDNGANALLK		ASTEI05510-PA	9	578.819	1156.63	2	1.91	88.53	-1.059	0
									LPATLVTDSMVAALLNSR		ASTEI05510-PA	3	936.515	1872.02	2	4.91	119.14	-1.284	0
									LAADEVKDLATSLLNNETVNVDGMK		ASTEI05510-PA	1	887.459	2660.36	3	5.83	79.88	6.654	1
									gVLkPSELAEk	N-Term(iTRAQ4plex); K4(iTRAQ4plex); K11(iTRAQ4plex)	ASTEI05510-PA	1	534.997	1602.98	3	3.86	19.66	-1.079	0
									ELGEHLQYLVTSRPTAVNLK		ASTEI05510-PA	10	756.754	2268.25	3	6.64		5.558	0
ASTEI01938-PA	2.84	1	1	1	598	67.055	8.76	Fatbody
									NNVTGQLMVDGQRLSER		ASTEI01938-PA	1	639.66	1916.96	3	3.13		1.819	1
ASTEI03261-PA	5.01	1	1	1	479	53.262	7.97	Midgut
									ATLAEQSPDDSTAVQcTSTTAVAK	C16(Carbamidomethyl)	ASTEI03261-PA	1	1226.58	2452.15	2	5.47	86.35	0.909	0
ASTEI03617-PA	89.02	31	31	1455	255	28.647	7.14	Midgut,Brain,Salivary glands,Thorax,Proboscis,Male accessory glands,Antennae,Fatbody,Larvae,Ovary,Pupae,Malpighian tubules,Other,Heamolymph,Legs,Head,Maxillary palps,Testis
									sFDVPPPNmEPDHAYYNAIVk	N-Term(iTRAQ4plex); M9(Oxidation); K21(iTRAQ4plex)	ASTEI03617-PA	6	903.449	2708.33	3	4.78	25.62	2.478	0
									nIIIAAHGNSLR	N-Term(iTRAQ4plex)	ASTEI03617-PA	5	711.919	1422.83	2	4.08	48.18	0.305	0
									HYGGLTGLNK		ASTEI03617-PA	41	530.283	1059.56	2	3.95	50.89	1.107	0
									sFDVPPPNmEPDHAYYNAIVkDER	N-Term(iTRAQ4plex); M9(Oxidation); K21(iTRAQ4plex)	ASTEI03617-PA	1	777.882	3108.51	4	3.25	10.5	2.856	1
									YKDDPKPNEFPMAESLK		ASTEI03617-PA	64	670.328	2008.97	3	5.85	48.46	0.997	1
									YGEDQVLIWRR		ASTEI03617-PA	1	478.919	1434.74	3	2.8	35.16	-4.472	1
									fLGDEETVRk	N-Term(iTRAQ4plex); K10(iTRAQ4plex)	ASTEI03617-PA	1	494.612	1481.82	3	2.59	18.76	1.598	1
									FLGDEETVR		ASTEI03617-PA	54	533.262	1065.52	2	1.81	59.5	-4.13	0
									YGEDQVLIWR		ASTEI03617-PA	112	639.837	1278.67	2		12.91	14.122	0
									hYGGLTGLNk	N-Term(iTRAQ4plex); K10(iTRAQ4plex)	ASTEI03617-PA	5	449.926	1347.76	3	4.55	37.2	0.955	0
									GKEEALAAGK		ASTEI03617-PA	5	487.269	973.53	2	2.49	70.19	-1.246	1
									SFDVPPPNMEPDHAYYNAIVK		ASTEI03617-PA	30	802.046	2404.12	3	1.11		-2.132	0
									NIIIAAHGNSLR		ASTEI03617-PA	125	639.871	1278.73	2	3.2	61.04	5.981	0
									EGKNIIIAAHGNSLR		ASTEI03617-PA	2	531.631	1592.88	3	4.94	45.56	-4.469	1
									fLGDEETVR	N-Term(iTRAQ4plex)	ASTEI03617-PA	2	605.316	1209.62	2	3.39	44.44	1.802	0
									NLFcGWFDANLSDK	C4(Carbamidomethyl)	ASTEI03617-PA	27	843.882	1686.76	2	2.46	43.53	-0.965	0
									AVKEAGLKFDIAHTSLLTR		ASTEI03617-PA	4	518.297	2070.17	4	2.2		-1.841	2
									HGESEWNQK		ASTEI03617-PA	5	557.749	1114.49	2	2.58	32.32	-0.213	0
									sFDVPPPNMEPDHAYYNAIVkDER	N-Term(iTRAQ4plex); K21(iTRAQ4plex)	ASTEI03617-PA	2	773.883	3092.51	4	5.51	14.71	1.937	1
									eSGQTAIPIQk	N-Term(iTRAQ4plex); K11(iTRAQ4plex)	ASTEI03617-PA	3	730.422	1459.84	2	4.43	64.1	0.973	0
									HYGGLTGLNKSETAAK		ASTEI03617-PA	1	549.621	1646.85	3	3.47	30.41	-1.048	1
									ykDDPkPNEFPMAESLk	N-Term(iTRAQ4plex); K2(iTRAQ4plex); K6(iTRAQ4plex); K17(iTRAQ4plex)	ASTEI03617-PA	1	862.466	2585.38	3	5.33	30.08	2.432	1
									gkEEALAAGk	N-Term(iTRAQ4plex); K2(iTRAQ4plex); K10(iTRAQ4plex)	ASTEI03617-PA	1	703.422	1405.84	2	3.24	57.46	-0.672	1
									SFDVPPPNmEPDHAYYNAIVK	M9(Oxidation)	ASTEI03617-PA	8	807.381	2420.13	3	2.26		1.925	0
									eEALAAGk	N-Term(iTRAQ4plex); K8(iTRAQ4plex)	ASTEI03617-PA	1	538.813	1076.62	2	3.71	42.44	0.14	0
									DDPKPNEFPMAESLK		ASTEI03617-PA	2	573.274	1717.81	3	2.91	18.31	-1.022	0
									sFDVPPPNMEPDHAYYNAIVk	N-Term(iTRAQ4plex); K21(iTRAQ4plex)	ASTEI03617-PA	3	898.118	2692.34	3	4.51	40.81	2.394	0
									FLGDEETVRK		ASTEI03617-PA	44	398.544	1193.62	3	2.31	29.64	0.189	1
									TLPYWNDVIIPQLKEGK		ASTEI03617-PA	7	672.029	2014.07	3	3.32	46.24	-14.034	1
									AQVTLDSILKESGQTAIPIQK		ASTEI03617-PA	10	747.42	2240.24	3	1.13		-2.022	1
									SFDVPPPNmEPDHAYYNAIVKDER	M9(Oxidation)	ASTEI03617-PA	46	940.774	2820.31	3	2.89	31.79	4.676	1
									RSFDVPPPNMEPDHAYYNAIVKDER		ASTEI03617-PA	22	740.857	2960.41	4	4.77	25.93	2.181	2
									NLFcGWFDANLSDKGK	C4(Carbamidomethyl)	ASTEI03617-PA	10	936.448	1871.89	2	4.85	95.56	7.942	1
									YKDDPKPNEFPmAESLK	M12(Oxidation)	ASTEI03617-PA	53	1012.99	2024.96	2	2.23	28.43	-0.321	1
									ykDDPkPNEFPmAESLk	N-Term(iTRAQ4plex); K2(iTRAQ4plex); K6(iTRAQ4plex); M12(Oxidation); K17(iTRAQ4plex)	ASTEI03617-PA	4	651.098	2601.37	4	4.64	18.51	0.003	1
									ESGQTAIPIQK		ASTEI03617-PA	47	586.319	1171.63	2	1.98	33.82	-0.85	0
									aIESVANQGk	N-Term(iTRAQ4plex); K10(iTRAQ4plex)	ASTEI03617-PA	1	652.874	1304.74	2	4.53	74.77	-0.201	0
									yGEDQVLIWR	N-Term(iTRAQ4plex)	ASTEI03617-PA	1	711.881	1422.76	2	3.9	45.68	3.417	0
									SFDVPPPNMEPDHAYYNAIVKDER		ASTEI03617-PA	70	701.835	2804.32	4	4.42	10.98	7.542	1
									RSFDVPPPNmEPDHAYYNAIVKDER	M10(Oxidation)	ASTEI03617-PA	9	744.859	2976.41	4	5.94	37.62	6.257	2
									AIESVANQGK		ASTEI03617-PA	22	508.772	1016.54	2	2.11	50.6	-0.054	0
ASTEI08478-PA	3.59	1	1	1	251	28.157	7.84	Brain
									AEIVGPQVK		ASTEI08478-PA	1	470.777	940.547	2	2.2	22.77	0.638	0
ASTEI10857-PA	4.98	1	1	3	201	22.744	6.06	Ovary,Malpighian tubules,Legs
									mYTLLSGFYK	N-Term(Acetyl)	ASTEI10857-PA	3	632.826	1264.64	2		53.24	13.486	0
ASTEI06797-PA	16	3	3	3	200	22.336	4.87	Ovary
									DIETDVEQYGR		ASTEI06797-PA	1	662.805	1324.6	2	3.11	59.04	1.113	0
									ISALIDGNQVR		ASTEI06797-PA	1	593.334	1185.66	2	3.06	51.54	2.322	0
									LATLEQQLDR		ASTEI06797-PA	1	593.826	1186.64	2	2.7	50.56	2.113	0
ASTEI08546-PA	34.32	12	12	63	338	37.643	9.03	Midgut,Brain,Salivary glands,Proboscis,Male accessory glands,Antennae,Fatbody,Ovary,Head,Maxillary palps
									VFLQVQASK		ASTEI08546-PA	6	510.297	1019.59	2	1.61	43.86	-1.281	0
									IIQTEGPVGLYR		ASTEI08546-PA	18	673.374	1345.74	2	2	50.41	-5.078	0
									VLPAVSISYVVYEYTSR		ASTEI08546-PA	1	649.348	1946.03	3	2.78	29.62	1.103	0
									FAAYEQVKR		ASTEI08546-PA	1	556.3	1111.59	2	2.39	52.78	2.538	1
									TGEYSSILDAASK		ASTEI08546-PA	5	671.331	1341.65	2	3.6	87.6	1.323	0
									FAAYEQVK		ASTEI08546-PA	2	478.247	955.488	2	1.71	19.22	-0.704	0
									KTGEYSSILDAASK		ASTEI08546-PA	2	735.372	1469.74	2	1.85	28.53	-7.429	1
									ISDcLQYMLK	C4(Carbamidomethyl)	ASTEI08546-PA	1	635.812	1270.62	2	2.68	35.53	-0.819	0
									IAPESAIK		ASTEI08546-PA	2	414.745	828.482	2	2.12	42.27	-0.368	0
									GNFINVLK		ASTEI08546-PA	5	452.767	904.526	2	2.01	35.41	1.025	0
ASTEI02544-PA	19.89	3	3	24	176	19.437	5.6	Midgut,Male accessory glands
									MPTmEDFLSMLEGMDNLSDEEKEELR	M4(Oxidation)	ASTEI02544-PA	1	1035.79	3105.35	3		93.85	1.654	1
									mPTmEDFLSMLEGMDNLSDEEKEELR	M1(Oxidation); M4(Oxidation)	ASTEI02544-PA	1	1041.12	3121.34	3	1.29		3.079	1
									MPTmEDFLSmLEGMDNLSDEEKEELRAGVLQNAMR	M4(Oxidation); M10(Oxidation)	ASTEI02544-PA	1	1016.21	4061.82	4	1.64		-0.687	2
									mPTMEDFLSMLEGMDNLSDEEKEELRAGVLQNAMR	M1(Oxidation)	ASTEI02544-PA	1	1012.21	4045.83	4	8.56	58.48	0.226	2
									AGVLQNAmR	M8(Oxidation)	ASTEI02544-PA	5	488.255	975.502	2	1.87	42	-1.888	0
									mPTMEDFLSMLEGMDNLSDEEKEELR	M1(Oxidation)	ASTEI02544-PA	1	1035.78	3105.34	3	3.38	26.36	-1.648	1
									mPTmEDFLSmLEGMDNLSDEEkEELR	N-Term(iTRAQ4plex); M1(Oxidation); M4(Oxidation); M10(Oxidation); K22(iTRAQ4plex)	ASTEI02544-PA	1	1142.52	3425.55	3	0.39		2.893	1
									MPTMEDFLSMLEGMDNLSDEEKEELR		ASTEI02544-PA	2	1030.45	3089.35	3	4.93	76.4	0.925	1
									mPTMEDFLSmLEGMDNLSDEEKEELR	M1(Oxidation); M10(Oxidation)	ASTEI02544-PA	1	1041.12	3121.35	3		89.17	3.783	1
									MPTMEDFLSmLEGMDNLSDEEKEELR	M10(Oxidation)	ASTEI02544-PA	1	1035.79	3105.35	3	6.25		1.654	1
									MPTMEDFLSMLEGMDNLSDEEKEELRAGVLQNAMR		ASTEI02544-PA	1	1008.21	4029.84	4	9.63	35.85	-0.429	2
									aGVLQNAMR	N-Term(iTRAQ4plex)	ASTEI02544-PA	1	552.31	1103.61	2	3.98	53.38	0.571	0
									AGVLQNAMR		ASTEI02544-PA	3	480.258	959.508	2	2.31	81.13	-0.858	0
									aGVLQNAmR	N-Term(iTRAQ4plex); M8(Oxidation)	ASTEI02544-PA	2	560.307	1119.61	2	1.98	37.37	1.397	0
									MPTmEDFLSmLEGMDNLSDEEKEELR	M4(Oxidation); M10(Oxidation)	ASTEI02544-PA	2	1041.12	3121.35	3	3.87	76.36	5.074	1
ASTEI02900-PA	20.58	5	5	8	311	34.682	5.36	Midgut,Brain,Antennae,Fatbody
									FPLHAGDDAAK		ASTEI02900-PA	1	381.196	1141.57	3	1.52	28.93	9.448	0
									NNVYPQSDVR		ASTEI02900-PA	1	596.291	1191.58	2	2.28	39.61	-0.467	0
									QDcGEWAIPGGMVDPGEK	C3(Carbamidomethyl)	ASTEI02900-PA	1	973.424	1945.84	2	3.69	27.88	-0.328	0
									VSFVGAYEIR		ASTEI02900-PA	1	570.804	1140.6	2	2.38	59.48	-3.466	0
									LDEEGRPVVHPASGK		ASTEI02900-PA	4	795.917	1590.83	2	3.23	27.06	1.46	0
ASTEI05462-PA	19.85	26	26	56	2076	234.052	6.83	Midgut,Brain,Male accessory glands,Ovary,Malpighian tubules,Salivary glands
									AVYEIYR		ASTEI05462-PA	2	457.243	913.478	2	1.62	39.62	0.489	0
									VAFGSPLFLK		ASTEI05462-PA	3	539.818	1078.63	2	1.74	43.15	-0.034	0
									LALFHGPPGTGK		ASTEI05462-PA	3	398.892	1194.66	3	2.91	26.76	-0.794	0
									EHLEYFGR		ASTEI05462-PA	1	350.838	1050.5	3		28.67	0.308	0
									SESLVHTLSGGMK		ASTEI05462-PA	1	673.341	1345.67	2		27.86	-2.498	0
									TEKPAADSQEVVR		ASTEI05462-PA	2	715.368	1429.73	2	2.81	53.15	0.068	0
									FQATLQEEHK		ASTEI05462-PA	2	615.809	1230.61	2	3	55.94	-0.096	0
									AScTMLDILLQVVK	C3(Carbamidomethyl)	ASTEI05462-PA	1	795.933	1590.86	2	3.92	60.04	-0.014	0
									TSTVYSQDVYSSYQK		ASTEI05462-PA	1	878.405	1755.8	2	3.32	52.87	-2.239	0
									DSVLAFAESSMLFAR		ASTEI05462-PA	1	822.409	1643.81	2	3.06	77.88	0.966	0
									SVSFAVK		ASTEI05462-PA	1	369.214	737.42	2	1.18	38.42	0.808	0
									LLENHSAEDDPSEEDIALDSIR		ASTEI05462-PA	2	823.386	2468.14	3	4.97	69.79	0.164	0
									RDIWDVLLK		ASTEI05462-PA	1	579.338	1157.67	2		33	0.414	1
									DIWDVLLK		ASTEI05462-PA	1	501.287	1001.57	2	1.47	35	0.037	0
									SALANLQTIGIIEK		ASTEI05462-PA	3	735.93	1470.85	2	4.38	92.44	0.012	0
									HGQGYNLWIK		ASTEI05462-PA	2	608.317	1215.63	2		22.55	-0.261	0
									YYAGLPGAIVR		ASTEI05462-PA	1	590.333	1179.66	2		18.7	5.204	0
									KVNTILALLGGPSVVLLDEPTTGVDPK		ASTEI05462-PA	2	916.192	2746.56	3	2.5	43.58	0.464	1
									LVAKPGEETSGQYAIIVK		ASTEI05462-PA	2	635.023	1903.06	3	0.62	13.72	0.851	0
									LLILDEPTSGLDPESR		ASTEI05462-PA	2	877.962	1754.92	2	1.72	96.6	-0.069	0
									ADcVQYIGHPTER	C3(Carbamidomethyl)	ASTEI05462-PA	2	515.909	1545.71	3	1.84		-0.108	0
									TENIPSTR		ASTEI05462-PA	1	459.238	917.469	2	1.48	13.89	0.682	0
ASTEI08470-PA	16.39	14	14	35	1037	116.729	7.68	Midgut,Brain
									GKPGLcDAMNPTK	C6(Carbamidomethyl)	ASTEI08470-PA	1	694.837	1388.67	2	3.13	50.2	-0.161	0
									HSIcIAVK	C4(Carbamidomethyl)	ASTEI08470-PA	1	464.258	927.509	2	1.98	46.94	0.744	0
									LNMQDIQFR		ASTEI08470-PA	3	582.795	1164.58	2	1.88	45.13	-0.529	0
									IPQVSFFSTSPELSNK		ASTEI08470-PA	2	890.959	1780.91	2	2.92	85.88	-0.407	0
									AFEELDDLLSK		ASTEI08470-PA	3	640.323	1279.64	2	2.6	51.05	-1.941	0
									TIPSDHYQVK		ASTEI08470-PA	6	594.307	1187.61	2	1.89	44.16	0.287	0
									GQAKKYVEGEGccWHcFNcTQYQIR	C12(Carbamidomethyl); C13(Carbamidomethyl); C16(Carbamidomethyl); C19(Carbamidomethyl)	ASTEI08470-PA	1	1060.46	3179.37	3	0.25		-0.321	2
									HGISVWPVK		ASTEI08470-PA	2	511.793	1022.58	2		27.33	0.609	0
									KADFIGLSGDR		ASTEI08470-PA	2	393.544	1178.62	3	1.3	26.36	0.602	1
									GKPGLcDAmNPTK	C6(Carbamidomethyl); M9(Oxidation)	ASTEI08470-PA	5	468.891	1404.66	3	3.04	32.75	-1.112	0
									SPNDETHcVNcPR	C8(Carbamidomethyl); C11(Carbamidomethyl)	ASTEI08470-PA	3	793.327	1585.65	2	4.59	73.88	-1.397	0
									DSGVADTIAYDNIVLK		ASTEI08470-PA	1	847.436	1693.87	2	2.95	44.27	0.243	0
									VGEYYQGELR		ASTEI08470-PA	3	607.296	1213.58	2	2.22	53.92	-0.441	0
									YPNSPYTPYNK		ASTEI08470-PA	1	672.317	1343.63	2	1.69	34.98	0.26	0
									AIVDIVQK		ASTEI08470-PA	1	443.274	885.541	2	1.51	44.67	0.84	0
ASTEI02167-PA	22.41	15	15	41	781	86.845	7.59	Midgut,Thorax,Brain,Ovary,Fatbody,Other,Malpighian tubules,Salivary glands,Male accessory glands,Testis
									VLEQLLK		ASTEI02167-PA	3	421.771	842.536	2	1.72	33.47	1.199	0
									vLEQLLk	N-Term(iTRAQ4plex); K7(iTRAQ4plex)	ASTEI02167-PA	1	565.873	1130.74	2	3.11	37.37	0.709	0
									iDADITkPVIIDLk	N-Term(iTRAQ4plex); K7(iTRAQ4plex); K14(iTRAQ4plex)	ASTEI02167-PA	2	662.746	1986.22	3	4.03	23.41	0.74	0
									SAMLDLLK		ASTEI02167-PA	5	445.756	890.504	2	1.57	47.92	2.962	0
									VSFDQEEDRFDEDENSFR		ASTEI02167-PA	1	755.316	2263.93	3	3.26	42.62	-1.428	1
									SAMLDLLKK		ASTEI02167-PA	1	509.801	1018.6	2	2.04	34.31	-1.065	1
									TFSPILETDDTNPFLEAGEKTK		ASTEI02167-PA	1	818.407	2453.21	3	4.8	30.67	-0.197	1
									KADVEPELK		ASTEI02167-PA	2	514.784	1028.56	2	2.45	61.34	-1.313	1
									KALQWLR		ASTEI02167-PA	1	457.782	914.557	2	2.93	46.3	-0.307	1
									IDADITKPVIIDLK		ASTEI02167-PA	2	777.461	1553.91	2	2.05	67.32	-0.161	0
									ALSGLcVGIASLSLPVYLGETVQPEVR	C6(Carbamidomethyl)	ASTEI02167-PA	1	943.513	2828.52	3	5.57	70.36	0.203	0
									MSSVANIKPLSFNM		ASTEI02167-PA	1	769.887	1538.77	2	1.29	26.45	-2.429	0
									TAVPFVR		ASTEI02167-PA	4	395.235	789.462	2	1.43	20.39	0.293	0
									SLEDIER		ASTEI02167-PA	8	431.219	861.431	2	1.84	32.88	-0.236	0
									ADVEPELK		ASTEI02167-PA	2	450.738	900.468	2	1.77	41.2	0.601	0
									tAVPFVR	N-Term(iTRAQ4plex)	ASTEI02167-PA	1	467.285	933.562	2	2.59	17.26	-1.727	0
									TFSPILETDDTNPFLEAGEK		ASTEI02167-PA	3	1112.54	2224.06	2	4.34	100.83	-1.304	0
									VSFDQEEDRFDEDENSFRK		ASTEI02167-PA	2	598.764	2392.03	4	2.91	19.56	0.251	2
ASTEI07540-PA	12.77	7	7	21	869	96.209	7.83	Salivary glands,Midgut
									IINSLSHAIDHISIR		ASTEI07540-PA	4	563.652	1688.94	3	1.03	75.38	-1.29	0
									gTVLGVFR	N-Term(iTRAQ4plex)	ASTEI07540-PA	1	496.803	992.599	2	2.48	27.56	-1.573	0
									KNDNQLYGYLADSIK		ASTEI07540-PA	2	581.297	1741.88	3	1.23	21.62	0.276	1
									FSAVENLSQK		ASTEI07540-PA	1	561.795	1122.58	2	2.75	46.92	3.711	0
									NDNQLYGYLADSIK		ASTEI07540-PA	2	807.393	1613.78	2	2.39	78.56	-1.094	0
									SAVSAPSHNIASNLKPVPQHAK		ASTEI07540-PA	6	451.448	2253.21	5	1.35		0.423	0
									QFQVWIGAPER		ASTEI07540-PA	2	665.85	1330.69	2	1.83	62.82	1.317	0
									GTVLGVFR		ASTEI07540-PA	3	424.753	848.498	2	1.07	50.08	-0.963	0
ASTEI09540-PA	59.44	16	16	194	360	41.43	5.72	Midgut,Brain,Salivary glands,Proboscis,Male accessory glands,Antennae,Fatbody,Ovary,Malpighian tubules,Heamolymph,Maxillary palps,Testis
									iIEANNLQETITLVk	N-Term(iTRAQ4plex); K15(iTRAQ4plex)	ASTEI09540-PA	3	994.088	1987.17	2	5.37	52.98	0.341	0
									eIDLYTVk	N-Term(iTRAQ4plex); K8(iTRAQ4plex)	ASTEI09540-PA	3	634.871	1268.73	2	3.41	49.77	0.296	0
									QTVFYFDDYLTVK		ASTEI09540-PA	1	819.912	1638.82	2	2.95	44.38	7.709	0
									NDFVQALVTYFNVEFTK		ASTEI09540-PA	1	1018.01	2035.02	2	2.25	40.46	0.993	0
									LAFSTSPDAAYTHWK		ASTEI09540-PA	28	847.913	1694.82	2	4.79	84.93	0.983	0
									VIAIEcSNIIDYAQK	C6(Carbamidomethyl)	ASTEI09540-PA	12	868.947	1736.89	2	0.82		-1.391	0
									KEDLEFESPFHLLVK		ASTEI09540-PA	15	610.992	1830.96	3	5.22	45.69	-0.73	1
									INWWDDVYGFNMSSIR		ASTEI09540-PA	3	1001.96	2002.91	2	3.82	91.97	-2.388	0
									KGEEIYGTFK		ASTEI09540-PA	10	586.303	1171.6	2	5.27	54.3	-0.207	1
									DTGMMFPDR		ASTEI09540-PA	3	535.225	1069.44	2	2.34	45.87	-1.085	0
									IIEANNLQETITLVK		ASTEI09540-PA	27	849.985	1698.96	2	5.84	123.04	-0.521	0
									KVAISEPLVDVVDPK		ASTEI09540-PA	16	536.978	1608.92	3	1.51	12.49	-1.24	1
									EIDLYTVK		ASTEI09540-PA	8	490.769	980.53	2	2.29	32.08	0.532	0
									cTLFVTAIEDR	C1(Carbamidomethyl)	ASTEI09540-PA	5	662.832	1324.66	2	3.7	62.03	-0.616	0
									QIVTTSYMVK		ASTEI09540-PA	10	585.315	1169.62	2	1.57	28.61	-0.983	0
									VEEVTLPDGcDK	C10(Carbamidomethyl)	ASTEI09540-PA	2	681.314	1361.62	2	2.83	59.96	-3.841	0
									IVLDIGcGTGILSMFAAK	C7(Carbamidomethyl)	ASTEI09540-PA	2	933.495	1865.98	2	4.19	91.29	-1.814	0
									kEDLEFESPFHLLVk	N-Term(iTRAQ4plex); K1(iTRAQ4plex); K15(iTRAQ4plex)	ASTEI09540-PA	2	755.098	2263.28	3	5.98	38.99	4.652	1
									DTGmmFPDR	M4(Oxidation); M5(Oxidation)	ASTEI09540-PA	1	551.219	1101.43	2	1.97	17.43	-2.238	0
									kGEEIYGTFk	N-Term(iTRAQ4plex); K1(iTRAQ4plex); K10(iTRAQ4plex)	ASTEI09540-PA	1	802.457	1603.91	2	3.49	47.94	0.891	1
									QIVTTSYmVK	M8(Oxidation)	ASTEI09540-PA	2	593.311	1185.61	2	2.15	48.58	-3.373	0
									IVLDIGcGTGILSmFAAK	C7(Carbamidomethyl); M14(Oxidation)	ASTEI09540-PA	1	941.493	1881.98	2	3.5	93.5	-1.173	0
ASTEI051573-PA	45.45	7	7	114	121	13.464	9.63	Midgut,Brain,Salivary glands,Proboscis,Male accessory glands,Antennae,Fatbody,Larvae,Ovary,Pupae,Malpighian tubules,Other,Legs,Head,Maxillary palps,Testis
									mEVEFVDAk	N-Term(Acetyl); K9(iTRAQ4plex)	ASTEI051573-PA	1	627.315	1253.62	2		41.01	2.191	0
									mEVEFVDAK	N-Term(Acetyl)	ASTEI051573-PA	23	555.265	1109.52	2		20.34	3.257	0
									VPVDTTLQALKTEVQK		ASTEI051573-PA	2	590.67	1769.99	3	4.86	52.53	-3.065	1
									mEVEFVDAKSSK	N-Term(Acetyl); M1(Oxidation)	ASTEI051573-PA	4	714.34	1427.67	2		48.09	0.042	1
									vPVDTTLQALkTEVQk	N-Term(iTRAQ4plex); K11(iTRAQ4plex); K16(iTRAQ4plex)	ASTEI051573-PA	2	734.775	2202.31	3	3.33	11.9	1.926	1
									DLGPQISWK		ASTEI051573-PA	22	522.281	1043.55	2	1.9	62.64	1.734	0
									lkPALTVHR	N-Term(iTRAQ4plex); K2(iTRAQ4plex)	ASTEI051573-PA	2	661.93	1322.85	2	2.62	17.66	1.218	0
									TLNVASGAK		ASTEI051573-PA	3	430.745	860.483	2	1.68	14.59	-0.877	0
									LKPALTVHR		ASTEI051573-PA	3	517.827	1034.65	2	1.45	16.39	-1.015	0
ASTEI03736-PA	37.96	7	7	28	274	31.533	6.42	Midgut,Salivary glands,Ovary,Fatbody
									VLVSAHPYFLDYTNHGQLAQR		ASTEI03736-PA	1	810.418	2429.24	3	7.37	63.97	1.556	0
									LLSTEGLEQDK		ASTEI03736-PA	4	616.821	1232.63	2	2.12	46.39	-1.223	0
									lFLNAPNLVVDEQHVTEAk	N-Term(iTRAQ4plex); K19(iTRAQ4plex)	ASTEI03736-PA	2	809.117	2425.34	3	4.25	58.11	1.419	0
									ScAFTHDLEHLR	C2(Carbamidomethyl)	ASTEI03736-PA	1	495.902	1485.69	3	3.74	35.52	-0.064	0
									STPTGNPPVHQITDTSDKR		ASTEI03736-PA	8	684.344	2051.02	3	4.86	27.93	1.752	1
									LFLNAPNLVVDEQHVTEAK		ASTEI03736-PA	6	713.049	2137.13	3	5.46	71.87	1.251	0
									lGLFkPR	N-Term(iTRAQ4plex); K5(iTRAQ4plex)	ASTEI03736-PA	1	373.581	1118.73	3	1.63		0.598	0
									TSIATLLATVPELTK		ASTEI03736-PA	5	779.46	1557.91	2	1.66	66.73	1.702	0
ASTEI03480-PA	51.71	9	9	63	234	27.196	8.06	Midgut,Salivary glands,Brain,Proboscis,Antennae,Ovary,Pupae,Fatbody,Malpighian tubules,Other,Legs
									GLDFFEHDLLANGK		ASTEI03480-PA	2	788.395	1575.78	2	4.45	69.24	1.2	0
									RPFLAGDTISIADLSAAcEIEQVK	C18(Carbamidomethyl)	ASTEI03480-PA	5	868.784	2604.34	3	4.03	53.42	1.493	0
									gLDFFEHDLLANGk	N-Term(iTRAQ4plex); K14(iTRAQ4plex)	ASTEI03480-PA	1	622	1863.99	3	4.86	32.86	0.667	0
									TNPYYDEAHK		ASTEI03480-PA	1	413.188	1237.55	3	2.11	41.92	1.844	0
									IDEYLSWQHLNIR		ASTEI03480-PA	5	562.962	1686.87	3	5.47	45.98	7.138	0
									LYYDFMSQPSR		ASTEI03480-PA	6	703.823	1406.64	2	1.26	37.94	-1.5	0
									VPcIVEQDFR	C3(Carbamidomethyl)	ASTEI03480-PA	13	631.815	1262.62	2	3.13	53.94	1.51	0
									LAESVAIYR		ASTEI03480-PA	5	511.288	1021.57	2	2.42	50.77	1.816	0
									LYYDFmSQPSR	M6(Oxidation)	ASTEI03480-PA	1	711.823	1422.64	2	1.65	25.65	1.92	0
ASTEI05247-PA	76.61	25	25	626	419	45.513	6.64	Midgut,Brain,Salivary glands,Thorax,Proboscis,Male accessory glands,Antennae,Fatbody,Larvae,Ovary,Malpighian tubules,Other,Heamolymph,Legs,Head,Maxillary palps,Testis
									LVSSNEIEPPPHSVFPSDQAADVVRK		ASTEI05247-PA	4	705.367	2818.45	4	3.3	15.76	3.04	1
									QVSIETPAPK		ASTEI05247-PA	8	535.298	1069.59	2	2.74	85.15	0.059	0
									iAAQHFYTPATk	N-Term(iTRAQ4plex); K12(iTRAQ4plex)	ASTEI05247-PA	2	818.459	1635.91	2	4.03	37.85	1.037	0
									vILYPYEGVPHGYSELmVVPDLk	N-Term(iTRAQ4plex); M17(Oxidation); K23(iTRAQ4plex)	ASTEI05247-PA	4	974.858	2922.56	3	3.69	49.12	1.316	0
									THDAcDGLVDIVIDFGTTSR	C5(Carbamidomethyl)	ASTEI05247-PA	1	1096.54	2192.06	2	3.09	15.66	15.227	0
									ILVVYAGAcYR	C9(Carbamidomethyl)	ASTEI05247-PA	1	642.842	1284.68	2		27.53	-0.869	0
									iVDDLLk	N-Term(iTRAQ4plex); K7(iTRAQ4plex)	ASTEI05247-PA	2	552.349	1103.69	2	2.52	36.05	-1.118	0
									vNIVQWNEDLYEk	N-Term(iTRAQ4plex); K13(iTRAQ4plex)	ASTEI05247-PA	1	969.514	1938.02	2	2.29	17.02	-0.053	0
									LKDcVLNLVVPVPDTPVQGAR	C4(Carbamidomethyl)	ASTEI05247-PA	33	764.09	2290.26	3	2.27	26.21	-1.466	1
									vILYPYEGVPHGYSELMVVPDLk	N-Term(iTRAQ4plex); K23(iTRAQ4plex)	ASTEI05247-PA	3	727.397	2906.57	4	1.62	16.95	2.005	0
									DEGFLVAK		ASTEI05247-PA	8	439.734	878.46	2	1.7	17.94	-1.553	0
									NQSTSISSISSQLSDTGDITTSLHLLAK		ASTEI05247-PA	1	968.84	2904.51	3	6.76	99.65	8.622	0
									IVDDLLK		ASTEI05247-PA	22	408.248	815.489	2	2.39	45.5	2.184	0
									VNIVQWNEDLYEK		ASTEI05247-PA	66	825.414	1649.82	2	2.94	40.15	2.024	0
									VILYPYEGVPHGYSELmVVPDLK	M17(Oxidation)	ASTEI05247-PA	38	878.793	2634.36	3	1.87	24.49	4.922	0
									DcVLNLVVPVPDTPVQGAR	C2(Carbamidomethyl)	ASTEI05247-PA	2	1025.05	2049.09	2	4.88	42.47	2.52	0
									SmQcLTK	M2(Oxidation); C4(Carbamidomethyl)	ASTEI05247-PA	1	442.204	883.401	2	1.66	31.86	-0.01	0
									IQITVASLRDEGFLVAK		ASTEI05247-PA	5	620.695	1860.07	3	2.65	27.85	6.745	1
									IAAQHFYTPATK		ASTEI05247-PA	6	449.909	1347.71	3	3.88	42.76	4.053	0
									DKIQITVASLR		ASTEI05247-PA	1	622.373	1243.74	2	2.46	46.24	0.837	1
									VILYPYEGVPHGYSELMVVPDLK		ASTEI05247-PA	55	873.461	2618.37	3	1.82	12.36	3.592	0
									SMQcLTK	C4(Carbamidomethyl)	ASTEI05247-PA	1	434.206	867.406	2	1.53	34.42	-0.947	0
									YLIPIPDELSLSVAATLPTGALLAQSAIIAAHK		ASTEI05247-PA	7	1119.98	3357.93	3	7.92	59.21	8.086	0
									DGALFPGFEVAGVIESLGSELKPDcGFKVGQR	C25(Carbamidomethyl)	ASTEI05247-PA	1	845.679	3379.69	4	8.77	62.49	-1.425	1
									GGHIFISDEVAEKLLPK		ASTEI05247-PA	3	927.012	1853.02	2	2.86	41.34	0.434	1
									ILIVGTGGLALWAVR		ASTEI05247-PA	9	769.975	1538.94	2	1.34	18.52	0.567	0
ASTEI04246-PA	22.27	28	28	48	1446	161.865	6.52	Midgut,Salivary glands,Ovary,Fatbody
									LSTSVTcPVFK	C7(Carbamidomethyl)	ASTEI04246-PA	3	619.827	1238.65	2	2.78	36.41	0.657	0
									DSSLDEIELQDVKPIK		ASTEI04246-PA	2	914.982	1828.96	2	6.08	100	1.182	0
									NVSLTYEGAR		ASTEI04246-PA	1	555.283	1109.56	2		20.65	-0.184	0
									FIVQVTTK		ASTEI04246-PA	1	468.281	935.556	2	1.79	52.46	-0.526	0
									APVQLVAK		ASTEI04246-PA	1	413.263	825.52	2	2.62	39.62	0.472	0
									TPILASYIIELK		ASTEI04246-PA	2	680.91	1360.81	2	4.27	58.22	2.931	0
									LSVVQFDPDNFDLK		ASTEI04246-PA	4	818.912	1636.82	2	1.4	34.37	-3.634	0
									KIEDVYDLSK		ASTEI04246-PA	1	605.321	1209.64	2	3.45	61.29	-0.534	1
									FANLEPPPAAR		ASTEI04246-PA	3	591.816	1182.62	2	3.38	41.23	-1.253	0
									mEEEELEVYGSGYK	M1(Oxidation)	ASTEI04246-PA	1	839.863	1678.72	2	3.84	84.06	1.704	0
									VLSDSMEFVPLPMGK		ASTEI04246-PA	1	825.42	1649.83	2	3.95	30.62	3.462	0
									FNGEDKELTEENKGER		ASTEI04246-PA	1	632.297	1894.88	3		14.38	0.043	2
									ISIFPTYLSYDSVWPVR		ASTEI04246-PA	1	1022.04	2043.07	2	3.78	93.86	6.926	0
									ISLDAAQVcFIEPEK	C9(Carbamidomethyl)	ASTEI04246-PA	1	860.44	1719.87	2	3.51	83.41	6.356	0
									VITLALR		ASTEI04246-PA	1	393.265	785.522	2	1.79	46.99	-3.329	0
									kLVVLPFRk	N-Term(iTRAQ4plex); K1(iTRAQ4plex); K9(iTRAQ4plex)	ASTEI04246-PA	1	383.766	1532.04	4	1.85		0.332	2
									MEEEELEVYGSGYK		ASTEI04246-PA	1	831.865	1662.72	2	4.52	96.28	1.305	0
									TLSVVSR		ASTEI04246-PA	1	381.23	761.452	2	1.79	48.57	0.287	0
									VIPDADPATR		ASTEI04246-PA	3	527.78	1054.55	2	1.47	47.06	-0.954	0
									IPEEDVENQPDVQIQSNK		ASTEI04246-PA	4	1041.5	2082	2	1.52	38.57	0.783	0
									LGNSLLLR		ASTEI04246-PA	1	443.279	885.551	2	2.85	83.73	-0.331	0
									tPILASYIIELk	N-Term(iTRAQ4plex); K12(iTRAQ4plex)	ASTEI04246-PA	1	550.342	1649.01	3	3.21	33.37	-0.306	0
									SLVTGGANVLK		ASTEI04246-PA	2	529.814	1058.62	2	2.2	38.4	0.383	0
									VYcVVMDAEEIcNK	C3(Carbamidomethyl); C12(Carbamidomethyl)	ASTEI04246-PA	1	865.383	1729.76	2	3.1	30.45	-0.93	0
									KAPVQLVAK		ASTEI04246-PA	1	477.31	953.613	2	3.05	50.82	-0.935	1
									LEcVASYR	C3(Carbamidomethyl)	ASTEI04246-PA	1	499.242	997.476	2	1.95	49.71	-1.056	0
									DALLISFPDAK		ASTEI04246-PA	1	595.326	1189.64	2	1.75	63.83	-1.105	0
									LLLYDIIEVVPEPGKPLTK		ASTEI04246-PA	3	713.096	2137.27	3	5.47	29.86	9.803	0
									IEDEEDLLYGESGR		ASTEI04246-PA	2	812.87	1624.73	2	4.32	83.63	-0.269	0
ASTEI04589-PA	47.71	38	38	173	1006	115.86	6.27	Midgut,Brain,Salivary glands,Proboscis,Fatbody,Larvae,Ovary,Pupae,Malpighian tubules,Male accessory glands,Heamolymph,Legs,Maxillary palps
									GGVLHAHDTAIGSTELIVR		ASTEI04589-PA	4	649.354	1946.05	3	3.3	26.28	1.199	0
									IGHGYALLK		ASTEI04589-PA	1	486.286	971.564	2	2.17	37.87	-3.018	0
									TKPTADGEWR		ASTEI04589-PA	2	580.788	1160.57	2	2.21	51.6	-1.171	0
									AAEAIFDR		ASTEI04589-PA	2	446.73	892.452	2	1.94	50.78	-0.39	0
									SWNDFIDAK		ASTEI04589-PA	1	548.26	1095.51	2	1.42	45.21	1.063	0
									DINDVWR		ASTEI04589-PA	1	459.228	917.448	2	1.81	30.91	0.95	0
									GLLPTLYDLDGNTYTPEDVVEIYR		ASTEI04589-PA	1	1378.69	2756.38	2	4.9	105.15	3.769	0
									NHPAAILLASNFPLVVSSDDPSFWR		ASTEI04589-PA	5	918.475	2753.41	3	1.84	29.42	1.994	0
									SSMGDQAYDEAIR		ASTEI04589-PA	3	721.817	1442.63	2	2.66	72.99	4.097	0
									IADDQTVDQYLK		ASTEI04589-PA	10	704.85	1408.69	2	2.15	92.68	-1.4	0
									HPVVLEEIK		ASTEI04589-PA	2	532.31	1063.61	2	3.32	50.1	-1.147	0
									mFTLYTk	N-Term(iTRAQ4plex); K7(iTRAQ4plex)	ASTEI04589-PA	1	596.338	1191.67	2	2.51	47.53	0.324	0
									YSLMNEQDKR		ASTEI04589-PA	3	642.306	1283.61	2	0.98	50.36	0.471	1
									FcDDSTFDGYLTLVQK	C2(Carbamidomethyl)	ASTEI04589-PA	2	954.94	1908.87	2	1.44	28.34	2.612	0
									KYSPEDIVQMYVDQSEK		ASTEI04589-PA	2	686.996	2058.97	3	4.18	16.8	1.801	1
									RDENLIDAILLGTK		ASTEI04589-PA	2	785.945	1570.88	2	3.23	57.16	1.677	1
									HFFEmLER	M5(Oxidation)	ASTEI04589-PA	1	562.763	1124.52	2		29.98	-0.923	0
									GVENPYELVSAR		ASTEI04589-PA	15	667.341	1333.67	2	3.19	74.62	-0.627	0
									RDENLIDAILLGTKR		ASTEI04589-PA	2	576.332	1726.98	3	3.77	41.85	-0.17	2
									DQDIcVEINPVSNQVLK	C5(Carbamidomethyl)	ASTEI04589-PA	1	985.996	1970.98	2	5.13	28.05	-0.051	0
									LLTLPPAINFFFHAGETNWAGR		ASTEI04589-PA	9	824.766	2472.28	3	4.06	20.74	0.194	0
									FmALFIcFEPmVTYRPVWEEYFYGcLEELLADNVTYLEFR	M2(Oxidation); C7(Carbamidomethyl); M11(Oxidation); C25(Carbamidomethyl)	ASTEI04589-PA	1	1698.46	5093.35	3	0.1		-0.997	0
									DENLIDAILLGTK		ASTEI04589-PA	4	707.893	1414.78	2	3	63.18	-0.349	0
									YSLmNEQDKR	M4(Oxidation)	ASTEI04589-PA	1	650.307	1299.61	2	2.48	49.07	5.975	1
									INASPLFK		ASTEI04589-PA	1	445.259	889.511	2	2.37	51.08	-3.103	0
									ATRHEHLWQR		ASTEI04589-PA	2	667.346	1333.68	2	2.77	24.86	-2.264	1
									TLYELVPK		ASTEI04589-PA	5	481.781	962.554	2	1.3		-1.679	0
									DENLIDAILLGTKR		ASTEI04589-PA	2	785.944	1570.88	2	4.26	90.37	0.123	1
									SPLFQFIR		ASTEI04589-PA	2	504.288	1007.57	2	1.48	51.03	1.138	0
									hPVVLEEIk	N-Term(iTRAQ4plex); K9(iTRAQ4plex)	ASTEI04589-PA	1	451.277	1351.82	3	4.2	14.54	-0.637	0
									LFSLYEEDPQR		ASTEI04589-PA	6	698.841	1396.67	2	1.79	42.1	-0.18	0
									iADDQTVDQYLk	N-Term(iTRAQ4plex); K12(iTRAQ4plex)	ASTEI04589-PA	1	848.953	1696.9	2	3.32	74.69	-0.745	0
									FIYAPLK		ASTEI04589-PA	2	426.254	851.5	2	1.76	48.39	-3.119	0
									iNASPLFk	N-Term(iTRAQ4plex); K8(iTRAQ4plex)	ASTEI04589-PA	1	589.362	1177.72	2	3.09	53.12	-0.551	0
									SSMGDQAYDEAIRR		ASTEI04589-PA	2	799.865	1598.72	2	2.7	38.87	-0.303	1
									gVENPYELVSAR	N-Term(iTRAQ4plex)	ASTEI04589-PA	1	739.391	1477.78	2	2.94	44.38	-0.987	0
									QVcIELNPISNQVLK	C3(Carbamidomethyl)	ASTEI04589-PA	2	877.977	1754.95	2	4.3	61.38	-0.59	0
									kYSPEDIVQMYVDQSEk	N-Term(iTRAQ4plex); K1(iTRAQ4plex); K17(iTRAQ4plex)	ASTEI04589-PA	1	831.098	2491.28	3	4.12	40.63	1.621	1
									YSPEDIVQMYVDQSEK		ASTEI04589-PA	2	965.942	1930.88	2	3.96	63.08	1.706	0
									GLLPPVYDLDDR		ASTEI04589-PA	12	686.86	1372.71	2	2.25	67.35	1.134	0
									HFFEMLER		ASTEI04589-PA	3	554.776	1108.55	2	2.3	22.4	19.033	0
									GLGADLVLSADEQR		ASTEI04589-PA	10	722.376	1443.74	2	4.35	60.66	0.974	0
									SSmGDQAYDEAIR	M3(Oxidation)	ASTEI04589-PA	2	729.811	1458.62	2	2.95	75.52	-0.747	0
									TITEEFK		ASTEI04589-PA	1	434.232	867.456	2	1.19		11.665	0
									rDENLIDAILLGTk	N-Term(iTRAQ4plex); K14(iTRAQ4plex)	ASTEI04589-PA	3	930.048	1859.09	2	2.81	29.61	2.586	1
ASTEI05378-PA	24.82	22	22	47	1257	142.54	7.66	Midgut,Brain,Male accessory glands,Ovary,Malpighian tubules,Salivary glands,Testis
									TAIVTLGHIAYNLPEK		ASTEI05378-PA	1	870.487	1739.97	2	1.24	57.84	-1.162	0
									aDITYPAGcRPINEDLGQDELIR	N-Term(Acetyl); C9(Carbamidomethyl)	ASTEI05378-PA	3	886.766	2658.28	3		11.26	-0.367	0
									VYAPEAPYKDQDQIK		ASTEI05378-PA	3	588.964	1764.88	3	1.32	29.05	-1.457	1
									AFIELQK		ASTEI05378-PA	3	424.747	848.488	2	1.73	29.66	-0.16	0
									YLSDTNVPLATK		ASTEI05378-PA	1	661.353	1321.7	2	2.41	83.67	-0.72	0
									lYQLLGTIDDNATk	N-Term(iTRAQ4plex); K14(iTRAQ4plex)	ASTEI05378-PA	1	618.347	1853.03	3	1.37		0.568	0
									FYDIAVPIR		ASTEI05378-PA	1	547.304	1093.6	2	1.88	54.41	-2.948	0
									tAIVTLGHIAYNLPEk	N-Term(iTRAQ4plex); K16(iTRAQ4plex)	ASTEI05378-PA	1	676.73	2028.18	3	4.59	40.06	1.422	0
									EVIEEVSLPTDSAGER		ASTEI05378-PA	3	865.925	1730.84	2	4.28	67.21	-1.189	0
									ALIESHPAILK		ASTEI05378-PA	3	397.908	1191.71	3	1.72	29.12	-0.574	0
									DLQIVSESEDLLEFVK		ASTEI05378-PA	2	932.482	1863.96	2	2.36	29.96	-0.865	0
									DIIDTLR		ASTEI05378-PA	4	423.24	845.472	2	0.75	30.64	-0.706	0
									LTFYDMR		ASTEI05378-PA	2	473.229	945.45	2	1.39	36.27	0.297	0
									LYQLLGTIDDNATK		ASTEI05378-PA	2	782.914	1564.82	2	1.41		-1.214	0
									KGDLLEQGGALSAAEK		ASTEI05378-PA	1	793.922	1586.84	2	5.53	42.93	-0.598	1
									SNIETDVNR		ASTEI05378-PA	1	524.256	1047.51	2	2.08	29.53	-1.1	0
									ETDQNLFNQIK		ASTEI05378-PA	3	675.337	1349.67	2	2.54	78.71	-1.551	0
									YYIPDDMYNLTDR		ASTEI05378-PA	1	839.875	1678.74	2	2.02	56.29	1.137	0
									LLITcLVPYQLPAEER	C5(Carbamidomethyl)	ASTEI05378-PA	4	958.022	1915.04	2	2.75	47.1	0.377	0
									IPSMYFQAQPEDFHNTR		ASTEI05378-PA	1	694.323	2080.95	3	2.25	99.65	-0.786	0
									MFSEPGSTLAR		ASTEI05378-PA	2	598.292	1195.58	2	2.2	41.56	-0.381	0
									AQEFLLK		ASTEI05378-PA	1	424.748	848.488	2	1.85		0.343	0
									aLIESHPAILk	N-Term(iTRAQ4plex); K11(iTRAQ4plex)	ASTEI05378-PA	1	493.976	1479.91	3	3.55	25.43	-1.18	0
									aDITYPAGcRPINEDLGQDELIRR	N-Term(Acetyl); C9(Carbamidomethyl)	ASTEI05378-PA	1	938.799	2814.38	3		11.52	-0.493	1
									EFAIAGTPK		ASTEI05378-PA	1	467.255	933.503	2	2.17	36.49	-1.227	0
ASTEI06074-PA	3.13	1	1	1	319	35.9	4.97	Midgut
									aELNATQMAR	N-Term(Acetyl)	ASTEI06074-PA	1	573.783	1146.56	2		37.54	0.578	0
ASTEI05294-PA	43.35	7	7	37	233	25.966	5.05	Midgut,Brain,Proboscis,Salivary glands
									AIFTNIR		ASTEI05294-PA	3	417.745	834.483	2	0.96	28.5	-0.352	0
									LLVGLHENR		ASTEI05294-PA	6	525.806	1050.61	2	1.2	19.24	0.131	0
									IKQEEDIEIK		ASTEI05294-PA	2	622.841	1244.67	2	2.73	44.44	0.445	1
									VVDREDATDPPAGR		ASTEI05294-PA	11	749.368	1497.73	2	1.94	45.64	-0.004	1
									RTDDDDDTVDDDGDGADGEDEAGDDGQLGGR		ASTEI05294-PA	1	1056.74	3168.19	3	6.89	128.17	2.128	1
									mMESIDLIR	M1(Oxidation)	ASTEI05294-PA	1	562.277	1123.55	2		30.71	-1.117	0
									MmESIDLIR	M2(Oxidation)	ASTEI05294-PA	2	562.277	1123.55	2	0.4		-1.117	0
									MMESIDLIR		ASTEI05294-PA	2	554.281	1107.55	2	2.23	52.74	0.117	0
ASTEI07237-PA	3.69	2	2	2	1247	136.185	7.66	Midgut,Thorax
									IASVDEFLDTDESIHGmYVVNPR	M17(Oxidation)	ASTEI07237-PA	1	875.08	2623.22	3	2.99		-3.461	0
									SLVEEYAGPAGLYGSGLSAGISK		ASTEI07237-PA	1	742.719	2226.14	3	1.54		6.63	0
ASTEI01430-PA	2.38	3	3	6	1216	126.096	9.23	Midgut,Ovary,Fatbody,Salivary glands,Testis
									ESVQIGWK		ASTEI01430-PA	1	473.753	946.499	2	1.68	56.88	-0.243	0
									ETTPLNQILGGYLR		ASTEI01430-PA	3	787.932	1574.86	2	2.29	41.89	1.36	0
									LPDINAR		ASTEI01430-PA	2	399.728	798.448	2	1.35		1.471	0
ASTEI09815-PA	39.59	21	21	59	836	94.6	7.9	Midgut,Brain,Salivary glands,Ovary,Fatbody,Malpighian tubules,Maxillary palps
									TTScLLATGNEITLVR	C4(Carbamidomethyl)	ASTEI09815-PA	3	874.962	1748.92	2	3.84	76.09	-2.37	0
									TIEADLADETKK		ASTEI09815-PA	4	667.346	1333.68	2	1.82	44.51	-0.46	1
									NVGIPITIQQFNHLQPVVILDR		ASTEI09815-PA	2	838.812	2514.42	3	1.89	64.69	1.267	0
									LQVPLLLK		ASTEI09815-PA	4	462.317	923.626	2	1.05	40.17	-2.675	0
									DVTDVADAK		ASTEI09815-PA	1	467.23	933.453	2	2.44	37.95	0.282	0
									ILEHWAFQK		ASTEI09815-PA	5	586.314	1171.62	2	3.03	34.65	-3.854	0
									ANQLVWcVDGGSTK	C7(Carbamidomethyl)	ASTEI09815-PA	3	767.872	1534.74	2	1.03		3.059	0
									TIEADLADETK		ASTEI09815-PA	2	603.298	1205.59	2	1.53	76.73	-0.003	0
									IIHDKNDDEIAR		ASTEI09815-PA	4	360.437	1438.73	4	2.7	13.76	-0.435	1
									fSSAGLHEPMSYANVADk	N-Term(iTRAQ4plex); K18(iTRAQ4plex)	ASTEI09815-PA	1	738.05	2212.14	3	2.75		18.133	0
									VLTNYYHELVQK		ASTEI09815-PA	1	502.937	1506.8	3	1.33	37.47	1.322	0
									LDGSTSTRPIIR		ASTEI09815-PA	2	439.249	1315.73	3	3.19	25.88	-0.222	0
									EALQLGNLDASIPDISGNYR		ASTEI09815-PA	3	1073.54	2146.07	2	3.72	99.89	-2.455	0
									IQTYAENYQWDELEK		ASTEI09815-PA	4	965.445	1929.88	2	1.6	62.16	-1.976	0
									KLLQLGDQR		ASTEI09815-PA	1	535.819	1070.63	2	2	58.91	-1.673	1
									sLLcNTGDWFTLGQGNAFR	N-Term(Acetyl); C4(Carbamidomethyl)	ASTEI09815-PA	1	1100.02	2199.03	2		85.2	-0.002	0
									LAITLLELETK		ASTEI09815-PA	1	622.379	1243.75	2	2.41	67.27	0.049	0
									IFGINISEPASFLFEAHR		ASTEI09815-PA	5	683.358	2048.06	3	5.13	66.25	0.363	0
									DIHSQEDDFLSQAELALR		ASTEI09815-PA	5	1044.01	2087.01	2	1.97	84.58	0.29	0
									LPAAVADcIDAAGHEFDPNTQK	C8(Carbamidomethyl)	ASTEI09815-PA	5	780.705	2340.1	3	4.76	11.82	3.138	0
ASTEI04464-PA	9.52	1	1	2	126	13.222	9.47	Midgut,Fatbody
									VVNPAPYALPGR		ASTEI04464-PA	2	627.356	1253.7	2	2.48	45.94	2.905	0
ASTEI08761-PA	3.02	2	2	2	1653	177.805	7.25	Midgut,Legs
									SSSETPPSYNQLNYNENLQRFFDSRPAMNIEEQMK		ASTEI08761-PA	1	1041.98	4164.91	4	1.16		0.877	1
ASTEI09500-PA	63.33	5	5	10	90	10.036	5.17	Ovary,Legs,Testis
									NFVAEPMGEKPVTDLAGVGDVLGK		ASTEI09500-PA	3	1222.13	2443.26	2	7.21	92.62	3.823	0
									NFVAEPmGEKPVTDLAGVGDVLGK	M7(Oxidation)	ASTEI09500-PA	2	820.425	2459.26	3	4.1	30.94	4.942	0
									AYTVLGQYLILK		ASTEI09500-PA	2	691.408	1381.81	2	3.49	39.24	0.005	0
									DAELFKEWMK		ASTEI09500-PA	1	648.817	1296.63	2	3.57		-2.385	1
									AYTVLGQYLILKK		ASTEI09500-PA	1	503.972	1509.9	3	3.88	46.93	-1.46	1
ASTEI04298-PA	4.92	1	1	1	264	28.555	7.58	Brain
									VLFTQAQVYELER		ASTEI04298-PA	1	798.425	1595.84	2	3.38	71.61	0.37	0
ASTEI05355-PA	70.25	18	18	842	242	26.553	5.1	Midgut,Brain,Salivary glands,Thorax,Proboscis,Male accessory glands,Antennae,Fatbody,Larvae,Ovary,Pupae,Malpighian tubules,Other,Heamolymph,Legs,Head,Maxillary palps,Testis
									SIEMDGLLWGAAK		ASTEI05355-PA	74	695.859	1390.71	2	2.18	48.6	4.519	0
									ERSEWGGQALPQVAGGKPTAAAPAGGDDDDDVDLFGSEDEEESAEAAK		ASTEI05355-PA	1	1212.05	4845.17	4	8.21	62.57	3.208	1
									ADLSVFDALGK		ASTEI05355-PA	149	568.304	1135.6	2	3.35	63.47	0.629	0
									aPAATYVHALR	N-Term(iTRAQ4plex)	ASTEI05355-PA	5	657.376	1313.74	2	3.8	57.87	0.559	0
									SIEmDGLLWGAAK	M4(Oxidation)	ASTEI05355-PA	43	703.854	1406.7	2	2.96	57.83	1.835	0
									FLADHSYVEGYTPSK		ASTEI05355-PA	117	571.943	1713.81	3	2.99	46.96	0.927	0
									tANGLkELDkFLADHSYVEGYTPSk	N-Term(iTRAQ4plex); K6(iTRAQ4plex); K10(iTRAQ4plex); K25(iTRAQ4plex)	ASTEI05355-PA	1	840.708	3359.81	4	3.21	27.57	3.783	2
									TANGLKELDKFLADHSYVEGYTPSK		ASTEI05355-PA	19	928.47	2783.39	3	6.11	52.54	2.242	2
									aDLSVFDALGk	N-Term(iTRAQ4plex); K11(iTRAQ4plex)	ASTEI05355-PA	6	712.406	1423.81	2	4.78	76.16	1.17	0
									WYNHIASFNAK		ASTEI05355-PA	36	450.89	1350.65	3	2.1	35.72	-3.194	0
									SSIILDVKPWDDETDMKEmEK	M19(Oxidation)	ASTEI05355-PA	1	1263.09	2525.18	2	1.21		0.883	1
									aDLSVFDALGkAPAATYVHALR	N-Term(iTRAQ4plex); K11(iTRAQ4plex)	ASTEI05355-PA	1	644.364	2574.43	4	6.69	46.92	2.006	1
									fLADHSYVEGYTPSk	N-Term(iTRAQ4plex); K15(iTRAQ4plex)	ASTEI05355-PA	8	668.012	2002.02	3	7.2	52.7	2.367	0
									LQIccVIEDDK	C4(Carbamidomethyl); C5(Carbamidomethyl)	ASTEI05355-PA	7	696.829	1392.65	2	3.27	56.56	0.788	0
									APAATYVHALR		ASTEI05355-PA	62	390.555	1169.65	3	3.78	53.05	6.132	0
									FLADHSYVEGYTPSKADLSVFDALGK		ASTEI05355-PA	2	944.143	2830.41	3	3.37	13.52	7.338	1
									ADLSVFDALGKAPAATYVHALR		ASTEI05355-PA	12	572.317	2286.25	4	6.65	54.12	10.279	1
ASTEI05321-PA	34.15	3	3	3	82	10.047	6.79	Antennae,Legs,Midgut
									ALEEMEQK		ASTEI05321-PA	1	489.233	977.459	2	1.09	19.24	-1.642	0
									ERHDQELLK		ASTEI05321-PA	1	389.878	1167.62	3	4.78	30.57	7.464	1
									qLYPPENPQHR	N-Term(iTRAQ4plex)	ASTEI05321-PA	1	508.267	1522.79	3	4.8	34.63	-0.335	0
ASTEI04543-PA	49.56	87	87	863	2064	231.622	6.1	Midgut,Brain,Salivary glands,Proboscis,Male accessory glands,Antennae,Fatbody,Larvae,Ovary,Pupae,Malpighian tubules,Heamolymph,Maxillary palps,Testis
									iNGLEIEPR	N-Term(iTRAQ4plex)	ASTEI04543-PA	1	592.841	1184.68	2	3.65	41.54	0.087	0
									TTGEKAILLFQPPIR		ASTEI04543-PA	2	561.998	1683.98	3	2.36	36.05	-0.156	1
									IEGNFmDDAR	M6(Oxidation)	ASTEI04543-PA	10	592.257	1183.51	2	2.69	60.69	1.791	0
									NWVVDAPTR		ASTEI04543-PA	8	529.276	1057.55	2	2.21	27.19	2.037	0
									LSFDLcPDVK	C6(Carbamidomethyl)	ASTEI04543-PA	15	597.298	1193.59	2	3.01	26.2	1.38	0
									AVYFDPSTKEEK		ASTEI04543-PA	5	707.349	1413.69	2	3.16	34.24	0.642	1
									EPPNLGITQMYFLQQK		ASTEI04543-PA	1	953.99	1906.97	2	3.76	41.45	-0.143	0
									IEGNFMDDAR		ASTEI04543-PA	8	584.257	1167.51	2	1.74	45.87	-2.122	0
									LDPYALYVIVEK		ASTEI04543-PA	26	711.899	1422.79	2	3.06	57.81	2.108	0
									WLSDEGYYKEPPNLGITQMYFLQQK		ASTEI04543-PA	6	1016.83	3048.48	3	2.91	38.38	-1.413	1
									SASDEDFSFNIQYR		ASTEI04543-PA	15	839.872	1678.74	2	5.02	91.25	1.606	0
									DLKINGLEIEPR		ASTEI04543-PA	1	698.897	1396.79	2	3.03	73.87	4.673	1
									SIQVAVIR		ASTEI04543-PA	14	443.279	885.552	2	1.88	43.28	-0.124	0
									KGLASSNNFVGSLK		ASTEI04543-PA	2	711.39	1421.77	2	4.37	78.89	-0.905	1
									vIAVLDDHVR	N-Term(iTRAQ4plex)	ASTEI04543-PA	1	640.876	1280.74	2	3.53	47.63	0.442	0
									SDVYSIDIDGNGVFPPAR		ASTEI04543-PA	8	961.469	1921.93	2	2.12	31.72	0.383	0
									DDGIIcDcK	C6(Carbamidomethyl); C8(Carbamidomethyl)	ASTEI04543-PA	1	548.226	1095.44	2	1.68	44.62	0.713	0
									VVGDVSLDNcK	C10(Carbamidomethyl)	ASTEI04543-PA	22	603.294	1205.58	2	2.95	97.99	-1.374	0
									TcEELALLGYSK	C2(Carbamidomethyl)	ASTEI04543-PA	10	692.346	1383.68	2	4.18	75.3	1.358	0
									SHIWWPmNNPDTLSLK	M7(Oxidation)	ASTEI04543-PA	2	977.979	1954.95	2	2.96	54.02	1.67	0
									DNGTKPLVGILK		ASTEI04543-PA	2	418.919	1254.74	3	3.19	43.18	0.698	0
									LIIGSSLK		ASTEI04543-PA	6	415.771	830.535	2	1.92	41.24	0.628	0
									SHIWWPMNNPDTLSLK		ASTEI04543-PA	3	646.988	1938.95	3	3.01	49.27	-2.047	0
									QTDEDIIWSK		ASTEI04543-PA	4	617.802	1234.6	2	2.95	50.78	1.053	0
									cAVKDDGIIcDcK	C1(Carbamidomethyl); C10(Carbamidomethyl); C12(Carbamidomethyl)	ASTEI04543-PA	1	518.564	1553.68	3	4.05	27.03	0.557	1
									GDIAFSFR		ASTEI04543-PA	1	456.734	912.46	2	1.98	52.86	3.014	0
									cTGPGEPGQcQTFDYR	C1(Carbamidomethyl); C10(Carbamidomethyl)	ASTEI04543-PA	1	936.885	1872.76	2	3.05	113.63	-0.231	0
									kGDIAFSFR	N-Term(iTRAQ4plex); K1(iTRAQ4plex)	ASTEI04543-PA	1	443.591	1328.76	3	3.07	10.72	0.549	1
									tIVEHNLPSQVDVR	N-Term(iTRAQ4plex)	ASTEI04543-PA	1	584.324	1750.96	3	4.29	25.53	0.597	0
									AASDLLPITPLIATKHENVK		ASTEI04543-PA	1	711.077	2131.22	3	4.52	47.45	2.187	1
									iGENLISLR	N-Term(iTRAQ4plex)	ASTEI04543-PA	1	579.852	1158.7	2	3.56	45.67	0.213	0
									FmINTDTR	M2(Oxidation)	ASTEI04543-PA	4	507.239	1013.47	2	2.24	39.12	-1.157	0
									GSELTFK		ASTEI04543-PA	4	391.209	781.41	2	1.62	47.68	0.968	0
									KTcEELALLGYSK	C3(Carbamidomethyl)	ASTEI04543-PA	4	756.392	1511.78	2	5.14	86.77	0.032	1
									RLTLAESVGTVR		ASTEI04543-PA	4	651.381	1301.76	2	2.39	29.63	0.803	1
									LATDRLSFDLcPDVK	C11(Carbamidomethyl)	ASTEI04543-PA	4	875.449	1749.89	2	3.71	45.04	4.113	1
									IWIDYNEHHVR		ASTEI04543-PA	12	494.583	1481.73	3	3.85	27.57	4.55	0
									SEAETITVINSQGVR		ASTEI04543-PA	21	802.421	1603.83	2	4.42	93.36	3.577	0
									GASFSGEATLLR		ASTEI04543-PA	18	604.819	1208.63	2	3.51	36.74	3.4	0
									YEGEHcDIYTATVLTLR	C6(Carbamidomethyl)	ASTEI04543-PA	14	680.995	2040.97	3	5.57	43.27	0.868	0
									TRLPHGLLVYHNVK		ASTEI04543-PA	6	412.493	1646.95	4	4.48	48.88	0.163	1
									TLVIDTNR		ASTEI04543-PA	8	466.264	931.521	2	2.52	44.45	0.303	0
									NWVVDAPTRLPYK		ASTEI04543-PA	2	779.926	1558.85	2	3.34	59.82	4.929	1
									lDPYALYVIVEk	N-Term(iTRAQ4plex); K12(iTRAQ4plex)	ASTEI04543-PA	3	856.002	1711	2	4.36	66.14	2.381	0
									TLVIDTNRK		ASTEI04543-PA	1	530.31	1059.61	2	2.21	44.13	-2.152	1
									QFDVIQK		ASTEI04543-PA	2	439.242	877.477	2		25.57	-1.461	0
									APLELHSSTWFK		ASTEI04543-PA	22	472.586	1415.74	3	4.13	30.49	8.266	0
									KGDIAFSFR		ASTEI04543-PA	15	520.779	1040.55	2	3.11	56.31	-0.7	1
									FMINTDTR		ASTEI04543-PA	8	499.242	997.476	2	1.76	67.75	-1.195	0
									tNYDDSALFYASGESLkPQYIAASIk	N-Term(iTRAQ4plex); K17(iTRAQ4plex); K26(iTRAQ4plex)	ASTEI04543-PA	2	821.934	3284.71	4	3.6	25.84	2.174	0
									AQVETTPPINTETGGIR		ASTEI04543-PA	16	892.466	1783.92	2	3.86	77.46	3.464	0
									WAHLGQHcETNINEDALTFISR	C8(Carbamidomethyl)	ASTEI04543-PA	2	653.815	2612.24	4	4.8	41.5	2.88	0
									AVYFDPSTK		ASTEI04543-PA	6	514.259	1027.51	2	2.86	53.79	2.066	0
									ILDLLGPIHNLLFDPEIYFGGGPNLSK		ASTEI04543-PA	1	984.871	2952.6	3	6.83	61.84	3.569	0
									VmLLLQSR	M2(Oxidation)	ASTEI04543-PA	1	488.287	975.566	2	2.08	45.48	0.295	0
									cINHYYDIScDcFGTR	C1(Carbamidomethyl); C10(Carbamidomethyl); C12(Carbamidomethyl)	ASTEI04543-PA	2	1040.92	2080.84	2	2.99	40.18	3.196	0
									aTAVLAYSEVk	N-Term(iTRAQ4plex); K11(iTRAQ4plex)	ASTEI04543-PA	1	720.422	1439.84	2	4.53	77.15	1.815	0
									LDPYALYVIVEKGQLK		ASTEI04543-PA	1	617.023	1849.06	3	3.1	20.06	4.126	1
									MVDLQPEEEFGPFEGSMFIGGAPTEISK		ASTEI04543-PA	4	1521.71	3042.41	2	2.71	39.44	-1.638	0
									YIIESFVGcIR	C9(Carbamidomethyl)	ASTEI04543-PA	18	678.854	1356.7	2	2.96	52.89	1.32	0
									DcKPScVPNPcK	C2(Carbamidomethyl); C6(Carbamidomethyl); C11(Carbamidomethyl)	ASTEI04543-PA	1	487.882	1461.63	3	3.06	23.87	1.07	0
									WLSDEGYYK		ASTEI04543-PA	3	580.765	1160.52	2	2.47	39.02	-2.073	0
									ITLGPLEcVETNTQK	C8(Carbamidomethyl)	ASTEI04543-PA	23	851.94	1702.87	2	3.56	33.99	2.296	0
									GLASSNNFVGSLK		ASTEI04543-PA	6	647.346	1293.68	2	3.6	99.79	3.44	0
									sIQVAVIR	N-Term(iTRAQ4plex)	ASTEI04543-PA	2	515.33	1029.65	2	3.58	40.9	-1.186	0
									IENPTSWHSIQLTYEGNDIR		ASTEI04543-PA	14	791.721	2373.15	3	6.53	57.65	1.143	0
									ATAVLAYSEVK		ASTEI04543-PA	23	576.322	1151.64	2	2.41	30.77	5.576	0
									mVDLQPEEEFGPFEGSMFIGGAPTEISKK	M1(Oxidation)	ASTEI04543-PA	1	1062.84	3186.5	3	4.51	34.51	-0.643	1
									WLSDEGYYKEPPNLGITQmYFLQQK	M19(Oxidation)	ASTEI04543-PA	1	1022.16	3064.48	3	5.45	50.14	1.548	1
									TNYDDSALFYASGESLKPQYIAASIK		ASTEI04543-PA	7	951.47	2852.4	3	4.33	33.25	-0.817	0
									IGENLISLR		ASTEI04543-PA	42	507.8	1014.59	2	2.88	76.56	-1.309	0
									GASFSGEATLLRR		ASTEI04543-PA	1	682.869	1364.73	2	2.91	23.69	1.547	1
									VMLLLQSR		ASTEI04543-PA	6	480.289	959.57	2	2.36	26.42	-0.419	0
									TSEGNGFWELR		ASTEI04543-PA	3	648.305	1295.6	2	1.22	36.74	0.988	0
									DEWHSVMVR		ASTEI04543-PA	3	386.85	1158.54	3	2.27	55.19	0.39	0
									DSQLLDHELQWESLAAEENEALLK		ASTEI04543-PA	4	1391.18	2781.36	2	2.72	53.66	-0.847	0
									AAASGLVGcLR	C9(Carbamidomethyl)	ASTEI04543-PA	18	537.791	1074.58	2	3.67	56.91	2.548	0
									QNLcFTGSR	C4(Carbamidomethyl)	ASTEI04543-PA	2	541.756	1082.51	2	3.13	48.11	0.576	0
									ELWSTFEcVcQNR	C8(Carbamidomethyl); C10(Carbamidomethyl)	ASTEI04543-PA	11	864.883	1728.76	2	3.83	44.52	7.247	0
									QESTcNcEHTSFLGEFcSEEK	C5(Carbamidomethyl); C7(Carbamidomethyl); C17(Carbamidomethyl)	ASTEI04543-PA	2	860.345	2579.02	3	6.03	58.01	3.445	0
									vDNNkEEVYLk	N-Term(iTRAQ4plex); K5(iTRAQ4plex); K11(iTRAQ4plex)	ASTEI04543-PA	1	595.003	1782.99	3	2.93		-1.107	1
									LQLAFSSHDMR		ASTEI04543-PA	2	435.552	1304.64	3	2.71	63.07	-0.425	0
									NcEDDNHScNcDANLNR	C2(Carbamidomethyl); C9(Carbamidomethyl); C11(Carbamidomethyl)	ASTEI04543-PA	6	703.26	2107.76	3	3.72	42.29	1.877	0
									INGLEIEPR		ASTEI04543-PA	10	520.792	1040.58	2	2.65	44.25	2.339	0
									LTLAESVGTVR		ASTEI04543-PA	19	573.333	1145.66	2	3.49	69.7	5.001	0
									TIVEHNLPSQVDVR		ASTEI04543-PA	37	803.933	1606.86	2	4.41	45.42	2.414	0
									TPAGVKLDPYALYVIVEK		ASTEI04543-PA	1	659.377	1976.12	3	6.94	63.95	2.447	1
									VIAVLDDHVR		ASTEI04543-PA	14	568.825	1136.64	2	3.28	70.48	0.616	0
									AILNSSLLVNLR		ASTEI04543-PA	10	656.901	1312.8	2	3.68	76.81	0.616	0
									NLDEESQGR		ASTEI04543-PA	1	524.239	1047.47	2	2.49	59.13	-0.165	0
									VDNNKEEVYLK		ASTEI04543-PA	9	450.9	1350.69	3	3.43	49.69	-2.858	1
									lPHGLLVYHNVk	N-Term(iTRAQ4plex); K12(iTRAQ4plex)	ASTEI04543-PA	2	420.257	1678.01	4	4.49	34.88	0.58	0
									LPHGLLVYHNVK		ASTEI04543-PA	11	695.402	1389.8	2	3.41	47.33	-1.811	0
ASTEI06990-PA	58.33	7	7	48	132	14.706	9.36	Midgut,Thorax,Salivary glands,Proboscis,Antennae,Ovary,Fatbody,Malpighian tubules,Legs,Maxillary palps
									eLAPVHLDIVNESYMHNVPk	N-Term(iTRAQ4plex); K20(iTRAQ4plex)	ASTEI06990-PA	1	865.128	2593.37	3	5.79	37.94	-0.165	0
									TPQQWNEAYKLEPSPNcK	C17(Carbamidomethyl)	ASTEI06990-PA	1	730.681	2190.03	3	3.91	65.38	0.015	1
									tQLAGDFVHALSIVAk	N-Term(iTRAQ4plex); K16(iTRAQ4plex)	ASTEI06990-PA	4	653.383	1958.13	3	5.8	53.73	0.808	0
									TQLAGDFVHALSIVAK		ASTEI06990-PA	17	557.315	1669.93	3	1.98	19.79	2.022	0
									vLVVSQQFEGLPLIkR	N-Term(iTRAQ4plex); K15(iTRAQ4plex)	ASTEI06990-PA	1	705.437	2114.3	3	4.23	16.94	0.805	1
									ELAPVHLDIVNESYMHNVPK		ASTEI06990-PA	4	769.061	2305.17	3	6.85	40.44	1.388	0
									TPQQWNEAYK		ASTEI06990-PA	4	632.8	1264.59	2	1.96	44.08	-1.706	0
									VLVVSQQFEGLPLIKR		ASTEI06990-PA	1	609.368	1826.09	3	4.4	58.06	0.411	1
									VLVVSQQFEGLPLIK		ASTEI06990-PA	9	835.5	1669.99	2	1.39	13.99	2.933	0
									LVNDIVK		ASTEI06990-PA	6	400.749	800.49	2	1.7	23.15	3.261	0
ASTEI01256-PA	77.18	20	20	3079	355	36.741	7.5	Midgut,Salivary glands,Thorax,Brain,Proboscis,Male accessory glands,Antennae,Fatbody,Larvae,Ovary,Pupae,Malpighian tubules,Legs,Head,Maxillary palps,Testis
									AAHFAAHAAAKAR		ASTEI01256-PA	7	646.852	1292.7	2	3.16	37.93	-0.615	1
									HETKDAHGITHGGYSYVDANGHVQSVK		ASTEI01256-PA	1	727.599	2907.38	4	5.82	12.06	-0.619	1
									AGSGAWAPAGHEDDGSYDGR		ASTEI01256-PA	126	988.411	1975.82	2	3.55	75.29	-0.579	0
									ALGYGHAQAGPIPDTPEVAHAKAAHAAAHAAAR		ASTEI01256-PA	1	640.537	3198.66	5	2.65		8.192	1
									AAHFAAVAK		ASTEI01256-PA	25	443.251	885.494	2	2.24	44.09	0.099	0
									AEHAAAHAKALGYGHAQAGPIPDTPEVAHAK		ASTEI01256-PA	1	515.269	3086.58	6	3.98	12.77	7.206	1
									DAHGITHGGYSYVDANGHVQSVKYTADPIHGFQVSGTNLPK		ASTEI01256-PA	6	723.854	4338.09	6	3.01	16.14	-2.106	1
									AAHYAAIAEASARAGSGAWAPAGHEDDGSYDGR		ASTEI01256-PA	1	815.375	3258.48	4	3.69	10.63	6.258	1
ASTEI04410-PA	10.21	10	10	14	1430	157.152	6.99	Midgut,Brain,Fatbody,Head
									HLQPDVVR		ASTEI04410-PA	1	482.272	963.537	2	2.57	45.94	-0.048	0
									TISPVYLSR		ASTEI04410-PA	1	518.296	1035.58	2		24.56	0.893	0
									GDHIVMRPGQVSPGTcQEVGGR	C16(Carbamidomethyl)	ASTEI04410-PA	1	585.036	2337.12	4	4.53	14.13	0.735	0
									DALQcLHDDIESMLSVHEER	C5(Carbamidomethyl)	ASTEI04410-PA	1	799.696	2397.07	3	4.16	45.9	-2.655	0
									QIGFSPQAR		ASTEI04410-PA	1	502.269	1003.53	2	1.7	30.96	-2.161	0
									GDHIVmRPGQVSPGTcQEVGGR	M6(Oxidation); C16(Carbamidomethyl)	ASTEI04410-PA	1	785.043	2353.11	3	4.57	27.94	-0.112	0
									DVGAPEQALAGDLHLAR		ASTEI04410-PA	1	578.304	1732.9	3	4.11	73.34	-0.265	0
									HGISGALSGGPK		ASTEI04410-PA	3	360.865	1080.58	3	3.43	34.04	-0.175	0
									RQDDPEAVVQR		ASTEI04410-PA	2	438.225	1312.66	3	3.92	65.03	0.274	1
ASTEI06323-PA	79.78	28	28	909	183	21.135	11.22	Midgut,Salivary glands,Thorax,Brain,Proboscis,Male accessory glands,Antennae,Fatbody,Larvae,Ovary,Pupae,Malpighian tubules,Other,Legs,Head,Maxillary palps,Testis
									kVVVSNGMLFGkPR	N-Term(iTRAQ4plex); K1(iTRAQ4plex); K12(iTRAQ4plex)	ASTEI06323-PA	2	655.4	1964.18	3	5.19	27.19	0.396	1
									FNmTDFDRFK	M3(Oxidation)	ASTEI06323-PA	20	446.208	1336.61	3	2.96	39	7.404	1
									KGTKPLPSKR		ASTEI06323-PA	13	371.237	1111.7	3	3.31	48.87	0.781	2
									LVcIVNVIDQNRVLIDGPTSGVPR	C3(Carbamidomethyl)	ASTEI06323-PA	14	878.823	2634.45	3	2.76	18.47	5.798	1
									vVVSNGMLFGkPR	N-Term(iTRAQ4plex); K11(iTRAQ4plex)	ASTEI06323-PA	3	846.499	1691.99	2	4.69	71.83	2.602	0
									FNMTDFDRFKLR		ASTEI06323-PA	10	795.398	1589.79	2	2.02	32.48	-0.023	2
									kGTkPLPSk	N-Term(iTRAQ4plex); K1(iTRAQ4plex); K4(iTRAQ4plex); K9(iTRAQ4plex)	ASTEI06323-PA	2	383.756	1532	4	3.02	16.93	-0.042	1
									VVVSNGMLFGKPR		ASTEI06323-PA	26	468.603	1403.8	3	3.71	45.48	8.84	0
									DALVKFDIK		ASTEI06323-PA	9	524.806	1048.61	2	2.02	29.8	1.655	1
									fNMTDFDR	N-Term(iTRAQ4plex)	ASTEI06323-PA	4	595.276	1189.55	2	3.13	44.35	1.556	0
									GAAAAPAKK		ASTEI06323-PA	1	392.738	784.468	2	2.22	44.64	0.799	1
									VVSAQYK		ASTEI06323-PA	10	397.723	794.439	2	1.71	25.9	-2.74	0
									KGTKPLPSK		ASTEI06323-PA	4	478.301	955.594	2	2.75	39.68	0.46	1
									fNmTDFDR	N-Term(iTRAQ4plex); M3(Oxidation)	ASTEI06323-PA	5	603.274	1205.54	2	2.25	33.45	2.716	0
									FNMTDFDRFK		ASTEI06323-PA	33	440.874	1320.61	3		18.36	2.026	1
									GTKPLPSK		ASTEI06323-PA	2	414.253	827.498	2	2.21	46.53	-0.281	0
									YKGRLVcIVNVIDQNR	C7(Carbamidomethyl)	ASTEI06323-PA	2	649.692	1947.06	3	2.95	40.78	1.006	2
									FNMTDFDR		ASTEI06323-PA	43	523.223	1045.44	2	1.84	51.71	-2.421	0
									vVSAQYk	N-Term(iTRAQ4plex); K7(iTRAQ4plex)	ASTEI06323-PA	2	541.826	1082.64	2	3.07	41.11	-0.004	0
									vRFPHTAR	N-Term(iTRAQ4plex)	ASTEI06323-PA	1	376.557	1127.65	3	2.55	31.67	-0.41	1
									GAAAAPAK		ASTEI06323-PA	1	328.69	656.373	2	2.09	45.2	0.675	0
									KVVVSNGMLFGKPR		ASTEI06323-PA	5	511.298	1531.88	3	4.73	46.4	1.966	1
									kVVVSNGmLFGkPR	N-Term(iTRAQ4plex); K1(iTRAQ4plex); M8(Oxidation); K12(iTRAQ4plex)	ASTEI06323-PA	2	660.731	1980.18	3	3.96	39.41	-0.029	1
									VVVSNGmLFGKPR	M7(Oxidation)	ASTEI06323-PA	26	710.396	1419.78	2	1.5	75.62	4.465	0
									VVSAQYKK		ASTEI06323-PA	3	461.772	922.537	2	1.98	40.94	1.015	1
									fNMTDFDRFkLR	N-Term(iTRAQ4plex); K10(iTRAQ4plex)	ASTEI06323-PA	2	626.669	1877.99	3	2.69		-0.072	2
									RFNmTDFDRFK	M4(Oxidation)	ASTEI06323-PA	1	498.241	1492.71	3	4.17	34.59	5.434	2
									FNmTDFDR	M3(Oxidation)	ASTEI06323-PA	19	531.223	1061.44	2	2.45	47.8	2.406	0
									QQYAVNHLHLTK		ASTEI06323-PA	50	726.391	1451.78	2	2.85	53.73	0.025	0
									sFTKFVETGR	N-Term(Acetyl)	ASTEI06323-PA	6	607.311	1213.62	2		47.37	-4.588	1
									fNMTDFDRFk	N-Term(iTRAQ4plex); K10(iTRAQ4plex)	ASTEI06323-PA	2	804.91	1608.81	2	4.21	52.86	2.168	1
									VRFPHTAR		ASTEI06323-PA	7	492.281	983.554	2	2.13	27.79	0.984	1
									RFNMTDFDR		ASTEI06323-PA	2	601.274	1201.54	2	3.55	47.32	-0.926	1
									KVVVSNGmLFGKPR	M8(Oxidation)	ASTEI06323-PA	2	516.63	1547.88	3	2.56	18.09	1.169	1
									FVETGRVAK		ASTEI06323-PA	2	503.788	1006.57	2	2.33	45.78	0.04	1
									NRVVSAQYK		ASTEI06323-PA	1	532.796	1064.58	2	2.88	33.93	-0.561	1
									RFNMTDFDRFK		ASTEI06323-PA	2	492.909	1476.71	3	4.28	28.25	3.826	2
									FNmTDFDRFKLR	M3(Oxidation)	ASTEI06323-PA	2	402.202	1605.78	4	2.55	41.14	-0.066	2
									DALVKFDIKK		ASTEI06323-PA	3	588.855	1176.7	2	2.91	47.45	3.135	2
									sFTKFVETGRVAK	N-Term(Acetyl)	ASTEI06323-PA	5	504.612	1511.82	3		27.38	0.662	2
									qQYAVNHLHLTk	N-Term(iTRAQ4plex); K12(iTRAQ4plex)	ASTEI06323-PA	7	435.751	1739.98	4	6.23	41.12	0.974	0
									vVVSNGmLFGkPR	N-Term(iTRAQ4plex); M7(Oxidation); K11(iTRAQ4plex)	ASTEI06323-PA	2	854.497	1707.99	2	3.84	64.28	2.482	0
ASTEI03583-PA	17.95	2	2	10	117	12.936	7.96	Proboscis,Antennae,Ovary,Fatbody,Salivary glands,Legs
									SLGERDDITK		ASTEI03583-PA	2	567.294	1133.58	2	3.35	35.7	0.33	1
									EWENSWSSDTK		ASTEI03583-PA	8	684.789	1368.57	2	2.62	55.35	0.043	0
ASTEI02538-PA	22.24	12	12	40	742	82.385	7.55	Brain,Midgut,Salivary glands,Proboscis,Larvae,Ovary,Pupae,Fatbody,Malpighian tubules,Male accessory glands
									eNQYLVGFVLRR	N-Term(iTRAQ4plex)	ASTEI02538-PA	1	546.646	1637.92	3	2.05		-0.728	1
									VPcGLFIPSLALGAITGR	C3(Carbamidomethyl)	ASTEI02538-PA	5	921.521	1842.04	2	2.51	19.82	2.707	0
									lLGVITk	N-Term(iTRAQ4plex); K7(iTRAQ4plex)	ASTEI02538-PA	1	516.357	1031.71	2	2.86	38.38	-0.241	0
									LLGVITK		ASTEI02538-PA	4	372.255	743.502	2	1.55	40.65	-0.466	0
									WVGDALGR		ASTEI02538-PA	1	437.232	873.456	2	1.64	36.35	-1.852	0
									FGIcPQAFWLNR	C4(Carbamidomethyl)	ASTEI02538-PA	11	754.877	1508.75	2	2.84	53.41	-0.67	0
									ENQYLVGFVLR		ASTEI02538-PA	3	669.365	1337.72	2	1.98	20.41	0.348	0
									IIDGITGQSLVIFTSAQPVQNLGPSPLK		ASTEI02538-PA	1	965.207	2893.61	3	5.11	77.47	1.314	0
									VVGIGMEQLAYNYPK		ASTEI02538-PA	3	841.438	1681.87	2	5.06	79.96	3.697	0
									RIIDGITGQSLVIFTSAQPVQNLGPSPLK		ASTEI02538-PA	2	1017.25	3049.73	3	2.76	10.92	7.536	1
ASTEI02650-PA	26.95	21	21	76	705	77.204	4.92	Midgut,Brain,Proboscis,Fatbody,Malpighian tubules,Salivary glands,Male accessory glands,Heamolymph
									TSLEKPMESFKPIAAER		ASTEI02650-PA	3	645.339	1934	3	4.39	86.66	-1.104	0
									GKYDVETANGQGR		ASTEI02650-PA	1	465.561	1394.67	3	1.17		1.216	1
									TPILVTRSR		ASTEI02650-PA	2	521.822	1042.64	2		30.97	-0.151	1
									YDVETANGQGR		ASTEI02650-PA	1	605.278	1209.55	2	2.86	65.1	-1.022	0
									YSPIYVPTSPK		ASTEI02650-PA	7	626.335	1251.66	2	2.17	36.12	0.62	0
									QLDVcNPSVVEER	C5(Carbamidomethyl)	ASTEI02650-PA	1	772.872	1544.74	2	3.29	113.91	-0.508	0
									TPILVTR		ASTEI02650-PA	7	400.256	799.504	2	1.53	40.05	0.149	0
									tAFSPVkPVR	N-Term(iTRAQ4plex); K7(iTRAQ4plex)	ASTEI02650-PA	2	695.428	1389.85	2	3.67	21.13	1.539	0
									LAEVNHLGKR		ASTEI02650-PA	1	568.83	1136.65	2	3.26	54.03	-1.209	1
									LDLSGLELTK		ASTEI02650-PA	1	544.804	1088.6	2	2.78	51.68	-17.065	0
									NGHGAGSPATPEQTPLMSPDK		ASTEI02650-PA	1	697.997	2091.98	3	1.59	28.47	0.075	0
									ikLTETPkPk	N-Term(iTRAQ4plex); K2(iTRAQ4plex); K8(iTRAQ4plex); K10(iTRAQ4plex)	ASTEI02650-PA	1	577.712	1731.12	3	2.87		-0.523	1
									AGDIITTMDDQKF		ASTEI02650-PA	5	727.845	1454.68	2	1.45	54.4	-0.739	1
									tPILVTR	N-Term(iTRAQ4plex)	ASTEI02650-PA	2	472.307	943.606	2	2.38	23.08	0.825	0
									VMIGAAGVMK		ASTEI02650-PA	5	488.769	976.531	2	2.08	56.6	-0.493	0
									YSPVYSPETGR		ASTEI02650-PA	2	628.301	1255.59	2	2.08	39.45	-1.253	0
									AGDIITTMDDQK		ASTEI02650-PA	5	654.31	1307.61	2	2.1	48.05	-1.149	0
									LDLSGLELTKVPGVLENVR		ASTEI02650-PA	1	684.719	2052.14	3	5.14	68.07	-13.455	1
									KLDLSHNR		ASTEI02650-PA	1	491.776	982.546	2	2.5	30.55	2.798	1
									ySPIYVPTSPk	N-Term(iTRAQ4plex); K11(iTRAQ4plex)	ASTEI02650-PA	1	770.438	1539.87	2	3.74	76.33	1.281	0
									LTETPKPK		ASTEI02650-PA	1	457.271	913.535	2	1.82	32.19	-0.83	0
									TAFSPVKPVR		ASTEI02650-PA	19	367.885	1101.64	3	2.5	45.11	-1.899	0
									LAEVNHLGK		ASTEI02650-PA	1	490.779	980.551	2	2.84	59.33	-1.23	0
									IKLTETPKPK		ASTEI02650-PA	1	385.577	1154.71	3	3.69	25.46	0.501	1
ASTEI02323-PA	10.4	13	13	15	1452	163.488	6.48	Thorax,Brain
									NELTELTNR		ASTEI02323-PA	1	545.281	1089.55	2	1.84	26.62	0.778	0
									GVKDELEASEGHK		ASTEI02323-PA	1	466.9	1398.69	3	2.65	32.37	-0.031	1
									ILPGNEVDLAcNLR	C11(Carbamidomethyl)	ASTEI02323-PA	1	792.414	1583.82	2	2.72	94.66	-0.073	0
									LVALPTDLFR		ASTEI02323-PA	2	572.84	1144.67	2	1.42	24.88	0.215	0
									FSSTVLAGLGDLR		ASTEI02323-PA	1	668.367	1335.73	2	1.12	45.94	-0.662	0
									NcDNYDTVSNcK	C2(Carbamidomethyl); C11(Carbamidomethyl)	ASTEI02323-PA	1	745.285	1489.56	2	3.22	50.72	-4.08	0
									DLPSLQILNVAR		ASTEI02323-PA	1	669.891	1338.77	2	2.26	62.05	-0.051	0
									YYHPTGAGSESGSNLR		ASTEI02323-PA	2	565.929	1695.77	3	4.54	31.35	0.617	0
									ETFGGLIR		ASTEI02323-PA	1	446.747	892.487	2	1.54	45.71	-1.693	0
									DLDADMR		ASTEI02323-PA	1	418.184	835.361	2	1.46	28.68	-0.37	0
									SYIPLIEAEPK		ASTEI02323-PA	1	630.348	1259.69	2	1.67	33.2	0.523	0
									LDGPQHHSYATIGPNcPR	C16(Carbamidomethyl)	ASTEI02323-PA	1	673.986	2019.94	3	4.19	41.75	-1.494	0
ASTEI07639-PA	57.91	18	18	205	373	40.457	6.55	Midgut,Thorax,Salivary glands,Brain,Male accessory glands,Fatbody,Larvae,Ovary,Pupae,Malpighian tubules,Maxillary palps,Testis
									vITAEDEVQNYNIDYLR	N-Term(iTRAQ4plex)	ASTEI07639-PA	1	1100.06	2199.1	2	2.91	46.98	-0.678	0
									TFLAAKR		ASTEI07639-PA	1	403.748	806.489	2		37.09	0.741	1
									LSmFcPTASR	M3(Oxidation); C5(Carbamidomethyl)	ASTEI07639-PA	1	593.275	1185.54	2	2.4	46.12	3.055	0
									FLEQTMEQGLVVDGTVTNEPTK		ASTEI07639-PA	3	812.737	2436.2	3	4	49.64	0.319	0
									TTAEVAELMR		ASTEI07639-PA	11	560.786	1120.56	2	2.97	72.11	-2.553	0
									vLDLmSNFk	N-Term(iTRAQ4plex); M5(Oxidation); K9(iTRAQ4plex)	ASTEI07639-PA	1	685.884	1370.76	2		57.71	1.04	0
									VLDLMSNFKK		ASTEI07639-PA	6	398.891	1194.66	3	2.16	25.59	2.72	1
									GLVmPLDLGAK	M4(Oxidation)	ASTEI07639-PA	6	565.317	1129.63	2		10.43	-1.88	0
									DNTGYHLK		ASTEI07639-PA	1	474.232	947.456	2	1.97	21.02	-1.766	0
									GILGGPDSSR		ASTEI07639-PA	8	479.752	958.496	2	1.76	26.68	0.568	0
									LSMFcPTASR	C5(Carbamidomethyl)	ASTEI07639-PA	4	585.275	1169.54	2	2.35	47.31	-1.877	0
									fFGLQSPIEk	N-Term(iTRAQ4plex); K10(iTRAQ4plex)	ASTEI07639-PA	1	727.419	1453.83	2	3.88	58.34	0.27	0
									TTAEVAELmR	M9(Oxidation)	ASTEI07639-PA	4	568.787	1136.57	2	1.95	64.03	3.89	0
									VLDLMSNFK		ASTEI07639-PA	5	533.782	1066.56	2	2.28	46.05	-2.378	0
									HLFIGSEGTLGIITR		ASTEI07639-PA	2	538.639	1613.9	3	2	26.51	0.601	0
									GLVMPLDLGAK		ASTEI07639-PA	15	557.322	1113.64	2	1.48	38.37	3.282	0
									GSFAELTDADVAVFR		ASTEI07639-PA	12	799.398	1597.79	2	1.73	36.35	1.797	0
									FFGLQSPIEK		ASTEI07639-PA	38	583.316	1165.62	2	2.69	41.17	-0.271	0
									YGNLHGSVLGVEAVTAEGR		ASTEI07639-PA	12	964.995	1928.98	2	1.51	83.02	-0.359	0
									VITAEDEVQNYNIDYLR		ASTEI07639-PA	26	1028	2055	2	1.14	40.72	-2.502	0
									tTAEVAELMR	N-Term(iTRAQ4plex)	ASTEI07639-PA	2	632.838	1264.67	2	3.73	56.2	0.334	0
									SVNVAFLGLNSYDDVK		ASTEI07639-PA	1	870.946	1740.89	2	1.36	43.53	3.048	0
									yGNLHGSVLGVEAVTAEGR	N-Term(iTRAQ4plex)	ASTEI07639-PA	1	691.7	2073.09	3	3	24.71	0.066	0
									vLDLMSNFk	N-Term(iTRAQ4plex); K9(iTRAQ4plex)	ASTEI07639-PA	1	677.887	1354.77	2	3.54	58.95	1.173	0
									SVNVAFLGLNSYDDVKR		ASTEI07639-PA	15	948.995	1896.98	2	4.32	100.99	0.778	1
									vLDLMSNFkk	N-Term(iTRAQ4plex); K9(iTRAQ4plex); K10(iTRAQ4plex)	ASTEI07639-PA	2	542.991	1626.96	3	2.89	31.69	-1.965	1
ASTEI02741-PA	12.84	2	2	5	148	15.117	10.1	Midgut,Brain,Proboscis,Fatbody
									LVAAAPVAK		ASTEI02741-PA	4	420.275	839.543	2	1.85	30.32	9.583	0
									LVRPFHATFR		ASTEI02741-PA	1	622.353	1243.7	2	2.79	38.03	-5.719	0
ASTEI02153-PA	43.19	7	7	12	213	24.181	7.11	Thorax,Antennae,Ovary,Fatbody,Salivary glands
									NWWDDEFDRPLWNSR		ASTEI02153-PA	1	679.304	2035.9	3	1.03	18.52	-3.51	0
									LLDQHFGGGVTADDLLNVIASVPDRR		ASTEI02153-PA	1	695.371	2778.46	4	3.16	22	3.094	1
									sIVPIFFR	N-Term(Acetyl)	ASTEI02153-PA	3	510.8	1020.59	2		36.26	5.47	0
									DSGSTVNVTGDKFQINLDVQQFSPEEISVK		ASTEI02153-PA	2	1094.54	3281.6	3	3.77	38.46	-4.596	1
									AIPITQTGQPVK		ASTEI02153-PA	2	626.865	1252.72	2	1.45	51.67	-2.258	0
									AIPITQTGQPVKK		ASTEI02153-PA	2	690.915	1380.82	2	2.63	50.33	0.692	1
									LLDQHFGGGVTADDLLNVIASVPDR		ASTEI02153-PA	1	874.791	2622.36	3	4.37	61.49	2.765	0
ASTEI04461-PA	34.75	8	8	84	282	31.708	5.11	Midgut,Thorax,Salivary glands,Brain,Proboscis,Male accessory glands,Antennae,Fatbody,Larvae,Ovary,Pupae,Malpighian tubules,Legs,Head,Maxillary palps
									IRPTVQEDGGDIIFMGFDDGIVK		ASTEI04461-PA	7	841.427	2522.26	3	4.5	58.89	2.241	0
									IRPTVQEDGGDIIFmGFDDGIVK	M15(Oxidation)	ASTEI04461-PA	1	846.766	2538.28	3	4.82	50.82	11.131	0
									FLPGVSVLEK		ASTEI04461-PA	32	544.823	1088.64	2	1.26	41.51	3.006	0
									QKEEPPAENKT		ASTEI04461-PA	1	424.214	1270.63	3	3.54	23.9	0.275	2
									QKEEPPAENK		ASTEI04461-PA	1	585.292	1169.58	2		18.38	-2.811	1
									aVFFGSDFVTISk	N-Term(iTRAQ4plex); K13(iTRAQ4plex)	ASTEI04461-PA	2	853.475	1705.94	2	4.38	65.78	1.555	0
									fLPGVSVLEk	N-Term(iTRAQ4plex); K10(iTRAQ4plex)	ASTEI04461-PA	1	688.924	1376.84	2	3.23	44.8	1.295	0
									AVFFGSDFVTISK		ASTEI04461-PA	20	709.368	1417.73	2	1.67	66.4	-4.913	0
									MQGScSScPSSIVTLK	C5(Carbamidomethyl); C8(Carbamidomethyl)	ASTEI04461-PA	9	871.4	1741.79	2	2.95	74.86	0.752	0
									GQTmDFPSVSSAQcSPLAK	M4(Oxidation); C14(Carbamidomethyl)	ASTEI04461-PA	1	1013.97	2026.93	2	4.12	91.83	5.117	0
									QEDAEWR		ASTEI04461-PA	1	467.203	933.398	2	2.34	56.45	-8.846	0
									mQGScSScPSSIVTLK	M1(Oxidation); C5(Carbamidomethyl); C8(Carbamidomethyl)	ASTEI04461-PA	4	879.405	1757.8	2	4.06	110.27	9.193	0
									GQTMDFPSVSSAQcSPLAK	C14(Carbamidomethyl)	ASTEI04461-PA	4	1005.96	2010.92	2	3.76	83.69	-3.806	0
ASTEI07409-PA	39.8	12	12	34	304	34.13	6.65	Midgut,Salivary glands,Brain,Proboscis,Male accessory glands,Antennae,Ovary,Fatbody,Malpighian tubules
									DLPNEYK		ASTEI07409-PA	1	439.716	878.426	2	1.3	28.81	0.152	0
									EALILAAQNNKR		ASTEI07409-PA	1	670.885	1340.76	2	3.21	45.21	-1.25	1
									QAITFISEGcR	C10(Carbamidomethyl)	ASTEI07409-PA	3	641.326	1281.64	2	2.55	56	15.337	0
									IGTVTmAIcAK	M6(Oxidation); C9(Carbamidomethyl)	ASTEI07409-PA	2	590.806	1180.61	2	2.94	66.59	-1.462	0
									TKFDTVQEFHSTLQAAVGAMR		ASTEI07409-PA	1	779.725	2337.16	3	2.17	66.88	-2.045	1
									DDTISPGIAAIK		ASTEI07409-PA	4	600.827	1200.65	2	1.46	48.23	-0.889	0
									IGTVTMAIcAK	C9(Carbamidomethyl)	ASTEI07409-PA	1	582.809	1164.61	2	2.66	59.43	-0.293	0
									FDDKTMDEVR		ASTEI07409-PA	1	419.193	1255.56	3	2.17	27.88	1.248	1
									EALILAAQNNK		ASTEI07409-PA	4	592.835	1184.66	2	1.85	35.11	-0.861	0
									TKFDTVQEFHSTLQAAVGAmR	M20(Oxidation)	ASTEI07409-PA	1	785.053	2353.14	3	2.22	12.87	-6.665	1
									KPFYALVESFK		ASTEI07409-PA	2	664.865	1328.72	2	3.96	71.9	-1.6	0
									TLLmVLEK	M4(Oxidation)	ASTEI07409-PA	1	481.783	962.559	2	1.93	56.69	0.056	0
									TDKPMTSVVSGTELFSR		ASTEI07409-PA	1	927.969	1854.93	2	3.71	49.96	1.778	0
									TLLMVLEK		ASTEI07409-PA	7	473.787	946.566	2	1.29	43.59	1.907	0
ASTEI01604-PA	9.5	3	3	3	621	68.926	8.82	Salivary glands,Testis
									IDFFNSIGK		ASTEI01604-PA	1	520.775	1040.54	2	2	34.59	0.952	0
ASTEI01549-PA	5.32	2	2	6	357	37.158	5.94	Midgut,Salivary glands
									ADIAMDDQVSAEHGR		ASTEI01549-PA	4	538.911	1614.72	3	2.39	69.55	0.11	0
									DKADIAMDDQVSAEHGR		ASTEI01549-PA	1	619.951	1857.84	3	2.97	100.67	-0.48	1
									DKADIAmDDQVSAEHGR	M7(Oxidation)	ASTEI01549-PA	1	625.285	1873.84	3	2.52	17.96	3.182	1
ASTEI09907-PA	9.77	8	8	17	1024	112.317	5.55	Midgut,Salivary glands,Brain,Larvae,Pupae
									aVITPANQPVR	N-Term(iTRAQ4plex)	ASTEI09907-PA	1	655.39	1309.77	2	3.43	22.06	0.945	0
									GLAPEASELAGIEK		ASTEI09907-PA	2	692.869	1384.73	2	2.74	87.05	-0.309	0
									SSDDLGIVR		ASTEI09907-PA	2	481.251	961.495	2	2.36	70.93	-0.222	0
									TTVcQNDcSGHGVcNAETR	C4(Carbamidomethyl); C8(Carbamidomethyl); C14(Carbamidomethyl)	ASTEI09907-PA	1	722.63	2165.88	3	5.11	52.45	-0.153	0
									ITVVQEK		ASTEI09907-PA	2	408.745	816.482	2	1.73	32.14	-0.81	0
									ASTLEEcVR	C7(Carbamidomethyl)	ASTEI09907-PA	1	532.756	1064.5	2	1.89	27.15	0.288	0
									LPNHEAILDGSASSDDAK		ASTEI09907-PA	1	613.962	1839.87	3	3.06	46.49	0.454	0
									AVITPANQPVR		ASTEI09907-PA	6	583.337	1165.67	2	1.31	55.26	-1.127	0
									IAEDDGEESLLGK		ASTEI09907-PA	1	688.333	1375.66	2	3.24	67.51	-0.674	0
ASTEI09425-PA	25.41	5	5	14	181	21.421	9.45	Midgut,Brain,Ovary,Malpighian tubules,Salivary glands,Legs
									TLEDFVTWVDGSAIQK		ASTEI09425-PA	2	904.957	1808.91	2	2.92	50.16	0.108	0
									vGVEVVkDPAFLVPR	N-Term(iTRAQ4plex); K7(iTRAQ4plex)	ASTEI09425-PA	1	638.386	1913.14	3	3	17.47	-0.953	1
									VGVEVVK		ASTEI09425-PA	3	365.229	729.451	2		36.47	0.149	0
									VGVEVVKDPAFLVPR		ASTEI09425-PA	3	542.318	1624.94	3	2.88	65.48	-0.806	1
									LPLVLVR		ASTEI09425-PA	4	405.287	809.566	2	1.76	43.47	6.932	0
									EDYTAYNK		ASTEI09425-PA	1	502.221	1003.43	2	1.2		-1.498	0
ASTEI05980-PA	15.25	4	4	5	341	37.093	5.77	Brain,Salivary glands,Midgut
									ILGVEAVFGK		ASTEI05980-PA	1	516.809	1032.61	2	2.1	52.21	2.662	0
									FSAGDADHLEK		ASTEI05980-PA	1	397.188	1189.55	3	0.93	32.38	-0.347	0
									iLGVEAVFGk	N-Term(iTRAQ4plex); K10(iTRAQ4plex)	ASTEI05980-PA	1	660.91	1320.81	2	4.33	63.32	-0.156	0
									GLQNLASSR		ASTEI05980-PA	1	473.259	945.512	2	2.65	65.79	0.47	0
ASTEI08535-PA	48.88	16	16	49	446	50.181	6.71	Midgut,Brain,Thorax,Salivary glands,Male accessory glands,Antennae,Ovary,Fatbody,Malpighian tubules
									RWWSVFVPR		ASTEI08535-PA	2	616.842	1232.68	2	2.38	29.13	6.609	1
									TMANAAYAVIAGK		ASTEI08535-PA	3	640.836	1280.66	2	1.63	79.24	-2.006	0
									YYcSEASR	C3(Carbamidomethyl)	ASTEI08535-PA	1	518.214	1035.42	2	1.6	40.53	0.644	0
									FFEcPAK	C4(Carbamidomethyl)	ASTEI08535-PA	1	449.71	898.412	2	1.17	54.77	-0.914	0
									DKYWYTASLR		ASTEI08535-PA	1	651.832	1302.66	2	2.49	17.05	6.381	1
									RYVEELANLPDALIVGGGDGTLSEAVSGMK		ASTEI08535-PA	1	1021.19	3061.56	3	1.69	11.9	4.017	1
									YVEELANLPDALIVGGGDGTLSEAVSGMK		ASTEI08535-PA	1	969.154	2905.45	3	2.48	28.75	-0.667	0
									QDGTQcPIGVLPLGR	C6(Carbamidomethyl)	ASTEI08535-PA	1	805.919	1610.83	2	3.88	99.4	-0.169	0
									LKVEESDPELYYSIDNEAYEVRPVR		ASTEI08535-PA	1	754.129	3013.49	4	5.2	20.1	5.223	1
									IGLNQRPPK		ASTEI08535-PA	6	341.542	1022.61	3	2.56	41	1.888	0
									IAYTEPcSGcSNcYK	C7(Carbamidomethyl); C10(Carbamidomethyl); C13(Carbamidomethyl)	ASTEI08535-PA	3	905.366	1809.72	2	1.92	33.58	0.233	0
									IEVLPSVADETPPEKPVYAVGALQWGAFR		ASTEI08535-PA	5	1047.22	3139.65	3	2.14	36.91	1.994	0
									HELEVDPSELVIK		ASTEI08535-PA	2	503.272	1507.8	3	2.5	39.87	1.178	0
									VLVLLNPAANR		ASTEI08535-PA	5	590.364	1179.72	2	2.7	63.03	-0.318	0
									TVELFPER		ASTEI08535-PA	5	495.766	990.524	2	1.49	27.87	-1.501	0
									LFSAEGANNSDLENVR		ASTEI08535-PA	11	868.417	1735.83	2	2.28	114.83	1.607	0
ASTEI04468-PA	19.35	3	3	12	217	21.744	5.48	Midgut,Fatbody,Malpighian tubules,Maxillary palps
									MAVAPAPLAPAAATGNLR		ASTEI04468-PA	3	846.466	1691.92	2	3.66	96.22	-1.476	0
									DVATNADVLGR		ASTEI04468-PA	1	565.795	1130.58	2	2.68	70	1.65	0
									mAVAPAPLAPAAATGNLR	M1(Oxidation)	ASTEI04468-PA	1	854.467	1707.93	2	3.92	104.4	2.944	0
ASTEI02556-PA	33.3	26	26	105	955	108.287	8.81	Midgut,Brain,Salivary glands,Fatbody,Ovary,Malpighian tubules
									fSELQPEk	N-Term(iTRAQ4plex); K8(iTRAQ4plex)	ASTEI02556-PA	1	633.352	1265.7	2	3.17	23.96	-0.452	0
									QTMENLGLDMSGTDETNFAK		ASTEI02556-PA	1	1101.49	2201.97	2	3.89	82.09	0	0
									FSELQPEK		ASTEI02556-PA	2	489.251	977.495	2	1.69	18.14	1.375	0
									nYTTIPEEER	N-Term(iTRAQ4plex)	ASTEI02556-PA	1	698.35	1395.69	2	3.06	26.21	3.694	0
									NVIEMQAITAMAHLR		ASTEI02556-PA	2	849.446	1697.88	2	1.54	70.02	1.561	0
									ImVVPPAK	M2(Oxidation)	ASTEI02556-PA	2	435.759	870.51	2	2.3	45.45	-2.278	0
									LTQIIQDFPK		ASTEI02556-PA	12	601.843	1202.68	2	2.24	82.59	0.427	0
									qASNLTYLEEVR	N-Term(iTRAQ4plex)	ASTEI02556-PA	1	783.916	1566.83	2	3.22	36.38	0.743	0
									SVIPAVGGPK		ASTEI02556-PA	4	462.779	924.551	2	1.61	64.21	-0.631	0
									HLIDTVAK		ASTEI02556-PA	3	448.763	896.519	2	3.59	50.65	-0.709	0
									LFDSIKPLFANKPLVLVLNK		ASTEI02556-PA	3	568.098	2269.37	4	4.12	36.77	0.088	0
									QASNLTYLEEVR		ASTEI02556-PA	5	711.865	1422.72	2	3.9	101.31	0.055	0
									AFIDIMLSK		ASTEI02556-PA	1	519.288	1037.57	2	1.49	35.16	-1.105	0
									QQIIEALSEDR		ASTEI02556-PA	1	651.338	1301.67	2	2.91	81.66	-0.397	0
									KLDGVLNR		ASTEI02556-PA	1	457.775	914.543	2	2.54	36.83	1.018	1
									NYTTIPEEER		ASTEI02556-PA	3	626.296	1251.59	2	1.97		0.228	0
									LEELEREEGLR		ASTEI02556-PA	5	686.856	1372.7	2	1.42	41.64	-0.925	1
									DEKDRPAcIPEAVLAAR	C8(Carbamidomethyl)	ASTEI02556-PA	4	637.663	1910.97	3	4.16	36.89	0.027	1
									MEAGFYEPPPLNLDETLLEIR		ASTEI02556-PA	3	1224.11	2447.22	2	4.77	123.08	0.277	0
									LPSIDPYTR		ASTEI02556-PA	7	531.284	1061.56	2	2.44	42.29	-0.874	0
									DRPAcIPEAVLAAR	C5(Carbamidomethyl)	ASTEI02556-PA	3	769.909	1538.81	2	4.49	61.26	0.221	0
									FPYTSSVYYQcNVK	C11(Carbamidomethyl)	ASTEI02556-PA	1	878.406	1755.81	2	3.73	69.55	0.434	0
									WQVIDTPGILDHPLEER		ASTEI02556-PA	6	673.351	2018.04	3	5.7	73.35	1.368	0
									LALGQLNTAR		ASTEI02556-PA	10	528.811	1056.62	2	2.64	57.38	-1.209	0
									ATGMPIKR		ASTEI02556-PA	1	437.253	873.499	2	2.21	42.64	1.262	1
									LDDVHPFYADLMNVLYDKDHYK		ASTEI02556-PA	2	904.428	2711.27	3	4.94	28.33	-4.12	1
									YTQQNFHDR		ASTEI02556-PA	2	604.775	1208.54	2	2.93	82.78	-1.391	0
									ADVDVQPYAFTTK		ASTEI02556-PA	10	727.862	1454.72	2	3.87	64.45	0.582	0
									TIIVcGFPNVGK	C5(Carbamidomethyl)	ASTEI02556-PA	8	652.853	1304.7	2	2.81	18.61	-3.472	0
ASTEI08666-PA	62.46	75	75	458	1689	182.024	5.69	Midgut,Salivary glands,Thorax,Proboscis,Male accessory glands,Antennae,Fatbody,Larvae,Ovary,Pupae,Malpighian tubules,Other,Heamolymph,Legs,Maxillary palps,Testis
									TTSSAISENHSYQHQESYIEQVSSVSK		ASTEI08666-PA	2	757.356	3026.4	4	2.6	12.94	1.667	0
									iFGPGGVVPEHSIR	N-Term(iTRAQ4plex)	ASTEI08666-PA	4	536.971	1608.9	3	3.8	20.75	0.688	0
									HTSIVAYGPGLK		ASTEI08666-PA	4	621.845	1242.68	2	3.43	54.98	-1.778	0
									FNNDKNLTYSVSYIPK		ASTEI08666-PA	3	951.986	1902.96	2	3.04	44.02	2.689	1
									mVQSVPVNQEYGKK	M1(Oxidation)	ASTEI08666-PA	1	541.612	1622.82	3	3.06	39.32	-0.014	1
									tGGVIVGkPTAFTVDATR	N-Term(iTRAQ4plex); K8(iTRAQ4plex)	ASTEI08666-PA	2	693.401	2078.19	3	4.07	31.61	1.004	0
									FQIDAPK		ASTEI08666-PA	6	409.724	818.44	2	1.93	31.61	-0.447	0
									VTASGPGLLPDGVVVGK		ASTEI08666-PA	28	783.449	1565.89	2	5.47	87.99	0.927	0
									GDGVYGVTYVAPK		ASTEI08666-PA	6	663.341	1325.67	2	2.83	38.67	1.098	0
									LENVSVALK		ASTEI08666-PA	1	486.79	972.572	2	2.45	73.61	-0.414	0
									QYIQQTASEEFLVR		ASTEI08666-PA	1	856.423	1711.84	2	3.35	85.01	-15.756	0
									LVPSDSADDVFR		ASTEI08666-PA	16	660.829	1320.65	2	2.25	73.64	6.303	0
									IVSHSEASDVDIDIIEK		ASTEI08666-PA	2	623.987	1869.95	3	4.63	61.51	1.058	0
									IVNIDSSDIVDcK	C12(Carbamidomethyl)	ASTEI08666-PA	2	739.364	1477.72	2	2.96	94.82	0.846	0
									MVQSVPVNQEYGK		ASTEI08666-PA	5	739.869	1478.73	2	1.18	39.92	0.104	0
									DGFFDIFYVLK		ASTEI08666-PA	4	682.35	1363.69	2	1.79	45.64	0.152	0
									GAGQGGLGVTVEGPcEAAINcR	C15(Carbamidomethyl); C21(Carbamidomethyl)	ASTEI08666-PA	1	1087.01	2173.01	2	4.89	113.57	-0.94	0
									KLDATTYEAQYIPLK		ASTEI08666-PA	2	877.474	1753.94	2	5.65	81.95	2.325	1
									mVQSVPVNQEYGK	M1(Oxidation)	ASTEI08666-PA	2	747.866	1494.72	2	3.37	62.45	-0.252	0
									vTASGPGLLPDGVVVGk	N-Term(iTRAQ4plex); K17(iTRAQ4plex)	ASTEI08666-PA	2	927.553	1854.1	2	4.23	72.25	2.35	0
									QTYFDITTK		ASTEI08666-PA	2	558.782	1116.56	2	2.05	26.97	-0.888	0
									dPGDYDLDIk	N-Term(iTRAQ4plex); K10(iTRAQ4plex)	ASTEI08666-PA	1	719.868	1438.73	2	3.49	47.6	-0.539	0
									LIALIEVLSQKR		ASTEI08666-PA	4	461.635	1382.89	3	4.23	47.72	12.615	1
									QVGLHSVNVFFcGQQIR	C12(Carbamidomethyl)	ASTEI08666-PA	4	663.677	1989.02	3	4.42	41.69	2.679	0
									IGVTLSSSEGKPITAQVQDK		ASTEI08666-PA	1	686.707	2058.11	3	4.24		-0.533	0
									GTPEVIILDPANHK		ASTEI08666-PA	8	752.41	1503.81	2	1.69	70.84	-2.56	0
									FLEVEGIK		ASTEI08666-PA	3	467.766	934.524	2		10.43	-0.065	0
									GNVDVAVHNPNGNPEK		ASTEI08666-PA	1	830.906	1660.8	2	5.77	77.29	-0.056	0
									DGScDVEYMPTEPGEYDVTIR	C4(Carbamidomethyl)	ASTEI08666-PA	2	1217.02	2433.03	2	6.11	64.49	3.545	0
									TGGVIVGKPTAFTVDATR		ASTEI08666-PA	15	597.331	1789.98	3	5.08	43.28	-1.514	0
									IFGPGGVVPEHSIR		ASTEI08666-PA	12	732.901	1464.8	2	1.73	56.56	-0.769	0
									VGDDVDRSK		ASTEI08666-PA	1	495.746	990.486	2	1.4	27.38	0.527	1
									SPHIAQVLPK		ASTEI08666-PA	4	545.325	1089.64	2	1.71	38.65	1.322	0
									AAGNGLLEVNLVHEESK		ASTEI08666-PA	2	593.981	1779.93	3	2.62	10.93	1.907	0
									sPYEVQVESQAGDASk	N-Term(iTRAQ4plex); K16(iTRAQ4plex)	ASTEI08666-PA	1	991.999	1982.99	2	3.51	75.78	-0.166	0
									YHPTAPGEYAVHILcDNEDIPK	C15(Carbamidomethyl)	ASTEI08666-PA	9	847.073	2539.2	3	5.68	45.47	4.571	0
									YHPTAPGEYAVHILcDNEDIPKSPHIAQVLPK	C15(Carbamidomethyl)	ASTEI08666-PA	1	722.768	3609.81	5	2.38		-0.983	1
									LKPGAPLRPR		ASTEI08666-PA	1	368.906	1104.7	3	1.79	10.04	1.727	0
									VNDDDVTFR		ASTEI08666-PA	5	540.752	1080.5	2	2.97	66.7	0.2	0
									IINQTIANLESDLSDGLR		ASTEI08666-PA	31	986.523	1972.04	2	5.45	93.31	1.89	0
									vNDDDVTFR	N-Term(iTRAQ4plex)	ASTEI08666-PA	1	612.802	1224.6	2	3.88	25.64	-0.133	0
									VQFFGPWLEPGVKPNAATHFNVDAR		ASTEI08666-PA	7	700.116	2797.44	4	7.1	19.01	6.898	0
									VTVSSPVDVSK		ASTEI08666-PA	9	559.309	1117.61	2	2.31	45.36	0.811	0
									AYGPGLEGALTDK		ASTEI08666-PA	11	646.329	1291.65	2	3	81.1	-1.355	0
									sPFEVTVGPQk	N-Term(iTRAQ4plex); K11(iTRAQ4plex)	ASTEI08666-PA	1	738.919	1476.83	2	2.73	51.97	0.35	0
									AYGPGLEGALTDKLATFTVETR		ASTEI08666-PA	3	770.74	2310.21	3	4.74	61.44	3.891	1
									SPYEVQVESQAGDASK		ASTEI08666-PA	23	847.899	1694.79	2	4.97	89.57	2.125	0
									LVPDLPINNFTSDWTNGK		ASTEI08666-PA	9	1016.01	2031.02	2	3.24	65.83	1.305	0
									qTYFDITTk	N-Term(iTRAQ4plex); K9(iTRAQ4plex)	ASTEI08666-PA	1	702.884	1404.76	2	2.81	56.62	-0.115	0
									DPGDYDLDIK		ASTEI08666-PA	3	575.767	1150.53	2	3.27	64.56	0.196	0
									DVLGSPFLLQAIPTGEADK		ASTEI08666-PA	7	986.024	1971.04	2	3.02	85.73	-1.392	0
									gTPEVIILDPANHk	N-Term(iTRAQ4plex); K14(iTRAQ4plex)	ASTEI08666-PA	1	896.515	1792.02	2	3.87	72.52	0.835	0
									GAGAGGLSLAIEGPSEAK		ASTEI08666-PA	9	792.914	1584.82	2	2.56	21.29	-1.36	0
									kLDATTYEAQYIPLkEGR	N-Term(iTRAQ4plex); K1(iTRAQ4plex); K15(iTRAQ4plex)	ASTEI08666-PA	1	632.859	2528.41	4	3.74	47.2	2.639	2
									SPFEVTVGPQK		ASTEI08666-PA	7	594.817	1188.63	2	1.92	50.68	0.147	0
									QLIRPEEMVNPNIDEQSMMTYLSQYPNAK		ASTEI08666-PA	1	1147.22	3439.64	3	5.4	78.55	1.186	0
									DIPKSPYEVQVESQAGDASK		ASTEI08666-PA	1	716.687	2148.05	3	1.95		-0.277	1
									VSYTAPSAEPVTVEVNYGGVAVPQSPFR		ASTEI08666-PA	1	1461.24	2921.48	2	1.15	36.76	3.671	0
									hTIELLYDNVPVPGSPFVVNVk	N-Term(iTRAQ4plex); K22(iTRAQ4plex)	ASTEI08666-PA	1	909.179	2725.52	3	4.45	51.67	1.62	0
									iTQTESGVk	N-Term(iTRAQ4plex); K9(iTRAQ4plex)	ASTEI08666-PA	1	625.864	1250.72	2	1.87		0.538	0
									ALPASLPAK		ASTEI08666-PA	1	434.269	867.53	2	1.6	47.67	0.366	0
									VYGPGIEHGQVYEGLPAQFFIDcGEAGPGK	C23(Carbamidomethyl)	ASTEI08666-PA	7	1064.84	3192.51	3	4.17	31.91	0.256	0
									VVVNESTRPEK		ASTEI08666-PA	3	629.344	1257.68	2	2.55	35.85	1.015	0
									IGVTLSSSEGKPITAQVQDKGDGVYGVTYVAPK		ASTEI08666-PA	1	1122.26	3364.76	3	5.66	45.45	0.116	1
									DVLGSPFLLQAIPTGEADKcK	C20(Carbamidomethyl)	ASTEI08666-PA	1	753.73	2259.18	3	2.91	36.77	2.475	1
									gAGAGGLSLAIEGPSEAk	N-Term(iTRAQ4plex); K18(iTRAQ4plex)	ASTEI08666-PA	1	937.02	1873.03	2	4.78	90.26	3.203	0
									LIALIEVLSQK		ASTEI08666-PA	8	613.89	1226.77	2	2.17	55.56	0.288	0
									IMYTPFEAGR		ASTEI08666-PA	3	592.793	1184.58	2	3.21	48.27	0.962	0
									AGSAPLEVK		ASTEI08666-PA	3	436.247	871.488	2	1.87	26.49	-0.795	0
									ILVLYGGQEIPK		ASTEI08666-PA	6	665.391	1329.78	2	3.19	30.01	-1.533	0
									VAPVcDPR	C5(Carbamidomethyl)	ASTEI08666-PA	2	457.232	913.456	2	1.56	42.66	-0.227	0
									MVQSVPVNQEYGKK		ASTEI08666-PA	3	803.916	1606.83	2	2.8	42.29	-0.436	1
									vTVSSPVDVSk	N-Term(iTRAQ4plex); K11(iTRAQ4plex)	ASTEI08666-PA	1	703.411	1405.82	2	4.28	60.17	0.714	0
									DAVQNAAEAMGLADDWLNVR		ASTEI08666-PA	3	720.345	2159.02	3	5.23	104.53	0.843	0
									AVDNVEEQVAK		ASTEI08666-PA	4	601.305	1201.6	2		17.71	-3.223	0
									EGSVITANVR		ASTEI08666-PA	4	523.289	1045.57	2	2.7	30.51	7.069	0
									FGGQNIPNGTFTIK		ASTEI08666-PA	1	747.392	1493.78	2	4.24	53.1	1.1	0
									HTIELLYDNVPVPGSPFVVNVK		ASTEI08666-PA	13	813.114	2437.33	3	6.27	34.67	5.778	0
ASTEI06663-PA	74.43	28	28	497	438	49.166	6.09	Midgut,Brain,Salivary glands,Thorax,Proboscis,Male accessory glands,Antennae,Fatbody,Larvae,Ovary,Pupae,Malpighian tubules,Other,Heamolymph,Legs,Head,Maxillary palps,Testis
									VPPNGLVIYcGTIVTEEGKEK	C10(Carbamidomethyl)	ASTEI06663-PA	4	768.405	2303.2	3	5.93	71.11	1.731	1
									gNGTSMISLIIPPkDQISR	N-Term(iTRAQ4plex); K14(iTRAQ4plex)	ASTEI06663-PA	1	772.439	2315.3	3	4.68	46.29	0.623	1
									FHTEALTALLADDNK		ASTEI06663-PA	12	553.617	1658.84	3	3.96	64.7	-0.348	0
									TELSQSDMFDPR		ASTEI06663-PA	26	713.32	1425.63	2	2.14	58.66	0.754	0
									SQEGSQFVR		ASTEI06663-PA	10	519.254	1037.5	2	2.49	34.09	-0.771	0
									LVDVSYGGENGFNQAIELAAESLQNVK		ASTEI06663-PA	47	1433.22	2865.43	2	2.21	38.68	1.172	0
									fGFIVmDGNGALFGTLQGNTR	N-Term(iTRAQ4plex); M6(Oxidation)	ASTEI06663-PA	1	792.405	2375.2	3	3.77	53.25	2.324	0
									cFGATLEIITDKSQEGSQFVR	C1(Carbamidomethyl)	ASTEI06663-PA	4	796.06	2386.17	3	5.49	54.83	-1.882	1
									gFGGIGGILR	N-Term(iTRAQ4plex)	ASTEI06663-PA	3	545.829	1090.65	2	3.81	54.6	1.874	0
									ALELGSVETLIcWENLDIQR	C12(Carbamidomethyl)	ASTEI06663-PA	9	1180.1	2359.2	2	4.42	76.28	-0.413	0
									fTVDLPk	N-Term(iTRAQ4plex); K7(iTRAQ4plex)	ASTEI06663-PA	1	554.337	1107.67	2	2.21		1.288	0
									KVAEVATQLFITNDKPNIAGLILAGSADFK		ASTEI06663-PA	3	1048.92	3144.74	3	2.98	17.73	2.352	1
									YFDEISQDTGKYcFGVEDTLK	C13(Carbamidomethyl)	ASTEI06663-PA	5	1258.07	2515.14	2	3.5	83.59	1.421	1
									LSVLGAITSVQHR		ASTEI06663-PA	71	460.94	1380.81	3	5.08	59.69	6.306	0
									YcFGVEDTLK	C2(Carbamidomethyl)	ASTEI06663-PA	14	616.286	1231.57	2	2.2	58.34	-0.845	0
									NHASATSTTVLHLTPEQEK		ASTEI06663-PA	18	688.685	2064.04	3	3.83	21.69	2.034	0
									FTVDLPK		ASTEI06663-PA	39	410.236	819.464	2	1.65	54.46	3.26	0
									tELSQSDMFDPR	N-Term(iTRAQ4plex)	ASTEI06663-PA	1	785.372	1569.74	2	4.65	55.28	2.465	0
									GNGTSMISLIIPPKDQISR		ASTEI06663-PA	10	1014.05	2027.1	2	2.7	61.54	1.573	1
									GFGGIGGILR		ASTEI06663-PA	56	473.776	946.545	2	2.49	43.48	-1.567	0
									VAEVATQLFITNDKPNIAGLILAGSADFK		ASTEI06663-PA	1	1006.22	3016.65	3	2.77	35.47	3.989	0
									VPPNGLVIYcGTIVTEEGK	C10(Carbamidomethyl)	ASTEI06663-PA	1	1023.53	2046.06	2	3.37	61.83	2.372	0
									YFDEISQDTGK		ASTEI06663-PA	34	651.798	1302.59	2	3.11	62.33	2.253	0
									tELSQSDmFDPR	N-Term(iTRAQ4plex); M8(Oxidation)	ASTEI06663-PA	2	793.37	1585.73	2	2.54	53.21	2.799	0
									lSVLGAITSVQHR	N-Term(iTRAQ4plex)	ASTEI06663-PA	5	762.954	1524.9	2	4.74	65.45	1.668	0
									VDFQSMQLDELDNDcFDLEDY	C15(Carbamidomethyl)	ASTEI06663-PA	1	871.022	2611.05	3	1.86	11.04	0.559	0
									yFDEISQDTGk	N-Term(iTRAQ4plex); K11(iTRAQ4plex)	ASTEI06663-PA	1	795.898	1590.79	2	3.96	51.83	0.295	0
									sFDETSADR	N-Term(Acetyl)	ASTEI06663-PA	6	535.222	1069.44	2		30.47	-5.613	0
									KVNIDFEPFKPINTSLYLcDNK	C19(Carbamidomethyl)	ASTEI06663-PA	5	664.592	2655.35	4	2.55		-0.563	1
									GNGTSmISLIIPPKDQISR	M6(Oxidation)	ASTEI06663-PA	1	681.701	2043.09	3	4.67	40.57	-1.155	1
									FTVDLPKK		ASTEI06663-PA	2	474.28	947.553	2	1.84	41.87	-3.428	1
									TELSQSDmFDPR	M8(Oxidation)	ASTEI06663-PA	20	721.318	1441.63	2	1.45	41.7	1.394	0
									NHASATSTTVLHLTPEQEKDK		ASTEI06663-PA	48	769.726	2307.16	3	4.58	43.76	2.785	1
									vNRLSVLGAITSVQHR	N-Term(iTRAQ4plex)	ASTEI06663-PA	1	632.042	1894.11	3	3.59	21.72	1.139	1
									VNIDFEPFKPINTSLYLcDNK	C18(Carbamidomethyl)	ASTEI06663-PA	8	843.091	2527.26	3	7.47	34.21	1.249	0
ASTEI09734-PA	29.68	19	19	78	748	83.506	6.54	Brain,Antennae,Salivary glands
									ANELASSVLK		ASTEI09734-PA	1	516.292	1031.58	2	2.4	43.4	2.926	0
									LPLAVVQFR		ASTEI09734-PA	16	521.825	1042.64	2	2.05	54.72	2.189	0
									TFADFLAGRK		ASTEI09734-PA	1	563.307	1125.61	2	2.57	50.17	1.599	1
									SLAHDVSFR		ASTEI09734-PA	1	516.267	1031.53	2	2.32	24.83	0.11	0
									WLWPYSVTVESQGYK		ASTEI09734-PA	1	921.962	1842.92	2		38.87	5.969	0
									DcGPLYGR	C2(Carbamidomethyl)	ASTEI09734-PA	2	469.214	937.42	2	1.89	41.06	0.455	0
									EKANELASSVLK		ASTEI09734-PA	4	430.241	1288.71	3	1.37	30.72	-1.81	1
									ALDEIPPDPFYDVSDITIGAAK		ASTEI09734-PA	11	1174.09	2347.17	2	3.13	85.15	-0.227	0
									LPVDAFK		ASTEI09734-PA	1	395.229	789.451	2	1.12	52.84	0.138	0
									NANTQFR		ASTEI09734-PA	1	425.712	850.417	2	2.02	43.06	0.133	0
									HVcDRESTFcLLSELDASKPR	C3(Carbamidomethyl); C10(Carbamidomethyl)	ASTEI09734-PA	1	630.806	2520.2	4	5.93	40.89	2.649	1
									SQLTNTVTLGLIFLPK		ASTEI09734-PA	1	873.014	1745.02	2	2.38	59.81	-0.502	0
									NFLSTYWR		ASTEI09734-PA	8	543.772	1086.54	2	2.03	25.26	0.729	0
									QDDGLLLAVGIASPR		ASTEI09734-PA	1	762.922	1524.84	2	3.02	83.88	-0.761	0
									ESTFcLLSELDASKPR	C5(Carbamidomethyl)	ASTEI09734-PA	3	926.959	1852.91	2	2.99	85.53	-0.114	0
									EKANELASSVLKQDDGLLLAVGIASPR		ASTEI09734-PA	1	699.39	2794.54	4	3.04		3.18	2
									LYTQLEYLK		ASTEI09734-PA	9	585.823	1170.64	2	2.36	37.45	-0.705	0
									RLYTQLEYLK		ASTEI09734-PA	1	663.874	1326.74	2		33.94	-0.288	1
									TFADFLAGR		ASTEI09734-PA	14	499.26	997.513	2	2.07	62.47	2.416	0
ASTEI04177-PA	25.69	3	3	3	109	12.187	8.18	Brain
									NLGIYNLR		ASTEI04177-PA	1	481.774	962.541	2	1.33	31.32	-0.407	0
									DLQVLEGTEALLR		ASTEI04177-PA	1	728.904	1456.8	2	2.5	65.59	0.283	0
									YSVLADR		ASTEI04177-PA	1	412.219	823.431	2	1.63	46.77	0.473	0
ASTEI00063-PA	29.41	2	2	2	102	11.572	8.12	Midgut,Legs
									AIYcDPPYFcK	C4(Carbamidomethyl); C10(Carbamidomethyl)	ASTEI00063-PA	1	717.315	1433.62	2	1.88	15.99	0.59	0
ASTEI09385-PA	6.3	8	8	38	1587	173.807	8.43	Midgut,Brain,Larvae,Ovary,Pupae,Fatbody,Malpighian tubules,Legs,Maxillary palps,Testis
									DTAEVEAALHEK		ASTEI09385-PA	3	656.823	1312.64	2	3.94	51.4	0.64	0
									TLEDIENHFR		ASTEI09385-PA	10	425.211	1273.62	3	2.69	36.95	1.773	0
									SLQEIEDYFR		ASTEI09385-PA	2	650.314	1299.62	2	1.96	44.81	-0.542	0
									aELDALQDNIAR	N-Term(iTRAQ4plex)	ASTEI09385-PA	1	736.897	1472.79	2	4.31	65.68	3.34	0
									sPTHAVLTQLTR	N-Term(iTRAQ4plex)	ASTEI09385-PA	1	489.951	1467.84	3	3.86	21.56	-1.042	0
									AELDALQDNIAR		ASTEI09385-PA	13	664.842	1328.68	2	3.63	56.95	-2.169	0
									TLQDIEDYFR		ASTEI09385-PA	1	650.315	1299.62	2	2.24	54.43	0.304	0
									SSDLPEVEmK	M9(Oxidation)	ASTEI09385-PA	1	575.768	1150.53	2	2.04	27.57	-0.518	0
									SSDLPEVEMK		ASTEI09385-PA	4	567.771	1134.54	2	2.36	13.63	0.372	0
									tLEDIENHFR	N-Term(iTRAQ4plex)	ASTEI09385-PA	1	473.244	1417.72	3	5.3	48.53	-0.655	0
ASTEI10209-PA	6.49	6	6	11	1403	155.302	8.48	Fatbody,Malpighian tubules,Legs
									TLFGNVAEYLTELR		ASTEI10209-PA	2	813.434	1625.86	2	2.27	77.63	4.073	0
									LSTIQQLDFGR		ASTEI10209-PA	1	639.347	1277.69	2	3.16	69.8	1.036	0
									DNNILFIPGSALGR		ASTEI10209-PA	4	743.906	1486.81	2	1.68	38.46	2.289	0
									LDLSDNLLSEFPSEALGSVVSLK		ASTEI10209-PA	1	1217.15	2433.3	2	6.76	89.16	8.586	0
									LEGLSELYIR		ASTEI10209-PA	1	596.833	1192.66	2	1.36	19.49	0.42	0
									TTLTAPFPSGIPIISFSQR		ASTEI10209-PA	2	1017.06	2033.12	2	1.17	18.83	5.066	0
ASTEI07729-PA	33.94	6	6	17	218	25.389	7.8	Midgut,Salivary glands,Brain,Proboscis,Antennae,Ovary,Fatbody,Malpighian tubules,Legs
									aLNGFLEFFQREK	N-Term(Acetyl)	ASTEI07729-PA	1	820.925	1640.84	2		63.75	0.143	1
									LPAGENMNDWLAVHVVDFFNR		ASTEI07729-PA	1	815.407	2444.21	3	8.51	48.09	10.702	0
									FTQGTIR		ASTEI07729-PA	2	411.728	822.448	2	1.65	35.43	1.292	0
									aLNGFLEFFQR	N-Term(Acetyl)	ASTEI07729-PA	10	692.367	1383.73	2		62.86	15.341	0
									YEYLWADGETYKKPIQLPAPR		ASTEI07729-PA	1	635.337	2538.32	4	4.06		8.486	1
ASTEI05812-PA	50.6	6	6	19	168	18.706	6.52	Brain,Proboscis,Fatbody,Legs,Maxillary palps,Testis
									NVTKEDVGAVGGVIMR		ASTEI05812-PA	2	822.942	1644.88	2	4.47	77.48	1.903	1
									VALIAAWSIVKK		ASTEI05812-PA	2	433.615	1298.83	3	3.11	44.12	9.361	1
									SLHAHALNVmNFIGTLIDYGLNDPALLK	M10(Oxidation)	ASTEI05812-PA	1	767.409	3066.61	4	6.98	19.43	1.851	0
									EDVGAVGGVIMR		ASTEI05812-PA	4	601.814	1202.62	2	2.6	75.95	0.346	0
									sRPSSLGGSDEEEQTNYHTPDETGLTK	N-Term(Acetyl)	ASTEI05812-PA	1	993.109	2977.31	3		35.3	-5.277	0
									EDVGAVGGVImR	M11(Oxidation)	ASTEI05812-PA	4	609.811	1218.62	2	2.1	21.14	0.407	0
									VALIAAWSIVK		ASTEI05812-PA	5	585.867	1170.73	2	2.2	52.27	2.159	0
ASTEI04092-PA	20.05	6	6	9	374	42.121	7.8	Midgut,Brain,Salivary glands,Male accessory glands
									TRNDWLTIFQQQESR		ASTEI04092-PA	1	641.321	1921.95	3	2.79	25.63	-2.032	1
									VLSTVTEMLNK		ASTEI04092-PA	1	617.84	1234.67	2	1.41	36.38	0.873	0
									NTWVGLEDFYTSLLR		ASTEI04092-PA	1	907.448	1813.89	2	2.35	68.65	-12.897	0
									fLTEFHEVR	N-Term(iTRAQ4plex)	ASTEI04092-PA	1	441.239	1321.7	3	3.74	37.84	-0.571	0
									LDNSEELDSLLLAK		ASTEI04092-PA	3	780.413	1559.82	2	2.77	34.39	0.914	0
									NAHVTETQVMR		ASTEI04092-PA	1	643.317	1285.63	2	1.58		-3.544	0
									FLTEFHEVR		ASTEI04092-PA	1	393.205	1177.6	3	1.56	46.51	-0.657	0
ASTEI07788-PA	14.35	10	10	17	1707	192.84	5.77	Midgut,Brain,Ovary,Legs
									EVPDYYAVIK		ASTEI07788-PA	1	598.814	1196.62	2	1.61	36.88	1.018	0
									AVRPLITPK		ASTEI07788-PA	1	497.824	994.64	2		24.88	-0.65	0
									NcDLYNTDETDVYR	C2(Carbamidomethyl)	ASTEI07788-PA	3	889.368	1777.73	2	4.04	94.04	-2.455	0
									NANPSTTPSRPNSEER		ASTEI07788-PA	1	586.279	1756.82	3	2.14	36.62	0.941	0
									VEEVYEQLLTLGSAELDR		ASTEI07788-PA	4	1032.53	2064.04	2	4.4	56.06	-3.441	0
									AIEQADAHGGEETGAR		ASTEI07788-PA	3	806.37	1611.73	2	4.6	69.53	-2.546	0
									ALLQVAQcIDQK	C8(Carbamidomethyl)	ASTEI07788-PA	1	693.874	1386.74	2	2.83	52.53	-0.272	0
									DLEQYVVR		ASTEI07788-PA	1	511.269	1021.53	2	2.24	44.68	-0.382	0
									FEVEAQR		ASTEI07788-PA	1	439.727	878.446	2	1.27	16.48	10.552	0
ASTEI08620-PA	21.69	5	5	6	438	50.551	8.69	Salivary glands,Ovary
									TPISQVVSGR		ASTEI08620-PA	2	522.296	1043.59	2	3.11	38.26	0.553	0
									NITYVAPIYGADVPGSLTDPDVK		ASTEI08620-PA	1	1203.12	2405.22	2	3.87	62.31	0.346	0
									EcGVATDLLIDGPVK	C2(Carbamidomethyl)	ASTEI08620-PA	1	793.908	1586.81	2	3.71	73.58	-0.249	0
									FQPEVYEQWLR		ASTEI08620-PA	1	747.874	1494.74	2	1.69	31.86	1.44	0
ASTEI06065-PA	29.46	9	9	22	336	36.371	6.74	Midgut,Brain,Male accessory glands,Ovary,Fatbody,Salivary glands,Testis
									EALGDALLLESESVNK		ASTEI06065-PA	4	844.443	1687.88	2	2.79	103.38	1.642	0
									VSQMDEEKVNQEQEVLSK		ASTEI06065-PA	1	1060.51	2120.02	2	6.51	133.06	0.775	1
									SADIERR		ASTEI06065-PA	1	423.727	846.447	2	1.29	38.19	4.767	1
									sVTFEQIILDAK	N-Term(Acetyl)	ASTEI06065-PA	6	703.383	1405.76	2		64.14	1.119	0
									VNQEQEVLSK		ASTEI06065-PA	1	587.309	1173.61	2	2.89	55.86	0.285	0
									QFQDDIDILNK		ASTEI06065-PA	1	674.84	1348.67	2	2.44	33.64	-1.008	0
									AALEDHQHALEHImSK	M14(Oxidation)	ASTEI06065-PA	1	462.228	1845.89	4	1.1		0.38	0
									VNFVEAFTR		ASTEI06065-PA	5	541.78	1082.55	2	1.16		-9.525	0
ASTEI04373-PA	25.19	17	17	34	901	101.433	5.57	Midgut,Salivary glands,Brain,Ovary,Pupae,Fatbody,Malpighian tubules,Maxillary palps,Testis
									NHPDMVDDFFR		ASTEI04373-PA	2	696.804	1392.6	2	1.98	55.4	-0.201	0
									HSQLDPDLDGLASGSFNDFR		ASTEI04373-PA	2	731.015	2191.03	3	4.75	63.84	10.897	0
									LSEELYQGNNYQLTSHFKPYVER		ASTEI04373-PA	1	939.138	2815.4	3	6.47	58.95	11.459	0
									VVEAILNLPENcHIAIR	C12(Carbamidomethyl)	ASTEI04373-PA	3	654.358	1961.06	3	3.62	37.75	-2.63	0
									IADELLR		ASTEI04373-PA	2	415.245	829.482	2	2.16	45.49	5.359	0
									EANISVmR	M7(Oxidation)	ASTEI04373-PA	1	468.234	935.461	2	1.82	28.97	-0.535	0
									SDPAFWLDR		ASTEI04373-PA	3	553.768	1106.53	2	2.36	31.79	1.495	0
									WLEEFQK		ASTEI04373-PA	2	490.247	979.487	2	2.11	32.5	-1.819	0
									GISIIIGR		ASTEI04373-PA	2	414.769	828.531	2	0.95	30.18	0.353	0
									FFcSLLR	C3(Carbamidomethyl)	ASTEI04373-PA	1	471.75	942.493	2	1.51	16.87	6.859	0
									IQNSFHELPETAHESLR		ASTEI04373-PA	1	670.005	2008	3	5.61	52.35	6.487	0
									NILPEESEVVPK		ASTEI04373-PA	2	677.367	1353.73	2	2.46	32.23	0.924	0
									LIAALYK		ASTEI04373-PA	3	396.255	791.503	2	1.26	42.55	0.423	0
									NNEVNPcAFVIVNNWNVLSR	C7(Carbamidomethyl)	ASTEI04373-PA	1	1180.08	2359.16	2	4.07	65.41	-2.42	0
									APLQFLQSPLVTPIIQcGLLAcTLDHR	C17(Carbamidomethyl); C22(Carbamidomethyl)	ASTEI04373-PA	2	1021.22	3061.63	3	6.03	63.89	-0.045	0
									MVALSDGETPHYSVK		ASTEI04373-PA	4	545.269	1633.79	3	1.44	36.93	1.454	0
									LFTVLVESNLTR		ASTEI04373-PA	1	696.405	1391.8	2	2.5	34.8	9.299	0
									mVALSDGETPHYSVK	M1(Oxidation)	ASTEI04373-PA	1	550.599	1649.78	3	3.74	58.28	-1.73	0
ASTEI02149-PA	45.89	19	19	72	523	58.873	5.52	Midgut,Brain,Thorax,Salivary glands,Male accessory glands,Antennae,Fatbody,Ovary,Pupae,Malpighian tubules,Maxillary palps,Testis
									lEHPFEELkk	N-Term(iTRAQ4plex); K9(iTRAQ4plex); K10(iTRAQ4plex)	ASTEI02149-PA	1	426.252	1701.99	4	2.44	10.26	-1.578	1
									ITDEFDKGYHR		ASTEI02149-PA	1	460.889	1380.65	3	2.88	48.36	-0.332	1
									LLQEWVTAHDGR		ASTEI02149-PA	1	475.581	1424.73	3	1.44	61.54	-0.256	0
									nQAAHDAEIVFR	N-Term(iTRAQ4plex)	ASTEI02149-PA	1	505.599	1514.78	3	4.31	26.94	-0.965	0
									AVNSSFGGGKPSAAVR		ASTEI02149-PA	11	752.899	1504.79	2	2.73	71.55	2.135	0
									LEHPFEELKK		ASTEI02149-PA	2	423.9	1269.68	3	1.75	25.91	0.112	1
									ELNKPNDLITDKDVR		ASTEI02149-PA	6	590.651	1769.94	3	1.58	30.82	-0.993	1
									SSHIASVLETPNSLMGHYIVLR		ASTEI02149-PA	4	808.76	2424.26	3	7.17	77.7	-2.14	0
									NQAAHDAEIVFR		ASTEI02149-PA	6	457.567	1370.68	3	1.28	60.86	2.861	0
									EILEDDR		ASTEI02149-PA	1	445.213	889.418	2	1.61	29.77	-9.34	0
									SVGFYGVAR		ASTEI02149-PA	4	478.253	955.498	2	2.11	48.12	-1.545	0
									LWGEHGQTVLENAQIcLIHATALGTEILK	C16(Carbamidomethyl)	ASTEI02149-PA	2	804.678	3215.69	4	6.81	20.96	0.711	0
									iTDEFDk	N-Term(iTRAQ4plex); K7(iTRAQ4plex)	ASTEI02149-PA	1	578.311	1155.61	2	2.56	25.28	0.393	0
									sVGFYGVAR	N-Term(iTRAQ4plex)	ASTEI02149-PA	1	550.305	1099.6	2	2.59	17.96	0.367	0
									ALKDFVDNEGK		ASTEI02149-PA	2	618.317	1235.63	2	3.18	35.71	-0.161	1
									SKMDGEQENFEEAIK		ASTEI02149-PA	1	585.601	1754.79	3	3.96	34.59	-0.693	1
									NQAAHDAEIVFRR		ASTEI02149-PA	1	509.598	1526.78	3	3.21	31.58	-0.999	1
									EAANIAVVR		ASTEI02149-PA	4	471.772	942.536	2	1.56		-0.552	0
									LSNVLWEQNIPLIVAR		ASTEI02149-PA	13	933.038	1865.07	2	4.38	72.87	2.132	0
ASTEI00095-PA	20.14	4	4	45	283	31.152	7.3	Midgut,Proboscis,Antennae,Ovary,Malpighian tubules,Salivary glands,Maxillary palps
									ELAADAPVQSNMEGTSR		ASTEI00095-PA	3	888.418	1775.83	2	3.17	56.94	3.765	0
									WYEQQAGPGRPSLVK		ASTEI00095-PA	1	572.632	1715.88	3	4.06	26.18	-2.35	0
									ELAADAPVQSNmEGTSR	M12(Oxidation)	ASTEI00095-PA	5	896.414	1791.82	2	4.2	58.18	1.937	0
ASTEI09308-PA	22.23	20	20	66	922	104.844	8.1	Midgut,Brain,Salivary glands,Proboscis,Male accessory glands,Antennae,Ovary,Fatbody,Malpighian tubules,Head
									GLILLETYTSLTGDKLK		ASTEI09308-PA	2	933.037	1865.07	2	4.39	89.81	1.874	1
									SEGVTLAR		ASTEI09308-PA	2	416.73	832.452	2	2.22	22.62	-0.113	0
									GFMDASAYISK		ASTEI09308-PA	2	595.282	1189.56	2	1.85	69.2	0.404	0
									VFRVPETATILLSGGIK		ASTEI09308-PA	1	601.025	1801.06	3	4.48	42.38	1.746	1
									FQENLLR		ASTEI09308-PA	3	460.253	919.498	2	1.98	44.99	-1.804	0
									GLILLETYTSLTGDK		ASTEI09308-PA	4	812.449	1623.89	2	1.81	85.21	4.008	0
									AASAWIGHPYFDVIDNSTDFENK		ASTEI09308-PA	2	866.403	2597.2	3	2.08	16.86	0.384	0
									NcLIIcDR	C2(Carbamidomethyl); C6(Carbamidomethyl)	ASTEI09308-PA	1	532.263	1063.52	2	2.09	31.77	15.158	0
									VPETATILLSGGIK		ASTEI09308-PA	11	699.913	1398.82	2	2.12	86.98	-0.852	0
									TKEELLEAGIPR		ASTEI09308-PA	1	452.59	1355.76	3	1.04	44.7	1.203	1
									EVTGQPDYSmFNLSLR	M10(Oxidation)	ASTEI09308-PA	1	936.945	1872.88	2	2.61	68.94	2.135	0
									TmIQIENTYFELGR	M2(Oxidation)	ASTEI09308-PA	1	865.924	1730.84	2	3.68	93.57	-0.577	0
									AASAWIGHPYFDVIDNSTDFENKVNR		ASTEI09308-PA	1	989.474	2966.41	3	8.62	87.6	0.375	1
									WSYIHTIR		ASTEI09308-PA	6	538.288	1075.57	2	1.28	49.45	-0.412	0
									SNNWNPVELR		ASTEI09308-PA	9	614.806	1228.61	2	2.7	52.86	-1.176	0
									TMIQIENTYFELGR		ASTEI09308-PA	2	857.926	1714.85	2	3.51	73.11	-1.056	0
									EVTGQPDYSMFNLSLR		ASTEI09308-PA	4	928.946	1856.88	2	1.24	60.99	0.335	0
									GFmDASAYISK	M3(Oxidation)	ASTEI09308-PA	1	603.279	1205.55	2	2.49	64.47	-0.244	0
									LGIDIGDR		ASTEI09308-PA	3	429.738	858.468	2	2.04	62.93	-0.222	0
									dYLNMLTQQDDAHFTIYk	N-Term(iTRAQ4plex); K18(iTRAQ4plex)	ASTEI09308-PA	1	835.417	2504.24	3	3.18	35.62	-0.611	0
									vPETATILLSGGIk	N-Term(iTRAQ4plex); K14(iTRAQ4plex)	ASTEI09308-PA	1	563.013	1687.03	3	3.11	43.67	0.429	0
ASTEI06804-PA	56.59	25	25	237	463	51.62	5.14	Midgut,Brain,Salivary glands,Proboscis,Male accessory glands,Antennae,Ovary,Pupae,Fatbody,Malpighian tubules,Heamolymph,Legs,Maxillary palps,Testis
									eVAAQIHER	N-Term(iTRAQ4plex)	ASTEI06804-PA	1	598.829	1196.65	2	1.48		-0.005	0
									LMDKVPGILK		ASTEI06804-PA	3	557.338	1113.67	2	2.06	47.11	-0.776	1
									NmTVSDDFDK	M2(Oxidation)	ASTEI06804-PA	1	594.246	1187.48	2	2.27	64.05	-3.995	0
									MQDLTDGAK		ASTEI06804-PA	2	489.732	978.456	2	2.3	48.33	-0.279	0
									LQDLLDGFIRK		ASTEI06804-PA	3	659.388	1317.77	2	3	46.85	11.509	1
									NMTVSDDFDKSEK		ASTEI06804-PA	6	505.893	1515.66	3	1.11	28.9	-0.161	1
									FVLcPEcDNPETDLIVSSK	C4(Carbamidomethyl); C7(Carbamidomethyl)	ASTEI06804-PA	9	1112.02	2223.03	2	2.41	13.11	-0.699	0
									ELVTEASR		ASTEI06804-PA	3	452.739	904.471	2	1.77	48.04	-2.479	0
									TVIVNmAEVAR	M6(Oxidation)	ASTEI06804-PA	2	609.829	1218.65	2	2.39	59.12	-0.79	0
									INIFYELVKR		ASTEI06804-PA	7	432.259	1294.76	3	3.58	40.86	9.124	1
									NPPNVNPASQGASLTEGK		ASTEI06804-PA	17	890.947	1780.89	2	1.14	13.01	2.189	0
									NMTVSDDFDK		ASTEI06804-PA	4	586.25	1171.49	2	1.17	14.63	-0.367	0
									LFYDSDVLDEK		ASTEI06804-PA	10	672.321	1343.63	2	2.65	55.78	-2.05	0
									DANELDNVQVHK		ASTEI06804-PA	22	461.229	1381.67	3	3.17	26.15	0.351	0
									YFGcELGAQTQFDHK	C4(Carbamidomethyl)	ASTEI06804-PA	2	900.902	1800.8	2	0.91	24.8	-2.431	0
									NPPNVNPASQGASLTEGKR		ASTEI06804-PA	11	646.337	1936.99	3	5.84	58.04	5.921	1
									lmDkVPGILk	N-Term(iTRAQ4plex); M2(Oxidation); K4(iTRAQ4plex); K10(iTRAQ4plex)	ASTEI06804-PA	1	781.49	1561.97	2	1.83	12.19	1.428	1
									TVIVNMAEVAR		ASTEI06804-PA	9	601.831	1202.65	2	2.09	60.7	-0.664	0
									LQDLLDGFIR		ASTEI06804-PA	26	595.329	1189.65	2	2.5	53.62	-5.927	0
									YFGcELGAQTQFDHKNER	C4(Carbamidomethyl)	ASTEI06804-PA	4	734	2199.99	3	5.03	54.24	-0.86	1
									EVAAQIHER		ASTEI06804-PA	12	526.778	1052.55	2	2.41	48.9	-0.342	0
									lQDLLDGFIRk	N-Term(iTRAQ4plex); K11(iTRAQ4plex)	ASTEI06804-PA	2	535.992	1605.96	3	2.35	19.76	3.301	1
									iNIFYELVkR	N-Term(iTRAQ4plex); K9(iTRAQ4plex)	ASTEI06804-PA	3	528.324	1582.96	3	3.01	23.13	0.777	1
									FIVNGSHDATK		ASTEI06804-PA	1	594.804	1188.6	2	1.95	25.67	-0.458	0
									AcGFHGPLEVNHK	C2(Carbamidomethyl)	ASTEI06804-PA	4	489.238	1465.7	3	2.78	36.87	-0.181	0
									aTVNVNR	N-Term(Acetyl)	ASTEI06804-PA	3	408.222	815.437	2		37.47	0.115	0
									lFYDSDVLDEk	N-Term(iTRAQ4plex); K11(iTRAQ4plex)	ASTEI06804-PA	2	816.425	1631.84	2	4.1	72.54	0.766	0
									NVTDIFYR		ASTEI06804-PA	10	514.264	1027.52	2	1.74	26.02	-0.428	0
ASTEI07288-PA	44.28	18	18	356	533	57.558	5.24	Midgut,Brain,Salivary glands,Thorax,Proboscis,Male accessory glands,Antennae,Ovary,Pupae,Fatbody,Malpighian tubules,Legs,Head,Maxillary palps,Testis
									tIDTQYQQFSYk	N-Term(iTRAQ4plex); K12(iTRAQ4plex)	ASTEI07288-PA	1	905.469	1809.93	2	4.6	58.59	2.117	0
									STYEVLNSELHDELPALYDSR		ASTEI07288-PA	54	817.728	2451.17	3	5.23	30.52	1.126	0
									HSFQSLQANAAK		ASTEI07288-PA	28	651.334	1301.66	2	4.03	70.94	0.464	0
									lLQNLGk	N-Term(iTRAQ4plex); K7(iTRAQ4plex)	ASTEI07288-PA	1	537.349	1073.69	2	2.72	23.77	-1.309	0
									qLDTYALQFPEmk	N-Term(iTRAQ4plex); M12(Oxidation); K13(iTRAQ4plex)	ASTEI07288-PA	2	629.998	1887.98	3	4.1	22.6	1.726	0
									VYAELEAIVDK		ASTEI07288-PA	14	625.336	1249.66	2	2.11	77.74	-2.225	0
									sTYEVLNSELHDELPALYDSR	N-Term(iTRAQ4plex)	ASTEI07288-PA	2	865.762	2595.27	3	3.57	39.87	1.106	0
									lADQVLk	N-Term(iTRAQ4plex); K7(iTRAQ4plex)	ASTEI07288-PA	1	537.841	1074.67	2	2.79		-0.751	0
									QLDTYALQFPEMK		ASTEI07288-PA	5	792.397	1583.79	2	4.43	62.34	6.347	0
									GREQLEEAK		ASTEI07288-PA	2	530.277	1059.55	2	2.88	40.96	2.692	1
									LVDYDSQR		ASTEI07288-PA	5	498.243	995.479	2	2.39	42.07	-0.537	0
									GMFPANFTRPL		ASTEI07288-PA	12	625.82	1250.63	2	1.89	30.55	-2.386	0
									TIDTQYQQFSYK		ASTEI07288-PA	66	761.376	1521.74	2	2.07		14.968	0
									KLVDYDSQR		ASTEI07288-PA	4	562.292	1123.58	2	3.48	57.78	1.426	1
									GmFPANFTRPL	M2(Oxidation)	ASTEI07288-PA	4	633.818	1266.63	2	2.72	60.71	-1.618	0
									TADEIFDEHLTNFNR		ASTEI07288-PA	59	607.957	1821.86	3	6.37	38.23	8.618	0
									VYAELEAIVDKLATESQR		ASTEI07288-PA	51	679.03	2035.08	3	4.38	52.87	2.195	1
									LQKEFSNYIR		ASTEI07288-PA	2	433.235	1297.69	3	3.01	28.48	0.771	1
									LADQVLK		ASTEI07288-PA	5	393.74	786.473	2	1.95	23.91	1.256	0
									LLQNLGK		ASTEI07288-PA	3	393.251	785.495	2	1.97	27.22	8.653	0
									tADEIFDEHLTNFNR	N-Term(iTRAQ4plex)	ASTEI07288-PA	1	655.986	1965.94	3	6.28	66.08	0.404	0
									ILFLVTNLQTLFAcEQQFHSETSK	C14(Carbamidomethyl)	ASTEI07288-PA	11	952.166	2854.48	3	6.47	35.08	13.534	0
									SLMDAITEVYESQWTGSEVLYGQTK		ASTEI07288-PA	10	945.783	2835.33	3	2.62	35.35	-2.185	0
ASTEI03399-PA	20.74	14	14	40	728	79.539	6.4	Midgut,Brain,Salivary glands,Male accessory glands,Ovary,Fatbody,Testis
									GADIDALcVAPR	C8(Carbamidomethyl)	ASTEI03399-PA	4	629.319	1257.63	2	2.68	49.99	4.548	0
									IYTFGSYR		ASTEI03399-PA	2	503.753	1006.5	2	2.25	42.98	-0.381	0
									QQPEVTEcR	C8(Carbamidomethyl)	ASTEI03399-PA	1	573.763	1146.52	2	2.21	53.18	-1.211	0
									SENLNVDLTESIQNFTDSVHK		ASTEI03399-PA	4	797.386	2390.14	3	2.84	65.66	-1.321	0
									SLEPFNVFEAEEELNHR		ASTEI03399-PA	3	687.331	2059.98	3	2.09	58.69	3.451	0
									YLIQNLER		ASTEI03399-PA	1	524.793	1048.58	2	2.3	55.1	-0.642	0
									EIPDNFDLRDDMLLK		ASTEI03399-PA	1	611.974	1833.91	3	1.98		0.508	1
									AVEEAFVPVIK		ASTEI03399-PA	10	601.344	1201.68	2	2.97	59.84	-1.104	0
									VTDEILR		ASTEI03399-PA	1	423.24	845.473	2	1.84	47.42	0.088	0
									NQHINLAHVNPK		ASTEI03399-PA	2	462.253	1384.74	3	3.77	37.22	-0.883	0
									LVPNIDNFR		ASTEI03399-PA	3	544.298	1087.59	2	1.77	60.79	-0.333	0
									ADYFGSFFDLLK		ASTEI03399-PA	3	711.85	1422.69	2	2.69	62.41	-1.397	0
									LFEAPSFFYR		ASTEI03399-PA	3	638.822	1276.64	2	2.81	68.61	0.115	0
									EIPDNFDLR		ASTEI03399-PA	1	559.776	1118.55	2	2		-2.788	0
									sENLNVDLTESIQNFTDSVHk	N-Term(iTRAQ4plex); K21(iTRAQ4plex)	ASTEI03399-PA	1	893.458	2678.36	3	2.17	22.96	3.621	0
ASTEI01274-PA	45.04	39	39	217	1039	119.053	4.88	Midgut,Brain,Salivary glands,Thorax,Fatbody,Larvae,Ovary,Pupae,Malpighian tubules,Male accessory glands,Legs,Head,Testis
									QWLHDYDcFLGIHDR	C8(Carbamidomethyl)	ASTEI01274-PA	2	658.971	1974.9	3	6.64	48.77	3.106	0
									SILTSTATEESEcSAAK	C13(Carbamidomethyl)	ASTEI01274-PA	21	892.915	1784.82	2	4.19	113.62	0.149	0
									LKNPQVLEQVmR	M11(Oxidation)	ASTEI01274-PA	1	490.941	1470.81	3	1.43		-1.576	1
									yGSPGNIISk	N-Term(iTRAQ4plex); K10(iTRAQ4plex)	ASTEI01274-PA	1	662.378	1323.75	2	3.37	28.6	-2.268	0
									KKFDVFDDFVSPVQSAETLLHNccK	C23(Carbamidomethyl); C24(Carbamidomethyl)	ASTEI01274-PA	1	746.866	2984.44	4	5.92	29.13	4.63	2
									IFYALTQYSLPLEVITK		ASTEI01274-PA	6	1000.06	1999.12	2	3.12	44.83	0.213	0
									YGSPGNIISK		ASTEI01274-PA	6	518.278	1035.55	2	2.15	35.24	2.193	0
									GHIDDFIPSFVELALLR		ASTEI01274-PA	1	648.02	1942.05	3	4.36	74.61	0.816	0
									LAGAIYMK		ASTEI01274-PA	4	433.743	866.479	2	2.12	48.96	-2.214	0
									lQAEEQLNQVHk	N-Term(iTRAQ4plex); K12(iTRAQ4plex)	ASTEI01274-PA	1	575.657	1724.96	3	5.1	46.25	1.525	0
									NLQEVLVLANQK		ASTEI01274-PA	6	684.896	1368.79	2	1.33	15.2	0.619	0
									EITMELLR		ASTEI01274-PA	7	502.775	1004.54	2	1.6	31.88	-1.163	0
									iPIPVPDSSITAHFIR	N-Term(iTRAQ4plex)	ASTEI01274-PA	1	636.367	1907.09	3	2.57	20.7	-1.143	0
									dTIVEAIVHVPSEVIk	N-Term(iTRAQ4plex); K16(iTRAQ4plex)	ASTEI01274-PA	3	679.734	2037.19	3	2.45	30.3	2.586	0
									LcIIGLcTLLSLGDR	C2(Carbamidomethyl); C7(Carbamidomethyl)	ASTEI01274-PA	1	852.462	1703.92	2	3.39	101.15	-0.559	0
									IIPTMLMIFDGLK		ASTEI01274-PA	1	746.417	1491.83	2	2.38	71.9	-3.507	0
									LKNPQVLEQVMR		ASTEI01274-PA	4	485.611	1454.82	3	2.09	47.47	1.561	1
									EAEVGNPIPFAIHEQDR		ASTEI01274-PA	3	641.32	1921.94	3	3.96	33.97	2.657	0
									NPQVLEQVMR		ASTEI01274-PA	1	607.321	1213.63	2	3.24	77.6	-1.141	0
									IIPTMLMIFDGLKR		ASTEI01274-PA	2	549.986	1647.94	3	4.46	43.53	6.086	1
									NLINTSWQDR		ASTEI01274-PA	10	623.812	1246.62	2	2.91	52.41	-0.523	0
									MLEIIYELFQK		ASTEI01274-PA	3	713.886	1426.77	2	2.88	50.05	-0.034	0
									kNLQEVLVLANQk	N-Term(iTRAQ4plex); K1(iTRAQ4plex); K13(iTRAQ4plex)	ASTEI01274-PA	3	483.054	1929.19	4	5.05	25.53	3.507	1
									LAGAIYmK	M7(Oxidation)	ASTEI01274-PA	3	441.741	882.474	2	2.04	70.13	-1.253	0
									NLQEVLVLANQKK		ASTEI01274-PA	1	499.631	1496.88	3	4.77	41.54	-0.544	1
									IPIPVPDSSITAHFIR		ASTEI01274-PA	14	588.333	1762.98	3	4.68	56.37	0.052	0
									ATIDPAQR		ASTEI01274-PA	5	436.235	871.462	2	2.98	59.92	-1.2	0
									EKDGALHMVGSLAEVLLR		ASTEI01274-PA	1	646.692	1938.06	3	6.24	40.9	6.962	1
									ETENEDLTNVLQK		ASTEI01274-PA	8	766.875	1532.74	2	2.8	82.96	-1.02	0
									EQVEQLLMQYVFPEFSSPHGHLR		ASTEI01274-PA	1	693.602	2771.39	4	5.39	23.71	8.502	0
									DGALHmVGSLAEVLLR	M6(Oxidation)	ASTEI01274-PA	5	566.307	1696.91	3	2.87	17.42	0.767	0
									KPTVLSELPDK		ASTEI01274-PA	6	613.852	1226.7	2	3.68	74.74	-2.187	0
									TAVSHAFSWK		ASTEI01274-PA	9	567.289	1133.57	2	1.66		-2.119	0
									dGALHmVGSLAEVLLR	N-Term(iTRAQ4plex); M6(Oxidation)	ASTEI01274-PA	2	614.342	1841.01	3	3.9	33.13	2.258	0
									LLEVIILQcK	C9(Carbamidomethyl)	ASTEI01274-PA	4	614.87	1228.73	2	2.72	37.77	-1.366	0
									LQAEEQLNQVHK		ASTEI01274-PA	24	718.878	1436.75	2	3.36	70.23	-0.394	0
									VMTNTLDYIK		ASTEI01274-PA	10	599.312	1197.62	2	2.19	62.3	-1.101	0
									FLSNALLTDK		ASTEI01274-PA	4	561.314	1121.62	2	2.22	50.85	0.556	0
									AcWVMHYFSDIK	C2(Carbamidomethyl)	ASTEI01274-PA	1	519.575	1556.71	3	4.08	42.23	4.877	0
									DGALHMVGSLAEVLLR		ASTEI01274-PA	4	840.968	1680.93	2	4.71	72.24	10.574	0
									IIRETENEDLTNVLQK		ASTEI01274-PA	2	639.01	1915.01	3	2.41		0.529	1
									DTIVEAIVHVPSEVIK		ASTEI01274-PA	11	874.993	1748.98	2	5.45	60.28	-0.038	0
									IIGFLPTLmQVImQNELEIPVR	M9(Oxidation); M13(Oxidation)	ASTEI01274-PA	2	1293.7	2586.4	2	2.29	60.19	-0.342	0
									VmTNTLDYIK	M2(Oxidation)	ASTEI01274-PA	2	607.309	1213.61	2	2.36	30.1	-1.423	0
									WASHIILR		ASTEI01274-PA	1	498.294	995.58	2	2.09	40.89	1.459	0
ASTEI00472-PA	9.65	5	5	10	518	56.949	8.12	Brain
									ETSPLDINVR		ASTEI00472-PA	1	572.304	1143.6	2	1.79	52.53	-0.401	0
									YPISMTK		ASTEI00472-PA	2	420.22	839.433	2	1.21	23.2	-0.397	0
									TLTLHEVDAEQTPTK		ASTEI00472-PA	4	561.625	1682.86	3	0.75	18.19	0.382	0
									TLTLHEVDAEQTPTKDR		ASTEI00472-PA	2	652.002	1953.99	3	7.31	35.93	2.6	1
									SVYSESYLRPSSQTDR		ASTEI00472-PA	1	625.634	1874.89	3	1.09	16.74	-0.308	0
ASTEI04133-PA	13.73	41	41	81	5623	604.064	5.73	Midgut,Brain,Proboscis,Larvae,Ovary,Fatbody,Malpighian tubules,Salivary glands,Legs,Testis
									ISDINSVR		ASTEI04133-PA	1	452.248	903.489	2	2.5	59.36	-0.781	0
									FDPFSIVDDVATcVLFNPADQK	C13(Carbamidomethyl)	ASTEI04133-PA	1	833.403	2498.2	3	4.07	51.58	1.721	0
									TLVLSDLQPPPIcR	C13(Carbamidomethyl)	ASTEI04133-PA	3	804.943	1608.88	2	2.84	48.97	-0.082	0
									kLTVNIk	N-Term(iTRAQ4plex); K1(iTRAQ4plex); K7(iTRAQ4plex)	ASTEI04133-PA	1	624.424	1247.84	2		19.11	0.075	1
									SMGLcTR	C5(Carbamidomethyl)	ASTEI04133-PA	1	412.691	824.375	2	1.6	39.27	-0.089	0
									HQAVTESVADDAAK		ASTEI04133-PA	2	721.349	1441.69	2	4.96	64.7	-0.685	0
									TASQNELVVKPLFEYINNASNVR		ASTEI04133-PA	2	869.459	2606.36	3	1.58	51.26	2.343	0
									LVVSQDIHSR		ASTEI04133-PA	3	385.216	1153.63	3	1.97	26.03	-0.151	0
									FAQPEIATSVIIR		ASTEI04133-PA	1	722.901	1444.79	2	2.98	50.9	-14.917	0
									STAAEAENGLDQSTGGGGGGLPWHK		ASTEI04133-PA	1	799.705	2397.1	3	5.32	49.81	-2.961	0
									IITTNQLLQLVR		ASTEI04133-PA	7	706.436	1411.87	2	2.96	94.16	1.401	0
									VPcFADTVLQHSPTMNR	C3(Carbamidomethyl)	ASTEI04133-PA	1	658.318	1972.94	3	5.88	42.5	0.648	0
									NNPYAALLR		ASTEI04133-PA	3	516.286	1031.56	2	2.17	21.59	0.699	0
									MGNLIVNDENFEK		ASTEI04133-PA	3	761.864	1522.72	2	1.28		0.193	0
									RNPQHLRPGDDTHLTK		ASTEI04133-PA	2	472	1884.98	4	3.66		-0.394	1
									NEEGLINFAPYSTITSDNLSVQAADVLIQAPLASHR		ASTEI04133-PA	1	1285.66	3854.97	3	5.25	36.86	3.311	0
									ATEFLPLPSPLQIFSSR		ASTEI04133-PA	5	952.021	1903.03	2	3.74	36.96	0.736	0
									NDSVLDITR		ASTEI04133-PA	2	516.769	1032.53	2	2.96	33.77	-0.621	0
									FVSATYcK	C7(Carbamidomethyl)	ASTEI04133-PA	1	488.233	975.46	2	2.69	29.44	-0.833	0
									LPAYSEVLLNDTVR		ASTEI04133-PA	1	795.428	1589.85	2	2.71	75.57	-2.361	0
									SATDSSLLVDLLK		ASTEI04133-PA	2	681.382	1361.76	2	1.41	76.74	3.096	0
									mVASGVVMQLR	M1(Oxidation)	ASTEI04133-PA	1	402.884	1206.64	3		19.6	2.293	0
									QSIPQTFQLSNDSIADLLYQLcTMQNEHTR	C22(Carbamidomethyl)	ASTEI04133-PA	2	592.782	3551.66	6	2.93		-9.56	0
									NPQHLRPGDDTHLTK		ASTEI04133-PA	2	576.964	1728.88	3	3.54	11.54	0.169	0
									FQMYSEAAR		ASTEI04133-PA	2	551.751	1102.49	2		22.62	-3.605	0
									EDGYLNVDAESR		ASTEI04133-PA	2	684.308	1367.61	2	2.59	26.83	1.642	0
									aSSDDQWLKEDGYLNVDAESR	N-Term(Acetyl)	ASTEI04133-PA	3	1220.55	2440.09	2		94	1.454	1
									VFLLLTYLGR		ASTEI04133-PA	1	597.867	1194.73	2	2.28	53.68	1.315	0
									SVEDKYLEIMK		ASTEI04133-PA	2	452.236	1354.69	3	1.73	29.9	0.867	1
									IQEYFDEK		ASTEI04133-PA	2	536.254	1071.5	2	2.09	35.05	1.903	0
									EIGENAIAAPLSK		ASTEI04133-PA	1	656.858	1312.71	2	1.5	47.09	-1.798	0
									AILQLLR		ASTEI04133-PA	1	413.778	826.548	2	1.46	44.95	-3.533	0
									ILIWNGR		ASTEI04133-PA	1	436.263	871.518	2	1.25	26.67	3.558	0
									GGGTSASGGPPIGSSVLTGPSPIDLR		ASTEI04133-PA	3	1169.1	2337.2	2	3.76	133.53	-2.391	0
									HFVENPVLSEEYLQAR		ASTEI04133-PA	1	644.326	1930.96	3	4.64	52.22	-0.868	0
									YDTSSAENAR		ASTEI04133-PA	4	557.244	1113.48	2	2.15	57.22	0.675	0
									sATDSSLLVDLLk	N-Term(iTRAQ4plex); K13(iTRAQ4plex)	ASTEI04133-PA	1	550.66	1649.96	3	2.38	38.6	4.641	0
									VVSFVSNDATNLELQQGGPHTSLLDNK		ASTEI04133-PA	1	961.825	2883.46	3	4.63	66.11	3.679	0
									EANGGTAGGGGGLYNSIANHPSK		ASTEI04133-PA	1	710.348	2129.03	3	2.37		14.035	0
									QLLESSPLTTDDGVLLR		ASTEI04133-PA	1	929.002	1857	2	1.93	114.64	-0.178	0
ASTEI11115-PA	7.18	1	1	2	181	21.011	8.94	Ovary
									STVLAVDNLNGIK		ASTEI11115-PA	2	672.382	1343.76	2	1.62	21.97	2.366	0
ASTEI07827-PA	3.45	2	2	4	870	93.412	5.22	Brain,Ovary
									AAAGSGSSVGSSHTNSPR		ASTEI07827-PA	1	543.924	1629.76	3	6.55	95.89	0.026	0
									VGAHAQAGFDNR		ASTEI07827-PA	3	621.802	1242.6	2	2.65	27.14	0.187	0
ASTEI10245-PA	3.29	2	2	3	547	62.279	6.33	Brain
									LVSLSLER		ASTEI10245-PA	1	458.777	916.546	2	1.14	40.8	-0.133	0
									VLDLENFVFK		ASTEI10245-PA	2	612.337	1223.67	2	1.36	40.98	-0.757	0
ASTEI09033-PA	16.23	6	6	9	419	47.106	7.71	Brain
									YIIDYNENSYR		ASTEI09033-PA	2	725.336	1449.66	2	1.41	34.84	0.067	0
									VYEIPLPSTPSK		ASTEI09033-PA	2	665.86	1330.71	2	2.26	10.14	-9.045	0
									NSLGETEGSIR		ASTEI09033-PA	2	581.791	1162.58	2	2.56	70.02	4.166	0
									GLSMGDFGNYR		ASTEI09033-PA	1	608.775	1216.54	2	2.45	77.01	0.168	0
									REDGQSITVER		ASTEI09033-PA	1	430.553	1289.64	3	4.16	47.22	0.491	1
									VASQPEVLFPMK		ASTEI09033-PA	1	673.362	1345.72	2	2.53	57.26	-1.511	0
ASTEI03052-PA	14.81	2	2	2	135	15.167	9.1	Brain
									QLNSIEQPR		ASTEI03052-PA	1	542.792	1084.58	2	2.64	61.38	1.839	0
									GRPFETGPcSR	C9(Carbamidomethyl)	ASTEI03052-PA	1	421.868	1263.59	3	3.53	24.91	-0.367	0
ASTEI02285-PA	5.48	2	2	2	347	39.843	9.17	Proboscis,Testis
									LESLVQLVLHK		ASTEI02285-PA	1	426.93	1278.77	3	2.45	29.81	-3.128	0
ASTEI10434-PA	83.89	11	11	65	149	16.022	10.26	Midgut,Salivary glands,Thorax,Brain,Proboscis,Antennae,Fatbody,Ovary,Malpighian tubules,Legs,Maxillary palps
									TEVVcDRRPPSVVFQLIPSVQAEAK	C5(Carbamidomethyl)	ASTEI10434-PA	1	942.506	2825.51	3	4.1	15.64	2.439	1
									ITVSFDPFDQNTIATR		ASTEI10434-PA	18	912.961	1824.91	2	2.82	76.43	1.491	0
									rPPSVVFQLIPSVQAEAk	N-Term(iTRAQ4plex); K18(iTRAQ4plex)	ASTEI10434-PA	2	752.11	2254.32	3	4.65	34.93	-0.05	0
									KIELSSANLSTLELLK		ASTEI10434-PA	1	587.012	1759.02	3	2.81	54.02	-0.247	1
									IELSSANLSTLELLK		ASTEI10434-PA	6	815.977	1630.95	2	1.84	50.55	12.689	0
									EFVHHLSAPK		ASTEI10434-PA	8	388.877	1164.62	3	1.93	16.74	1.232	0
									RPPSVVFQLIPSVQAEAK		ASTEI10434-PA	8	656.044	1966.12	3	1.84	16.73	2.998	0
									ISQTNPTcVLK	C8(Carbamidomethyl)	ASTEI10434-PA	11	630.835	1260.66	2	2.53	37.75	1.044	0
									SGGIVSAIGK		ASTEI10434-PA	3	444.761	888.515	2	2.2	43.11	-0.23	0
									EIATSVVK		ASTEI10434-PA	1	423.75	846.493	2		24.62	0.216	0
									HVSALAPK		ASTEI10434-PA	1	411.745	822.483	2	2.59	39.6	0.014	0
									sIKVGGAFRR	N-Term(Acetyl)	ASTEI10434-PA	3	378.224	1132.66	3		35.24	-0.389	2
									iELSSANLSTLELLk	N-Term(iTRAQ4plex); K15(iTRAQ4plex)	ASTEI10434-PA	2	640.383	1919.13	3	4.44	52.87	2.209	0
ASTEI05048-PA	7.1	7	7	11	1014	108.175	6.89	Midgut,Brain
									ETTGNSTSATASPTTAAR		ASTEI05048-PA	2	575.274	1723.81	3	3.92	89.54	-0.295	0
									AYDDIDAVTR		ASTEI05048-PA	1	569.773	1138.54	2	2.44	52.1	0.413	0
									TKETTGNSTSATASPTTAAR		ASTEI05048-PA	2	976.98	1952.95	2	4.59	90.89	0.022	1
									LQHEQIISLTGR		ASTEI05048-PA	2	697.892	1394.78	2		35.35	1.124	0
									LTPAEVLAR		ASTEI05048-PA	1	485.29	969.573	2	1.4	35.21	-0.01	0
									VAELEQELK		ASTEI05048-PA	2	529.791	1058.58	2		33.49	2.125	0
									ELLAQNTQLENR		ASTEI05048-PA	1	714.88	1428.75	2	2.56	90.39	5.637	0
ASTEI05638-PA	10.84	2	2	2	203	23.677	5.21	Ovary
									ADANYVELGALcK	C12(Carbamidomethyl)	ASTEI05638-PA	1	712.348	1423.69	2	3.58	71.44	-0.264	0
									STEIAVNLR		ASTEI05638-PA	1	501.789	1002.57	2	1.34		13.603	0
ASTEI08227-PA	35.91	6	6	33	181	18.953	9.99	Midgut,Brain,Salivary glands,Fatbody
									lLGAHDTQSPPEGIPR	N-Term(iTRAQ4plex)	ASTEI08227-PA	2	916.495	1831.98	2	4.63	73.62	1.846	0
									HSVSSSSGVLMVGPNFR		ASTEI08227-PA	4	880.926	1760.84	2	2.97	17.9	-17.67	0
									NLYNNEHVAIK		ASTEI08227-PA	8	438.897	1314.68	3	2.09		-1.736	0
									aPQLHLEYR	N-Term(iTRAQ4plex)	ASTEI08227-PA	1	424.24	1270.7	3	2.88	17.99	2.18	0
									APQLHLEYR		ASTEI08227-PA	8	376.205	1126.6	3	3.13	34.46	-0.808	0
									LLGAHDTQSPPEGIPR		ASTEI08227-PA	5	563.297	1687.88	3	1.47	19.11	0.629	0
									SKAPQLHLEYR		ASTEI08227-PA	3	447.914	1341.73	3	1.3	22.79	-0.44	1
ASTEI05672-PA	91.3	24	24	488	391	42.872	6.6	Midgut,Brain,Salivary glands,Thorax,Proboscis,Male accessory glands,Antennae,Fatbody,Larvae,Ovary,Pupae,Malpighian tubules,Other,Heamolymph,Legs,Head,Maxillary palps,Testis
									mGIEVDFVDLTNLQLVEQAIKPNTK	M1(Oxidation)	ASTEI05672-PA	2	944.505	2831.5	3	8.23	99.32	5.213	0
									QVLGITDGLVR		ASTEI05672-PA	48	585.845	1170.68	2	3.34	27.53	-0.548	0
									VLHPGLESHPQHELAKR		ASTEI05672-PA	1	487.768	1948.05	4	5.28	17.29	-0.972	1
									ALHVFTLAESLGGYESLAELPSVmTHASVPLAQR	M24(Oxidation)	ASTEI05672-PA	10	1204.29	3610.84	3	1.34		-3.899	0
									TGIVVVVDNTFLSSYLQRPLDLGADVVmYSLTK	M28(Oxidation)	ASTEI05672-PA	1	1210.65	3629.93	3	5.7	38.09	3.095	0
									gGLEESSNFLk	N-Term(iTRAQ4plex); K11(iTRAQ4plex)	ASTEI05672-PA	2	734.898	1468.79	2	5.11	91.14	-0.253	0
									LFWmETPTNPLLK	M4(Oxidation)	ASTEI05672-PA	18	803.419	1605.83	2	2.47	33.75	-2.258	0
									lSVGLEDVDDLIADLk	N-Term(iTRAQ4plex); K16(iTRAQ4plex)	ASTEI05672-PA	1	668.377	2003.12	3	3.89	58.66	0.396	0
									YMNGHSDVIMGAMVTNDEQVYER		ASTEI05672-PA	1	887.056	2659.16	3	1.13	14.75	-1.441	0
									LKFLQNAAGIVPSPFDcYLVNR	C17(Carbamidomethyl)	ASTEI05672-PA	4	841.448	2522.33	3	4.87	61.86	2.883	1
									qVLGITDGLVR	N-Term(iTRAQ4plex)	ASTEI05672-PA	1	657.898	1314.79	2	3.81	70.84	2.566	0
									SNSLTIAK		ASTEI05672-PA	2	417.24	833.472	2	1.53	14.04	-0.411	0
									cIASLDNGR	C1(Carbamidomethyl)	ASTEI05672-PA	2	503.242	1005.48	2	1.39		-0.544	0
									LFWMETPTNPLLK		ASTEI05672-PA	48	795.422	1589.84	2	2.12	39.54	-1.256	0
									QSGPGQHAGFEYGR		ASTEI05672-PA	27	497.561	1490.67	3	3.81	33.4	-5.905	0
									FLETHPK		ASTEI05672-PA	9	436.238	871.468	2	1.64	32.86	0.852	0
									aVSEIAHk	N-Term(iTRAQ4plex); K8(iTRAQ4plex)	ASTEI05672-PA	1	571.842	1142.68	2	2.33	26.27	-1.206	0
									FGLTFSSGLGATTTIITMLQNGDHIVAGDDLYGGTNR		ASTEI05672-PA	3	1271.96	3813.88	3	2.77		1.104	0
									SGNPTRDVLER		ASTEI05672-PA	2	622.322	1243.64	2		11.74	-1.993	1
									RQTYGHSGIMSFYIR		ASTEI05672-PA	3	605.969	1815.89	3	3.06	23.84	-1.335	1
									LSVGLEDVDDLIADLK		ASTEI05672-PA	73	572.306	1714.9	3	2.45	42.21	-5.005	0
									GGLEESSNFLK		ASTEI05672-PA	50	590.797	1180.59	2	3.46	69.51	2.704	0
									QTYGHSGIMSFYIR		ASTEI05672-PA	6	830.406	1659.81	2	4.22	54.65	6.261	0
									MGIEVDFVDLTNLQLVEQAIKPNTK		ASTEI05672-PA	4	939.172	2815.5	3	2.13	12.99	4.109	0
									ALHVFTLAESLGGYESLAELPSVMTHASVPLAQR		ASTEI05672-PA	14	899.467	3594.84	4	2.63	18.87	-4.876	0
									LSVGLEDVDDLIADLKQALEKA		ASTEI05672-PA	3	785.767	2355.28	3	6.92	55.75	8.394	2
									fLETHPk	N-Term(iTRAQ4plex); K7(iTRAQ4plex)	ASTEI05672-PA	1	580.339	1159.67	2	1.88		-0.275	0
ASTEI02073-PA	8.17	5	5	5	551	59.917	8.21	Brain
									DLVcGTDGR	C4(Carbamidomethyl)	ASTEI02073-PA	1	496.727	992.446	2	2.2	36.54	-0.229	0
									IEDcPTEcPK	C4(Carbamidomethyl); C8(Carbamidomethyl)	ASTEI02073-PA	1	624.765	1248.52	2	2.91	63.13	-0.059	0
									TYNNEcELAR	C6(Carbamidomethyl)	ASTEI02073-PA	1	635.28	1269.55	2	2.65	43.78	0.223	0
									LYPNEcHMR	C6(Carbamidomethyl)	ASTEI02073-PA	1	610.268	1219.53	2	2.07	37.45	-5.005	0
ASTEI10423-PA	39.11	58	58	135	2222	247.611	7.06	Midgut,Proboscis,Ovary,Pupae,Fatbody,Malpighian tubules,Head,Testis
									HcAcDIVGSIGQScER	C2(Carbamidomethyl); C4(Carbamidomethyl); C14(Carbamidomethyl)	ASTEI10423-PA	2	924.895	1848.78	2	5.28	83.71	2.294	0
									aDQLIHPEHDVTISDQSR	N-Term(iTRAQ4plex)	ASTEI10423-PA	1	735.707	2205.11	3	4.28	27.68	1.773	0
									vAQLLEAEDTAk	N-Term(iTRAQ4plex); K12(iTRAQ4plex)	ASTEI10423-PA	1	788.444	1575.88	2	4.34	75.47	-1.033	0
									VGSYSYEPNAFK		ASTEI10423-PA	1	681.322	1361.64	2	3.41	53.97	-0.349	0
									SSIVSEQmK	M8(Oxidation)	ASTEI10423-PA	1	512.752	1024.5	2	1.92	47.8	-2.158	0
									FIALELR		ASTEI10423-PA	1	431.264	861.52	2	1.59	41.03	1.019	0
									nQYDATQFDDk	N-Term(iTRAQ4plex); K11(iTRAQ4plex)	ASTEI10423-PA	1	816.891	1632.77	2	3.85	61.34	-0.272	0
									SYAPANFGPTTTNR		ASTEI10423-PA	6	748.86	1496.71	2	3.81	58.57	-0.696	0
									iREEEIGk	N-Term(iTRAQ4plex); K8(iTRAQ4plex)	ASTEI10423-PA	1	421.249	1261.73	3	1.74	10.41	-2.338	1
									APGADHAFLGcVK	C11(Carbamidomethyl)	ASTEI10423-PA	2	448.224	1342.66	3	2.88	31.05	-0.783	0
									aGFFGEGYVEFPSFPLkk	N-Term(iTRAQ4plex); K17(iTRAQ4plex); K18(iTRAQ4plex)	ASTEI10423-PA	2	613.839	2452.33	4	2.89	38.77	2.596	1
									VDGLDNITHGSPTKPIGASMLPVLSDK		ASTEI10423-PA	3	691.366	2762.44	4	2.06		1.466	0
									vPDLEPSQGLGVAVSQLYVDR	N-Term(iTRAQ4plex)	ASTEI10423-PA	2	796.097	2386.28	3	7.27	103.61	1.653	0
									LLGSLWR		ASTEI10423-PA	6	422.757	844.506	2	1.88	23.71	2.124	0
									SILLETQVPK		ASTEI10423-PA	4	564.337	1127.67	2		39.06	0.162	0
									iVmSIALTNPNVQNSPLAYIEGDDRR	N-Term(iTRAQ4plex); M3(Oxidation)	ASTEI10423-PA	1	1016.2	3046.58	3	2.25	31.45	0.82	1
									YGQSIETHSVR		ASTEI10423-PA	2	426.214	1276.63	3	3.09	50.8	-1.088	0
									AGFFGEGYVEFPSFPLK		ASTEI10423-PA	1	946.471	1891.94	2	2.99	66.75	4.818	0
									MLWSLDGSTVTTVTHPQEIEVR		ASTEI10423-PA	2	833.761	2499.27	3	1.39	10.94	5.912	0
									SEEcDPETGVcMNcR	C4(Carbamidomethyl); C11(Carbamidomethyl); C14(Carbamidomethyl)	ASTEI10423-PA	1	922.339	1843.67	2	3.15	87.72	-0.816	0
									vDYGDDAR	N-Term(iTRAQ4plex)	ASTEI10423-PA	1	527.749	1054.49	2	1.88	22.9	-0.897	0
									VSMESSEQcIR	C9(Carbamidomethyl)	ASTEI10423-PA	3	663.295	1325.58	2	2.38	68.37	0.714	0
									SSIVSEQMK		ASTEI10423-PA	1	504.755	1008.5	2	2.34	51.05	-1.183	0
									lLDTNVmADTDVk	N-Term(iTRAQ4plex); M7(Oxidation); K13(iTRAQ4plex)	ASTEI10423-PA	1	869.961	1738.91	2	2.63	57.26	0.438	0
									fIALELR	N-Term(iTRAQ4plex)	ASTEI10423-PA	1	503.316	1005.62	2	2.76	33.22	2.742	0
									TILMTALQNVR		ASTEI10423-PA	1	630.36	1259.71	2	2.6	37.74	-1.586	0
									sYAPANFGPTTTNR	N-Term(iTRAQ4plex)	ASTEI10423-PA	1	820.914	1640.82	2	3.4	56.01	3.524	0
									sILLETQVPk	N-Term(iTRAQ4plex); K10(iTRAQ4plex)	ASTEI10423-PA	1	708.44	1415.87	2	4.56	72.53	0.888	0
									TVQSDLDR		ASTEI10423-PA	2	467.235	933.462	2	1.73	64.84	-1.472	0
									YNTGSWVAVEASR		ASTEI10423-PA	2	720.349	1439.69	2	2.93	95.47	0.192	0
									yPLYFQLPPQFLGDR	N-Term(iTRAQ4plex)	ASTEI10423-PA	1	999.535	1998.06	2	2.79		0.911	0
									LLDTNVMADTDVK		ASTEI10423-PA	6	717.86	1434.71	2	2.93	62.26	-0.784	0
									QFPLVQLHTHENLVLDFYEESIRYGQSIETHSVR		ASTEI10423-PA	1	1022.02	4085.06	4	1.17		2.145	1
									nNNLMDELGk	N-Term(iTRAQ4plex); K10(iTRAQ4plex)	ASTEI10423-PA	1	718.376	1435.74	2	4.67	85.31	0.015	0
									EANDLLADIR		ASTEI10423-PA	2	565.297	1129.59	2	3.25	47.89	1.445	0
									IDDKLQMTR		ASTEI10423-PA	1	373.865	1119.58	3	2.58	25	-0.922	1
									LLDTNVmADTDVK	M7(Oxidation)	ASTEI10423-PA	1	725.857	1450.71	2	3.04	87.43	-1.982	0
									yGQSIETHSVR	N-Term(iTRAQ4plex)	ASTEI10423-PA	1	474.248	1420.73	3	5.21	29.05	0.453	0
									NQYDATQFDDK		ASTEI10423-PA	1	672.788	1344.57	2	2.43	21.82	-1.038	0
									VAQLLEAEDTAK		ASTEI10423-PA	2	644.343	1287.68	2	3	72.17	-0.108	0
									VSmESSEQcIR	M3(Oxidation); C9(Carbamidomethyl)	ASTEI10423-PA	2	671.292	1341.58	2	2.72	64.67	-0.509	0
									LSEETTHIDR		ASTEI10423-PA	4	600.795	1200.58	2	2.86	77.87	-1.774	0
									sVSLTLNQGR	N-Term(iTRAQ4plex)	ASTEI10423-PA	1	609.844	1218.68	2	1.87		-9.512	0
									SLEPEWDTK		ASTEI10423-PA	2	552.766	1104.52	2		15.61	2.624	0
									ScIANTWGNEFQK	C2(Carbamidomethyl)	ASTEI10423-PA	3	777.856	1554.7	2	2.6	40.18	2.352	0
									dQIALAk	N-Term(iTRAQ4plex); K7(iTRAQ4plex)	ASTEI10423-PA	1	523.826	1046.64	2	3.05		-0.606	0
									akDkLNGIEALAR	N-Term(iTRAQ4plex); K2(iTRAQ4plex); K4(iTRAQ4plex)	ASTEI10423-PA	1	611.044	1831.12	3	1.89	12.81	2.752	2
									vPDLEPSQGLGVAVSQLYVDRR	N-Term(iTRAQ4plex)	ASTEI10423-PA	1	848.132	2542.38	3	2.22	10.54	3.046	1
									GYFGHPHLDNGHcEAcDcNR	C13(Carbamidomethyl); C16(Carbamidomethyl); C18(Carbamidomethyl)	ASTEI10423-PA	1	604.742	2415.95	4	3.91		2.712	0
									aNFGFVFR	N-Term(iTRAQ4plex)	ASTEI10423-PA	1	551.302	1101.6	2	3.38	28.85	0.567	0
									kFmVDFAEPLkR	N-Term(iTRAQ4plex); K1(iTRAQ4plex); M3(Oxidation); K11(iTRAQ4plex)	ASTEI10423-PA	2	483.03	1929.1	4	1.74	16.23	-0.829	2
									fmVDFAEPLkR	N-Term(iTRAQ4plex); M2(Oxidation); K10(iTRAQ4plex)	ASTEI10423-PA	1	552.973	1656.9	3	3.19	27.65	0.487	1
									cAGAMLGPQEVASSTNER	C1(Carbamidomethyl)	ASTEI10423-PA	2	939.428	1877.85	2	3.79	93.41	0.361	0
									ANFGFVFR		ASTEI10423-PA	5	479.25	957.493	2	1.82	38.67	-1.183	0
									DQLLLAPK		ASTEI10423-PA	1	449.273	897.54	2	2.01	46.07	-0.803	0
									QEAINLNSDVYK		ASTEI10423-PA	2	697.351	1393.69	2	2.8	49.69	-1.389	0
									FQTTEDISAK		ASTEI10423-PA	1	570.287	1139.57	2	1.18		6.934	0
									qEAINLNSDVYk	N-Term(iTRAQ4plex); K12(iTRAQ4plex)	ASTEI10423-PA	1	841.454	1681.9	2	4.36	64.95	0.359	0
									lNGIEALAR	N-Term(iTRAQ4plex)	ASTEI10423-PA	1	550.831	1100.65	2	3.43	34.33	-0.118	0
									HVQETEVYQTTNQK		ASTEI10423-PA	1	852.913	1704.82	2	5.46	68.02	-0.082	0
									TFNVGTLNVR		ASTEI10423-PA	3	560.811	1120.62	2	2.47	41.31	3.62	0
									KLLDTNVMADTDVK		ASTEI10423-PA	1	781.906	1562.8	2	4.93	86.11	-3.453	1
									nYGVGDHHIkLPLAVk	N-Term(iTRAQ4plex); K10(iTRAQ4plex); K16(iTRAQ4plex)	ASTEI10423-PA	1	439.463	2193.29	5	5.15	25.06	-0.416	1
									dkLNGIEALAR	N-Term(iTRAQ4plex); K2(iTRAQ4plex)	ASTEI10423-PA	2	496.631	1487.88	3	3.93	37.59	-0.967	1
									TGQcQcKPNIEGR	C4(Carbamidomethyl); C6(Carbamidomethyl)	ASTEI10423-PA	2	774.356	1547.71	2	4.09	85.56	0.145	0
									GLScQDPGPGYYR	C4(Carbamidomethyl)	ASTEI10423-PA	2	735.328	1469.65	2	1.69	31.21	1.107	0
									tFNVGTLNVR	N-Term(iTRAQ4plex)	ASTEI10423-PA	1	632.861	1264.71	2	3.58	45.99	0.881	0
									aGFFGEGYVEFPSFPLkkR	N-Term(iTRAQ4plex); K17(iTRAQ4plex); K18(iTRAQ4plex)	ASTEI10423-PA	1	652.865	2608.44	4	5.27	30.41	4.014	2
									YPLYFQLPPQFLGDR		ASTEI10423-PA	1	927.483	1853.96	2	2.43	44.97	0.396	0
									fMVDFAEPLkR	N-Term(iTRAQ4plex); K10(iTRAQ4plex)	ASTEI10423-PA	1	547.64	1640.91	3	3.78	35.37	-0.673	1
									fQTTEDISAk	N-Term(iTRAQ4plex); K10(iTRAQ4plex)	ASTEI10423-PA	1	714.385	1427.76	2	4.06	42.25	0.131	0
ASTEI05760-PA	33.01	6	6	11	206	23.685	6.61	Brain,Proboscis,Ovary,Legs
									RLEVIIFK		ASTEI05760-PA	2	509.329	1017.65	2	3.05	33.98	5.492	1
									LQSFPFVEEKPVHGADEMSK		ASTEI05760-PA	1	759.046	2275.12	3	4.68	63.13	6.849	0
									LYPEAIFR		ASTEI05760-PA	1	504.781	1008.55	2	1.66	26.86	3.98	0
									AYNIPVYISIYSALNNYIAQTLK		ASTEI05760-PA	1	1316.71	2632.42	2	1.6		7.225	0
[truncated: 120,900 more rows]
