# Supplementary material for: Integrating transcriptomic and proteomic data for accurate assembly and annotation of genomes
Source: HighWire-hosted journal article supplement (doi:10.1101/gr.201368.115), 2016-11-15
Supplement: Supplemental_Table_S2.xlsx [file Supplemental_Table_S2.xlsx]

## Sheet: Prasad_etal_SupplTable_S2_Prote
Supplemental Table S2 - Summary of peptides and proteins identified against SDA-500 strain
Prasad et al., 2016. Integrating transcriptomic and proteomic data for accurate assembly and annotation of genomes
Accession	Coverage	# Unique Peptides	#Peptides	#PSMS	# AAs	MW [Kda]	calc. pI	Tissues	Sequence	Modifications	Protein Group Accessions	#PSMs	m/z[Da]	Mass[Da]	Charge	XCorr	IonScore	dMass[ppm]	# Missed Cleavages
ASTE004416-PA	6.33	2	2	3	237	26.924	4.46	Brain
									FTEPAYR		ASTE004416-PA	2	442.219	883.431	2	1.23	40.41	-0.04	0
									LLALTPcK	C7(Carbamidomethyl)	ASTE004416-PA	1	458.27	915.533	2	1.24	27.55	-0.06	0
ASTE000929-PA	22.79	28	28	63	1575	171.198	6.81	Brain,Midgut,Salivary glands
									SGEGGGASELEEDYDGAR		ASTE000929-PA	2	899.871	1798.73	2	4.43	103.95	-0.71	0
									APLVNYDTLSSSTSR		ASTE000929-PA	2	805.904	1610.8	2	2.25	77.22	-1.39	0
									FLWSYNAQSAPK		ASTE000929-PA	2	706.353	1411.7	2	2.67	56.19	-1.67	0
									IMHLLEEHK		ASTE000929-PA	1	575.308	1149.61	2	2.6	38.08	0.87	0
									ILENTPADMcAK	C10(Carbamidomethyl)	ASTE000929-PA	3	681.822	1362.64	2	1.04	43.89	-1.75	0
									NQMSDNVHNAIR		ASTE000929-PA	5	699.831	1398.65	2	2.9	68.69	-0.25	0
									VEIGDIVLK		ASTE000929-PA	2	493.3	985.593	2	1.78	45.98	-0.31	0
									VSSDNTNGSPSQPVSR		ASTE000929-PA	2	816.384	1631.76	2	4.23	138.94	-0.91	0
									FVMTGESQFETR		ASTE000929-PA	2	716.331	1431.65	2	0.58	24.61	-1.43	0
									LLSLDSALNLTHSPNNTQAAGGR		ASTE000929-PA	1	784.076	2350.21	3	0.84	20.34	0.69	0
									ESSPPVSDDGSDVDSLHSFHYSPK		ASTE000929-PA	1	648.04	2589.14	4	4.01	45.32	0.06	0
									HDSQEYAVPER		ASTE000929-PA	2	665.805	1330.6	2	3.99	95.2	0.24	0
									LQHQSPQSSQGPEEYTVELR		ASTE000929-PA	3	771.709	2313.11	3	5.32	55.47	0.91	0
									IPQAVTQSNWSAPQSPSR		ASTE000929-PA	3	977.493	1953.98	2	2.44	83.97	0.4	0
									NQmSDNVHNAIR	M3(Oxidation)	ASTE000929-PA	1	472.221	1414.65	3	1.46		-0.74	0
									aEEVTAVLR	N-Term(Acetyl)	ASTE000929-PA	7	515.284	1029.56	2		62.56	3.43	0
									TYYNLLSSR		ASTE000929-PA	1	558.789	1116.57	2	2.24	47.32	2.51	0
									cDNGAEDGGPVVSK	C1(Carbamidomethyl)	ASTE000929-PA	1	702.807	1404.61	2	4.34	93.36	0.91	0
									INETDAQQYSPR		ASTE000929-PA	4	711.337	1421.67	2		88.61	0.93	0
									cDLPLSHSDR	C1(Carbamidomethyl)	ASTE000929-PA	1	600.276	1199.55	2	2.79	52.02	-1.72	0
									YFADQPR		ASTE000929-PA	1	448.717	896.427	2	2.17	36.24	1.24	0
									EcLSESAcRPSR	C2(Carbamidomethyl); C8(Carbamidomethyl)	ASTE000929-PA	1	484.551	1451.64	3	2.91	17.13	0.54	0
									KPPRPSQIPTARPDMLVTR		ASTE000929-PA	2	540.808	2160.21	4	0.73		0.59	0
									INGEDVTGLATK		ASTE000929-PA	4	609.323	1217.64	2	2.96	44.44	1.79	0
									EVYLQYELK		ASTE000929-PA	1	592.813	1184.62	2	0.76	18.34	-0.2	0
									VEVGDVFLK		ASTE000929-PA	3	503.284	1005.56	2	1.66	53.73	-0.25	0
									ILENTPADmcAK	M9(Oxidation); C10(Carbamidomethyl)	ASTE000929-PA	1	689.82	1378.63	2	2.36	42.73	-1.14	0
									GLALQNYK		ASTE000929-PA	4	453.757	906.506	2	1.91	15.74	1.9	0
ASTE011612-PA	13.91	8	8	17	640	74.002	5.49	Brain,Fatbody,Midgut,Male accessory glands,Salivary glands
									SMQDEVALLQEQQR		ASTE011612-PA	5	837.908	1674.81	2	2.66	39.05	-2.3	0
									ADLEVQWHK		ASTE011612-PA	2	563.289	1125.57	2	0.9	29.48	1.08	0
									SLVVPLEEEIK		ASTE011612-PA	4	628.363	1255.72	2	1.62	46.46	2.97	0
									SmQDEVALLQEQQR	M2(Oxidation)	ASTE011612-PA	1	845.906	1690.8	2	3.69	89.17	-1.65	0
									QLVNETLDESSLMR		ASTE011612-PA	1	817.906	1634.81	2	2.6	73.34	-0.01	0
									LAYEEIETYTTAR		ASTE011612-PA	1	780.38	1559.75	2	3.49	43.45	-3.75	0
									LTEWSTDTEQALDK		ASTE011612-PA	1	818.888	1636.77	2	1.9	57.76	-1.31	0
									LNSLQQDNDFLSGK		ASTE011612-PA	2	789.892	1578.78	2	3.15	55.03	1.1	0
ASTE007876-PA	8.28	10	10	19	1654	174.634	5.21	Fatbody,Midgut,Brain,Ovary,Salivary glands
									FFQEDSYEYVK		ASTE007876-PA	2	727.826	1454.64	2	0.93	34.42	-1.74	0
									NPNFIFK		ASTE007876-PA	1	440.239	879.47	2	2.1	44.72	-2.31	0
									LSGDGGSSSVSSSSGSDAGSK		ASTE007876-PA	3	908.396	1815.78	2	6.45	156.21	0.21	0
									TVAGAASSSSFHSNTDEGAAETEPK		ASTE007876-PA	2	817.703	2451.1	3	3.72	25.05	1.96	0
									KPLPNAATESVK		ASTE007876-PA	1	627.856	1254.7	2	3.74	66.02	0.06	0
									ALSEPADTNDTEDR		ASTE007876-PA	2	767.338	1533.67	2	1.77	92.33	1.21	0
									VEATPIHALTTSGAPSR		ASTE007876-PA	1	569.973	1707.9	3	2.56	60.11	0.86	0
									KVPQMSTVATK		ASTE007876-PA	3	595.335	1189.66	2	2.78	53.46	1.81	1
									VTGGDPDIVNSTDFQPQKK		ASTE007876-PA	2	682.676	2046.01	3	4.06	45.78	-0.11	1
									VTGGDPDIVNSTDFQPQK		ASTE007876-PA	2	959.464	1917.92	2	4.04	50.39	0.4	0
ASTE009293-PA	65.59	24	24	232	279	30.431	6.89	Proboscis,Legs,Brain,Fatbody,Head,Malpighian tubules,Maxillary palps,Thorax,Midgut,Testis,Male accessory glands,Antennaex,Ovary,Pupa,Salivary glands
									WKPDMSEEEGK		ASTE009293-PA	2	668.297	1335.59	2	2.28	49.3	-1.15	0
									TVPVVVANTMLK		ASTE009293-PA	20	636.372	1271.74	2		50.51	-1.2	0
									NMYccGAGTAADTEmTTQMIASNLELHR	C4(Carbamidomethyl); C5(Carbamidomethyl); M15(Oxidation)	ASTE009293-PA	2	1054.78	3162.34	3	3.79	94.57	-1.81	0
									TYEEANK		ASTE009293-PA	1	427.699	854.39	2	1.53	35.32	1.03	0
									LPYATMGSGSLAAmSVFESR	M14(Oxidation)	ASTE009293-PA	1	1046.01	2091	2	3.6	122.26	6.62	0
									TVPVVVANTmLK	M10(Oxidation)	ASTE009293-PA	14	644.373	1287.74	2		70.94	3.62	0
									ATEGPIVADK		ASTE009293-PA	1	500.769	1000.53	2	1.65	75.82	-0.51	0
									DAIAAGVFNDLGSGSNIDLcVIRK	C20(Carbamidomethyl)	ASTE009293-PA	4	835.765	2505.28	3	5.18	55.54	1.28	1
									WKPDMSEEEGKK		ASTE009293-PA	8	366.676	1463.68	4	0.99	42.41	0.18	1
									LPYATmGSGSLAAMSVFESR	M6(Oxidation)	ASTE009293-PA	1	1046.01	2091	2	4.97	132.2	6.39	0
									TYEEANKK		ASTE009293-PA	1	491.745	982.484	2	2.47	42.17	-0.41	1
									ATEGPIVADKNcEK	C12(Carbamidomethyl)	ASTE009293-PA	11	511.252	1531.74	3		32.9	0.46	1
									WKPDmSEEEGKK	M5(Oxidation)	ASTE009293-PA	3	370.675	1479.68	4	1.32	26.86	0.32	1
									NMYccGAGTAADTEMTTQmIASNLELHR	C4(Carbamidomethyl); C5(Carbamidomethyl); M19(Oxidation)	ASTE009293-PA	1	1054.78	3162.34	3	3.39	80.37	-1	0
									NmYccGAGTAADTEMTTQMIASNLELHR	M2(Oxidation); C4(Carbamidomethyl); C5(Carbamidomethyl)	ASTE009293-PA	5	1054.79	3162.37	3	4.71	36.82	7.8	0
									NmYccGAGTAADTEmTTQmIASNLELHR	M2(Oxidation); C4(Carbamidomethyl); C5(Carbamidomethyl); M15(Oxidation); M19(Oxidation)	ASTE009293-PA	1	1065.46	3194.35	3	4.33	17.43	6.4	0
									SFKVDITDTVVR		ASTE009293-PA	30	690.384	1379.76	2		36.88	5.58	1
									LPYATMGSGSLAAMSVFESR		ASTE009293-PA	5	1038	2074.99	2	5.55	129.05	-0.25	0
									LPYATmGSGSLAAmSVFESR	M6(Oxidation); M14(Oxidation)	ASTE009293-PA	1	1054	2106.99	2	3.05	84.14	5.04	0
									WKPDmSEEEGK	M5(Oxidation)	ASTE009293-PA	1	676.295	1351.58	2	2.31	25.77	-0.18	0
									DAIAAGVFNDLGSGSNIDLcVIR	C20(Carbamidomethyl)	ASTE009293-PA	11	1189.09	2377.18	2	4.83	143.89	-0.55	0
									NMYccGAGTAADTEMTTQMIASNLELHR	C4(Carbamidomethyl); C5(Carbamidomethyl)	ASTE009293-PA	6	1049.45	3146.35	3	4.91	121.44	-0.45	0
									SLAYDFKPGTTAILQSK		ASTE009293-PA	71	920.498	1839.99	2	6.11	104.84	2.38	0
									VDITDTVVR		ASTE009293-PA	31	509.283	1017.56	2		59.31	1.07	0
ASTE000542-PA	10	1	1	1	120	13.5	4.27	Legs
									VFDRDGNGYITR		ASTE000542-PA	1	471.569	1412.69	3	3.18	32.56	1	1
ASTE010342-PA	61.8	43	43	579	555	62.285	6.68	Proboscis,Legs,Brain,Larvae,Fatbody,Head,Malpighian tubules,Maxillary palps,Thorax,Midgut,Testis,Haemolymph,Male accessory glands,Antennaex,Ovary,Pupa,Salivary glands
									cGHPTPAADRDNLPcQWEPVDK	C1(Carbamidomethyl); C15(Carbamidomethyl)	ASTE010342-PA	7	641.544	2563.15	4	4.27	31.18	2.86	1
									GLPMPFKPVVEEGAHGPDTVVPVHPFVAmQQPNR	M29(Oxidation)	ASTE010342-PA	2	924.224	3693.87	4	1.78	11.8	1.4	0
									AQLmGLmVQTLSADEK	M4(Oxidation); M7(Oxidation)	ASTE010342-PA	9	883.94	1766.87	2		37.27	3.86	0
									DNLPcQWEPVDK	C5(Carbamidomethyl)	ASTE010342-PA	14	750.843	1500.68	2		22.04	0.04	0
									AIcQSGISTMEWVMQQDSINR	C3(Carbamidomethyl)	ASTE010342-PA	27	818.711	2454.12	3	5.4	86.01	-0.65	0
									GLPmPFKPVVEEGAHGPDTVVPVHPFVAMQQPNR	M4(Oxidation)	ASTE010342-PA	2	924.221	3693.86	4	1.17	33.9	-1.64	0
									AQLMGLMVQTLSADEK		ASTE010342-PA	34	867.944	1734.88	2	1.97	98.14	2.85	0
									LANFDVKPDTEAGR		ASTE010342-PA	106	511.594	1532.77	3		13.61	-2.2	0
									KLDLYENDMAR		ASTE010342-PA	30	456.56	1367.66	3	1.9	40.37	1.79	1
									FPYPVLDcSVER	C8(Carbamidomethyl)	ASTE010342-PA	76	741.359	1481.71	2		34.75	0.67	0
									IPSIPIIFGNNDR		ASTE010342-PA	2	728.394	1455.78	2	2.35	78.35	-10.52	0
									AQLMGLmVQTLSADEK	M7(Oxidation)	ASTE010342-PA	1	875.94	1750.87	2		100.98	0.15	0
									WNEDFLK		ASTE010342-PA	17	476.232	951.457	2		40.47	0.36	0
									MILDPAKDR		ASTE010342-PA	13	353.527	1058.57	3	3.04	43.37	0.19	1
									LGSLGFLHLPSHGIEGNAGLKDQLMVLR		ASTE010342-PA	17	991.548	2972.63	3		39.5	4.8	1
									LGSLGFLHLPSHGIEGNAGLK		ASTE010342-PA	21	706.39	2117.16	3	2.56	61.38	2.02	0
									AIcQSGISTmEWVMQQDSINR	C3(Carbamidomethyl); M10(Oxidation)	ASTE010342-PA	3	824.044	2470.12	3	4.42	57.66	0.12	0
									GLPMPFKPVVEEGAHGPDTVVPVHPFVAMQQPNR		ASTE010342-PA	4	920.224	3677.88	4	1.33	17.18	0.95	0
									RWNEDFLK		ASTE010342-PA	3	554.282	1107.56	2	2.66	32.14	-1.05	1
									AIcQSGISTMEWVmQQDSINR	C3(Carbamidomethyl); M14(Oxidation)	ASTE010342-PA	8	1235.57	2470.13	2	5.41	99.99	4.63	0
									APQPLERFPYPVLDcSVER	C15(Carbamidomethyl)	ASTE010342-PA	1	758.383	2273.13	3	4.24	47.53	-1.99	1
									RGLPMPFKPVVEEGAHGPDTVVPVHPFVAMQQPNR		ASTE010342-PA	1	767.599	3833.97	5	5.65	17.35	-1.84	1
									FRAPQPLERFPYPVLDcSVER	C17(Carbamidomethyl)	ASTE010342-PA	8	644.833	2576.31	4	4.68	44.64	0.49	2
									GLPmPFKPVVEEGAHGPDTVVPVHPFVAmQQPNR	M4(Oxidation); M29(Oxidation)	ASTE010342-PA	2	928.222	3709.87	4		17.01	1.51	0
									mILDPAKDR	M1(Oxidation)	ASTE010342-PA	7	358.859	1074.56	3	2.87	43.04	1.03	1
									LGSLGFLHLPSHGIEGNAGLKDQLmVLR	M25(Oxidation)	ASTE010342-PA	2	747.899	2988.57	4	2.78		-12.06	1
									LLQLTIPGAcHADELSYLFLMR	C10(Carbamidomethyl)	ASTE010342-PA	17	854.447	2561.33	3		55.44	0.29	0
									HINADAK		ASTE010342-PA	3	384.703	768.399	2	2.34		-0.98	0
									LDLYENDMAR		ASTE010342-PA	13	620.288	1239.57	2	1.44	61.85	0.36	0
									DRIDFWR		ASTE010342-PA	1	504.25	1007.49	2	2.54	38.24	-12.85	1
									AQLmGLMVQTLSADEK	M4(Oxidation)	ASTE010342-PA	1	875.941	1750.87	2		108.72	1.62	0
									APQPLER		ASTE010342-PA	5	405.727	810.446	2	1.62	27.23	-0.96	0
									LPNGGTFcAFR	C8(Carbamidomethyl)	ASTE010342-PA	22	620.3	1239.59	2		82.49	-1.02	0
									QGTVcGVKEKLPNGGTFcAFR	C5(Carbamidomethyl); C18(Carbamidomethyl)	ASTE010342-PA	1	582.292	2326.15	4	2.68	32.27	2	2
									TDDQVYQTLMSADK		ASTE010342-PA	37	807.869	1614.73	2		39.7	-0.17	0
									EKLPNGGTFcAFR	C10(Carbamidomethyl)	ASTE010342-PA	7	748.869	1496.73	2	3.32	64.01	-0.93	1
									LLQLTIPGAcHADELSYLFLmR	C10(Carbamidomethyl); M21(Oxidation)	ASTE010342-PA	5	859.785	2577.34	3	2.11	12.36	7.71	0
									LDLYENDmAR	M8(Oxidation)	ASTE010342-PA	10	628.284	1255.56	2		13.89	-1.91	0
									TDDQVYQTLmSADK	M10(Oxidation)	ASTE010342-PA	18	815.868	1630.73	2	2.45	49.27	1.53	0
									QFYcGAK	C4(Carbamidomethyl)	ASTE010342-PA	3	437.201	873.394	2	1.66	25.31	1.75	0
									KLDLYENDmAR	M9(Oxidation)	ASTE010342-PA	13	692.332	1383.66	2		62.46	-0.41	1
									TDDQVYQTLMSADKAQLMGLmVQTLSADEK	M21(Oxidation)	ASTE010342-PA	1	1116.2	3346.6	3	5.23	67.07	3.51	1
									TDDQVYQTLMSADKAQLMGLMVQTLSADEK		ASTE010342-PA	5	1110.88	3330.62	3	2.76	16.64	8.12	1
ASTE010786-PA	5.92	3	3	3	760	81.19	5.25	Haemolymph
									SGDAFPLGLPHQFSFEcTYR	C17(Carbamidomethyl)	ASTE010786-PA	1	777.03	2329.07	3		29.46	1.75	0
									DTDGNLNVPLEPR		ASTE010786-PA	1	720.361	1439.71	2		49.15	1.87	0
									EFRLDQIEASSK		ASTE010786-PA	1	711.866	1422.72	2		68.19	1.67	1
ASTE010100-PA	14.29	4	4	9	245	27.748	5.81	Fatbody,Haemolymph,Salivary glands
									TNYLImEPYPR	M6(Oxidation)	ASTE010100-PA	1	706.848	1412.69	2		51.69	0.18	0
									TNYLIMEPYPR		ASTE010100-PA	2	698.851	1396.69	2	2.46	33.35	1.61	0
									NDPSIDLTAYVR		ASTE010100-PA	1	682.348	1363.69	2	2.01	52.65	2.21	0
									GLTTVQDYDALH		ASTE010100-PA	5	666.826	1332.64	2	1.96	24.49	1.23	0
ASTE004686-PA	82.86	9	9	137	105	12.538	10.42	Proboscis,Legs,Brain,Fatbody,Head,Maxillary palps,Thorax,Midgut,Testis,Male accessory glands,Antennaex,Malpighian tubules,Ovary,Pupa,Salivary glands
									TGQVSYADRRFK		ASTE004686-PA	2	476.584	1427.74	3	2.78	25.79	-1.02	2
									sQQEKVAR	N-Term(Acetyl)	ASTE004686-PA	1	494.264	987.52	2		58.12	-1.47	1
									IGLFTVVIPIIVYAK		ASTE004686-PA	40	823.518	1646.03	2		22.04	0.01	0
									TMTNPHNHLR		ASTE004686-PA	12	407.536	1220.59	3		28.52	-1.9	0
									GESGGVFDTGLAR		ASTE004686-PA	65	633.313	1265.62	2		61.71	4.42	0
									TGQVSYADR		ASTE004686-PA	4	498.741	996.474	2	3.04	67.74	-0.24	0
									TmTNPHNHLR	M2(Oxidation)	ASTE004686-PA	6	412.869	1236.59	3	2.02	44.34	0.78	0
									SFKIGLFTVVIPIIVYAK		ASTE004686-PA	1	1004.62	2008.22	2		72.85	0.14	1
									RAALRNEYWR		ASTE004686-PA	6	445.574	1334.71	3	3.18	29.02	-0.03	2
ASTE010543-PA	93.09	8	93	15908	376	41.75	5.39	Proboscis,Legs,Brain,Larvae,Fatbody,Head,Malpighian tubules,Maxillary palps,Thorax,Midgut,Testis,Haemolymph,Male accessory glands,Antennaex,Ovary,Pupa,Salivary glands
									LcYVALDFEQEmATAAASTSLEK	C2(Carbamidomethyl); M12(Oxidation)	ASTE005788-PA;ASTE010543-PA;ASTE005787-PA	693	855.406	2564.2	3		34.11	5.55	0
									SYELPDGQVITIGNERFR		ASTE006841-PA;ASTE010543-PA;ASTE001343-PA;ASTE005788-PA;ASTE010914-PA;ASTE005787-PA	4	698.693	2094.06	3	3.61	25.84	0.68	1
									HQGVMVGMGQKDSYVGDEAQSKR		ASTE005788-PA;ASTE010543-PA;ASTE001343-PA;ASTE005787-PA;ASTE010914-PA	3	627.55	2507.18	4	5.57	30.97	0.67	2
									mTQIMFETFNSPAmYVAIQAVLSLYASGR	M1(Oxidation); M14(Oxidation)	ASTE005788-PA;ASTE010543-PA;ASTE005787-PA;ASTE010914-PA	2	1091.21	3271.61	3		79.1	9.09	0
									YPIEHGIITNWDDMEKIWHHTFYNELR		ASTE005788-PA;ASTE006841-PA;ASTE010543-PA;ASTE005787-PA	28	692.323	3457.59	5	3.15		-16.51	1
									EKLcYVALDFEQEmATAAASTSLEK	C4(Carbamidomethyl); M14(Oxidation)	ASTE005788-PA;ASTE010543-PA;ASTE005787-PA	28	941.113	2821.33	3	2.59	51.87	-0.54	1
									HQGVMVGmGQKDSYVGDEAQSKR	M8(Oxidation)	ASTE005788-PA;ASTE010543-PA;ASTE001343-PA;ASTE005787-PA;ASTE010914-PA	1	631.548	2523.17	4	5.75		-1.19	2
									LcYVALDFEQEMATAAASTSLEK	C2(Carbamidomethyl)	ASTE005788-PA;ASTE010543-PA;ASTE005787-PA	1223	850.071	2548.2	3	5.11	91.66	1.46	0
									cDVDIRKDLYANTVMSGGTTMYPGIADR	C1(Carbamidomethyl)	ASTE010543-PA	1	1040.49	3119.45	3	5.77	68.28	-2.99	2
									MTQImFETFNSPAMYVAIQAVLSLYASGR	M5(Oxidation)	ASTE005788-PA;ASTE010543-PA;ASTE005787-PA;ASTE010914-PA	1	1085.88	3255.63	3	5.14		13.39	0
									IIAPPERKYSVWIGGSILASLSTFQQMWISK		ASTE010543-PA;ASTE001343-PA;ASTE010914-PA	1	877.482	3506.91	4	6.13	38.86	5.25	2
									IKIIAPPERK		ASTE005788-PA;ASTE005787-PA;ASTE010543-PA;ASTE001343-PA;ASTE010914-PA	57	388.92	1164.75	3		30.09	0.42	2
									TTGIVLDSGDGVSHTVPIYEGYALPHAILR		ASTE005788-PA;ASTE010543-PA;ASTE001343-PA;ASTE005787-PA;ASTE010914-PA	1768	788.666	3151.64	4	4.77	37.93	0.19	0
									KYSVWIGGSILASLSTFQQmWISK	M20(Oxidation)	ASTE010543-PA;ASTE001343-PA;ASTE010914-PA	4	916.147	2746.43	3	5.35	71.45	0.16	1
									LDLAGRDLTDYLmKILTER	M13(Oxidation)	ASTE005788-PA;ASTE010543-PA;ASTE001343-PA;ASTE005787-PA;ASTE010914-PA	1	751.404	2252.2	3	3.93	40.9	1.29	2
									DLTDYLmK	M7(Oxidation)	ASTE005788-PA;ASTE005787-PA;ASTE010543-PA;ASTE001343-PA;ASTE010914-PA	177	507.744	1014.48	2		28.02	-0.8	0
									DSYVGDEAQSKR		ASTE005788-PA;ASTE010543-PA;ASTE001343-PA;ASTE005787-PA;ASTE010914-PA	342	452.213	1354.62	3		39.27	0.33	1
									LDLAGRDLTDYLMK		ASTE005788-PA;ASTE010543-PA;ASTE001343-PA;ASTE005787-PA;ASTE010914-PA	56	541.952	1623.84	3		24.64	0.12	1
									KDLYANTVLSGGTTMYPGIADR		ASTE001343-PA;ASTE005787-PA;ASTE010543-PA	11	781.728	2343.17	3	4.91	50.88	1.3	1
									GILTLKYPIEHGIITNWDDmEK	M20(Oxidation)	ASTE006841-PA;ASTE010543-PA;ASTE005788-PA;ASTE005787-PA	5	868.113	2602.32	3	2.67	16.3	0.95	1
									FRcPEALFQPSFLGmEScGIHETVYNSImK	C3(Carbamidomethyl); M15(Oxidation); C18(Carbamidomethyl); M29(Oxidation)	ASTE010543-PA;ASTE005788-PA	1	1194.22	3580.64	3	4.23	42.17	0.61	1
									EKmTQImFETFNSPAmYVAIQAVLSLYASGR	M3(Oxidation); M7(Oxidation); M16(Oxidation)	ASTE005788-PA;ASTE010543-PA;ASTE005787-PA;ASTE010914-PA	2	1182.27	3544.78	3	6.77	100.83	18.33	1
									EKLcYVALDFEQEMATAAASTSLEK	C4(Carbamidomethyl)	ASTE005788-PA;ASTE010543-PA;ASTE005787-PA	67	935.783	2805.34	3	3.62	73.74	1	1
									EITALAPSSIK		ASTE006841-PA;ASTE010543-PA;ASTE001343-PA;ASTE005787-PA;ASTE010914-PA	4	565.328	1129.65	2		45.22	2.3	0
									YSVWIGGSILASLSTFQQMWISK		ASTE010543-PA;ASTE001343-PA;ASTE010914-PA	1	868.117	2602.34	3		28.23	-0.4	0
									MQKEITALAPSTIK		ASTE010543-PA;ASTE005787-PA;ASTE010914-PA	36	510.958	1530.86	3		46.46	1.74	1
									EKmTQImFETFNSPAMYVAIQAVLSLYASGR	M3(Oxidation); M7(Oxidation)	ASTE005788-PA;ASTE010543-PA;ASTE005787-PA;ASTE010914-PA	1	1176.93	3528.77	3	6.46	54.08	14.66	1
									DIKEKLcYVALDFEQEMATAAASTSLEK	C7(Carbamidomethyl)	ASTE005788-PA;ASTE010543-PA;ASTE005787-PA	1	1054.52	3161.54	3		53.55	0.67	2
									ILTERGYSFTTTAER		ASTE005788-PA;ASTE006841-PA;ASTE010543-PA;ASTE001343-PA;ASTE005787-PA;ASTE010914-PA	2	582.301	1744.89	3	2.53	25	0.53	1
									SYELPDGQVITIGNER		ASTE005788-PA;ASTE005787-PA;ASTE010543-PA;ASTE001343-PA;ASTE010914-PA	2050	597.635	1790.89	3		29.3	-0.74	0
									FRcPEALFQPSFLGMEScGIHETVYNSIMK	C3(Carbamidomethyl); C18(Carbamidomethyl)	ASTE005788-PA;ASTE010543-PA	15	887.919	3548.65	4		20.32	1.65	1
									YPIEHGIITNWDDmEK	M14(Oxidation)	ASTE005788-PA;ASTE005787-PA;ASTE010543-PA	189	659.641	1976.91	3		11.13	0.79	0
									GYSFTTTAER		ASTE005788-PA;ASTE005787-PA;ASTE010543-PA;ASTE001343-PA;ASTE010914-PA	805	566.768	1132.53	2		34.7	2	0
									MTQIMFETFNSPAmYVAIQAVLSLYASGR	M14(Oxidation)	ASTE005788-PA;ASTE010543-PA;ASTE005787-PA;ASTE010914-PA	2	1085.89	3255.64	3	4.81	36.26	17.1	0
									YSVWIGGSILASLSTFQQMWISKEEYDESGPGIVHR		ASTE010543-PA	2	1018.51	4071.02	4	8.19	10.68	6.09	1
									GILTLKYPIEHGIITNWDDMEKIWHHTFYNELR		ASTE006841-PA;ASTE010543-PA;ASTE005788-PA;ASTE005787-PA	2	817.417	4083.06	5	8.16	39.42	-0.25	2
									KDLYANTVLSGGTTmYPGIADR	M15(Oxidation)	ASTE001343-PA;ASTE005787-PA;ASTE006841-PA;ASTE010543-PA;ASTE010914-PA	5	1180.08	2359.16	2	3.01	71.02	-0.92	1
									EEYDESGPGIVHR		ASTE010543-PA	254	496.565	1487.68	3		66.85	2.57	0
									FRcPEALFQPSFLGmEScGIHETVYNSIMK	C3(Carbamidomethyl); M15(Oxidation); C18(Carbamidomethyl)	ASTE005788-PA;ASTE010543-PA	3	891.92	3564.66	4	2.31	12.56	4.44	1
									MTQIMFETFNSPAMYVAIQAVLSLYASGR		ASTE005788-PA;ASTE010543-PA;ASTE005787-PA;ASTE010914-PA	3	1080.54	3239.59	3		41.91	-0.25	0
									DLTDYLMKILTER		ASTE005788-PA;ASTE006841-PA;ASTE010543-PA;ASTE001343-PA;ASTE005787-PA;ASTE010914-PA	10	537.62	1610.85	3		29.97	-0.4	1
									GILTLKYPIEHGIITNWDDmEKIWHHTFYNELR	M20(Oxidation)	ASTE006841-PA;ASTE010543-PA;ASTE005788-PA;ASTE005787-PA	2	820.617	4099.06	5	3.65	14.67	0.86	2
									RGILTLK		ASTE005788-PA;ASTE006841-PA;ASTE010543-PA;ASTE001343-PA;ASTE005787-PA;ASTE010914-PA	48	400.772	800.536	2		26.05	0.96	1
									cPEALFQPSFLGmEScGIHETVYNSImK	C1(Carbamidomethyl); M13(Oxidation); C16(Carbamidomethyl); M27(Oxidation)	ASTE010543-PA	18	1093.16	3277.46	3	5.27	38.06	-0.9	0
									MTQImFETFNSPAmYVAIQAVLSLYASGR	M5(Oxidation); M14(Oxidation)	ASTE005788-PA;ASTE010543-PA;ASTE005787-PA;ASTE010914-PA	1	1091.22	3271.63	3	0.96		15.14	0
									EITALAPSTIK		ASTE010543-PA;ASTE005787-PA;ASTE010914-PA	613	572.333	1143.66	2		26.01	-2.44	0
									mTQIMFETFNSPAMYVAIQAVLSLYASGR	M1(Oxidation)	ASTE005788-PA;ASTE010543-PA;ASTE005787-PA;ASTE010914-PA	4	1085.88	3255.63	3		20.28	13.39	0
									HQGVMVGMGQKDSYVGDEAQSK		ASTE010543-PA;ASTE001343-PA;ASTE005788-PA;ASTE010914-PA;ASTE005787-PA	5	784.365	2351.08	3		95.02	2.22	1
									HQGVMVGmGQKDSYVGDEAQSK	M8(Oxidation)	ASTE010543-PA;ASTE001343-PA;ASTE005787-PA;ASTE010914-PA	1	789.696	2367.07	3		81.53	0.77	1
									FRcPEALFQPSFLGMEScGIHETVYNSImK	C3(Carbamidomethyl); C18(Carbamidomethyl); M29(Oxidation)	ASTE005788-PA;ASTE010543-PA	1	891.923	3564.67	4		13.98	8.35	1
									YPIEHGIITNWDDMEK		ASTE005788-PA;ASTE005787-PA;ASTE010543-PA	209	654.308	1960.91	3		18.16	-0.17	0
									GYSFTTTAEREIVR		ASTE005788-PA;ASTE005787-PA;ASTE010543-PA;ASTE001343-PA;ASTE010914-PA	59	815.416	1629.82	2		45.23	0.45	1
									AGFAGDDAPRAVFPSIVGRPR		ASTE006841-PA;ASTE010543-PA;ASTE001343-PA;ASTE005788-PA;ASTE010914-PA;ASTE005787-PA	18	719.386	2156.14	3	4.61	28.77	3.99	1
									mTQImFETFNSPAMYVAIQAVLSLYASGR	M1(Oxidation); M5(Oxidation)	ASTE005788-PA;ASTE010543-PA;ASTE005787-PA;ASTE010914-PA	3	1091.2	3271.58	3		19.71	0.03	0
									IWHHTFYNELR		ASTE005788-PA;ASTE005787-PA;ASTE010543-PA;ASTE001343-PA;ASTE010914-PA	1036	505.922	1515.75	3		24.73	1.78	0
									VAPEEHPVLLTEAPLNPK		ASTE005788-PA;ASTE005787-PA;ASTE010543-PA;ASTE001343-PA	1913	652.029	1954.07	3	4.77	37.84	4.33	0
									EEYDESGPGIVHRK		ASTE010543-PA	7	539.262	1615.77	3	2.96	39.71	-0.22	1
									cPEALFQPSFLGMEScGIHETVYNSIMK	C1(Carbamidomethyl); C16(Carbamidomethyl)	ASTE005788-PA;ASTE010543-PA	16	1082.5	3245.47	3		20.72	-1.18	0
									HQGVmVGmGQK	M5(Oxidation); M8(Oxidation)	ASTE005788-PA;ASTE010543-PA;ASTE001343-PA;ASTE005787-PA;ASTE010914-PA	140	602.285	1203.56	2	1.21	20.09	1.12	0
									EIVRDIKEK		ASTE005788-PA;ASTE006841-PA;ASTE010543-PA;ASTE001343-PA;ASTE005787-PA;ASTE010914-PA	2	565.333	1129.66	2	3.15	32.5	0.13	2
									IIAPPERK		ASTE005788-PA;ASTE006841-PA;ASTE010543-PA;ASTE001343-PA;ASTE005787-PA;ASTE010914-PA	109	462.288	923.568	2		37.34	0.5	1
									cPEALFQPSFLGmEScGIHETVYNSIMK	C1(Carbamidomethyl); M13(Oxidation); C16(Carbamidomethyl)	ASTE010543-PA	9	1087.83	3261.47	3	4.17	20.24	-0.93	0
									RGILTLKYPIEHGIITNWDDmEK	M21(Oxidation)	ASTE006841-PA;ASTE010543-PA;ASTE005788-PA;ASTE005787-PA	6	690.363	2758.43	4	3.88	20.37	2.69	2
									HQGVmVGmGQKDSYVGDEAQSKR	M5(Oxidation); M8(Oxidation)	ASTE005788-PA;ASTE010543-PA;ASTE001343-PA;ASTE005787-PA;ASTE010914-PA	5	847.062	2539.17	3	2.18	12.37	1.59	2
									VAPEEHPVLLTEAPLNPKANR		ASTE005788-PA;ASTE010543-PA;ASTE001343-PA;ASTE005787-PA	12	574.566	2295.24	4	2.97	24	-0.82	1
									LDLAGRDLTDYLMKILTER		ASTE005788-PA;ASTE010543-PA;ASTE001343-PA;ASTE005787-PA;ASTE010914-PA	2	746.073	2236.2	3	5.12	61.28	1.59	2
									YSVWIGGSILASLSTFQQmWISKEEYDESGPGIVHR	M19(Oxidation)	ASTE010543-PA	4	1022.51	4087	4	4.96	12.45	3.01	1
									cPEALFQPSFLGMEScGIHETVYNSImK	C1(Carbamidomethyl); C16(Carbamidomethyl); M27(Oxidation)	ASTE010543-PA	10	1087.83	3261.47	3	4.51	40.81	0.53	0
									HQGVMVGMGQK		ASTE005788-PA;ASTE010543-PA;ASTE001343-PA;ASTE005787-PA;ASTE010914-PA	224	391.195	1171.57	3		43.76	-0.25	0
									AGFAGDDAPR		ASTE005788-PA;ASTE005787-PA;ASTE010543-PA;ASTE001343-PA;ASTE010914-PA	638	488.728	976.448	2		37.26	-0.25	0
									DSYVGDEAQSK		ASTE005788-PA;ASTE010543-PA;ASTE001343-PA;ASTE005787-PA;ASTE010914-PA	257	599.765	1198.52	2		25.59	-0.22	0
									HQGVmVGMGQK	M5(Oxidation)	ASTE005788-PA;ASTE010543-PA;ASTE001343-PA;ASTE005787-PA;ASTE010914-PA	195	396.527	1187.57	3		41.5	0.59	0
									IIAPPER		ASTE005788-PA;ASTE005787-PA;ASTE010543-PA;ASTE001343-PA;ASTE010914-PA	383	398.24	795.473	2		55.73	0.74	0
									EITALAPSTIKIK		ASTE010543-PA;ASTE005787-PA;ASTE010914-PA	9	692.925	1384.84	2	2.22	14.03	1.01	1
									LDLAGRDLTDYLmK	M13(Oxidation)	ASTE005788-PA;ASTE010543-PA;ASTE001343-PA;ASTE005787-PA;ASTE010914-PA	60	820.423	1639.84	2	2.87	49.03	1.36	1
									RGILTLKYPIEHGIITNWDDMEK		ASTE006841-PA;ASTE010543-PA;ASTE005788-PA;ASTE005787-PA	9	914.817	2742.44	3	3.68	19.56	2.99	2
									DLTDYLMK		ASTE005788-PA;ASTE005787-PA;ASTE010543-PA;ASTE001343-PA;ASTE010914-PA	206	499.747	998.487	2		29.6	0.64	0
									mQKEITALAPSTIKIK	M1(Oxidation)	ASTE010543-PA;ASTE010914-PA;ASTE005787-PA	4	447.764	1788.03	4	3.32	46.08	1.86	2
									EITALAPSTIKIKIIAPPER		ASTE010543-PA;ASTE005787-PA;ASTE010914-PA	2	721.109	2161.31	3	6.04	28.25	7.22	2
									DLYANTVLSGGTTMYPGIADR		ASTE001343-PA;ASTE005787-PA;ASTE006841-PA;ASTE010543-PA;ASTE010914-PA	122	1108.03	2215.06	2		45.83	-5.81	0
									cDVDIRK	C1(Carbamidomethyl)	ASTE006841-PA;ASTE010543-PA;ASTE001343-PA;ASTE005787-PA;ASTE010914-PA	13	453.229	905.452	2	2.14	29.72	0.81	1
									HQGVmVGmGQKDSYVGDEAQSK	M5(Oxidation); M8(Oxidation)	ASTE010543-PA;ASTE001343-PA;ASTE005787-PA;ASTE010914-PA;ASTE006841-PA	6	795.028	2383.07	3	6.02	59.3	1.18	1
									MQKEITALAPSTIKIK		ASTE010543-PA;ASTE010914-PA;ASTE005787-PA	5	591.35	1772.04	3	1.96		0.56	2
									DLYANTVLSGGTTmYPGIADR	M14(Oxidation)	ASTE001343-PA;ASTE005787-PA;ASTE010543-PA	75	1116.04	2231.07	2	3.65	66.78	3.07	0
									VAPEEHPVLLTEAPLNPKANREK		ASTE005788-PA;ASTE010543-PA;ASTE001343-PA;ASTE005787-PA	4	511.283	2552.39	5	6	17.31	1.74	2
									HQGVmVGMGQKDSYVGDEAQSKR	M5(Oxidation)	ASTE005788-PA;ASTE010543-PA;ASTE001343-PA;ASTE005787-PA;ASTE010914-PA	2	631.549	2523.18	4	5.24	63.58	1.52	2
									mQKEITALAPSTIK	M1(Oxidation)	ASTE010543-PA;ASTE005787-PA;ASTE010914-PA	19	773.934	1546.86	2		42.38	5.85	1
									YPIEHGIITNWDDmEKIWHHTFYNELR	M14(Oxidation)	ASTE005788-PA;ASTE006841-PA;ASTE010543-PA;ASTE005787-PA	20	1158.56	3473.66	3	5.25	30.63	7.21	1
									mTQImFETFNSPAmYVAIQAVLSLYASGR	M1(Oxidation); M5(Oxidation); M14(Oxidation)	ASTE005788-PA;ASTE010543-PA;ASTE005787-PA;ASTE010914-PA	6	1096.53	3287.58	3	2.82	62.36	0.94	0
									IKIIAPPER		ASTE005788-PA;ASTE005787-PA;ASTE010543-PA;ASTE001343-PA;ASTE010914-PA	73	518.83	1036.65	2		41.59	0.6	1
									HQGVMVGmGQK	M8(Oxidation)	ASTE005788-PA;ASTE010543-PA;ASTE001343-PA;ASTE005787-PA;ASTE010914-PA	146	396.527	1187.57	3	2.93	43.2	1.51	0
									DLTDYLmKILTER	M7(Oxidation)	ASTE005788-PA;ASTE005787-PA;ASTE010543-PA;ASTE001343-PA;ASTE010914-PA	1	813.922	1626.84	2		97.27	-1.99	1
									AVFPSIVGRPR		ASTE005788-PA;ASTE005787-PA;ASTE010543-PA;ASTE001343-PA;ASTE010914-PA	1315	400.239	1198.7	3		13.51	-2.8	0
ASTE004160-PA	79.17	12	12	114	168	19.65	8.85	Proboscis,Legs,Brain,Fatbody,Head,Maxillary palps,Midgut,Male accessory glands,Antennaex,Ovary,Pupa,Salivary glands,Malpighian tubules
									KPIDGYDISFLITNFHTEQmYK	M20(Oxidation)	ASTE004160-PA	1	892.784	2676.34	3	9.2	62.02	13.01	0
									VLIETSVNSVR		ASTE004160-PA	37	608.85	1216.69	2		46.33	2.7	0
									IcSEEFLK	C2(Carbamidomethyl)	ASTE004160-PA	14	513.251	1025.49	2		43.8	-3.35	0
									RKPIDGYDISFLITNFHTEQmYK	M21(Oxidation)	ASTE004160-PA	1	708.862	2832.43	4	7.07	29.17	9	1
									LVDFVIHFMEEIDKEISEmK	M19(Oxidation)	ASTE004160-PA	3	617.808	2468.21	4	4.54	14.27	0.79	1
									AENFIILR		ASTE004160-PA	21	488.285	975.563	2	1.93	55.11	1	0
									QADEIEK		ASTE004160-PA	1	416.706	832.406	2	2.04	26.87	1.15	0
									HNKPEVEVR		ASTE004160-PA	1	554.299	1107.59	2	1.99	46.02	0.37	0
									HTLTAAmcLSNFSSQVVER	M7(Oxidation); C8(Carbamidomethyl)	ASTE004160-PA	1	723.016	2167.03	3		22.9	2.56	0
									LVDFVIHFmEEIDKEISEmK	M9(Oxidation); M19(Oxidation)	ASTE004160-PA	2	621.814	2484.23	4	4.86	12.83	11.97	1
									aATLKPYLTAVR	N-Term(Acetyl)	ASTE004160-PA	28	673.398	1345.79	2		54.66	3.26	0
									SSKELLLTPVVISR		ASTE004160-PA	4	514.648	1541.93	3	1.29	20.48	1.3	1
ASTE010041-PA	31.77	19	19	76	875	98.859	6.81	Fatbody,Midgut,Brain,Testis,Ovary,Salivary glands,Malpighian tubules
									EVPVAVDHVQGLIVPTKENVPR		ASTE010041-PA	2	599.838	2396.33	4	3.07	34	-0.41	1
									GTPFKPLQQLMGVFPAASR		ASTE010041-PA	1	682.373	2045.11	3	2.85	29.01	2.69	0
									ETQFIFVR		ASTE010041-PA	1	520.283	1039.56	2	2.45	48.42	1.79	0
									VPLLTVEER		ASTE010041-PA	7	528.304	1055.6	2	2.8	49.38	-9.18	0
									TLAAFYADEDVDYER		ASTE010041-PA	1	889.391	1777.78	2	2.73		-8.95	0
									VILSDANVPGEGEHK		ASTE010041-PA	6	522.272	1564.8	3	3.82	49.57	2.55	0
									TVDDQGNVVYEDMSTPNPNR		ASTE010041-PA	1	1126	2250.99	2	5.36	101.19	-0.89	0
									FADGFVFPAR		ASTE010041-PA	11	563.788	1126.57	2	3.13	53.3	-0.24	0
									KAEEPLAVTVAEEEQETPDEVR		ASTE010041-PA	5	1235.1	2469.2	2	6.37	112.02	-1.28	1
									SHVPPAFAELMVDPR		ASTE010041-PA	3	555.952	1665.84	3	2.07	23.69	0.59	0
									GNSDAGGTADAGNNSADQQGPHGVK		ASTE010041-PA	3	775.674	2325.01	3	1.75	30.75	-0.39	0
									GAILPPEKEK		ASTE010041-PA	1	361.214	1081.63	3	1.82	22.49	1.15	1
									HLENVDTHFDR		ASTE010041-PA	1	461.553	1382.64	3	4.67	60.1	-0.57	0
									TQGYLTDSGSVLLER		ASTE010041-PA	4	819.932	1638.86	2	2.4	13.28	13.64	0
									FAWQGVALLPFVDEK		ASTE010041-PA	3	860.46	1719.91	2	2.85	53.74	1.14	0
									SPIIDFYPIDFR		ASTE010041-PA	10	741.885	1482.76	2		66.41	0.21	0
									FAWQGVALLPFVDEKR		ASTE010041-PA	5	626.009	1876.01	3	3.58	21.03	1.05	1
									LFVLPGSAGYK		ASTE010041-PA	9	576.327	1151.65	2	2.12	51.97	1.23	0
									AEEPLAVTVAEEEQETPDEVR		ASTE010041-PA	2	1171.06	2341.11	2	6.06	97.21	0.74	0
ASTE002181-PA	10.48	3	3	4	210	23.301	9.09	Midgut,Brain
									YmQcLAK	M2(Oxidation); C4(Carbamidomethyl)	ASTE002181-PA	1	465.215	929.422	2	2.09	56.78	0.08	0
									YMQcLAK	C4(Carbamidomethyl)	ASTE002181-PA	2	457.217	913.426	2	1.65	37.36	-1.41	0
									IDVcTRPK	C4(Carbamidomethyl)	ASTE002181-PA	1	494.765	988.522	2	2.24	39.76	-2.42	0
ASTE009830-PA	11.09	4	4	4	460	51.333	5.26	Ovary
									TIDDVYIPAEIGVIK		ASTE009830-PA	1	823.457	1645.91	2	2.41	37.21	1.21	0
									TQNATVQFEEK		ASTE009830-PA	1	647.816	1294.62	2	3.73	66.54	-2.12	0
									YSLQSGVQER		ASTE009830-PA	1	583.794	1166.58	2	2.16	25.2	0.16	0
									SLAEVTPYAGEIWPK		ASTE009830-PA	1	830.938	1660.87	2	2.13	16.26	5.9	0
ASTE007236-PA	12.71	13	13	32	1054	119.678	5.36	Larvae,Midgut,Pupa
									LQYAVPLQLLR		ASTE007236-PA	8	657.4	1313.79	2	0.73	24.52	-0.4	0
									EIVVSWAcK	C8(Carbamidomethyl)	ASTE007236-PA	1	546.281	1091.55	2	2.05	37.74	-0.99	0
									VTIQLMATDDR		ASTE007236-PA	1	631.824	1262.64	2	2.79	64.42	-0.63	0
									NPSFQDTTYSGWITER		ASTE007236-PA	1	951.436	1901.87	2	2.36	57.5	-0.89	0
									NLALLNVLMR		ASTE007236-PA	7	578.847	1156.69	2		71.33	0.14	0
									VQWLATTQFSPTDAR		ASTE007236-PA	3	860.937	1720.87	2	2.24	61.54	0.23	0
									TNDGKVQWLATTQFSPTDAR		ASTE007236-PA	2	1118.55	2236.1	2	4.9	83.63	0.89	1
									YIQDNALQAGTPAK		ASTE007236-PA	2	745.386	1489.77	2		88.3	0.07	0
									NAATDTITLNYR		ASTE007236-PA	1	676.844	1352.68	2	2.37	51.46	0.15	0
									NLALLNVLmR	M9(Oxidation)	ASTE007236-PA	1	586.845	1172.68	2	1.53	46.92	0.94	0
									AQVIDDAMNNAR		ASTE007236-PA	3	659.316	1317.62	2	2.84	68.96	2.3	0
									ETDYVPWAAVDR		ASTE007236-PA	1	711.339	1421.67	2	2.26	46.19	1.01	0
									AQVIDDAmNNAR	M8(Oxidation)	ASTE007236-PA	1	667.311	1333.62	2	2.4	36.01	-0.87	0
ASTE006096-PA	6.25	1	1	1	192	22.34	8.14	Ovary
									FQPLGFSTPQQR		ASTE006096-PA	1	703.367	1405.73	2	2.45	62.59	3.48	0
ASTE011683-PA	63.9	91	91	612	1532	168.528	6.7	Proboscis,Legs,Larvae,Fatbody,Malpighian tubules,Maxillary palps,Thorax,Midgut,Brain,Testis,Haemolymph,Antennaex,Ovary,Pupa,Salivary glands
									VAYEELQPIIVTLEDAIKQESFYPGFPR		ASTE011683-PA	19	1084.9	3252.68	3		28.78	-2.44	1
									MGDGFFTGYRK		ASTE011683-PA	2	426.87	1278.6	3		27.6	0.76	1
									IGSAVTLmEMENALR	M8(Oxidation)	ASTE011683-PA	1	825.914	1650.82	2	3.06	55.12	1.46	0
									LPGFADIPGEFNVSLLTGAPNPR		ASTE011683-PA	41	794.753	2382.24	3		31.88	-0.7	0
									QESFYPGFPR		ASTE011683-PA	15	614.292	1227.58	2		35.28	-1.75	0
									NVASVGGNIMTGSPISDLNPIFTAAAIELEVASLDGGVRK		ASTE011683-PA	2	1328.69	3984.07	3		70.02	-1.61	1
									mGGQEHFYLETQAcLAVPK	M1(Oxidation); C14(Carbamidomethyl)	ASTE011683-PA	1	732.347	2195.03	3	1.49		0.4	0
									cTGYRPILEGYK	C1(Carbamidomethyl)	ASTE011683-PA	3	486.248	1456.73	3		22.94	2.72	0
									AYLAIAQSLDK		ASTE011683-PA	8	596.833	1192.66	2		29.72	1.55	0
									KNVIQPQEVLLSLFIPR		ASTE011683-PA	7	665.4	1994.18	3		35.49	2.59	1
									EYGTDcAmGEK	C6(Carbamidomethyl); M8(Oxidation)	ASTE011683-PA	2	638.745	1276.48	2	1.86	50.49	1.25	0
									EGDTTHYNQQIEGcNVGK	C14(Carbamidomethyl)	ASTE011683-PA	26	683.972	2049.9	3	5.13	32.9	4.22	0
									LGcAEGGcGAcTVmVSK	C3(Carbamidomethyl); C8(Carbamidomethyl); C11(Carbamidomethyl); M14(Oxidation)	ASTE011683-PA	1	886.879	1772.75	2		86.04	3.82	0
									DYIELVELNMYR		ASTE011683-PA	9	779.388	1557.77	2		44.13	4.44	0
									AYLAIAQSLDKQQIPNR		ASTE011683-PA	1	643.692	1929.06	3		48.04	2.45	1
									HPFYFHYK		ASTE011683-PA	3	380.187	1138.55	3		25.61	0.69	0
									FKHFDYPVLANPSQIKELTmIER	M20(Oxidation)	ASTE011683-PA	2	698.869	2792.45	4	4.03	27.57	3.1	2
									ELTMIER		ASTE011683-PA	3	446.234	891.46	2	1.91	46.61	-0.12	0
									mIQVAATALGIPFDR	M1(Oxidation)	ASTE011683-PA	6	809.938	1618.87	2		98.35	3.62	0
									GPGmYKLPGFADIPGEFNVSLLTGAPNPR	M4(Oxidation)	ASTE011683-PA	1	1011.18	3031.53	3		72.49	-1.57	1
									RPQVHASAYK		ASTE011683-PA	6	386.214	1156.63	3		38.72	3.24	0
									AGPVFHDEFVFVK		ASTE011683-PA	15	497.927	1491.77	3		53.87	1.48	0
									cNDLLVEELPLSPSAPGGmIVYR	C1(Carbamidomethyl); M19(Oxidation)	ASTE011683-PA	1	1273.64	2546.26	2		21.26	0.45	0
									SLTLSLFFK		ASTE011683-PA	2	528.312	1055.62	2		41.53	2.29	0
									SMFHIQNAYR		ASTE011683-PA	2	633.807	1266.61	2		38.78	1.01	0
									TAAALVGAR		ASTE011683-PA	4	415.249	829.492	2		60.87	2.92	0
									DSDEIEVISSTQHPTEVQHHVAQALGIPASK		ASTE011683-PA	10	831.671	3323.66	4	5.03		3.06	0
									GFGGPQGMMAAESMMR		ASTE011683-PA	2	829.354	1657.7	2	3.89	66.41	2.87	0
									DEDMAVSGTR		ASTE011683-PA	1	540.734	1080.46	2	2.31	41.94	-1.23	0
									QEENLGEDFTLVSPATSAR		ASTE011683-PA	16	1032.5	2063.99	2		84.4	2.95	0
									SGASTFHTLVPK		ASTE011683-PA	13	622.837	1244.67	2		35.7	2.92	0
									LGGGFGGK		ASTE011683-PA	3	346.691	692.374	2	2.11	51.61	2.49	0
									NVASVGGNImTGSPISDLNPIFTAAAIELEVASLDGGVRK	M10(Oxidation)	ASTE011683-PA	1	1334.03	4000.07	3		82.31	-0.03	1
									ISLSATGFYATPDLGYDFATNSGK		ASTE011683-PA	17	1248.6	2496.2	2		24.76	2.61	0
									EYGTDcAMGEK	C6(Carbamidomethyl)	ASTE011683-PA	3	630.747	1260.49	2	2.62	61.25	-0.44	0
									TNKDQHFIAHKQAK		ASTE011683-PA	1	417.226	1665.88	4	1.81		0.05	2
									STQLFEK		ASTE011683-PA	5	426.727	852.447	2	1.27	17.21	0.46	0
									AVGEPPLFLASSVFFAIR		ASTE011683-PA	21	961.033	1921.06	2		52.47	-0.27	0
									AGPVFHDEFVFVKDVVTTQGQIIGAIVADNQTIAQR		ASTE011683-PA	4	1295.35	3884.03	3		42.96	-0.48	1
									MIQVAATALGIPFDR		ASTE011683-PA	12	801.94	1602.87	2		83.56	3.83	0
									QAVEQFNQEHR		ASTE011683-PA	6	462.557	1385.66	3	3.68	55.04	0.35	0
									DATAGWNAWIQQAYFDR		ASTE011683-PA	1	1006.97	2012.93	2		92.95	2.58	0
									QVTGEAIYcDDIPK	C9(Carbamidomethyl)	ASTE011683-PA	12	804.883	1608.76	2		53.41	0.17	0
									LFQAIVDMLHWFAGK		ASTE011683-PA	3	592.647	1775.93	3		48.38	-1.98	0
									NVASVGGNImTGSPISDLNPIFTAAAIELEVASLDGGVR	M10(Oxidation)	ASTE011683-PA	1	1291.33	3871.98	3		89.4	0.79	0
									FKHFDYPVLANPSQIKELTMIER		ASTE011683-PA	1	694.868	2776.45	4	7.39	63.27	-0.12	2
									cWSEVLQSSDFAK	C1(Carbamidomethyl)	ASTE011683-PA	4	778.859	1556.71	2		66.85	3.04	0
									TAWYRPTK		ASTE011683-PA	2	511.775	1022.54	2		40.01	1.11	0
									NVASVGGNIMTGSPISDLNPIFTAAAIELEVASLDGGVR		ASTE011683-PA	1	1286	3856	3		83.17	4.47	0
									LSDLLALKK		ASTE011683-PA	4	500.825	1000.64	2		41.3	2.58	1
									LPGFANIPGELNVSLLTGAPNPR		ASTE011683-PA	1	1174.14	2347.28	2		57.37	2.05	0
									RDDDIAIVNGAFNVR		ASTE011683-PA	1	837.934	1674.86	2	4.8	65.49	2.76	1
									DYIELVELNmYR	M10(Oxidation)	ASTE011683-PA	3	787.385	1573.76	2		26.99	3.51	0
									AAIVAIPVALAAHR		ASTE011683-PA	49	686.927	1372.85	2		60.52	2.61	0
									FFSAEDLTEEQNK		ASTE011683-PA	2	779.357	1557.71	2	3.41	62.98	0.49	0
									FSNELYLAFVYSTK		ASTE011683-PA	1	841.429	1681.85	2		38.31	1.73	0
									ELEIAFQGNLcR	C11(Carbamidomethyl)	ASTE011683-PA	1	725.363	1449.72	2		60.6	1.65	0
									IHISETSTDKVPNTSATAASAGSDLNGTAVLNAcK	C34(Carbamidomethyl)	ASTE011683-PA	4	1167.92	3501.74	3		47.94	6.97	1
									mGDGFFTGYR	M1(Oxidation)	ASTE011683-PA	3	583.752	1166.5	2		47.33	3.35	0
									LSDKLDSESLVFR		ASTE011683-PA	19	754.904	1508.8	2		55.61	3.65	1
									LFQAIVDmLHWFAGK	M8(Oxidation)	ASTE011683-PA	2	896.467	1791.93	2		32.12	0.64	0
									TAcQDKFVER	C3(Carbamidomethyl)	ASTE011683-PA	2	627.3	1253.59	2		51.23	-1.32	1
									MGDGFFTGYR		ASTE011683-PA	4	575.755	1150.5	2		65.3	2.9	0
									IVVGNTEVGVEVK		ASTE011683-PA	23	671.885	1342.76	2		76.89	3.01	0
									VKVAYEELQPIIVTLEDAIK		ASTE011683-PA	2	757.766	2271.28	3		52.85	-0.5	1
									HFDYPVLANPSQIK		ASTE011683-PA	4	814.928	1628.85	2	5.44	82	3.46	0
									LGcAEGGcGAcTVMVSK	C3(Carbamidomethyl); C8(Carbamidomethyl); C11(Carbamidomethyl)	ASTE011683-PA	3	878.882	1756.76	2		99.04	4.29	0
									IHISETSTDK		ASTE011683-PA	1	565.788	1130.57	2		54.53	-0.59	0
									RRDDDIAIVNGAFNVR		ASTE011683-PA	5	610.992	1830.96	3	4.83	62.82	2.52	2
									KTAAALVGAR		ASTE011683-PA	10	479.296	957.585	2		72.81	1.19	1
									EIETGPATETR		ASTE011683-PA	8	602.296	1203.59	2	2.15	57.36	0.02	0
									VPNTSATAASAGSDLNGTAVLNAcK	C24(Carbamidomethyl)	ASTE011683-PA	1	1195.59	2390.16	2	6.16	109.85	0.48	0
									FRPGTDIVEQIHLAFGGMAPTTVLAK		ASTE011683-PA	1	923.83	2769.47	3		49.92	-0.63	0
									RLGGGFGGK		ASTE011683-PA	1	424.74	848.473	2		39.79	-1.47	1
									FKHFDYPVLANPSQIK		ASTE011683-PA	10	635.342	1904.01	3	5.16	35.19	2.73	1
									DVVTTQGQIIGAIVADNQTIAQR		ASTE011683-PA	24	1206.15	2411.29	2	4.94	98.5	1.57	0
									SmFHIQNAYR	M2(Oxidation)	ASTE011683-PA	1	641.8	1282.59	2	2.04	11.93	-4.74	0
									IGSAVTLMEMENALRK		ASTE011683-PA	2	588.313	1762.92	3		49.65	2.9	1
									mGDGFFTGYRK	M1(Oxidation)	ASTE011683-PA	1	647.797	1294.59	2		58.42	-1.32	1
									cNDLLVEELPLSPSAPGGMIVYR	C1(Carbamidomethyl)	ASTE011683-PA	4	1265.64	2530.27	2	4.89	99.33	2.11	0
									IGSAVTLMEMENALR		ASTE011683-PA	9	817.919	1634.83	2		40.27	3.44	0
									WDAQLVER		ASTE011683-PA	13	508.761	1016.51	2	2.95	45.02	-1.18	0
									TNLPSNTAFR		ASTE011683-PA	41	560.792	1120.58	2		48.31	1.45	0
									LHPVQER		ASTE011683-PA	2	439.746	878.484	2	1.4	36.84	-0.15	0
									TRLHPVQER		ASTE011683-PA	3	379.216	1135.63	3	3.4	40.34	0.22	1
									EYPDKDWNFWVSK		ASTE011683-PA	8	857.403	1713.8	2		26.44	4.99	1
									LSDLLALK		ASTE011683-PA	6	436.776	872.546	2		56.25	0.38	0
									TISERLEPIRR		ASTE011683-PA	1	457.268	1369.79	3		14.96	-1.12	2
									IGSAVTLmEmENALR	M8(Oxidation); M10(Oxidation)	ASTE011683-PA	1	833.911	1666.82	2	3.52	33.46	0.54	0
									TNKDQHFIAHK		ASTE011683-PA	4	446.902	1338.69	3		47.44	-0.25	1
									AFNYYTYGAAcSEVEIDcLTGDHQVIR	C11(Carbamidomethyl); C18(Carbamidomethyl)	ASTE011683-PA	4	1051.47	3152.41	3	5.24	54.9	0.46	0
ASTE000672-PA	7.77	4	4	8	811	86.608	5.31	Brain
									VGQQAVVLVATPGKPNNIYK		ASTE000672-PA	1	699.401	2096.19	3	1.77	38.81	1.44	0
									RPHSFETNPSIR		ASTE000672-PA	4	720.872	1440.74	2	3.53	50.59	1.62	0
									ANAIATASSNVDVMK		ASTE000672-PA	1	746.377	1491.75	2		16.96	-0.91	0
									ELPWANVR		ASTE000672-PA	2	492.767	984.527	2	1.14	30.06	0.35	0
ASTE010012-PA	89.95	28	28	658	368	41.178	6.04	Proboscis,Legs,Brain,Fatbody,Head,Malpighian tubules,Maxillary palps,Thorax,Midgut,Testis,Haemolymph,Male accessory glands,Antennaex,Ovary,Salivary glands
									SLLDKYMALPMPDGK		ASTE010012-PA	4	839.935	1678.86	2	4.52	79.13	5.41	1
									VAEEFGIVATLDPKPmQGDWNGAGAHTNVSTQTMR	M16(Oxidation)	ASTE010012-PA	4	936.954	3744.79	4	5.11	18.44	5.25	0
									AcLYAGVK	C2(Carbamidomethyl)	ASTE010012-PA	25	441.233	881.458	2		66.72	3.41	0
									HETSSIHDFNAGVANR		ASTE010012-PA	96	585.613	1754.82	3		35.42	1.76	0
									TcLEVcQQTADEKPWFGIEQEYTLLDVDGRPLGWPK	C2(Carbamidomethyl); C6(Carbamidomethyl)	ASTE010012-PA	10	1070.5	4278.97	4	4.43		-17.83	0
									VAEEFGIVATLDPKPMQGDWNGAGAHTNVSTQTmREPGGLAEIER	M34(Oxidation)	ASTE010012-PA	2	1199.83	4796.31	4	4.07		0.06	1
									RGNNILVLcETYHYDGTPTESNKR	C9(Carbamidomethyl)	ASTE010012-PA	3	710.1	2837.38	4	3.16	11	5.36	2
									AYDPHGGK		ASTE010012-PA	1	422.701	844.394	2	2.17	44.67	-0.87	0
									NGFPGPQGPYYcGVGADK	C12(Carbamidomethyl)	ASTE010012-PA	32	942.425	1883.84	2	4.05	58.28	2.78	0
									SLLDKYmALPMPDGK	M7(Oxidation)	ASTE010012-PA	3	565.623	1694.85	3	3.26	40.46	2.59	1
									IcGTNAEVMPAQWEYQVGPcEGIQIGDDLWMSR	C2(Carbamidomethyl); C20(Carbamidomethyl)	ASTE010012-PA	1	1270.9	3810.7	3	0.53		-1.47	0
									VAEEFGIVATLDPKPMQGDWNGAGAHTNVSTQTmR	M34(Oxidation)	ASTE010012-PA	2	936.947	3744.76	4	4.3	16.51	-2.77	0
									NGFPGPQGPYYcGVGADKVYAR	C12(Carbamidomethyl)	ASTE010012-PA	14	791.695	2373.07	3	4.24	37.06	-15.81	1
									VAEEFGIVATLDPKPMQGDWNGAGAHTNVSTQTMREPGGLAEIER		ASTE010012-PA	2	1195.83	4780.3	4	3.35	20.11	-2.03	1
									LTGKHETSSIHDFNAGVANR		ASTE010012-PA	52	718.695	2154.07	3		58.66	1.23	1
									EPGGLAEIER		ASTE010012-PA	70	535.786	1070.56	2		70.34	14.98	0
									SLLDKYMALPmPDGK	M11(Oxidation)	ASTE010012-PA	1	847.927	1694.85	2	3.36	37.08	-1.8	1
									GNNILVLcETYHYDGTPTESNKR	C8(Carbamidomethyl)	ASTE010012-PA	27	894.412	2681.22	3	4.54	33.99	-15.32	1
									GNNILVLcETYHYDGTPTESNK	C8(Carbamidomethyl)	ASTE010012-PA	29	842.393	2525.16	3		33.04	1.08	0
									GVSDQGFGYFEDR		ASTE010012-PA	124	738.824	1476.64	2		95.27	1.09	0
									VAEEFGIVATLDPKPmQGDWNGAGAHTNVSTQTMREPGGLAEIER	M16(Oxidation)	ASTE010012-PA	1	1199.83	4796.31	4		26.77	0.06	1
									TLELSPNAHINK		ASTE010012-PA	97	668.868	1336.73	2		49.81	4.73	0
									VAEEFGIVATLDPKPMQGDWNGAGAHTNVSTQTMR		ASTE010012-PA	6	932.954	3728.8	4	4.77		4.17	0
									AYDPHGGKDNER		ASTE010012-PA	5	679.808	1358.61	2	2.18	54.25	0.11	1
									SLLDKYmALPmPDGK	M7(Oxidation); M11(Oxidation)	ASTE010012-PA	13	570.943	1710.82	3	2.9	31.79	-16.65	1
									RGNNILVLcETYHYDGTPTESNK	C9(Carbamidomethyl)	ASTE010012-PA	2	894.43	2681.27	3	3.9	20.11	4.28	1
									DIVDAHYR		ASTE010012-PA	23	494.746	988.484	2	2.3	39.8	-0.28	0
									RLTGKHETSSIHDFNAGVANR		ASTE010012-PA	9	578.297	2310.17	4	4.26	37.71	-0.97	2
ASTE009305-PA	12.28	7	7	10	635	72.309	8.09	Midgut,Ovary,Salivary glands
									LAEIFLDQR		ASTE009305-PA	1	552.806	1104.6	2	2.56	70.09	-0.49	0
									VFcGDTFASHVLQR	C3(Carbamidomethyl)	ASTE009305-PA	2	818.901	1636.79	2	3.47	92.13	2.23	0
									VLSIALLR		ASTE009305-PA	1	442.801	884.594	2	2.05	56.16	1.67	0
									ENIVHELAEEcLAQLNNK	C11(Carbamidomethyl)	ASTE009305-PA	2	708.686	2124.04	3	2.94	56.24	2.02	0
									HLIVPEEWQK		ASTE009305-PA	1	639.847	1278.69	2	3.32	47.55	1.32	0
									AVAPLQIK		ASTE009305-PA	1	420.271	839.536	2	2.1	34.27	0.73	0
									YLSAILDNITR		ASTE009305-PA	2	639.857	1278.71	2	1.04	50.67	1.6	0
ASTE000756-PA	7.43	3	3	10	834	93.69	4.92	Midgut,Brain,Antennaex,Salivary glands
									ATATETDKQEDQPPGDSDR		ASTE000756-PA	3	687.638	2060.9	3	1.85	42.51	-0.02	1
									TLEDSAKEEDKPAPNSK		ASTE000756-PA	6	620.306	1858.9	3	1.35	64.82	0.3	1
									SLGAVVTQNLEPTTTHLVAVTIGTSK		ASTE000756-PA	1	879.819	2637.44	3	1.68	13.36	-0.85	0
ASTE001074-PA	10.96	1	1	1	219	22.3	6.09	Brain
									SSAAGAQGAAPSTSSPTTSATGGK		ASTE001074-PA	1	1025.49	2049.97	2	5.65	50.64	1.13	0
ASTE006573-PA	1.38	2	2	3	1591	164.462	6.14	Brain
									IKTDPEQQQQQQRPTSGTGK		ASTE006573-PA	2	564.54	2255.14	4	3.36	27.81	0.56	1
									TDPEQQQQQQRPTSGTGK		ASTE006573-PA	1	671.992	2013.96	3	1.91	23.5	0.74	0
ASTE009266-PA	63.35	76	76	583	1397	161.267	6.58	Proboscis,Legs,Brain,Fatbody,Head,Maxillary palps,Thorax,Midgut,Testis,Haemolymph,Male accessory glands,Antennaex,Ovary,Pupa,Salivary glands,Malpighian tubules
									EAENWLTK		ASTE009266-PA	1	495.748	990.489	2	1.84	34.07	0.18	0
									ADPGGTVVSEVTR		ASTE009266-PA	1	644.331	1287.65	2	1.6	56.02	0.27	0
									EMHFATILDRGEALLVQSHPASK		ASTE009266-PA	2	638.337	2550.33	4	5.24	16.24	4.86	1
									QGNISLDKNEScTLLDTSGR	C12(Carbamidomethyl)	ASTE009266-PA	1	736.69	2208.06	3	1.67		0.24	1
									DGLAFSALIHR		ASTE009266-PA	32	600.329	1199.65	2		39.82	-1.99	0
									HLEQPLQEMNDDcHNLK	C13(Carbamidomethyl)	ASTE009266-PA	1	707.653	2120.95	3	2.29	55.69	-1.81	0
									EELNAFGETIAQLQHQATAIVPLK		ASTE009266-PA	9	874.468	2621.39	3	1.72	19.96	-1.72	0
									QIGTNPYFR		ASTE009266-PA	1	548.283	1095.56	2	1.26	44.37	0.29	0
									VNDFTSSWR		ASTE009266-PA	8	556.261	1111.52	2		37.59	-1.84	0
									YYENLMSELEK		ASTE009266-PA	2	709.83	1418.65	2	1.32	77.03	1.69	0
									LmSALADRDmILQQEVQR	M2(Oxidation); M10(Oxidation)	ASTE009266-PA	1	717.028	2149.07	3		22.64	-1.73	1
									FETLVEQLTQR		ASTE009266-PA	1	682.365	1363.72	2		25.67	0.59	0
									WNNIcGQLAER	C5(Carbamidomethyl)	ASTE009266-PA	1	680.829	1360.65	2	3.21	17.16	5.5	0
									VYAELLSTSTK		ASTE009266-PA	7	606.331	1211.65	2	2.01	54.78	1.67	0
									LSTEVLGSTLETTK		ASTE009266-PA	3	739.9	1478.79	2	2	55.27	-1.02	0
									NEScTLLDTSGR	C4(Carbamidomethyl)	ASTE009266-PA	1	676.81	1352.61	2	3.78	42.33	1.81	0
									DMILQQEVQR		ASTE009266-PA	3	630.323	1259.64	2	1.39	66.6	-2.54	0
									LTAIQETISSQQPEmDKmNDSADQLGR	M15(Oxidation); M18(Oxidation)	ASTE009266-PA	3	1013.48	3038.41	3	8.11	39	3.21	1
									HATDYHSFFDEVR		ASTE009266-PA	2	812.363	1623.72	2	2.82	63.53	-0.16	0
									SLDNLMDLWK		ASTE009266-PA	15	617.81	1234.61	2	2.2	67.59	-0.3	0
									ELNTQAGLHGDR		ASTE009266-PA	20	655.825	1310.64	2		66.03	-1.85	0
									IFTEQcISLK	C6(Carbamidomethyl)	ASTE009266-PA	14	619.828	1238.65	2		38.58	2.23	0
									QLELPSTQEGLYEVYKR		ASTE009266-PA	1	685.025	2053.06	3	5.04	90.46	-0.51	1
									LSGLSYPVQETTITK		ASTE009266-PA	40	818.948	1636.89	2	2.19	10.07	5.32	0
									YSQSEFTLDQGESLLR		ASTE009266-PA	49	936.956	1872.9	2		74.94	3.94	0
									TRLEEMAR		ASTE009266-PA	1	503.261	1005.51	2	2.37	32.42	-0.74	1
									GWDFEQFLAmGAEQR	M10(Oxidation)	ASTE009266-PA	1	900.912	1800.82	2	4.31	100.63	8.6	0
									ENNPAGSSYAVVSR		ASTE009266-PA	1	725.849	1450.69	2		83.66	-1.07	0
									LTAIQETISSQQPEMDK		ASTE009266-PA	4	959.973	1918.94	2	1.05	35.63	-1.61	0
									YYENLMSELEKR		ASTE009266-PA	1	525.588	1574.75	3	2.96	21.06	-1.11	1
									ALNDDADKLLAEGDPADPQLR		ASTE009266-PA	17	746.372	2237.1	3	4.4	66.72	-1.71	1
									LTAIQETISSQQPEMDKMNDSADQLGR		ASTE009266-PA	5	1002.81	3006.41	3	6.23	56.08	0.09	1
									LmSALADRDMILQQEVQR	M2(Oxidation)	ASTE009266-PA	1	711.699	2133.08	3	6.51	14.35	1.31	1
									LLEGALAGLEDNEQVISDLESK		ASTE009266-PA	62	1172.1	2343.2	2	3.05	83.71	3.43	0
									YFESIGEVDVETELRPEALEK		ASTE009266-PA	4	818.412	2453.22	3	6.03	46.85	5.25	0
									LLAEGDPADPQLR		ASTE009266-PA	7	697.868	1394.73	2	2.18	50.58	0.5	0
									DLDSLEHTVQILEDYK		ASTE009266-PA	7	639.99	1917.95	3	3.09	54.9	5.62	0
									VIEATVTELPDVIDDINRDHWR		ASTE009266-PA	5	652.34	2606.34	4	5.96	23.27	6.62	1
									ISDIVVGQEDNLTAR		ASTE009266-PA	1	815.424	1629.84	2	1.87	22.26	-1.74	0
									VYAELLSTSTKR		ASTE009266-PA	5	456.591	1367.76	3	3.51	36.46	4.69	1
									EMHFATILDR		ASTE009266-PA	5	411.541	1232.61	3	1.55	24.63	-1.46	0
									NIVEGLDGDIR		ASTE009266-PA	25	600.812	1200.62	2		59.42	-3.63	0
									DWADKNLDLSAVHR		ASTE009266-PA	3	547.28	1639.83	3	1.79	25.26	4.46	1
									VIEATVTELPDVIDDINR		ASTE009266-PA	6	1006.54	2012.07	2	6.01	80.6	5.89	0
									GWDFEQFLAMGAEQR		ASTE009266-PA	2	892.915	1784.82	2	4.66	88.07	9.79	0
									NRPDLIDWR		ASTE009266-PA	4	395.544	1184.62	3	1.2	25.04	0.66	0
									LMSALADRDMILQQEVQR		ASTE009266-PA	7	706.366	2117.08	3	1.22	27.35	-0.71	1
									LMSALADR		ASTE009266-PA	1	438.734	876.461	2	1.31	56.67	0.33	0
									LFDEFEKR		ASTE009266-PA	6	361.856	1083.55	3		32.45	5.75	1
									DKQHLFSIYK		ASTE009266-PA	3	426.9	1278.69	3	4.32	22.24	1.66	1
									QLELPSTQEGLYEVYK		ASTE009266-PA	2	948.984	1896.96	2	2	71.65	1.05	0
									QcTVQSIcSYK	C2(Carbamidomethyl); C8(Carbamidomethyl)	ASTE009266-PA	3	687.312	1373.62	2	3.05	59.89	-1.6	0
									EYKHTETIITK		ASTE009266-PA	1	681.869	1362.73	2	2.27	20.05	3.47	1
									DVQEYTEWcQSK	C9(Carbamidomethyl)	ASTE009266-PA	3	786.835	1572.66	2	3.3	44.39	0.05	0
									HTETIITK		ASTE009266-PA	1	471.767	942.526	2	2.41	24.38	0.45	0
									SVETAIGLMK		ASTE009266-PA	6	524.789	1048.57	2	2.41	36.59	-0.86	0
									VEQVNLTGGR		ASTE009266-PA	1	536.792	1072.58	2	2.28	69.59	1.74	0
									ELDHIILSPMPR		ASTE009266-PA	4	710.884	1420.76	2	2.52	33.66	-0.35	0
									SMITYLSSLYDVFPEPPQMHPLFDMDSQR		ASTE009266-PA	2	1148.88	3444.62	3	6.34	13.92	8.19	0
									ELDSMLGETVER		ASTE009266-PA	3	689.83	1378.65	2	1.94	59.96	0.85	0
									QLHTSDYGSDLPSAK		ASTE009266-PA	3	809.889	1618.77	2	4.43	70.3	-0.22	0
									LRQNMIFATIK		ASTE009266-PA	1	667.89	1334.77	2	3.92	34.55	9.08	1
									LLDPEDVDTNEPDEK		ASTE009266-PA	41	864.897	1728.79	2	2.58	46.69	3.56	0
									ALNDDADKLLAEGDPADPQLRR		ASTE009266-PA	2	798.404	2393.2	3		28	-3.45	2
									HEILNEK		ASTE009266-PA	1	441.739	882.471	2		21.32	2.99	0
									EQAQQLLYWcR	C10(Carbamidomethyl)	ASTE009266-PA	7	747.867	1494.73	2	3.1	43.3	7.11	0
									NLDLSAVHR		ASTE009266-PA	1	512.781	1024.55	2		41.61	0.65	0
									ALPSSLAYGNELVVATPR		ASTE009266-PA	3	929.512	1858.02	2	5.68	106.35	5.67	0
									AFPTTLIELK		ASTE009266-PA	9	566.834	1132.66	2		42.39	-0.21	0
									MNDSADQLGR		ASTE009266-PA	2	553.749	1106.49	2	3.32	70.11	0.21	0
									DLDSLEHTVQILEDYKR		ASTE009266-PA	62	692.022	2074.05	3	5.38	44.27	2.35	1
									LGGLEPDLK		ASTE009266-PA	1	471.27	941.532	2	3.01	42.27	2.25	0
									YPQASDLHK		ASTE009266-PA	3	353.513	1058.53	3	2.28	40.17	-1.04	0
									HASNFTGEELQLYR		ASTE009266-PA	15	832.905	1664.8	2	4.45	58.92	0.09	0
									AEEQEQADSMIR		ASTE009266-PA	2	703.815	1406.62	2	1.95	63.18	0.46	0
									SLDNLmDLWK	M6(Oxidation)	ASTE009266-PA	1	625.813	1250.62	2	2.22	28.07	7.38	0
ASTE003515-PA	22.08	4	4	4	154	17.318	7.18	Proboscis,Midgut
									DDTVKGQLEGEEKPMNEMK		ASTE003515-PA	1	726.672	2178	3	5.85	57.83	-1.33	1
									AVFSVPK		ASTE003515-PA	1	374.223	747.438	2		56.98	-3.02	0
									GQLEGEEKPMNEMK		ASTE003515-PA	1	810.373	1619.74	2	4.14	59.9	-1.32	0
									QASSLGIR		ASTE003515-PA	1	416.238	831.468	2	2.3	46.02	-0.1	0
ASTE006476-PA	33.64	38	38	111	1436	164.951	7.06	Proboscis,Larvae,Fatbody,Malpighian tubules,Maxillary palps,Thorax,Midgut,Brain,Haemolymph,Male accessory glands,Ovary,Pupa,Salivary glands,Testis
									mDLQPADIIADEDVQLVMQR	N-Term(Acetyl)	ASTE006476-PA	1	1171.57	2342.13	2		10.51	-1.47	0
									YAPPAYDImSFLTSTTTR	M9(Oxidation)	ASTE006476-PA	6	1025.99	2050.98	2	1.74	33.99	-0.02	0
									SEGYSIVEHTK		ASTE006476-PA	2	417.206	1249.6	3		37.47	-1.79	0
									YANSDQLDEILEKVPGVIR		ASTE006476-PA	1	720.383	2159.14	3		55.03	0.45	1
									LHASSLILEER		ASTE006476-PA	5	634.356	1267.7	2		49.46	2.56	0
									LIVFENLK		ASTE006476-PA	14	488.296	975.585	2		28.59	-2.82	0
									YANSDQLDEILEK		ASTE006476-PA	2	769.372	1537.74	2		58.3	-0.33	0
									GNLENAIQVLcEMIK	C11(Carbamidomethyl)	ASTE006476-PA	2	866.444	1731.88	2		40.75	1.68	0
									NVLNHGDLWcNNILFK	C10(Carbamidomethyl)	ASTE006476-PA	3	978.992	1956.98	2	1.7	24.7	0.41	0
									mLPESNPK	M1(Oxidation)	ASTE006476-PA	1	466.231	931.454	2	1.94	38.56	-1.14	0
									AScDQYQLAGLIDSVLYR	C3(Carbamidomethyl)	ASTE006476-PA	2	1036.51	2072.01	2		97.78	-0.72	0
									LQDVMIGTRPFVPTAYFTK		ASTE006476-PA	3	728.722	2184.15	3		23.24	-0.99	0
									EIFVYNK		ASTE006476-PA	1	456.745	912.482	2	1.03	30.08	-0.31	0
									IYDFSKPSEVFR		ASTE006476-PA	4	496.589	1487.75	3		36.75	-0.74	0
									MIVFEDLR		ASTE006476-PA	1	511.771	1022.53	2	1.76	58.98	0.71	0
									IYELAKPSTVFR		ASTE006476-PA	1	712.401	1423.79	2	2.44	49.46	-0.48	0
									LLPELAQHcDGIGNVVPNTYLTKPAK	C9(Carbamidomethyl)	ASTE006476-PA	1	950.175	2848.51	3	2.85	17.12	2.64	0
									KGNLENAIQVLcEmIK	C12(Carbamidomethyl); M14(Oxidation)	ASTE006476-PA	8	938.49	1875.97	2	2.03	24.9	2.96	1
									LVDFQFSR		ASTE006476-PA	12	506.266	1011.52	2		44.57	-1.8	0
									LSEEPVGYLGDHYLLDVNLR		ASTE006476-PA	1	768.062	2302.17	3	4.8	39.23	-0.23	0
									MIVFEDLRR		ASTE006476-PA	1	393.549	1178.63	3	2.64		-2.15	1
									NSEQLEFILQR		ASTE006476-PA	2	688.862	1376.72	2	2.21	97	-0.76	0
									MLPESNPK		ASTE006476-PA	1	458.234	915.46	2	1.51	35.06	-0.65	0
									LVSYQVR		ASTE006476-PA	1	432.751	864.494	2	1.48		0.66	0
									LQDVmIGTRPFVPTAYFTK	M5(Oxidation)	ASTE006476-PA	1	734.055	2200.15	3	3.79	36.42	1.39	0
									NVLNHGDLWcNNVMFR	C10(Carbamidomethyl)	ASTE006476-PA	2	663.645	1988.92	3	5.32	63	-0.88	0
									EVFASGPLSYR		ASTE006476-PA	2	613.315	1225.62	2		13.39	0.44	0
									YEMIPTSVDSGIDGEGHPSEGR		ASTE006476-PA	1	778.349	2333.03	3	4.16	55.16	-1.08	0
									ENVYINSDTYVR		ASTE006476-PA	4	736.855	1472.7	2	2.81	56.28	0.47	0
									LHAMSLIYEER		ASTE006476-PA	3	681.346	1361.68	2	1.27	53.51	-2.31	0
									YAPPAYDIMSFLTSTTTR		ASTE006476-PA	3	1018	2034.98	2		52.98	-1.14	0
									KGNLENAIQVLcEMIK	C12(Carbamidomethyl)	ASTE006476-PA	2	620.662	1859.97	3		52.01	0.15	1
									EQQEDYESTcTTNDTTVAASGR	C10(Carbamidomethyl)	ASTE006476-PA	4	1232.02	2463.03	2	6.11	117.45	1.67	0
									VALQAVAK		ASTE006476-PA	1	400.255	799.503	2		61.59	-1.01	0
									NVLNHGDLWcNNVmFR	C10(Carbamidomethyl); M14(Oxidation)	ASTE006476-PA	1	668.978	2004.92	3	3.2	18.89	1	0
									KIYDFSKPSEVFR		ASTE006476-PA	2	539.287	1615.85	3		51.03	-1.74	1
									QEMSFFIK		ASTE006476-PA	1	515.258	1029.51	2	1.78	42.72	0.54	0
									NLLDFEHLK		ASTE006476-PA	8	376.873	1128.6	3		21.22	-1.51	0
ASTE003481-PA	18.24	6	9	17	466	53.084	7.43	Fatbody,Midgut,Brain,Haemolymph,Salivary glands,Testis
									LLDQVVR		ASTE003481-PA	1	421.758	842.509	2		37.9	-0.61	0
									GGLDFFK		ASTE003481-PA	1	392.206	783.405	2	2.16	43.4	2.1	0
									YDNLVGMFNPK		ASTE010847-PA;ASTE003481-PA	3	649.316	1297.62	2	2.61	58.87	-0.5	0
									ISFDLSLAR		ASTE003481-PA	1	511.288	1021.57	2	2.53	40.48	0.79	0
									LAILNQLWTAGFK		ASTE003481-PA	1	737.922	1474.84	2	4.18	91.36	-2.74	0
									YDNLVGmFNPK	M7(Oxidation)	ASTE010847-PA;ASTE003481-PA	1	657.315	1313.62	2	3.26	71.96	2.55	0
									DQGGEILALR		ASTE010847-PA;ASTE003481-PA	6	536.294	1071.58	2	3.07	56.33	0.37	0
									QLTEDEQLK		ASTE003481-PA	2	552.288	1103.57	2	2.4	43.94	9.7	0
									LLFEYcEIFK	C6(Carbamidomethyl)	ASTE003481-PA	1	681.344	1361.68	2	2.52	20.39	-0.42	0
ASTE008792-PA	16.48	13	13	27	1068	124.843	6.87	Proboscis,Fatbody,Maxillary palps,Thorax,Salivary glands
									AVHNEAFLVYPNMLELK		ASTE008792-PA	3	663.351	1988.04	3		47.85	3.08	0
									LTYNFIVETK		ASTE008792-PA	2	614.337	1227.67	2		47.85	3.21	0
									LVTLLQR		ASTE008792-PA	3	421.776	842.546	2	1.92	30.63	-0.32	0
									YILHTMVR		ASTE008792-PA	2	516.787	1032.57	2	1.64	53.1	1.22	0
									NGAAPAAEAAPAAEVAPQEAAPEPPKDAAPEEPK		ASTE008792-PA	2	1088.2	3262.6	3		26.89	3.8	1
									HLYEAIVELLQK		ASTE008792-PA	2	728.414	1455.82	2		67.56	0.65	0
									VNEYVQYGTVADR		ASTE008792-PA	1	757.369	1513.73	2		57.29	1.29	0
									FTTLSLEGVGDRK		ASTE008792-PA	1	474.922	1422.75	3		49.78	-4.27	1
									YDDLVENR		ASTE008792-PA	3	512.24	1023.47	2	2.43	65.15	-0.87	0
									SVYLNTVNVLR		ASTE008792-PA	4	639.363	1277.72	2		32.5	-2.68	0
									YLSIRPYFETPQEAIEWDKLQK		ASTE008792-PA	1	918.81	2754.42	3		54.14	0.85	1
									SHFEETDNcELK	C9(Carbamidomethyl)	ASTE008792-PA	1	754.821	1508.64	2		50.84	2.18	0
									TPEDVAQWR		ASTE008792-PA	2	551.272	1101.54	2	3.23	41.34	3.65	0
ASTE008594-PA	16.42	1	1	1	67	7.605	8.16	Brain
									DFLDQYYSSIR		ASTE008594-PA	1	703.832	1406.66	2	2.64	66.7	-0.84	0
ASTE002579-PA	3.23	1	1	1	279	31.474	7.01	Midgut
									DMQTNVNLK		ASTE002579-PA	1	531.766	1062.52	2	1.76	23.6	-0.5	0
ASTE011586-PA	6.63	3	3	5	558	60.751	9.89	Midgut,Brain
									TYEQYLVR		ASTE011586-PA	1	536.278	1071.55	2	1.44	29.91	1.57	0
									ANTSTLVAPYR		ASTE011586-PA	2	596.821	1192.63	2	2.18	73.72	2.58	0
									TSSTAPLYPR		ASTE011586-PA	2	546.789	1092.57	2	1.78	44.07	1.43	0
ASTE008263-PA	52.27	20	20	101	463	51.62	5.14	Proboscis,Legs,Fatbody,Malpighian tubules,Midgut,Brain,Haemolymph,Male accessory glands,Antennaex,Ovary,Pupa,Salivary glands,Testis
									LMDKVPGILK		ASTE008263-PA	1	557.338	1113.67	2	2.06	57.13	-0.78	1
									LQDLLDGFIRK		ASTE008263-PA	1	659.381	1317.76	2	3.07	50.97	1.88	1
									NMTVSDDFDKSEK		ASTE008263-PA	4	505.893	1515.66	3	1.11	26.72	-0.16	1
									FVLcPEcDNPETDLIVSSK	C4(Carbamidomethyl); C7(Carbamidomethyl)	ASTE008263-PA	3	1112.02	2223.03	2	3.56	70.84	2.05	0
									ELVTEASR		ASTE008263-PA	1	452.74	904.474	2	1.56	25.85	0.09	0
									TVIVNmAEVAR	M6(Oxidation)	ASTE008263-PA	1	609.829	1218.65	2	2.39	59.12	-0.79	0
									INIFYELVKR		ASTE008263-PA	5	432.256	1294.75	3	3.23	35.96	0.64	1
									NPPNVNPASQGASLTEGK		ASTE008263-PA	9	890.946	1780.88	2	3.39	109.54	1.64	0
									NMTVSDDFDK		ASTE008263-PA	2	586.25	1171.49	2	1.61	55.21	-0.58	0
									LFYDSDVLDEK		ASTE008263-PA	8	672.321	1343.63	2	2.65	55.82	-2.05	0
									DANELDNVQVHK		ASTE008263-PA	14	461.229	1381.67	3	3.17	25.23	0.35	0
									YFGcELGAQTQFDHK	C4(Carbamidomethyl)	ASTE008263-PA	2	600.938	1800.8	3	0.96	16.18	-1.01	0
									NPPNVNPASQGASLTEGKR		ASTE008263-PA	7	646.337	1936.99	3	5.84	58.08	5.92	1
									TVIVNMAEVAR		ASTE008263-PA	4	601.832	1202.66	2	1.57	57.68	-0.16	0
									LQDLLDGFIR		ASTE008263-PA	19	595.329	1189.65	2	2.5	53.65	-5.93	0
									YFGcELGAQTQFDHKNER	C4(Carbamidomethyl)	ASTE008263-PA	2	1100.49	2199.98	2	3.67	106.96	-3.05	1
									EVAAQIHER		ASTE008263-PA	6	526.778	1052.55	2	2.41	49.08	-0.34	0
									AcGFHGPLEVNHK	C2(Carbamidomethyl)	ASTE008263-PA	2	489.241	1465.71	3	4.56	22.95	4.88	0
									aTVNVNR	N-Term(Acetyl)	ASTE008263-PA	3	408.223	815.438	2		44.91	0.94	0
									NVTDIFYR		ASTE008263-PA	7	514.263	1027.52	2	1.72	53.69	-2.21	0
ASTE011428-PA	50.39	9	9	64	254	28.239	6.73	Proboscis,Legs,Fatbody,Maxillary palps,Thorax,Midgut,Brain,Testis,Male accessory glands,Antennaex,Ovary,Pupa,Salivary glands,Malpighian tubules
									ELAAGVPLNR		ASTE011428-PA	7	520.3	1039.59	2		40.24	3.16	0
									DTLVPLEWGQTTFDELAK		ASTE011428-PA	20	1032.02	2063.03	2		65.66	-1.07	0
									VIDFVQK		ASTE011428-PA	2	424.748	848.488	2	0.86		0.27	0
									VIIPTAPVQPYTPmGGENSNVWFNR	M14(Oxidation)	ASTE011428-PA	1	935.137	2803.39	3		51.09	2.88	0
									IIPEPTDDAPEPSKPETTTK		ASTE011428-PA	20	722.702	2166.09	3		28.6	5.04	0
									IEMDcPEIR	C5(Carbamidomethyl)	ASTE011428-PA	1	581.767	1162.53	2	2.89	57.02	2.37	0
									TSLASIYDTVNEMIVR		ASTE011428-PA	7	906.466	1811.92	2		80.48	2.48	0
									HAGTLIFFHGSGDTGSGLTEWIR		ASTE011428-PA	4	820.409	2459.21	3	4.83	43.64	1.45	0
									VIIPTAPVQPYTPMGGENSNVWFNR		ASTE011428-PA	2	929.804	2787.4	3	7.64	64.8	1.95	0
ASTE004281-PA	43.28	10	10	35	305	35.274	9.31	Proboscis,Legs,Fatbody,Midgut,Male accessory glands,Malpighian tubules
									LAVFDGKK		ASTE004281-PA	1	439.26	877.512	2	1.88	47.31	-2.11	1
									IYQHTPQEHVITNVVSGR		ASTE004281-PA	5	693.365	2078.08	3	3.67	32.5	1.6	0
									LQKYNLPDTVVWNPWMEK		ASTE004281-PA	1	754.386	2261.14	3	1.57		0.27	1
									LPSGDVEAVFSLMDNEITR		ASTE004281-PA	9	698.348	2093.03	3	2.98	47.26	2.95	0
									GGIPFVFPQFGPWNFGPQHGFGR		ASTE004281-PA	8	849.424	2546.26	3	4.86	41.45	1.67	0
									cQITGLHGcTFVDK	C1(Carbamidomethyl); C9(Carbamidomethyl)	ASTE004281-PA	2	545.925	1635.76	3	2.89	24.16	-1.43	0
									DGAIYQEGR		ASTE004281-PA	2	504.741	1008.48	2	2.47	65.8	0.6	0
									YNLPDTVVWNPWmEK	M13(Oxidation)	ASTE004281-PA	2	954.454	1907.9	2	2.26	13.53	0.37	0
									APERLPSGDVEAVFSLMDNEITR		ASTE004281-PA	4	849.426	2546.26	3	6.78	74.65	3.3	1
									SMWNYPFR		ASTE004281-PA	1	550.753	1100.5	2	1.65	41.51	0.19	0
ASTE007863-PA	6.91	3	3		593	66.377	6.62	Midgut,Brain,Salivary glands
									ESLDGLEEEDDDGSLYK		ASTE007863-PA	2	957.411	1913.82	2	4.13	74.93	0.76	0
									HPDLTRPVEPHDR		ASTE007863-PA	3	392.954	1568.79	4	2.78	23.58	0.92	0
									LIcHASGDFNK	C3(Carbamidomethyl)	ASTE007863-PA	1	631.305	1261.6	2	2.92	37.59	2.79	0
ASTE006078-PA	37.11	71	71	171	2439	277.254	4.88	Brain,Fatbody,Midgut,Antennaex,Ovary,Pupa,Salivary glands,Testis,Malpighian tubules
									EDLNESLLK		ASTE006078-PA	1	530.78	1060.55	2	1.49	14.78	-0.19	0
									RAAYLEDELR		ASTE006078-PA	2	618.325	1235.64	2	2.31	39.01	4.1	1
									ASETELLQQEIALLK		ASTE006078-PA	4	562.651	1685.94	3	1.82	39.73	3.46	0
									LTEENTVLAQR		ASTE006078-PA	5	637.342	1273.68	2	1.66	80.98	1.55	0
									DIDALVDAK		ASTE006078-PA	1	480.257	959.506	2	1.88	50.18	1.32	0
									FASSTPGEHEYGTSGEcSIDASPDR	C17(Carbamidomethyl)	ASTE006078-PA	1	886.375	2657.11	3	4.71	91.58	1.64	0
									LLELYGYDPLEK		ASTE006078-PA	4	726.887	1452.77	2	2.3	73.18	2.78	0
									IISLEQTLASQDLEMER		ASTE006078-PA	2	988.505	1976	2	5.38	87.46	0.9	0
									KYTRPDPAPPAR		ASTE006078-PA	1	456.918	1368.74	3	4.07	25.53	0.42	1
									SVLNDAENMSEDRDEALGTIGTLNAK		ASTE006078-PA	4	921.775	2763.31	3	2.54	41.32	0.55	1
									LSEADQANAELR		ASTE006078-PA	4	658.825	1316.64	2	1.4	64.09	-0.7	0
									TLQQQTADADQR		ASTE006078-PA	5	687.834	1374.66	2	1.71	86.32	0.15	0
									TQNEEQAHELATVR		ASTE006078-PA	2	813.397	1625.79	2	1.74	78.83	-1.25	0
									FELQAETDEAK		ASTE006078-PA	3	640.804	1280.6	2	1.27	75.08	-0.41	0
									ASETELLQQEIALLKHELEVAcEK	C22(Carbamidomethyl)	ASTE006078-PA	1	927.817	2781.43	3	6.99	61.43	0.43	1
									RTEGDEcGSAASLPIADVPFDK	C7(Carbamidomethyl)	ASTE006078-PA	2	779.034	2335.09	3	1.73	39.4	0.1	1
									DKLQQDcEQLQR	C7(Carbamidomethyl)	ASTE006078-PA	4	520.919	1560.74	3	2.11	41.54	-1.16	1
									IMNEEKETIR		ASTE006078-PA	2	421.552	1262.64	3	2.91	49.6	0.88	1
									SDLSTLEAK		ASTE006078-PA	2	482.253	963.499	2	1.63	63.47	0.02	0
									MNQQMAELR		ASTE006078-PA	1	560.765	1120.52	2	1.62	90.3	-1.41	0
									LQEAHQENLR		ASTE006078-PA	2	619.318	1237.63	2	2.01	71.83	-0.56	0
									VELMQEK		ASTE006078-PA	1	438.728	876.449	2	2	39.97	-0.5	0
									ADAIALSR		ASTE006078-PA	2	408.732	816.457	2	1.5	27.37	-0.22	0
									ELMDKVELFTDER		ASTE006078-PA	1	542.268	1624.79	3	1.47	44.01	-0.38	1
									QQLVGTLQTNQQER		ASTE006078-PA	2	821.928	1642.85	2	1.69	74.85	-0.76	0
									AGWETSLNQYR		ASTE006078-PA	3	662.817	1324.63	2	3.33	60.78	-0.54	0
									YHmESEGDSNREELQR	M3(Oxidation)	ASTE006078-PA	2	499.717	1995.85	4	2.98	25.04	-0.78	1
									LYHLNNELHR		ASTE006078-PA	3	436.898	1308.68	3	1.41	38.54	-0.08	0
									ALEAAELQQR		ASTE006078-PA	4	564.804	1128.6	2	1.65	61.41	-0.71	0
									DIQIEELK		ASTE006078-PA	2	494.272	987.536	2	1.63	50.79	0.19	0
									TLQDEFEQQK		ASTE006078-PA	3	633.305	1265.6	2	1.54		1.55	0
									HKLEATQQTLGR		ASTE006078-PA	3	691.382	1381.76	2	2.22	48.27	0.79	1
									SLTGVPADERPVSSLSGPQDLTSK		ASTE006078-PA	3	814.422	2441.25	3	2.61	22.78	-0.28	0
									EHTIETLQQQLSmLQDQLQQAmSSQELLQGTQK	M13(Oxidation); M22(Oxidation)	ASTE006078-PA	1	1282.3	3844.89	3	2.26	23.39	4.81	0
									VVFVQEFEQLEMEKR		ASTE006078-PA	1	637.666	1910.98	3	3.83	44.06	8.69	1
									AGSNSASTQSLAPIDQGVALK		ASTE006078-PA	2	1008.02	2015.04	2		43.66	-0.19	0
									cHEQLAAVR	C1(Carbamidomethyl)	ASTE006078-PA	1	361.851	1083.54	3	2.65	23.24	1.05	0
									SVSHSFLDPGPAHESR		ASTE006078-PA	2	861.914	1722.82	2	1.6	24.8	0.65	0
									LDMLESAcEK	C8(Carbamidomethyl)	ASTE006078-PA	1	598.269	1195.53	2	2.12	40.33	-1.97	0
									DSNEQFNEELTIFEDSVR		ASTE006078-PA	1	1086.49	2171.98	2	2.61	116.28	2.18	0
									NDEILQLK		ASTE006078-PA	2	486.772	972.536	2	2.21	57.55	-0.27	0
									AELSEVQR		ASTE006078-PA	1	466.245	931.484	2	1.95	49.71	-0.81	0
									AELQcQVDALQSVESELQTcRDEMQTLR	C5(Carbamidomethyl); C20(Carbamidomethyl)	ASTE006078-PA	1	1113.19	3337.54	3	3.46	26.87	-1.02	1
									EMMQQEITDLK		ASTE006078-PA	2	683.324	1365.64	2	1.47	54.27	1.18	0
									GTVEILQQTASER		ASTE006078-PA	3	716.374	1431.74	2	2.05	92.04	-1.82	0
									SEVTELR		ASTE006078-PA	2	417.221	833.435	2	1.1		-1.21	0
									DLANMPVEAAAK		ASTE006078-PA	4	615.314	1229.62	2	2.25	28.32	0.81	0
									VQQVTATLQTR		ASTE006078-PA	7	622.851	1244.7	2	1.87	71.63	-0.13	0
									NSDEMLER		ASTE006078-PA	1	497.219	993.431	2	1.6	15.99	0.5	0
									TVEQHQTEVGDLR		ASTE006078-PA	2	504.586	1511.74	3	1.33	65.34	-1.1	0
									LEDFHNQTLLLGR		ASTE006078-PA	1	778.415	1555.82	2	2.98	101.86	0.09	0
									LSELQSISYSK		ASTE006078-PA	3	627.833	1254.66	2	2.03	79.54	0.19	0
									YHMESEGDSNREELQR		ASTE006078-PA	2	495.718	1979.85	4	2.6	27.23	-0.46	1
									SEPDGSGPVQDTLEPR		ASTE006078-PA	2	842.394	1683.78	2	3.36	91.28	-0.42	0
									ESATASSETDELR		ASTE006078-PA	4	698.316	1395.62	2	1.88	111.57	0.6	0
									AAYLEDELR		ASTE006078-PA	5	540.271	1079.53	2	1.61	66.41	-2.51	0
									LLQQSYSISNEEALAR		ASTE006078-PA	2	911.47	1821.93	2	1.84	88.04	-0.63	0
									NVQcAELER	C4(Carbamidomethyl)	ASTE006078-PA	2	559.769	1118.53	2	2.2	29.86	3.48	0
									SSDDEPELLK		ASTE006078-PA	1	566.772	1132.54	2	2.36	53.06	-0.73	0
									ELDILNQQILHDLQFEDR		ASTE006078-PA	1	747.05	2239.13	3	1.99	54.68	-0.58	0
									TAELLLLQR		ASTE006078-PA	5	528.826	1056.64	2		42.3	3.29	0
									VDDATVQEVLER		ASTE006078-PA	5	687.349	1373.69	2	2.03	101.76	-0.13	0
									QQLQEAEQVR		ASTE006078-PA	4	614.818	1228.63	2	2.67	67.96	0.11	0
									LEQVTGEAER		ASTE006078-PA	2	566.285	1131.56	2	1.91	77.95	-1.16	0
									TELTDALAEIER		ASTE006078-PA	3	680.854	1360.7	2		74.27	3.74	0
									HIATLEDDLHAK		ASTE006078-PA	1	454.905	1362.7	3	1.56	46.3	-0.26	0
									LNQYAAENAELLGR		ASTE006078-PA	4	781.403	1561.8	2	3.34	85.82	1.07	0
									DAGVPANSLELQLADLEHR		ASTE006078-PA	3	1024.53	2048.04	2	2.15	110.31	0.72	0
									GVEIQMLR		ASTE006078-PA	2	473.263	945.519	2	2.28	31.19	-0.07	0
									LQQDcEQLQR	C5(Carbamidomethyl)	ASTE006078-PA	2	659.315	1317.62	2	1.21	67.08	0.74	0
									TYSGELATAK		ASTE006078-PA	1	520.766	1040.53	2	1.63	35.62	-0.45	0
ASTE000576-PA	6.1	4	4	19	705	76.263	6.18	Proboscis,Larvae,Fatbody,Maxillary palps,Midgut,Brain,Salivary glands
									IQAQSPLYETR		ASTE000576-PA	3	653.345	1305.68	2	2.67	57.58	2.3	0
									VLQSIANENVIPGIGK		ASTE000576-PA	13	826.472	1651.94	2	1.76	21.02	-1.13	0
									VLQSIANENVIPGIGKLGK		ASTE000576-PA	2	650.717	1950.14	3	4.54	23.16	-1	1
									YGLGSDDSSPTER		ASTE000576-PA	1	692.304	1383.6	2	2.36	87.74	-1.05	0
ASTE006409-PA	76.69	24	24	415	296	33.654	8.29	Proboscis,Legs,Brain,Larvae,Fatbody,Head,Malpighian tubules,Maxillary palps,Thorax,Midgut,Testis,Male accessory glands,Antennaex,Ovary,Pupa,Salivary glands
									SLLDTYEKAAENWFIK		ASTE006409-PA	1	643.332	1927.98	3	5.52	56.86	0.38	1
									QRFEDcVLYEQPDHER	C6(Carbamidomethyl)	ASTE006409-PA	12	707.654	2120.95	3	6.51	37.96	0.56	1
									RVPTIDQcYTDDAVcIFEANQQFR	C8(Carbamidomethyl); C15(Carbamidomethyl)	ASTE006409-PA	41	982.789	2946.35	3	5.23	69.14	0.3	1
									AFLMNLK		ASTE006409-PA	2	418.738	836.47	2	1.16	43.17	-0.39	0
									RVPTIDQcYTDDAVcIFEANQQFRR	C8(Carbamidomethyl); C15(Carbamidomethyl)	ASTE006409-PA	5	776.369	3102.45	4	4.85	58.05	0.6	2
									SLLDTYEKAAENWFIKYGDLGGYANAK		ASTE006409-PA	3	1013.18	3037.52	3	6.39	83.1	9.16	2
									AAENWFIK		ASTE006409-PA	58	489.756	978.504	2		43.31	-0.38	0
									DKMVDNEILSILR		ASTE006409-PA	29	515.948	1545.83	3		47.27	-1.45	1
									MVDNEILSILR		ASTE006409-PA	43	651.858	1302.71	2		71.11	0.46	0
									VLIHDASELPDLYSSTPGGTLYSTTPGGTR		ASTE006409-PA	11	1035.85	3105.53	3		38.19	-0.96	0
									TPPNNVPLNLLR		ASTE006409-PA	24	674.39	1347.77	2	1.78	43.31	-1.11	0
									QVAGEDEAASEH		ASTE006409-PA	7	621.766	1242.53	2	2.11	61.23	1.08	0
									SGGGSPNSKPLTTLSVK		ASTE006409-PA	6	815.443	1629.88	2	3.04	76.35	-1	0
									FEDcVLYEQPDHERK	C4(Carbamidomethyl)	ASTE006409-PA	1	491.975	1964.88	4	3.93	10.5	-1.06	1
									QRFEDcVLYEQPDHERK	C6(Carbamidomethyl)	ASTE006409-PA	2	563.016	2249.04	4	3.69	13.74	0.52	2
									DKmVDNEILSILR	M3(Oxidation)	ASTE006409-PA	36	521.279	1561.82	3		55.05	-1.15	1
									mVDNEILSILR	M1(Oxidation)	ASTE006409-PA	45	659.856	1318.7	2		72.92	0.98	0
									QTYPWYHQQFR		ASTE006409-PA	33	518.581	1553.73	3		23.46	0.58	0
									VPTIDQcYTDDAVcIFEANQQFR	C7(Carbamidomethyl); C14(Carbamidomethyl)	ASTE006409-PA	19	930.757	2790.26	3		26.44	2.76	0
									HGPVGTGMK		ASTE006409-PA	4	442.227	883.446	2	2.36	30.45	0.74	0
									HGPVGTGmK	M8(Oxidation)	ASTE006409-PA	3	450.223	899.44	2	1.52	27.16	-0.95	0
									VPTIDQcYTDDAVcIFEANQQFRR	C7(Carbamidomethyl); C14(Carbamidomethyl)	ASTE006409-PA	1	982.79	2946.36	3		39.25	1.92	1
									NPLESFLNAVQATIDGPVTWFR		ASTE006409-PA	28	825.761	2475.27	3		22.98	1.17	0
									EKIVEPNR		ASTE006409-PA	1	492.777	984.547	2	1.96	47.05	-0.71	1
ASTE003740-PA	37.02	25	25	110	1283	143.042	6.74	Brain,Midgut,Male accessory glands,Salivary glands
									FGLQSHQIEDYR		ASTE003740-PA	10	498.244	1492.72	3	4.06	36.01	-0.8	0
									ELRLEVDGK		ASTE003740-PA	1	529.796	1058.59	2	3.58	36.85	0.96	1
									SGGcQGLELISSFRK	C4(Carbamidomethyl)	ASTE003740-PA	2	546.947	1638.83	3	5.71	56.43	-0.12	1
									EGNLPQSSK		ASTE003740-PA	1	480.243	959.48	2	2	49.78	0.32	0
									cRTVPLSPVSFTFYDDDDSVSSAIGSmAVEK	C1(Carbamidomethyl); M27(Oxidation)	ASTE003740-PA	1	1132.87	3396.59	3		13.51	9.12	1
									SGGcQGLELISSFR	C4(Carbamidomethyl)	ASTE003740-PA	5	755.871	1510.73	2	4.22	95.15	2.14	0
									QDPHGPNLALFVGNLPPGLSQR		ASTE003740-PA	5	776.416	2327.24	3	1.29	29.07	3.86	0
									NYEHILTEFLGFENK		ASTE003740-PA	15	618.64	1853.9	3	3.76	35.93	-0.76	0
									LQVENAYVIIPVDNDTTVKDLIcESLKK	C23(Carbamidomethyl)	ASTE003740-PA	3	805.182	3217.71	4	3.43	12.69	1.57	2
									TcWSYEcLTGYR	C2(Carbamidomethyl); C7(Carbamidomethyl)	ASTE003740-PA	1	798.335	1595.66	2	3.46	44.9	0.71	0
									NNIPAEcTFGTLQPIYLPPHAVSIPR	C7(Carbamidomethyl)	ASTE003740-PA	6	969.172	2905.5	3	4.76	49.32	-0.23	0
									DVIDAEEIR		ASTE003740-PA	2	530.269	1059.53	2	1.28	53.45	-0.07	0
									EDQFSKPNHWDGmLEVVGVTGVVHLGQIQSGLR	M13(Oxidation)	ASTE003740-PA	1	730.574	3648.84	5	3.35	13.84	4.39	0
									IHLHSDIPVQVDGEPWVQSPGDVVVLK		ASTE003740-PA	7	741.647	2963.57	4	4.41	32.29	1.06	0
									LLNPYQVFDLDNGGPLPGLYVFR		ASTE003740-PA	11	869.792	2607.36	3	1.29		0.77	0
									cEWcGTTTHGGcR	C1(Carbamidomethyl); C4(Carbamidomethyl); C12(Carbamidomethyl)	ASTE003740-PA	2	527.872	1581.6	3	3.57	35.49	0.63	0
									FSSIGPIYYEYGSLVITYENASK		ASTE003740-PA	4	1301.14	2601.28	2	2.48	49.92	0.45	0
									WGAGYTGGEDPLNLLR		ASTE003740-PA	6	859.93	1718.85	2	2.22	90.4	2.01	0
									LQVENAYVIIPVDNDTTVK		ASTE003740-PA	3	1066.07	2131.12	2	1.87	82.23	-1.71	0
									NPVAHcWSEPSHHK	C6(Carbamidomethyl)	ASTE003740-PA	10	843.385	1685.76	2	4.15	55.64	1.81	0
									IAQGGHIK		ASTE003740-PA	2	412.243	823.478	2	1.81	35.55	-0.74	0
									KLLNPYQVFDLDNGGPLPGLYVFR		ASTE003740-PA	1	912.492	2735.46	3	7.91	66.48	2.25	1
									aGGEHTFGR	N-Term(Acetyl)	ASTE003740-PA	3	487.228	973.449	2		62.62	0.18	0
									cVTNIVTPcTGIAPYLIR	C1(Carbamidomethyl); C9(Carbamidomethyl)	ASTE003740-PA	1	1024.54	2048.07	2	5.16	85.56	-0.17	0
									SISEEITAENR		ASTE003740-PA	7	624.807	1248.61	2	2.7	47.2	0.82	0
ASTE009239-PA	28.28	43	43		2917	329.354	7.4	Fatbody,Malpighian tubules,Midgut,Male accessory glands,Ovary,Salivary glands
									VFAELWHFTGQGDGAER		ASTE009239-PA	1	640.643	1919.91	3	3.9	44.63	5.57	0
									ATDDALQPLLELVVALAK		ASTE009239-PA	2	940.54	1880.07	2	3.3	58.45	-1.16	0
									GFKETATLPLLLFNK		ASTE009239-PA	1	564.663	1691.97	3	2.45	30.42	0.81	1
									LDDWNPFPVNVVSK		ASTE009239-PA	3	815.418	1629.83	2	1.6	17.81	1.41	0
									KIVYQIFESLAHR		ASTE009239-PA	1	535.307	1603.91	3	6.09	70.35	6.36	1
									mLVDLFTPFR	M1(Oxidation)	ASTE009239-PA	1	627.834	1254.66	2	2.96	62.02	4.69	0
									LLGDALSVTVSQLIR		ASTE009239-PA	1	792.973	1584.94	2	3.28	106.75	4.11	0
									KVSEIGGEGHAQASEDVR		ASTE009239-PA	2	623.643	1868.91	3	6	70.87	1.81	1
									LLLGWcQSK	C6(Carbamidomethyl)	ASTE009239-PA	1	552.797	1104.59	2	2.19	38.02	0.12	0
									MVGKPGVTTHPQcR	C13(Carbamidomethyl)	ASTE009239-PA	3	523.267	1567.79	3	4.61	65.39	1.16	0
									TLYLLAR		ASTE009239-PA	1	425.263	849.519	2	1.67	33.21	0.12	0
									STAEPNEPPLFR		ASTE009239-PA	4	679.341	1357.67	2	2.77	53.83	-0.62	0
									KVSEIGGEGHAQASEDVRR		ASTE009239-PA	2	675.676	2025.01	3	2.96	24.27	1.38	2
									VSLLNMLFPILSR		ASTE009239-PA	1	751.944	1502.88	2	2	48.33	3.07	0
									TIIPNLLSSFNFATEAPVSVASSSGHVDRK		ASTE009239-PA	1	786.921	3144.66	4	2.84	15	8.83	1
									SITAALDDGAEVVAVPTPFK		ASTE009239-PA	1	1001.03	2001.06	2	2.73	43.12	4.08	0
									LLNDVREPLR		ASTE009239-PA	1	408.907	1224.7	3	1.98	19.06	-0.77	1
									TLAADcIEALLK	C6(Carbamidomethyl)	ASTE009239-PA	1	659.36	1317.71	2	3.56	96.6	2.75	0
									VETDYELPESEDGTFFQQALVK		ASTE009239-PA	1	1273.1	2545.2	2	2.29	33.58	0.43	0
									MLVDLFTPFR		ASTE009239-PA	1	619.839	1238.67	2	2.9	64.31	8.03	0
									ELTAQDVAGTR		ASTE009239-PA	3	580.799	1160.59	2	2.6	50.88	-0.13	0
									HLPLTQLEASR		ASTE009239-PA	2	632.854	1264.7	2	2.04	54.67	-0.49	0
									VSEIGGEGHAQASEDVR		ASTE009239-PA	1	580.945	1740.82	3	3.23	33.25	3.98	0
									VLQLVLK		ASTE009239-PA	3	406.784	812.561	2	2.07		0.79	0
									VSEIGGEGHAQASEDVRR		ASTE009239-PA	2	632.978	1896.92	3	3.06	17.62	1.7	1
									LALMAEANPAATDR		ASTE009239-PA	1	722.368	1443.73	2	2.93	95.02	1.6	0
									GTIDGcLAAFDAQR	C6(Carbamidomethyl)	ASTE009239-PA	1	747.855	1494.7	2	3.09	85.6	1.21	0
									DLLQYIR		ASTE009239-PA	1	460.765	920.523	2	1.9	36.19	3.23	0
									TLAQIEcVEPLIHTYR	C7(Carbamidomethyl)	ASTE009239-PA	1	648.341	1943.01	3	6.01	45.36	2.14	0
									LLQLSGIVLEHQYGR		ASTE009239-PA	1	575.994	1725.97	3	5.16	38.7	1.95	0
									TTVNFLLPIVSHYIcHDEYR	C15(Carbamidomethyl)	ASTE009239-PA	1	620.066	2477.24	4	2.8	14.49	5.29	0
									LLSTFSSPSLEFK		ASTE009239-PA	1	728.394	1455.78	2	2.7	50.5	5.68	0
									NAQERMLVDLFTPFR		ASTE009239-PA	1	612.985	1836.94	3	1.19		-0.8	1
									ELATQLLLR		ASTE009239-PA	1	528.825	1056.64	2	2.31	71.85	0.52	0
									ATILTFIGR		ASTE009239-PA	2	496.302	991.597	2		46.4	3.64	0
									LLPLLDETSSPPHAIDFATEcLGYLVR	C21(Carbamidomethyl)	ASTE009239-PA	1	1009.86	3027.55	3	3.96	58.82	0.52	0
									VVQLIALAVETVVHLK		ASTE009239-PA	1	578.031	1732.08	3	5.08	67.34	2.93	0
									VISSDLLLILTR		ASTE009239-PA	1	671.919	1342.83	2	2.43	94.05	0.45	0
									LPIAIAIVK		ASTE009239-PA	1	469.326	937.646	2	2.9	52.4	1.1	0
									WVEQPDHAAR		ASTE009239-PA	2	403.533	1208.58	3	2.93	31.99	2.35	0
									ETATLPLLLFNK		ASTE009239-PA	1	680.401	1359.79	2	1.74	49.54	4.37	0
									LLIPYVK		ASTE009239-PA	1	423.279	845.55	2	1.85	35.93	0.67	0
									MSFLAGLLLK		ASTE009239-PA	1	546.828	1092.65	2	2.54	39.65	-0.47	0
ASTE004405-PA	28.46	4	4	19	130	14.421	4.27	Antennaex
									NLNAIENLcDR	C9(Carbamidomethyl)	ASTE004405-PA	7	666.324	1331.64	2	3.29	47.92	2.18	0
									AYSAFQcLK	C7(Carbamidomethyl)	ASTE004405-PA	2	544.264	1087.52	2		48.56	-3.06	0
									YLANEYPDDPVTHcFVR	C14(Carbamidomethyl)	ASTE004405-PA	9	1048.48	2095.95	2	4.15	67.1	0.41	0
									AYSAFQcLKEEYGmDQTGQN	C7(Carbamidomethyl); M14(Oxidation)	ASTE004405-PA	1	1178.5	2355.99	2		27.24	1.31	1
ASTE001365-PA	12.34	3	3		235	24.729	8.22	Brain,Testis
									ELGAAEIR		ASTE001365-PA	1	429.738	858.468	2	1.49	50.69	0.56	0
									VGLTGFEcR	C8(Carbamidomethyl)	ASTE001365-PA	1	519.757	1038.51	2	2.91	40.01	3.14	0
									YSDKHEcSFDYR	C7(Carbamidomethyl)	ASTE001365-PA	1	536.225	1606.66	3	2.27	19.8	0.1	1
ASTE008336-PA	25.43	22	22	66	1557	180.029	7.33	Proboscis,Legs,Fatbody,Maxillary palps,Midgut,Haemolymph,Male accessory glands,Antennaex,Salivary glands,Testis
									LQAEINELQSEIQQLTNTK		ASTE008336-PA	15	734.057	2200.16	3	5.36	53.39	4.42	0
									RTPNLFVLSVANNQLER		ASTE008336-PA	3	657.698	1971.08	3	3.56	35.68	1.73	1
									LVTLGLESVPIQTLQVLDLAHNHLLHVEYNQR		ASTE008336-PA	2	1221.67	3663	3		23.88	-1.7	0
									AQHEQLLQSLQTEIDDNLR		ASTE008336-PA	1	1126.07	2251.13	2		102.09	0	0
									SLPEGIFR		ASTE008336-PA	1	459.756	918.504	2	1.54		-0.14	0
									GLFNYLAmVGNGVQLNPK	M8(Oxidation)	ASTE008336-PA	1	976.008	1951.01	2		69.27	-1.26	0
									ALSNGAHLQELYLGFNNIR		ASTE008336-PA	2	710.709	2130.11	3		19.21	1.19	0
									LEIGDSDTNcKPDYQLEQNLccK	C10(Carbamidomethyl); C21(Carbamidomethyl); C22(Carbamidomethyl)	ASTE008336-PA	1	934.076	2800.21	3	5.96	47.09	-3	0
									GLFNYLAMVGNGVQLNPK		ASTE008336-PA	1	968.011	1935.02	2		65.4	-0.43	0
									LIQYIHLTSSAEK		ASTE008336-PA	5	751.913	1502.82	2	4.15	49.44	-1.8	0
									TPNLFVLSVANNQLER		ASTE008336-PA	14	907.994	1814.98	2	2.29	82.24	2.82	0
									IEDETFR		ASTE008336-PA	2	455.219	909.432	2	1.87		0.38	0
									VLVLDRNNLR		ASTE008336-PA	1	606.366	1211.73	2		34.59	2.95	1
									ETDFPYLDR		ASTE008336-PA	2	578.27	1155.53	2	1.98	48.44	1.32	0
									AQHEQLLQSLQTEIDDNLRR		ASTE008336-PA	2	803.083	2407.23	3		25.03	0.66	1
									QLPSSSFLHmQSLR	M10(Oxidation)	ASTE008336-PA	1	823.919	1646.83	2		83.31	-0.6	0
									LYVSNNR		ASTE008336-PA	1	433.23	865.452	2		35.48	-0.89	0
									VIKDPmIPHSQNLHK	M6(Oxidation)	ASTE008336-PA	1	591.645	1772.92	3		19.09	-15.43	1
									INQVTGPLNDKLAILR		ASTE008336-PA	3	883.021	1765.03	2		89.38	0.69	1
									INQVTGPLNDK		ASTE008336-PA	3	599.816	1198.62	2		42.27	-14.81	0
									HLYLDHNSIVTLK		ASTE008336-PA	1	776.928	1552.85	2		43.38	-0.11	0
									ISGDSELETLTLSHNDWDcK	C19(Carbamidomethyl)	ASTE008336-PA	3	774.02	2320.05	3	5.81	56.43	2.66	0
ASTE011462-PA	51.75	64	64	1130	1633	186.902	6.64	Proboscis,Legs,Larvae,Fatbody,Malpighian tubules,Maxillary palps,Midgut,Brain,Testis,Antennaex,Ovary,Pupa,Salivary glands
									NTEPFHGcDEFMFSGQNEVQR	C8(Carbamidomethyl)	ASTE011462-PA	1	843.686	2529.04	3	4.89	50.01	-4.81	0
									TVFVAFFQGEQLK		ASTE011462-PA	48	757.406	1513.8	2		33.67	-0.83	0
									EIIDLEAQLEK		ASTE011462-PA	27	650.851	1300.69	2		13.78	-3.21	0
									SNYLELTELK		ASTE011462-PA	58	605.323	1209.64	2		34.43	2	0
									QRVLLNVAK		ASTE011462-PA	4	520.833	1040.66	2	3.12	52.79	0.21	1
									EKMPGFER		ASTE011462-PA	1	331.832	993.482	3	1.67	34.91	-0.29	1
									TGDSVHKIVFVAFFQGEQLK		ASTE011462-PA	2	750.735	2250.19	3	4.77	51.63	-0.47	1
									VSRGNIFLR		ASTE011462-PA	7	354.546	1061.62	3	2.61	42.15	1.04	1
									TENEIVELSENNNALLQNFmELTELK	M20(Oxidation)	ASTE011462-PA	3	1017.83	3051.48	3		53.15	-1.56	0
									SNVQNLEATGGEAANEGKPLGFVAGVITR		ASTE011462-PA	47	967.166	2899.48	3	5.34	75.8	-2.96	0
									TALVNGSAAVGSAVPSFLNIIATDEDPPTYNR		ASTE011462-PA	11	1087.55	3260.63	3		11.74	-2.77	0
									IVFVAFFQGEQLK		ASTE011462-PA	115	763.424	1525.84	2		29.76	-0.67	0
									AIYHTLNmFNVDVSK	M8(Oxidation)	ASTE011462-PA	4	589.961	1767.87	3		50.93	-3.27	0
									SIVLATVAK		ASTE011462-PA	8	451.29	901.572	2	2.1	25.25	0.57	0
									KYTSEIR		ASTE011462-PA	3	448.745	896.483	2	2	41.77	-0.41	1
									GRLGFVAGVIQR		ASTE011462-PA	15	424.921	1272.75	3		47.94	-3.49	1
									SNYLELTELKHVLER		ASTE011462-PA	2	615.334	1843.99	3		33.13	-2.31	1
									FTRGFQNLIESYGIATYR		ASTE011462-PA	1	712.702	2136.09	3	2.47	31.55	2.48	1
									mVLGQTQDQR	M1(Oxidation)	ASTE011462-PA	1	596.294	1191.58	2	2.45	65.87	1.29	0
									TQVFFSDK		ASTE011462-PA	23	486.247	971.486	2		29.66	2.65	0
									NQEPLETcK	C8(Carbamidomethyl)	ASTE011462-PA	1	559.761	1118.51	2	2.45	42.22	-0.22	0
									DSVQIPEcSVDDWPR	C8(Carbamidomethyl)	ASTE011462-PA	15	901.907	1802.81	2		52.04	3.37	0
									TENEIVELSENNNALLQNFMELTELK		ASTE011462-PA	3	1012.5	3035.49	3	5.67	97.51	-0.57	0
									DLTLNPGSIDYHTDIYPVGLDPVWQLATNK		ASTE011462-PA	18	1119.23	3355.68	3	5.33	44.85	-2.31	0
									AIYHTLNLFNMDVTKK		ASTE011462-PA	3	636.671	1908	3	6.66	66.45	-2.94	1
									VLLNVAK		ASTE011462-PA	18	378.753	756.498	2	1.82	48.9	-0.15	0
									NKEEIWQLFFGGR		ASTE011462-PA	1	812.419	1623.83	2		62.53	1.16	1
									AIYHTLNMFNVDVSK		ASTE011462-PA	11	584.629	1751.87	3	4.82	68.73	-3.14	0
									ERVIGFER		ASTE011462-PA	4	503.278	1005.55	2		31.05	0.66	1
									KcLFGEAWVPTAGLQDVK	C2(Carbamidomethyl)	ASTE011462-PA	9	1010.02	2019.03	2	6.43	103.04	-3.75	1
									EVPNWEIIVK		ASTE011462-PA	40	613.841	1226.67	2		21.29	-2.38	0
									KVcAGYHASLYPcPNEYSER	C3(Carbamidomethyl); C13(Carbamidomethyl)	ASTE011462-PA	1	801.027	2401.07	3	7.22	43.57	-2.06	1
									TQVFFSDKSNVQNLEATGGEAANEGKPLGFVAGVITR		ASTE011462-PA	3	1284.65	3851.95	3		23.68	-2.96	1
									VcAGYHASLYPcPNEYSEREEMLR	C2(Carbamidomethyl); C12(Carbamidomethyl)	ASTE011462-PA	1	977.764	2931.28	3	4.74	51.12	-3.18	1
									MVLGQTQDQR		ASTE011462-PA	8	588.294	1175.58	2		91.44	-1.98	0
									AIYHTLNMFNVDVSKK		ASTE011462-PA	8	627.329	1879.97	3	4.78	38.58	-1.11	1
									VcTGYHVSLYPcPSSGSER	C2(Carbamidomethyl); C12(Carbamidomethyl)	ASTE011462-PA	9	1078.48	2155.95	2	5	52.34	-2.24	0
									REIVKDSVAIPDMPEVIPR		ASTE011462-PA	3	722.063	2164.18	3	5.34	49.44	-1.97	2
									VcAGYHASLYPcPNEYSER	C2(Carbamidomethyl); C12(Carbamidomethyl)	ASTE011462-PA	9	758.328	2272.97	3	4.97	50.83	-2.31	0
									cLFGEAWVPTAGLQDVK	C1(Carbamidomethyl)	ASTE011462-PA	33	945.972	1890.94	2	4.97	82.54	-3.23	0
									TPNSREIIDLEAQLEK		ASTE011462-PA	1	619.33	1855.98	3	1.9		-0.01	1
									QVELEDPLEDPATGNEIFK		ASTE011462-PA	16	1072.52	2144.03	2		45.76	-3.7	0
									VcAGYHASLYPcPNEYSEREEmLR	C2(Carbamidomethyl); C12(Carbamidomethyl); M22(Oxidation)	ASTE011462-PA	2	983.103	2947.3	3	3.19	15.14	4.94	1
									GAIMLYFVFGAWSLFTLAILVMmEGLSAFLHTLR	M23(Oxidation)	ASTE011462-PA	1	959.504	3834.99	4	3.93		-6.7	0
									IEDLKmVLGQTQDQR	M6(Oxidation)	ASTE011462-PA	1	597.307	1789.91	3		46.4	-2.43	1
									KSTNEIWNIFFGGR		ASTE011462-PA	1	834.929	1668.85	2		96.49	0.26	1
									DLNADINmFQR	M8(Oxidation)	ASTE011462-PA	18	676.815	1352.62	2		65.73	-2.44	0
									EVPNWEIIVKK		ASTE011462-PA	11	452.261	1354.77	3		32.02	-3.92	1
									SNLIAEDPTAAQSR		ASTE011462-PA	68	736.869	1472.73	2		42.17	-1.97	0
									KDSVQIPEcSVDDWPR	C9(Carbamidomethyl)	ASTE011462-PA	10	965.949	1930.89	2	4.82	93.56	-2.93	1
									KFVSEVR		ASTE011462-PA	1	432.751	864.494	2	2.13	47.37	0	1
									LGFVAGVIQR		ASTE011462-PA	106	530.318	1059.63	2		44.83	-2.51	0
									QATLEESLVDPK		ASTE011462-PA	39	665.346	1329.68	2		43.1	-3.18	0
									EIIDLEAR		ASTE011462-PA	45	479.765	958.522	2		44.77	1.65	0
									DLNADVNAFQR		ASTE011462-PA	87	631.812	1262.62	2		44.99	3.98	0
									AIYHTLNmFNVDVSKK	M8(Oxidation)	ASTE011462-PA	3	632.659	1895.96	3	5.26	34.91	-3.08	1
									IIFLNSYK		ASTE011462-PA	29	499.288	997.569	2		41.48	-3.14	0
									EIVKDSVAIPDMPEVIPR		ASTE011462-PA	28	1004.54	2008.07	2	4.73	80.87	-2.76	1
									EIVKDSVAIPDmPEVIPR	M12(Oxidation)	ASTE011462-PA	38	675.361	2024.07	3		38.25	-2.31	1
									cLIGEcWVPVPDLPK	C1(Carbamidomethyl); C6(Carbamidomethyl)	ASTE011462-PA	18	891.949	1782.89	2		25.09	-0.1	0
									EKmPGFER	M3(Oxidation)	ASTE011462-PA	1	337.165	1009.48	3	1.45	21.93	2.33	1
									STNEIWNIFFGGR		ASTE011462-PA	2	770.88	1540.75	2		52.26	-0.43	0
									DLNADINMFQR		ASTE011462-PA	24	668.82	1336.63	2		45.32	1.31	0
									KYTSEIRR		ASTE011462-PA	1	351.533	1052.59	3	2.34	28.37	0.99	2
ASTE002946-PA	55.1	143	143		3697	406.953	7.64	Proboscis,Legs,Brain,Larvae,Fatbody,Head,Malpighian tubules,Maxillary palps,Thorax,Midgut,Testis,Haemolymph,Male accessory glands,Antennaex,Ovary,Pupa,Salivary glands
									NDVNAAIDEK		ASTE002946-PA	7	544.765	1088.52	2	2.16	34.88	1.12	0
									VYLDNEHPFSPTEFLADMQSLGIEPNR		ASTE002946-PA	6	1040.49	3119.47	3	0.84	55.92	-2.9	0
									SFVMNLFSGK		ASTE002946-PA	1	565.29	1129.57	2	2.22	26.6	0.75	0
									TIEALLIK		ASTE002946-PA	26	450.79	900.573	2		34.9	-4.03	0
									IENFGNVQEK		ASTE002946-PA	13	589.296	1177.59	2	2.53	33.61	-0.26	0
									SATSAQSLLVIR		ASTE002946-PA	21	623.361	1245.71	2		41.8	-0.64	0
									MGELVGAR		ASTE002946-PA	6	416.721	832.435	2	2.32	48.2	0.15	0
									cSNTAEVYFEDVKIPIENVLGGEGNGFK	C1(Carbamidomethyl)	ASTE002946-PA	3	1029.5	3086.47	3		22.34	-1.64	1
									EKPEEALAALEQGLK		ASTE002946-PA	15	542.63	1625.88	3	5.94	35.06	0.55	0
									LFVALTGIQYAGSHLK		ASTE002946-PA	160	573.324	1717.96	3	5.36	67.74	-2.79	0
									IWISGGGLADLLTVFAQTEITDPK		ASTE002946-PA	2	1273.18	2545.35	2		77.05	-0.84	0
									FLDENAPSTSESGKDESQR		ASTE002946-PA	5	1048.97	2096.93	2	2.5	108.33	-1.85	1
									FFDGYDPVKAEK		ASTE002946-PA	6	708.349	1415.69	2	2.08	58.55	4.16	1
									IFEGANDVLR		ASTE002946-PA	6	567.301	1133.6	2	1.8	48.21	-0.32	0
									VYAAFALTEPSSGSDAGSIR		ASTE002946-PA	90	999.988	1998.97	2		108.39	-4.25	0
									SIGYGGTDLSSFVADPLKESAALcADSIDR	C24(Carbamidomethyl)	ASTE002946-PA	1	1039.18	3115.52	3	8.67	62.76	10.7	1
									mVLALLEQK	M1(Oxidation)	ASTE002946-PA	1	530.807	1060.61	2	1.8	41.09	0.41	0
									RDLEEVLEEIR		ASTE002946-PA	3	700.873	1400.74	2		33.5	1.06	1
									LLQSYIGEK		ASTE002946-PA	6	525.794	1050.58	2	2.53	36.43	-1.71	0
									QcSEcIDLFGQTVESLLIK	C2(Carbamidomethyl); C5(Carbamidomethyl)	ASTE002946-PA	8	1120.56	2240.11	2		23.32	5.22	0
									VTcLENVNR	C3(Carbamidomethyl)	ASTE002946-PA	2	552.778	1104.55	2	2.83	34.57	2.33	0
									RQAGYNQDAVNVILR		ASTE002946-PA	1	858.963	1716.92	2		73.82	2.37	1
									GIMLYGDER		ASTE002946-PA	19	527.253	1053.5	2		40.59	-3.89	0
									FLDENAPSTSESGK		ASTE002946-PA	1	741.34	1481.67	2	2.31	32.86	-1.93	0
									QAEAPQAAPSEAEKRPNmSFLTNIFR	M18(Oxidation)	ASTE002946-PA	1	730.617	2919.45	4	2.98		1.46	1
									LADSAIDIYAMScVLSR	C13(Carbamidomethyl)	ASTE002946-PA	2	942.965	1884.92	2		77.19	2.13	0
									mGSEMTAEISALLSK	M1(Oxidation)	ASTE002946-PA	2	792.391	1583.77	2	4.79	114.54	5.2	0
									HYVLNGSK		ASTE002946-PA	5	459.245	917.483	2		27.6	-0.56	0
									KLIEFENVQEK		ASTE002946-PA	1	688.874	1376.74	2	4.69	79.02	-1.39	1
									LAISGDVATFER		ASTE002946-PA	11	639.837	1278.67	2		70.62	-1.27	0
									IAVNILNSGR		ASTE002946-PA	4	528.811	1056.62	2	2.96	58.21	-0.52	0
									KINTDSFVK		ASTE002946-PA	13	526.293	1051.58	2	2.31	23.81	-0.45	1
									FGMSGTLAGTMAHcIQK	C14(Carbamidomethyl)	ASTE002946-PA	1	603.952	1809.84	3	5.14	43.81	-1.37	0
									LIADLEAR		ASTE002946-PA	6	450.76	900.513	2	2.29	56.3	-2.4	0
									EVDFVYNSAcWR	C10(Carbamidomethyl)	ASTE002946-PA	1	773.345	1545.68	2	3.95	48.51	2.12	0
									HFPIGGASGILAQHPELHDRYER		ASTE002946-PA	1	650.836	2600.32	4	5.96	35.41	3.71	1
									ENHPSAEHEVLmAK	M12(Oxidation)	ASTE002946-PA	7	536.588	1607.75	3	2.62	40.8	0.62	0
									EmIGSLIDPVTR	M2(Oxidation)	ASTE002946-PA	4	673.852	1346.7	2	1.91	48.14	-1.16	0
									VIAVcNELQEGGmNDR	C5(Carbamidomethyl); M13(Oxidation)	ASTE002946-PA	1	910.918	1820.83	2	4.21	55.16	0.7	0
									ANNPDSILEAYEAVK		ASTE002946-PA	25	817.407	1633.81	2		46.4	0.27	0
									WGLLAPVNALWIHYFISGPAEK		ASTE002946-PA	1	828.117	2482.34	3		39.84	3.52	0
									MVLALLEQK		ASTE002946-PA	11	522.811	1044.61	2		52.45	1.63	0
									KLEEAIEK		ASTE002946-PA	1	480.275	959.542	2	2.65	50.28	0.99	1
									IWISNGGIADIMTVFAQTELEDPKTGQK		ASTE002946-PA	7	1021.53	3062.57	3		52.97	4.84	1
									MGSEMTAEISALLSK		ASTE002946-PA	4	784.392	1567.78	2	2.39	122.59	3.72	0
									ESAALcADSIDR	C6(Carbamidomethyl)	ASTE002946-PA	6	654.3	1307.59	2	3.23	19.41	1.66	0
									NYGVmSQISK	M5(Oxidation)	ASTE002946-PA	15	571.779	1142.55	2	1.38	29.93	-0.32	0
									VIAVcNELQEGGMNDR	C5(Carbamidomethyl)	ASTE002946-PA	3	902.921	1804.83	2	2.98	15.8	1.4	0
									GNVQQVNQLFEHLQGK		ASTE002946-PA	5	613.654	1838.95	3		30.65	-1.76	0
									LLQSYIGEKDAVK		ASTE002946-PA	2	488.61	1463.81	3	2.98	17.91	2.74	1
									DLGDFLK		ASTE002946-PA	8	404.216	807.424	2	1.82	44.7	-1.07	0
									KGDIDYIcK	C8(Carbamidomethyl)	ASTE002946-PA	1	556.276	1111.55	2	2.67	52.84	-0.16	1
									LISFDNR		ASTE002946-PA	4	432.733	864.459	2	1.6	46.65	1.5	0
									mGSEmTAEISALLSK	M1(Oxidation); M5(Oxidation)	ASTE002946-PA	1	800.386	1599.77	2	5.54	124.39	2.6	0
									TLQNLNVAMDVSHYNALLR		ASTE002946-PA	7	724.714	2172.13	3	3.13	76.08	2.5	0
									AYYSPGVYR		ASTE002946-PA	10	538.265	1075.52	2		64.34	1.99	0
									AVTSSVPDAK		ASTE002946-PA	1	487.76	974.514	2	2.03	67.82	-1.67	0
									LAEHYAK		ASTE002946-PA	1	416.221	831.435	2	1.41	29.37	-0.87	0
									MSAFIVER		ASTE002946-PA	1	476.748	952.49	2	2.2	53.66	-2.64	0
									MFIALTGMQK		ASTE002946-PA	2	570.299	1139.59	2	2.11	39.28	-3.18	0
									LAAGDLEPIELDR		ASTE002946-PA	20	706.375	1411.74	2	1.9	81.85	0.28	0
									LIEFENVQEK		ASTE002946-PA	1	624.827	1248.65	2	2.29	50	-0.16	0
									QGVVQSNPVR		ASTE002946-PA	5	542.299	1083.59	2	1.41		0.38	0
									VEVMQQILTGFVAQGLSISNNMAEK		ASTE002946-PA	1	903.133	2707.38	3		79.25	1.83	0
									SNGYEVPFAIPVPEATEEK		ASTE002946-PA	1	1039.01	2077.01	2	2.59	29.81	-1.07	0
									GImLYGDER	M3(Oxidation)	ASTE002946-PA	5	535.252	1069.5	2	2.15	42.82	-2.04	0
									NPATNMGLIFK		ASTE002946-PA	15	603.319	1205.63	2		54.46	-3.91	0
									NYDTMSAIAK		ASTE002946-PA	8	557.267	1113.53	2	1.67	48.95	2.24	0
									AFKNPATNmGLIFK	M9(Oxidation)	ASTE002946-PA	10	523.282	1567.83	3	4.98	43.73	1.23	1
									KIETFGGVQEKLAR		ASTE002946-PA	1	525.967	1575.88	3	4.29	101.9	-0.19	2
									AcIQKAAEHATNR	C2(Carbamidomethyl)	ASTE002946-PA	3	490.581	1469.73	3	4.42	62.75	0.22	1
									QAGYNQDAVNVILR		ASTE002946-PA	14	780.911	1560.82	2	5.02	96.32	1.55	0
									VAMNILNNGR		ASTE002946-PA	10	551.294	1101.58	2		52.93	-2.97	0
									SAPAATVNTSFMANLFR		ASTE002946-PA	13	899.452	1797.9	2	1.26	110.42	0.94	0
									LADAAIDTYAmAVVLSR	M11(Oxidation)	ASTE002946-PA	7	898.468	1795.93	2	3.27	122.17	1.49	0
									IFEGANDILR		ASTE002946-PA	41	574.309	1147.61	2		19.19	0.62	0
									IGSLLSDDLK		ASTE002946-PA	5	530.798	1060.59	2	2.02	74.71	-0.66	0
									AWcVEANDRVR	C3(Carbamidomethyl)	ASTE002946-PA	2	459.223	1375.66	3	2.2	28.01	1.39	1
									IGSLLSDDLKR		ASTE002946-PA	17	406.235	1216.69	3		45.33	1.75	1
									ENHPSAEHEVLMAK		ASTE002946-PA	7	796.382	1591.76	2	4.11	62.88	2.19	0
									ASKNDGELANTGSFLVR		ASTE002946-PA	2	889.958	1778.91	2		82.07	2.82	1
									TTSAKPNLTEQSAVIEALVNR		ASTE002946-PA	12	748.073	2242.21	3		47.36	0.92	0
									FFDGYDPVK		ASTE002946-PA	27	544.257	1087.51	2		46.43	-3.33	0
									SIGYGGTDLSTYVADPLKQSAK		ASTE002946-PA	12	757.723	2271.16	3		63.06	2.29	1
									MQEENVTPSDAFLR		ASTE002946-PA	8	818.884	1636.76	2	4.12	67.83	-1.51	0
									IETFGGVQEK		ASTE002946-PA	7	554.286	1107.56	2		38.37	-3.49	0
									INTDSFVKNYGVMSQISK		ASTE002946-PA	1	677.678	2031.02	3	2.21	13.86	-1.2	1
									VPVENLLGEIGGGFK		ASTE002946-PA	8	764.923	1528.84	2	2.83	66.74	1.29	0
									SFGGVSTGPPEDK		ASTE002946-PA	1	639.306	1277.6	2	1.91	19.33	2.76	0
									VFGAFALTEPGTGSDAASVK		ASTE002946-PA	2	962.987	1924.97	2	3.01	36.74	1.18	0
									GVLLYGTEEQK		ASTE002946-PA	12	618.827	1236.65	2	1.9	59.1	-0.65	0
									LAQcLLDGERFDEALR	C4(Carbamidomethyl)	ASTE002946-PA	5	635.988	1905.95	3	3.88	22.15	0.96	1
									TSSLEGLMEATK		ASTE002946-PA	6	633.819	1266.63	2	1.79	60.65	4.06	0
									GFEGVSTGPPEDK		ASTE002946-PA	2	660.311	1319.61	2	2.44	32.43	1.79	0
									SLGLWTR		ASTE002946-PA	7	416.738	832.469	2	1.99	47.29	1.88	0
									NPATNmGLIFK	M6(Oxidation)	ASTE002946-PA	7	611.318	1221.63	2	1.7	42.24	-0.8	0
									DAKDDALcQR	C8(Carbamidomethyl)	ASTE002946-PA	2	596.274	1191.54	2	2.23	21.2	-0.55	1
									ANTIWNR		ASTE002946-PA	3	437.73	874.454	2	1.46	32.03	0.74	0
									ccGNLVPEELPEVR	C1(Carbamidomethyl); C2(Carbamidomethyl)	ASTE002946-PA	1	836.394	1671.78	2	4.31	81.85	-1.45	0
									FNLYPSSETVR		ASTE002946-PA	17	656.832	1312.66	2		60.74	2.43	0
									VAmNILNNGR	M3(Oxidation)	ASTE002946-PA	4	559.293	1117.58	2		20.55	1.07	0
									NDGELANTGSFLVR		ASTE002946-PA	10	746.877	1492.75	2	4.44	83.98	5.19	0
									cSNTAEVYFEDVK	C1(Carbamidomethyl)	ASTE002946-PA	3	781.346	1561.68	2	2.26	64.9	0.35	0
									AFKNPTANLGLIFK		ASTE002946-PA	18	767.444	1533.88	2	2.74	48.94	0.62	1
									VEEAFELLK		ASTE002946-PA	2	539.295	1077.58	2	2.66	47.43	0.32	0
									GHVEPAQVFPYPEALDAEQKEYIASFVDPVTK		ASTE002946-PA	50	1192.27	3574.79	3	3.56	23.63	4.02	1
									IWISNGGIADIMTVFAQTELEDPK		ASTE002946-PA	5	883.445	2648.32	3		69.89	-2.76	0
									IPAENVLGGEGNGFK		ASTE002946-PA	23	751.388	1501.77	2	4.43	83.27	3.3	0
									LADAAIDTYAMAVVLSR		ASTE002946-PA	57	890.468	1779.93	2		49.61	-1.15	0
									FYQEVNDAAR		ASTE002946-PA	1	606.786	1212.56	2	1.1	13.96	-0.14	0
									cSNTAEVYFDDVR	C1(Carbamidomethyl)	ASTE002946-PA	3	788.339	1575.67	2	3.13	85.38	-1.99	0
									NYGVMSQISK		ASTE002946-PA	15	563.78	1126.55	2		36.14	-2.67	0
									VTAFIVER		ASTE002946-PA	25	467.77	934.533	2		52.4	-2.74	0
									SIGYGGTDLSSFVADPLK		ASTE002946-PA	16	913.962	1826.92	2		94.16	-0.73	0
									AHLIALETALK		ASTE002946-PA	10	590.36	1179.71	2		57.32	2.9	0
									KPLVQALLQSR		ASTE002946-PA	15	418.263	1252.78	3		47.34	1.3	0
									AFKNPATNMGLIFK		ASTE002946-PA	5	776.424	1551.84	2		53.83	3.6	1
									mQEENVTPSDAFLR	M1(Oxidation)	ASTE002946-PA	7	826.883	1652.76	2	1.69	46.74	0.54	0
									FGLGAMLSGTMK		ASTE002946-PA	1	606.818	1212.63	2	2.19	61.43	13.29	0
									VQVSGPmR	M7(Oxidation)	ASTE002946-PA	1	445.232	889.456	2	1.48	13.73	-0.3	0
									TTEALWELGAFSLMVPPEYGGLGLNNTQYSR		ASTE002946-PA	1	1707.84	3414.67	2		80.51	-0.24	0
									LAQcLLDGER	C4(Carbamidomethyl)	ASTE002946-PA	1	587.797	1174.59	2	2.76	64.81	-0.83	0
									GHVEPAQVFPYPEALDAEQK		ASTE002946-PA	59	1113.04	2225.08	2	4.79	50.07	-3.39	0
									QAEAPQAAPSEAEK		ASTE002946-PA	12	713.844	1426.68	2	2.08	58.21	0.01	0
									NPTANLGLIFK		ASTE002946-PA	25	594.343	1187.68	2	3.89	76.04	-0.37	0
									DLSHIDRSEIYHK		ASTE002946-PA	1	538.275	1612.81	3	3.81		1.09	1
									LIDHLHESNVSEK		ASTE002946-PA	14	380.948	1520.77	4	4.33	25.59	0.48	0
									SIGYGGTDLSTYVADPLK		ASTE002946-PA	126	928.966	1856.92	2	4.93	139.53	-1.47	0
									RLQEALAAK		ASTE002946-PA	1	500.3	999.592	2		55.6	-2.65	1
									LFVTLTGIQYAGSHLK		ASTE002946-PA	34	583.329	1747.97	3	5.77	44.71	-1.24	0
									KIVDEQFLLNR		ASTE002946-PA	30	687.89	1374.77	2		80.27	-1.56	1
									NYDTmSAIAK	M5(Oxidation)	ASTE002946-PA	2	565.264	1129.52	2	1.28	41.66	0.98	0
									MFIALTGIR		ASTE002946-PA	1	511.296	1021.59	2	2.29	53.97	-1.74	0
									LcHANVSNGNADQYLR	C2(Carbamidomethyl)	ASTE002946-PA	1	916.432	1831.86	2	2.04	18.86	2.89	0
									HFPIGGASGILAQHPELHDR		ASTE002946-PA	4	538.781	2152.1	4	1.92	43.77	-0.28	0
									LLNTLAEK		ASTE002946-PA	3	451.27	901.533	2	2.03	57.3	-2.26	0
									EMIGSLIDPVTR		ASTE002946-PA	11	665.856	1330.7	2	1.83	62.74	0.51	0
									DYAVPNLPVNNNEIVIQLLR		ASTE002946-PA	31	1147.63	2294.25	2		43.5	-0.69	0
									NNLKEAANIATR		ASTE002946-PA	2	657.861	1314.72	2	3.13	58.04	2.38	1
									KDKVTAFIVER		ASTE002946-PA	6	435.923	1305.75	3		52.15	1.37	2
									FFEEVNDPVK		ASTE002946-PA	13	612.299	1223.59	2		64.53	-3.24	0
									GFGGVSNGPPENK		ASTE002946-PA	22	630.304	1259.6	2	2.61	99.49	-1.12	0
									IPIENVLGGEGNGFK		ASTE002946-PA	16	772.408	1543.81	2		107.68	-1.74	0
ASTE005189-PA	1.53	2	2	2	1500	165.871	5.59	Midgut,Salivary glands
									NAFDLLNLNR		ASTE005189-PA	1	595.319	1189.63	2	1.05	33.85	-0.68	0
									IISPScDEPQVLR	C6(Carbamidomethyl)	ASTE005189-PA	1	757.386	1513.77	2	2.78	58.33	-2.01	0
ASTE001620-PA	45.79	14	14	32	439	51.066	6.18	Fatbody,Malpighian tubules,Thorax,Midgut,Brain,Antennaex,Salivary glands
									IFFESYDMIFR		ASTE001620-PA	2	734.353	1467.7	2		67.87	0.44	0
									TLcEILR	C3(Carbamidomethyl)	ASTE001620-PA	2	452.75	904.494	2		40.92	1.56	0
									LFLYVDEFPAELDSER		ASTE001620-PA	1	971.973	1942.94	2		88.75	-1.93	0
									ANGEDSTVPLLVK		ASTE001620-PA	1	671.863	1342.72	2	2.85	73.62	-1.71	0
									DPIYSVILHGDYNR		ASTE001620-PA	1	831.419	1661.83	2	2.63	27.44	1.28	0
									cTLTVGGNEVNR	C1(Carbamidomethyl)	ASTE001620-PA	1	660.322	1319.64	2	2.6	34.26	-1.04	0
									TQNLGHVLFPNEINIYANVLPYFDSLLAASGSPLK		ASTE001620-PA	1	1272.67	3816.01	3		54.63	2.75	0
									IIPLNFLQDGK		ASTE001620-PA	5	629.364	1257.72	2		45.33	0.82	0
									HASQMGYMDVM		ASTE001620-PA	1	635.258	1269.51	2		49.24	1.83	0
									ATDWcPR	C5(Carbamidomethyl)	ASTE001620-PA	2	453.2	905.394	2	2.01	47.61	0.23	0
									YHAcSYALR	C4(Carbamidomethyl)	ASTE001620-PA	1	570.768	1140.53	2		40.03	3.26	0
									IQNPDKLDALVQK		ASTE001620-PA	6	494.616	1481.83	3		36.48	1.45	1
									GMEVVGcTLQTPK	C7(Carbamidomethyl)	ASTE001620-PA	4	710.352	1419.7	2	2.5	33.3	-0.38	0
									LEAYSEPNFR		ASTE001620-PA	4	613.298	1225.59	2		50.21	3.04	0
ASTE005939-PA	45.49	23	23	80	699	79.111	7.14	Legs,Fatbody,Maxillary palps,Midgut,Brain,Haemolymph,Male accessory glands,Salivary glands
									EFEVmAYPTIR	M5(Oxidation)	ASTE005939-PA	2	686.334	1371.66	2	2.05	58.14	0.04	0
									IWQVATK		ASTE005939-PA	2	423.247	845.488	2	1.47	28.81	-0.48	0
									DDAVLWLWSSHNEVNKR		ASTE005939-PA	2	690.345	2069.02	3		50.38	0.08	1
									LSGDATEDPEHPK		ASTE005939-PA	9	465.885	1395.64	3	3.94	43.75	0.2	0
									IGEPVKEHDEQR		ASTE005939-PA	1	479.576	1436.71	3	2.29	33.27	0.23	1
									SLETERKPVFSSNHWIGcSGSR	C18(Carbamidomethyl)	ASTE005939-PA	1	634.31	2534.22	4	2.52		-1.15	1
									LDGEAFVAR		ASTE005939-PA	4	489.256	977.505	2	2.4	72.73	0.11	0
									EFEVMAYPTIR		ASTE005939-PA	2	678.337	1355.67	2	1.04	48.65	0.7	0
									VTALDcSR	C6(Carbamidomethyl)	ASTE005939-PA	1	461.226	921.445	2	2.01	42.94	-0.77	0
									VTALDcSRDENNAVcR	C6(Carbamidomethyl); C15(Carbamidomethyl)	ASTE005939-PA	3	627.283	1879.84	3	1.79	17.1	-1.7	1
									LSGDATEDPEHPKVQFPTANDcAQcR	C22(Carbamidomethyl); C25(Carbamidomethyl)	ASTE005939-PA	1	736.58	2943.3	4	2.48	20.27	0.07	1
									FFSPYYADGEQK		ASTE005939-PA	12	726.328	1451.65	2	1.74	29.07	0.13	0
									VFNQPHASLVEFYNSYcGFcR	C17(Carbamidomethyl); C20(Carbamidomethyl)	ASTE005939-PA	1	865.724	2595.16	3		62.16	1.58	0
									ELGAAVVYQADLEEAIR		ASTE005939-PA	1	923.983	1846.96	2		54.64	2.2	0
									TDDKASLFDGTSAVGAPRPK		ASTE005939-PA	3	678.349	2033.03	3	7.51	60.69	1.42	1
									NFLNVLVR		ASTE005939-PA	11	487.793	974.578	2	2.23	45.95	0.26	0
									KPVFSSNHWIGcSGSR	C12(Carbamidomethyl)	ASTE005939-PA	3	606.962	1818.87	3	3.96	31.61	1.09	0
									QLATDILGWQK		ASTE005939-PA	3	636.853	1272.7	2	3.54	61.4	2.42	0
									FALFHEIGR		ASTE005939-PA	10	545.295	1089.58	2	1.84	26.76	-1.69	0
									QYVLNAGEER		ASTE005939-PA	1	589.785	1178.56	2		77.48	-14.35	0
									YVYLINEK		ASTE005939-PA	2	521.285	1041.56	2		42.23	1.67	0
									VQFPTANDcAQcR	C9(Carbamidomethyl); C12(Carbamidomethyl)	ASTE005939-PA	4	783.844	1566.68	2	3.38	77.82	1.66	0
									mHDPTLTTNGLSVVDGSSLSAINLPIDEFSR	M1(Oxidation)	ASTE005939-PA	1	1101.54	3302.62	3	5.43	95.25	-0.92	0
ASTE003368-PA	45.8	12	12	47	262	29.584	5.27	Proboscis,Fatbody,Midgut,Brain,Male accessory glands,Antennaex,Ovary,Salivary glands,Malpighian tubules
									LLIQQLEQEERETEALDATKK		ASTE003368-PA	7	829.1	2485.28	3	5.62	33.5	-11.88	2
									LLIQQLEQEER		ASTE003368-PA	8	699.885	1398.76	2	1.21	82.18	2.13	0
									FmASEDQSAQR	M2(Oxidation)	ASTE003368-PA	6	643.277	1285.55	2	3.21	65.16	-0.97	0
									TDPIDFPPDEPVTSENLR		ASTE003368-PA	1	1021.49	2041.97	2	3.57	49.33	-0.25	0
									NTDVYIGLPGcVPK	C11(Carbamidomethyl)	ASTE003368-PA	6	766.892	1532.78	2		59.98	-0.11	0
									FMASEDQSAQR		ASTE003368-PA	7	635.283	1269.56	2	2.37	82.66	4.05	0
									SFEVLNGALNTERTEL		ASTE003368-PA	2	896.942	1792.88	2		43.11	-17.03	1
									KIVSANQPPRDVVSEER		ASTE003368-PA	3	642.013	1924.02	3	2.23	22.34	-0.45	2
									SFEVLNGALNTER		ASTE003368-PA	1	725.372	1449.74	2	2.89	104.5	2.79	0
									SYPMYISLMR		ASTE003368-PA	1	630.808	1260.61	2	1.18	19.04	-2.67	0
									LLIQQLEQEERETEALDATK		ASTE003368-PA	2	786.412	2357.22	3	4.37	46.12	0.78	1
									GcVDLDSSTFDKVTGK	C2(Carbamidomethyl)	ASTE003368-PA	3	864.91	1728.81	2	4.38	88.24	0.49	1
ASTE010142-PA	23.08	10	10	23	455	51.148	5.27	Proboscis,Fatbody,Maxillary palps,Thorax,Haemolymph,Male accessory glands,Antennaex
									AEGPFTVLMR		ASTE010142-PA	1	560.795	1120.58	2		56.53	1.15	0
									AEGPFTVLmR	M9(Oxidation)	ASTE010142-PA	3	568.793	1136.58	2	2.13	42.66	1.53	0
									QSFSFAK		ASTE010142-PA	1	407.708	814.409	2		36.96	-0.83	0
									AQFTVEHIR		ASTE010142-PA	5	550.796	1100.58	2		63.37	-0.55	0
									LKDIQLELGNIQVR		ASTE010142-PA	1	819.981	1638.95	2		68.27	0.73	1
									VEFQVEQPLDLRK		ASTE010142-PA	4	534.289	1600.85	3	3.8	32.1	-11.17	1
									IVGSTQWEVSIGR		ASTE010142-PA	1	716.384	1431.76	2		83.45	0.65	0
									IQEKLDcIDTEALVR	C7(Carbamidomethyl)	ASTE010142-PA	1	601.649	1802.93	3		64.66	0.36	1
									LDcIDTEALVR	C3(Carbamidomethyl)	ASTE010142-PA	5	652.822	1304.64	2	2.18	58.62	-11.89	0
									VEFQVEQPLDLR		ASTE010142-PA	1	736.89	1472.77	2		55.44	-1.06	0
ASTE003681-PA	84.11	7	7	229	107	12.581	10.08	Proboscis,Legs,Brain,Larvae,Fatbody,Head,Malpighian tubules,Maxillary palps,Thorax,Midgut,Testis,Male accessory glands,Antennaex,Ovary,Pupa,Salivary glands
									aIGDYPAEYNPK	N-Term(Acetyl)	ASTE003681-PA	5	690.328	1379.65	2		23.25	0.84	0
									TGIAPFFQVIVGGMVFFYTINYGK		ASTE003681-PA	1	1335.19	2669.38	2		33.94	-0.42	0
									VHGPYDPARFYGKPDTPFGQVK		ASTE003681-PA	1	826.087	2476.25	3	1.46		1.91	1
									AIGDYPAEYNPKVHGPYDPAR		ASTE003681-PA	7	583.286	2330.12	4		42.76	1.01	1
									WQHKYmQPK	M6(Oxidation)	ASTE003681-PA	2	421.21	1261.61	3	1.65		-0.57	1
									AIGDYPAEYNPK		ASTE003681-PA	209	669.324	1337.64	2		30.65	1.92	0
									WQHKYMQPK		ASTE003681-PA	4	415.879	1245.62	3	3.64	21.94	1.12	1
ASTE003525-PA	6.92	13	13		2354	257.58	6.13	Brain,Larvae,Fatbody,Salivary glands
									TAGIGSPHLHR		ASTE003525-PA	1	382.544	1145.62	3	2.83	17	-0.08	0
									DPEQPHYIGR		ASTE003525-PA	2	404.532	1211.58	3	2.71	31.75	1.05	0
									YAYDPTR		ASTE003525-PA	1	443.209	885.41	2	1.73	32.42	-0.25	0
									TNLPAPNTVGHQR		ASTE003525-PA	1	468.916	1404.73	3	3.94	48.09	-0.11	0
									VGPGGAGQLALNAEcLANVLATLLR	C15(Carbamidomethyl)	ASTE003525-PA	1	826.787	2478.35	3	6.32	88.08	-1.31	0
									ITELAQDLTR		ASTE003525-PA	1	580.317	1159.63	2	2.44	60.92	-4.23	0
									ESALLVPELGPR		ASTE003525-PA	1	640.863	1280.72	2	2.47		-1.3	0
									VLLVSPR		ASTE003525-PA	1	392.258	783.508	2	1.2	43.42	-0.58	0
									DELTDQALQLVTASK		ASTE003525-PA	1	816.429	1631.85	2	4.14	96.44	1.69	0
									LLSNPPLYHR		ASTE003525-PA	1	403.897	1209.67	3		32.66	1.28	0
									FGLSQIAGVR		ASTE003525-PA	2	524.302	1047.6	2	1.73	65.84	1.79	0
									APVNNPLFVSTK		ASTE003525-PA	1	643.858	1286.71	2	2.19	26.65	-1.14	0
									LTLLDPQETVAR		ASTE003525-PA	1	678.381	1355.75	2	1.48	35.18	1.08	0
ASTE011268-PA	33.48	18	18	33	693	79.349	9.51	Fatbody,Midgut,Male accessory glands,Ovary,Pupa,Salivary glands
									TAEESAEKYDETKDHDIER		ASTE011268-PA	1	567.261	2266.02	4	2.67		5.91	2
									EWTDHIDFLEQIAR		ASTE011268-PA	1	591.631	1772.88	3	2.87	34.84	10.51	0
									VVDSADVLLQVLDAR		ASTE011268-PA	4	538.302	1612.89	3	1.92	69.57	0.33	0
									EYIFAAGQSK		ASTE011268-PA	2	557.276	1113.54	2	1.32		-11.73	0
									IFLIDcPGVVYPTAETDTEK	C6(Carbamidomethyl)	ASTE011268-PA	4	1134.56	2268.11	2	1.54	23.08	-0.49	0
									VWQYITLMK		ASTE011268-PA	1	591.328	1181.65	2	2.11	41.48	8.94	0
									GRLPFYVAPEGFEIPK		ASTE011268-PA	2	607.334	1819.99	3	3.28	33.6	7.14	1
									VIMKPTNLPITLLNESAR		ASTE011268-PA	1	670.725	2010.16	3	2.48	16.49	9.56	0
									VDLVPIWVTQR		ASTE011268-PA	1	663.389	1325.77	2	2.54	65.64	9.54	0
									VHLLDTESYETVFGK		ASTE011268-PA	2	579.966	1737.88	3	3.79	46.66	7.53	0
									STYSGVTATPTIPDTVK		ASTE011268-PA	1	869.455	1737.9	2	3.4	40.74	7.22	0
									DLEDLTK		ASTE011268-PA	1	417.217	833.427	2	1.96	45.91	1.72	0
									MILNDWQR		ASTE011268-PA	1	538.272	1075.54	2	2.25	34.9	0.63	0
									ILTPAPFQGWVSSGTVAR		ASTE011268-PA	3	944.015	1887.02	2	2.38	54.83	5.23	0
									VELVNNPEDYIEEVLKR		ASTE011268-PA	3	687.029	2059.07	3	1.5	72	0.92	1
									LPFYVAPEGFEIPK		ASTE011268-PA	3	803.932	1606.86	2	3.27	31.31	3.56	0
									TAEESAEKYDETK		ASTE011268-PA	1	750.838	1500.67	2	4.11	84.69	-1.13	1
									QISVGFIGYPNVGK		ASTE011268-PA	1	739.911	1478.82	2	2.86	76.3	10.13	0
ASTE008578-PA	8.42	1	1	1	202	21.487	9.69	Midgut
									AAAEPcTAMSSSIATLR	C6(Carbamidomethyl)	ASTE008578-PA	1	868.916	1736.83	2	4.19	64.08	-3.2	0
ASTE003319-PA	46.05	12	12	37	380	42.056	6.16	Proboscis,Legs,Fatbody,Maxillary palps,Midgut,Brain,Male accessory glands,Antennaex,Salivary glands,Testis,Malpighian tubules
									LFETTFK		ASTE003319-PA	1	443.24	885.472	2	1.94	35.49	0.88	0
									DVFVDYQR		ASTE003319-PA	1	521.253	1041.5	2	1.85	26.37	-2.2	0
									NSIDVLQGGKR		ASTE003319-PA	3	593.831	1186.65	2	3.34	53.52	1.08	1
									LLLEGLGLDPDLSQLDDDEER		ASTE003319-PA	3	1178.09	2355.16	2		75.72	2.79	0
									GENIIDGGAHFYDTYETK		ASTE003319-PA	4	677.308	2029.91	3	1.35	16.38	-1.83	0
									SQTLPIWGNPR		ASTE003319-PA	8	634.841	1268.67	2	2.89	28.03	0.35	0
									AGHDLNYVALSGVLSMLGR		ASTE003319-PA	1	658.35	1973.03	3	6.62	55.84	3.39	0
									DAcVFPVLTPDEVESYQHNR	C3(Carbamidomethyl)	ASTE003319-PA	1	792.701	2376.09	3	2.83	12.95	-1.14	0
									LTGFGQTGTHAVR		ASTE003319-PA	3	448.904	1344.7	3	3.01	47.81	-2.47	0
									KEDEVLVPTPAPK		ASTE003319-PA	3	711.896	1422.78	2	2.67	73.36	-0.06	1
									LYEEGVLLLSNKPK		ASTE003319-PA	3	534.975	1602.91	3	4.21	30.62	-0.46	0
									FLSVGAIENK		ASTE003319-PA	6	539.302	1077.6	2		64.16	2.02	0
ASTE006812-PA	66.8	22	22		244	27.449	9.16	Proboscis,Legs,Fatbody,Maxillary palps,Midgut,Brain,Male accessory glands,Antennaex,Ovary,Pupa,Salivary glands,Testis,Malpighian tubules
									TFLFTHLcLGGGR	C8(Carbamidomethyl)	ASTE006812-PA	1	493.595	1478.77	3	3.91	34.79	9.05	0
									SAGVDFEFEQLGQR		ASTE006812-PA	16	791.88	1582.75	2		73.94	2.15	0
									DVADFLYTILADK		ASTE006812-PA	11	742.389	1483.77	2	1.96	91.02	1.76	0
									SMLEKEINIVR		ASTE006812-PA	2	444.583	1331.74	3	3.44	46.42	0.33	1
									IPVVVLcNKQDETLAK	C7(Carbamidomethyl)	ASTE006812-PA	3	609.672	1827	3		18.23	-1.49	1
									AIVYmIDSVTVQK	M5(Oxidation)	ASTE006812-PA	1	741.897	1482.79	2	2.69	40.39	-0.18	0
									DVADFLYTILADKATTK		ASTE006812-PA	2	629.006	1885	3	3.93	55.52	3.75	1
									ETFTSIKENVGSFK		ASTE006812-PA	3	793.909	1586.81	2		34.58	3.12	1
									IPVVVLcNK	C7(Carbamidomethyl)	ASTE006812-PA	13	521.312	1041.62	2		46.91	4.72	0
									DIRDVADFLYTILADKATTK		ASTE006812-PA	4	568.058	2269.21	4	3.17	24.83	0.91	2
									ETFTSIK		ASTE006812-PA	1	413.221	825.435	2	1.17	42.5	-0.45	0
									GKFFDEYKNIAK		ASTE006812-PA	1	487.258	1459.76	3	3.07	31.62	0.51	2
									MVDVPGHER		ASTE006812-PA	8	520.255	1039.5	2	1.72	46.58	2.89	0
									DIRDVADFLYTILADK		ASTE006812-PA	4	934.495	1867.98	2	4.65	57.31	1.73	1
									GKFFDEYK		ASTE006812-PA	1	517.253	1033.5	2	2.3	16.24	-0.84	1
									mVDVPGHER	M1(Oxidation)	ASTE006812-PA	6	352.504	1055.5	3	2.57	44.53	2.64	0
									FVPcSTK	C4(Carbamidomethyl)	ASTE006812-PA	2	419.71	838.413	2	1.46	26.47	0.56	0
									FFDEYKNIAK		ASTE006812-PA	1	637.825	1274.64	2	2.34	43.53	0.32	1
									SAVLFTGLcDSGK	C9(Carbamidomethyl)	ASTE006812-PA	6	677.837	1354.67	2		41.49	-0.57	0
									LQSVDNSTSSESFLGK		ASTE006812-PA	27	849.917	1698.83	2		79.62	4.61	0
									SKLQSVDNSTSSESFLGK		ASTE006812-PA	4	957.479	1913.95	2	3.08	69.36	2.53	1
									FVPcSTKEEK	C4(Carbamidomethyl)	ASTE006812-PA	7	408.869	1224.59	3	2.33	25.02	0.75	1
ASTE002428-PA	8.16	2	2	6	429	47.548	9.6	Brain,Salivary glands
									KLTQSISQSSIDSGHSSASK		ASTE002428-PA	2	683.348	2048.03	3	6.87	88.32	1.77	1
									ADGTLDPYHAAILFR		ASTE002428-PA	4	553.956	1659.85	3	1.73	62.86	3	0
ASTE006711-PA	64.24	17	17	110	288	29.889	5.97	Proboscis,Legs,Brain,Larvae,Fatbody,Head,Malpighian tubules,Maxillary palps,Thorax,Midgut,Testis,Male accessory glands,Antennaex,Ovary,Pupa,Salivary glands
									HAGDmGNIVADASGEAKVDLVASQIALSGPmNVVGR	M5(Oxidation); M31(Oxidation)	ASTE006711-PA	1	896.196	3581.76	4	0.82	11.06	-1.82	1
									PLKAVcVLNGEVK	C6(Carbamidomethyl)	ASTE006711-PA	10	476.276	1426.81	3		78.25	2.67	1
									TLSITEFEDDLGR		ASTE006711-PA	5	748.369	1495.73	2		94.77	2.39	0
									AGDHGFHIHEFGDNTNGcMSTGAHFNPHGK	C18(Carbamidomethyl)	ASTE006711-PA	3	650.682	3249.38	5	5.51	36.3	1.59	0
									TTGNSGNcIAcAIIGVAR	C8(Carbamidomethyl); C11(Carbamidomethyl)	ASTE006711-PA	1	917.946	1834.88	2		147.47	-2.65	0
									VTGSVTGLK		ASTE006711-PA	30	431.258	861.509	2		52.39	5.55	0
									HGFHIHEFGDFSR		ASTE006711-PA	2	793.371	1585.73	2		67.12	3.54	0
									THGAPDADERHAGDmGNIVADASGEAK	M15(Oxidation)	ASTE006711-PA	5	903.405	2708.2	3	5.08	54.74	1.02	1
									HAGDmGNIVADASGEAKVDLVASQIALSGPMNVVGR	M5(Oxidation)	ASTE006711-PA	4	892.198	3565.77	4	2.82	26.98	-0.52	1
									THGAPDADERHAGDmGNIVADASGEAKVDLVASQIALSGPMNVVGR	M15(Oxidation)	ASTE006711-PA	1	770.043	4615.22	6	1.42		-0.57	2
									THGAPDADER		ASTE006711-PA	4	534.739	1068.47	2	2.14	50.35	-0.37	0
									THGAPDADERHAGDMGNIVADASGEAK		ASTE006711-PA	6	898.071	2692.2	3	4.65	31.47	-1.52	1
									HAGDMGNIVADASGEAKVDLVASQIALSGPMNVVGR		ASTE006711-PA	3	888.199	3549.78	4	1.89	23.84	-1.06	1
									TTGNAGAR		ASTE006711-PA	1	374.191	747.374	2	2.37	39.06	-0.24	0
									AVcVLNGEVK	C3(Carbamidomethyl)	ASTE006711-PA	30	544.795	1088.58	2	2.3	29.22	6.2	0
									AGDHGFHIHEFGDNTNGcmSTGAHFNPHGK	C18(Carbamidomethyl); M19(Oxidation)	ASTE006711-PA	3	817.101	3265.38	4	6.67	24.16	2.76	0
									HAGDMGNIVADASGEAKVDLVASQIALSGPmNVVGR	M31(Oxidation)	ASTE006711-PA	1	892.198	3565.77	4	1.93	17.67	-1.06	1
ASTE000031-PA	17.68	4	4	7	198	20.481	4.53	Brain
									GEISAELLQK		ASTE000031-PA	3	544.305	1087.6	2	2.38	30.41	3.58	0
									ELESmQPTSGTVSVVANR	M5(Oxidation)	ASTE000031-PA	1	960.973	1920.94	2	3.89	80.29	2.38	0
									NLHYAAR		ASTE000031-PA	1	422.724	844.441	2	1.32		-2.17	0
									ELESMQPTSGTVSVVANR		ASTE000031-PA	2	952.977	1904.95	2	2.5	37.09	4.34	0
ASTE000527-PA	8.02	1	1	6	212	23.399	8.34	Proboscis,Legs,Larvae,Head,Maxillary palps,Midgut,Brain,Antennaex,Salivary glands
									VPQIQTVR		ASTE000527-PA	6	470.783	940.558	2		55.26	0.32	0
ASTE003612-PA	54.81	9	9	14	239	28.005	8.48	Fatbody,Midgut,Brain,Ovary
									FMAIFTR		ASTE003612-PA	1	443.235	885.463	2	1.88	40.28	-1.97	0
									IINSTLLSEYAYVLRPGGQIYTVTDVR		ASTE003612-PA	2	1014.55	3041.64	3	1.82		3.41	0
									LFFLYPDPHFKK		ASTE003612-PA	1	517.95	1551.84	3	3.34	34.46	-0.39	1
									YENIAcIR	C6(Carbamidomethyl)	ASTE003612-PA	1	519.757	1038.51	2	2.3	46.05	3.04	0
									YLPNYFR		ASTE003612-PA	1	486.75	972.492	2	1.12	43	-1.73	0
									LFFLYPDPHFK		ASTE003612-PA	1	475.251	1423.74	3	2.29	38.04	-0.96	0
									HIEEHPcFR	C7(Carbamidomethyl)	ASTE003612-PA	1	408.857	1224.56	3	3.52	42.05	-1.12	0
									AHSNPIADHSFEYPARPDLSNWNDLYPNVGDR		ASTE003612-PA	1	917.682	3667.7	4	5.04	14.25	2.58	0
									RLPDGEAQQDILAPK		ASTE003612-PA	5	550.963	1650.88	3	3.58	47.16	-3.42	1
ASTE005795-PA	11.84	5	5	5	456	53.337	9.17	Testis
									YWIGEIEDR		ASTE005795-PA	1	590.785	1180.56	2	2.39	47.64	-1.31	0
									LLPIGANESSTAK		ASTE005795-PA	1	650.858	1300.71	2	2.15	23.26	-1.81	0
									LFELFVR		ASTE005795-PA	1	462.272	923.537	2	2.27	35.43	1.98	0
									QLQLALAR		ASTE005795-PA	1	456.785	912.562	2	2.4	49.38	-0.16	0
									NPRQNPTQLADVPIMcR	C16(Carbamidomethyl)	ASTE005795-PA	1	670.671	2010	3	1.69		-0.63	1
ASTE002371-PA	13.2	4	4	4	515	58.256	7.18	Midgut,Brain,Testis
									YDDISLPK		ASTE002371-PA	1	475.744	950.482	2	2.11	46	-1.43	0
									GLSPAEMSAVEAIHR		ASTE002371-PA	1	523.269	1567.79	3	1.75	43.91	0.84	0
									SALELNPDcAPAYILLAEEEATTIVEAEK	C9(Carbamidomethyl)	ASTE002371-PA	1	1054.2	3160.57	3	2.52	34.15	4.06	0
									GHLFYPYPTcTEcADR	C10(Carbamidomethyl); C13(Carbamidomethyl)	ASTE002371-PA	1	662.953	1986.85	3	0.72		-1	0
ASTE009127-PA	31.95	4	5	38	169	18.706	6.54	Proboscis,Legs,Fatbody,Head,Maxillary palps,Thorax,Midgut,Brain,Antennaex,Malpighian tubules
									QKPITLEQGEK		ASTE009127-PA	8	635.855	1270.7	2	1.99	54.04	2.63	0
									TPFLLVGTQIDLR		ASTE009127-PA	13	736.928	1472.85	2		56.52	1.25	0
									DENSTLEK		ASTE009127-PA	1	468.221	935.434	2	2.17	35.36	2.43	0
									TcLLISYTTNK	C2(Carbamidomethyl)	ASTE009127-PA	8	657.341	1313.67	2		40.92	-1.72	0
									cVVVGDGAVGK	C1(Carbamidomethyl)	ASTE010709-PA;ASTE009127-PA	8	530.778	1060.55	2		33.98	2.49	0
ASTE001299-PA	9	1	1	4	100	11.114	4.84	Proboscis
									YSVWLPDGR		ASTE001299-PA	4	546.777	1092.55	2		50.38	0.09	0
ASTE001551-PA	0.48	1	1	1	2279	256.085	6.11	Fatbody
									VSLAPmPDTSK	M6(Oxidation)	ASTE001551-PA	1	581.293	1161.58	2	1.45	16.24	-2.83	0
ASTE004768-PA	9.86	1	1		71	7.738	9.31	Midgut
									VVQcTSK	C4(Carbamidomethyl)	ASTE004768-PA	1	411.213	821.418	2	1.41	54.41	-0.18	0
ASTE001195-PA	18.85	8	8	41	366	41.814	5.9	Midgut,Brain,Male accessory glands,Salivary glands
									TGAIIFPDELSTRYEQERETLAK		ASTE001195-PA	1	667.598	2667.37	4	3.19	10.82	2.43	2
									VFMDGGEYSGR		ASTE001195-PA	3	609.265	1217.52	2	2.75	65.72	-1.65	0
									VTILEYR		ASTE001195-PA	7	447.258	893.509	2	1.37	38.91	0.09	0
									TGAIIFPDELSTR		ASTE001195-PA	7	710.379	1419.75	2	1.86	80.13	1.69	0
									VFmDGGEYSGR	M3(Oxidation)	ASTE001195-PA	1	617.264	1233.52	2	1.93	41.54	-0.17	0
									QVYNPNNcR	C8(Carbamidomethyl)	ASTE001195-PA	1	582.764	1164.52	2	2.3	27.54	-0.39	0
									ELVPVEEHVR		ASTE001195-PA	12	402.887	1206.65	3	1.14	38.76	-0.05	0
									YYFYPScTR	C7(Carbamidomethyl)	ASTE001195-PA	9	628.766	1256.53	2	2.7		-12.26	0
ASTE010559-PA	12.72	5	5	10	511	57.71	6.57	Midgut,Brain,Salivary glands
									TDGLKPSIAHR		ASTE010559-PA	2	398.891	1194.66	3	3.69	46.18	0.28	0
									AQLGNQEVAVK		ASTE010559-PA	1	578.82	1156.63	2	2.33	52.9	0.22	0
									LPFEAELGPHPTLEEMQENVVMK		ASTE010559-PA	1	880.097	2638.28	3	3.87	12.21	-4.88	0
									GLTHLHEEIQGSR		ASTE010559-PA	5	738.881	1476.76	2	1.43	49.69	0.16	0
									IFPMQER		ASTE010559-PA	1	460.737	920.467	2	1.1		1.36	0
ASTE009004-PA	57.14	12	12	36	161	18.487	9.74	Legs,Fatbody,Malpighian tubules,Thorax,Midgut,Brain,Ovary,Salivary glands
									HTDVLILSQYVR		ASTE009004-PA	2	481.937	1443.8	3	2.84	39.92	0.69	0
									GEYVPSPR		ASTE009004-PA	3	452.727	904.447	2	1.37	32.32	-5.76	0
									YYDEETIKc	C9(Carbamidomethyl)	ASTE009004-PA	2	610.76	1220.51	2	1.81	48.27	-1.13	1
									MGALVTMAQK		ASTE009004-PA	1	525.277	1049.55	2	2.21	72.06	-1.29	0
									TNDTLVIK		ASTE009004-PA	3	452.261	903.515	2	2.44	45.74	0.97	0
									FcPQcTLGLDIK	C2(Carbamidomethyl); C5(Carbamidomethyl)	ASTE009004-PA	3	726.353	1451.7	2	2.19	45.07	-2.02	0
									AGLMPNLNPSTSK		ASTE009004-PA	10	665.346	1329.68	2	1.37	34.55	0.53	0
									YYDEETIK		ASTE009004-PA	1	530.745	1060.48	2	1.66	26.95	-0.72	0
									AGLmPNLNPSTSK	M4(Oxidation)	ASTE009004-PA	3	673.342	1345.68	2	2.69	49.15	-0.78	0
									SDGcmLPR	C4(Carbamidomethyl); M5(Oxidation)	ASTE009004-PA	1	476.204	951.401	2	2.09	40.09	-1.02	0
									TNDTLVIKGEYVPSPR		ASTE009004-PA	2	596.988	1788.95	3	3.09	39.42	0.35	1
									QDTVIPQLLEAR		ASTE009004-PA	5	691.885	1382.76	2	3.02	70.97	-0.11	0
ASTE003397-PA	26.13	15	15	92	773	83.874	5.5	Proboscis,Malpighian tubules,Thorax,Midgut,Brain,Salivary glands
									mLVEWDEVYLR	M1(Oxidation)	ASTE003397-PA	1	734.862	1468.72	2	3.09	66.9	1.92	0
									IAFGIELNQK		ASTE003397-PA	4	566.822	1132.64	2	1.45	40.73	0.55	0
									KWQELNELAGNIGEDVVAADK		ASTE003397-PA	6	767.058	2299.16	3	1.08	13.59	0.98	1
									ESLDDISGVTSEcEK	C13(Carbamidomethyl)	ASTE003397-PA	1	834.865	1668.72	2	1.08	64.1	-2.33	0
									TLLmSHTAQQLTLEAENEFGTAK	M4(Oxidation)	ASTE003397-PA	1	850.424	2549.26	3	1.04	35.83	1.36	0
									SVVSKGFNcVDRK	C9(Carbamidomethyl)	ASTE003397-PA	1	499.261	1495.77	3	4.46	40.92	-0.16	2
									LLTLDVAVLR		ASTE003397-PA	1	556.859	1112.71	2	1.36	55.89	5.77	0
									TIVSFPQSLLFLPISLAIDGTK		ASTE003397-PA	11	1180.68	2360.35	2		51.36	2.6	0
									GFNcVDR	C4(Carbamidomethyl)	ASTE003397-PA	2	434.193	867.379	2	1.5	39.5	0.83	0
									LLSTGYQNSFGQLFLER		ASTE003397-PA	1	987.009	1973.01	2	3.14	75.02	-0.63	0
									YEQFFAALQDK		ASTE003397-PA	1	680.333	1359.66	2	1.32	73.59	0.73	0
									ADLLQcAGDLVEQAK	C6(Carbamidomethyl)	ASTE003397-PA	6	815.909	1630.81	2	1.76	57.22	0.31	0
									cAQGQTVDAMAK	C1(Carbamidomethyl)	ASTE003397-PA	1	640.293	1279.58	2	2.6	67.06	1.48	0
									WQELNELAGNIGEDVVAADK		ASTE003397-PA	36	1086.04	2171.08	2	4.44	113.91	7.29	0
									cVGNSLNPTNVAR	C1(Carbamidomethyl)	ASTE003397-PA	19	701.349	1401.69	2	2.34	79.71	-0.37	0
ASTE001634-PA	4.4	6	6		2024	217.819	4.91	Larvae,Pupa
									FVWcQQGTAR	C4(Carbamidomethyl)	ASTE001634-PA	3	626.805	1252.6	2	1.67	19.03	10.88	0
									GEVFDQGLGR		ASTE001634-PA	1	539.27	1077.53	2	2.65	39.54	0.21	0
									GEVFEVREGKcVVGNTETcLR	C11(Carbamidomethyl); C19(Carbamidomethyl)	ASTE001634-PA	2	813.737	2439.2	3	2.15		8.01	2
									FScPVGEIWSQK	C3(Carbamidomethyl)	ASTE001634-PA	2	719.345	1437.68	2	0.82	17.86	0.32	0
									GGNADVLPcPPGEILR	C9(Carbamidomethyl)	ASTE001634-PA	2	832.924	1664.84	2	3.35	37.4	-0.51	0
									GQNAVLLTcPAGSIFNAPTR	C9(Carbamidomethyl)	ASTE001634-PA	1	1044.04	2087.07	2	2.95	40.88	1.65	0
ASTE003434-PA	67.81	13	13	45	146	16.383	5.52	Antennaex
									mLHELcVAESGASEELLR	M1(Oxidation); C6(Carbamidomethyl)	ASTE003434-PA	4	1030.49	2059.98	2	3.18	47.27	2.25	0
									AcSHIVTPDKcDTAYETVK	C2(Carbamidomethyl); C11(Carbamidomethyl)	ASTE003434-PA	7	1098.02	2195.02	2	4.39	53.49	5.44	1
									QcmDGTVHSDPAVK	C2(Carbamidomethyl); M3(Oxidation)	ASTE003434-PA	2	520.898	1560.68	3	3.87	30.78	1.07	0
									QcMDGTVHSDPAVK	C2(Carbamidomethyl)	ASTE003434-PA	2	772.846	1544.69	2	3.89	55.59	1.59	0
									DAVNQLTR		ASTE003434-PA	1	458.745	916.483	2		47.79	-1.71	0
									cYIHcLFDKIDVIEEGTGR	C1(Carbamidomethyl); C5(Carbamidomethyl)	ASTE003434-PA	2	1163.05	2325.08	2	4.66	98.03	-7.21	1
									IDVIEEGTGR		ASTE003434-PA	1	544.782	1088.56	2		47.07	-1.81	0
									AcSHIVTPDK	C2(Carbamidomethyl)	ASTE003434-PA	2	564.279	1127.55	2	3.84	62.39	-0.09	0
									LLYIIPDDVKDAVNQLTR		ASTE003434-PA	9	1043.58	2086.16	2	3.58	65.73	0.34	1
									cYFNAHDEVIK	C1(Carbamidomethyl)	ASTE003434-PA	3	698.321	1395.63	2	3.75	52.54	-0.65	0
									LLYIIPDDVK		ASTE003434-PA	4	594.845	1188.68	2		29.35	-3.35	0
									cDTAYETVK	C1(Carbamidomethyl)	ASTE003434-PA	1	543.744	1086.48	2		52.9	3.47	0
									MLHELcVAESGASEELLR	C6(Carbamidomethyl)	ASTE003434-PA	7	1022.5	2043.99	2	4.76	64.2	2.23	0
ASTE011250-PA	16.08	7	7		479	55.363	8.05	Proboscis,Brain,Ovary,Salivary glands,Testis
									TLLNNDEALWNR		ASTE011250-PA	6	729.872	1458.74	2	2.12	24	2.63	0
									DHPLQLQAMYELR		ASTE011250-PA	1	807.412	1613.82	2	1.75	11.19	3.31	0
									ITFVYLSK		ASTE011250-PA	3	485.784	970.561	2	2.15	44.82	0.27	0
									NPFATWLK		ASTE011250-PA	3	488.767	976.527	2	1.52	44.45	1.64	0
									LYVYTGDLDAKPAEILAK		ASTE011250-PA	1	660.695	1980.07	3	3.93	58.17	0.7	0
									IYGWVGR		ASTE011250-PA	2	425.732	850.457	2	1.43	25.59	0.06	0
									HLSLENSVEFR		ASTE011250-PA	3	665.84	1330.67	2	2.85	90.53	-1.06	0
ASTE001071-PA	0.39	1	1		2843	295.08	6.65	Midgut
									VMSDQFTPDER		ASTE001071-PA	1	662.794	1324.58	2	2.22	40.76	-1.99	0
ASTE010263-PA	60.04	36	36	215	553	63.63	6.64	Proboscis,Legs,Brain,Fatbody,Head,Malpighian tubules,Maxillary palps,Thorax,Midgut,Testis,Haemolymph,Male accessory glands,Antennaex,Ovary,Pupa,Salivary glands
									TDRPAGIIHFSQK		ASTE010263-PA	26	490.602	1469.79	3	3.16	21.18	4.12	0
									mIQEccTYVDKTPDKETK	M1(Oxidation); C5(Carbamidomethyl); C6(Carbamidomethyl)	ASTE010263-PA	2	566.258	2262.01	4	2.64	19.26	0.5	2
									MEVDYSATcDEKIPLcK	C9(Carbamidomethyl); C16(Carbamidomethyl)	ASTE010263-PA	5	1029.96	2058.92	2	6.05	80.25	0.16	1
									EKVELILEQmR	M10(Oxidation)	ASTE010263-PA	1	702.381	1403.76	2	2.39	64.01	-1.19	1
									mEVDYSATcDEKIPLcK	M1(Oxidation); C9(Carbamidomethyl); C16(Carbamidomethyl)	ASTE010263-PA	3	1037.96	2074.91	2	3.56	73.71	-2.56	1
									MVNAGTLK		ASTE010263-PA	8	417.232	833.457	2	2.32	41.7	2.57	0
									EmAKDENKFNEALEILLQLEK	M2(Oxidation)	ASTE010263-PA	1	841.102	2521.29	3	3.5	45.8	2.39	2
									ELINFDALcTVYGAELNTFDIFNQETSHGK	C9(Carbamidomethyl)	ASTE010263-PA	2	1149.55	3446.64	3	2.17		5.07	0
									LKLIDTLR		ASTE010263-PA	1	486.315	971.623	2		47.49	-1.8	1
									FFNDAEQQDLK		ASTE010263-PA	18	677.82	1354.63	2		90.99	4.64	0
									FFNDAEQQDLKLK		ASTE010263-PA	2	798.408	1595.81	2	3.41	80.07	1.9	1
									MIQEccTYVDKTPDKETK	C5(Carbamidomethyl); C6(Carbamidomethyl)	ASTE010263-PA	8	562.261	2246.02	4	3.93	19.46	4.44	2
									HYLAVVDSEMIAQETERR		ASTE010263-PA	1	716.355	2147.05	3	3.87	25.81	-2.01	1
									MAELLDLSEGEcEEYLSR	C12(Carbamidomethyl)	ASTE010263-PA	5	1072.48	2143.94	2	5.17	105.37	-3.7	0
									EKVELILEQMR		ASTE010263-PA	5	694.383	1387.76	2	3.32	34.36	-1.26	1
									LLEELPVYKELLR		ASTE010263-PA	3	538.987	1614.95	3	2.89	34.19	-0.2	1
									DENKFNEALEILLQLEK		ASTE010263-PA	6	682.698	2046.08	3	5.17	51.7	1.32	1
									IGADMVSSAR		ASTE010263-PA	9	503.755	1006.5	2	2.93	69.88	3.43	0
									mAELLDLSEGEcEEYLSR	M1(Oxidation); C12(Carbamidomethyl)	ASTE010263-PA	9	1080.48	2159.95	2	3.68	143.91	1.39	0
									IISNYYTR		ASTE010263-PA	7	515.272	1029.54	2	1.7	43.62	-0.08	0
									SASEVLNDWAFGLNELmNLVNK	M17(Oxidation)	ASTE010263-PA	11	1240.61	2480.21	2	3.7	78.38	-0.6	0
									MEVDYSATcDEK	C9(Carbamidomethyl)	ASTE010263-PA	8	724.29	1447.57	2	1.18	85.15	0.55	0
									IYVEVER		ASTE010263-PA	22	454.25	907.492	2		42.03	4.24	0
									LDKDSSFIK		ASTE010263-PA	8	351.526	1052.56	3	1.48	31.91	0.05	1
									YYDLMIR		ASTE010263-PA	5	487.245	973.484	2	1.81	32.41	2.5	0
									IGADmVSSAR	M5(Oxidation)	ASTE010263-PA	15	511.751	1022.49	2	2.04	62.24	0.35	0
									ELINFDALcTVYGAELNTFDIFNQETSHGKK	C9(Carbamidomethyl)	ASTE010263-PA	2	894.437	3574.72	4	3.92	20.52	2.38	1
									KSASEVLNDWAFGLNELMNLVNK		ASTE010263-PA	1	864.775	2592.31	3		78.53	-0.38	1
									MIQEccTYVDK	C5(Carbamidomethyl); C6(Carbamidomethyl)	ASTE010263-PA	4	723.807	1446.61	2	1.47	48.78	-0.08	0
									FNEALEILLQLEK		ASTE010263-PA	1	780.439	1559.87	2	4.67	76.49	1.15	0
									HYLAVVDSEMIAQETER		ASTE010263-PA	6	664.326	1990.96	3	4.82	35.58	4.84	0
									SASEVLNDWAFGLNELMNLVNK		ASTE010263-PA	2	1232.61	2464.22	2		85.54	0.6	0
									mEVDYSATcDEK	M1(Oxidation); C9(Carbamidomethyl)	ASTE010263-PA	2	732.288	1463.57	2	3.25	66.74	0.93	0
									mVNAGTLK	M1(Oxidation)	ASTE010263-PA	3	425.229	849.45	2	2.12	35.54	-0.05	0
									YYDLmIR	M5(Oxidation)	ASTE010263-PA	2	495.243	989.48	2	1.37	44.46	3.59	0
									LIEHNVR		ASTE010263-PA	1	440.754	880.5	2	1.62	34.76	0.17	0
ASTE003118-PA	40.39	23	23	77	760	84.136	4.93	Brain,Head,Ovary
									VEEGAPNGSPVIK		ASTE003118-PA	2	648.845	1296.68	2	3.55	60.19	2.17	0
									ELDFEDLR		ASTE003118-PA	3	518.752	1036.5	2	1.73	52.7	1.7	0
									GYPPLSR		ASTE003118-PA	1	395.216	789.426	2	1.26		0.4	0
									FVSVTVK		ASTE003118-PA	2	390.238	779.468	2	1.5	30.11	2.08	0
									FELPDYQAHNVDEDIPLGTSILK		ASTE003118-PA	3	872.102	2614.29	3	4.19	54.66	-4.18	0
									DcGTYYPK	C2(Carbamidomethyl)	ASTE003118-PA	2	502.213	1003.42	2	1.68	38.85	0.5	0
									ANNPPVWDNTVYGPIYVK		ASTE003118-PA	6	1024.02	2047.03	2	4.61	48.99	-1.82	0
									RAPQFYMPSYEAEIPENQK		ASTE003118-PA	2	766.7	2298.08	3	4.37	37.93	-0.88	1
									TGGRFEVDER		ASTE003118-PA	4	389.193	1165.56	3	2.02	17.35	3.67	1
									DSDIISVK		ASTE003118-PA	3	438.739	876.47	2	2.46		3.14	0
									VQATDEDKGVNGQVK		ASTE003118-PA	2	529.938	1587.8	3	5.15	49.78	0.71	1
									YSIVQQPNQK		ASTE003118-PA	7	602.818	1204.63	2	2.58	20.05	-2.3	0
									TIYGPIHIR		ASTE003118-PA	3	535.312	1069.62	2	1.03	28.01	1.33	0
									VFDREGDDGKFVSVTVK		ASTE003118-PA	1	633.326	1897.96	3	3.68	37.39	-1.01	2
									FTVDEETGEVSTNK		ASTE003118-PA	6	778.362	1555.72	2	4.03	96.92	2.61	0
									VTDVNDNAPK		ASTE003118-PA	1	536.767	1072.53	2	3.3	77.47	0.15	0
									YVENVKQDASIGTNILR		ASTE003118-PA	2	960.496	1919.98	2	2.68	48.2	-18.11	1
									FSQQVYTPNVDENAGPNTLVTTVVASDKDGDNVR		ASTE003118-PA	1	1217.59	3650.76	3	7.73	86.15	1.84	1
									AQGQGAGTFNIGPTSGIVK		ASTE003118-PA	8	901.975	1802.94	2	4.34	69.12	1.76	0
									TVEVQIDVVDR		ASTE003118-PA	1	636.837	1272.67	2	1.69		-9.58	0
									QDASIGTNILR		ASTE003118-PA	2	594.316	1187.62	2		29.56	-11.36	0
									FGFVGGGTSSGQFVIEEITGVIR		ASTE003118-PA	14	786.413	2357.22	3	3.22	27.17	3.96	0
									APQFYMPSYEAEIPENQK		ASTE003118-PA	1	1071.49	2141.98	2	2.05	25.59	-2.28	0
ASTE002391-PA	19.45	9	9	19	509	57.055	7.56	Fatbody,Maxillary palps,Midgut,Brain,Male accessory glands,Ovary,Malpighian tubules
									LLALLGQALK		ASTE002391-PA	4	520.346	1039.68	2		50.56	-2.96	0
									AAIRDQEDESYPTQLAR		ASTE002391-PA	4	981.98	1962.95	2	5.11	72.72	0.59	1
									sIEIESADVIR	N-Term(Acetyl)	ASTE002391-PA	1	637.336	1273.66	2		43.45	1.26	0
									LIQQYLK		ASTE002391-PA	2	453.276	905.545	2	1.83	35.44	-0.65	0
									SNTVVImNmQGQIVR	M7(Oxidation); M9(Oxidation)	ASTE002391-PA	1	861.439	1721.87	2	1.33	26.11	1.89	0
									DQEDESYPTQLAR		ASTE002391-PA	3	776.35	1551.69	2	2.25	30.44	-0.25	0
									DNSQILTASFDHLIR		ASTE002391-PA	1	577.301	1729.89	3	3.26	38.4	1.61	0
									QTDPMIMLK		ASTE002391-PA	2	538.781	1076.55	2	1.45	43.38	5.41	0
									DSEMLATGSQDGQVK		ASTE002391-PA	1	783.356	1565.7	2	2.13	12.25	-4.46	0
ASTE002223-PA	12.22	1	1	4	90	9.38	6.03	Fatbody,Midgut
									mEHQVDNLLDK	N-Term(Acetyl)	ASTE002223-PA	4	692.333	1383.66	2		85.25	0.38	0
ASTE006162-PA	14.36	2	2		188	20.973	6.34	Proboscis,Fatbody,Antennaex
									AYELVHQSQGLEQTR		ASTE006162-PA	1	586.962	1758.87	3		48.67	-2.78	0
									LASQISESPYQK		ASTE006162-PA	2	675.851	1350.69	2	3.68	62.77	3.51	0
ASTE003833-PA	12.99	1	1	2	77	8.857	9.44	Brain
									YSPFENPPAK		ASTE003833-PA	2	575.281	1149.55	2	2.16	51.44	-3.18	0
ASTE002103-PA	14.16	2	2	3	226	25.49	11.58	Brain
									GPGPGGTTHNSRPPTGmPK	M17(Oxidation)	ASTE002103-PA	2	466.229	1861.89	4	2.36		-1.3	0
									DTPTSSGPNSFGK		ASTE002103-PA	1	647.799	1294.59	2	3.01	44.19	-0.79	0
ASTE003307-PA	11.15	0	3	8	314	34.92	7.6	Fatbody,Brain
									VLDGQGVVHK		ASTE003307-PA;ASTE007661-PA	6	351.202	1051.59	3	3.69	48.82	1.04	0
									ITIGLFGEEAPK		ASTE007661-PA;ASTE003307-PA	1	637.854	1274.7	2	3.23	44.93	1.14	0
									QLcTQDVDGFSYK	C3(Carbamidomethyl)	ASTE003307-PA;ASTE007661-PA	1	780.853	1560.7	2	2.56	82.97	-1.05	0
ASTE007929-PA	78.59	35	35	514	383	42.712	7.87	Proboscis,Brain,Fatbody,Head,Maxillary palps,Male accessory glands,Antennaex,Pupa,Salivary glands
									VYGQVVcSFR	C7(Carbamidomethyl)	ASTE007929-PA	38	607.792	1214.58	2	2.48	55.73	-17.3	0
									VTLYMGK		ASTE007929-PA	1	406.224	811.44	2		48.26	2.04	0
									YGREEDEVMGLNFQK		ASTE007929-PA	15	605.618	1814.84	3	2.19	33.01	1.14	1
									IFAGDSETDRTHR		ASTE007929-PA	3	502.242	1504.71	3		20.07	-1.66	1
									AmVQQGVDVVLFQNGSYR	M2(Oxidation)	ASTE007929-PA	3	676.339	2027	3		62.94	0.96	0
									IQFAPTK		ASTE007929-PA	4	402.735	804.462	2	1.52	53.94	0.94	0
									ELcLASEQIYPRPEK	C3(Carbamidomethyl)	ASTE007929-PA	40	916.96	1832.91	2	2.19	76.48	-4.26	0
									RSTVTLGIRK		ASTE007929-PA	1	377.572	1130.7	3	3	20.29	-0.29	2
									VTLYmGK	M5(Oxidation)	ASTE007929-PA	1	414.22	827.432	2	1.23	30.53	-0.93	0
									KIQFAPTK		ASTE007929-PA	17	466.782	932.557	2		61.33	0.74	1
									QGQQPcTVVRK	C6(Carbamidomethyl)	ASTE007929-PA	2	650.842	1300.68	2		58.27	-1.1	1
									VIHADSQADVETFRQDTVDQQASVDFD		ASTE007929-PA	16	1012.8	3036.4	3	4.79	23.86	5.21	1
									RDFVDHVAGVEPIDGIVVLDDEYIR		ASTE007929-PA	7	711.117	2841.45	4		56.24	1.17	1
									DFVDHVAGVEPIDGIVVLDDEYIRDNR		ASTE007929-PA	3	768.386	3070.52	4		12.29	3.05	1
									IGVNIcIR	C6(Carbamidomethyl)	ASTE007929-PA	16	472.77	944.533	2		30.01	-1.99	0
									QLYLHGER		ASTE007929-PA	1	508.269	1015.53	2	2.63	33.73	-0.85	0
									AKVIHADSQADVETFR		ASTE007929-PA	1	596.307	1786.91	3		47.64	-0.42	1
									QEQcLASTTLLAQPDQR	C4(Carbamidomethyl)	ASTE007929-PA	13	979.985	1958.96	2	3.62	81.88	1.33	0
									EEDEVmGLNFQK	M6(Oxidation)	ASTE007929-PA	4	727.828	1454.65	2		65.93	1.03	0
									KDFmLSPGELELEVTLDK	M4(Oxidation)	ASTE007929-PA	3	694.022	2080.05	3		62.28	-0.47	1
									EEDEVMGLNFQK		ASTE007929-PA	4	719.829	1438.65	2	1.91	26.52	-0.97	0
									VMYLTPLLSSNK		ASTE007929-PA	47	683.378	1365.75	2	1.42	58.9	2.93	0
									GVALDGQIKR		ASTE007929-PA	7	528.811	1056.62	2	2.98	48.08	-1.22	1
									DFVDHVAGVEPIDGIVVLDDEYIR		ASTE007929-PA	106	895.773	2685.31	3	2		-13.04	0
									IFAGDSETDR		ASTE007929-PA	38	555.756	1110.51	2	1.59	34.51	-0.97	0
									KVYGQVVcSFR	C8(Carbamidomethyl)	ASTE007929-PA	9	671.84	1342.67	2	3.66	62.55	-15.56	1
									STVTLGIRK		ASTE007929-PA	2	487.803	974.599	2	3.1	41.75	-0.63	1
									RSTVTLGIR		ASTE007929-PA	12	501.806	1002.6	2	2.86	47.42	-1.26	1
									YGREEDEVmGLNFQK	M9(Oxidation)	ASTE007929-PA	24	915.906	1830.81	2	4.3	65.91	-14.98	1
									VYNFKVFKK		ASTE007929-PA	1	391.56	1172.66	3		17.39	-15.02	2
									VmYLTPLLSSNK	M2(Oxidation)	ASTE007929-PA	52	691.373	1381.74	2	2.47	45.15	-0.49	0
									AMVQQGVDVVLFQNGSYR		ASTE007929-PA	3	1006.01	2011.01	2	4.91	90.68	2.54	0
									RGVALDGQIKR		ASTE007929-PA	12	606.862	1212.72	2	3.88	47.11	-0.39	2
									DFVDHVAGVEPIDGIVVLDDEYIRDNRK		ASTE007929-PA	1	800.409	3198.61	4	6.93	29.7	2.47	2
									STVTLGIR		ASTE007929-PA	7	423.749	846.49	2	2.25	43.53	-17.02	0
ASTE004221-PA	8.39	1	1		143	15.091	9.13	Midgut
									NELLGTGIDDVK		ASTE004221-PA	1	637.336	1273.66	2	2.39	26.64	0.58	0
ASTE005710-PA	38.83	12	12		412	48.515	7.74	Proboscis,Legs,Brain,Larvae,Fatbody,Head,Malpighian tubules,Maxillary palps,Thorax,Midgut,Testis,Male accessory glands,Antennaex,Ovary,Salivary glands
									GPGEQQQSTATPQLLSK		ASTE005710-PA	12	885.453	1769.9	2		51.9	-2.21	0
									DVLVHPDWTYQTGWR		ASTE005710-PA	18	936.955	1872.9	2	2.16	68.51	0.16	0
									LLAEQmAEREHEEK	M6(Oxidation)	ASTE005710-PA	1	576.946	1728.82	3		12.04	-0.06	1
									WRPSFLGGGR		ASTE005710-PA	4	566.808	1132.61	2	3.25	36.19	7.13	0
									VIVVDWDPNSTK		ASTE005710-PA	16	686.859	1372.71	2		47.2	-0.64	0
									DATHFVDGHHVK		ASTE005710-PA	5	454.89	1362.66	3	3.34	32.76	0.58	0
									MIQEPSR		ASTE005710-PA	3	430.718	860.43	2	1.48	23.81	0.19	0
									LFPQTAVEGTENEKQQEK		ASTE005710-PA	13	692.684	2076.04	3	3.81	60.97	6.28	1
									YPYVQPPYTLVLEMK		ASTE005710-PA	2	920.986	1840.96	2	2.23	58.89	5.34	0
									LFPQTAVEGTENEK		ASTE005710-PA	6	781.889	1562.77	2	1.63	12.85	0.51	0
									VIVVDWDPNSTKLHPENTLNIPR		ASTE005710-PA	1	886.476	2657.41	3	5.17		3.17	1
									NLPAVQR		ASTE005710-PA	1	399.235	797.462	2	1.53	27.7	-0.73	0
ASTE000183-PA	27.43	3	3		175	20.106	5.48	Proboscis,Fatbody,Maxillary palps,Brain,Salivary glands
									LYESTSANR		ASTE000183-PA	1	520.755	1040.5	2	1.7	36.18	2.62	0
									TEVLEQIIEEYGNR		ASTE000183-PA	1	846.927	1692.85	2	0.76	59.26	1.27	0
									EELLQIIQSTDR		ASTE000183-PA	2	722.886	1444.76	2		36.76	0.13	0
ASTE002516-PA	8.31	3	3	8	397	44.144	7.03	Fatbody,Brain,Ovary,Malpighian tubules
									VVFPLELR		ASTE002516-PA	6	486.798	972.588	2		47.18	0.4	0
									IEASTIEDFYGLTSDIQK		ASTE002516-PA	1	1015.5	2030	2	4.53	101.07	1.02	0
									YMEQYNR		ASTE002516-PA	1	502.219	1003.43	2	1.59	28.5	-0.23	0
ASTE002095-PA	54.48	23	23	168	547	60.748	6.48	Proboscis,Legs,Brain,Fatbody,Head,Malpighian tubules,Maxillary palps,Thorax,Midgut,Testis,Male accessory glands,Antennaex,Ovary,Pupa,Salivary glands
									LSALEIETALHEHPDTSDVAVLGLPDETWGQR		ASTE002095-PA	12	1167.25	3499.73	3	7.87	50.67	-1.09	0
									LLVWLEQK		ASTE002095-PA	20	514.813	1028.62	2		44.73	3.91	0
									TSVDIIK		ASTE002095-PA	4	388.232	775.457	2	1.5	37.98	0.8	0
									GVVLSYANLDAQLR		ASTE002095-PA	3	759.918	1518.83	2	3.86	41.55	0.74	0
									QGcVGMPLPGVSVR	C3(Carbamidomethyl)	ASTE002095-PA	3	728.874	1456.74	2	2.95	69.94	0.19	0
									YPADLLEYYIK		ASTE002095-PA	30	694.36	1387.71	2		68.4	-1.86	0
									DADALILYTSGTTGKPK		ASTE002095-PA	19	584.311	1750.92	3		17.39	-2.41	0
									RENLLQLNDTLVVESALNGEFYR		ASTE002095-PA	1	898.468	2693.39	3	5	46.03	-0.31	1
									LmISGSAPLPGNIFDR	M2(Oxidation)	ASTE002095-PA	4	852.444	1703.88	2	4.99	71.59	0.91	0
									FDSSSVWSYLLNVNmTTK	M15(Oxidation)	ASTE002095-PA	2	1054.5	2108	2	4.26	79.96	-2.21	0
									QGcVGmPLPGVSVR	C3(Carbamidomethyl); M6(Oxidation)	ASTE002095-PA	3	736.873	1472.74	2		34.21	3.14	0
									ELVEQLYGATPSPSTEPQNVDKP		ASTE002095-PA	18	1250.11	2499.22	2		19.88	-3.38	0
									IVEPETGR		ASTE002095-PA	5	450.743	900.479	2	2.12	47.41	0.53	0
									VNVFMGVPTMYGLLIR		ASTE002095-PA	1	905.493	1809.98	2	1.3		1.9	0
									IVEEIPR		ASTE002095-PA	7	428.252	855.496	2		50.95	3.17	0
									SYWQKPQETASEFDAEGWFR		ASTE002095-PA	7	821.374	2462.11	3	7.09	61.91	0.86	0
									LMISGSAPLPGNIFDR		ASTE002095-PA	5	844.444	1687.88	2		70.67	-1.58	0
									FDSSSVWSYLLNVNMTTK		ASTE002095-PA	1	1046.51	2092	2	1.6	24.63	-1.62	0
									LmISGSAPLPGNIFDRWNEITGHR	M2(Oxidation)	ASTE002095-PA	1	899.797	2697.38	3	2.28	12.14	7.04	1
									QLTLEGR		ASTE002095-PA	2	408.733	816.458	2	0.84		0.39	0
									YGMTEIGMAISNPYLQDGEWR		ASTE002095-PA	1	1216.06	2431.11	2	4.23	82.73	3.4	0
									VVAVISLR		ASTE002095-PA	16	428.783	856.558	2		56.44	-3.78	0
									VNVFmGVPTmYGLLIR	M5(Oxidation); M10(Oxidation)	ASTE002095-PA	3	921.486	1841.96	2	4.07	53.53	-0.63	0
ASTE006924-PA	69.57	9	9	107	184	20.422	11.47	Proboscis,Legs,Larvae,Fatbody,Malpighian tubules,Maxillary palps,Midgut,Brain,Testis,Male accessory glands,Antennaex,Ovary,Pupa,Salivary glands
									NVLFYVGK		ASTE006924-PA	38	470.269	939.53	2		42.69	0.1	0
									SRQTPEAIR		ASTE006924-PA	2	353.197	1057.58	3	2.29	37.24	0.28	1
									TNLPGHAMGHcIR	C11(Carbamidomethyl)	ASTE006924-PA	21	488.573	1463.7	3		50.04	2.74	0
									KNVLFYVGKR		ASTE006924-PA	2	408.578	1223.72	3		29.67	-5.38	2
									aDTATAAAKKPAKK	N-Term(Acetyl)	ASTE006924-PA	2	471.94	1413.81	3		51.27	-0.25	2
									TNLPGHAmGHcIR	M8(Oxidation); C11(Carbamidomethyl)	ASTE006924-PA	19	370.68	1479.7	4	1.29	27.39	1.35	0
									AVFTGYKR		ASTE006924-PA	13	471.264	941.521	2	1.52	39.48	0.66	1
									aDTATAAAKKPAK	N-Term(Acetyl)	ASTE006924-PA	4	643.36	1285.71	2		67.14	0.94	1
									aDTATAAAK	N-Term(Acetyl)	ASTE006924-PA	6	431.219	861.431	2		58.26	-0.38	0
ASTE008681-PA	3.53	3	3	4	991	110.208	7.11	Fatbody,Brain,Salivary glands
									IANVPTANATSQQALVSDR		ASTE008681-PA	1	978.51	1956.01	2	1.77	79.28	-1.25	0
									AVHDVmQQTADASAGR	M6(Oxidation)	ASTE008681-PA	2	558.262	1672.77	3	3.24	67.24	0.29	0
									AVHDVMQQTADASAGR		ASTE008681-PA	1	828.891	1656.78	2	0.79	27.99	-0.44	0
ASTE000221-PA	46.5	42	42	425	901	100.245	7.96	Proboscis,Legs,Brain,Larvae,Fatbody,Head,Maxillary palps,Thorax,Midgut,Testis,Haemolymph,Male accessory glands,Antennaex,Ovary,Pupa,Salivary glands,Malpighian tubules
									YSLLRLEEGPPHTK		ASTE000221-PA	2	820.444	1639.88	2	3.75	45.48	0.82	1
									GGGREVITIYS		ASTE000221-PA	1	576.308	1151.61	2		40.35	1.97	1
									TLmMEQR	M3(Oxidation)	ASTE000221-PA	5	462.718	924.428	2	1.05	21.27	0.37	0
									DGIIPFLEPFAVSSKR		ASTE000221-PA	10	888.494	1775.98	2	2.57	62.16	6.2	1
									IFTVAQmEDNSIQIKK	M7(Oxidation)	ASTE000221-PA	1	627.664	1880.98	3	5.13	40.61	-1.26	1
									SGDLADAQK		ASTE000221-PA	2	452.722	904.436	2	2.53	50.75	-0.79	0
									GLAVVVSLIHGDFTKR		ASTE000221-PA	6	571.334	1711.99	3	4.23	52.58	0.82	1
									GLAVVVSLIHGDFTK		ASTE000221-PA	21	778.446	1555.88	2	3.86	90.3	-0.24	0
									LLQAIAK		ASTE000221-PA	19	378.753	756.498	2	1.67	43.94	0.25	0
									LLQAIAKDGIIPFLEPFAVSSK		ASTE000221-PA	7	786.456	2357.36	3	2.72		2.84	1
									TWHVFLQTVR		ASTE000221-PA	9	429.571	1286.7	3		16.13	-2.03	0
									TPNWRPR		ASTE000221-PA	2	463.751	926.494	2	2.03	35.05	-1.34	0
									LANNVSVSPVK		ASTE000221-PA	17	564.326	1127.64	2	3.04	55.53	2.01	0
									TLmmEQR	M3(Oxidation); M4(Oxidation)	ASTE000221-PA	6	470.715	940.423	2	0.93	33.44	-0.01	0
									ESNYMEFLEVLTEGLER		ASTE000221-PA	20	1029.99	2058.97	2	3.39	110.39	3.13	0
									GFcDVLVASNIADGLSHAVQTIGLGGmKPNTVIIGWPYGWR	C3(Carbamidomethyl); M27(Oxidation)	ASTE000221-PA	3	1097.31	4386.22	4	3.59	12.92	0.45	0
									TLMmEQR	M4(Oxidation)	ASTE000221-PA	4	462.718	924.428	2	1.54	48.05	0.44	0
									IFTVAQMEDNSIQIK		ASTE000221-PA	15	868.946	1736.88	2	1.84	53.02	-1.96	0
									SHDAQLVILNLPGPPKETYmER	M20(Oxidation)	ASTE000221-PA	6	631.828	2524.29	4	5.06	16.62	1.83	1
									EVTENDAAGAEK		ASTE000221-PA	10	617.283	1233.56	2	2.93	48.87	-1.23	0
									QSEDDRTWHVFLQTVR		ASTE000221-PA	19	1009	2016.99	2	2.32	16.51	0.91	1
									DKFGQSIGGK		ASTE000221-PA	4	518.768	1036.53	2	2.83	47.33	-13.27	1
									ESNYmEFLEVLTEGLER	M5(Oxidation)	ASTE000221-PA	29	1037.97	2074.93	2	2.74	94.07	-14.8	0
									TLMMEQR		ASTE000221-PA	10	454.72	908.434	2	1.95	47.75	0.69	0
									IFTVAQmEDNSIQIK	M7(Oxidation)	ASTE000221-PA	7	876.947	1752.89	2	2.17	27.74	2.21	0
									NWRPQILmLAK	M8(Oxidation)	ASTE000221-PA	25	693.393	1385.78	2	2.83	53	4.75	0
									IFTVAQMEDNSIQIKK		ASTE000221-PA	1	622.33	1864.98	3	4.68		-4.06	1
									SHDAQLVILNLPGPPKETYMER		ASTE000221-PA	5	836.773	2508.31	3	6.8	39.5	5.71	1
									LFSFVSQLK		ASTE000221-PA	30	534.809	1068.61	2	1.7	61.86	1.45	0
									LANNVSVSPVKDK		ASTE000221-PA	1	685.886	1370.76	2	4.44	50.84	-0.02	1
									GAEKEWGDGIR		ASTE000221-PA	10	609.301	1217.59	2	2.86	43.96	2.3	1
									LEEGPPHTK		ASTE000221-PA	8	504.263	1007.52	2	2.16	56.95	2.48	0
									SHDAQLVILNLPGPPK		ASTE000221-PA	36	849.979	1698.95	2	4.15	77.62	-1.38	0
									DASAmYNNFR	M5(Oxidation)	ASTE000221-PA	7	602.756	1204.5	2	2.47	61.82	-1.13	0
									FGQSIGGK		ASTE000221-PA	3	397.214	793.42	2	1.59	31.39	-0.14	0
									EWGDGIR		ASTE000221-PA	3	416.701	832.395	2	1.08	35.87	0.64	0
									DLKmFLYHLR	M4(Oxidation)	ASTE000221-PA	1	451.245	1351.72	3	3.71	45.37	0.61	1
									EQNISLVR		ASTE000221-PA	1	479.77	958.532	2	1.2		0.32	0
									NWRPQILMLAK		ASTE000221-PA	19	685.393	1369.78	2	3.55	51.6	0.47	0
									DASAMYNNFR		ASTE000221-PA	8	594.758	1188.51	2	2.17	39.37	-0.5	0
									SAFKPDEGNVR		ASTE000221-PA	24	407.208	1219.61	3	2.21	52.38	2.24	0
									LFLcVLGK	C4(Carbamidomethyl)	ASTE000221-PA	8	475.282	949.556	2	1.58	42.46	1.88	0
ASTE005401-PA	35.5	6	6		169	18.921	6.28	Proboscis,Legs,Fatbody,Maxillary palps,Brain,Testis
									NVTKEDVGAVGGVIMR		ASTE005401-PA	2	822.942	1644.88	2	4.47	77.53	1.9	1
									VALIAAWSIVKK		ASTE005401-PA	2	433.615	1298.83	3	3.11	44.12	9.36	1
									SLHAHALNVmNFIGTLIDYGLNDPALLK	M10(Oxidation)	ASTE005401-PA	1	767.409	3066.61	4	6.98	19.43	1.85	0
									EDVGAVGGVImR	M11(Oxidation)	ASTE005401-PA	4	609.811	1218.62	2		26.77	0.41	0
									EDVGAVGGVIMR		ASTE005401-PA	4	601.814	1202.62	2	1.71	45.35	0.35	0
									VALIAAWSIVK		ASTE005401-PA	4	585.867	1170.73	2		52.27	2.16	0
ASTE004719-PA	15.11	10	10		1138	124.312	3.94	Proboscis,Legs,Brain,Fatbody,Thorax,Pupa,Salivary glands
									ENQFESTcYSR	C8(Carbamidomethyl)	ASTE004719-PA	2	710.793	1420.58	2	2.73	43.83	-0.55	0
									MEEKPLFEGK		ASTE004719-PA	2	604.305	1207.6	2	2.29	72.31	0.42	0
									TVLLAGDLLAIPVLIYSR		ASTE004719-PA	49	643.061	1927.17	3	1.41		2.34	0
									mEEKPLFEGK	N-Term(Acetyl); M1(Oxidation)	ASTE004719-PA	4	633.31	1265.61	2		34.18	3.02	0
									KVTALAQALPVIAHFGFGR		ASTE004719-PA	7	666.057	1996.15	3		62.24	3.01	1
									FFGALIGIEHHYHR		ASTE004719-PA	2	424.977	1696.89	4	5.01	42.42	8.94	0
									VTALAQALPVIAHFGFGR		ASTE004719-PA	12	623.357	1868.06	3	2.95	39.7	1.38	0
									ATFDAHNEKDEGDEcSYPLDGFR	C15(Carbamidomethyl)	ASTE004719-PA	7	891.71	2673.12	3	1.03	24.33	-0.01	1
									TPPPEMcAPQASFLcNR	C7(Carbamidomethyl); C15(Carbamidomethyl)	ASTE004719-PA	2	659.299	1975.88	3	2.4	41.02	0.04	0
									FVSVPAcR	C7(Carbamidomethyl)	ASTE004719-PA	1	468.242	935.477	2	2	38.21	0.45	0
ASTE005703-PA	11.19	4	4		402	45.138	7.42	Midgut,Malpighian tubules,Pupa
									FVQEYGVDTSK		ASTE005703-PA	4	636.809	1272.61	2	2.41	34.1	0.15	0
									AQcLTVLPALR	C3(Carbamidomethyl)	ASTE005703-PA	3	621.357	1241.71	2		45.38	1.79	0
									DADLFPLR		ASTE005703-PA	1	473.754	946.501	2		43.7	1.62	0
									SAVNVKDFVGLRPVR		ASTE005703-PA	4	414.995	1656.96	4	2.19	23.22	1.55	1
ASTE007437-PA	3.1	1	1		226	25.183	4.82	Salivary glands
									LPEWLVR		ASTE007437-PA	1	456.769	912.53	2	0.87		-0.15	0
ASTE003911-PA	5.37	2	2	2	615	67.303	7.41	Brain
									LHHVYcDPTTNTcScEK	C6(Carbamidomethyl); C13(Carbamidomethyl); C15(Carbamidomethyl)	ASTE003911-PA	1	707.964	2121.88	3	6.25	46.04	-0.01	0
									ATALIGSNHTNVNVGR		ASTE003911-PA	1	541.957	1623.86	3	1.98	30.55	-0.25	0
ASTE001040-PA	7.86	5	5	12	598	61.007	5.4	Fatbody,Midgut,Brain,Salivary glands
									LPITPVGGVPMK		ASTE001040-PA	2	604.858	1208.71	2	1.95	29.78	0.69	0
									EISDNTPVEDVKNIFQGENcPR	C20(Carbamidomethyl)	ASTE001040-PA	2	854.404	2561.2	3	6.07	58.86	0.99	1
									EISDNTPVEDVK		ASTE001040-PA	5	673.328	1345.65	2	2.27	60.97	0.82	0
									ESPNVQVDEEGLK		ASTE001040-PA	2	722.351	1443.69	2	2.12	95.7	-0.53	0
									NIFQGENcPR	C8(Carbamidomethyl)	ASTE001040-PA	1	617.787	1234.57	2	2.16	36.64	2.78	0
ASTE009459-PA	49.41	0	12	104	170	18.202	8.49	Fatbody,Midgut,Testis,Brain,Salivary glands
									YQVSWNEEIK		ASTE001809-PA;ASTE009459-PA	6	648.317	1295.63	2	1.41	32.56	0.34	0
									IGENKYQVSWNEEIK		ASTE001809-PA;ASTE009459-PA	3	918.963	1836.92	2	5.35	63.51	2.88	1
									ASSGSYAVR		ASTE001809-PA;ASTE009459-PA	4	449.225	897.443	2	1.97	80.87	0.67	0
									LFDEESYAAVRK		ASTE001809-PA;ASTE009459-PA	2	476.578	1427.72	3	4.07	52.73	1.24	1
									SPLFAEVLGKLAPVVR		ASTE001809-PA;ASTE009459-PA	3	848.515	1696.02	2	4.55	95.67	4.37	1
									cSNAGAEKSPLFAEVLGKLAPVVR	C1(Carbamidomethyl)	ASTE001809-PA;ASTE009459-PA	4	838.455	2513.35	3	4.48	90.18	-1.41	2
									cSNAGAEKSPLFAEVLGK	C1(Carbamidomethyl)	ASTE001809-PA;ASTE009459-PA	5	626.652	1877.94	3	4.3	52.07	-0.01	1
									IGENKYQVSWNEEIKK		ASTE001809-PA;ASTE009459-PA	5	492.009	1965.02	4	3.52	28.9	3.99	2
									KASSGSYAVR		ASTE001809-PA;ASTE009459-PA	1	513.271	1025.54	2	2.9	53.21	-1.97	1
									AGEDIQSVKPLTTVTVSFPGAYK		ASTE001809-PA;ASTE009459-PA	12	803.43	2408.28	3	0.94	10.48	1.81	0
									LFDEESYAAVR		ASTE001809-PA;ASTE009459-PA	28	650.314	1299.62	2	2.73	70.78	-0.83	0
									YQVSWNEEIKK		ASTE001809-PA;ASTE009459-PA	31	475.246	1423.72	3	2.1	50.66	0.69	1
ASTE006377-PA	19.47	2	2		113	11.864	6.35	Midgut,Brain
									QLQEVGDEEASSK		ASTE006377-PA	3	710.334	1419.66	2	3.29	60.04	0.93	0
									DSVAPVIVK		ASTE006377-PA	1	464.278	927.549	2	1.89	29.26	-1.64	0
ASTE008766-PA	10.91	6	6		871	97.411	8.9	Fatbody,Midgut,Ovary
									VSDDPDTKEGDEHGSDYQK		ASTE008766-PA	1	531.227	2121.89	4	3.23	16.26	0.81	1
									DLFKPFGDIK		ASTE008766-PA	1	590.326	1179.64	2	2.43	20.27	2.7	0
									QLFAPFGLLGR		ASTE008766-PA	1	609.858	1218.71	2	2.49	51.63	7.08	0
									ANASGEAIcESGK	C9(Carbamidomethyl)	ASTE008766-PA	1	647.29	1293.57	2	3.27	65.99	-0.95	0
									ALFEQYGPVTEVDVPIDSVTR		ASTE008766-PA	3	1168.1	2335.2	2	4.16	76.78	6.68	0
									EEKPDLVDDTEPEDGTTLFIR		ASTE008766-PA	1	807.058	2419.16	3	5.96	42.25	3.6	0
ASTE008446-PA	42.86	3	3	8	77	8.88	10.81	Brain,Salivary glands
									IILEMAR		ASTE008446-PA	3	423.249	845.491	2	1	47.15	-0.01	0
									TKPSLSIVNPLDVLR		ASTE008446-PA	4	551.331	1651.98	3	3.99	63.36	1.89	0
									MVQENSLLSLK		ASTE008446-PA	1	631.344	1261.68	2	1.58	55.9	-0.82	0
ASTE007046-PA	22.18	9	9		532	59.264	7.27	Proboscis,Fatbody,Thorax,Midgut,Brain,Male accessory glands,Antennaex,Ovary,Salivary glands,Malpighian tubules
									LGQTIPELPEQTR		ASTE007046-PA	4	741.4	1481.79	2	1.25	35.37	-1.54	0
									SKLFSGAR		ASTE007046-PA	1	433.248	865.489	2	2.05	27.81	-0.29	1
									AVAQAVDYEIQR		ASTE007046-PA	7	681.854	1362.7	2	2.03	70.98	-0.39	0
									LHQLQLEQDSGK		ASTE007046-PA	4	698.366	1395.72	2	2.85	65.77	1.56	0
									MLYALAGEIAK		ASTE007046-PA	1	590.325	1179.64	2	2.27	62.12	-2.12	0
									GGALSFPVFVPGVTK		ASTE007046-PA	4	738.416	1475.82	2		36.69	-1.18	0
									AGIPLMELVFEPDLETGEEAAALVK		ASTE007046-PA	1	881.461	2642.37	3		99.44	1.94	0
									FMPEPNLPPLHLK		ASTE007046-PA	1	511.615	1532.83	3	2.85	32.43	0.74	0
									DKEVVQDYR		ASTE007046-PA	1	384.528	1151.57	3	2.22	36.27	0.99	1
ASTE008937-PA	16.85	29	29		2225	252.146	5.8	Proboscis,Legs,Larvae,Maxillary palps,Haemolymph,Antennaex,Pupa,Testis
									FAALKDQYPHLK		ASTE008937-PA	3	477.598	1430.78	3		43.24	-0.42	1
									KWDDVGLcPYTYK	C8(Carbamidomethyl)	ASTE008937-PA	1	822.891	1644.78	2	3.79	70.36	1.29	1
									LFDTGALK		ASTE008937-PA	2	432.744	864.48	2		49.56	-3.04	0
									LVcYFTNWSPDR	C3(Carbamidomethyl)	ASTE008937-PA	1	779.362	1557.72	2		75.53	1.24	0
									IVLGVPLFGR		ASTE008937-PA	10	535.84	1070.67	2	2.1	65.28	1.28	0
									LFDTGALKDLNVK		ASTE008937-PA	3	478.603	1433.79	3	3.44	71.88	-4.66	1
									GGAVEDKDTFLYLVSELAK		ASTE008937-PA	11	685.694	2055.07	3	5.12	31.91	1.63	1
									YGFDGIELVWLYPGSVER		ASTE008937-PA	1	1050.53	2100.05	2		75.14	1.98	0
									LVVGVPFYGR		ASTE008937-PA	6	553.822	1106.64	2		43.01	1.04	0
									VANYVYVTGYDLR		ASTE008937-PA	3	766.888	1532.77	2	2.77	44.73	-4.02	0
									GWEITMAVPVANFR		ASTE008937-PA	1	795.909	1590.81	2	2.32	34.39	1.04	0
									GGNPADKDNFYYLVK		ASTE008937-PA	2	567.615	1700.83	3		60.71	1.58	1
									GNWAGFADVHSPLYK		ASTE008937-PA	1	554.608	1661.81	3		38.37	1.45	0
									VVLGVPFLGR		ASTE008937-PA	1	528.832	1056.66	2		53.3	-0.18	0
									GSWNGFTDVHSPmNNR	M13(Oxidation)	ASTE008937-PA	1	917.899	1834.79	2		49.13	-0.79	0
									TYTLENSEQHGLAAPITGPGNPGPYTTEAGYR		ASTE008937-PA	1	1121.53	3362.58	3	8.48	57	-2.76	0
									VTLGVALFGR		ASTE008937-PA	3	516.807	1032.61	2		22.65	-12	0
									QSPWTIDWDER		ASTE008937-PA	1	716.828	1432.65	2		56.97	-1.03	0
									mAEAPYVHR	M1(Oxidation)	ASTE008937-PA	1	545.261	1089.52	2		61.38	0.05	0
									KYDILQQGYEK		ASTE008937-PA	1	692.862	1384.72	2		66.13	4.32	1
									IDLGYHQSQLcR	C11(Carbamidomethyl)	ASTE008937-PA	1	745.363	1489.72	2		67.28	-2.33	0
									GGTTSDKDNLYLLIAELR		ASTE008937-PA	4	660.354	1979.05	3		41.6	1.69	1
									NQFIGSVVK		ASTE008937-PA	1	496.281	991.555	2		37.46	-1.88	0
									EVFIASVIEFLK		ASTE008937-PA	1	697.9	1394.79	2	1.63	37.59	-0.11	0
									GScGEPFPLTR	C3(Carbamidomethyl)	ASTE008937-PA	1	610.79	1220.57	2		47.48	-0.88	0
									GTQFVGYEDEK		ASTE008937-PA	1	636.791	1272.57	2	2.4	40.56	0.05	0
									LDGIELVWLYPGNFDR		ASTE008937-PA	2	953.988	1906.97	2	3.11	41.2	-1.01	0
									ADAHSILR		ASTE008937-PA	1	441.742	882.476	2		46.11	-3.59	0
									KFcPPDDEQDFALFR	C3(Carbamidomethyl)	ASTE008937-PA	1	942.931	1884.86	2		69.49	-1.57	1
ASTE007930-PA	51.61	17	17	58	403	45.722	7.83	Proboscis,Brain,Fatbody,Midgut,Male accessory glands,Testis
									YLLLDDSK		ASTE007930-PA	2	483.762	966.516	2	1.69	49.96	1.7	0
									FHTLDQLVDHYQR		ASTE007930-PA	1	418.711	1671.82	4	1.87	29.8	-1.28	0
									KFHTLDQLVDHYQR		ASTE007930-PA	3	600.646	1799.92	3	7.16	73.24	2.17	1
									SQcDTVLNSHGHDGDYLIR	C3(Carbamidomethyl)	ASTE007930-PA	1	729.67	2186.99	3	5.3	46.32	2.6	0
									NQSGYVPSNYVK		ASTE007930-PA	5	678.333	1355.66	2	2.48	35.31	-0.67	0
									QEDVcYVVAK	C5(Carbamidomethyl)	ASTE007930-PA	3	605.793	1210.58	2	1.4	41.93	0.72	0
									SVSLFDSFK		ASTE007930-PA	3	515.268	1029.53	2	1.95	53.25	2.62	0
									YNYQAQQQDELSLTK		ASTE007930-PA	5	914.941	1828.88	2	2.44	55.91	2.36	0
									NNNGQIGLVPR		ASTE007930-PA	2	591.323	1181.64	2	2.35	84.57	0.51	0
									DSETNLGDYSVSLK		ASTE007930-PA	6	764.362	1527.72	2	2.64	67.14	-0.74	0
									VHVEGNMYcIGQR	C9(Carbamidomethyl)	ASTE007930-PA	2	521.577	1562.72	3	2.17	31.66	-1.95	0
									aGSIKQEDVcYVVAK	N-Term(Acetyl); C10(Carbamidomethyl)	ASTE007930-PA	3	854.935	1708.86	2		51.99	3.47	1
									YDYEAQGAQELDLR		ASTE007930-PA	4	835.886	1670.77	2	2.06	74.71	-0.39	0
									SWYYGAITR		ASTE007930-PA	5	558.778	1116.55	2	2.03	36.41	0.76	0
									SVSLFDSFKK		ASTE007930-PA	1	579.314	1157.62	2	2.49	33.46	0.22	1
									LYLVRPLPK		ASTE007930-PA	2	549.855	1098.7	2	2.09	48.63	0.11	0
									NYLQELSEYLAQPFR		ASTE007930-PA	10	935.971	1870.93	2	1.92	15.74	0.63	0
ASTE001378-PA	37.91	13	13		306	34.707	6.65	Proboscis,Fatbody,Maxillary palps,Midgut,Brain,Antennaex,Ovary,Salivary glands,Malpighian tubules
									NTFVMLYR		ASTE001378-PA	4	522.272	1043.54	2	2.31	42.26	1.8	0
									VPVGGQADSSASSNSTTSTLK		ASTE001378-PA	12	997.488	1993.97	2	2.38	99.43	0.48	0
									YTTVESSPEGTFK		ASTE001378-PA	14	723.354	1445.7	2		72.23	15.35	0
									TYLEYQR		ASTE001378-PA	5	486.745	972.482	2		47.3	3.36	0
									IDcTEEmHQVLR	C3(Carbamidomethyl); M7(Oxidation)	ASTE001378-PA	1	773.852	1546.7	2	3.29	69.62	-1.27	0
									IDcTEEMHQVLR	C3(Carbamidomethyl)	ASTE001378-PA	5	510.906	1530.7	3	3.74	46.39	0.01	0
									sEQTESNIVK	N-Term(Acetyl)	ASTE001378-PA	2	588.788	1176.57	2		44.23	-3.98	0
									TQFESVISIR		ASTE001378-PA	7	590.322	1179.64	2		36.63	0.23	0
									YNIYSIAK		ASTE001378-PA	8	486.271	971.535	2		49.68	16.24	0
									VPVGGQADSSASSNSTTSTLKL		ASTE001378-PA	3	1054.03	2107.05	2	6.69	126.53	-0.05	1
									SLEHWIEGK		ASTE001378-PA	5	549.782	1098.56	2	1.57	37.27	-0.86	0
									EVAEETNIR		ASTE001378-PA	3	530.768	1060.53	2	2.9	53.87	0.85	0
									MSEQTESNIVK		ASTE001378-PA	4	633.305	1265.6	2	1.53	31.16	-0.64	0
ASTE006059-PA	6.91	2	2	5	376	40.033	6.87	Brain
									QHISTIDTNSPSR		ASTE006059-PA	4	728.364	1455.72	2	3.19	60.16	1.67	0
									RQHISTIDTNSPSR		ASTE006059-PA	1	537.945	1611.82	3	6.25	81.38	-0.05	1
ASTE003329-PA	42.88	25	25	96	702	74.615	8.31	Proboscis,Legs,Fatbody,Maxillary palps,Midgut,Brain,Haemolymph,Male accessory glands,Antennaex,Ovary,Salivary glands,Testis,Malpighian tubules
									QEQLSSNIMLK		ASTE003329-PA	1	645.838	1290.67	2	2.07	59.17	-2.35	0
									TEQGEQTAEQTEEmKQELEEQTNR	M14(Oxidation)	ASTE003329-PA	6	961.428	2882.27	3	5.82	73.63	3.29	1
									ANESDTVLNLK		ASTE003329-PA	6	602.316	1203.62	2	3.32	59.46	2.25	0
									AImEPNFSDTYAQLcK	M3(Oxidation); C15(Carbamidomethyl)	ASTE003329-PA	2	952.438	1903.87	2	3.69	90.57	6.77	0
									TEQGEQTAEQTEEMK		ASTE003329-PA	2	869.873	1738.74	2	2.64	78.26	-2.94	0
									ILLPNGEPVcNR	C10(Carbamidomethyl)	ASTE003329-PA	1	691.371	1381.73	2	2.46	66.79	7.01	0
									LTPENFNVLKDQIK		ASTE003329-PA	6	553.642	1658.91	3		55.27	0.71	1
									LTPENFNVLK		ASTE003329-PA	4	587.827	1174.65	2	1.14	23.31	0.06	0
									GMGFGGPPGAGEGADGAR		ASTE003329-PA	6	780.849	1560.69	2	2.23	89.66	2.58	0
									TEQGEQTAEQTEEMKQELEEQTNR		ASTE003329-PA	5	956.091	2866.26	3	2.96	87.36	-1.64	1
									GmGFGGPPGAGEGADGAR	M2(Oxidation)	ASTE003329-PA	4	788.844	1576.68	2	3.57	72.15	0.36	0
									LNEDAVSGGR		ASTE003329-PA	1	509.252	1017.5	2	2.6	59.31	0.3	0
									aTDSGDVATALAQQQPAVAEK	N-Term(Acetyl)	ASTE003329-PA	2	1057.03	2113.06	2		16.34	7.25	0
									SSPGTFVSSGR		ASTE003329-PA	2	541.268	1081.53	2	1.84	35.88	0.98	0
									YSLDMLMSLK		ASTE003329-PA	2	600.81	1200.61	2	1.96	57.32	10.61	0
									VNLNITEEVK		ASTE003329-PA	11	579.821	1158.63	2	3.21	38.45	-1.8	0
									IELLVAEPLAK		ASTE003329-PA	1	598.368	1195.73	2	1.99	76.5	-1.07	0
									ANESDTVLNLKR		ASTE003329-PA	5	453.912	1359.72	3	3.84	33.86	-0.84	1
									EVEAEENKNWMLNYK		ASTE003329-PA	1	948.944	1896.88	2	2.75	77.45	0.75	1
									FIGALFK		ASTE003329-PA	20	398.241	795.475	2		41.91	-1.78	0
									QLISQcQVEFEK	C6(Carbamidomethyl)	ASTE003329-PA	3	754.881	1508.75	2	2.55	31.63	8.47	0
									AIMEPNFSDTYAQLcK	C15(Carbamidomethyl)	ASTE003329-PA	2	944.433	1887.86	2	2.05	42.3	-1.49	0
									RALGTIR		ASTE003329-PA	1	393.75	786.494	2		31.27	-1.24	1
									FMIMDLLDLRK		ASTE003329-PA	1	465.593	1394.76	3	4.46	55.74	7.34	1
									GGGGGVNIGGQDNSLLPSFMK		ASTE003329-PA	1	1003	2004.99	2	0.96	32.83	3.29	0
ASTE003658-PA	15.55	15	15	31	1408	155.341	6.35	Brain,Fatbody
									ASYHEELTTGAS		ASTE003658-PA	1	633.287	1265.57	2	2.11	28.08	2.15	0
									TTTPDESYGSVADR		ASTE003658-PA	1	749.836	1498.66	2	1.98	40.47	-0.55	0
									EQHFINAINFGIER		ASTE003658-PA	1	563.29	1687.85	3	2.44	39.62	-0.62	0
									FLYQLISR		ASTE003658-PA	2	520.303	1039.6	2	1.62	51.42	4.14	0
									AGNFIEESR		ASTE003658-PA	1	511.752	1022.5	2	1.59		6.94	0
									ccVSNSTTGSSLNK	C1(Carbamidomethyl); C2(Carbamidomethyl)	ASTE003658-PA	1	757.832	1514.66	2	3.45	48.13	-0.18	0
									HNSPSSNSLTVQHSHSTPSNR		ASTE003658-PA	6	569.271	2274.06	4	3.99	34.98	1.09	0
									SRHNSPSSNSLTVQHSHSTPSNR		ASTE003658-PA	2	630.055	2517.2	4	4.36	46.02	1.04	1
									VLFQNIDELSR		ASTE003658-PA	2	667.359	1333.71	2	2.43	61.57	0.46	0
									STLSPDELLHER		ASTE003658-PA	1	466.241	1396.71	3	2.33	55.1	0.82	0
									AVWQNLLTR		ASTE003658-PA	5	550.814	1100.62	2	1.94		-1.01	0
									ISEDILEQVIQDETEPQIHFASR		ASTE003658-PA	2	899.789	2697.35	3	7.62	66.63	5.56	0
									FITEPPVPR		ASTE003658-PA	4	528.298	1055.59	2	2.03	18.21	0.31	0
									LALNHDILGDEDLLTYSPGPDLTAILGR		ASTE003658-PA	1	998.195	2992.57	3	6.43	64.75	2.52	0
									QVEELIDEK		ASTE003658-PA	1	551.787	1102.57	2	1.33	41.47	3.4	0
ASTE009384-PA	40.69	6	6	30	145	16.582	6.99	Antennaex
									FGDEDIFDDDRALK		ASTE009384-PA	1	552.59	1655.76	3	5.16	35.56	0.85	1
									DAAYPPPEMLAFLKPFGALcVK	C20(Carbamidomethyl)	ASTE009384-PA	3	812.419	2435.24	3	3.63	24.26	-2.84	0
									LLDHVPHEFEDIALK		ASTE009384-PA	10	888.47	1775.93	2	3.44	39.48	-0.39	0
									FGDEDIFDDDR		ASTE009384-PA	11	672.274	1343.54	2	3.16	83.13	2.22	0
									RFGDEDIFDDDR		ASTE009384-PA	3	750.321	1499.64	2	4.44	72.53	-2.76	1
									RDAAYPPPEMLAFLKPFGALcVK	C21(Carbamidomethyl)	ASTE009384-PA	2	864.459	2591.36	3	7.31	39.41	4.45	1
ASTE006964-PA	1.95	4	4	5	2508	264.302	6.55	Fatbody,Midgut
									EIIQMPEQLTEAER		ASTE006964-PA	1	843.923	1686.84	2	2.86	83.31	1.61	0
									LIQEQGISLR		ASTE006964-PA	1	578.838	1156.67	2	2.51	57.58	-0.1	0
									TNATTYSEAVQSR		ASTE006964-PA	2	714.342	1427.68	2	3.32	83.89	0.2	0
									VTSTMQYDDSTR		ASTE006964-PA	1	702.307	1403.61	2	2.51	89.59	-2.71	0
ASTE004335-PA	17.54	5	5	16	399	44.919	9.04	Legs,Brain,Midgut
									AMVASLNDPGR		ASTE004335-PA	4	565.785	1130.56	2	1.08	33.61	1.05	0
									FIIAFVYR		ASTE004335-PA	2	343.535	1028.59	3	1.63	25.53	-1.66	0
									EVDTGHYGDDGGGPK		ASTE004335-PA	4	752.322	1503.64	2	5.31	95.63	0.8	0
									LLQPDGPQTPNEESSLR		ASTE004335-PA	4	627.65	1880.94	3	2.13	45.78	0.61	0
									VPPDAPVPVQTTNTQHDPK		ASTE004335-PA	2	681.016	2041.03	3	2.14	38.48	-0.5	0
ASTE001755-PA	27.46	8	8		284	32.16	9.79	Proboscis,Fatbody,Midgut,Brain,Male accessory glands,Antennaex,Ovary,Salivary glands,Malpighian tubules
									LGLPVQR		ASTE001755-PA	8	391.749	782.491	2		33.46	3.96	0
									LTHELIAQLK		ASTE001755-PA	3	389.236	1165.69	3	2.51	40.63	-0.71	0
									TFLLKDPVGGWK		ASTE001755-PA	1	680.884	1360.76	2	3.15	49.32	-0.84	1
									mEQYAIPNKLPSEEVSVLTHR	N-Term(Acetyl); M1(Oxidation)	ASTE001755-PA	3	833.757	2499.26	3		67.2	0.79	1
									LPSEEVSVLTHR		ASTE001755-PA	2	456.249	1366.73	3	2.02	77.76	-0.5	0
									VGPHFDAIR		ASTE001755-PA	1	506.271	1011.53	2	3.11	42	-2.41	0
									ENQLVLVYR		ASTE001755-PA	4	567.319	1133.63	2	1.76	53.26	0.02	0
									KVNTFVAHSR		ASTE001755-PA	2	386.885	1158.64	3	4.02	67.38	1.15	1
ASTE007329-PA	33.84	6	6	12	263	29.779	6.23	Midgut,Brain,Haemolymph,Salivary glands
									YSQAAAANEDHDLSGEFSSFISR		ASTE007329-PA	1	834.711	2502.12	3	2.79	50.16	0.4	0
									LVMTVATLYGR		ASTE007329-PA	2	612.344	1223.68	2	1.6	68.91	-0.82	0
									TTYSDITIK		ASTE007329-PA	2	521.277	1041.55	2	0.91	26.15	0.02	0
									SEEWREEVLMDK		ASTE007329-PA	2	517.577	1550.72	3	1.73	12.85	0.11	1
									LLKEEYTK		ASTE007329-PA	3	512.29	1023.57	2	1.67		0.66	1
									TKHPLHAAVR		ASTE007329-PA	2	377.225	1129.66	3		16.4	1.68	1
ASTE007190-PA	11.74	11	11	17	1269	141.272	7.87	Proboscis,Legs,Fatbody,Maxillary palps,Haemolymph
									DYNPVMYTTDIGLLR		ASTE007190-PA	1	885.943	1770.88	2	3.95	63.16	2.86	0
									DGVISNVLNYLEVPVVSQK		ASTE007190-PA	2	1037.06	2073.11	2		30.37	-4.18	0
									IGLVPGWGYNEHGLVSSR		ASTE007190-PA	1	647.665	1940.98	3		55.3	-8.6	0
									TADEVIIHR		ASTE007190-PA	1	527.289	1053.57	2		70.65	0.92	0
									IPLEVSYTSAIKPTIVR		ASTE007190-PA	1	944.05	1887.09	2		52.22	-1.31	0
									TSPcPAVFSYDER	C4(Carbamidomethyl)	ASTE007190-PA	2	764.84	1528.67	2	2.76	75.1	-1.1	0
									ANPLVTHGTVSER		ASTE007190-PA	4	690.866	1380.72	2	3.78	49.57	1.51	0
									YAPDRPVPLLR		ASTE007190-PA	2	432.919	1296.74	3		28.93	-0.68	0
									YITRPTSTTTER		ASTE007190-PA	1	475.916	1425.73	3	2.48	27.49	0.41	0
									FFNDIAVLVLK		ASTE007190-PA	1	639.881	1278.76	2	2.41	44.29	7.79	0
									FNGQNIcTETR	C7(Carbamidomethyl)	ASTE007190-PA	1	670.306	1339.61	2	3.77	40.24	-0.52	0
ASTE006949-PA	75.62	28	28	422	402	43.965	8.37	Proboscis,Legs,Brain,Larvae,Fatbody,Head,Malpighian tubules,Maxillary palps,Thorax,Midgut,Testis,Haemolymph,Male accessory glands,Antennaex,Ovary,Pupa,Salivary glands
									HmELNQQADKIQNAcFETIK	M2(Oxidation); C15(Carbamidomethyl)	ASTE006949-PA	13	812.053	2434.15	3	4.93	34.98	-1.32	1
									IYITSSTSSSSTASTANTK		ASTE006949-PA	3	953.968	1906.93	2	4.41	96.07	2.4	0
									KVTVVHK		ASTE006949-PA	3	405.763	810.519	2	2.3	27.1	-0.59	1
									LITEEASNRVAEYAFK		ASTE006949-PA	2	920.976	1840.94	2	4.56	89.78	-0.07	1
									IQNAcFETIKEAK	C5(Carbamidomethyl)	ASTE006949-PA	3	517.933	1551.79	3		45.23	0.73	1
									DmAQKYPEIK	M2(Oxidation)	ASTE006949-PA	2	413.541	1238.61	3	2.22	20.43	0.94	1
									HMELNQQADKIQNAcFETIK	C15(Carbamidomethyl)	ASTE006949-PA	17	806.724	2418.16	3		81.15	0.83	1
									cSEYTNAIcDR	C1(Carbamidomethyl); C9(Carbamidomethyl)	ASTE006949-PA	14	694.786	1388.56	2		93.61	5.07	0
									VAEYAFKYAK		ASTE006949-PA	1	595.316	1189.62	2	3.38	42.99	-0.15	1
									HMELNQQADKIQNAcFETIKEAK	C15(Carbamidomethyl)	ASTE006949-PA	1	916.122	2746.35	3	6.48	27.99	8.31	2
									HMELNQQADK		ASTE006949-PA	11	607.286	1213.57	2	2.44	61.78	1.4	0
									WLTGDLGGK		ASTE006949-PA	33	473.754	946.5	2		32.72	0.58	0
									TDPIVQTGAPFGAR		ASTE006949-PA	1	715.374	1429.74	2	1.44	30.39	-1.55	0
									HmELNQQADK	M2(Oxidation)	ASTE006949-PA	4	615.283	1229.56	2	3.78	80.01	1.14	0
									ILDGEYGTLLAK		ASTE006949-PA	1	646.859	1292.71	2		46.28	0.24	0
									KEFNLYANVRPcR	C12(Carbamidomethyl)	ASTE006949-PA	9	556.291	1666.86	3	2.27		5.36	1
									ENTEGEYSGIEHEIVDGVVQSIKLITEEASNR		ASTE006949-PA	1	887.187	3545.73	4	1.38		0.94	1
									GPLMTPVGKGHR		ASTE006949-PA	1	417.232	1249.68	3	2.82	54.93	-0.75	1
									DMAQKYPEIKFEER		ASTE006949-PA	14	595.296	1783.87	3	5.57	47.94	2.74	2
									IQNAcFETIK	C5(Carbamidomethyl)	ASTE006949-PA	53	612.309	1223.61	2		61.24	1.2	0
									VAEYAFK		ASTE006949-PA	26	414.218	827.43	2	1.87	37.82	-0.31	0
									IFAVANVPIEWETVDVTPVR		ASTE006949-PA	183	1128.11	2255.21	2	5.01	103.64	0.18	0
									NKVGLKGPLmTPVGK	M10(Oxidation)	ASTE006949-PA	1	518.973	1554.9	3	4.33	46.03	0.17	2
									TLYDNVDVVTIRENTEGEYSGIEHEIVDGVVQSIK		ASTE006949-PA	13	980.989	3920.93	4	3.72		-1.57	1
									GPLmTPVGKGHR	M4(Oxidation)	ASTE006949-PA	1	422.564	1265.68	3	3.34	40.44	0.05	1
									DmAQKYPEIKFEER	M2(Oxidation)	ASTE006949-PA	4	900.433	1799.86	2	4.3	94.26	-2.32	2
									DMAQKYPEIK		ASTE006949-PA	4	611.813	1222.62	2		33.43	4.9	1
									NKVGLKGPLMTPVGK		ASTE006949-PA	3	769.959	1538.91	2	4.51	70.02	1.71	2
ASTE008164-PA	83.29	34	34	815	401	46.197	9.01	Proboscis,Legs,Brain,Larvae,Fatbody,Head,Malpighian tubules,Maxillary palps,Thorax,Midgut,Testis,Haemolymph,Male accessory glands,Antennaex,Ovary,Pupa,Salivary glands
									LKLVGDLGQVLFHPYDLR		ASTE008164-PA	2	695.063	2083.17	3	5	32.91	1.43	1
									NFTFKDVHVDGARR		ASTE008164-PA	3	416.22	1661.86	4		16.87	4.25	2
									TTNLAAMKR		ASTE008164-PA	6	335.855	1005.55	3	3.82	42.21	0.91	1
									YSNVVINLVGRDWETK		ASTE008164-PA	65	631.666	1892.98	3		36.04	-1.04	1
									AMPLWYKGER		ASTE008164-PA	11	625.821	1250.63	2	1.87	44.83	0.16	1
									GVPTLEDLGVNLTYmEDQVPWELRPYR	M15(Oxidation)	ASTE008164-PA	18	1069.53	3206.58	3		20.02	-1.47	0
									IKTTNLAAMK		ASTE008164-PA	2	545.817	1090.63	2	1.57	46.28	-1.23	1
									TTNLAAMK		ASTE008164-PA	5	425.229	849.451	2	2.06	38.74	1.18	0
									LSALVDWFHQVmRK	M12(Oxidation)	ASTE008164-PA	1	582.642	1745.91	3	5.13	42.34	-2.78	1
									QPVYcSDLAQGIVNAIKDSDSQGQTYQAVGPR	C5(Carbamidomethyl)	ASTE008164-PA	4	1155.89	3465.67	3		39.9	-0.41	1
									DEKWWGYYR		ASTE008164-PA	1	651.798	1302.59	2	2.53	21.97	-1.01	1
									TTNLAAmK	M7(Oxidation)	ASTE008164-PA	7	433.226	865.445	2	2.08	47.38	0.26	0
									TIKQPVYcSDLAQGIVNAIK	C8(Carbamidomethyl)	ASTE008164-PA	29	740.069	2218.19	3	5.95	73.57	1.01	1
									YKLSALVDWFHQVMR		ASTE008164-PA	2	631.667	1892.98	3		44.37	0.57	1
									VLLTEmLSPSFPIGDVHTER	M6(Oxidation)	ASTE008164-PA	76	753.057	2257.16	3	4.98	58.95	1.68	0
									YDPTFRVKVLLTEMLSPSFPIGDVHTER		ASTE008164-PA	1	812.677	3247.69	4	5.89	38.8	1.54	2
									IGSQVIIPYRADHYEALR		ASTE008164-PA	9	701.045	2101.12	3		13.64	0.15	1
									LVGDLGQVLFHPYDLRDEEAIYK		ASTE008164-PA	81	673.353	2690.39	4		10.83	2.42	1
									VLLTEMLSPSFPIGDVHTER		ASTE008164-PA	109	747.726	2241.16	3	4.9	52.29	1.66	0
									TTNLAAmKR	M7(Oxidation)	ASTE008164-PA	5	341.187	1021.55	3	2.81	40.31	0.79	1
									ADHYEALR		ASTE008164-PA	2	487.738	974.469	2	2.15	13.04	-0.32	0
									EEFPEAIVFRPSDIYGQEDR		ASTE008164-PA	67	799.716	2397.13	3	3.2	11.95	-0.84	0
									FVHVSSLNATPNPQPFFTKEGSKFLQSK		ASTE008164-PA	1	784.662	3135.62	4	6.45	52.47	-0.61	2
									LVGDLGQVLFHPYDLR		ASTE008164-PA	53	614.669	1841.99	3		43.63	0.34	0
									YSNVVINLVGR		ASTE008164-PA	76	617.352	1233.7	2		59.7	0.95	0
									VLLTEMLSPSFPIGDVHTERVER		ASTE008164-PA	1	875.798	2625.38	3	3.69	26.29	3.05	1
									DSDSQGQTYQAVGPR		ASTE008164-PA	90	804.87	1608.73	2		16.15	5.08	0
									EYVSDEVQK		ASTE008164-PA	29	548.761	1096.52	2		49.82	-0.05	0
									VEREYVSDEVQK		ASTE008164-PA	2	494.248	1480.73	3	3.84	38.08	0.29	1
									GVPTLEDLGVNLTYMEDQVPWELRPYR		ASTE008164-PA	35	1064.2	3190.58	3		39.13	-2.19	0
									NFTFKDVHVDGAR		ASTE008164-PA	12	502.589	1505.75	3		35.08	2.16	1
									IKTTNLAAmK	M9(Oxidation)	ASTE008164-PA	1	553.815	1106.62	2	2.22	93.24	-0.48	1
									VLLTEmLSPSFPIGDVHTERVER	M6(Oxidation)	ASTE008164-PA	2	661.095	2641.36	4	5.01	27.73	-2.74	1
									AmPLWYKGER	M2(Oxidation)	ASTE008164-PA	7	633.818	1266.63	2	2.1	35.96	-1.71	1
ASTE010937-PA	12.33	10	10	17	949	104.158	4.59	Fatbody,Brain
									DSFAVIR		ASTE010937-PA	2	404.221	807.435	2	1.1		-0.69	0
									DVNNHAPQFAR		ASTE010937-PA	2	634.81	1268.61	2	3.94	46.78	0.46	0
									ARDPDVVSEINYR		ASTE010937-PA	2	511.927	1533.77	3	1.7	39.33	0.75	1
									ASVDEGASVFEPPLIIR		ASTE010937-PA	2	900.48	1799.95	2	4.63	69.53	-0.33	0
									ENYLTSIEENFPIGTIVER		ASTE010937-PA	1	1112.56	2224.11	2	4.74	54.61	-2.07	0
									SVALDVNHLK		ASTE010937-PA	1	365.876	1095.62	3	1.45	25.98	-0.9	0
									QPLDYNDR		ASTE010937-PA	1	510.742	1020.48	2	2.23		2.52	0
									DLDSGLYGDQGIR		ASTE010937-PA	1	704.839	1408.67	2	2.17	68.45	0.16	0
									IIGNEAVTR		ASTE010937-PA	3	486.777	972.548	2	2.68	65.82	0.22	0
									APYFTPTTQR		ASTE010937-PA	2	591.303	1181.6	2	1.23	36.84	2.61	0
ASTE007727-PA	27.54	1	1	128	138	14.283	10.27	Legs,Thorax,Midgut,Brain,Salivary glands
									FIGAGAATVGVAGSGAGIGTVFGSLIIGYAR		ASTE007727-PA	128	937.513	2810.52	3		48.61	1.16	0
ASTE005484-PA	6.8	1	1	2	250	28.23	6.13	Proboscis,Ovary
									EGSTTPLAANLIYGGSR		ASTE005484-PA	2	853.942	1706.88	2	3.57	88.3	3.53	0
ASTE005273-PA	17.5	14	14		937	102.488	6.13	Fatbody,Midgut,Brain,Salivary glands
									NTPEITDEAR		ASTE005273-PA	1	573.275	1145.54	2	2.09	35.77	-1.15	0
									DADVTYVPcSGLTGENLVK	C9(Carbamidomethyl)	ASTE005273-PA	1	1019.49	2037.98	2	3.6	61.81	-0.09	0
									VLVcPSK	C4(Carbamidomethyl)	ASTE005273-PA	1	401.728	802.449	2	1.75	34.38	-0.57	0
									VLVcPSKEQAVVK	C4(Carbamidomethyl)	ASTE005273-PA	1	728.913	1456.82	2	3.43	53.08	-0.35	1
									SLGVSQLGVVVNK		ASTE005273-PA	2	650.385	1299.76	2	2.19	59.87	0.16	0
									DIVGETcSDR	C7(Carbamidomethyl)	ASTE005273-PA	1	576.253	1151.5	2	2.31	46.81	-1.04	0
									GYPVLLHHQSLIEPATIR		ASTE005273-PA	1	682.049	2044.13	3	1.88	64.66	-1.23	0
									GITMDVGSTR		ASTE005273-PA	1	518.758	1036.51	2	2.13	29.59	-0.15	0
									LLScMDEIRDIVGETcSDR	C4(Carbamidomethyl); C16(Carbamidomethyl)	ASTE005273-PA	1	757.013	2269.02	3	3	35.91	-0.62	1
									EITLLDAPGHK		ASTE005273-PA	3	597.33	1193.65	2	1.88	45.81	-0.01	0
									DPTDLGLIQWYDGPTLLK		ASTE005273-PA	1	1023.03	2045.06	2	2.61	59.17	-0.33	0
									IESGMVcVNDK	C7(Carbamidomethyl)	ASTE005273-PA	1	626.288	1251.57	2	2.49	76.05	-1.08	0
									LLScMDEIR	C4(Carbamidomethyl)	ASTE005273-PA	1	568.775	1136.54	2	1.57	77.43	-1.1	0
									GEFETGFEQGGQTR		ASTE005273-PA	4	771.844	1542.68	2	2.91	42.57	-1.07	0
ASTE002001-PA	1.08	1	1		743	84.273	5.14	Midgut
									VLGNLELR		ASTE002001-PA	2	457.277	913.547	2		39.16	0.63	0
ASTE006356-PA	4.69	2	2		554	63.11	6.03	Ovary
									IVGPLIGTNVK		ASTE006356-PA	1	555.847	1110.69	2	2.6	45.2	-0.57	0
									ASLAcLVPAGNAWTR	C5(Carbamidomethyl)	ASTE006356-PA	1	793.913	1586.82	2	2.15	19.57	4.91	0
ASTE008963-PA	2.86	1	2	2	909	99.215	6.93	Brain
									TPGFGYPLR		ASTE005477-PA;ASTE008963-PA	1	504.268	1007.53	2	1.01	35.33	-1.33	0
									LIVLDPPREPYLLIDSR		ASTE008963-PA	1	670.386	2009.14	3	2.2		0.43	1
ASTE010234-PA	22.45	15	15	38	842	92.488	8.21	Fatbody,Thorax,Midgut,Testis,Malpighian tubules,Ovary,Salivary glands
									VLEQLLK		ASTE010234-PA	2	421.771	842.535	2	1.73	41.61	0.26	0
									SAMLDLLK		ASTE010234-PA	5	445.756	890.504	2	1.57	47.93	2.96	0
									VSFDQEEDRFDEDENSFR		ASTE010234-PA	1	755.316	2263.93	3	3.26	42.59	-1.43	1
									SAMLDLLKK		ASTE010234-PA	1	509.801	1018.6	2	2	34.33	-1.06	1
									KADVEPELK		ASTE010234-PA	2	514.784	1028.56	2	3.45	51.92	-0.96	1
									IDADITKPVIIDLK		ASTE010234-PA	2	518.644	1553.92	3	2.75	39.11	0.85	0
									VSFDQEEDRFDEDENSFRK		ASTE010234-PA	2	598.764	2392.03	4	2.91	19.71	0.25	2
									MSSVANIKPLSFNM		ASTE010234-PA	1	769.887	1538.77	2	1.29	27.33	-2.43	0
									ADTHVSFTVPAEEPVAK		ASTE010234-PA	7	899.454	1797.9	2	1.59		-0.17	0
									TAVPFVR		ASTE010234-PA	4	395.235	789.462	2	1.43	25.3	0.29	0
									SLEDIER		ASTE010234-PA	5	431.219	861.431	2	1.84	32.91	-0.24	0
									ADVEPELK		ASTE010234-PA	2	450.738	900.468	2	1.77	36.61	0.6	0
									SAmLDLLK	M3(Oxidation)	ASTE010234-PA	1	453.753	906.499	2	2.73	45.02	2.66	0
									TFSPILETDDTNPFLEAGEK		ASTE010234-PA	2	1112.53	2224.06	2	3.6	94.74	-1.85	0
									ALSGLcVGIASLSLPVYLGETVQPEVR	C6(Carbamidomethyl)	ASTE010234-PA	1	943.513	2828.52	3		82.23	0.2	0
ASTE002126-PA	18.02	4	4	17	283	31.373	4.74	Proboscis,Maxillary palps,Malpighian tubules
									TIYQTGNNIVHEESGYLK		ASTE002126-PA	2	689.345	2066.02	3		21.64	0.59	0
									SIRVPKLDDTGR		ASTE002126-PA	9	452.925	1356.76	3	3.11	32.34	1.1	2
									VEDQGAIK		ASTE002126-PA	5	430.23	859.453	2		55.34	0.91	0
									RAQLDYNGQYYNQ		ASTE002126-PA	1	816.87	1632.73	2		51.11	-4.24	1
ASTE004023-PA	34.79	17	17	34	595	67.57	9.33	Fatbody,Midgut,Brain,Male accessory glands,Ovary,Salivary glands,Testis,Malpighian tubules
									LIQVPNIcPFK	C8(Carbamidomethyl)	ASTE004023-PA	2	664.873	1328.74	2	2.88	67.28	-0.47	0
									LYDISEFHSTDEFLAK		ASTE004023-PA	1	638.976	1914.91	3	3.87	50.95	0.75	0
									SFDcSPcIGADLLK	C4(Carbamidomethyl); C7(Carbamidomethyl)	ASTE004023-PA	1	791.865	1582.72	2	3.05	83.73	-1.25	0
									VGVVGLPNVGK		ASTE004023-PA	6	519.818	1038.63	2		49.03	-2.71	0
									RQDQFSPQTGEDDEYANVTGGGGK		ASTE004023-PA	1	852.712	2556.12	3	5.63	92.89	-1.24	1
									VTEIQDPFPLANDILK		ASTE004023-PA	5	907.002	1813	2	1.72		11.92	0
									EIIAEVEEYKQK		ASTE004023-PA	1	739.888	1478.77	2	3.29	63.37	-3.41	1
									VTEIQDPFPLANDILKR		ASTE004023-PA	1	657.03	1969.08	3	4.29	46.93	0.44	1
									SGPVIPFK		ASTE004023-PA	2	422.75	844.493	2	1.95	29.3	0.39	0
									EIIAEVEEYK		ASTE004023-PA	1	611.814	1222.62	2	1.34	49.13	1.16	0
									SDQLSTLTTEGTIIER		ASTE004023-PA	2	882.456	1763.9	2	2.19	74.08	1.83	0
									VVDAADVVLEVVDAR		ASTE004023-PA	4	785.427	1569.85	2		85.09	-1.04	0
									AcmVGAKPGVTK	C2(Carbamidomethyl); M3(Oxidation)	ASTE004023-PA	1	412.214	1234.63	3	3.79	55.42	-0.21	0
									ELLANYcR	C7(Carbamidomethyl)	ASTE004023-PA	1	519.754	1038.5	2	2.85	32.49	-2.25	0
									LLDSPGIVFQRPK		ASTE004023-PA	2	735.426	1469.85	2	3.19	60.56	-1.72	0
									VVDAADVVLEVVDARDPLGTR		ASTE004023-PA	1	737.065	2209.18	3	2.97	26.73	-0.56	1
									KVVDAADVVLEVVDAR		ASTE004023-PA	2	566.65	1697.93	3	0.96	33.76	-4.82	1
ASTE010146-PA	54.3	27	27	407	628	70.514	6.86	Proboscis,Legs,Fatbody,Head,Malpighian tubules,Maxillary palps,Thorax,Midgut,Brain,Testis,Haemolymph,Male accessory glands,Antennaex,Ovary,Pupa,Salivary glands
									DASVTVRPDWVTIEEMDFPR		ASTE010146-PA	8	788.382	2363.13	3	5.86	69.36	-0.41	0
									HVILGTQQFKPQEFANQINLSMDNAWGILR		ASTE010146-PA	2	1156.93	3468.79	3	3.45	32.06	1.61	0
									ISDWTGTAQTDKK		ASTE010146-PA	32	484.245	1450.72	3		39.84	2.15	1
									NLAIEATFINHNFSQQVLK		ASTE010146-PA	32	1094.08	2187.15	2	4.81	79.89	-2.43	0
									mPQGDTQFLTIK	M1(Oxidation)	ASTE010146-PA	10	697.852	1394.7	2	1.84	86.65	-1.46	0
									GAILANELR		ASTE010146-PA	31	478.779	956.55	2		55.83	-2.04	0
									EGEDImTcGTLEYYDK	M6(Oxidation); C8(Carbamidomethyl)	ASTE010146-PA	5	970.403	1939.8	2	3.52	81.39	2.69	0
									WDLNNGITLVAR		ASTE010146-PA	7	686.372	1371.74	2	4.09	78.26	-0.29	0
									GGVQVGGMTTLSK		ASTE010146-PA	2	617.827	1234.65	2	1.73	50.85	0.27	0
									MPQGDTQFLTIK		ASTE010146-PA	23	689.854	1378.7	2		75.61	-1.89	0
									IFHTVTTTDDPIIR		ASTE010146-PA	71	543.628	1628.87	3		36.25	3.36	0
									TQGNVYATDAILATIMccTR	C17(Carbamidomethyl); C18(Carbamidomethyl)	ASTE010146-PA	11	753.691	2259.06	3		44.43	0.16	0
									WTVQALLAGSDQLK		ASTE010146-PA	29	765.419	1529.83	2		76.68	-0.38	0
									KWDLNNGITLVAR		ASTE010146-PA	1	750.419	1499.83	2	3.7	98.82	-1	1
									EGEDIMTcGTLEYYDK	C8(Carbamidomethyl)	ASTE010146-PA	9	962.405	1923.8	2	4.28	79.56	1.72	0
									DASVTVRPDWVTIEEmDFPR	M16(Oxidation)	ASTE010146-PA	7	1190.07	2379.13	2	1.73	23.39	-0.7	0
									ISDWTGTAQTDK		ASTE010146-PA	9	661.814	1322.62	2	3.43	49.5	-1.55	0
									HVILGTQQFKPQEFANQINLSmDNAWGILR	M22(Oxidation)	ASTE010146-PA	1	1162.27	3484.79	3	6.19	47.92	2.26	0
									cIIDIcMK	C1(Carbamidomethyl); C6(Carbamidomethyl)	ASTE010146-PA	2	526.749	1052.49	2		33	-3.32	0
									SGEKEPK		ASTE010146-PA	1	387.703	774.399	2	2.39	33.18	-0.52	1
									SNYSWDIVIDK		ASTE010146-PA	17	670.328	1339.65	2		44.91	-2.39	0
									ALNEWDSK		ASTE010146-PA	2	481.733	962.458	2	1.92	55.11	0.04	0
									YKFDQPNPFIGDDEDGEVASVAYR		ASTE010146-PA	40	911.42	2732.25	3	7.16	99.83	-0.4	1
									IANAVEWR		ASTE010146-PA	27	479.761	958.514	2		27.61	3.38	0
									NERPLQSVDR		ASTE010146-PA	4	405.214	1213.63	3	3.48	49.15	0.07	0
									DIPYQPFSK		ASTE010146-PA	4	547.781	1094.56	2	1.06	41.65	2.75	0
									FDQPNPFIGDDEDGEVASVAYR		ASTE010146-PA	20	814.369	2441.09	3	2.01	43.83	0.79	0
ASTE004664-PA	80.45	26	30	570	491	52.701	5.47	Proboscis,Legs,Brain,Larvae,Fatbody,Head,Malpighian tubules,Maxillary palps,Thorax,Midgut,Testis,Haemolymph,Male accessory glands,Antennaex,Ovary,Pupa,Salivary glands
									KVSLELGGK		ASTE005677-PA;ASTE004664-PA	10	465.785	930.564	2		60.39	1.86	1
									TFVQEGIYDAFVAK		ASTE004664-PA	26	794.41	1587.81	2		53.91	4.89	0
									VAFTGSVETGR		ASTE004664-PA	52	562.292	1123.58	2		57.73	2.49	0
									EEIFGPVQSILK		ASTE005677-PA;ASTE004664-PA	13	680.379	1359.75	2	2.87		-1.37	0
									LILNGASTSNLKK		ASTE004664-PA	3	453.607	1358.81	3		50.55	4.55	1
									IHGSTVPSDGPVLSYIR		ASTE004664-PA	17	599.987	1797.94	3		53.5	-2.38	0
									SGTVGYFVEPTVFSNVTDEMKIAREEIFGPVQSILK		ASTE004664-PA	1	997.769	3988.05	4	4.28	26.23	2.87	2
									DIDTLANLESLDNGK		ASTE004664-PA	26	809.404	1617.8	2		63.05	2.25	0
									SGTVGYFVEPTVFSNVTDEmK	M20(Oxidation)	ASTE004664-PA	30	1162.04	2323.08	2	1.47		0.49	0
									WAPALAAGcTLVLKPAEQTPLSALHMAALSK	C9(Carbamidomethyl)	ASTE004664-PA	2	1072.91	3216.72	3		21.32	-2.53	0
									TFVTLNPATEKPIASVAEGDKDDVEVAVR		ASTE004664-PA	50	1024.54	3071.59	3		20.71	-0.2	1
									YYAGWADKIHGSTVPSDGPVLSYIR		ASTE004664-PA	15	688.849	2752.37	4		15.7	0.15	1
									VGDAFQEGVQQGPQVDQEQFTK		ASTE004664-PA	5	1218.08	2435.14	2	4.71	64.02	-1.09	0
									ELGYSGIELYLETK		ASTE004664-PA	14	807.921	1614.84	2		43.33	5.47	0
									SGTVGYFVEPTVFSNVTDEMK		ASTE004664-PA	36	1154.04	2307.08	2		63.56	-1.6	0
									VSLELGGK		ASTE005677-PA;ASTE004664-PA	30	401.737	802.467	2	1.37	26.56	0.03	0
									YYAGWADK		ASTE001371-PA;ASTE004664-PA	15	487.223	973.44	2		45.59	-1.8	0
									ILGYIASGEAEGAKLQAGGKR		ASTE004664-PA	2	697.052	2089.14	3	5.05	62.06	0.54	2
									RSGTVGYFVEPTVFSNVTDEMK		ASTE004664-PA	1	821.733	2463.18	3	4.68	58.06	-0.66	1
									EAGFPDGVINVVNGFGPTVGAAIVAHPDIRK		ASTE004664-PA	1	780.168	3117.65	4		30.33	1.07	1
									SPLVIFNDADLEEAVEIAHNAIFANHGQNccAGSR	C30(Carbamidomethyl); C31(Carbamidomethyl)	ASTE004664-PA	1	960.7	3839.78	4	4.65	20.74	-1.87	0
									ILGYIASGEAEGAK		ASTE004664-PA	57	689.864	1378.72	2		74.28	-0.61	0
									EAGFPDGVINVVNGFGPTVGAAIVAHPDIR		ASTE004664-PA	4	997.188	2989.55	3		32.41	-0.96	0
									SVTIKLPTKV		ASTE004664-PA	2	543.349	1085.69	2	2.88	39.87	-1.35	2
									KVAFTGSVETGR		ASTE004664-PA	35	417.895	1251.67	3		48.56	0.28	1
									FSTLDEVIER		ASTE004664-PA	30	604.813	1208.62	2		54.64	2.4	0
									IAREEIFGPVQSILK		ASTE004664-PA	23	567.329	1699.97	3		56.93	-0.65	1
									ANSTEYGLAAGVVTK		ASTE004664-PA	53	740.884	1480.76	2		87.89	-1.85	0
									KEPVGVVGQIIPWNYPILMLTWK		ASTE004664-PA	12	894.503	2681.49	3	4.57	46.41	1.86	1
									LILNGASTSNLK		ASTE004664-PA	4	615.858	1230.71	2		45.21	2.55	0
ASTE015229-PA	4.86	6	6		1132	131.045	7.47	Midgut
									EVLQDVAK		ASTE015229-PA	2	451.253	901.499	2	1.77	21.15	0.25	0
									STPVTASDPIFK		ASTE015229-PA	1	631.837	1262.67	2	2.37	39.11	3.01	0
									STINDESFFR		ASTE015229-PA	1	608.286	1215.56	2	2.6	73.43	-0.27	0
									mLSYEDQQQAR	M1(Oxidation)	ASTE015229-PA	1	692.811	1384.62	2	2.44	64.29	-0.93	0
									MLSYEDQQQAR		ASTE015229-PA	2	684.814	1368.62	2	2.36	75.71	-0.64	0
									AGTTHSASDYPVQR		ASTE015229-PA	2	497.239	1489.7	3	4.06	46.09	0.18	0
ASTE007732-PA	8.4	10	10	17	1666	182.777	7.72	Fatbody,Midgut,Brain,Ovary
									GGGYHQQDADVVADLIR		ASTE007732-PA	2	605.298	1813.88	3	2.97	24.1	-1.1	0
									LYSSLFPVGAEELYR		ASTE007732-PA	1	872.461	1743.91	2	2.26	43.49	11.57	0
									AQVNVDVNPTK		ASTE007732-PA	2	592.817	1184.63	2	2.38	76.75	0.18	0
									NAPASQSLYSR		ASTE007732-PA	1	597.3	1193.59	2	2.96	51.56	1.86	0
									APVLTPTMELK		ASTE007732-PA	3	600.339	1199.67	2	2.85	44.57	0.99	0
									APVLTPTmELK	M8(Oxidation)	ASTE007732-PA	1	608.334	1215.66	2	1.92	18.77	-4.58	0
									TSYLPTYFEAIGGTDPLFER		ASTE007732-PA	1	1139.06	2277.12	2	2.91	42.53	6.11	0
									LEELDLR		ASTE007732-PA	1	444.245	887.483	2	1.61	52.51	-0.55	0
									NPPVAQEEGGGPSTAVDDPR		ASTE007732-PA	2	996.97	1992.93	2	6.27	108.69	3.54	0
									TTAPTAAGASSPSR		ASTE007732-PA	3	637.821	1274.63	2	3.03	67.2	0.87	0
[truncated: 102,632 more rows]
