# Supplementary material for: Integrating transcriptomic and proteomic data for accurate assembly and annotation of genomes
Source: HighWire-hosted journal article supplement (doi:10.1101/gr.201368.115), 2016-11-15
Supplement: Supplemental_Table_S3.xlsx [file Supplemental_Table_S3.xlsx]

## Sheet: Indian strain
Supplemental Table S3.1 - Summary of transcript-based identification of genome assembly errors in Indian strain
Prasad et al., 2016. Integrating transcriptomic and proteomic data for accurate assembly and annotation of genomes
Transcript ID	Scaffold_rearrangement (Indian strain)	SDA-500_scaffold	Genes	Sequence_spanning_scaffolds
GSR_IOB_NIMR_1	scaffold00006-scaffold00057	KB664288	ASTE006461	CCAAACGAAACATATTCATCTACTGCTGTATATCGGCATGTTTATCATTGGTAAGTATGCGATTTCAATTGGATTTACTTTCATTGTAACGGTCATTTTGGTGCGCCAGATCACTGTTTTGACATTCCCTTTACCTTTCCCGATTTCCAGCTTACCTATCTGGTGGCGTTCTCTTGCGAAATCTCCTGGATATTGGAGGC
GSR_IOB_NIMR_2	scaffold00021-scaffold00080	KB664449	ASTE002931	CTTCAGTGACCCGCAAGGCTACGCGGAGGATCTGTTCAGTAACATTATGCGTAAGTGTTGTGATTCTATATATCTGCCCACCTACCTAAGTGCCATAAAGACATTATTTAAATCTTAACTCACCGCTTCCATCTCTACTTCTCCTTCCAGAATCATTCCACAAACATCCGCTGGAGATTGATTTGACACAGTCGTGCGTC
GSR_IOB_NIMR_3	scaffold00029-scaffold00134	KB664744	ASTE003249-ASTE003248	CACGTTTGCCTTGCCCTGCTGGTGGCCAACACACTCCGAATACTGTTCTGGTAAGTAACCGTATCATCATGGATTTTTTTTTTCGTTAGCTCTTTCGTTAATGGTAATTAATTATGTTTGTATCCACCGTCTTTTCTTTCCCGGCTACAGGTTTTCCAGCCGCTACGAGCTTCCGCTGCTGGTGCAGAGTGTGGTGATGA
GSR_IOB_NIMR_4	scaffold00164-scaffold00198	KB664510	ASTE000562-ASTE000560	GAGTGCCAGTCCTTCGACATAGCTTTGGTGTACTCGCCACTGAAAATAAGCTGTAAAAGGGAGAAGAGAGTAGATAGTTTTAATATAAAACCGGTAAAATCGGAATGAATGCATGTTTGGGCAGGAGGGAAAAGTGTTGTCTCCACCTACCTCATCGCAGGCACTGCACCGTGGCTTCAGCATTTCCGCGTAATGTCGCT
GSR_IOB_NIMR_5	scaffold00070-scaffold00307	KB664536	ASTE003901-ASTE003902	CTCTGTGTGAAGTCATCAGGTACGTTTAGATCCTCACCGATATCCAAGTACTGCAATGCAATAAATAGGGAGAAGAGAAAGAAGCGGAAATGTAGTTAGTATCGATTAGGATTAAAGAAAGCGTCGTGCTTTGCGGAAAGCAGTACTCACAGTCGAATGCCGCCAGTATTTCACCAGTTCGTGTATGTCCGAAGACGGCG
GSR_IOB_NIMR_6	scaffold00082-scaffold00324	KB664455	ASTE006244-ASTE006245	ACAACGTTCGGTGGCGAAGGCTCCGAGGAAGGTCAATTTAAATTCCCAAGGTAAGTCCCAACGTTCCAACGGTCGGTCGGACCGTATTTCGTAGTCGAAGTGACTTATAACTGACTTTCCTTCCCATCCATCTCGTTCTCTTCCCAACAGAGGAGTTGCGGTTGACGATCAGGGCTACATCTGTGTGGCCGACTCGGGCA
GSR_IOB_NIMR_7	scaffold00033-scaffold00366	KB664943	ASTE004163-ASTE004162	ACTGATTTCCAACTGTCGCTTGAGGATGTACTTTTCCTGCTCCAAGTTCTGTGAAAGAGAGGGAGAGAGAGCAAGAGGGAAGAGACTCGAAATCAATACGCCAACTCTTATCCCACTTAAATACAAAATCCCACCCATCAGTACTCACCTCAACCTTCGCCGAGTAGTCATCGATCAGCTTGTCCTGGTTCTTCTTCAGC
GSR_IOB_NIMR_8	scaffold00022-scaffold00389	KB664435	ASTE010028	CTCCCGGATCCGATCGATGTACGCACGCACCACATCCTCCGATCGAAGCTGCGCAAAGAGACGAACACACAGAACGCGAAAACATTACACATCAATTACTTAATTGATCGCTCCCCGTTAAGGTCAAGGTTGTGCAGAAATTCTTTACCTCCTTGTTGCGTATCCGCTCCGCCAGATCGACCGCCGGTATGTTGAGCATA
GSR_IOB_NIMR_9	scaffold00034-scaffold00412	KB665043	ASTE008508-ASTE008509	GCTGCCCCCAACGACGGAAACCATCCAGACGAAACCATTTCCTATTCGGGGTAAGTTTTTCTGCGACCGTGAACAAAATGCGACTTAGTTCAATCAACTATTAGATGTTCTTTAACTAATAATTGTGTTTTATTCCCTATCTTACTCCAGGTGAACGTGCCAACTATGTGAACAGCCCGCATGTGATTGCGATGGTCGGA
GSR_IOB_NIMR_10	scaffold00065-scaffold00470	KB664530	ASTE000013	GGACATTTCACCTCCTGTACGTTCGACTCCTTCGATAGAATTTCCTTCGCCTGTGAGAAGAGAATGATAAATGCAGAAAGAAGCAGATGTTAAGCATTAGTGCCCATCTCGTCATCATCATCATCATCATCATCGTTGCCTGCTGCCTACCTTATCACACAGAATTTTCACTTGCGATTCGGTCAATTGTTTGCACTCGT
GSR_IOB_NIMR_11	scaffold00022-scaffold00479	KB664435	ASTE015111	CTTGAACTTACTGTTCTTCTCTGGTTTCCTCGACGACCTCCTCCTCCGAGCTAAAAGAGATGGATTGGGTGGTTGAGAAACGGGATTTGGATTAAATGAAATCGTGTATGGACAGTGTGGGGCGTTTGCCGAGTGTGTGCGTATACTTACGAATACTCTTCATCGTCAGACATGGTGGCAGGGGTACGCTAAGACCTGGT
GSR_IOB_NIMR_12	scaffold00040-scaffold00490	KB664699	ASTE009281	CGGAAGTCAGCTACCGGAAGACGCTGCATCTACTCGACACGGACTCTTTCGTAAGTATGAAGTAGAAGAAAGGGATAAAAAGAAGAAAATGAAACACTATTTCCGGTGGTGATGTTTTGGACGTATTTCCCGCGTGCGTGTGGTGTCCAGAAATCGGCCCAGAACGGTACGACCTCGGTGGCGGAATCGTTGTACAAGAA
GSR_IOB_NIMR_13	scaffold00094-scaffold00516	KB664810	ASTE009052	CTGCATGTGTGGTACGGCGTACTCCTGGCACACGATATCGGGCACATCTGCGTTGGAAGAGAAGAGTGGGAAGGTGCATGAGCGTGGTGTGGTTGTGCAAGGTACGGCTAGTCGTTACTTGCGCCTCGTGGCTGGCTCGTTGCTTACCTGTATAGTCCGGGGTGATGTGATGGCGCTGCATGTCGCTCATCGAGCATCCG
GSR_IOB_NIMR_14	scaffold00105-scaffold00534	KB664453	ASTE009643	GACGATGGGTCCGAAATCGATGAACCAGAGAGCTCCTCCTGTCCCGAGAAANNNNNNNNNNNNNNNNNNNNNNNNNNNNNNNNNNNNNNNNNNNNNNNNNCCCCCCCCCCCTCCATATACCTTCCTCCCATACCGTCTGTTTTCCGTCTTACAGAGCAGCCTACGGATTGGGGATGAGTGCATATGCCACCGTTGCACGG
GSR_IOB_NIMR_15	scaffold00002-scaffold00606	KB664899	ASTE000853	CGCAAACCATCGACAACACGATCAACCCGAAGTGGGATTACTGGTGCGAGGTAAGTGGACTCGACGTCGAGCGAATGGACACGTTAGCGGCATGGCCGGCAAAAAAAACCAACCCAACGATCAACACCAATTCCCACCCCATACCTGCAGGCCTTTATCCACGCGGAAAGTGGTCAAACACTTCAGGTCGTGATCAACGA
GSR_IOB_NIMR_16	scaffold00002-scaffold00606	KB664899	ASTE000853	CGCAAACCATCGACAACACGATCAACCCGAAGTGGGATTACTGGTGCGAGGTAAGTGGACTCGACGTCGAGCGAATGGACACGTTAGCGGCATGGCCGGCTTCTCAAATGTGTTCGCGACGTGTTTTTGTTACTTCCGACGGGCGCGCAGAGCTACTGTGGAAATCAGCAGCGTTACCAAGAACGGTGAAATCGATACGG
GSR_IOB_NIMR_17	scaffold00001-scaffold00613	KB664600	ASTE008417	GCGATACTGTGCCATTGCAGCACCCTGTTCGCCGACACAAACTTACACAAGTAAGTATCGCGCTAGATAGTTGCTCTCGTCTGATTGTTCAGTGTGTCAGAGAACACGGTTGGAGAGAGCGTAAAAAATAAATTTAATTTCCGTTTTCAGATATATTCCGCCGATAACGGCATCAAGCCCAAACTTACCCGAAACGCCGG
GSR_IOB_NIMR_18	scaffold00136-scaffold00651	KB664510	ASTE000601-ASTE000598	GGGAAGCTGATGGTACGCTGAAAGGTGACGGGCTGTGTCACTACATCAAGGTAGGTGCATGTTTTGGGCTTTACTGGGGTATAATGTAATTTTTGCAGAGAAATATCAGCGTTAATGGTTTGCCCAATGTTTTTGCCTTCCGAATTGCAGATCGAGTCGGTAGATTTGGCGCTCAAAATTCTCGACAACTACGAGGTGCG
GSR_IOB_NIMR_19	scaffold00173-scaffold00658	KB664624	ASTE009106	GCTGCTTATATTCGACTGCGATGTGTCGCGTCAATGCCTTGGCAAGCGTGACTTCCATATCCTCTATTGTTGCGATCGGGAACAGTGTACAGGTGCCTGGGTTGCTGACGATCTACCGCGATGTGGCGAGTGATTGCTTTCGCTAGTGTACTTCCATATCCTCTATTGTTACGGTCGGGCACAGTGTAGAGATGTCTGAA
GSR_IOB_NIMR_20	scaffold00024-scaffold00663	KB664433	ASTE010423-ASTE010424	GCCCTGGCGGTGCGATACGACACTAATCCTCCGGCTGCTGCCACGATCAAGTAAGTTTTCCGTCCCGGTTTTGTTTTTAAATTGTAATGGAATATGCGCCCAGTTACAGAATAACATTAACCAACGTGCAATGACACCATTTCCCTACAGCTCCCGACCGATGCGTTTCCAAATCGGCCTACCGAGCACGATGGAAAACA
GSR_IOB_NIMR_21	scaffold00079-scaffold00674	KB665132	ASTE008996	GTCGTACTATAAGTCCAACCGCACCCAGGCCAAGGCCGATGTGGAGGAAGGTAAGAGGGATCGGGTCCAGCGCAAGCAGGACAAAAAGTGTAAGACCGCCTGGGGACACTGTATGCACTCATCCGCTTCCCACAAAAATAATAATTCCAGTTAAGCAAACGGAAACTAAAACCGAAACGCACAAATCGAAGCTCGGCGAC
GSR_IOB_NIMR_22	scaffold00051-scaffold00716	KB664634	ASTE009141	CTGACGGCACTTTGGTATTTTCATCCAGCTGCACCTCAACCATGGCCACCTGGGGGGGAGGGAGGAGATGGAGAAAACAACAGAAAAATTAATTAGTTTAAACCTCTGCCTAATAGAAAATTGCATTCTTTCCTCTTCGTTCTACTCACCATCGCAAATCCGGACAGCAGGGCGGACGTTTTGCTGGACGCTTTTAGCTT
GSR_IOB_NIMR_23	scaffold00036-scaffold00789	KB665043	ASTE008510	ATCTTCGTCATCCGCAACGACGTCCATTTCGGTGTCGATCGCTTCGGTTGGTGAGTAGTACGGGAGGTTGGAGCTAAGAAACAGGAAGCTTATTGTACAGTGCGAAAAAAGTTTGCTGATCTCTAATCCTTTTTTCGCATGATCCCACAGGCGATGACTCAACCGAGCGGGAGCTGAACGAATCGCACGTCAGCGTTAGG
GSR_IOB_NIMR_24	scaffold00322-scaffold00798	KB664511	ASTE002509	GTTCGGAACGACCCGTCCACTGGACGGACTGATGGTGGAAGCGACGGAAGGTAAGCGACCATCGTCTCTTTGCCGGGGTTTAGTTGTAGGGTAGCGCTAACTCTTCCGATAAATGTTACCTCTTGGCTTCTCGTTCCATCGAATTTTCAGGTGCAATGATGTTCCAGTACTACATAAAAATAGTTCCAACGATGTTTGTC
GSR_IOB_NIMR_25	scaffold00100-scaffold00800	KB664511	ASTE002474	TTGTCCTTCTTTCCTGCGCCTGGCAGCACGGCCACTCCTCCAGCCGGTTTCTGTAAATGTGGATGGATGTTTTACAGAAATTAGATACGTAGGTAACTGTGCTCTAGCTGAGAGGTAGACGCTAGTTATGATAGTGCGCGGCACACTTACGCGTTCCTTTTTGTCCTTCTTGATCGGGCTGCGGGAACCACGGGTCGGCG
GSR_IOB_NIMR_26	scaffold00056-scaffold00850	KB664301	ASTE004121	TGTTCGAAAGTGGCCGTCAGTCCGGACGAGCTACTGGTAAGGTGGAGGAAAGGCGACTGGCCACTTTGCGCGACCAGGTAGCGTCTGCTTGGCCGCTAGGCGGTTTGGCTTTCGAGAACTTTACCGAAACTGCAGTTTCGGGGACCACTTACCGTACTCTTTCGTTAGCTCCGGTGCCATGGAATGGGCCGAATAGTCGA
GSR_IOB_NIMR_27	scaffold00064-scaffold00863	KB664422	ASTE002597	ATCGATCGCATACACTTCACCGCCGCGATACCATTGTTTGCGATGAGCACCTACGGGTAAGTAAAGTGAGAAAAGCGTTTGTCACAACATCGGTTAATGGCGTTGCTCTTGCTGATGCCTTCCGCCTGGCGATGATGATCATGATCATACCTTGTTAATCACCCGCGTACCGTTGAATTTGTTCACAAACTCCTCCGTCG
GSR_IOB_NIMR_28	scaffold00064-scaffold00863	KB664422	ASTE014295-ASTE002597	AAGGTGCCACTCGCCAACAATCTGCACCTGTCCGTGTCCGGGGGTTTGAAGTTAGTATTTCTGTTGGTTTCGTAATGTTTGCGTGGGAATGGATGGTTTGTGTTCTTAAATTGTTGCTTATTATTTTCATCTTTGCTTGTTCATTTTTAGGCCCAGTATGTCCCACGGCACGGGACTGGGACTGCAGCGTGGCCAGGAAC
GSR_IOB_NIMR_29	scaffold00064-scaffold00863	KB664422	ASTE002597-ASTE002596	GCAGTTCCTCGTACGAGATGAACCTGACCGAAAAACGGCGCCGTTTAAGGTAAGGTTCTGCGGGTTTCCTCTATTCGCCTCATCCCCCCCAAGCAGCATCGTTCTTAAATTGTTGCTTATTATTTTCATCTTTGCTTGTTCATTTTTAGGCCCAGTATGTCCCACGGCACGGGACTGGGACTGCAGCGTGGCCAGGAACG
GSR_IOB_NIMR_30	scaffold00054-scaffold00880	KB664622	ASTE001414-ASTE001415	GAGGACGATCCCGACACTCATACTCATGCTGGTAATGCTGAATCACGAATCTGGTATAAATAAATATATTCCGTTTGCAATTACTGTGAAACTTGCGTTACCTGTTACTTCTTTCTAACAGCTTAATGAACTCGTACAAACCCATCTAACCTCGCTGGTACCGTCATCGGCAGAAGCTGGCTTGCGTGCTCTCGACCGGG
GSR_IOB_NIMR_31	scaffold00025-scaffold00915	KB665288	ASTE007766	CAGAATGGCCTTCCTCAAGAGCATCTGGAAAAATAGCTCCAAGCACAAGAGTAAGTAGAGTGCGTTGTTGCGCTAGCGACGAAGTAATTACACTGTTTTTTAAAGAATAAATAATTTAAATACTTTTTCCCCACCCTTTCTTTCTGATAGAATTGTGCGAGGAGCTCGCTCTAGCGAACAGCATTCGGGACTTTTCCGAA
GSR_IOB_NIMR_32	scaffold00019-scaffold01006	KB665321	ASTE011184	GCGAAGGTATCGGAGGAGGTCGCGCTCTTTTACAACAACCGGAAGAACTGGTGAGTTGTAAGGTTTCGTCTCGGTTAATTGGATCTTGGAGTGGCCGTAGTTGACAACGGGACTAATATCCTATTTCCTTTTCCTCTCCTCTCTTTGCAGAAAGTCGACCCGGAGCTTATCTTCACAAAGCAGGAGCGTATCGGTAAAGG
GSR_IOB_NIMR_33	scaffold00019-scaffold01006	KB665321	ASTE011184	TAGGGCGGATCCACCTCCGAGATATTCCATGATGATCCATAGCTTGGTGCCCTGTATTGCGGGTATTGAGGGGAAAAAAGCGAAGAAAAAAAACATTAATTAAAAACGGGGAAAATTTTAAGTATAGATACGATAAAATCATTAAACCTACCTTAAGATATGATCCGAAGTATTTGGTGACGAATGGCGAGTCACATTGC
GSR_IOB_NIMR_34	scaffold00023-scaffold01007	KB665176	ASTE001201	AAGGCGCTCGGAGTCGCCACACCGCTGGCCATGTCCAGTCCTGTGCGAAGGTAAGCCCCTAGTTACTGTATAAAACAGAAACCATGACACTATCATCCGTAACGCTAACGCTTCATTTTGTTTTTTTTTGCTGTCGCGTGTCGCTTACAGATCGAACCCCGGCACACCGACCCAACCGAGGAGGCCCGATTTCATCAGCG
GSR_IOB_NIMR_35	scaffold00101-scaffold01042	KB665365	ASTE004466-ASTE004467	TGGGAACGCTCTCGGCAACATTTCGGTCAACGTGACGGTCCAGGTGAACGGTAAGTGCTACACAGACACACACGGATCCACCACCTCCCTCAAAAAGGGGCAATCTTTACCAATCTCCGCCATGTCTATCTATGTCTTTCTCTCCACCAGCTCCTCCAAGAATCGTGCTCGGGCCGGAAAATCAGAACGTGAAAATCGGC
GSR_IOB_NIMR_36	scaffold00101-scaffold01042	KB665365	ASTE004466	TACTTGTCTTTCGGGGTTATGGTACGACCTTCCTTTTGCCATTTGATCTGTTCCGAGATAAGAGCGGTGGCGGAGAGAAACGCAGAAAACATGATTAGAAAAGGCCCTCCACACTGCTCGCTCTCGCTCTTGCTCTCGTTCACTCACCTGAAGTATATCGTCATTCTCCGCTTTACAGGGCATCTCCACAGTAGTGCCCT
GSR_IOB_NIMR_37	scaffold00002-scaffold01046	KB664899	ASTE000900	TCGCCACGATCCGACTGATGGTCGCCATTTGGTCGGGGTGAAGGTGAACCCTGCAAGAGGACGAAATAAACAGACAAAGGATAGGCGTGAAGAGCGTGAAACGCACACACACACGTACGGAAAACTCGATCGAATGCGCAATCAACTTACGTGGTTGAGTTTTTCCTCTTTCCGCCGTTTGGCTTCCCCGCCGTCCAGCT
GSR_IOB_NIMR_38	scaffold00002-scaffold01046	KB664899	ASTE000900	TTCGCGACGTCCACCACTAAATCCTGATCACTTTTCTCACCATCACTTTCCTGCAAAACAATATAGGGCAACTGTTCAATACAACGGATCAAACTGAGAAACGCACACACACACGTACGGAAAACTCGATCGAATGCGCAATCAACTTACGTGGTTGAGTTTTTCCTCTTTCCGCCGTTTGGCTTCCCCGCCGTCCAGCT
GSR_IOB_NIMR_39	scaffold00025-scaffold01075	KB665288	ASTE007770	TTGGCAACGATCGGTTGGACCAGAAAGTCGAACGCTATCTTCAGCTTAATGTAAGTACACCTCACCTCTGTAGAACTCTGGCTTCCAAACCAGAGCCGTTACATTTTAATTGCCCTAACAACTGTACTAACCATTTTTCCATTATTCCAGATACAAATCGATGATCTCCTCCCGAAATGTATCTGTGGATCCTGTTACCT
GSR_IOB_NIMR_40	scaffold00096-scaffold01098	KB664612	ASTE008129	TTAGCGACGCATTTAAATCCTCCACCGGAACAAGGTCACAGGGAAGATAGCTGCAAAGGAAGCGAATTGATGCGCGATGAGTGATGCTGTGGTGATCGATTTCAGAAGGAATGGATTTGTACTGCTATCGTTACAACTGGCTTATCTTACCTCTCGACGCCCATCGTTTGGCCGTGTTGGCTGAAGTTCGCCAACGATTC
GSR_IOB_NIMR_41	scaffold00011-scaffold01137	KB664844	ASTE010457	TTGCTGGAAATCAAATGGCTCTTCACACTGTTCATAGTGCTGTGTACAAAGTAAGTTTCTGTAAGTGGACAAAAATTACTCGAGTTTTCGTTTCTGTGTGTTCTCTGTGGATCGTACGGTAATTCGTTTTCAAATTCCTTTTCTTCCCAGCAATGACTACTCGTCCCGGTGCTACCAGTGCTGGAGCGTGTGCCGGTACT
GSR_IOB_NIMR_42	scaffold00073-scaffold01145	KB664488	ASTE002890	AGCTGGGCGTGCACACGGTGTCCGTCAAGTACAAGCAGATCCATATTCCTGGTAAGTTAGTGTGCTGCTTTATTCTTGGCTTTTACGTATGACGAGACAAGAGAGATTGAATCCGCCACTGACTGTCTCGCATTCCCCTTCCCTTCCCCAGGATCGCCATTCCAGTTCACCGTCGGCCCACTCAAGGATACCGGAGCGCA
GSR_IOB_NIMR_43	scaffold00025-scaffold01177	KB665288	ASTE007769-ASTE007768	CGCAGGGTCCGGACGGAGGACTTTCTGCGTCCAAATATTCCTACATAGGTAAGCCAACGGGAGCAAAAACTGCCCGGAACGATCGTAAGAAACTGTGTGAATTTCTCATTGTTGCTCTGTCTATTTCGCCACTCATCGCCATTTCCAGGTGGTTTCGATGGCACATCGAACGTGTTGGCCGGCAAGCTGTTTAACATTCC
GSR_IOB_NIMR_44	scaffold00757-scaffold01177	KB665288	ASTE007769	CCTGGTCGTTTAGCGCTAGAGCGACGGCACAGAAGTTCAGCAAACCACTCCTACGGAAATGGTGTCACCGAACAGAAAAAACAGAAACACCCATCGGTTGCAAAACAAACGAAACATCATCCGAGAGAGTAGAGCCTAGAAGCGGAATACCTCTTGACATCGTACGTGTCGACTAGTGCCATAAACCCGTCCGGGAACGC
GSR_IOB_NIMR_45	scaffold00757-scaffold01177	KB665288	ASTE007769	CCTGGTCGTTTAGCGCTAGAGCGACGGCACAGAAGTTCAGCAAACCACTCCTACGGAAATGGTGTCACCGAACAGAAAAAACAGAAACACCCATCGGTTGTCCTTTCCTTTACTATCGAGTGGTCTGCGCTGCTTTGTGCCATTCATTACCTGAAGGACTTTCCAACGGACTTGAGGTGATGGATCATGGTGTTCAATGC
GSR_IOB_NIMR_46	scaffold00144-scaffold01188	KB664511	ASTE002497	GTTCGGGCAAAGGTAGGAATTTTGGAGCTACGCTGCAGCTCGGAACATCTCTGCAAATAAATGGGAAAATAGGTGTGAGGTTGGACTTTTTTACGATACACTTACAAAAAATTAGTCATTTAAGCTGTCCTCTGTAACGCGAATACTCACATACGAGATCATTGGTATATCGCGACTCTGCGAAACGATCGCCTCGGTCT
GSR_IOB_NIMR_47	scaffold00093-scaffold01191	KB664688	ASTE004398	CGATCTTTGCCTCCGCCAGTGCTGTTTCCAGATCTAACGCACATGACGCGCTGTGTAGGAAAAGAAATGNNNNNNNNNNNNNNNNNNNNNNNNNNNNNNNGGTTGCTGCAGAGATGGATGTATGAGACATACAATGTTAGCTTTACTTACGAGGCAGTATCAGCATCACAAGCATCCTGGAACTGTAAAGAGACAGGCGA
GSR_IOB_NIMR_48	scaffold00073-scaffold01194	KB664488	ASTE002927	AAGCACCTTGTTGAGCTTGGTTGTTTCTTCATGTTGCTTTGGTGCGGAATCTGTAAGATACAAGCAAAGAATCAGTACATTTGGTCACAATCTTTAAAAAGACGCACCGTGTTCACGTGGGTTGGGTAACAAGCAGCAAACCTTACTTACCGATCGGTTTGGAAGCTGCCGGTGGGCCACACGCAATGCTTCGCTGATGA
GSR_IOB_NIMR_49	scaffold00023-scaffold01205	KB665176	ASTE001196	GCTGGCTGCTCCCTCCCCGGATACCATCTTCATGGACACTGTTCTTTACGGTAAGTGTGTGTGGGTGTGAAAGAGAGAGAGAGAGAATAACGCCAATCAAGTGCTAAGGTGCTCACCCACCCGTTTCCTTTCGTTTCTTCTCTGTCCTAGAGGGTGACAAGTGTGGTCTGCCCGGAACGCGGACAGGCATCTGCCGGAAG
GSR_IOB_NIMR_50	scaffold00121-scaffold01219	KB664799	ASTE001088	GAGGCCGAACTCGACGTACCGGTCTGCTGACCGTCATGGAACGTCCGCCCGGTAAGTTTGGGTTGGGGTGGGGGGAGGAATCGCGAGGCAGTCCCGCCAGGCTGTTCAAGCGAACCTTAATCGCCGTGATTGCTTGTCTCTCGTTTACCAGGCCGCTACAGTCCGGTACGCCGTGCGTCCGAAGGTTCCCGCATAACGTC
GSR_IOB_NIMR_51	scaffold00121-scaffold01219	KB664799	ASTE001088	ACAGACGGTACGCCACCCGCACATGTAAGCTTCCGACGGTACAGGAAATTGGTAAGTAGTAGCGGCCGCCGATGCGGCGGCTGACGATCGGACGGTCGGCGCTGTTCAAGCGAACCTTAATCGCCGTGATTGCTTGTCTCTCGTTTACCAGGCCGCTACAGTCCGGTACGCCGTGCGTCCGAAGGTTCCCGCATAACGTC
GSR_IOB_NIMR_52	scaffold00017-scaffold01221	KB664644	ASTE011371	CTTGATGGACATTCCGTCGGCCAGCTTGCTGTAGCGTCCATTGTTCGAAACTGTGTTTGTGTTAACAGGGTGCAAAGTGAAGCGAATTTAAATAAAGATCGGTATGAGGGTGAAATGGCAATGAAGAGTGAAATGTAGCGCTGAACTTACAGAACAGAGGTTGCCCGTTAAAGTACCAGGATACGGACGGTTCCGGATGT
GSR_IOB_NIMR_53	scaffold00028-scaffold01239	KB664434	ASTE004768-ASTE004769	AGGTGGTGCAGTGTACGAGCAAGGCGACGGGCCAAAAGCATGCCCTTAAGGTAAGATAAACGCACGGGGTGTCATCGATGAGGGCGGAAGCATAGCTCCACATACAATTACTAATCCGGGGGCTTATACCGCTTCGTTTCATCTCCACAGGTACTGCACGACAATGCCAAGGCACGGCGCGAAGTGGAGCTACATTGGCG
GSR_IOB_NIMR_54	scaffold00006-scaffold01259	KB664437	ASTE009699	TGGTCCAACAATCACGGCGTCAACATGGGTATGAGCTGGCCAACGTTCGTGGTAAGTGTGTGTGTGAATGGGGTGTGCCAGCGTGCCGGAATGATGATGCGTGTGTGCATTTTATGCTCCGCTCCGGCGCCCGTTCTCGTGCCTTCTCCAGGAGTACACGGAAGAGTTCCGCGACATTGCGAAGGGCATCAAATCCAAAG
GSR_IOB_NIMR_55	scaffold00006-scaffold01259	KB664437	ASTE009699	GGTCCAACAATCACGGCGTCAACATGGGTATGAGCTGGCCAACGTTCGTGGTAAGTGTGTGTGTGAATGGGGTGTGCCAGCGTGCCGGAATGATGATGCCAAAATCCTTATAGCGAGTATTATTGCTAAGAAGTTACCTTTGCCCATCAGGAATATCCGCCACCACCGCCAGCCAACAACAATCGGCTACTGGGAGGAGG
GSR_IOB_NIMR_56	scaffold00020-scaffold01271	KB664522	ASTE005255	CCACCGCGGACAGCGTCCCGCGGCTCACAGCATTCGCCGAACAGTTCCGGTAGGTTTTTCGTTTTTCGCTTTTGGTTTTTAGTTCGGTTCGGCCTCTGATCAAATTAACTCAAAAATCTTTCTTTGTCTCTCTCTCTCCACCTTCGCAGGCTCATCAAGTGGACGAAGATCTTCCGGCTCCAGGCATGTGTCCAGCACGA
GSR_IOB_NIMR_57	scaffold00020-scaffold01271	KB664522	ASTE005254-ASTE005255	ACATCCCGTGCGAACGGCATCATTCGATACGGCCGCTTTCAAGGCACTCGGTAAGTTGGTAGCTGGTGTGAGTTGAGAAACCCTGCATTAGTTCTTTGCATCAAATTAACTCAAAAATCTTTCTTTGTCTCTCTCTCTCCACCTTCGCAGGCTCATCAAGTGGACGAAGATCTTCCGGCTCCAGGCATGTGTCCAGCACG
GSR_IOB_NIMR_58	scaffold00016-scaffold01325	KB664504	ASTE000455	GGTCGAACACTGAAGTACATCATTACTCGTTTAAGCCTAGTAAACAAATCGTAAGTAACCGTTACCCGTTGGGATTTATTGATTGCCTATCTTCGCTTTACACGAAAGCTCTACAACGATTCTGCTTTCTTTCCCCCTTTTTTCTCCCAGAGTTATGCCACGCTGGGCCGTGCAAACAATAGCAGCGTCACCTCGACGCT
GSR_IOB_NIMR_59	scaffold00003-scaffold01334	KB664517	ASTE008778	CGCTGTACGCGAATATCGGAAGCTTTCTGCCGTTCAGCCTCGGAGGAAATCTGTGAAGTAACCAGCAGAAACAAAAGACCGCGAAACATGAGTAAACATGTTTCCCAGCTTTAGGCACGGAAAAACCCCCCGCCACCCCCCAACACTTACTTGATATTTTTCCTCTAAGAACCTGTTCGTTTCCCGCAGGGCAGAAATCT
GSR_IOB_NIMR_60	scaffold00035-scaffold01339	KB664491	ASTE003008	TGAGCGCCGTATTGAAAAAGGACTTTTTCTTCAACTGCTACCTCAAACTCGGTGAGTCCCCACACACACACACCCAAACACACGTGGCACCCAGCGAACCGCGTGCCAACAACGAAACCAACTAACTGGCAATGCAATTCTCTCGTTCCAGGTGACGTGATGGACGTACTGGCGTTGGTCAATTCCGCGATTAACTTCAT
GSR_IOB_NIMR_61	scaffold00072-scaffold01369	KB664433	ASTE010368	AGCTCCAAAAAGTTGGTTAAATTCGTCGAGCAGATGTACGAGATGGCCGTCTGGAAGTGGAGAGGTTGGCGACTGGTTACTGTAGGAGCGTCGAATCGTCAAATGCATTTCAAAGGTCTCTTAGTAAAACACGCCCAACATGATACATACCCTTCCACTGCGATCGGTAGAGTTGAGGTTCTCCTTCGAGATGCCATTCT
GSR_IOB_NIMR_62	scaffold00001-scaffold01401	KB664572	ASTE009093	CTGATTGCGATCGAGGGACGTGCCGATCATGCACTGTTGATCGATTGTCGGTGAGTATAATTCGGCATAAAAGTGCTTGATACTTGATTGGGTATTTATGAATGTCATTAATACATATCGATGCTATTGTTTATGTGTTTGTGTCCGCAGCAACCTCGAAACGGAACCGATTCCGTTCGATGCACCTCACCTGGCCATCC
GSR_IOB_NIMR_63	scaffold00006-scaffold01408	KB664437	ASTE009711	CTCAACTTTGTAAAATCGCAGGAAGTCGCTCGAACACTGTACAGCACCAGGTAAGTGGGAGTTCGTGCTTGATGGAGCAGAACAATTACACATACTCTCTCTAGTCGACCTACAATAATGCTCCTTCTCTTGTACCGCTGTGCTTTGCAGATACGACAACCTGGACATTGACACCATTTTGGGCAGCAATCGGCTGGTGT
GSR_IOB_NIMR_64	scaffold00082-scaffold01423	KB664455	ASTE014712-ASTE006244	TCGAGACACACGCAACACGTGAGTAGTTGCTCAAATTGCTCCATTTTTCACTGCAAGAGAATGGTGAAAGAAGAAGAAGCAGAATAAGAAATTCCGCCCCAGCAATTCCCCATTACGCACAGTAACTAGCGAGCAGCACAGCTTTCTTACAGCCTTGTATGGGTTGTTTTATTTCTGTTGTGGCTTTTCCCTTCAATTTT
GSR_IOB_NIMR_65	scaffold00021-scaffold01608	KB665287	ASTE011245	TCCGCATACCTGCGTGACCAATCTTCCAAAACCGCGCGAAATTCACCACGGTAAGTAGCGTGCAGGAGGAAGCGTGCATATCAGTGCGTTAGGCACTCCCCACCGGTACCGGTGGTACGGGCACGGCTGTCGGTGGCGCCGGCGGTGCAGATGCCTCCGTTGGTCCGGCCTCGGTAATGGTCGGCAATCTGGTGCAGGGC
GSR_IOB_NIMR_66	scaffold00014-scaffold01660	KB665088	ASTE008113-ASTE008099	GGATTCGTACACATCGGACGGAGGAACTGGCACGGAACAATCGACACAAGGTAGGTGTTTTAAGCATTATAGTGTAAGGCGCGAGCATGGAATCAGTGGCTACTAATACACACATCTGTTCTCGTTTCCGTTTCCCTCTCTGGTGTACAGGTCTGGAAGTTGACCTTTCGAACGAGCTGACACGCAAATTTCCCGACGTT
GSR_IOB_NIMR_67	scaffold00014-scaffold01660	KB665088	ASTE008099-ASTE008113	GGATTCGTACACATCGGACGGAGGAACTGGCACGGAACAATCGACACAAGGTAGGTGTTTTAAGCATTATAGTGTAAGGCGCGAGCATGGAATCAGTGGCGTAATTTTGTCCTCAACTAACCACATTATAACCCATGCTTATCGTTTTAGCCAAAATCACACCACCGCTCACGCAAAAAGTCGCCACCGTGCCGCCGCGA
GSR_IOB_NIMR_68	scaffold00007-scaffold01696	KB664921	ASTE000031	AGACAACCTGCCGGCTGTCGATACACCAGATGCATGTGATAAGGCCGCAGTCAGGTGAGTTCGAACGAGCTGTTTGTTGAGGGGAGGGACGTTCAACTCGAATCATAAGTTAACCTAAATCGACAATGCTTTTTTTCCTATTCTCTCATTTCAGACTACGATGTCTGCTGCGGCAACTGCAGCGCGGCGAAATTTCCGCC
GSR_IOB_NIMR_69	scaffold00807-scaffold01700	KB664810	ASTE009053	AGCTCGATGGTACTGCACACCAACAACATGTTCAGCAAGGACGTACAGGTAAGTGTATGTGTATGTGTGTGGACGACCGGGTCGCTATTGCTTCTGTTTCAAATTTTAAATTGCTACTGCTAATGTCCAAACAATCTCTTCTCCACAGGTTTTTGTCCATGCGAAGGTGTTCTTCAGCATCGGTGGTCAGCACTTTACCG
GSR_IOB_NIMR_70	scaffold00516-scaffold01700	KB664810	ASTE009053-ASTE009052	GGAGTTCCCGTTGACTTCCTCGTCGGAAAAGTTGCCCGTCACTGGTGCTGGAAATGGAGGAAAAAATGTTGAAGTACGTGTTAAATTGTTTAATTGACAAGTGGTGGTGCAGGGGGATTAGCAGTAAAACTTCCAACTTCGACTTACCTGAGTTGAAGGAGATTTCACTCAGCATGATCCAGCGCAATGCGAAGTAGAGA
GSR_IOB_NIMR_71	scaffold00236-scaffold01711	KB664510	ASTE000560-ASTE000559	GGTACACGGCGTGCGTTTCCCGCGGGCACTTGCACTCCTGGCACGTTTTTCTGCGAATGAAGAAAAGAAGAGGCACGCTTGTTTGTAGTGGTTGCACTAGGCACCGCAACGCATGAGATCAACAGATGAAAAACCACCCGGGATAATTACTTGCTAAGACGTCGGCCGCTCGTAACGGATAGCGGCGAACCCGGACAGGA
GSR_IOB_NIMR_72	scaffold00236-scaffold01711	KB664510	ASTE000560-ASTE000559	GGTACACGGCGTGCGTTTCCCGCGGGCACTTGCACTCCTGGCACGTTTTTCTGCGAATGAAGAAAAGAAGAGGCACGCTTGTTTGTAGTGGTTGCACTAGAGCACCGCAACGCATGAGATCAACAGATGAAAAACCACCCGGGATAATTACTTGCTAAGACGTCGGCCGCTCGTAACGGATAGCGGCGAACCCGGACAGG
GSR_IOB_NIMR_73	scaffold00023-scaffold01727	KB665243	ASTE006167-ASTE006166	AGAAAAAGTCGTGGCAAGGCGCAGCGAAGCAGCAGCAGCAGCACGGTGGTAAGAAGCGGGTGTTATAGTTTTCATTTTTATCCGGGTTATTCGTAGTACGCCCCTAAACAAGATTAATGCGAGACATTTGTTTTTAACTTTCGTACAGGTGGAGTACCGCTCGCCGAATCACCGAATCGCACCGGCCGGATTGCGCCACC
GSR_IOB_NIMR_74	scaffold00071-scaffold01730	KB664416	ASTE001908	ACCGGCCGCTAGTCCGGTTAGGAATCCTATCGCTCGGAGACATCGATATCCTGAAAGGGAGTTCAGTGTTTACTTTAAATTCAATTTTATTCCAGTTCAGGGTCAAGTGGAATTCATCAGCTGCTACACACATCCTTCTGCTAAACTTACCCAGCAAGGTGTAAACAATCCCAAACACCGCAATCGTCGTCCAGAGCAGC
GSR_IOB_NIMR_75	scaffold00091-scaffold01752	KB664485	ASTE008565	CTGATTCGATTCAAGCGAATAGCCTACCTGGCTCGGGAAGGAAAAGCCCTGCAAATGGAAAACCGAGCAAAAAAAAAACAGGTCATGAAACAAATTCTTGAGGTCTCACTTCAAAATATAGAAGGGAAAAGCTCCATCATCAACTTACCTCCGAGCCGCGCGTCCAGGCGGCCACGATCGAGTTGCAGGTCAGTATCGAT
GSR_IOB_NIMR_76	scaffold00071-scaffold01777	KB664416	ASTE014198	ACCGTGAAGCCCAGACCCGGAGAGGCACCGGGAATCGTTCACGCTCACTGGTAAAGGTGAAAGCAAAATCCGCACGAAACCGTTCTGTTCGGTCAGGAAATCGTCCCTCTTCTGTTCCTCCCCGAAACCCGCTTTTCCCACGGTTGGCAGTGCAGATCTGAGCGTCGAAAAGCCAATCACCGCGCGCGCCATCATCAGCA
GSR_IOB_NIMR_77	scaffold00071-scaffold01777	KB664416	ASTE014198	AAGCCCAGACCCGGAGAGGCACCGGGAATCGTTCACGCTCACTGGTAAAGGTGAAAGCAAAATCCGCACGAAACCGTTCTGTTCGGTCAGGAAAAGGAAATCGTCCCTCTTCTGTTCCTCCCCGAAACCCGCTTTTCCCACGGTTGGCAGTGCAGATCTGAGCGTCGAAAAGCCAATCACCGCGCGCGCCATCATCAGCA
GSR_IOB_NIMR_78	scaffold00071-scaffold01777	KB664416	ASTE014198	GAACACGTTCCCACAGGGCCGAAACTCGCACCTCCGTTTTCCGTGTACAGGTATCCCTTCACTCCTTTTCTTGTGCGGGCGTATACATGTGTGTGTGTGCCCTCTTCTGTTCCTCCCCGAAACCCGCTTTTCCCACGGTTGGCAGTGCAGATCTGAGCGTCGAAAAGCCAATCACCGCGCGCGCCATCATCAGCACGTTA
GSR_IOB_NIMR_79	scaffold00071-scaffold01777	KB664416	ASTE014198	ACCGTGAAGCCCAGACCCGGAGAGGCACCGGGAATCGTTCACGCTCACTGGTAAAGGTGAAAGCAAAATCCGCACGAAACCGTTCTGTTCGGTCAGGAAACCTCTTCTGTTCCTCCCCGAAACCCGCTTTTCCCACGGTTGGCAGTGCAGATCTGAGCGTCGAAAAGCCAATCACCGCGCGCGCCATCATCAGCACGTTA
GSR_IOB_NIMR_80	scaffold00071-scaffold01777	KB664416	ASTE014198	AAGCCCAGACCCGGAGAGGCACCGGGAATCGTTCACGCTCACTGGTAAAGGTGAAAGCAAAATCCGCACGAAACCGTTCTGTTCGGTCAGGAAAAGGAAACCTCTTCTGTTCCTCCCCGAAACCCGCTTTTCCCACGGTTGGCAGTGCAGATCTGAGCGTCGAAAAGCCAATCACCGCGCGCGCCATCATCAGCACGTTA
GSR_IOB_NIMR_81	scaffold00071-scaffold01777	KB664416	ASTE014198	GAACACGTTCCCACAGGGCCGAAACTCGCACCTCCGTTTTCCGTGTACAGGTATCCCTTCACTCCTTTTCTTGTGCGGGCGTATACATGTGTGTGTGTGCTCGTCCCTCTTCTGTTCCTCCCCGAAACCCGCTTTTCCCACGGTTGGCAGTGCAGATCTGAGCGTCGAAAAGCCAATCACCGCGCGCGCCATCATCAGCA
GSR_IOB_NIMR_82	scaffold00738-scaffold01897	KB664508	ASTE011006-ASTE011005	GGAGGCTTCGCGGACCGGAGGACACTGTCTGGGCTCAGCGGCACATCGATGGTAAGTGCAATCTCTAATGAAGCTACTCAACACACACACACTCTGAACACTGATTAAACATTTCTTTATTGCCTTTCTATTTTCATGTTGTCGTGTGCAGTCCAATATGGTTTCGTTCATGCAGTCGCGAGGATACGGATCTCAAAGTG
GSR_IOB_NIMR_83	scaffold00738-scaffold01897	KB664508	ASTE011006	GTGTGGGTAGTGTAGGAAGCGCAGGCGGTGGAGGAGTAGGGGAAGGAAATGTAAGTGAGTCATGGTGTAAATTATGCAGAAGCGAACTTCGATCATAGAGTGATTAAACATTTCTTTATTGCCTTTCTATTTTCATGTTGTCGTGTGCAGTCCAATATGGTTTCGTTCATGCAGTCGCGAGGATACGGATCTCAAAGTGG
GSR_IOB_NIMR_84	scaffold00738-scaffold01897	KB664508	ASTE011006	GGGTAGTGTAGGAAGCGCAGGCGGTGGAGGAGTAGGGGAAGGAAATGTAAGTGAGTCATGGTGTAAATTATGCAGAAGCGAACTTCGATCATAGAGAGCCTGATTAAACATTTCTTTATTGCCTTTCTATTTTCATGTTGTCGTGTGCAGTCCAATATGGTTTCGTTCATGCAGTCGCGAGGATACGGATCTCAAAGTGG
GSR_IOB_NIMR_85	scaffold01401-scaffold01901	KB664572	ASTE009093	TGAACGCACGAAGCAGGCTGCTGAAGCACTGAAGGCGAAGAACTTCATTAAGGTAAACGGTGTTGGTTAAATGTTAATTTGGCACCTGTTAACGATTAACTCCCGGTCTCACACAACTTTTTTTTTCTCTCTCGCTGTTCGTCTCTCACCAGATGGGCCAACTGATGACGGAATCGCACAAATCGCTCAGCGAAGACTTC
GSR_IOB_NIMR_86	scaffold00002-scaffold01903	KB664623	ASTE003549-ASTE003548	AAAATCCTGGAAGCGGCATACAATGTCAACAGTCGGCTTAGTCACAAAACGGTAAGATTGTAAAAAGGTTTTCTTTTTTTTCGGTATAGTAAACCGTTTGATTCACATCCTTAGCTATACCAAGTTCTCATGTTTCCCCTTATCCCCGTAGACGATGCGGCTAGTAAAGCAGGTGGATATGACGGAGCGACACATCGAGT
GSR_IOB_NIMR_87	scaffold00047-scaffold01905	KB664910	ASTE010832	AAGATCAACACCACCGGCGGCGATTACAAGATGATGGACAATATTAATCAGTAAGTATATGCGAGTTCCCAAGACAAAACTCAATATTCCTTGTTCAACAGCTTTCCATTACGCATTCTACATGTTTGCTCCTTCGCCCGTTGTTGACAGGTTCCAGAAGGCGTGCATCAAGTACGGTGTGGCCGATGTCGACCTCTTCC
GSR_IOB_NIMR_88	scaffold00003-scaffold01927	KB665376	ASTE009152	TAGGAGGATAGTGTGACCAGCACATCGCGATAGTCACCGCTCAGATCGCCCTGAAAGAAGGCAGAAGGGTAGAGGGTTTCGATCATCAACAACGAGGACGGACATGTTCTACGGGGGCCGGTGGACAAACAGCGACGGAATCACACATACCTTGATCCACGACTCGAGCGACTTGCCGTACATCTCCTGGAACGCTTCCT
GSR_IOB_NIMR_89	scaffold00003-scaffold01927	KB665376	ASTE009152	ACCACACCGAAACCATCAACAAAATGAGCTCGCAGTATTATCCATTCCAAGTAAGTATTCGAACCCCCTTCATTGGGGGGGTGCGTGAAAAATGCGCTCTACCCCATATAATTGCAAACGAATAACGTTTTGCTTCATCTCTCCATCCAGTGCACACCGACCGTCTACCCGGCCGATCCGTTCGATGCCAACGAAGATGC
GSR_IOB_NIMR_90	scaffold00092-scaffold01930	KB665210	ASTE000800	TACGTGCAGCCACGCTTCGACACCGCGATCAACTCGACTCGTGATTTCAGGTGAGCATTCATTTCGCTGGATGTGTGCACTCTCTTGTGTACGGTTACGTAGTGCCAATATACATAACCACAACCCTCCTACTCATGCCCGTATTGACAGCGTGCAAGAGGAAAAGCTTGTGCAGCAGAAAACCGGCCAAGGATTCAATA
GSR_IOB_NIMR_91	scaffold00092-scaffold01930	KB665210	ASTE000800	TACGTGCAGCCACGCTTCGACACCGCGATCAACTCGACTCGTGATTTCAGGTGAGCATTCATTTCGCTGGATGTGTGCACTCTCTTGTGTACGGTTACGTTAGCAATCGACCAACACGAGGCCCACCCCTCTCGTTCTTCATTTTCGCAGCGTCGAGGGCGGCGATGGAGCAAATGAAGGTTACAAAGATGTGTTTGAAG
GSR_IOB_NIMR_92	scaffold00014-scaffold01967	KB664592	ASTE001810	ACGCACCTTTTCGCTCCACTCGTGCGTGGTCATGTGCATCTCGTCAAAGTCTGTAAGGAAGTTGACAAAAAAAAACCAGAGGTACTAAGTAGCATTATAAAGAATATCACAGTCTAACACACACACGCACACACAAAGGGCGCTACTCACTGTTGTTTCCGTTTGGTGCGTATCCCCGCATATCCATACCACCGCCTCCG
GSR_IOB_NIMR_93	scaffold00014-scaffold01967	KB664592	ASTE001810	CTTATGTACGACGCCGGGCGGAAGATGTCCTTCGTAGTGTGCATAGAAAACTGGAGATTTCCCATGTCAACCCGGCCCCCGGGGACGGTAGGGCAAGAATAGAATATCACAGTCTAACACACACACGCACACACAAAGGGCGCTACTCACTGTTGTTTCCGTTTGGTGCGTATCCCCGCATATCCATACCACCGCCTCCG
GSR_IOB_NIMR_94	scaffold00005-scaffold01969	KB664289	ASTE005812	GCTGGCCTCCATTATCGTCTTCGAAGCACACGCACACGCCGGCACCGTATGTAAGTATTGGAACGTTTTCCGAGAACTTTCCCCGGTGGAAAGTTCGAAATCCTTCGCGCGATGACTTATCGGTTTGTTTCCTCTTCCTGTGTGTTTCAGTGTTTAACCAAGGCGACGAAGGACGATCCTGGTACATCCTGCTGAAAGGC
GSR_IOB_NIMR_95	scaffold00005-scaffold01969	KB664289	ASTE005812	CGAGCAGGTGTTCCAGCATTTTCTGAGGCGTACCAGACATAACAGTGTATCTGGACGTCCGGAGCAAGGCAGAAGGAAGACAGTAAAGAGCAGGAAAAAAATCTAATATCTATACCGATAAGCAATAAAACCAATAAATGTAAGCCATACTTGAATGCCGAGTATCCTCGCTGTTTCGCAACCCGTTCCAGTATTAGTAC
GSR_IOB_NIMR_96	scaffold00005-scaffold01969	KB664289	ASTE005812	CGAGCAGGTGTTCCAGCATTTTCTGAGGCGTACCAGACATAACAGTGTATCTGGACGTCCGGAGCAAGGCAGAAGGAAGACAGTAAAGAGCAGGAAAAAAGACACAAACAAGATACAAAAAGTCTAGGATGGGAATCAATTTTTTCTCACCTGGGTGCGTCGTTGATGAGCGCCAGCTTGCCAAAGTCATCACCTTCCTT
GSR_IOB_NIMR_97	scaffold00004-scaffold01973	KB665310	ASTE007460	AGAGTACGGGCCATGCGACCGTTCGGAACAAGAAGGACTCGCAGTTCGAGGTGAAGTGCAACACAAAAACAAGATCCGTTCTCACTCTCGTTTAGTGCCCCTCTCTCTCTCTCTCTCTCTCTCTATTTTCGCTTTTATTCTTCTGCATAGGAATTAACTGTCTCTTCCTCGGAAAAAAGAAATTGGAGAGGAATTTTTAT
GSR_IOB_NIMR_98	scaffold00051-scaffold02063	KB664595	ASTE007181	ACTGGCCACCGAATCGCAGCGCGGTTCCTACACCCTGAAGAAGATCAACGGTAGGTGGCGAGTGCCCGTGGGATGTGGGATCAACGNNNNNNNNNNNNNNTGGGTGGAACAAGTTGTAAACGTTTTGTTGTTGTTCTGGTCTCATTTTAGCTAACTCGAACCCATCTAGCCCCCAGCAGTCGCCAGTGAAAGCGAATCTA
GSR_IOB_NIMR_99	scaffold00051-scaffold02063	KB664595	ASTE007181	ATGGGGCGATGGCGTTCTCGGCGACGGGAGCACACTTTGTGCGGAGGTATCTGTTGGTATTTCGGTGGTTTCAGTTGTGACATGGACATGGACGCCCGACTTTCGTACATAATCGAGTGGGGGAAATGCGGTAAAACACGCGTTACTCACGTCCGTTAGCATTGGCCGAACCGTTAGTGACATTATTCACAATCGATAGA
GSR_IOB_NIMR_100	scaffold00051-scaffold02063	KB664595	ASTE007181-ASTE007180	TTTCACGCGATACAGGACGCCCGGCGGCAGGTCCGTGGTTGCCGTTGCACCTATCAGGTGAGAAGCGCCCAATCAGTCAGTAAATTAGAGAGCCCAAGGTTTTCGTACATAATCGAGTGGGGGAAATGCGGTAAAACACGCGTTACTCACGTCCGTTAGCATTGGCCGAACCGTTAGTGACATTATTCACAATCGATAGA
GSR_IOB_NIMR_101	scaffold00105-scaffold02073	KB664453	ASTE009659	TGAGAAACGTTGCAGCGGCGCTGTTTGTTATTCTCACCATCTTCAAACTAAGGTAAGGCAACGTTCATATTGAGATGTAATTGAAGATATGGTCACATCTCTCAAATACGTGAAGCTTCATTTGTTCCGTTTTTTTATGTCTGTTTGTACAGGGCTGCTAAATGTTTCGTTTCGTCAGTGCTTTGCTCGCGTATGCCAGG
GSR_IOB_NIMR_102	scaffold00040-scaffold02078	KB664699	ASTE009303	TTTGGCCACTGCCCGCGCGTTTACTGCGAGAGTCAACCAATGCTTCCACTAGGTAAGTATCGCTTTTTGCCCGATATTCTTAACAGAACGGCAGTATTTTCTCCCTTTATGGTAGCTCAAAATAATAAAAATGTTTACGCATCTCCTACCAGGTCTGTCTGATGTTCCCGGTGAGGCAATGGTAAAGTCTTACTGTCCCA
GSR_IOB_NIMR_103	scaffold00286-scaffold02146	KB665088	ASTE008116	ATTCCGTACGATCATCAGCAACACGAGCAAACTGGCAAAACCGGAACTGAAGGTAGGTGCTTCAAATCAATCTAGTGATAAAGAATATAGCAAATTAGATTTCCTCATAACCTTTGCGTATTTTTTCGCCTTTTTTCTAAAACACAACGCAGAACGCAGTGGTCGAGTTTGAGACGCGGCTAAAAGAATGCCTCGAGGTG
GSR_IOB_NIMR_104	scaffold00070-scaffold02169	KB664499	ASTE007418	CAACCTCCTGTCGGTCGGTATGCGGCCAAACGGCCAACCTGCAGCATGGCACAGGTAAATGATCCTGCAAACTATCCGTCCATAGATATTCCAGTTGCAGAAAAAAATCATTTGCAAACTATTAACGAACTATGTTTAATCTCCTTTTCTACAGATAATTCACAACAGTCCGACAGCAGTGTCCACGGAACCGAACAGGT
GSR_IOB_NIMR_105	scaffold00070-scaffold02169	KB664499	ASTE007418	CCTCCCCGTGACCACCGTTAGCGTGCCCATTAGCGTTAGCGTTAGCGGTGCTGCAATCATGGAGCGGCGAGCGGAAAAAAATGGGGAAAAAAGAAAGCGATGTTGCCCTCCGTGGGAAGATGGGAACGGGTTGCGGGACGATAGGTTTACCTGTTCGGTTCCGTGGACACTGCTGTCGGACTGTTGTGAATTATCTGTAG
GSR_IOB_NIMR_106	scaffold00070-scaffold02169	KB664499	ASTE007418	GCACACAACTCTTCTGACATCGATGGCCGTCGCATGCACATTACCGCTAGGTAAGTTTCACTGCGAAAACGTGCCGCGGGCTCTTAGTCTAAGTATACCTAAATCATTTGCAAACTATTAACGAACTATGTTTAATCTCCTTTTCTACAGATAATTCACAACAGTCCGACAGCAGTGTCCACGGAACCGAACAGGTAAAC
GSR_IOB_NIMR_107	scaffold00062-scaffold02193	KB664444	ASTE003631	GTCACCTGGACGACATTGAAGAATATAGCACCGAGCGTGTTGGCCGTTTCTGTGGAGTAGATGATAGTAGGGAGACGAAATTGAAACAATAAAATAGCGGAATTGGCACCGTCGTCCATTGCTCGGTGCCGGTTATATGCACTACGTACCCGTGTTTAAGTTTTGCAAGCACCGCCGGAACCGCGCATCGCAATCGCAGT
GSR_IOB_NIMR_108	scaffold00687-scaffold02230	KB664484	ASTE001445	CCCCAGATTGCCGGGACGCTTGTAGCCGACGGTTAATTTCCGCCCGGATGCTGTCGTTTACAACGATGACGGCGACCGACACACCGTGTGCCGGCGTAAGGTGTACTGTCTCTGTGTTAATGGCCGTTGTTGTTGCTGTGTTGAGCTTACCTTCGTTGTTGGTTTGTTTAGTGGTCAATGCATGTGACGGTTCAACCGCC
GSR_IOB_NIMR_109	scaffold00084-scaffold02271	KB664988	ASTE004733	TGAACTCTTCCGCATACCCTACCCACCGAAGCCGGTCATGACATCACAAGGTACGAACCCTCCACACCATCACCACCACAACCATCATCACAGTCACGATCGATGAAATATTAATCGTACCTACCTTTTCTTTCTCCCCACTCCGTAAAGAAACGGAAGAACTAGACCAGCAGCAGCAGCAGTCATCCATCAACAACAAC
GSR_IOB_NIMR_110	scaffold00097-scaffold02276	KB664544	ASTE002264	CTTATCCGCCGGCTGATCTCGGAATGGTCGCTGTGGATCGTACTCTAGATCTGAAAGCAAGCGANNNNNNNNNNNNNNNNNNNNNNNNNNNNNNNNNNNNTTGGCAGAGACCGCTCGTACCGACCAACGCACCACCACCATCATACGTACCTCGGTATCCTTGCCGCTCGACAACGTTTGCATCCTTTGCCATCTTGCCG
GSR_IOB_NIMR_111	scaffold01567-scaffold02324	KB664356	ASTE008829	GGCTGGTCGGTATCTTCGTCATGCCGCCGGCCGTAGCAGTCCATCTGATGGGTAAGTGTTGGCCGTGAAGAAAGGACGCCGGTTCAAGTGGATTCCCGCTGCTCCACAATTTTTATTCATTTTCCTGTGTTCTATTGCGCTTTCTTTACAGGCTCCTGGCAGCTCGGATGGATTCTGTGTGATATATGGATCTCATTAGA
GSR_IOB_NIMR_112	scaffold00048-scaffold02324	KB664356	ASTE008828-ASTE008829	TCGAGCGCCGACGACGGGAATAATTTAATGGTTGCGTTACGGCTAGATATCTGTGGGGATATACAAAGAGACGGGATTACAAACGAACGATCAGTGTTTGGAAAAGGAAAAAAAGACCCATTGAAACACGTGCTAACCTCAAGTACATACCTATCTATACTAATGGCACAAAGGCTGAGAATTGATGCTGTACATAGAAG
GSR_IOB_NIMR_113	scaffold00030-scaffold02348	KB664888	ASTE010054	TTTTCTCGATCCCTTAGAAGATGATAATGATGATTTTGCAGGCTTCACAGGTAAGTGTCGACACACGCAATCACGGGGCTAATACAACTACGGGGAGTACCTAATCACCTCTCTTTTCCACCTTCTCTTCCCGCTCCCCACCACACACAGTACCCAAGCAGGTGACGGAGGAACCGGAAAAGATTCGCAAATGGCGCGAA
GSR_IOB_NIMR_114	scaffold00030-scaffold02348	KB664888	ASTE010054	TGCCGATGCGCAAGATCCGCCCACTACTGCCGATAATAATCACAACACAGGTAAATAAAGAACTAACAAAACTGGTTACACTAAAACCACAAACACACACCTAATCACCTCTCTTTTCCACCTTCTCTTCCCGCTCCCCACCACACACAGTACCCAAGCAGGTGACGGAGGAACCGGAAAAGATTCGCAAATGGCGCGAA
GSR_IOB_NIMR_115	scaffold00030-scaffold02348	KB664888	ASTE010054	AACGTCCGCCACGAATGGTTCGGTCAATGGTGATCCTGTGCCGAAAGCAGGTTCGTGGATAGATAATACCGTTGCACTCCGCAGAAACAATGTTAGGCACCTAATCACCTCTCTTTTCCACCTTCTCTTCCCGCTCCCCACCACACACAGTACCCAAGCAGGTGACGGAGGAACCGGAAAAGATTCGCAAATGGCGCGAA
GSR_IOB_NIMR_116	scaffold00136-scaffold02414	KB664510	ASTE000589	TTCTTCGGTACTTTCGCACCGGGCAGGACTAGTGGCGTGGTACGGTACGGCTGGAATGAGGAAGTTTCGAGAGAGAGAGAAAGAGAGAGAGAGAGAAAGAATCAGGCACATAACCTCACTAGAAAACCACATAAACACTAGCAATCTTACTTGGTAATCGATCTGAGCCTCGTCGTAGTTTTCATTTCGATGCGCGAAAT
GSR_IOB_NIMR_117	scaffold00044-scaffold02415	KB665066	ASTE008247	GGGCCATCTTTGTCTGCACGCCAACCGACAACGACATCGATCGGAATTTAGTAAGTCGCCTGCCCGCCCGGGGAAAGGAAGGAACGGAAGCAATCGTATTAGGGAGCGGAATTAACCCCATTTTGTGGTGTGTGTGTGTGTCGGTTACAGTGCTATCTGAGGGAATTGATCCGGCTGATGGTTCCCAGCTTCTACAAGCA
GSR_IOB_NIMR_118	scaffold00007-scaffold02482	KB664921	ASTE000050	GAAATCGCGCTACGATAGTGGACAAGATCTGGATGAGATGAACCATAGCTGTACGTTCAATGCTCACCATTTGCAGTTAGTGATTGGGATCGCTAATCGCTATCTCTCTCTCTCTCTCTCTCTCTCTCTCTCTCTCTCTCTCCCTAGCAGCGGCGGAAATTGATCCGCAGCAAATCTACAGGCAGTTCTTCTTCCCGTCC
GSR_IOB_NIMR_119	scaffold00097-scaffold02498	KB664544	ASTE014252-ASTE002268	GGGGTTGCTGCTGGTCGATGCACATGCAGTCCGAAGTAATATATTCGGCGCTGTAATGCAAACATTGCAAAACGGAAAGGTATGTAAGTTTTTTTGTGTTTATATATATATTTTTTTAACCTGCAATAACGCACTTCCTGTTGCACTCACTTCCTGACCTTAAGATGAACCCCCTTTTAATGTGGGTGTCGAGCACTAAA
GSR_IOB_NIMR_120	scaffold00004-scaffold02532	KB664448	ASTE010588	AAGGCCCATGTCAATGCCGTTTTCTTCAACCAGCTGCGCGCACTATTAGGTAAGTGAGGGAGGGTGAACCAACGCCAGCCGTGATCCCACCGCCGGACGTGCTGCTGCAACACACGCCACAACTACCACGACTGCAATTGGCATAATAGGCATCATCATTCCGAAGGCATGGAGCGTCGAGAACGGATTGCTGGTCGTGA
GSR_IOB_NIMR_121	scaffold00004-scaffold02532	KB664448	ASTE010588	GAAGGCCCATGTCAATGCCGTTTTCTTCAACCAGCTGCGCGCACTATTAGGTAAGTGAGGGAGGGTGAACCAACGCCAGCCGTGATCCCACCGCCGGACGAGGAAGAGAGAAAGAGAGAGTGAGAGTACTAATTTCCTCTACCTTTCTAGATCGCTGTCGTTAACAATGTTCTAAAATGGAGCATAGGAGAGCTGAAGCT
GSR_IOB_NIMR_122	scaffold02600-scaffold02642	KB664555	ASTE010772	ACCACCACCAGCTGATCGCCGGCCGCTTCGAGCTTGTTGTTGAAGTCCTCCTATCGGGGTGTGAGAGAGAGGGAGAGAGATGCAATGAATAGACCTGTGTTTCACTTGGGCACTTGGGCACGGAAAACTACTCCTTGCTGCTATACTTACGGAATCTTTCACCATGTACACCATTTTGGATAAGCTTTTTGGGGGGGAGG
GSR_IOB_NIMR_123	scaffold00080-scaffold02716	KB664954	ASTE000131	CCCCGTACCGCTGGCAGTGCGTCGAGTGACGCCACCATGTCTGCACCGACCTGCAAATAGCCAGACACTGATTGATTAGATTCTGAAGCTCGCGGTGATGTTGTCAGAAATCAATAACCACCACCCTCTCTTGCACCCTCACGAGCTTACCTGATCGAGCAGCCGGTACATCTGTTTGATTTTGCTCAGGCTAAGCGACG
GSR_IOB_NIMR_124	scaffold00098-scaffold02758	KB664777	ASTE005023	CGGTGTTTCCATGAAGCCCCACGGATCGGCCAAAATTAAACCGGCCACTCTGTAAGGNNNNNNNNNNNNNNNNNNNNNNNNNNNNNNNNNNNNNNNNNNNGTCGAGGCGCGTCGAAGCCTCGTAAGTAAAGGCAGAAGGAAACACCTACCGTTGGGGATGCGTGATGGAGTAGCTGCAGGCCAGATAGCCGCCCATCGAA
GSR_IOB_NIMR_125	scaffold00001-scaffold02765	KB664436	ASTE004633	CCCACTAATGGACAACCTAGTGAACAGTACGGCCATTCTTCATCTCAAAGGTACGCTATTACGGTTAGGCACAGGCGGAAAGTTTTATATCTTCCACTGGCACTCAAAAATTGTAAAACATAATGTATTTGCTTCATTATTCGTTCACAGACAACCGATTTCTCTGCGACTGTCGGCTACTGTGGCTGTTCGACCTTCGG
GSR_IOB_NIMR_126	scaffold00600-scaffold02775	KB664288	ASTE006450	CTTACGGACGATGGACTGTTAGAGAACTATCTACAAGGCGGTGCCTCCAAGTAAGTTAACACACCCAACAAGCTACAAACAACATTGCAGAAACTGAATGCAACTAATAAAGTGTTTTGTTCACTACTCTCCTTTCACTAACTTTTGCAGACGATCATCCCTGATCCAGGTGTACCGAAGGGGATGCATCCCACGGGGTG
GSR_IOB_NIMR_127	scaffold00040-scaffold02802	KB664699	ASTE009316	CGGTCGTTACGATCAGCAACAGGTCGGCCAGAGCAAGCGACAGGATGTAGCTGGAAAAATGGAAGGAAAAAAAACCGAACAGAACCAAACAAGAGAAGAATCAAGTTCTGATACGGTACGGTACGATAATTACAATCAAACGGTACTCACGTGTTGGGCACGTTGCGCATCGCCCGGTGCCTCAGGAAGACGATAATAAG
GSR_IOB_NIMR_128	scaffold00019-scaffold02864	KB664518	ASTE003303	TGAACAGCCGCTTCACCGGTCGGTGGCTATCTCCCGGGGGCCATGCTCGTCTGAAAGAAATATTGCAACGATACGCATTAGCGTTTTGGGCGTCTTAGTGCCGCTCAAATTGGCGCAAACACAGCGCCAACAGCTGCTAAAGATCCTTACACTGGCTCAGGTGATCTGCACTAGCACACGACATCCACCTCGAGATCGGC
GSR_IOB_NIMR_129	scaffold00020-scaffold02877	KB664522	ASTE005194	GAGTGGGGCATTCGTCTGACTCCTCCATGGCGGATCGCTGATGGCTCATCGTGCACGGGACGAAAGGACAATCTTTAGTCAAGGAAACATCACTAAAAAGGATCGAAATTCTCGGGGAAAATCTTAATCATCAAAATTTGAAAAGGATATCAGAAACGAGATGAGATCCCGGGAACCGCTCCGGTGCTCCAGACTTAGAT
GSR_IOB_NIMR_130	scaffold00010-scaffold03006	KB664758	ASTE007178	GATGCCGGGAATGTCGTCGCTTGTGTCCGTCATGCCGGCAAATGAGATACCTTTACCATGGGGGGGAAGGGAAATGAAAAAAGGGGAAAATTAGAAAACAAAGGAACAACTGAAACCAAACAACGTCTGGGAACGGGGGGTTTGCTTTACCTTCATGATCGGAGTGATGAAAATCGCGCCCGAAGCGTGTGTGCGTGGGC
GSR_IOB_NIMR_131	scaffold00010-scaffold03006	KB664758	ASTE007178	ATCATCCGCTGAGTGCTGATCATACGTCTTATCAGTCAGTTGGAAGCAAGGTAAGGTTATTCCCTGCTTTTTGTTTTCTTTTGTTTTTAGCTGGTACCGGCCTTTCCCCCCTCTTTTTCGTGCCATCCCACTGCTGCACCATACGTACAGACCGGTAAAGGTTCTCCGGCGTCCATCGGATCGGAACGCATCACCACCTC
GSR_IOB_NIMR_132	scaffold00045-scaffold03082	KB664482	ASTE001237	GGAATGTGTTTGCTGTTCTCTTGCAATTCGCACGAGTACTTGCTGCTTGTCTGCTCGCCGGCAAACAGGATCCGTGGACATCGTTCAGCAATATGGAGAGGATTATATGTTGACGCTATACCGAGATGTTTGGAATGCTCTGATACTTACGGATCTTTTTAGCTTCTGCCGGAGATATCCTGCCATGAAGAACTGCTTGT
GSR_IOB_NIMR_133	scaffold00039-scaffold03248	KB664439	ASTE007033	ATCGTCTTTGCGACGAAGAAGCTGAGGTACTTGCTTTGGGTGGAGATGGTCNNNNNNNNNNNNNNNNNNNNNNNNNNNNNNNNNNNNNNNNNNNNNNNNNTTTCTATATTAGTAATCCTATGCTGGGGAGCAACCGCAGCCATTACTTACCAGCAGTGGAATATTTGGTGTCGTAATGCGAAGGTTCTTATCTACACTAA
GSR_IOB_NIMR_134	scaffold00133-scaffold03263	KB664497	ASTE010991	AGATGCAGCACCATCTGACGCTGTTTAAATCGCCCGCCGTTAATCGGAATGTAAGTAGGCATGATCGATTACTCCCCTGATCCGGGGGGGGGAGTGTCAACGTTACCTGCTGCTCCCTGTTCTCACACACCTACCGCCTATATTTCGCAGTCTCAAAACGGTGACACACCCGATTTCCCTGCGTCCGGAGCTGGAAGCGC
GSR_IOB_NIMR_135	scaffold00133-scaffold03263	KB664497	ASTE010991	AGCCACCGCAACGGCCACCGCTTGCTCCGAAGCCCACCTTCCGCAAAGAGGTAATGAAACTTGCCCTTTACCACACCTTCCACTGCTTTCTGCTGCTCTACGTTACCTGCTGCTCCCTGTTCTCACACACCTACCGCCTATATTTCGCAGTCTCAAAACGGTGACACACCCGATTTCCCTGCGTCCGGAGCTGGAAGCGC
GSR_IOB_NIMR_136	scaffold00206-scaffold03345	KB664557	ASTE009325	CATACTGGAATGCAAGCTCGGCATCTTCCGTAGCGCCATCAAATAGGCCTCCTGTGGGTTGCAGATTTAAATACACCAAAAAAGTGATAATAATGATTTAATGCTTTACAAGAACATTCTAATAGTAAAAACCTTCCCTTCAGACACCTACCGATTTTAATGTGCTCCACTGTTTCATCAAGATCACCATTGTAGGATTC
GSR_IOB_NIMR_137	scaffold00024-scaffold03389	KB664832	ASTE005669	GTTCGGAAGCTGCGCGCTGGCCCGTCCGGGATACGCCGTTGATTATTATGTGAGCATTTTGTTTGTTGCTGTTTAGGGAGGGTTTTGGTTTTGTTCTTAAAGAACAACCCGTTAACAACCCAACTATTCTCGCCTTTTCCTCCCGACAGGATCATCCCAAGTACGCGTTCAACTACGGTGTCGCGGACCACAGCACCGGT
GSR_IOB_NIMR_138	scaffold00006-scaffold03402	KB664437	ASTE009717-ASTE009716	CTGGGGCGAGCAGTTCCGACAGTTGCGCTGTATCACCTCCGGGAGGGCAGCTAAAAGAAGCAGGTTGGAAGGTGGAGATTTAGTAGCAGCAGGAAGTGAATTAGCCTGACAAGCTTACACCGCTACCGTTACCGCCGGTGGTACACAAACCTTTCAGCTGTCGGCCGAGCTGGTCACACGGGCTCTTCTCCAGGACGCAC
GSR_IOB_NIMR_139	scaffold00036-scaffold03412	KB664552	ASTE002108	TGGCTTTGTTTCTTTCTGTTCGAGATGTCCCGTATCAGATCGTAAAAGATCTGGCATGTTTAAGTTGCGTCACACGATCACAGGACAGAAGAGGAACGGGACACACACATACAAGCCCGGGCCGGGGCTGTGCATGATGATATCACATACCTTGTCCACATTTTCGCGTGTTTTAGCCGATGTTTCAACGTATGGCACAC
GSR_IOB_NIMR_140	scaffold00032-scaffold03432	KB664480	ASTE000944	AGCTGCTCAAGGGCGAAGGTTACCAGCTCGACGCTAACGCACTGCTCGGGGTAAGTTTGAGTGACTGGTGATGGCAGATTTTGTTGTGTGGAGGGAGAGGTCAACTTTATCCACCTGTGAATACAACTCACACGACTCCAACCACAACAGAACGCATGCTCTACCGCACCTCCGTTCGGACGCGTGTACTTCCCGTCGTG
GSR_IOB_NIMR_141	scaffold00109-scaffold03465	KB664419	ASTE006585	ACCGGTTAAGCAATATGCAGCTTGTGGACGGTGGTGATAATGGGAAGGAGGTGAGTGTCTGACCGTGTGCCACCATTGGAAGGGGTTTTGCTCTCCGTTGGTTTTGTCACCGCCTTTTTTCTGTTTGTTTCCCTTTTTCTCCCCAACCAGCTATCGTACAGACAAACGCAAGCGATGGACTACGTGACCAGCGTGATTGC
GSR_IOB_NIMR_142	scaffold00109-scaffold03465	KB664419	ASTE006585	ATTGCATCCACCTTCTCCGGACAGTCTTGTTCCAGTTCGTACCCGCAGAGCTAGCGATTGGAGTGAGTGAGTGAGTGAGTAAGTAAATAGTAACTGCCACCGGCCAATAGATAAATAAATAGCTAGGTTGCAACCGTGTTCGTATCATACCTTCAAGCATTGGCAGACACATTTCGTGTTTTCCGGTCCTTTCTTGACGA
GSR_IOB_NIMR_143	scaffold00132-scaffold03478	KB664444	ASTE003691	CACAATCATCCCATATCCAGCAGCAACAGCAGCAACAGCAACAAGATACTGTGAGTTATTATTCATTCTATCACAAGTAGGCTGGTAGCGCTCTATGCCTTGACCTGATCTTTCTCTGTCTTTTTTTTTTGTATATTTTATGCAAATTAGTGGGAACTGCAAAATCAACTTATGCAACATCAATCGCAAATTTCGAATCT
GSR_IOB_NIMR_144	scaffold00025-scaffold03491	KB665288	ASTE007779-ASTE007777	GCACAAAGTCTGGACAGACGTACAGCAGCTTCTGGAATGATTTGATCGCCCTGAAATTAACAAAGTCGAAGCAGAAGCGAGAACGCAATTAGTATTTGATATTTTAGATTGGAATTCGCACTGTAAGCCTATTGTGAAGCTTCTACTCACCATCTGAAGGCATTGTAGTGGAAGTACACCAATCCTAACCCGTACAGAAA
GSR_IOB_NIMR_145	scaffold00074-scaffold03496	KB664999	ASTE009866-ASTE009867	CTGCCCGTTTGTCATGATGGCTCCGTTGCAGAGAGCACTTTGAGAATTCCTGTGAAGAAGAAAATGTTACGTTTTAGTATAACTTCAAACCATTCGGAAGCCCGTATCTCACAATTCCTCCCCACTCCATCACCCCGGATTTCACTTACCCGATTGTCCCGTTCTTTAGATTATCAACCAGCGTCGGTGGGGATTTGCAG
GSR_IOB_NIMR_146	scaffold00100-scaffold03498	KB664511	ASTE002476	GAAATGGCGTGCGGTGAAACGGTGCAGGAGATTTTGCTGTTCATACTGGGGTAAGTTTTTCTTAAAACTAAAGCGCCTTGCTAGCTCTAGAGATGGCAAGACTTTACATCCCTTTCTTTCCCTCTCGTTCTGTTTTTTTTGCAACGCCAGCGTACAGCAAGTGGCCGTAACCGAGGTGGAACTATCGCCAAAACATCGTT
GSR_IOB_NIMR_147	scaffold00001-scaffold03557	KB664550	ASTE003077	CGGGGCACCGTACTGCCCATAACCACCCGGCTGTCCTTGATACGGTGCGCCTGTACAAAGAATGGCAGAACCAGCAGTTAGTAACGATGCCTTGGGAAGAGAGGCATTGCTCTTAAAGGACGGAGAAAACGGTTAGGTAAACGCTCCTACCTGGATGAGGAGACTGAGTGCCACCTTGCTGCGAAGGTGGCCTTTGCTGG
GSR_IOB_NIMR_148	scaffold00051-scaffold03625	KB664456	ASTE010523	TCGTCAGATTCGCATCATTCACAACCCACAGCATTCCGTCATGATAGAAGGTACGTACCGGTGGTTGCCGCCTCGGGTTACACACCATGTGTGTGTGCGCTTTTGCTGTATCCTGATTTGCGTTGCTAATTGTTTTCTATTCCATTTCAGCGGATGACGATTCTGACACGAGCCCACACGATCTGGAAATGGGGTCCGAC
GSR_IOB_NIMR_149	scaffold00051-scaffold03625	KB664456	ASTE010523-ASTE010524	ACACTTCCGACAGGTCTTCCGTTTTGGCGCGTCTCAGCAGCCGCTCGTATCTGGCAGAGCAGAGTATACAATGTGTGATAGAGGACGAGAGAGAAAAGAGTAGCTTTATCGAACGTTTAGGCACGCTTTGCATAACAACGCGCATATTACCTGCATCTGTGTGAAGGAATGAGCGGCACCGGATAGTTGAGCTGCCAGGC
GSR_IOB_NIMR_150	scaffold00121-scaffold03723	KB664799	ASTE001089	TGGTAGCCGCCAAAGTTTACGCCAAACTTCCCATCGCGGAAGGTGAGAAACTGCAATTAGGGAGGAAAGAAATTGTATAAACGGATCAGTGCAGTACTGCCTCCGAACACTCTCACACACACATTGGTCACACGCGACAGAACAACTTACTTGCGGAACTGGACTTGCCAGGGTGCACTGTACGATCACGAGGATCAGCA
GSR_IOB_NIMR_151	scaffold00006-scaffold03744	KB664288	ASTE006372	ACACGACATTACCGCGAACATCGAAGCACCAAGGGATGATTTCAATAATGGTAAGTAAAAAGGCTTTTTTGTTTCGGTTTGTTTACGCTGTTGATGTTGATGTTCCTATCAGTTCTTCCAGAACTAATCGCTCGTTTTGCTCCATTTCAGATTTAGCTCGCAACTTTCACTCGCCACGGTTGGAATACAACGAATGGTTG
GSR_IOB_NIMR_152	scaffold00412-scaffold03801	KB665043	ASTE008509	CATCACTAGCCATCACATCATGCCAACCAACGTGCGGGAGAGAGATCCTTCTTTGGGGAGAATAGGAGGAGTTAATCATCGTCTACTTTTTCTCGTCCGGAAGCACTGCTACAGAGAGCTCGTGTGATGCACAGGAGCAAACCCACTTACCTCCGGTTTGGCGCGATGTGTATCGACGGCATGAATCGGCAGCATAATGT
GSR_IOB_NIMR_153	scaffold00412-scaffold03801	KB665043	ASTE008509	GGATTGGGATTCGGTTTCCCCACAAACTTGGCATCGAGTTGGCCCGGTACCTAAAACAAAACAAGCAACAATTTTGAAACCCCGTCCCATGGTCCCGGGTAAGCACTGCTACAGAGAGCTCGTGTGATGCACAGGAGCAAACCCACTTACCTCCGGTTTGGCGCGATGTGTATCGACGGCATGAATCGGCAGCATAATGT
GSR_IOB_NIMR_154	scaffold00412-scaffold03801	KB665043	ASTE008509	CCAGGTCAAGCTCAGTGGCTTGGAGCATCATCCACCACTGGTTCCGAACGAGGTGACTATTGTTTGTGCAGTGTGTGTTTGTGTGTTTATCGATGACTAATTTTTTTTCTGTTGCTTTATTTTCGGTCGACACACTTGTTTTGCTCGTGCAGGAAGTAAAAGTAAGTAGCCCCGACTATCGGAACATGAACATGGACGAG
GSR_IOB_NIMR_155	scaffold00412-scaffold03801	KB665043	ASTE008509	GGGCTACCGCCCACGGTGCTGTCGAAGGAATCGTCCAGATCCAGCTCACTCTGGAAGAGAAATGGTAGGGAGAAGGATTTGGGATGACGGGGGTTTCACAAAGCACTGCTACAGAGAGCTCGTGTGATGCACAGGAGCAAACCCACTTACCTCCGGTTTGGCGCGATGTGTATCGACGGCATGAATCGGCAGCATAATGT
GSR_IOB_NIMR_156	scaffold00412-scaffold03801	KB665043	ASTE008509	TCGTCGAATCAATCTGTGACGATCCCAGCATTATCGAGCAAAACATCATGGTAAGCATCGTTCCGGGAGAGGGGGGAGGTAAAACACTCCACTCGTCTACTTTTTTCTGTTGCTTTATTTTCGGTCGACACACTTGTTTTGCTCGTGCAGGAAGTAAAAGTAAGTAGCCCCGACTATCGGAACATGAACATGGACGAGGC
GSR_IOB_NIMR_157	scaffold01444-scaffold03802	KB664621	ASTE014974	TCACAAAACTGCACCACCGTTTGGTTTGGTTTGCGAACTGAAAGTGCCTTTTAAAAGAGTGGATGATTAAGCGATGAGTGTCTGGAGCTCTATCAAAGCGCGACACAGTACGCAGTGCACAAAACTTGACGTTCGTTCTGTCCTCTGAAGATAGCTCTCGTTCGATCCCAACCAGTTGTAGGCATCACGATCCCGATCAT
GSR_IOB_NIMR_158	scaffold00077-scaffold04139	KB664547	ASTE008433	ATCTCTACACCTGCTTCGACTCGATCGTCGAAAACTTTGACGTGTACAAGGTAAGCTGCGGGGGGCGACTATTAGCAATCCAAAGAACTATAGCCTCAAAAGTTTCTAACCATTTGTGCCTTCCACTTCCCACACATTTCTTCCCGCCAGGTTGAAACAATCGGTGACGCGTACATGGTAGTGTCCGGGCTTCCGGTGCG
GSR_IOB_NIMR_159	scaffold02850-scaffold04175	KB664444	ASTE003694	CAGCTGAACAAGAGCTTCTACTACTAGCGTTCCCAACGTTTCCTGCTCGTCTGTTGATGCCGGCGATGCCGTAGTAGAAGAATAAATGCAACAAGAGAGATTCTAAAATATTTGTTTGTAGTGAAATTAATGAAATACAAAAATAAATACCTGAACTTTGTGGCTGTTTCACTGTTCCGGTATCAGGGCTGCCGCCTAAG
GSR_IOB_NIMR_160	scaffold00097-scaffold04239	KB664544	ASTE002288	GGAAGTGGAGTGTACAAAACCGTTCCCTATGTACGGACTAGGAACGCCACCTGGAAGCGAAAAGATAAGAATGGCAAAAAGGATTAGCAATAAGGAAAACTTTATTGTACTATTTAATTAACTTTCAAATGCATCTCTTGCCATACGTACTTCTGACAGTTGAACACGACGACGCGAACTTTGACGAGATGATTGAGCCG
GSR_IOB_NIMR_161	scaffold00017-scaffold04563	KB664644	ASTE011395	ATCTCCAGAAATTGCTCACCGTTAAAACGATTTTTTTGATCTTCGATATCCTTTGGAAAACGAAAGCAAAATAAAGGTAAGAACACCGAGGGAAAAGGAAGGTTTCGTTCCCTTCACCTGTGCACCTTCACCGGTAGTCGAGCGTCTTACCTTATTCTTTACCAAATAAGGAAGAGTTTCACATATACGCTTCCAGTCAG
GSR_IOB_NIMR_162	scaffold00076-scaffold04611	KB665176	ASTE001168	AGCAGGTCATATTCGCTGAATTTTCCCGCAAATGTGCTGAACGATGGAAGGTAAGTTGGTTTGTGGTGTGGGTGATGCATATCTCCAAAAACAGGGCTCCTTTGTTGAATTATAACGAACTTTTTGTTTGTTCTTTTCTCCTTGTTGCAGACGATGTTGGATAAGGAGAAGCAGCGTTTCCACGAGATGGCTGAGAAGGA
GSR_IOB_NIMR_163	scaffold00067-scaffold04626	KB664462	ASTE010228-ASTE010229	CGCCGCACGACGAACGTTTCCTCGGCTATGGTTACACGCGCAATACGCAGGTAAGTGGTTAGGGTGGGTGGAGGAAAAGGGGAGAAGGGAGGGAGAGGTGCCCTCTCTCTGCTTTTCTCACGTCCCATCGGACGATGTTCGCCATCGCAGGTGTACGAAATGTTTGTGGCAGGCTATCAGTTCCAGGTGCTGACGCCACT
GSR_IOB_NIMR_164	scaffold00126-scaffold04721	KB664528	ASTE003280	GAAACGGATTTACCTGGTCGTACAATCCCAGCGCTTTTGTGTAGTTTCGGACCTGGAATAAAATAAAAAAAGCATTATTTAATGTTGTAATGTGTTGTGTTAAGACAAAAGACCTAAATTAAAGTACAATCGCTAAAAAGGATAAGGCATACCTTCATATACTTCAGTGCCTCATCTCGTAGATTTTTTCCCGCCACTTC
GSR_IOB_NIMR_165	scaffold04753-scaffold04891	KB664803	ASTE000009	TGAACTGCGTAGGGGACAGTTTTAATGGCTTGCACCGTTTTTTACGACCGCTAGATAGACGAAACAAAAAACCGCATCGTAAGCGACGAGCGTTGTCTCTCGTCATTGCAATAAATGTTAGATTCTCGTTTCTTACTGCTAACTACTCACCTAACTGTGTTGGGACAAAATAATTAAATAAAAACGGTTAGGCACGATTC
GSR_IOB_NIMR_166	scaffold04753-scaffold04891	KB664803	ASTE000009	CTCTTCCTTCATTCCACACAGCTTCGTGTGTGTTGCATGTATGCTGTGAACTGCGTAGGGGACAGTTTTAATGGCTTGCACCGTTTTTTACGACCGCTAGCGTCATTGCAATAAATGTTAGATTCTCGTTTCTTACTGCTAACTACTCACCTAACTGTGTTGGGACAAAATAATTAAATAAAAACGGTTAGGCACGATTC
GSR_IOB_NIMR_167	scaffold02348-scaffold05080	KB664888	ASTE010054	ATTGGTACAAACATCACGAGGAAACCATCTCGAAGACGAAAGCCGCCAATAGGTAAGCCCAAAAGCAAGCCGAACGATCGATTGAACGGGACTGTAATGGAGCGTGTGTCGGCTAACTTATACCGGTTTGGTTTTGTTTGTTGCGATTTCAGAAACGCCGAAAAACAGTTCGTGGCCGAGACGGACGAGATTGAACCGGG
GSR_IOB_NIMR_168	scaffold00108-scaffold05415	KB664633	ASTE007590	CTAGCTGAAGCTGGTGCACCCGCTATTAAGCGTACCAGACTTGAACCGGCGGTAAGTAATCGAGAGCCCATCATTTGGACCTACCCGAACGTTGGCTGTCTGTAAAGTACGAAAATTCACTTTTGCTTTCCTTTTTCCTTTTCTTAAACAGCACACCAACAACACTTCGTTCGTCACTACAACACCGTCCGTCGCAGCGC
GSR_IOB_NIMR_169	scaffold00139-scaffold05526	KB664422	ASTE002651	CATGGCATCGTAAAGCGGGATGTGCTGCCAGCAGGCTTCCAGGAACCGGAGTAAGTTAAATAATGCTCTACTCTTAAGGGTTAGATATTTTAGCTATCTTATTTGCGTAAACAACCAGCACTAACCATCTGATTTCTTTCTCTCCCACAGGGATCTCGAAATAACGACCTCCATCACGGAAAATGCCCCGGAACCGTCCC
GSR_IOB_NIMR_170	scaffold00092-scaffold05547	KB664345	ASTE008984	TACAGGGCGGCAGTCGAACCGGACGTAACGCGAGATGTCGTAGCGAAGCCTGGAGGAGTTAAAAAAAGTTGAGTTTATGTTTCTTTGATCAGGTAGAGATCCCCGGTAGCAAAATTATTGTCGCACGGATATAAAAGAAAAACACTTACCAACCGCTTTACCCGCCTCGAGGGCCCATTTGGCGATGGAGGCAAGTTTTT
GSR_IOB_NIMR_171	scaffold00004-scaffold05563	KB665310	ASTE007466	AGCGTATTGTACTGGCTCCAGTCGTAGAATGCATCCCGCTTAAAAGACTTCTNNNNNNNNNNNNNNNNNNNNNNNNNNNNNNNNNNNNNNNNNNNNNNNNCAGGTTAGTAAAGTTTCTTCCCCATGCTAGATTTTGAGGACGGATCTTACCCTTACGCGTAGACTCTTGATATTAGCATAACCGGCCCGCTTGATACGCC
GSR_IOB_NIMR_172	scaffold00023-scaffold05589	KB665065	ASTE003946	GCGCTTTGTGGCTGCGATGCAGCCATAATAGCAGCATTGAGTTCATTGCCCTTTGATGTCAAGCAAAGATTAGTTAGAATAGGTACATATTTTGTTAGTTTGCTACAATACAACACTACCGAACTCTACAATGAGCACAATGGCGCGTACCTTTGCTGCTGTATCACTTTCGGTCTTACAATCCGTTTCCAGCGTATCTG
GSR_IOB_NIMR_173	scaffold00003-scaffold05656	KB664428	ASTE008900	GCCGTCCATTTCGACCACAGGCTTTGCGGCCTGGATGCGGGTGTCGGTGCCTAAAAACGAAGCATAAAGGATTACGGATTCGCAAGAGTTTTCTGTAGTTCCAACAAGAGGCGAAAGATAACAGTGAATCTGGAGGCGGTGAATACTTACTACGGGCACGCGCCGGCATCATCGAGACGGCCGGCAGCACCGACGATTGG
GSR_IOB_NIMR_174	scaffold00071-scaffold05849	KB664416	ASTE001910	CAGCTGCCCGATCGCGCTGTCGTCGATTCTTGAACCAATTCGAAACCTGCAAATGATGAAGATGTTAATGATCGTCAGCCAAAAAAAGGCAAAAAGGTACCAGGTACAGTTGGCTGGGCTCCTCTAGCCATTTGTACGCCACTTACCTGCGTCGTCGTTAATCCGGTCGCTTCGGCCAGCTCCCGCTTTTCTCTCGGCGA
GSR_IOB_NIMR_175	scaffold00017-scaffold05911	KB664555	ASTE010749	CAGTTCGTGCGTGAGAAACACGCTATCCGGCTCCGGCGTTGGTGCAATTTCCTGTCAGGTTGAAAGTGGTTGAAAGAGAAGAAAAATCCAACAAAAAAACGGAAAACATACGCTTGGGAGATTCCCCGACTGCCAGACGAGTCTTACTCACCTGATCCAGTGCCCTTATCTGGTCGGCGATGCTTCGCTTCAGCTGCTGG
GSR_IOB_NIMR_176	scaffold00003-scaffold06271	KB665165	ASTE001921	ACGAATCCGGGCAGCAGCACTAGACGTTCATGAGAATGAGCCATACAATGTATTTCAGGTTTATTCTACTACTTATACTATCTTTTTTCTCTACATACCGCGTGTGCACATGGCGATAATCCGGGGAACGATGCGGCGTTGTCCTGCAGGGTGCCCTGAAAGATGCCCCCAACCTGCTCTGTACGCCACACGCTGCCTTC
GSR_IOB_NIMR_177	scaffold00003-scaffold06271	KB665165	ASTE001921	GCACTGTGAGGTGCCTCGAGCGGTGTTGTACTATGGGCTTGCTGTAATCCACCTGAATAATAGCCGCCATTTATACCAGCTATAAGTTTTTTTCTTGATTACAAACAGAAAAACAACAAACAACAAATCGGACAACCGGGTGGACTACTAACCTTCTGAGTATCCGCCGGCACCACCGCCCGTCGACGAGCGCAGGAAGT
GSR_IOB_NIMR_178	scaffold00003-scaffold06271	KB665165	ASTE001921	GGCAGCAGCACTAGACGTTCATGAGAATGAGCCATACAATGTATTTCAGGTTTATTCTACTACTTATACTATCTTTTTTCTCTACATACCGTTTGTGTTGCGTGTGCACATGGCGATAATCCGGGGAACGATGCGGCGTTGTCCTGCAGGGTGCCCTGAAAGATGCCCCCAACCTGCTCTGTACGCCACACGCTGCCTTC
GSR_IOB_NIMR_179	scaffold00460-scaffold06283	KB664439	ASTE007033	CGTCGCCAGGTAGATCCATCGGCGGATCGGTGGCGTTAGTTCACTGACACCCTGGAGAACGGAGAAGGCGAACATTATTTACTTACTCATCGTAAGGAATATGCAAATCACATAACTTCGGGCGTTTGCAGGAACAGGGAATGCCACTTACCTCCTCGAGCCACATGATGGGAAATACGAAATCCCGAAAGTCTTTGGTT
GSR_IOB_NIMR_180	scaffold00004-scaffold06576	KB664448	ASTE010574	GATCGCAGTGATCCTGTACCCGATTTGCTTTGCAGCCGAATTGAACATTGGTAAGTGGAACCAAAAACCCCCTGTATGCCTAAACTGCTAGTAGTAGCTACATATTCCATATTACATTTTTGATGTTCTCTCTCTCACTCTCTATTGTAGCTAACCGGTTGGTCTGGGAGTTCGGCTGGGCGTACGGTGTCGGCTGGGGT
GSR_IOB_NIMR_181	scaffold01006-scaffold06784	KB665321	ASTE015244-ASTE011184	TTACCGATACGCTCCTGCTTTGTGAAGATAAGCTCCGGGTCGACTTTCTGCAAAGAGAGGAGAGGAAAAGGAAATAGGATATTAGTCCCGTTGTCAATAGCATCAGAAGGAGAGGGAAAAAAACACACAGCAAAACGAACTCGATACCTGTTTTTCCGGCTGCTGGTGGTGCTGATTAACGGTGAACTCATCCGTTGCCG
GSR_IOB_NIMR_182	scaffold01030-scaffold06797	KB664635	ASTE005396	CACCGTGGGCGAGATGCTGTTGCCAAGCTTGCGCAGAACCATGCCGACACCTGGGAGGAAGATAAGAAGCAGCGGGTTAATGATGGTGGGTCAAAGTCAACTCGTTTGGCAAATCCCGTGTGCACCGTCGCTTCACGCCCCATTACTTACCGAGAGCCTTCATGTAGTCATCGAATCCCTCCGACTTCTCCATCTTGTAC
GSR_IOB_NIMR_183	scaffold00090-scaffold06915	KB664810	ASTE009083-ASTE009082	GGACAGTTGCTTCTCTTCTACACGGACATGTTCGTCGTCGATGCTGGCACGTAAGTTTGACGGGACGATTAAGATAACTAAGGAAGCAAAACATATTCATCACGCGGATGATACTATATTATTCTATTTATTAACCTTTCTCTTCAACAGGCTCGGGCTAACCCCACACAGCAAGGTATGGGTCGGTGCCTGGTGGGTTG
GSR_IOB_NIMR_184	scaffold00731-scaffold07071	KB664482	ASTE001239	CCGGAGCTTGTTGTTACCGGCCGTCGCAGTGCTATAGAGGGCGAGGCGTACTACAAGAAAAGAATGCTTTACAATTAACCTGTTGAGGGATTCTCCCGGCGTTCCACCCAGGCAAGTGCATAAACTGCATCACCACAACCCTCTGCTTACCTCCGCTACCCTGGTGGCGGCTGCTGCACTGCTGCAACAAGTTGCGTGTA
GSR_IOB_NIMR_185	scaffold00016-scaffold07376	KB664450	ASTE003747	GTCGTAGGCGATCCACAGTCCACCGTTAGTGTATCATTATGTGAAGGAATGGTAAGTGAGATAGTTAATGTACCTCATTGAATTTAACCACGATTAGATTATGTTGCTCACAACGAACTTTCCATCATTTGCTCGTTTGTCATCCCCACAGCACGGACACATTAAGATCACGAACGCATCCTTTTTTATCGAACCGACGA
GSR_IOB_NIMR_186	scaffold03136-scaffold07813	KB664448	ASTE010562	TTTCCCCAGCTTGTCTGATCTAATACACCACATAGAGAACACACATATAGGTAAGTTCGGGTGCATCGGCCAAGGCGAAGATTGATTTAGTAAGGGAGTAAAAAAAAAATCCCTCCTTCTTTAACGCCCCATTACACGTTCTGCTTGCAGATGACTCACAAGCGCCGGAGGTAACGGAAAAGACACAGCCGACCTGCCTT
GSR_IOB_NIMR_187	scaffold00014-scaffold08069	KB664628	ASTE004089	GCTAGATGCAAGCCACACCAATGACCCTGGTGGTAATGTAATGGAAAGAAGTGAGTATTAGAATAAAGGTTATTGGGGAAGATTATTTCACCGTACAAAATAATGTCTAATATATTGCACCCATCAACGGCCCTCGTTCCCAACTAACAGCTGAAAAACCTGACGAAAAACCACAGTCAAACGGGGTAATGTCACCGTCC
GSR_IOB_NIMR_188	scaffold00120-scaffold08127	KB664566	ASTE003851	TTCCTTTTTACGCTGGCCCCATTTTTCATAGTCAAAATAGATGTAGGTTCCCTGGAAAACGCGAGAGAGAGAGAGAGNNNNNNNNNNNNNNNNNNNNNNNAGCAAAACAACATTTCGATCAGCAGCACCGTTCCTTCCACTCCGTTCTTACCTGCTCGTACTCTTCGTTGATCACTTTCGGTTCTTCGTGGCGCTGGAAC
GSR_IOB_NIMR_189	scaffold00004-scaffold09260	KB664448	ASTE010566	CTTCTCTTCAATAATCGCTTCGGACAGACGGGCAAGCAGTACCGCCTTGATACCTGGGGGGGGGGAACGATAAAGTGACGAGATTTTATCATTTCCTATTCGTCAAGGCACCCTCCAAGATATACCCGGCATAGAGAAGATATACCCCCTTACCATCGGTCGGTAGGTTGCGATTGGTCAGCTCCGTTTTCAGCTCAGCC
GSR_IOB_NIMR_190	scaffold00076-scaffold09642	KB665176	ASTE001165	AAAATAGTCAATCGAAGGACGATTCATTGCGTTCCCCTAGTATAGATCAGGTACGGCCATCACACCATCACTTTTGCTCGATTTCCCGACTTTCTATTAACGCTCTCTATTTTCCCAAAATCGAAACCGTCCGCCATTCTCCTTCTGCAGGATTTCACGGACGTTTAGCTTTAGTAACAAGGGCCACGGATTGTATCTAG
GSR_IOB_NIMR_191	scaffold00847-scaffold09642	KB665176	ASTE001165	CGAGTCTGAAACCGCTGCTCGAAGTTGATTTTCTTCCATTGGCCGATCTAAGGTACGTGGCAAACGAATCGCCGCAGTGTTCCGGCGTGTGAACCCGTGTGTCGCTCTCTATTTTCCCAAAATCGAAACCGTCCGCCATTCTCCTTCTGCAGGATTTCACGGACGTTTAGCTTTAGTAACAAGGGCCACGGATTGTATCT
GSR_IOB_NIMR_192	scaffold00028-scaffold10320	KB664499	ASTE007408	CCTTCGCTCATCTACGCCAATGCCGACAATCAGATGAGCCTTACCGCCAAGTAAGTATCGATCACGGGTGAAAAAAGGGAAGCACCGGGAAGATACGTACCAATTTTTTATATAAACTTCATCTTATCACCTCCATTCTGTTCACACTAGAATTGCCGCCGCATGCTGGGTTGGGCACTACGCAAAACGTCTGCTGGAAA
GSR_IOB_NIMR_193	scaffold00078-scaffold10363	KB664510	ASTE000617	GGCCGGCCAGGAAGAGTACGACAAAATCAGGCAACAGTTTTACAAGCGGGTAAGAAACGCCGTACTTCGTGGCTGAATTTGTTTGTTATGGGGAATTCGTATCTTAAGCAGATACAATATTGCTTTATAATTGCTTTATATTCCTACAGGCCCATTGCTTCCTCCTATGCTACAGTATAGACAACAGAGTTTCGTTCGAG
GSR_IOB_NIMR_194	scaffold00083-scaffold11016	KB664667	ASTE011454	TACTGGTTCCGGGTAATGAGCAGTTCGTCCGCGATGATCAGGCTACCGTTCTGGAAATTGGGGAGAGAGAGATACAGATCATCGCTTAATACCCCGGAAAACATAAGCTAGACGTTGTATACTATATGAAGTTAGCTAACGTTTACTTACCCTTGCGATACTCCACTCATCCACCGAGCTTTCCTCGGGCAGCAGCTCGT
GSR_IOB_NIMR_195	scaffold00004-scaffold11273	KB664821	ASTE014608	AGAATTAAAACCGGTGTAATAAAATATATTGCTGGCTCTGAGGAGTGTGTGTGTGTGTTTTTTTTTCATGTAATGTGGAACCCGGGACAGTGCAGGCGGTCGTGTTAAATAAAAAATTGCCAAATGTATTGCTTTTCTGGCATACTAGTCGTGTTTTTTTTATATAATGTGGAACAATCTAATTGTATCATTTAACTTTT
GSR_IOB_NIMR_196	scaffold00056-scaffold11727	KB664301	ASTE004133	GCAGGGCCTGGTGGTGGACGGTACGGTCACGAACGAACCGACCAAAATGAAGGTATGAAGGTGTATGGACCAATTGGGACATTGGGCAGGCTAATACACTTTGTGTTACAGTTTAATAGGGTTTTTACGCATTTTAATAACCTCATTTTCAGAACATCTGGAAGCTACGTGAACTGATAGCGGACAGTCTGCTGAGCGAT
GSR_IOB_NIMR_197	scaffold00093-scaffold13184	KB664688	ASTE004401	TAACCCAGAACGACGCCTAGGATTGTACCGTGGTGGTCCACGGAATGGGACTGCGAGTAGAAGTGAATGGATAGGAGTTTGGATTTGACCAAATGCATCATTTGCATACAACGGTCATATAGAATTGGTGCTCAATTAGCACCGACTTACCAATATCCTCGTTTTTATAGTTTTGAATCATTTCAGCCAACTCGAGATTA
GSR_IOB_NIMR_198	scaffold00093-scaffold13184	KB664688	ASTE004401	GGTGCCAACAGAGGCGCACTAAACTATGCCAACCAGACACCGTACCAGGTATACTATAACTTCTTTTTATTAATAAAATTGCGTTTTCTCGTACATTATTCCTATATTTTTGGCAAAATTGCTAAGTAATGTTATGTTTTCGTCTCAGGTCGCCGTTATTGCCGGTAATCTCGAGTTGGCTGAAATGATTCAAAACTATA
GSR_IOB_NIMR_199	scaffold00024-scaffold13422	KB664433	ASTE010437	GTCGGGGACGCCACGTTAGCTCCACTTTCCGTCAGCACTTTGCGAGTGTTCTGGAAGGTGGAAGAGTAAGCGTCATACAATGCACCATACGGCGAAGGATCTAGGCAAATGCATTTGCCCTCCCTCGCTCCCTCGCTCCCTTTCTCTTACCTTGATGATGGTCTCCATGTTTTCGGCAAAGTTTTCCTTTTCCAGAACCA
GSR_IOB_NIMR_200	scaffold00103-scaffold14628	KB664367	ASTE004281	ACGGGACGACGGACTTACTCACGAGCAGAGGAAGCAGCGGTAGGTGGATGGTAACATCCGTGTTTGTTCTTTTTTCTTGCCACCCCATAGTGGATGTAGTTAAAGGTTATTAAGCTAAAGTTGTATGTGTGCGTTTTTTTCTTCTTCCAGCGATGCTGACATCATGCGACAAAAGCAGATGAAGAAGGAGCAGGTGGCGC
GSR_IOB_NIMR_201	scaffold00103-scaffold14628	KB664367	ASTE004281	CAACCGAAGCAACGGGACGACGGACTTACTCACGAGCAGAGGAAGCAGCGGTAGGTGGATGGTAACATCCGTGTTTGTTCTTTTTTCTTGCCACCCCATATAAAGGTTATTAAGCTAAAGTTGTATGTGTGCGTTTTTTTCTTCTTCCAGCGATGCTGACATCATGCGACAAAAGCAGATGAAGAAGGAGCAGGTGGCGC
GSR_IOB_NIMR_202	scaffold02498-scaffold14669	KB664544	ASTE014252	CACATTAAAAGGGGGTTCATCTTAAGGTCAGGAAGTGAGTGCAACAGGAAGTGCGTTATTGCAGGTTAAAAAAATATATATATAAAGAGCTGCAACCCGGTTTTTTTTGCTTGCTTCAAACTCATACTTCTATATCCCCCCATCCCTTAGCACGCGGGAGCAAAAATCGCGTTTTGTTTACTGTGATTCGTTAGTTTTTT
GSR_IOB_NIMR_203	scaffold02498-scaffold14669	KB664544	ASTE014252	TTTAGTGCTCGACACCCACATTAAAAGGGGGTTCATCTTAAGGTCAGGAAGTGAGTGCAACAGGAAGTGCGTTATTGCAGGTTAAAAAAATATATATATATTTTTTTTGCTTGCTTCAAACTCATACTTCTATATCCCCCCATCCCTTAGCACGCGGGAGCAAAAATCGCGTTTTGTTTACTGTGATTCGTTAGTTTTTT
GSR_IOB_NIMR_204	scaffold02498-scaffold14669	KB664544	ASTE014252	AGGCACAGTTTAGTGCTCGACACCCACATTAAAAGGGGGTTCATCTTAAGGTCAGGAAGTGAGTGCAACAGGAAGTGCGTTATTGCAGGTTAAAAAAATATTTTTTTTGCTTGCTTCAAACTCATACTTCTATATCCCCCCATCCCTTAGCACGCGGGAGCAAAAATCGCGTTTTGTTTACTGTGATTCGTTAGTTTTTT
GSR_IOB_NIMR_205	scaffold02498-scaffold14669	KB664544	ASTE014252	CATCTTAAGGTCAGGAAGTGAGTGCAACAGGAAGTGCGTTATTGCAGGTTAAAAAAATATATATATAAAGAGCTGCAACCCGGAAACGCGCCCATATAAAATTCGCAAGGGTTTTTTTTTTGCTTGCTTCAAACTCATACTTCTATATCCCCCCATCCCTTAGCACGCGGGAGCAAAAATCGCGTTTTGTTTACTGTGAT
GSR_IOB_NIMR_206	scaffold02498-scaffold14669	KB664544	ASTE014252	GTTCATCTTAAGGTCAGGAAGTGAGTGCAACAGGAAGTGCGTTATTGCAGGTTAAAAAAATATATATATAAAGAGCTGCAACCCGGAAACGCGCCCATATTTTTTTTTGCTTGCTTCAAACTCATACTTCTATATCCCCCCATCCCTTAGCACGCGGGAGCAAAAATCGCGTTTTGTTTACTGTGATTCGTTAGTTTTTT
GSR_IOB_NIMR_207	scaffold00057-scaffold14856	KB664288	ASTE014736	GACTTTCGACCAAGCTATGCTAGACAGAATCTTGATCGGAGTAGGCTTCAGTAAGTAGAACCTTTAATTAATGAATAACGTGCGGTTAGTGTGATTTATCCCTATCTGTGGCAGGAAACGTACTGATAATGTATTTGTTTTCTATTGCAGGGAGTGATCGACAACTTGCATTGATGTGTGCCAAAGATTGCGGTGGATGA
GSR_IOB_NIMR_208	scaffold00057-scaffold14856	KB664288	ASTE014736-ASTE014735	CTTTCCAGCATAGCTTGGTCAAAAGTCCCTGGGATGGTTTTAGGCATTGGATTCCATTTCATCCACCGCAATCCTTGGCGCATATCAATCTATGCTGTCGCTTTCTAGCATTAAATGCTTAAAAGTCACTGAGATGATTTTAGGCATTGGGTTCCATGTCATCCACCGCAATCTTTGGCACACATCAATGCAAGTTGTCG
GSR_IOB_NIMR_209	scaffold00097-scaffold15352	KB664544	ASTE002291	TGGGCAAAATGTTTGGCAGCAAAATGGGCCTGCAGAAGCTGAACTACGAGGTAAGGTTTGGTGCAGGTGCGCCGCGGCACGTTAGCCAGCAGCCAGCTCAGCAAGCCCTACTAACCTCAACTTCTTCACCCAATCTCTTTCTTTATTTAGAACTTCTCCCTACAACAGTTCGGTCTGAACTCTGGTCGCGTCTCGATCGC
GSR_IOB_NIMR_210	scaffold00086-scaffold15776	KB664422	ASTE002605	CCAGCACCTTGTGCATACCGATCTGCAGCACCTCATCGGTTTCGGTAAAGCTAAGAGACGATGAGACGAAAGTTGAGGAACAGCTGGTTTTGCTACCGTACCCTTCCCGGTCCACACACGCACACACACAAGCACGCAAACGATACTTACACAGTGGTGGCTTTTCCCTTCTTTTTCCGGCCCTGGTTTGTGCCCGGTGG
GSR_IOB_NIMR_211	scaffold00081-scaffold15831	KB665154	ASTE010174	ATTCCAATTCGTCTGATTGTGCCAGCTAGTCAGTGTGGCTCTTTGATCGGTAAGTAAGATTGATGCTNNNNNNNNNNNNNNNNNNNNNNNNNNNNNNNNNGTGGCTTAAATTCTTAATGTATCCTTCATCCTTTTTTTCTATTACACAGGCAAGGGTGGCTCCAAAATCAAAGAAATTCGTGAAATCACCGGCTGCTCGA
GSR_IOB_NIMR_212	scaffold00081-scaffold15831	KB665154	ASTE010175-ASTE010174	TTCACCTGTGGCTTTGGCCGGTACGGGATTGTGGCACCCTTCGGCGGTGACTGAAAGGAGAAACAAGGGCGAAAGTTAGAAATGTTGATTTAGAGCATCGTTCCCATTCAATTTTCCCTGCTAAATACTGCCCAAACCACAGGTACTTACCTCCAGCATGACACAGCATATGTGATAGATGCATTGCGTGATTGCTTCAG
GSR_IOB_NIMR_213	scaffold00025-scaffold16009	KB665288	ASTE007780	GATAATTTCTTTGTTAGTTGCGTCTTTTTTAACTTTACCGTCGCTCATTCCTAAATAGTGTAGAAATAAAAACCAAAAATGTTATTAGTTTTCTTTTGTGCTCGTTTTACATGATAACATGCGTTCCGCTTTTCTTATTGCCCCCCTCACCTGAGAAGACTTTCCGCAGCTGCGATTTTGTTCGTGTGAGAATACTCACC
GSR_IOB_NIMR_214	scaffold00084-scaffold17660	KB664988	ASTE004731	AACCGTGATGAAGAGTGTTTGAAAAAGTCACTGATGGAGGTTGTGAAAAGGTGAGTGTAAAATAATGTGTAATTAAGGAATACGGGGGAGGGCAGCTTGTAAGTTCCTCTAATTTTTTTTTTTTTTCTCTCTTTTATACGACCGCAATAGCGATTCGAGCAACCTGTGTCGATTATGCTTGTCCAAGGAGCAAAAGCTGA
GSR_IOB_NIMR_215	scaffold00005-scaffold17948	KB664289	ASTE014676-ASTE005873	GTTGCATTTCGATTACGGTTACGGCGGTATCAACCGTTCATCCATCGGTTGTGGTTGGTTGGTTGATGCTTCGCCACTTATCCTCTTTCCCTACACTTGGCGCTCCGGAAAAAAGCAACATTTGTGACGGGACGACGGGTTTTTTTTTTGGTTGGTTGGTTGGTTGATGCCTCCGCAAGGCCATTTCTGCGTTTTTTTGC
GSR_IOB_NIMR_216	scaffold00099-scaffold18185	KB664529	ASTE014634	GCATAAATCTGAATGTGATCGTGTTGTTGTGTTGAATGTTTTGTGATATGAGGTTTGGAGCATAATGTGATTTAATAAATAATGATCGTTTAAAGAGAAAATAAAATAAAATTGTGCATTTTCGTGTGTGCGTGTGAATAAAATATGAAAAGTCGTACAAAATCGCCGAGCAGTCCATGCGGTGGAGGTGTGGGCGGTGG
GSR_IOB_NIMR_217	scaffold00144-scaffold18738	KB664511	ASTE002495	TCAACGACATACTGATGCTGGAGGACGACAATATGGTGATTGCCGGTCAGGTGAGTGGCACACGCGCAGTAAGACAACGGGCGTCACGTACGCCCCACGGTCTACTTACCTTCTAACGAGCGTTTCTACTCGTCTCCCGCAAAAACAAAGGTTGGCATACTCGACCTAGCGAACGTAACGAGCGCCCACTTCCTTCAGTT
GSR_IOB_NIMR_218	scaffold00025-scaffold22427	KB664656	ASTE011117	GGCAGTCTGGAAGGTATTGTCGTATAGCATGTAGCAGCAGATCATCGTTCCTGGGTAGACAAAGCGACAGAAAGAGAAACATAAGTTTAAAACAATTTTTAAGAGGAGGAGAGCGAAGCAACCAAAAACATCAAATTGCATTAAACTTACCCGTACGACCTTTGCCAGCCTTGCAATGGATTGCCACGACGTGAGATCTA
GSR_IOB_NIMR_219	scaffold00033-scaffold22478	KB664540	ASTE010622	TGCGCCGGTTCTGGCAGGGCAATGTGACGCACCGTGGGACGATAGAGAAGGTAAGCATCGCCAAACCGGCCGGCATATAATCCATCCTACATCCTCCTGGTCTTTTTTCTTCACGATGCCGCACGCCGCCGTTCCTTCGCCCCTCCGTAGCCGGGTCGCGTGGCCACCTTAATCGAGGACAAAGAGGTAAGTAGTAACGA
GSR_IOB_NIMR_220	scaffold00003-scaffold00976	KB664907	ASTE008897-ASTE015295	TTTGGTAGATAGGATTAATAGGATGACAACAGCTAGTACATCGGTCAACGCTGGCAGAAGAGGAGAATCACAAAGAAGAAGAAAAAGAAGAAGGAGAGATACATTTTTTTGCAGTGCCCTTAACCAATTCCAAATCCAGCGCACCCTTACCTGTTGCCGTGCACCCCGTACCGATGATACCCATGGTCCGCTGGCAGCAA
GSR_IOB_NIMR_221	scaffold00033-scaffold01383	KB664553	ASTE004181-ASTE008862	CGACGTGACGGCGGTCTCCTGCGCACGGTTCGATGCCGCCAGCTGCATAGGTTTGTCCTTGCTAGTAATGTTCATATCACAGTTTTACTCCGACAGACAACTTCACACGATCGTTCTCTCTAATGACGTCCGTTCTTCTCTTCCCAACAGAATGCAAACCGACCGCTTACCACTACAAAGGCCGCTGCTATATTCAATGT
GSR_IOB_NIMR_222	scaffold00004-scaffold08778	KB664498	ASTE014847-ASTE014698	TCCAATTTTTTGATAGCTGTCGCAACTTTCCACAGCGGGATTGCCGTTGACACATTTCACCGAGTGATTCGAAACGTTCCATTCTCTGATTCAAACCTCTTCCATTGTACGATTGCCACTCTCCACAGTGGGATTGCAATGTTCTTTTGAAACATTTCACCGAGTGATTCAATCGTTCTATTATATGAATCTAACCCCTG
GSR_IOB_NIMR_223	scaffold00073-scaffold01145	KB664488	AGAP004335;AGAP004335;	GCGGCTGCTGATGCTGCTGGAGGCTGTGGAAGCCACCAGCCCAGCGAGCTACGGGAATTCGATCGATGTAAAAGGGCACCCCGCAGTACTACCAGGAACTGCAGCAGCAGCAGCACCCTCGTGACTACGACGACCCGGACGCGGACGAGGAGGCAGAGATGGAGGCGGAGCGCGATTTGGCCGAAGACGCGCAGTGGAAGCGGATACAGCAAAACACGTTCACGCGCTGGGCCAATGAGCACCTGAAGATCATCAACCAAACAATTGCCAATCTCGAGAGCGATCTGTCCGATGGTTTGCGGCTGATCGCGCTAATCGAGGTTCTGTCACAGAAGCGCATGAGCAAACACAACAAGCGGCCTACCTTCCGCAGCCAGAAGCTGGAGAATGTGTCCGTCG…
GSR_IOB_NIMR_224	scaffold08858-scaffold07613-scaffold04940-scaffold00050-scaffold00062-scaffold00565	KB664734		CACGATCGACGTGTTCATCAGCGTACTGTAGCGGACAGTTAGGAAAAAACTCTTCGACGGCATCTAGTGATGACAGCAGCAGCGAGTTTAGTACTTCTTCCAAACCTCCGAAGAATCTGAAAGCAATGTGCAATGATCAGTGACGGTTGACAGATTTGTTGTTTAATTGAAAGGGTTTTCCTAGTTTACGAATGCGATCGGTGCTAAAACAAAAATAGCGTTAGAAGATCCCAGCAACACACAAAACAAATCAGGACTATTCTGCGAACGGGTGCAAATAGACGAAGAAAAACAAACAGGATGCTAGGACGATCTGACAAGTAGATGTTTCGATAGTGTCGGACAAATAAGTAGTGTTTACACGAGGCAAACACTGCGGGCCAGTGTTAACAAAATTTA…
GSR_IOB_NIMR_225	scaffold18326-scaffold17698-scaffold05350	KB664899		TAATCGACATAGTACGGTACGGGAAATGAGGGCGCGTGCATCCAAATTACCAAGGATTTGTGAGAGTATGATGCTAAATCACGCATACCAGCGAGTTGGCTGAGAACATCAGTTAATTTTGAACAGCAAAAGTGCAACTCTGCATTTCGTCTCGAAAGCGTCGCGGAGCAAACGGGAAGCAAGAGATGTATAAATACTACAATACAAGTGACTTATTAGAAGAATAAGTGACAATCTGCGGCGCGTGACGTTTTATAATTTCTATCCGTTTTGGATGATCGAACCCAATCTTGAGACCGCGAATACATTCGTCCGGGCAGAAATGGTCCCGTTTGCTCCACAGACACAGAAAACTGGCGACCCTTATCCGAAAAAAAAACCCCATGACCTCACGATGTC…
GSR_IOB_NIMR_226	scaffold03667-scaffold00090	KB664810		AAACCAGATGATACATCAACACATCCCTAACAAACACAACGGTAGGGCTTTACGTTAACAAATCACACACACACACACACAACATCGGGGTCGGGGTTGTTGGGTCGAGTGTATGGAGAGCAGTAAAGCGCGCGGAATGATTGAGGAGAACGCGCGGAAGAATACAAAAAAATTGGGCGATGAAATCTTACAAAGGAAAGCGTTAAAATCGAACGAGAATGTAATATTTGAACATTAAAAGAGAGACAGATAAAGAGCAAGCACGAACCTAATACTAGTGAAGGTAATAACCGGAAACCGTTTTAGTTGTAATATCGCTTCAACGAAGATTTTGTGGTATActctttctctctctctctctctctctctctGCCTTTGTGGCACTTTTCGTCCATCTTT…
GSR_IOB_NIMR_227	scaffold00055-scaffold11418	KB664531		TCCTTTTGATCTTTTTATTTCCAATACTATGTACAATGTTTAAGTGCACAAGCCGTTCTACGATTCTCCAGCAGCAACTTCTACTCATTCCCCCATTCGGTAGCATCATACCCATGCTCAATCACGCCGTGAATTCTATCATGCACCTACCTAAGAACAATTTGTTAATCTACTATGGTGAGGGGTTTTGCGTTTGGTTTTTGTCACACTCACTCACGCTTGTTCAGCATAACACGCTTTCACGCCACACTTCACTCATCACTTTCACAGTCTTTCTCTCGTGTATTGTAGAGGTTTGTTTAGATAGTTTTTAAAAGTGGTTATACAATGGTTTGTTGAATCGAATCTTTGTGTTTGAACCTTTATCTCTTGTTATCCAATAAGTTGTATCGGAATTAA…
GSR_IOB_NIMR_228	scaffold00084-scaffold02271-scaffold02493	KB664988	AGAP011766;AGAP011766;AGAP011766;	GATTGTAACACAGCCCCGCAATGGTGGACAACCGTGCCCACCGCGCATCGTCAAGCGCCGCAAATGTACCGGCCCACCGTGCAATTAACGGACACACACACAGCTGTTTGTTCGCCTGTTGAGTTGCAAATAAAGTGCGCACATCTGTGCTTCATTAGAATTCGGCAGCGTTTTCTTTCCCGTTCATTCAGCCGGCTCTTCGATGCAGCTCCGTCAGCATTATGATCACGCAATCGTTTCGTTTTTTTATTGCTTCACCTTCACTGCCGCCATTTAAACGCCAAAACCGCGTCGCGGGTCCACATAATTCATAAATTCTAGTAGCTTTCACTTCACAACTCTACCCACTATATATAAATATACCTCCTAAACAGTTCTGGCTCCTTCCTGGTATGCGCC…
GSR_IOB_NIMR_229	scaffold00062-scaffold10785	KB664444	AGAP004723;AGAP004717;	GATTCCAAAAAAATCGGAGCTCTCCGGATTCCGCCAAAACCGTCATTTTGCCTATCACTATACTGTTCCATTGGCACAGCTTTTTCCGTTCGACCATGAGCGAAAGGACTTTTGAACCAAGTTTAGAGCGCAAGACTGGTTGAATGCTGGATAGGACTGGTTGTCCGCAAAAACTACGTAGATTCATTTGTCAGTAAAATACGAAAATTTTGCACTGCTTGTTCGGATATAAAGTATCGTTTTACAAGAGATATTTGACAAAAATGATAATTCTAACCAAATATTTGTTTTATGTAAAACATAAGTAAAGTGTTGAAGACAAAAGTTTATTTTACAATAATTACATTCATTTTCGTATTTTGTTTACTTTTGATCATCGGTGTCATCATTCCCTTACAC…
GSR_IOB_NIMR_230	scaffold02107-scaffold00012	KB664621	;AGAP008282;	ATTACATTTATTCCATCAAAACTCTCGATTGTGCCCTTTCAGTTACAACTTACATATGTTGTCATCAATTTTCTTCATCTGCTTGTCGACCTCCGAGCTGTATCTGGTGCCCGGTGGAAGCTTATTAGCCTTGATCAGTTCCCTCAAATCAAACGCCTTCTTGAACGCGTCCGCCGAGGTGGATTTCAGCAAACACTTGTAGAACGCGTACGCTCGCTGGTTTGCCTGAGCGTCCATGGATTCACCGACGCACGTCTCCAGATTTATATCATGTTTACGATGCTTCTCGATGTCATTCAGCAGCTCATACAGCTTGTGATAATCTCCAGTTCCATCTTTCTCCACAAAATCGACCGCCTTCATGCAACAATCGATGTGACTGTACATGTCCGGTGTTTC…
GSR_IOB_NIMR_231	scaffold00055-scaffold00161-scaffold22428	KB664551	AGAP001944;AGAP001944;AGAP001938;	NNttttttttgttttgtttgttttgctttgtttGATGAGAAGGCTGAGTGTAAGGGTGTAGGTCTAAAGGTTCTGCGCACATCATCATCCACTCAGCAAGCTCCGGAGTAAAGATTTCAAATTAGTCGCTCAGATCATCGCTCTGATGGTTGTTGTTGCTGCTGTTGTTGGCGGCACCGTTGTTGTTTGTCTTGTTCAGGTTGCCAcctcctcctcctcctcctgctcctcctccACTAccaccaccgcctgcgccgccaccaccactgctgctgctgccagcgccaccgccTTCTGCAATGGCGGCTCCACCGGCAGCGGCCAATCCCATCACGCCACCGTATCCTGGTATGCCACCGATGGAACCACTACCGCTACTGCTTCCACTGTTATTGTGAT…
GSR_IOB_NIMR_232	scaffold00023-scaffold01092	KB665243	AGAP008755;	aactacgagcagagtttgtcaaggaagttagtaattgcagtccaagtcctctcgaggttctagagctaacaaagaagaggaaCATAGAGAGTTCCAGGTTTGTTGATCGCAATCTCTGGGCTAATTTAGAGAACCATCTACTGACCATGGAGCTctccagattttttctacacatacagggccttacatctttctgagcattttcctcatgaacgcagctctcgaatcctcagcattggacaacgtccctgtttcagagccataggtaagAGCCATAAAGATACATCTCAATGAATGTAAGCTTATACCACCTGAATGTATGCAAACTTGTGCATTAAAGTAGCTTTTAATCGAACTCCAAGAAGCAACCCTAAGAAGTCCGATAAAGACTTTACAATC…
GSR_IOB_NIMR_233	scaffold01205-scaffold00023	KB665176		AATATCTGCGCGATCGAGCCGTGGTATGCGAGACCTACCGAAGGGGTGCAAAACCCGAACCCACGTTAACAGCTGCGACCGAAGCAGCGTTGTGTCAAAGGCTTCTGCGGTGTGCGCACCACCAACACCACCACCAGCGCTACCGGTTTCGGTTCTCTCTCGTTCGTGCCGTGCGCATTGACGGTGTGAGACGGCTCGCATCGCAGTTGCAGCGTGTTAGTCCGATCGGTCGGTTCGTTATCTCCGGTGCTCTGGTTGCGTCCGTTCTTTTCGGGAAAAAGGGGCAACTGTTAGTGTGTGCTCAGCGGTGAAAAAAGCACTAGAAAATTGATTCGTAGCCGGTCGGTGTAAGTGTGTGAAACGGTAAAGTTGTGAGTCACAACAAAAAAAGGACAGAAG…
GSR_IOB_NIMR_234	scaffold00040-scaffold02078	KB664699	AGAP011438;AGAP011438;	ACCCTAGCAACATTCCGATACCAACCGTAGCCGTAGCCTTCAGGGACATTTTTATACGCAAAAGGAAAATGAGTAGCTCTGAGGAGGTATCATGGATTTCCTGGTTTTGCGGACTGCGCGGTAATGAATTCTTCTGTGAGGTGGACGAAGATTACATACAGGACAAATTTAACCTGACCGGACTGAACGAACAGGTACCGAACTATCGTCATGCGTTGGACATGATTCTGGACCTGGAGCCGGAGGATGAAATTGACGATAATCCCAACCAGTCGGATCTGATCGAACAAGCAGCGGAGATGCTTTACGGTTTGATACACGCTAGATACATTCTTACCAACCGTGGCATAGCTCAAATGATAGAAAAATATCAAAGTGGTGACTTTGGCCACTGCCCGC…
GSR_IOB_NIMR_235	scaffold00031-scaffold05564	KB665299		ATCATTTATCATAAAGGTTTATTGTTTTTTTTTTCTCATTTTACTTATGTTTTGTCAGCCACATTCTCAGCGTTAATCGCCGCCAGTTTTTTTGTTTGTTATCATTTTAACGATCACGTTTAGTTCTCATAGCTAAAATTTTACGAATGTGTCATTTTGTTGGTTGGAGCCTGTTTAGCTGGCAATCCTGTTATGTAGGCAATTAACACACACTCCATCATCCATCGCTCGTCCCCGCCAGCCCTGGGGGAGGGAGCTCCCCACCTCATGTTACGGTAATGCAATTTTCAATCTACTACACTTTCGTTTATCTAATTGTCGCGATTTTGGGTGCAAAGTTTTCGAATTTAAACAATCTGTGTATGCACTCGCTCATACATGACCAGCTGTTTGCGGGAG…
GSR_IOB_NIMR_236	scaffold01089-scaffold00004-scaffold02532	KB664448	AGAP000440;AGAP000440;	GGTGGTATATTGATCTTTGTTCTTTGTTCTGTATTTCCATTACTTCTGCCCTTCTCATACGCGTCACTAGTAAAAGAGCACTAAAGAGAAACAAGTCGAACCGAAAGTAAAAGCTTTGCTAATTGATTTATCTTATGGTGTTAACCACGCGAAGCCTGACTTATGCAGCACGGAAGCGGCCCACAACACAACGACCGTTGGGAATGATCATCAGAAAAAGGTAAAAAAAAACGGGGCCGTGAGCTATGAAACACATGAGTTGTATAGAATAATCGAAAAGTTTTTAAACAAAATTAAACGGTTTAACCATATTTCACCCAGAGCCCAGAGCTACATTACTTCGCCCGTACGTACTGCAGTGTATGTATGAATGTGTGTGTGTGTACATTAAAGTGAGTT…
GSR_IOB_NIMR_237	scaffold00003-scaffold02741-scaffold08651-scaffold19607	KB665165	AGAP003873;AGAP003873;AGAP003873;AGAP003873;	TTTGGCCCTGACGTCCCATCGTGGCACTTGCTGCGTGTTACTCGTGTTGTTGTGTTCAGTTGTATCAGTGTTGTTTAGAATTTTTCCGTCGAAATTGTTGTGTTGTTTTAAGCTAAGCGAACCATAAACAACGATCAATCTTGTGAATCAGTGACGAATGTGCGTAAGGCTCTTCGTAGTAGGCGGCGCGATCAGAGCATCCCACAGTGCGTGAGTGCGTGCCTGAGAGCCAACATTGCCGCCGCAACGCAACGCAGCACACCAACACACGTTTGGTTTGTATAGCGCTACACGACCATTAGCTGCCGTCGTCGTCGTCATTATTGTCTCGCCGTCCGTTGTCATGGTGTTTGGACGCAAAAGCATGGCTCCCGTGTCGTAGTGTAGGCTGCCCGCTAA…
GSR_IOB_NIMR_238	scaffold00489-scaffold15731-scaffold00031	KB664954	AGAP010893;	GCAGCCGAGTGAAAAACATTTTGCTCGCAATATTTGTACACATAATTTGTTGTAATTGATATAACTGAGAATGTGACTGATGTTAACATAGAATTCGCGTAATCTCAACGACACAAGCATGCATTGTGTGCAGTGACATGGGATTAAGGTACGTGTATGTGTACGTGAATGCAAGCATGAGTTGTTTTAAATGTAGCTGCGGATGCGACCGCCTCACCAGAGAAGAGCTGCTGCAGATCATTCAATCCACAGACAGGGCACGAGATTTTCTCAATAATAGCGCCGCTCGAAACATGTTTCGAAATATGATTTATCCCGAAGAGTCCGAAGGCTACACACCTCAACCTTCCGGCTCACAGAGCCGTCCCGTGGGAAAGCGTCCCATGCCGCGAGCCATCA…
GSR_IOB_NIMR_239	scaffold03290-scaffold03263-scaffold00133	KB664497	AGAP009774;AGAP009774;AGAP009774;	ATATGTTTCGTCTTTTATTTGACATTCAACATCCGTGTTTTTCCAATATATATAGTCTGTCTGCTCTACCATCTCTATGCTCTACTACCACGCACCACAAACTTTGGAACCGTACACACCCAATCAAGGGAAAATTCGCTCTACCACTATCGTCCATTTTCCACACAGTATCCATCCAGCACAGAACATCCAGCCTTCCCTGTATGCTGTCTCTTCAGTAAAGAAGCATGCCCTGTTGGTGGTTGGAATGATTTGGTTCCTGAACATGGTTTGTTTTTTTTAAACAAATCTATATTGATTCCCTTTTTTTTGGTATTCCCAATTCGTATTCGATTACAGTGTAGATTATTTGAAGCAATTCGCGCTTTGCAAAAACATAATATACGAAGCAGCAAACGC…
GSR_IOB_NIMR_240	scaffold03290-scaffold03263-scaffold00133	KB664497	AGAP009774;AGAP009774;AGAP009774;	ATATGTTTCGTCTTTTATTTGACATTCAACATCCGTGTTTTTCCAATATATATAGTCTGTCTGCTCTACCATCTCTATGCTCTACTACCACGCACCACAAACTTTGGAACCGTACACACCCAATCAAGGGAAAATTCGCTCTACCACTATCGTCCATTTTCCACACAGTATCCATCCAGCACAGAACATCCAGCCTTCCCTGTATGCTGTCTCTTCAGTAAAGAAGCATGCCCTGTTGGTGGTTGGAATGATTTGGTTCCTGAACATGGTTTGTTTTTTTTAAACAAATCTATATTGATTCCCTTTTTTTTGGTATTCCCAATTCGTATTCGATTACAGTGTAGATTATTTGAAGCAATTCGCGCTTTGCAAAAACATAATATACGAAGCAGCAAACGC…
GSR_IOB_NIMR_241	scaffold00111-scaffold10848	KB664422	AGAP005352;AGAP005352;	CACACGGAAAGTGTGATTTAATCTAGAGCTCGCAAAAATCCGAGCAGGGTAGAGAAGGGCAGTGCTAAAGAACCAAGAAACAAGACCACGGGCCGAACAAATTCCCATTTGCTTGTGGCTGCAGCCGTCAATTCGCCAGTGTGGTGTGGTGTTGTGTTTTTGTTATTGTTACATCTCGCACATTCTCCATTCGAGACCCCAACATGGAGCAGCGGTACGGCAGCTAGCGAAAAGAGTTGCTTCATTGTTGGTCTAGTACTCGCAGAACGGTGTGTCGCAGTGTGAGTGTATTTGTGTGTGTGTGTGGACCAGTGGAAACAGTCCGCTGGTGGTGGCAGCGTTGGCTTTGTGCAGCTCGGTTGGCCCTTTCGGTTTTGTGCATTCGAGATCCCGCGTGTC…
GSR_IOB_NIMR_242	scaffold00067-scaffold04534	KB665221	AGAP010778;	ATACTTCATACAACGCCCTGAACGCGTGGTGCGCGTAATGTTGTCCTGCAAACATTATCACGCCAACGTACGTTGGATGGTGCGAGGAAGGAACGGCCCCCCCCGCAGCACACCCACCCAAAGCACCCCCCCTTCCTACCATGCTTCGATCTCCACCGATTCTCAGATTCCAAGGGTGCGGTAGTACATTCCTAACGCTGTGTGTAGCATTGCGTGATTACAGATAGGCGAGAACCGAGTTGCCGTCTACTGCCAACCGATAAAAGCCTTACACGATGATGCAGCTTGGGGCGGGAAAATGCAAATATGCTGCAACCGTTGTACAATGGTGGTAGCGCCGATAGTAGTTGCAATCGTGCTGAGTTTATTTGTTTTGCATTTAATTAAAAAAAAAACACA…
GSR_IOB_NIMR_243	scaffold00011-scaffold05677-scaffold21098-scaffold04145-scaffold00026	KB664721		GCAACTTATTACAATATTTTCGGTGTAAGAAAATAAAAAAGGGCAAACACAGCATTCATTCATTAACCTCATGTTCTATATTTCTTTTCCAACGAGTTTTCCTTACTGTATAATTTACGATGCACTCGGATTAAACATAAAGTTATATAAATTGTATTACAAATTAATCAAACAGCAGCAGCAGCTCCGCGTTCTACGTGTGTTCAGCGCCGAGTAAGTGCTTATTTGTATGCAAAATTATTCATAAACAATAGTACATTAATTAGTAGAGATAGTTCCAGTAACATATGTGTTCAATACAAAACCGCAATTCCATTCTATGGATATCCTAATTACCGATACGTACCAGCGCAAAACAGAAGCTCGTACTACACCCACTACTGCAGCATACAGCTAGGC…
GSR_IOB_NIMR_244	scaffold00024-scaffold01806	KB664832		CGTCAAAACTCAATATGGCTGTTGAGCAACAATAACATTCGTTCCGAGAATCGTGTAAACATTATGGAAACATACAGAAAATTCGTGCTGTGCAAGCAAAAAGAAAGCTGATTCATCTTTACAAATTTAGCGTACTACAATTAAAAGTAAGTGAAGTGAGTCACTGTCGCCCTGGCGAGTCCCTCTGCGGTCCGTTGGCAAGTGCAAGTGCGGAACAATTATCGATCCGTTCGGAACGGGGGGTAGAAAAAAAAAACAAATCATCTCCACTGCGGACAACCAAGCGTCTGCAGACCGCTGGCATACAAAGGGGGAAGGATTGCTCTCGGGTTTCTGCGTACGGAATGCGCACAGTGAGCAGCAGTTATCGATCGGAGACACACTGGTAAAGTGATTCCT…
GSR_IOB_NIMR_245	scaffold16600-scaffold00025	KB664656		ATGGAGCACCGCCATTTAGGTTTGTTTCGCTGGACGCTGGTGATGGTTCTTATCCTCACCGTATGTCACAATACGACATCGGCCGTGGAAATTGTTTCCGGCGGTACGGGAAAGCAAGTTTCCGCCAAACACACCGCCAACGATCATGTGCGTGAAGTGCTCGGGCACATCTTCGGTCGGGACGATCGTTCGCACTCGGGCAGCCACAGTTCGAGCTCGAGCGATGAACGGGGCGAACTAGCGTTTCTGGTCCTGGCGCTAGCCGTATCCTGTCAGGGCGCGCCATCCGATCGTGAGGACATTGCTGGATCGAAAGATACCGCACTGGCAACGTTCCTGCAACCGCTGGAAGCGAAGTGGCGCGATGATCAAACCATCCCCGAGCGTCGTTCCAGGGAA…
GSR_IOB_NIMR_246	scaffold00332-scaffold00069	KB664533	AGAP005807	CAAACCCTGAAGCTCAACAGCAACAACCGCTAGCACCACAATATCAGAATCCGCTCGAGCAGCAACCGTACCAACCGCAACCCACTGAAGCTTTCCAACCGCTGACGGCACAACAGCAACAACCACTGTACCAACCAGCGCAGCCACAACAGCATCAGCAGTTGCCACCGACACTGATCACAACACTACGCAAAGAACCACCAATGTCTCAGGAGCCCGCTCCCGTCTATCAGACGCAACCGGTTGCTGCTATTTATCAAGGAGGTAGCAATATGCGCGGAGATCAAAAGTGGCCCCCAGAGGAATACAAGCGCCAGTCGGAGGTGGATAATGAGGAACGTCGTAAGCTAGCCCAGCAGCCAGCGTTTCGTCCACGCCGCCAGCAGAAGGACTATGCCG…
GSR_IOB_NIMR_247	scaffold04067-scaffold00067	KB664462	AGAP010817;	ATGGCCGACCGATCTTTCCTGCCCACAAACCGCAACGCATGCAACCGTACGCTGCACGGTGAGGCCGGAAGAACGTACGAGCTACAGATACAGAACCCCCACGGCGTGTATCCGTTCGTGTGTCACCTAAACTTTACCGCGACGGGAGGCCTCTACGGTGACATTGTGCAGTTAAATCTGGCCAAATTTAGTGTTGGGAAGTTTGTGGAGAATTTTCACGACCCCAAGCAGCACGGTGAGTGTATGGAAGGATTCATGACGATCAGCGAGCAGGGTCTGCCGCATCTGGACGGTAGATGGTGCGGGACGGCTTCCGGCTACACGATATACTACAGCGAGACGCGATCGGTCAATGTGACACTGCGGCTGGACAAACTACCGCAGGCGAGCAGCAGCGTG…
GSR_IOB_NIMR_248	scaffold00198-scaffold13691-scaffold03174	KB664510		CCGAAAGATCTCATTTATTTTCATTTAACAATGTTGTACAAGAATGAAGTACGTACGGATATTTCAATACAGGACACCGCTCTGCTCGGAACTTCAAAAGCCCTTGAACCACTTGAACCATGTTGTATTCCATGCTTTCCTCGCAATTCGTCACCTCTGTTTCACATAAACAGAAGAATCTTTCGAGTGCTTCCCTCAACACTTCTACACTCGCACTCGCAACAAAGCAACCATTGCTTTCCGTACTCTTCTTCCCTAGCATAAACATGGGCTCGTTTTCGTTAATAACTATAAACATTCGAAGAAGCAAATCCAGCAACCGCAGGAACCGAGAATTAGCTTACGGGACAATATTTTCTATCGCAAAAAAAGATATACGTGCGCTTACAGACAGCAGCA…
GSR_IOB_NIMR_249	scaffold01743-scaffold00010	KB664525		CCCACACACAGGTGCGCGAGTTTTCCGAAACTTTCCGACTGGTACCGAGCGAAGCAACAGTTCCTGTGATTGAGACACCAAATAAACATCCGCTACAAAACTATGATTTTTCAAATGTAACCGATATTGTGGCCGTGGGTTGTTTTGTTTTTTGCTGCTCCTTTCGCAACCAAGAACCGGAACTGTTAAATCCGGTCCAGTGTACGCGCGTCGAAGCGGGTTTGCAAAGGAAAAAGGAAAACAAACTGATCAGAACTGGCTGAGTGTGATTGCCGGTGCAGTGTGCTGTGTTGTGCGGTGTGAAAAATGTGTTCCCATTTTCTTTTTAATGAATCATCTGAATGAATCAATCAGACGCGAAACACGAGCGTAAAGTGCGTGATCAAGTGGAAATGTAGT…
GSR_IOB_NIMR_250	scaffold01219-scaffold00121	KB664799		TGGTAATTCCGAAAGGACTCGAAAATGGAAAGCTGATACCCTTAGTAGCTGGGTCCGATTGATCGAAGGAGGTTTGAAGTCGTCTTTGTTCGACAAGTGAATAAGGGTCGCCTTCAGCTATAAAAAAAAGTTCAGATAATCTTTGATAGAGCTGAGCTTCCATAGGCCGTTACCCGACTCGTAGACCAATTGCCATTCTTCATTGCAGTTGATGAGGATTCGCAGTTACCCAAGGTATTCGACTCTCACATTTCAGAAAGTGGTACGAAATATGCTCGAAGGTATGGATATTCGAAAAGAAGAAACCCTCATGAGAGGAGAGGATTCTAAACCCGATTTTGAGAGATTGCTCAGACATAGATCGTTTCATTCGGCTTACGTCAATAGCGCCACGCTGAA…
GSR_IOB_NIMR_251	scaffold11454-scaffold00285-scaffold05042-scaffold09244	KB664806		AACCAACATGCTTATCAACCTGTTACTCTTCAATTGCCCAACGTTCATGATGGTTCCACGTATGAGCTGGATTATAATCATCTCACTCAAAATGCTGGAGAAAATGAAAATACTCTAACAACAGAATACGGTGATGGAGCAGATGACAATGATGATCTTGATGAAAGCATTGACCACGTTGTCGATTATCTAATTGAAAGTTCTGATGAAGAGCTAGAAGATGAGCTATCTACAAAAGAATATTCGGTACAAGATGCCTTACGTCGCTGGGCCATATCCAAAAAATAAACGTACGAGTCGATCGAGGAAGTAATGGAGATAATACGGAAACAATGTAAAAGTTCCAACCAATGCAACTCTTTCGATCAATATTTCAATCGATGGGTTACCGATATTCAA…
GSR_IOB_NIMR_252	scaffold02769-scaffold00004	KB665310		gggaggggAAACAAATGTAATCGGTGCATTTTGTGAGACACAATACAAGGGTGTTGATGAGCGGTGGGGTGAACGCACGCAAACAAATGGAAAACCAGGAAAAAATATCGaaaaaaaaataattaaaaattaaGACAAAAGAAGAAAAACTATAACTAAATGTGACAAAACAAGAGAAAACATTTgagagtgagaaagagagagcgataaagagagagagagagagaagtgacagaaagagaAGTAAAAGAAAGGAGAAAGTTTAAGTATAAAAAACGAAGATGGAATGAAAAAGAGAAACACACAAACACACACAATCGAACAACAAACTAAACTCGAAAACACACTTAACAAACGGTAACAAACGAATTGGTAACAACGGTATAAAATTGGCACACA…
GSR_IOB_NIMR_253	scaffold00094-scaffold00516-scaffold01700-scaffold00807	KB664810	AGAP008742;AGAP008742;AGAP008742;AGAP008742;	ATAATTTCTCTCCATCGGTAATACATTTTCAATTGAGTTCAAAGGTGTGTTTTAGTGTTTTTTGTCAATGTGTTTCATAAGAAGAAAATAGAAAAAAAAATATAAAAGCACAAAAAAAAAACAGTTTAAAGGAACAGATGAAACTTACTGATCGCGCGCTTCTTCTCCCGTCGGCTCCTTCCTTAATATACACAGGAATAATGTTCTTTACAGTGCTACTTACATTTGTTAGTGTGTGTGTGTGTTTACGTGTCGTTTACCGTATGCTTACACCATTAAGGGTAGTATCTACTCTACTTACAGAGTGTGTGTATTTGTGTTTGTCTGTGTGTGTGTTGTAAAACCTTTTTTTACACATGGCATTTGCTTGATTTGGTTTTTCCACTTTCATTTGTCCTC…
GSR_IOB_NIMR_254	scaffold00198-scaffold00111	KB664510	AGAP005394;AGAP005394;	GATCGATTGGAGAGTTTTATTTTCTACCTAGTTGTAAAAACACATCTTAAAAGTAAGTACGAAATTTAAAAAAAAAACCTAACTCGTGCCCTCGAATTAATTATCTAATCATCTAAACCCGAACAAAACGTGTATAGAGAGAGTGAGGGAGCAAAAACCACGTAAACGATAGGTAAACTTAAAAATTGTTCTACAAGTACACAAAGTACAATCACAACAAGAGCCCTGTTTTTTGTGTGTGTGTTTTTAAGTGTGTCTACTACTTACAGTAACTTACTGGGCCGTTAGCCCCAAAAAAAAAGTGTATAGTAACCGGCACCACCGCAGAAAGGGCTTGGGCTCGAAAATATGACCTCTTTGTCTAGGGTATGATGGTCCCGGATGGACGAATGGGGTGCG…
GSR_IOB_NIMR_255	scaffold01203-scaffold00119	KB664523	AGAP003735;AGAP003735;	ATTAAGAAAATGTAACATCTAAGAAACAACTAGCACTAGAGGGTAGAGCCAATGTGAAATGTTTCGGAAAATAGGCAGTGGAAATTGACAGATCGAGAAAGAGGAAAAAAAGAACAGGGCGAACGCTTTCTTTCTTTAACGAGACTACATCCAGAGTACAAGTGTGACAGAGCACAAAAAGCGATAGTATATTAACAAGTAACGAGATCAATTCAAACATAAATAGTAAACAAAAACACAAACAAAACGTAACACAAAACTAGGTAAGAAAAGTACTAGCAAAAATTAAAAAATTAAACATAAACTTAAACACAATAAAACTACAAAATTTCCAACAGCTTTCGTTCCTTTTCAGCAACTTGCAGTTTACCGCACGCTCTGTTGACCCTATCAGCTTTA…
GSR_IOB_NIMR_256	scaffold01855-scaffold01890-scaffold00061-scaffold11678	KB664733		TAAAAAGCGTTTCTGTGGAAAAGACAGACAACAAAATTGAAAATGCTCGTGAAGATCGTGTGCCAGACCTAGTGCAAAGTATAAGGGATTCTTTAGATCAAAGCGATGAATGTGATGAGATGAAAGAATCAAACCATTTTGATCTTGAAGCTGCTAGTATGATGGCCACGCATGATGAGGGTCAGCCGTCAGCATTATGTTCCCAACCGTGCACCCGGATCGAATTGCCCAAGCACGAAACAAGCAACGGAGCGACTCCAGAAACACAAAATTTAAATACCTGGGTAGAAGCTGAAACCATCAACAAGGATTTGGTAAATGAATCACTTAGTGAATCGTCAGCAACACAACCAGCCGACGAGCGGAGAAAGATCTCATCAGATGCAACGGTTAACGGCA…
GSR_IOB_NIMR_257	scaffold07954-scaffold03869	KB664464	AGAP007857;	CTAAGATTGCTCAGTGTTTTCGTTGGAAGCATCCGAAGCATTGCGCTGTGAAGCGCTTTCGTCTTCTAAAAGGTTGCTTACCTCTTCCATTACTTCCTCGTCTGACACTAGCACTAGTTCTATTGGTCCCATGGGCAGGTAAGGTCCGGCGACGCTACTGTAATCTTGCTGCTCCTGCTCCGGCACGTTATCTTGCTGAACTGACAACTCTGACGATTCTGAGATGTTGGATTCTATAGGCAAAGCTTCATCGGCCGATTTCATTTGTTCTGGGCGGCTTGCTTCCGGTTCATTAGTCGCCGGGGAACCGTAGCGAGTGTGTAGCATGTCAAGCTTCGTCGTGAGACTGCTACCCCGACGCATTGTTTGATTCATTTGCTTTAGCAGCTTCTGACTTTC…
GSR_IOB_NIMR_258	scaffold00075-scaffold03548	KB664475		TTCCTAGAGCATTTCCCGTGCTAAAGAGAGCAGAGAGTGGCGACCAAATTCACCCGAAAACATAAGCCAACGCTTTCTGTCGACTTGGCATGTCGCTTGGTGCGGTAGGAAAATTCAGTTTCTCTCAGGCAGCAGCGCCAGCAGGGCGTTTTGCTCGTAAACCTACCAAACTTTCGGACCTTACCTTAGGGATTCGTTTTTCCCCCCTTTTCTAGAGCCAGTGAAAAACGGAAGACAAACAGGCAGTGCATACTGCTGGGGAACGCGGCCCACCCGAACCACAGCAAGGGAGGGATATTCCTGGTTTTTTTATGTCTCCTACTTTTCTTTTCACAAAAAAGGAACCACAAATCTGAGTTTTCCTTTTCTTAAGTGTGTGTGTGTGTNNNNNNNNNNACT…
GSR_IOB_NIMR_259	scaffold07198-scaffold00039-scaffold10828-scaffold12201	KB664439	AGAP005724;AGAP005724;AGAP005724;AGAP005724;	CGGTTCACAATTTGTGGTATGTATACGTTTGAAAACTTAAAGCATTAACAACTAATAACATTCACGCTAGCCGTTGAAGGAGGTTGAACAAATTTCAAATAAAAAACCCACATCAGTTCTCATAAGCCTACTTTTAGACAGACCGTCAGAAACAATCAGAATGAATCCACATCCGAAAGCATCGTAAGAAACACAATAAATCTTTCGTTTCAGTTTTTCTTTTTCTTCTTGTGAACGACTCGTTAAAGCTTGAATAAATATGTACTTTACTCGTTGTAAAAATATTAACCTACTTTCGGGACTTACTACAAAGCCGGATAGCTTACACGAATAGAGGTTCCTATATCTTCGGGATGTCTTGCACTAAAATTCGTTGCCACCCTGCGGCATGGGTCGTCG…
GSR_IOB_NIMR_260	scaffold15742-scaffold00013-scaffold04150	KB664426	AGAP002707;	ATATGCCCTTTTCCCAAAATATCGGAGCGTAAGAGCACTGCTAATTTCTTTCTTCGTCCATCTGACGCGTTTCTTTTCTTCCGTAATCAAAGCAATCTGATTTGATGATAGTGTGCCTTGTAAAAGGTTTTTCATTTTGTCAATCAGATCGTTCGGATGGATGCAAGAATTCTTCAAAAAGTTAAGTTCCTTTTCTAAATTTAAAACTTTTTGTTTTAGTTTAAAATTTTCAGAAGTAACGTAGTTTAAGGTTGCTTTTAATCGCAAATTAGCTTCTCTAAGTTTCTGTATTTCCTGAGAATTGTTTGTGTTCGTGGATTGCGTTGTGCTTACGGATGCATCATTGCTTGCCGTAACAGGAATAGATGTTAAGGGAGGAAAGTTTTCCAAATCTTCCTC…
GSR_IOB_NIMR_261	scaffold03311-scaffold00004	KB664448		GGGGGGGGGGGGGGGGGGCTGCTTCGGCGCCACAGGATTGGGAATCCAAGTCGGAACTTACAGATATAGAGATAGAGATATATATACAAGCACACTCGTGCAATAAAGAAAGTTTGTACAGTAAGGAAGAAAGAGCGGGAAATAGGTAGGGAGAGAGAAAAGGGGATAGGGGGGAGGGGCACTTCACAAACCGATCCAGTCAGACGTCCTAGTTTTTTTTTTCCTTCGTTCACGCGGCATGTCGATTGCCCTAGAAGAAGAGCAATTGTCAATTGTTTAATTTTAAGTGGGGCATTTGTGAGCGTTTGGGGGGTTTCTTTAGATATGGTTTTGTCGTTTTACGTCAGATGCTTCAATTTTCCAACAAAAAAAGGTAGTTGCGTATAGGCTTAGGTCCTG…
GSR_IOB_NIMR_262	scaffold00079-scaffold12641-scaffold00674-scaffold14361	KB665132	AGAP002399;AGAP002399;AGAP002399;AGAP009774;	CCGTACAACAGTACAAGCACATGAAACAGTAAATACTACCACCAAACACCGGAATTTGAGGACGAGAAGCGTGATATCCGCAACTCGACTGCACTGTTGCTGCGCCAGCTGAACGATCCCGTTCCACGCCTGATGGCCCCGATTGCACAGGCAGCTCCAGAACCGAACCCTAAGAAGTGGGTGTACGATCCGTTCTCCACGCACAACCGCCTGAACAGTGACACCTACGTCAAGAGCCACATTACCGATCCGATTCGCAGCGTCCGTAACGATATCGAGGCCATGGCCAGATATCACTCGCCAGCGTCGCGTTATGTCGTTCGCCCGACGCGCAAGTTCAACAACCCGAAGCTGTACGACGATCCGACCGATTCGAAGCTGAAGGACAAGCAGGAGAAG…
GSR_IOB_NIMR_263	scaffold01267-scaffold00020-scaffold00013-scaffold05286-scaffold09002-scaffold00283	KB664510		atttagaaggtgaatttttgtcgatttggcaggtagacattttggattttggccggtcgagaaacttcaaagtttgtttacttaatcatatggtttgggactaccaaaataaacaaacataaagcatcgtttttcggttcAGTAAACCAAGTTTCTACATTTATCATCGTCGTTGCACATAGCACTGAAGATAAACAGTTCCTTTACCAGCTCTAAAAAGAAATTTGCGTGACGTTGTTTTCTTCATACAGCTACCAAAGGCCTATCGGACGTATCGAATTACGGCATACCACTCGATAAAATTACACTGGTAGATTAAGTGAAGCTGTTCGATTCTCGTGCTAAGTACCATAAATTACAAGGAATAGGATAGAATTGTGCCGCATCCACCTCGAAACC…
GSR_IOB_NIMR_264	scaffold00144-scaffold06150	KB664511	AGAP012164;AGAP012164;	TCACATAAATCCATCCGAAACGATCGTCGACTCGTGCGGCATCTGCGTGTCCGTCGTTAGCTTGATCTGCGATATCTTCGTGTCCTTCGAGGGGCTGGTCGGTGGATTGTCTGGCAGTCGGCGCGCCTGGCACACGAACCAGCTGGAAAGGTTGACCATCTTTTCGTTCGTACCGCAGGGAGCTCGCGGTTGGAGTCGTCCACCGATCGTTGCTATACCACGTCCGGCGTCTTTGCCACCGTTCGGATGGACCCGATTGCTGCGTCCTTTGCCACCCGATGGGCGTTTGCTGGCGAGGGCGGGGATGCACAGCAGCCGCGAGAGACTGATTTTGCGGAACGCTTTGCGAAAGTTTTCGTTCGTTAGGCCGTAGATGAGTGGGTTGAGGGCGGCGTTCAG…
GSR_IOB_NIMR_265	scaffold04745-scaffold11970	KB664920		CGGTGAAACACATACATCTTCGACATGCCCGTTAGCGAAAGAATGTGAGGACGGTATAATACCGACGCACAAGTTAAAGTGTGCGAACTGTGGCGGTAACCACACAGCCAACTACACGGGCTGTCCTAACAGAAAAAAGTTCGAAGCTACGCAGACAAGCCGACGCACTACCACATCTCAAACAAGGCAGGTAACGCTCTCGCATAATAACTTTCCTCTCCTGAATAACCCAAACTCTTCCCAGTCCCAGTACCAAAGAACAGAAAAAACATATAATCCAAACACACGCATTCCCCAGTCGGCATCATACGCAGATGTTACCAATACTGGTCAAAAAGATCTCTTCGGACCAGATGAGCTGGCGCTAATAATTACAGAAACGTTTTCTAATCTTCGAAA…
GSR_IOB_NIMR_266	scaffold01265-scaffold00002	KB664899	AGAP004284;	ACATATGACACTGGTCCACTTTATTTCATTTTCCACCGTCGTCTGCTGGTGTCCTATACAATGCGCCGGAACACGTCCAAATTTTCCTGATCCAAAAACAGCAAGTTGAACACATCGTTGTAAAAGTCCGGATAGTACTCGCAGGCTCGCTGACAATCAGGGGTAAAGTTCACCTCCAACAGCTTCGGCTGTATTCTGCTGCCCGCTTCCGTCCACTCGAGCATCAAATCGACCGCGTAAAGTCCACGCGATTGGCTACTGGCGCCAATACCGCACGGCGGTCCTAATCGCGTCGCACCCTGCAGCATCTCCTTCAGCATCTCACAAATGTCCGTCTCGATCTGGTCCCAGGGATGGTTCGGGTACTGTGCGCGCCAGCATTGCACAAACTCATCGCAC…
GSR_IOB_NIMR_267	scaffold09049-scaffold00060	KB664510	AGAP002513;	TTTTCCCCTTTGAGAATATCTAAACTAAACTCCTACATCAACCGGCCATATTGGTAACACTAAAAAACCATCGATGAAAGCCAGCTGGAGGTGACCATCACGTGCCCGAGACCATCTTGAAAAGCCGTCGGCGGATACCACTAAAAGCGACACCCTGCAGTACGCAATGTGCCCGCTGAGAAATTAGCCTACGTGCGTTGTTTAGTGTGTAAATGTAGCACAAGTTCCGTTTTCGATGCGGGCGCCACGAGCCACCAAAGTACTTCACACCAGCCCCGCATCCCTATTGTTTGCTCATTTTCTACAACCACACTACTACTAGGCACCGAATATACGCGGGAAGAACAGGCCGTCGTCTATCTGAGTGTGTGTGTGTGTGTGTGTGTGTGCGTGTAGAGC…
GSR_IOB_NIMR_268	scaffold00100-scaffold07151-scaffold00800	KB664511	AGAP012185;AGAP012185;AGAP012185;	CTTCTTCTTCGACTCGGCGGatcatcatcatcatcatcatGAGTTGAAAGATGTTTAAATTTTGTAGATAAAGAGGAAGCtttaaaataacataaaaataaataaaataaataCTAAATTCGGAGTTTTAAAACGAGAGCACAAAAATAAACAGAACTAAATCAAGGAACTTATATTTAGACCATTAGATACTTAACAATGTTTAAAGTGTATTTCGATAAGGTTAAAAACCACGACGAAACGCGTTCCGCCGTAAGCGGTGTCTGCGCGCGCGCGCACaaaaaataatatatttaaattaaaaataGTATAAACTGAAAAACAAACGGGGCAAATATATTACTTACGGCGACGAACCTAACACGGGTAAAGGATTCGCAAGGTGATGTGTGTACGTAC…
GSR_IOB_NIMR_269	scaffold00016-scaffold06604-scaffold16272-scaffold11440	KB664450	AGAP004205;AGAP004205;AGAP004205;AGAP011765;	TTAGCCCTCGAAAGTAATTTTCGTACCCGCGAACGGCTTAATTCCACTCTGGGCCTGTTTCGCTGCCCAGGACGGATGGAGATCCGACGAGATGGTCGGCGGTGCACTCTTAACTCGTCTGGGATAGGTTACGGAAGTATTCGAAACGCTCAGCCCCAATCTGGCACGGAATTCAGCTGCTGTGTTGCTGGCTGTTGCATCTGGTGCGGTGGGGAAGCTTACCGTTTTCCCAGCGGAAGGAAGATTAGCTCTTTGCGCTTGCTTTGCGGCCCACGAAGGATGAACATCGGTCGGTGGATGGGAACTTGTGCCTGGTTGCATCGGATGGTCACTGTTGCCAAAGCCGTCCGTATTTCCATCGCCGAAAACGATCTTCTTTCCAGCGAATGGCTTGATTCC…
GSR_IOB_NIMR_270	scaffold00332-scaffold00069	KB664533	AGAP005807;AGAP005807;	TGGTTTGGTGTTTTCCATCCGCGCTTTTTCCCCGCAAGCTGGATTTTAAAGTTTTAAAGTGCAAAGTTGTGTAGAATAATTTAAAAATCTATTCAGTGGAATCTGCCCCTGTTTTCCATCTTCCCAAACAAGTAAAAGCATCATTACACCACTACAACAACACGTAAGCAACCGGGCAAGCCCACCTTCTTCCAGAAATCACTCAGCATCGAGGATATTCGACCACCATTTGTTTAATTTGAGCACAAATCAAATTAAAACGAAGCAGCGCAAAGTTTGAGTGAAGCAACCGTCCAATTGATTGATTTTTCGTTGCGCCGATACCGAAAAGTTGTCTCATCTTGAGCGAAAGTATGGCGGCGACGCAGAAACGACTTGTGCACAAGCAGTTCAACTCGC…
GSR_IOB_NIMR_271	scaffold01354-scaffold00025	KB665201	AGAP010012;	TATCGGCACGGCATCTCCATACGCCTTACGCCTCTTCAGCATACCACAAGACAAGACAGTTAATGAAGGTAGCGAATGTGTGAGCTGCGCTAAGACCACTTACACACTTAGTCATCGGACGCTACAACTGCTTCGTGGTCTTGGCCTGTTGCAATGATCCTCGATCCCGTGTGAAGACCGGCGCCGTTATCGCCTCGGCTAACGGGACCGCCACGGAAGATAGGCTACAATGGAGCAATTGTAAGGACTTTTCCTAGTGAACTATTGCAAATTGTTGGTTAGAAGATTCGGTTGAATGAAAGGAAAAAGTTCGAACGAGATAGAACTCTTTAGGTTTGAATTAGATTAATCTTACCTAACGTCAGCCGTATCCCAAGCCTTGAAGCGTCGTTCGTTTAT…
GSR_IOB_NIMR_272	scaffold02884-scaffold18868-scaffold07084	KB664777	AGAP008166;AGAP008166;AGAP008166;	cagtcctcactacggaggaacggcccggatgggatttAGAGTAGCGAATGGTACTTAGTGCTTAAGTAAAAATATTTTCATTTATTCATTTAGTTATTGTATGGGTCTTGCTGCGGATTTGGTTTTTTCTTCATTTCATTAATCGCCTAATTTTCTTACACACACAGAGAGACAAACTGACAAGCTACACAGGACGTCTTTTTCTTTACTCTCGCAGTATGATTGAAGATTGCGCACTTCGGAACTGAAGCGCTTTAGGAAACTGTTCACGATACACGATATATAATAGGAATGAGTTTAAAAATGGTTGTCTTTTGAACTGATCAGCTTGAAGTGAGAATTGACTAATACATATACAAAAAAAAAACTTATCTACTACGCTTGCTTAAGCGCAACGTT…
GSR_IOB_NIMR_273	scaffold00144-scaffold06150-scaffold18738	KB664511	AGAP012165;AGAP012165;AGAP012165;	CGATAATGAAGTTCACCGTCCGGTGGCGTTACCAATCGAGGTAGCCGTGCGAACCGAAACGGGAGATCCAGTACAGAGGCCACCATTCCGCAACGCGGACGTTTCTTGTGTGTTGTGTTGACATAGGGAGACTGAGTCGGGCGTGTGCGTGCGTGGTTGAGAAGGATTTGATTCGTGGAAAGACCTAGCAGCGCCTTGAACTTCACATCCAAAACACGCGCATGACCTTCAAGACTTGTCTTGCCTGGTGCGAGTACTAGCCGACCCTATTCTCTGTATCGCAGCTTATCGCTATCAGCCGCCCCGAAAAAATCGATAATGCCGAACCTTAGGCCACTGTCTGCCGCGCTGGCAAAGAAGGCTGCGGACGAGCTGTTCGAGAAGCCGGAACGGATCGAT…
GSR_IOB_NIMR_274	scaffold00036-scaffold00412-scaffold00789	KB665043	AGAP012012;AGAP012012;AGAP012012;	AGAAGCAAACATAAATATGAATATTACAAATCAAGGAAGAAACGGTCGTTTTCCCGAGGAGTACGAGATAGTTGGGGTAAGTAAAAGATATTTTTAAAACAACTGGATGACTTTAACTACATCTTGTGATGATTGTGTGTGTGTGTGTGTGTGTGTGTGTGTGTGTGTGTGTGTGTGTGAATTATTTTTCAATTGAATTAATTTTCTAGATGTGTTTAGACGATTAATTTTATTCGTTCTCGTTTTTTTTTAAATCGAATTACTCTGCATTTTTACTCTTTTCAGACACGTAGTACAATGCTATGCACCGATCTGATCGAACTTTTAATAGATTAATTCCAGTTCCATACTTCTCTAAGCTTTTTTTTTCATTATACAAAACAACCGTCTGAAACAAGC…
GSR_IOB_NIMR_275	scaffold00004-scaffold00037-scaffold18410-scaffold16233-scaffold15505-scaffold13113-scaffold17425	KB664480		CTTGATGTACAAGTTGTGTTCGTTGCGCAGTGCTGTCTGCCCAGCACTGTGTATTGCCCAGGTGCCCATATACTGCTACGGGTAAACCACACAGTCAAGGAACCCTCTTCTGGGTGGTGGTTGGTGCAGTTTGTGAAGCATTTCTATTCGATCCTTCGATACAATCGTAAACTGTGTACAATTATCAGACCAAACCATGTGTGTTGTGTTGTTCACGGGCAAAGCTGGTCCCTGGAATGCGGAATGGGAAGAAAACAAAAGTAAGCTTTAGATAGAAATAAAACTACATTTCTATGTAATTGAAACAGTGGCCGTGCAGTGGCTATTTATTGTTTATTTTAAATGCGTAATGGTCTAACGTAATGGTAAAGTAATCCTCCTTGGCCACCTCGTTCTCGT…
GSR_IOB_NIMR_276	scaffold01185-scaffold00031	KB664527	AGAP003753;	AAAGGAAGAGGGACCGTTTTTGCTTATAATCGTTGAACGAAATCGATCCATCCGATAAGATAAATCTTACTTCCATCAGTACATCAGTGGCGTTGAAAGTGGGGTTTTTCTTTATCGTTTTCCTTACTCCAATGTACCGATCGGACCGGCGGGTTGCTGTTGCTTTCCCCATAGCAGATTGGTAAGCGTCTAGTGTAGTTCAGTGTATCATTCCCGGTGGAAAAGTTGCAATTAGCGGTGGAAAGTATGGTGCTTGAAACGAAATCCGACCTGTCCGAGGAGCAAGTAGTGGCGGTCGAATCTGCTCCCTTCATTGAAGAGACAAGTGAGAAGGCTACTCGTGTCGCGGAAGAACCGGCGAGCGAACCATTCCATTCCGGCGCACCAGAACTCGATGGC…
GSR_IOB_NIMR_277	scaffold00017-scaffold01564	KB664555	AGAP008468;	CTACAAGATCAACATGCAGACGAGCTTGATGAACGATTTGCGGAACAGTTTAGAGGCGACCACGGCACAGATAACGACACTGACGCACCAGAACCAGAGAAGCTGACCGAACAGCGAGAAGCCGAGCGGAAGCAGTACGAGTGTAAAATACGGGAACGGGAGCGTGACATTTCGAAGCGTAACGATCTGATACAGCAGCTGGAGCAAACGCTCGTGCAGCGTGACAGTACGATCGAAACGCTCGAGTCGGACGGTAAGGATCTGCGCGAAAAGCTCAAAGATCGGGAAGATCGCATCGCACAGGTTGAGTCCGAGTTGAAGGAGAACGAAAAGATACAGCAAGCGATTTTTCCACATCCTTTGTATGGCCTGATAACAAACATTTTCCTACAAACATTT…
GSR_IOB_NIMR_278	scaffold00824-scaffold00124-scaffold13812	KB664799	AGAP006441;AGAP006441;AGAP006441;	GTTCGTTTCGAGAGCCGCCGCTGTTTCGACGTCGCGCCATACGAATTCGCCTTTCGAATCGCCCTACCAGTGATCGGTGACCCTGTGGTGATCGGGCATTTTCGGTGCGCCGCGTTTGTGAGCCGTAGCAAGAGGCTTCGGAAGTTTGGTGGTGGAGTGTAGTTTTCGCCCAAACCAAAGCGGTGGTTGTGTTCTAGAGCAATAGTTGGTGCTGTGTCCCTGCAAAATAGCTGCAACTTACCCGCCTAGTATTATCGTTCAGTATTAGCGTATGCTGTGACGCACTTTTGTGATAAGTACTCCAGCACAGTAACAGCAATAAAAACAACCTCCCAATTCGCCATCATGAAGGAAGTACAAGCTAATGGTCATCTGCATCTGAGCAACGGAAACGGTACA…
GSR_IOB_NIMR_279	scaffold08681-scaffold00010	KB664477	AGAP007064;AGAP007064;	TGACAGCCAACGCAGCAGGTAGAAAAAAAAGAAAACATTTTGTCTACGTGTTTTGAAAACGTAATCTTATCAACAACAACCGCAATACCAATCGAATAATATCGGACCGTAAACAATTTTCCAGCAAGCTTCTGTTCGCACACCGACAACAACAGCATCATCGAGCAAGAATGGTTGAGCTAAGTTCCAGCACCGATCCGTTCCAGCACGGATTTCCAAACATTGTGTTCATCATCCCGGCAATTGTCGTGGTGGGATTGGGAGTTTTGCGCTTTTCTCACTATCACCAAAAAATGGGAGACGTGGCAGAAGAGCTGTTTAACGCGGTGGGTTCCGACGGTGCGGTACCGGCAGCCGACGGTGCTGTACCGACCGGCGCCGAGAATCCGTTCAATCCGG…
GSR_IOB_NIMR_280	scaffold03440-scaffold00074	KB664999	AGAP001923	TTAGTTTATTTCACATCGCTTTCCAGTATACGATACAACAACGCCCTTCATGTGCTCCGCTAACGTCCCCAAATACACTCTTTCAAGATTCAACTATTGCTCTATAAAATACATCCAAAAAAAACAACACGATCCTGCCACTGCACCTTCCACCCTCCCACTGTATATCACTTTCAGTCTAACGAACTCTATCGAAATCCATCCTTCTCCAGCTTGGCCGGTTCGTTCGTGTTTTCGGATAGACTTTGCCCCTGCTCAACCACGCCCGGCTCTGTACGCCGCTTCGGACAGTTTTCCGGCTCACGGTCCGCATCGATCGCTTCACGCTTCAAGCGCATAGCCAGCAGATCACGCTTTCCTGCCATCGGCTCATCGGCAGCCACATTTTGCACTACCTTC…
GSR_IOB_NIMR_281	scaffold00077-scaffold03891	KB664547	AGAP013539;	TACTCTTCATCTTTACTTTGCCTCTCAGCATAAACACAAATTGAAAACGAACCAAAAAACGATGGAAAGGCAGGACAGGACTCAAATTGTTTTATCTCTTTAATAGGCAGGACACATTTCCTTCACATTCGCGTACGCGCAAGAGATCAGTAGATAAAAGTACGGCCTAAAGTATCACTACACTAGTGTAGCGTCAGCTTAGTAGGATGTTTAGCAGGGTGGTGTTAATAATTTAACTTAACATTTGTACATGCCCACAGACGTAGTGGCCTCCAAAAAAAAAAAAATAAGATCAACTAAAATAAGATACCTTTCATTGGATTCTTTTTGTTTTGGCTAAATTACATACATATTACTTTACACGTCTCCACACGTCCCATACAGTTAGCTTAAAAAAAA…
GSR_IOB_NIMR_282	scaffold03851-scaffold00028	KB664434	;AGAP011872;	tgatcgacgcgacgacgggaaagctgaatgtagctggaatcgggatcgtcccaaagtgttgtgttgtgcttcacggagcgaagtttcgtggagaggtctaggatgtgccaggtagtgttctcgggcgtgaaagagtgctgtatggtccggctggacggaaccgaccttcgttggccagtcgatcgatcggccttttcgtttccgtcaattccgcaaagacccgggGGCCGCATTAGAAAACAATTGCAGGTAATGAGGCCGTGTTttgggctaaagagatggatgtgtggttaggatgttgtcgtggtaggcatggatctcacagccaactgactcccgatacgtaacggaaccgtctgtgaagatgtggtgatggcgtctggtatttggttcggatca…
GSR_IOB_NIMR_283	scaffold01727-scaffold00023-scaffold00878-scaffold23177-scaffold00030-scaffold00004-scaffold00047-scaffold00007-scaffold00036	KB665243		CTTCGCATACTACCACAACGCTAACTCACTGGTGAAGGACCTTCGGTGCTGCTGACGCATTGTAACTGTGGTTCTGTGTGTGGCCGTAAACGGATCATGTTACCACTGCGTTGAACGATAATCCCACCGCGTCCAAAAGCCGCAACACGAAGCGTTTGCGCCGGAATCAGAGCGATACGGAAGACACCGCCGTACGGCCCGTTGAACCGTTCAAGGGACCGAGACAGTTTCGGGTGGGCGATCTGGTTTGGGGTGCGGTACGTGGATTTCCTGCCTGGCCGGGTAAGGTGGTTCCGTCACCGCCAGCGGCTTCCACCGATGCCAGTCACAACGAAGATGATGAGCTGAAAGCAGACGAGGCGTCCGGAGTATCCGCACCGGACACAACAAACTCGCCGC…
GSR_IOB_NIMR_284	scaffold00035-scaffold05256	KB664755	AGAP004882;AGAP004882;	ATGGTTGGAACCAGCGCTAGCAAAACTTATGACATAAGCCCAACGGAGATCTGTATGGTGGATCTGTCCGAGGAGAAGCACAAAGCGTTTGTATACGCCGTGAAGAACCAGTACTGGTACCAGATGTACATCGACGATCTGCCCATCTGGGGCGTGGTAGGAAAGGAGGAAGACAAGAAGTACTACATCTACACCCACAAAAAGTTTGACATTAGCTACAATGGCAAGCAGATCGTGGACGTCACGCTTACGCCGGAGCGCAAGGAGCTGCTGCGGGTTGGGGCAAAGATCAAGTTCACGTACGAGGTGAACTGGAAGCCGAGCTTGGTCAAGTTTGAGGATCGGTTCGACAAGTATCTTGATCCAAACTTTTTCCAGCACCGCATCCATTGGTTTAGC…
GSR_IOB_NIMR_285	scaffold00127-scaffold04309	KB664442	AGAP004805;	AGTGACGATGGTTACAAACATTTAACTAGCTGCAGCAAATATTACAGTCTTGGAAACCGTTCAGATTTTATGTGCTGTGATGTTTGGCGTGTTATCTGGTGTGGCGCTCGCTCCAACGCAGCTCACAAAACCGAGTTGGTACCGTAAGAAAGAACTCTAAATGTTGTGCATGCGTCGTTAATGTTCGGTGGAATCAACAACAGTGAAGTGCTCTGTGTGTGTACCGTTTGTGTTGAGATGTGATTTAAGGAAGGCAGGAAATGTGCCGTCTCGGTGAAATAAAAAACGGATGTGAAGCGAAATGGCGAGCAAGGGCCACGAAAATGTTTGAAGAATCCGGTGTGTAAGCAAGGCAAATAATAAAATGCACAACATAAAAGCATTATACAGTGTTTGGTG…
GSR_IOB_NIMR_286	scaffold00203-scaffold04024-scaffold19849-scaffold00030-scaffold17064	KB664771		TATATCTGTAGAATTGGTTGGGAAGTTTCGGTGTATTTAGCTGGTTTTTTCGTCCGTTCGCTACCGCGTGTATCATTCGACTGTTCCCTTTTTTACCTTTCCTTTCGCTTGACAGTTGGCTGACAGTGCTGCCAATTGTCGCGCGCGCTATCACCGACACAGGGTGATACAATTCCTACACGGCCTTTCCTGACCCTAAAATTCACCTGAATTTGCCCATAACTTCAACTGATCAAACGCCGTAGTTGTTCTTATTGGTCCCTCATCTTCGCTATCCAATTTCAACACCTCGCAACGGTCATTTGGCATAATCTTTATGATCTTATAAGGCCCAAGAAATTTCCGTTTAATCTTTCTTCCAACTCCAAATTGCGTAACTGGTATTGCCACGATATCTCC…
GSR_IOB_NIMR_287	scaffold00084-scaffold02271-scaffold02493	KB664988	AGAP011766;AGAP011766;AGAP011766;	GATTGTAACACAGCCCCGCAATGGTGGACAACCGTGCCCACCGCGCATCGTCAAGCGCCGCAAATGTACCGGCCCACCGTGCAATTAACGGACACACACACAGCTGTTTGTTCGCCTGTTGAGTTGCAAATAAAGTGCGCACATCTGTGCTTCATTAGAATTCGGCAGCGTTTTCTTTCCCGTTCATTCAGCCGGCTCTTCGATGCAGCTCCGTCAGCATTATGATCACGCAATCGTTTCGTTTTTTTATTGCTTCACCTTCACTGCCGCCATTTAAACGCCAAAACCGCGTCGCGGGTCCACATAATTCATAAATTCTAGTAGCTTTCACTTCACAACTCTACCCACTATATATAAATATACCTCCTAAACAGTTCTGGCTCCTTCCTGGTATGCGCC…
GSR_IOB_NIMR_288	scaffold00551-scaffold00077	KB664547	AGAP013539;AGAP007857;	TTAGTCAGACTTGCCACTCTTGGTGGCACTCATCAGCCCTGGTACCGCTTCCGCCTGACGGTAAAGTGTGTGATGAGGTTCCACGTGAACATCACCGGTGGATGAAGGTGTAAAGGCAATGTGCAACAGTTCCCCTATCAATCCACTCGTATGTGTAAAGCTAGCCTCGGAAGATTCACATATAGCACGCAAAACACAACTCCGACCAGCCAAACCTTTCTGGTCAAACAGTTGTTCTAGCACGCGATAGAACGTCCATCGGGATCGGGATGCGCCGTCGATTTCTTGCTCGGCAGATTCCTCCAAAGCCTGCTCCTGCCACTTAGCTTCAGAGTCGTAACGTTCATACAGCTTGTGAGGCGCTATCACTAGCGGGGTTTCGCGCCTACGAACAACATG…
GSR_IOB_NIMR_289	scaffold01205-scaffold00023	KB665176		AATATCTGCGCGATCGAGCCGTGGTATGCGAGACCTACCGAAGGGGTGCAAAACCCGAACCCACGTTAACAGCTGCGACCGAAGCAGCGTTGTGTCAAAGGCTTCTGCGGTGTGCGCACCACCAACACCACCACCAGCGCTACCGGTTTCGGTTCTCTCTCGTTCGTGCCGTGCGCATTGACGGTGTGAGACGGCTCGCATCGCAGTTGCAGCGTGTTAGTCCGATCGGTCGGTTCGTTATCTCCGGTGCTCTGGTTGCGTCCGTTCTTTTCGGGAAAAAGGGGCAACTGTTAGTGTGTGCTCAGCGGTGAAAAAAGAAAATTGATTCGTAGCCGGTCGGTGTAAGTGTGTGAAACGGTAAAGTTGTGAGTCACAACAAAAAAAGGACAGAAGTGTTAA…
GSR_IOB_NIMR_290	scaffold00067-scaffold04626	KB664462		ATCGGTGCGTGCTAATGTACGAAGCAGGACGGAGGCTACGAGAGCGAAAACACCACGTGCAGATTAAGGACGTTTGCGTCATCCGGAAGCGTGGAAGCAGGGTGAAAATTCCTTCCGGCGGCGAGATCAAGTGATGATCGTTTTGTTTTTCGCCGTTGTGCCGCTAGTAGTAGAACAGCAATCGTAATCAATGTTTCAGACATGCCGCCTCTGGAATCTCAGTATTGCAAGCGTGCTAGCGCTAACGCTGTCCAATGTGTTCCTTACGGTGCGGCTGCTGCACAGCGGCGATTGCAACCAGTACAGCAGCAGCGTGGACGAGGGAGTTTCGATGGTACCGCGAGCCCCAATGCTAACGCCCGCCACCTGCCTGGAGTACGTGCTGGCCGAGAGCCTTGC…
GSR_IOB_NIMR_291	scaffold00004-scaffold14501-scaffold04289	KB664821	AGAP000254;AGAP000254;AGAP000254;	TATGTTTCTGGCTAGTGTGCGAGAGTGAAGAGAGAGAGAGAGCGGGGGATGAGAGAGAGAAAAAGAAAGCGAGAACGAGAGAACAAGACGAGAAAGAGAGAGGTAGAGAGAGAGAGAGGGAAAGAGCGATGAGGAAAGAAAGATTCATACGCATCCTCCGAGTTCTCAACTCTATCTCTCTCTCTCTCACCCATACTCTCTCTCCCTCTTTCATTATCTCTCTCTCTCACACACACACACGATCAACTCTCCCTAATCACTCCATCTCCTTCCCTCCTTCCCAACCCACTGTTTTTTTTGTTTTGTTTTGCGTTGCCTACGAGCTCCCTAACCCTATGAGTGTGTTTCTTCACTGGCCTATCTGCTGCCTGTTCGCCTATAATCATCTGCGCCTACGAG…
GSR_IOB_NIMR_292	scaffold00004-scaffold04053	KB665310	AGAP000013	GGTCCAGAACGTTGATACGAATCATGATTTACGAATAGATAGTCAAGACAGAAGCCTAGAATGTGCGTGAAACCAGTAAGTGGTGGTTATTTCGCGTAGAAACGCAGCATTTAATGGCCTAAAGCTGTCGGTTCACCGGGAACACGAGTGCGGTGCGGCAGAGAACGAAACCAGCCATCCAACCAGCCTAGCCAGCAGTGGTGAGCTGCAGAAGTGGTTTCAGGAGTGTGCAAGGAACGAGACGCGAAAGAAAGTTGACTGCCGTGTGGCCCAGAACAGGGCACGGAGAAGGGGAACCGATCGGGATAACAGATAAAATTATGCCATGCCCTTAAGCTTCAACACTAATTGACCCATTCCTACCCATGAGGAAACCCACTAAACGCCTCGGATGGACCC…
GSR_IOB_NIMR_293	scaffold00026-scaffold22644	KB665065		CTTTTCTTATATGCTCTTGTTAAATGTTGTGTAGCGTTTGCTATAGAGAATACAAAAAAACGTCCAACAAGCGTGATTGTTTCTTTATGTATTGACGGTCGGTGTTTGCTTCGAGCGCAATCTCCTTTCTCCTATTCATCATATCATATCGCACAACCCATAGAGGAGGACATTAGCAGTAGTAAGGACGACGCCAAACCGAGGGGCGCCTGTGGTAGGCTCTTTTAAAACGGACATGCAGGAAAAGGCTAACGACGCTACATTCCCCCATCGCTTCCCAGTCATATATTAGTTCTTTCTACTCCATCTAGACGCTACGGATAAAAAACCTAATTTAAAAAAGAAACCGAGCGAAACTTGGCGTGGACCAAACAAACAGAGTAGATATACAAACAGTGG…
GSR_IOB_NIMR_294	scaffold00013-scaffold16373-scaffold00103-scaffold00038	KB665359	AGAP009451;	acgaggtgagtgagttaaaacgaggtgagtgagtggttagtcggcacgaagagttaaatcaccaatgaattatttaactcatgagtgagttaaaacgcagtgagtgagtggttaatcggcacggagagttaaatcatgatgcaagaataaactcttaaagagtgagtataagatgtaactcactattctaactcattcactctgatttaattcacgctactgagtggttattcccatcactagATTAAATGTGGCTGGAACCAAGGAGCTTTTTGCTCCTATCAAAAGCTAGGTAGAATAGTGAGAGTGTTGAAATGATTTTTGTGTTGAAGATTGAAATGAAA
GSR_IOB_NIMR_295	scaffold00022-scaffold00389-scaffold01283	KB664435	AGAP002379;AGAP002379;AGAP002379;	CTGTCACTGTAAGCCTTTGGTGAGACGAGCTTTCACGGTGGTGAGAAACCTAACTCATCTCACTACTCGAATTAGCGAGTTGTTCCTCACTACTCACAGCTGTTAAGCTTCTCAGTATGAGGCACGTGCGAGCGTACGAGAGAGAAAAATACTCACCTTAAAATTCAAATTTTCATGCTACATTTTATTTTTGCCTAACCTAGCACGGTACAATGTACGCTGATATATTAAGTTTTCGTACATCTGCTAAGCTGTGACTAAACGATTTGTGATCAGATAAAAACAAACAAACAATCTGGAAACGAAACAATTAAAGCGCGGATAATAGAATCACTGCCTGCTAAGAACAGAATCTAAATTACCATCGTGCAATCGGTATTAAAATTAGCTTAAATAAGG…
GSR_IOB_NIMR_296	scaffold00081-scaffold01811	KB665154		aacaaaaaataacaaaaTTATATATATGCAAATCAGTGCAACAAAACATAGACCTGAAGTAGCTGCTCAGCAGATTGGGAAGACGGACGGACAGGATGGGCACATCCACGACGATGTGACTAAAGGAGGAAGGAAAACAAGTTACGGAAAATGCTTGGAAGAAAGAAAAATAAAGAAAAAGTGCTGCAAACGACAGACACTCCCAGAGAAAGGCAAGAAAGAAAACAATAACATGAACAAACAAAAAACATAAGCAAACACTTTGCCAAACAGTCAACTAGGGACTGAAAGTGAGAAGAATTAGAAAATGTAGCTAAAAGAAGTAAAATGAAAGCGCTTAACGGCGAAAAGCATACATATTACACATACAAGACAACACGGAGCAACAAATGATAAAAC…
GSR_IOB_NIMR_297	scaffold00001-scaffold02765	KB664436	AGAP002006;	ATGGTATCGGCAACATATCAGAACCTAACGCTGGCACTGCTGGTGCTGTGTATCGTCACCAGCCCGATAGAGAGTCGATACCGGGAGAAGGATGTTAAGAAGGGAAAATCTTCACCGCCTATACTACCACAGATGATAGTGCCATCGCCGCTGATGAACCTGTGTTCGGGCGACCGGGAGATGAAGCTGGTCTGCCACTGCTCACCAGACGATCCGCACGTGAAAGCACAGAAAGCAAACTGTTGGATCTTTAGCAAGGATTTACCGCGCAAGGACGCTAACTGGCTCGCCTTCCAGACACAGTCCACCCTGGAGCAGCTAAAGATTACGGTGCAGAAGATCGGCAACCTGGCGTACATCCCGTCGGACGTGCTGCACACGCTCAAGTACCTTAAGCAG…
GSR_IOB_NIMR_298	scaffold00187-scaffold00092-scaffold01930-scaffold05144-scaffold16582-scaffold00187-scaffold00092-scaffold05144-scaffold16582-scaffold01930	KB665210	AGAP006366;AGAP006366;AGAP006366;AGAP006366;AGAP006366;AGAP006366;AGAP006366;AGAP006366;AGAP006366;AGAP006366;	TAGGTATAGTAGTACATTGTGTTTGCCCCTATCTATCTGGTTGGTTGTGTATGTCTCTCTGTCTGTTGTCTCGCCGTGGCCGCTAAATCATCGCGCACTCGGTCGCCCCCCAGTCGCTCGCGAGCTGTCGTTGCGCGAACATTCGAAAAGTCCGCGACAGAGCCAGATCCGTTCTTCGTTCGGTGCTGAGCTTGGCCGAGAAAGAATCTGATCCAAATCGTCGTCCACCGACGCACCGTTTGTTCGGTACGGGTCACACGGAATCTTCCGTCGTTTAAACATTTGGACTAGTGCCTCTCTACAATCTCTCCCCCCAAGAGGTTAGGACAAAACAACGGTCAAAATGCATCGCGCAAGAACAGCACTCCACATGGTGAACCCGATGGGTCAGCAGAACTT…
GSR_IOB_NIMR_299	scaffold00412-scaffold03801	KB665043	AGAP012010;AGAP012010;	TCGATTGAGCGATTAAGTATTTGATGCTACAAATTCTACCCGAGACCGCCGGCAGATGATACGCGAAATAGTGGTGAAAAAGATGGGCTATAAGCTCTTCTTCGTCGAATCAATCTGTGACGATCCCAGCATTATCGAGCAAAACATCATGGAAGTAAAAGTAAGTAGCCCCGACTATCGGAACATGAACATGGACGAGGCGTTGTCCGATTTCCGGCTGCGCATCGAACACTACCAGGAACGGTACGAACCACTGAGCGAGGAGCTAGAGAAGGATCTGTCGTACATGAAGATCTACAACACGGGCGAAAAGGTGGTCGTGCACAAGCACGAGGGTCACATACAGTCGCGCATCGTGTACTACCTGATGAATATTCACATTACCCCGAGAACGATCTA…
GSR_IOB_NIMR_300	scaffold00824-scaffold13812-scaffold00583-scaffold00124	KB664799	AGAP006441;AGAP006441;AGAP006441;AGAP006441;	TCTTCTCCCTTTCCAGCATGGTGCTTTTGCATGTCGAATTGATTTTGACACGAAAAATGTACCTTCCACCATGATCTGGAGCTCGACCACAAACCGTCGACCCGGGAGGACCTGCTGCCGCTGATGTCCAAGTCCTACCGGATGCTGCTGTCGAGCCTGGGCGAAGATCCGGAACGTCAGGGACTGCTGAAAACTCCGGAACGGGCCGCCAAGGCAATGCTCTTCTTCACCAAGGGTTACGACCAGAGTTTGGAAGAGGCCTTGAACGGTGCCGTTTTCGACGAGGATCACGACGAAATGGTTGTGGTGAAGGACATCGAAATGTTCTCCATGTGCGAACACCATCTGGTACCGTTCTACGGTAAAGTTTCGATCGGTTACTTGCCCTGCAAGAAGATT…
GSR_IOB_NIMR_301	scaffold00063-scaffold00759	KB665387	AGAP004018;AGAP006441;	CATTAGGGGAATATCATCGACTTTATACATTCACAATCACATTTTATAATCGATCAATTACATTGGATCACCTACGACTAATGTACAATACAGTTTACATATTGTATCACCATAAACAAACAAACCGTATGAACCATGCAGCATGCAGGGATTGACTCGATCGGGTCACTCTCTTCTGTCTCTTTTCGTATTCCTTTTTTCCAACTTCAATCGTATTTGGTCATTACATTACATCCATACTTTAACCATTAATAAAGTTAGCGAAATGTGTGTGTGTGCGTGTGCATTTACGTCATCGGCACGTGACGCTGCTGTCGGTTCGCGGAACCCTCCTTGATGCCCGCCGGTCCAGCACTAGCACCAGGACCGGCAATCGCTTCCGTCACGGATCGAAGCTGC…
GSR_IOB_NIMR_302	scaffold01384-scaffold05206-scaffold00136	KB664510	AGAP006243;AGAP006243;AGAP006243;	CCAAGAATTACCGTATCTAAATTGCCTTTATTTCTGCCTTCATGCATTCATTATACAGCAGAGCTCGCGCAGCCAGCAGGAGAGCTCGCCTCGTCATCGCCTACTTAGTGAGAAATGTGGAAAGCGTATTTTATATATCTGTATCCGGTTTTTGTTTGGTGCAAAACCCAACCCGCTCGTTGTCTTCCCCAAATACTATCTCCAAAACTAAACACCAGATGAAGAATTTTTGGGGGCCATTTTGCGAACACTCACATACACCCCCATTGGGTCCTTATCCCAAAATTCTTTCTATTTTCTTCTGCGCATCTTTAGTACATCACCAGCATAGGGTGGAAGGTTCCACAACTAATATCATAATACGAACAAGAGAGGGGAGCGATAGCGTACATTTCTCAA…
GSR_IOB_NIMR_303	scaffold00738-scaffold01897	KB664508	AGAP003525;AGAP003525;	GTATGCGTGTTGAGAAGTGCGCCCTCTCACATATGAAGCGTTTGTGCGCGACCCTATGCGCGCGGTATCTCGTGTATGCTCACTCAACATTCACGCTAATCTGGTTTGTGGCCATTTGTGGTTGGTGCTTCTTGTGCACACGTTTTGTTTGTTCGCCGCTCGGGACGAAGCACTACTCTGCTAGTGTGTGCGTGAACGAACGCGTGTGTGTGTGTGTATAGTGTGATCTGCACCTGTCAAAAGGCGTTCGGCAGTGAAGAGGCGCAGTTTAGACGAAACCTTCTCGCAGAGCTGTTTTGTTTGTCCCCCCGGCGCGGCTGTATTCGCGTGTTGTGCTGTGTGCATTTGTGTATGTGCGTGCGTTAGAGGTGCTAGACAACGCATATCGTGTCGCCCCAA…
GSR_IOB_NIMR_304	scaffold03434-scaffold00010-scaffold01982	KB664441	AGAP006653;AGAP006653;	ACTCAAAACTCTCATTACGTGTGAAAGTGAAAGCCAAAACGCAGCGGATCGAACTGGTTCACCAAACCACACTCCCGGCGGAAGAGTGGGAAAAAAGTGAAGGTAACCTTCTCGGACCAGCTCGATACGGCCAGTACCACCGGTAGTAACAGCAGCGTACCGAGCACACCGAGCCCCTCCGTATCGTCCGCCCAGCACCGGTGGCGCTATCTGGAGCAAATCTTCGCACCGTCTACAAGCGCAGCAGCAGCAGCAGCACCCCCGGCCGGGAATCGATCTACGGGGTCCTCCGAGTTTGATCGCGGCAGTAGCTTCCGGCAGAGCAATACGAGCTACGGATCGGTTGGCAGCAGTGGGCCGTACAATAGACGTGCACCGCCTCAGCGCAAAGTAGGACAG…
GSR_IOB_NIMR_305	scaffold00080-scaffold01370-scaffold11193	KB664954		AGCAGCAGCAGCAGCGGCACTAACCAAAACAGCACTTCCCGAAGCAGCAACGCACAGATGATCGTTGGCGGTGGTGGTGTTGGTGGGGGCAACAACGTGCACAACATCACCCCCGTCGGTGTATCCAGCAACAGCAGCAACCAGCTTACGTTTTCGTCCGTATACCTTAATGCAACCTCGAACAGCAATGCTCAACGGCTGAATTTGCTGTTCGCGCTGGACGAAGGGGCCACCGGGCCGTCGCAGCACAAGCAGCAGCAGCATGGCGGTGGTGGTGGTGGAGGCGGGGCACATCATTCCCTGTACCGTACCGCTTCCCAGCCGGCGACCCGCCACAAGATGGAGGATATCCTGGATATGCTTTCGCTGAACGCTGGCATGAAGCTGCTGCCGGAGCTG…
GSR_IOB_NIMR_306	scaffold03434-scaffold00010-scaffold01982	KB664441	AGAP006653;	AGTGGTGGCGGCAGCAACTTTCACTCTCGCCCAGCTCAAGTGGGGTTGCCGTTGTTCAAGTGGAAATTGTCATTGTGCTCTAATAAACGCATATCGGTGTGATTGAGTGACAAAATCCGTGCATCCATGGGTTCAAAGTGTTGCAACATCTTTCCGCTGTGTACCAGATCCAATGATGAACGGGACGTGGAATGGTGCAGCGGATCGAACTGGTTCACCAAACCACACTCCCGGCGGAAGAGTGGGAAAAAAGTGAAGGTAACCTTCTCGGACCAGCTCGATACGGCCAGTACCACCGGTAGTAACAGCAGCGTACCGAGCACACCGAGCCCCTCCGTATCGTCCGCCCAGCACCGGTGGCGCTATCTGGAGCAAATCTTCGCACCGTCTACAAGCGCA…
GSR_IOB_NIMR_307	scaffold00001-scaffold00003-scaffold00002-scaffold16632	KB665176		GTGGACCGATGAATGCTGCTTGCTGACGACTGCTCTTCGTGAAATGTTGATCCCGGTGATGAAACACACGGTTCCGGTGTCATGCTTGGTGACGGCTGAAGGGATGCTTGATGCACGACAGTCGTTTTTGCCGGTCGTGCAACGTCATGCGCGCATGAACCAGCAGCTGAAGCAACAGACGATTTCGGCGTCGCACTTGTAGTCGGCTGCGATCCTCGCATTGGTTCGTCAAACGATCCTAACGATCACGGAATGCCATCCACGGATCCAGCGGCGTCGCACTTGTGGTCAGCTGCGATCCATGCGAACGCTTTAACGACATTGTCGCTAGTGGAACAACACGCACGGAACTAGCAGGCACAAGAATCATCCCACGTATCGCTTTCGTTGAGGGCTGCG…
GSR_IOB_NIMR_308	scaffold00687-scaffold00001-scaffold02230-scaffold01981	KB664484	AGAP002334;AGAP002334;AGAP002334;AGAP002334;	gagtcttttaccgataacgcagaacagtgtgtacgacatacatttgcagcagaacgggaatccggaaccaaaacgagtccgggaatcaaaacgattccggaactggtcggaatcgttctttcggatcggatcggactcatctatatgctggatcggatcggaatcgtgattccgaaccggaccgcccatccctaGTTGTTTGCCAAAAAGCAAGTGTTAAAACGATTTTACCTCCCCTGCTGGTTGGTTACGCTACTGCTCGGCAACATGTGCACCTTCAAGAATGATTTCCTAGGTTTTGGAGCGGGGCTTATGCTACTCAGAATAAAGGGTTTTTGCACTACTACTATAAACTGTTTTATTCCCCCCTATAAACTGCACCAATAATTGCTGCGTTGA…
GSR_IOB_NIMR_309	scaffold00500-scaffold00038	KB664677	AGAP000082	TTACCGCTGTTTGCGGACAACTTTGACTTCCTGTCGCGGGATGATTTTGTGCGCGGTGTGCTGATTAACGAGGAGATTCTGAACAGCCGGATCTACGTGGCAAAGCTGGCGAGGGAAGAGTATGCGATGCGGGTGAATAACTGGCAGAGCTACCATCTGGTTAGTTTGGATGTGATTAACCGGTGGCTGTACCCGATGGTGCCGGATACGGCGATCAGCGAGTTCCGGCAGCAGTACAAACACTTCCGCAACAATATCTATCGCCATGGGAACGTACGGTTGAGCCGGTCGTGCGAGCTGGACGGTGATCTGGTGGTCGGGGAGGAGAGTGAAATCCGCGAAGGTACGTATCTGCGTCAGTCCGTGGTGGGTCGCGGTTGCCAGATCGGACGGAACTGT…
GSR_IOB_NIMR_310	scaffold00022-scaffold00392	KB664541	AGAP003546;AGAP003546;	gccatggttacagtacacaccgaaacacctgccaagtagatagcgacctagccaccattctctcacccggcaaacgtcaacaaaaccacctacttcgatttttatacatcagcaagctttatagagaaatgtagttttaatccgcaatagttttttatgagccacacttgtaatagtCCTTAGTTACAATCTAGCCATAACCACAATAGCCATGTAACCTTCATACNNNNNNNNNNNNNNCCGCGAACAGTGTCTACTATAAAATGCTACGCACTTCAAGGGCGTACAGCGCTCACTTTTGCTTGTTTGTACACTAAAGATTGTGTCACTGTCACAGAATGGCAGCAGAAATACATTTGACAGCTATATGGGGATTTAAATCACTCCTACGTATATGTA…
GSR_IOB_NIMR_311	scaffold00028-scaffold01220	KB664499	AGAP011909;	TTATTGATAACAGTAGTTCCATTCGGGTGTGTTGTTCATTATCCACTGCATATAGTACAGAACGTTCGTGCTGACACTGGGCCGATCGGTAGCACACGCGATCCCGTACCCGATCGTACCGATCAGATAGGCTCGCATGTTGTACCCATCGGTGTAGAACAGCGGACCGCCCGAGTCACTCTGGCAGGTGTCTTTGTTCGGGGTAAGTGTGCACAGTTGCTGGGTGGACGAATAGTTGGCGTAGAGCGAAGAACACTGGGTCGGTTGTACCACGGCAAGCGAGACCTTCATCGGAACGTTCGATTTCGGTGCACCGTAATCGAGCGTGCCCCACCCGACCGCCTCCAGCTGAATGCCAACGAAGGATGCCCCGGTGAATTTGATCGGTAAACAGGCAGG…
GSR_IOB_NIMR_312	scaffold02392-scaffold00006-scaffold00493	KB664288	AGAP007780;AGAP007780;AGAP007780;	TGGCAATTTTAACGGTTTTTACGCGTTGCTTTTATATTTACACTCCAATTCAAACAAATTGTAAGAGCGACGACAAGACTTCCACTACTACACGACGACCGTGTTCCAACGGAGGAACATGATTACAGAACGATCGTAACACAATTGTTGGTAGTTCTTTTTTTTTCTCCTGCGCATCATACATCCCTCTAATGTTCACTGGCAGCTTCGTCCTCTCCGGCGACCTGCTTCATACCGGTACCGACCGGTCCGTGGCGTCTTTCCCAGATCATACGGTGCTTCTGCTTCATGTAGGCCGTCTTCGCGTTCGCATAACCGCCGAGATCACCATACTTGATGAACCAGTTCTCGGCCGCCTTTTCGTACGTGTCCAGCAGCGAACGGCACTTGCGCTCGTGG…
GSR_IOB_NIMR_313	scaffold01743-scaffold00010	KB664525	AGAP005773	ATGGGGTGCGCACAGTCGGCTGAGGAACGGGCTGCCGCCGCTAGGAGCCGCCTGATCGAGCGTAATCTCAAGGAGGACGGTATCCAGGCGGCCAAGGACATCAAACTGTTACTGCTCGGTAAGGAGAAAGTGCTGGCAATTATTCACGAAAGTGGCTTTACGTCAGAGGATTTCAAACAGTATAGGCCAGTAGTGTACAGCAACACGATACAATCACTAGTTGCAATACTGCGAGCGATGCCAAACCTTAGCATTGCGTTCGGCAATAACGAGCGAGAGTGTGACGCAAAGATGGTGTTCGACGTAGTACAGCGGATGCACGACACAGAACCATTCTCGGAGGATCTGCTATTAGCGATGAAAAGACTGTGGTCGGATTCTGGCGTACAGGAGTGCTTC…
GSR_IOB_NIMR_314	scaffold07401-scaffold00105	KB664453	AGAP010258;AGAP010258;	GTTTGGCTGGCCGTCATCAATACTGGCAACATCAGTGAACAGTTTTGTTTGTCCTGCTTGTCTTGCCTGTTTCGGAACCAATCTTTTCGCGTTCGGAGTGTATGAATTATTCGTCATATACATGAAAACGTAGCATTTCTTTCCAATTTGAAATGACTATAGCTATGAGAGTGGTGGCAGCAATTTGAAAGAAAGCAGCATAAAAGGCTCATTAGACAAAATCCCACGCCAAGCGAGTGATTGTATGTGTGGCGCGTGCAAATTTACACAGATTAACTAATTCAACTGCAGCCAGAAGCTTGAACAATGACACAAATGGCTCAAGAGGAAATTGTCTCGAACACCAAAACGGTCATGCAGGGCTTGGAAGCTCTTCGTGTAGAACATGTAACTCTGATG…
GSR_IOB_NIMR_315	scaffold00278-scaffold00046	KB664488	AGAP004619;AGAP004619;	TTTTTTGCTTGATTCTCTTTATTATTTTTAATAATTACTTACTTCTCCTTACTACGAAATAAGGGTTTGCTTTTTGTTTTGCTTTTCTCTGCACAGTTTTACTTTACTAGCGTGTGGTTGTGTGTCCGTCTGTGTGTGCGTGTGTGTGTGTTTGAGTTTTTTTACATCAATTAATAATAATCCTCATTTGCGTTATACGTTTTACTATCTTAATCTATACCATCCTGCCCCAACGGACGTTAGGAGGGGAGTTTTATATGTTACGAAGCACATGTAATTAGATTAACTGCACACGACACACCACACACTGCACACACACACACGCACAATAAACAATAGGGTTTGAAAAAGTTGGCTCCAATCGGTTTCACCTAGTCTGCTGCTGCTACTGATTGATTG…
GSR_IOB_NIMR_316	scaffold00022-scaffold00389-scaffold01283	KB664435	AGAP002379;AGAP002379;AGAP004731;	CTGTCACTGTAAGCCTTTGGTGAGACGAGCTTTCACGGTGGTGAGAAACCTAACTCATCTCACTACTCGAATTAGCGAGTTGTTCCTCACTACTCACAGCTGTTAAGCTTCTCAGTATGAGGCACGTGCGAGCGTACGAGAGAGAAAAATACTCACCTTAAAATTCAAATTTTCATGCTACATTTTATTTTTGCCTAACCTAGCACGGTACAATGTACGCTGATATATTAAGTTTTCGTACATCTGCTAAGCTGTGACTAAACGATTTGTGATCAGATAAAAACAAACAAACAATCTGGAAACGAAACAATTAAAGCGCGGATAATAGAATCACTGCCTGCTAAGAACAGAATCTAAATTACCATCGTGCAATCGGTATTAAAATTAGCTTAAATAAGG…
GSR_IOB_NIMR_317	scaffold00392-scaffold00022-scaffold00089	KB664541	AGAP003546;AGAP003546;AGAP011167;	gccatggttacagtacacaccgaaacacctgccaagtagatagcgacctagccaccattctctcacccggcaaacgtcaacaaaaccacctacttcgatttttatacatcagcaagctttatagagaaatgtagttttaatccgcaatagttttttatgagccacacttgtaatagtCCTTAGTTACAATCTAGCCATAACCACAATAGCCATGTAACCTTCATACNNNNNNNNNNNNNNCCGCGAACAGTGTCTACTATAAAATGCTACGCACTTCAAGGGCGTACAGCGCTCACTTTTGCTTGTTTGTACACTAAAGATTGTGTCACTGTCACAGAATGGCAGCAGAAATACATTTGACAGCTATATGGGGATTTAAATCACTCCTACGTATATGTA…
GSR_IOB_NIMR_318	scaffold00094-scaffold00971-scaffold10587	KB665254	AGAP008755;AGAP008755;AGAP008755;	gggaaaggaggggggcgggTGGTTGGGTTTGGGTTTTCCGGGTGTGGGAGAAAGGGAAGAAGAGTTGAATAAAATAAATACAAATTGTTCATATCCATATATCATATGCGCGTGCTTGCGACACTCTAAATTTGTTTCTTCGTACTACCCCACGTGTTCTTCCGAGCTCGATACGGACTTTGCCTGCCTCATCAGCGCACAACTCACACACACCCGCCGCGTCCTCTTGTACATTTTATATCTGATTGCGCGTATCTTTAATTGTCGACTGATACATTATGTTGTGTTTATTAGTAATTTGCTTCTTTGCTAGTTTGCTCCGAATTTTTCTTTTTGAATTGCAAACGGACGAGAGTTGATCGTGTGTAAATGGTGCAGCATTATTACAACATATTTCCA…
GSR_IOB_NIMR_319	scaffold02770-scaffold00027-scaffold05207	KB664447	AGAP001382;	CCTGTTAAACGCACTACCACTAAGGCACAATCCAAACGGCGCACGACAAAACTCATACTGTCCTTCTTGCGTCACAAAGGATGTATACTTACGACTTTCTTCAGCAATCGGCACGTGAAAGTACGAATTTTTTAAGTCCAATGTCGAATAAACACGAGCACTTTCCAACTGGTCAATTTGATCTTCTACTACCGGCATAGGAAACGAGTCACGAATGATTTTCTTGTTTATTTCTCGATAGTCCACGCACACTCTCCGCGTTCCATCTTTTTTCGGCACAACGACGATCGCACTAGCATAAGGACTATTTGATGAACGCACAACACCATCACACAACCACTCTTCCACTTGCGCTTTTACCGCCGTTCGTTCCAATGGTGCAAGACGCCTTGGGTACGC…
GSR_IOB_NIMR_320	scaffold00148-scaffold00512	KB664593	;AGAP010258;	ATGTCAGCCACAGTGCATGAAGATTGTTCCTACAAATATCGGCTTCAGGTTACGGGACCGATCGAACCCAACTTTGGGAACGATTTCCAAAAATGCCACTCCGTCTTTCGTTTCTGCTATCCCTCCAGCTCCCTCAGCATCTCGTCCAGCACCGCCATCGATGGTCACGATTTATACGATCGACCTTTCAACATGGACACCTTCGGAGGTCCGCGAAATTATCAGTTACTTGTCCTGCTGGCTCAACGCATTAGCTCTTTGATCATCTATATGATAAACCACGTGCGGCAGGAACATTTACCAGTGCAGGAAACTTTTCGACAAGCGCTTTTGCCTATGCATCGGGTGCTGACGGAGTTCCTGTTCCCACAGGCACACACGTTTGAGCATAGCTTCCAG…
GSR_IOB_NIMR_321	scaffold02210-scaffold00055	KB664476	AGAP001382;AGAP001382;	GCTTTACATCATCATTGATACATTTCTATCAAAACTGGCATTAATTTATTTAAACACTACGTTCAACAATAGACAGAAGACAAAAAGCGGTCGTATTGCTCGAATTGATTGTGTTGTGAGGCTCATTTTTCTTTCGTCAGTTTTTTTTGTCCGTTACACTCCCGTATCGTATTGCACTTCTTCATTCATGATAACATGACAGAAATAGGTTGGCTCGCATCAGTGTGTTCGAAATTTACAGCATGATTCCCTCGAACCTTCGTTTCCTCCCGGGGCCACCGGCAAAGTTGGCGACCGCCATCGCCATTCGGTGTTTCGCTTCCTGTGCGCCTGAGTATCCACGCGATAGTCCAAAGTCTACCGTTCGTTTGGAGTTTTCTAGCTCATCTTTGGCACGTA…
GSR_IOB_NIMR_322	scaffold01892-scaffold00110-scaffold03671	KB664433	AGAP006721;AGAP006721;	TCAAATTAAGCCTCCCCTTTGTCCGCTTCTTTTAATTTGCCTAAATTCCGTTTTCCCTTCAATTAGCACATCGCTCACTTCGCTTTTGAGTCTAATTTCCGTCCGCAATCAGTTAAACAATTACATCACTAATTGGCGCCTATCGAAACGGGCGAATGTTAGCGATGCGTCCAAATTCGTATTCTTCACGAAGCTTTCGGGTGCCAACAACTTCATACATTCATCAAGTGTATCCTTTACCCATCTTCTTCACGTTTCCCTACAGCAAGCAGTGGAAAGATTAGCATAAACAAAAACTACGGCTCCCTACGGTTCCCGGGATCCCATCATCCACCGAACCAAAGTGATCGCGTTTGCTGTATATATCACCGCGCCTTTCTGCCGTTTGGGGCGGAAAAA…
GSR_IOB_NIMR_323	scaffold00017-scaffold06964-scaffold17799	KB664555	AGAP009566;AGAP009566	AGACATAATACTGCCCCCTGGTAAGCCCCCGTCGCAGACGAACAGTGTTTAACAGTGAAGCGGGTTGCGAAGAGCTTCAGCAGCAGCGCAGCAGCAGCTCCGGCTCCGGCAGCACCAGCAGCAGCATCACCAGCAAGTAAGCAGGCAGCAGCAAGCGGTGCAATTGAAATAATTTTGCAGAACCTGTAGCCGCGCGACCAAGTGTGCAAGTGCAATTTTATATTTCCCAAAAATCCCAACCACGCGCGTGAGTTCCTCTCACTACTACCACACAACACAACAAAAAATAGTAATGCCCAGTGAAAGAGTGCGTGTGTGAGATTGCAAAGTAAAAAAATGCGTGTGTAGTGAATTAAAAGCGAATTTTTATTCGAGTGCATAGTATTTCCATTTTCCACC…
GSR_IOB_NIMR_324	scaffold07347-scaffold11972-scaffold00090	KB664544	AGAP010817;	GCGCGATCGACAGGGACAAAATGGGCCACCAGCAAGCAGGGCCACAGCAGCACCACTATCGGAAATCGGTAGCTGTTGCATATTTTGGGGGCCAAACCAGTATCGTACAAAAAGAAAACAAGTGTTCGGTGGATGTGGAGATGAATGGTGATGAAACCACCCAACAACTGGGAATAAACAGAACATCGCGCAGAGACCTATGGCTGCCGCGCCACGGTCGTCCTCCACACGGTGCCAATCGAAGAAGCAGAAGCAGAATGGGTGGTGGAGAGACACGTTCACATCCCACAATGGTTTTATCAACACAGTTTTGTGAAGGCTGTTCGCAACTTGGAGATTGCGCAGGAATTCTTTTAGCTGGCTGTATGCGTTTCTCTGCCATTGTTGGCATCCTTTTGA…
GSR_IOB_NIMR_325	scaffold00363-scaffold00025-scaffold11699	KB665343		TTAAATAATTGGTAAAAAATTAATTGAATTTGATGAGATTCATGGTTAGTATATCTCGTTGCGAAGGCTTACAATAAATAGGAAAATAAATAAATGAATCCACAAGTTGTTTCCATGCGTTCTTTATTCGTCCATTATTCGTCGGCCTACGCATAATAATTACAATTTTCCAGGTAAAGAAAGCAGCTAATTACTAACTTAAACATTAAGTACTTAAAGCGCTACAGAGTGAACTAATGTCTTATCCCTTATAATACTCCTTTTAATAGTTTCTCATGTGTAAGTATGTGTATGTTTTTTAAGCTAGTTTTTATAAGTTTTGTTTTCCAAATAAGCTAATCACAGAAGAATTTGTAAGTGGTTCGACACCAAATGCGTCTACTTAAAGCACATCGGATG…
GSR_IOB_NIMR_326	scaffold15229-scaffold00029	KB664412	AGAP008449	TTACAGGGTTCCGGGAGCCGGGGCCAGGTTCAGCTGCTTCTGCGACACGGCATGGCCGGGCAGAGGAGCAACATGGACGGCACCACGGGTAGCGGTGACCGAGGTAGCTCCGGGCACAACGCCGGCATGGTGAGCGACCGAGGCGACTGGGCCATGGGGAGCGGCCAGGAGAGCGGCGTGCGGGGCAGCATAGGCAGCGATGGCAGCGGGGTAGGCAGCGGCATGAGCGTACGGGTAGGCAGCGGCAGCGTACGGGTATCCGGCGTACGGCCAGGCTGGAGCGTTGGCCTGGATGACGGTGGCTCCGTATCCGGCGTATGGGTAGCCAGCGTACGGGTATCCAGCCTCGGCGACGACGGCCAGGGCGACGATGGCAAGGGCGGCAACGATGCACTTCAT
GSR_IOB_NIMR_327	scaffold00098-scaffold02758	KB664777	AGAP008167;AGAP008167;	tggtggtgTGGTAGCTTTGGCAGAAAAATCGCGAATACGGAGGACCGTCCCGTCAGACACGACGGATTAGCAATTAAGCCCATCGGCCGTCAGCACCTTCCAACGCCGGTGTAACTATGCTGATCAAACGACGAAGAAGGgcaacagcagcagcagcagcagcaTAGAACGGCAATTGGGTCCGCGGTGGTCGCGTGTTGTGAGGTGTCGCGCCGAGCGTCGTGTGTGTTGTATATAGCAAAATTGAAGGCACACAAAACAGTCCACCACGTCTCCCAAATGCGATAAGGCGATTTCGACGACCAGAAGACGGTATATTCGCACGCGCTCGCCCCGTAATCAGTATTGTGCTCCTTCAGTTAGTAAAGTAAGTAAAGGAAGAAAAGGGCCTTTTTTCGT…
GSR_IOB_NIMR_328	scaffold09713-scaffold02972-scaffold00129	KB665010		ATATATGAGGATGTCAAAAAGAACATTTGACTACATTTTGGGAAAGATAGAACATCTCATCACAAAACAGCCCACACACGTTCCATACATTAGTCCAGAGGAGAGATTAATGGTGACTCTCAGATTTTTATCAACTGGAATCCCCTTCAAGTCATTATCGTTCAGCTTTTGTATGGCTCATAATACAATTGGAAACATTATTTATGAGACATGTGATGCGATTTGGAACACACTCAACTCAGAATTTATTCCGCTTCCGACGACGTCTGCATTTGAGAGAGTGGAAAAAGAATTTTTGGACCAGTGGAATTTTCCTAACTGTCTTGGGGCCATTGATGGAAAACATGTGCGGATTAAGGCTCCCGCCAAATCTGGAACACAATATTTTAATTACAAGAA…
GSR_IOB_NIMR_329	scaffold00099-scaffold01800-scaffold00604	KB664430	AGAP009464;AGAP009464;AGAP009464;	TCGGACGGACGGCTTTCGCAAAAATCCATTGACTCTCGACACTCGGAGGTCCTTTGTTAGGTGCAAATCAATCATGTACTTCAGGTTCGCAGTGAGGCATTAGCTGCAGTTTGCAGTCAAGAAGTTGCAGCCAGGCCGCTTAGTTTTGCTTCATGCTGCTTTGCTTTATTGTGGACAACATCATCGCTGGACAAACGTCATTCTTTCCGCCATGTAAAAACTTCCATAGCTTAGTTCGAAGCTTAATACATTCATCGTAACTTCGGTCCTACCTTCTACATACTATCTAACTTTGAAGATTCTTGGCCAATGGTTATTCGTGTACGGGTAAAATAATGTCTATCAAAATTCGTCGCTTCACATTCTTCGTACAGGCTACATACATATAGTATACAAAAC…
GSR_IOB_NIMR_330	scaffold19100-scaffold00112-scaffold11232	KB664877	AGAP005138;AGAP005138;AGAP005138;	CTGTTGGGCGGTGCAGCGAAATGGTGCGCCGACATCGACGATTGCTGCAATCCTGGATGTTGGAGATGCATTTGGTTCGGTTGCTGTGGACCGGACCCCGGTGCAGGGCGATGATGATTTCCACCGGGCGGTGTACCGGGATGGCCGGTCGGAGTCGTAGGACAGGAGGCGATTGGATTATCCTGATTGCAAAAGTATGAATTCTGCATCGAGTAAAGCCGATCGATGGGGTTAACCATCGGTCCGATGGAGTCATGCGCCACCGATGGACCTCCGTTGCCACCGTTCGCCAGTGGACCACCGTTCATGGACGAAGCCAACTGTTGCAGCGAGACACCATAGTCGAGGGTGGCACCGTTCGAGGGTAGCATCGATGTCGTGTCGAGTGTCATGTTTTCG…
GSR_IOB_NIMR_331	scaffold00073-scaffold01145	KB664488	AGAP004335;AGAP004335;	CAGCGCATCATCTGCTCTCATTCTGGCCAGGTTGATTGGTGTTTATTTTTATCCAACCGTGTGATTAATTGTGCAAAGAGTGCAGATCCTGCAGAGACTTTCATGTAAACAAAACAAATAACACGACTATTTTCGGGTCCTGCATCATCACCATCGAACACAATCCCGCACACACAAACACGTGCTCTGGCGGACCGGACGACCTTGCCGGGGCGTGAATCATTCAAACAACAGTGTAATTAGTGTAATGTTAAGCGTGTAGAGAGATCGGCATCGGCGGCTCTAGTGATAGAACGGTACACAGCAGCAAGAGCAAGAAAGTAAACCAACCACTGACCTACCACCACCACCATCAGCAACACCACTAGGTCCACTCTAGGTCCCAACAAAGTAGATTGC…
GSR_IOB_NIMR_332	scaffold00116-scaffold00081	KB664440		ATCGTAAACCCAAAATGGTAGAAGTAAGGTAAAATTCGTATGGTTTTACCTACCACGATGGTGGCATTGGTAAATAAGTGAAATTGTTTTTGGCTACCGTAACATTAAGTAGGCGAAGAAGTAACGAGAAGCTTACTTTGTTAAACGCAACTTAAAGGCTACCGTTTAAAAAATAAAGGTTAAATGAAAGAATCTAATCATGATTGCACTGGACGTCCTAATGTACTTAAAGTTTGGGAACATGATAGCAGGAGAGATAAATTATTGCTATCTAATATAAATCCAATAAGTGGCACTCTACTGCGACTCGCACCTGTGCGTGTGATGGGCTAGGAAGTATATTAAGTAAAGGAGCTTCCTATAGCTTCGTATGATGATTATTTGTTTTCGAAAGAAAAA…
GSR_IOB_NIMR_333	scaffold00145-scaffold00240-scaffold00417	KB664345		TTCGGTCGTGCCGTTGAGCGGTCCTCAGCTGACGTCAAACTAAGCCTTACTTAGATAAGCAACAGAAGCCGAAGCAGTGGTTCAGTAAATAACAATCAGCTCATTAGAACAGTGTGAGAGAGTGTGTAATTTATGATTAAAAAAATAAACCGCAGAAAAGTAATTACATCAATTTTGACATCGCGTACTTTCGACGTAGTGCCCTCTTGTTGCGTCGTAATTAGTCGGCAGCCGCGAATCGTGAACGCGTGCTGAGTGATCGAACGAAGCGAGCGCCCAATTCACCAAACATAAGCAACGCAGTATATAGTGGTGAGTGACTTCAGCTTCCCCGTGGGCACTCCGCCTTTTATGTACACATGCGCTCGCGTTGTACACACGCATACGGTGACACATCGA…
GSR_IOB_NIMR_334	scaffold00865-scaffold02866	KB664852		TCTTCGGCTTGGCAGCCCTTACCTATATGCTACAATTGACTTAACTTTAACTTAACGAACGTCCTCCAGAACATGTCGGCACATGCGGAACGGATTATGTTTAGCCGCTTGCCCTTGACCACTGCCCTAGTTCAAACGATTTTGCTTACGGTTGATGTATTTGCGCCCATCTTACTGATCGTAAACTTCCGTGGCACCGTTTTCACATCTTATGTTTGGTCAGACGCTCGTAACCCTCAGAGCTACAAACTGTTTTGACTTAAAGTTTTCATGTAAATCATCTACTGTGTAACGTATAGCAGTCTTCTTTCTTTACCGCCTTGCTAGGTAGGGGTCACAGAAACCTTTTGTATTGAGCTGTGACTCTATCTAACAGCTTAACCTATGACCTATCTAAGC…
GSR_IOB_NIMR_335	scaffold02716-scaffold00080	KB664954	AGAP010961;AGAP001566;	TTTTTCATCAACCTGGTTTATTCCCACACTATTTCAAAACATCCTGGACAAGGTCGGCGTAAAGTCCTTCGTTGGAGTTCAGCGTGAAAGCGTTCTTGCGGTAGGTTAACCGTTCCGGCGTGGACGGCGATCGATCGATACGATAGTGGGAGAGCAGCTTCATGAGGGCTATCTTGATTTGCAACGTTCCGAAATGGGATCCGAGGCAGGTGCGTGGTCCAACGCCGAACGGCATGTACGTGCAGGGTTGTATTTGGTCCAGGTTCTCTTTCGCGAATCGTTCCGGATTGAACCGTTCCGGGTCGGGGAAATACTTCGGATCTCGATGGATTGCGTAGATGGGAATCAACACTGGCATGTGATTGGGGATAACGTAGTCGTGGAACGGTTCCAGCTTAT…
GSR_IOB_NIMR_336	scaffold00900-scaffold00163	KB664748		AATTCATATAACTACTTGAATCGTCAATTGGCCCAACAAACCCTCAACGAGCTGACTGTGCTGAAGACAACGCACCTTGATAATTGATCATTTATTCAAATGATTGGAAATTATCATTACGAAAACTACCAATTTAATACCATTGTTTGTAAAATCAATTCATATACTGATACTGATGTACATGTTATGCATAGCTTAAAATTAGTGTACGAGAAAAAAACAAAAGCATCTTAAATCACATTAGTTTTATTAACATGTTTTTTTATAAACAAAAAAATGATAGAAACAATGAAAACATAGTATACATGCATATGTCTACAAATACATATATCATCACATATAAACCTATAAAGACGCCAAGCGCACACGGTGGCATGTGCGCAGATAAAGCTTATTATC…
GSR_IOB_NIMR_337	scaffold00003-scaffold05656-scaffold00010	KB664428	AGAP003168;AGAP003168;AGAP003168;	GCGCGCCGTTTTCGCTGCCGACGATCTGTGTCCTCTCGCGGATTCCGGCGTCGTGGAGTGCATGCTTGGGGCGCAACAGGCAGAAAGACGCGTAATTCTTATCATGCTCTGTGCGTTCGCGTTCTCTCGCTCTTTGCCAGGGACCGCGGATGCCGGATCGGTCTCTCCGTGGGCCAGCGCACTCCGTTCGTGACATTCGTGGAAGTAACATCACCGTTAGCGGTCGTCTACGTCTCCGCGTCCGTGTCCGCGTGTGCAGCTTCCTGTGTTTGCCGGTGGGAAACGCTCACTTATTCGACTATCTTCGCACGGAACGTTTTCCATTCACGATCACGGTTCATCTGTCTCCTAGCGTGTGTGTGTGTTTGTACTTAATTCCTTCCGGTTCCTCTGCCAGCA…
GSR_IOB_NIMR_338	scaffold00003-scaffold10915	KB665165	AGAP003879;AGAP003873;	GAGTAATATGCAGCGCACAGTCTACACGCAGCTTAACTTTCCGATGTGTCACGAGATCACTTTTCGTAAACAGTCAGGTGATAGCCCACATTCCGTGCAGAAAGTTTCGTGTTTCGTGATCATTCCTAGCGTTAACCTCCTTCTAAAACAGCCGTCCGTTTTGTTCGGAAAAGATGGCCAAGCTGGGAGTTTCAGTGGCGCTGTTCCTAGCGTTTGCCGTTATCGGCACCGCTCGAGCTTCTACCAACGTTCCAGTGTTCGTCTGGGGCAAGCCATCTGTTACGTATGTTCCGGCCCTGAGCCGCTACTCTAGCTCGGAGTTTGCCGCGCTGGTAGAAGCACAGATCGATGAAAACACGTTCACGGTCGTGTTCGCCGAAGAGCGCCTGTCGGCGGAAG…
GSR_IOB_NIMR_339	scaffold00092-scaffold22722	KB664345	AGAP002914;	ATGCTATTTTACTGAAAACTATCTGGATTCATCTCAAGTCACAAATTGTTTAGTCTAAAAGATACGAAACAGGCTCGAGGACGCTAGATCTTATTGAGCTTCTCTTCGATGTAACGAATCATTCGGAATATCAAGAACTACTGGTCGTAAGGGGGAGCGAGTGTCTAAATTGTTTCTAGTCATACTATCTAATTAAACTATGACGCAGAATATAGGTTTTGAAGGAAGCTAATGGGCTGAACCGCTCACTAAATATTCACTGCGCAGTCAACTGTCCAAAATCTGCTGCTATCTCCAGTTTGTCTCCATACAGTTTACTCTACCTTAGAACAGGATATAAGCCATAGCAGACAAGGCATTTTAATAACTTTTGGGCCTGAAGTCGGCGAAGATCGGTCC…
GSR_IOB_NIMR_340	scaffold00029-scaffold09675-scaffold15501	KB664467		AAGCAGTTCGCATTCGATGATCATCAAACGCACACACTTACACACCCCGTAACCGTAGCTTAAAATACTTTCCCCCCCATCGCGGTGGACAGTCTTTGCCGAACGTTCGTATTGAAAGGGAGAACCCGGCCAACCACTCTGTAGAAAACAACCTGCGTCATGGCACCGATTGTGCTGTACAGTACTCGCCGTACGCCGGCCGGCAGAGCCGTAGAGCTGACGGCGAAGATGATCGGGCTGGAGCTGGACGTGCAGTACATCGATCTGACCAAAAAGGAGCAGATGACGCCCGAGTTCCTTAAGATGAATCCAATGCACACGGTACCAACCGTCAACGATAATGGTGTCCCGCTGTACGACAGCCACGCCATCATTATCTACCTGGTGTCGAAGTACGCG…
GSR_IOB_NIMR_341	scaffold03300-scaffold00663-scaffold03027-scaffold00024	KB664433	AGAP006812;AGAP006812;AGAP006812;AGAP006812;	TGGCCTGCCATTTCCTTCCCGAGCACAGCAGGACGATCCTGACACTTACGACACCGATCTCGGGATCACGCCCAGTAAAAGATCGCACGCCCCAttttgattatcttttttttttcttcttttatttgtcgttacttttgttttgtgttcttttgttgtttgttttgtcttAACAAATTATTGATTTGTTTCGCTCCGGACACACACGCGGCTGGTTGCGTCCAATTTTTGTCAACCGTTTCCCTACCGGAAAACCCGTCTCCTCAGCACACATTCTCACACGCTCACTCACACTTTTTTGTTGTTGCTGCTGCTGTTTCCTTTCACTACCTTTATCCGGCTTTTTTTCCTTTCAATGCTTTTGTTTTGCTTTAGTAATCGATATTAATATATATACTC…
GSR_IOB_NIMR_342	scaffold00058-scaffold00766-scaffold00244	KB664732		CGAATGTTTATTTATATCGTGCTCCGGGGGGTTTTCCCTTTTTCTTTTCCGGTCGCAGCTCACCAGACAAGGGAATGCAAGTCAACAAACTGCCGACGTCTGGTGTGTCATCGATATCATATTTTGCTTTCAAAACATTCAGTGCGGGTGAAGCTGCTCAAGGTGATACAATGTTGGAACGCAACCGAGAAGGGGACACTACCGCGTTTACTCATAGAAAGTCATTCATTTATTTCTTCTCCAACATTTTTGCGCTCAGATACAAAAAAACCTTAACGATTATCTTTAAAAAAACAAACAAAAACTTGAATAACTGAACAGGAGGACCGATTGAGTCAAACTAGAATGCGCGATATATAGTAAAGGCTTGTGACGGCACATGTGAAGGCCCTCAAACCG…
GSR_IOB_NIMR_343	scaffold01773-scaffold03268	KB665343	AGAP009648;AGAP009648;	CGAGCTACAAGCGTATGTGAAGCGTCCAAAACGATGAAAGGCTCACAAAAATGGTCACAAATTATCAACCAACTGCAAAATACGCAAGCGGCAAATTTTCTTCACTTCACCCAAAGCAATGGCCAGCTCCTGTTCGGCGGTGTGATGAATTCTTTCCGATACACTGCGAAGAATGACTTCAAACTTGGATGCCTCGCGAACGCAAACCACAAACGGGAATCCAAATTTGGTTTTGTAGCTTTCATTCAGATCCGTTAGTTGCTTTTTGTCCTCGGGCGATAAGTTATCCAGCCCTACTGATGCATGCTCGTTCGATGAATCCTCCGACAGTTGATTGGTGTCGAGCATTTTACCGGCCAAATCTGGATAAAGTCTCAATATTTTCAGCTTCGTATCGGC…
GSR_IOB_NIMR_344	scaffold00053-scaffold07956-scaffold07025	KB664765	AGAP000073;	TGGAATAAGAAGTGTGAAGGGGGCGCGCGGTCGATTGTATTTTTGTAATCACTTCGTCTGTCGACACAATCATCCGTTCTGACAAACAATAGCAATAATCATTATACCATAATAGTAAGGACAAATCTGTTTTGCAACACTTTTATACGATTTTATGATGCGTTTTGCTGTTGTTTTACACTTTTTCTTGCGGGTTGTGCTATTGTTATCTGGGGATACTGCAGTGCCTGTCGGCGGCATCTGGAGCATCGTCTGTCTCGGAGTACATGTTACGCTTTCCCTCTTACGATTCTTCAGTGTGCTGTGTATATGCAGGGGTACAGGAGTTTCACTTCTAAACTTATAAAATGTATGTGCAAAATAGAAGAGCAAGAGTAGCTTCCTTCTTAAGAGCTGCAG…
GSR_IOB_NIMR_345	scaffold00493-scaffold00006	KB664288		GCAATATGAGAAATTCAGTTTGTTTTATTCCATTTGCGATACATTACACCATTTCTGCTCCAAGCATATTCATATGTAGTCATTGTTTGAGGTTGTTTAACGTGCTAGTGACTGACTGATAGCAGCAGTAATTACAATAACTGCTTTAGCAGCATAACGGTTACAAATACGCTCTACAAAATCTCTATCTGACTCAATAGTGTGGGTCCACTTAGTTATAGCCCTTCTACATCTAACTCTCACAATGCTAGTAAATGTTTTCGTCCGTTCCTTTTCGCTGAGGAGTATATTGACGATTTAGATACAAAGTTTGTCCATTATTCAAATACGACAGTACGATACGGGTGATGAAACGGGTTTAGTAATTGGTGCATATACGACCATTTGTACATTTCAAAA…
GSR_IOB_NIMR_346	scaffold05080-scaffold00030-scaffold02348	KB664888	AGAP010608;AGAP010608;AGAP010608;	ACACTATTTTTTTCTCCGTTTATCTTCGATTCATGTTTCTTTTACGTCTATAACTGCTTTCCCGCATTTGAATGTTTGCGTGTTTGTCTACGTGAGAGGAATTCTGTTTACAGCTTTAACCAGCTATACTTATACACAGTGTATAATATAGGTAATGTATACTATTATATATACTTTCCCCGAATCGCTACACAGCATTGCCACGATATTGGTTGTGTGTACTGTTTGCCTTACCCGGTATCGGTGTCGCTTTTTTGCCTTTTAATTTATAGTTATATTATCGCAATAATTGCATTATTGTAATATGTATGCGGACGAATCCTTGCGCCGGAAACGCTTAAACCTTCTTGGTGGCCTGGAGCGGGTTTTGCTTCAGCTGCAAAATGATGGAACGCATGC…
GSR_IOB_NIMR_347	scaffold00080-scaffold00341-scaffold08019-scaffold08953	KB664954	AGAP010893;AGAP010893;AGAP010893;AGAP010961;	GCAAAAATAACCGGACAAACAACTAATTTTTTTTAACGGATTCAATCTTCGTTATGCCATTTTGGGGTTCAGGATACCAAATTTAAGGTTTACGGTGGCAATGTGAAATATGGTAAGCGCTTTACCATGACTAATTGGTTATGCAAACCCTGTACCGTGTTGAATAAATTGTTTGCTTCACTACTAGGAACATAAAATTAGAAGAAAAAAAGAACTGCAAAAACAAATTGAAATATGTAAATTATACGAAATATCTAGAACGATACTATAAACAAAGCTAAAGAGAAGGAGAGAAAAAGAGTTAGTGAATTAAAAATAAATAAATGAAAAAACCGATAAAAGGTAGAGAAACACATGTACAAAAGATTAAAACTGAACAGACAACAGTAATGGAACAAC…
GSR_IOB_NIMR_348	scaffold00001-scaffold00688-scaffold02338	KB664481	AGAP002787;AGAP002787;	GCACTCGAAATTGATGCCTTTTGAAAGAGATTAGCTGCTCGATCTTCACTGAATAGTATAAAAATCTTAATAAGCGACATGGCAAAGGGTAGTAATACATACCTTTGCTCAGCCTCCCAAGCATAACACAAGCGCGCGCTCCAGCATTCTAGCACATTTTGTACAATCGATCTTGATTAACCTTTATTTATTGTATTCCGTTCCCGTTTTGTGGTTGGTTTTCTTCCCTGCTACCCCCTTCCTACAATCCCCTTCTCATTATATCCTTCTTTTTTGTATCTTTGCTGGCAAAAGAGGCCGCCTCGTAAGCTTTCAGCTGTTGCGATAGGGTGAAAATACATCAATCCAATGCAATCGAATCGAAACAATCTTACCACGTGGCGTGGCGATGGTTTCGCA…
GSR_IOB_NIMR_349	scaffold00070-scaffold18151	KB664459	AGAP005848	TCACTTTATTGGCCTAATCATCATGGTGGTAGCCTTCAATGAGTACTTATTGCCTCGAAAGTCCATCCACATAAGACCATGCGAGTCCTGAGCTTCAGTCAGCTTACCGCGCAGATACTCTCCATTCAGATGGCATCGATGACACCGATAAAACCACCAGCCACCTTTAAACGCCTTGGCACAGTTGAACGTCGCCTTGCTCCGATCGCGATCGTACGTCGAGAAGCTTTCGTTCAGATGAATGCGCATCGCGTCGCCAGCACCGCAAGGGCTACACTCACCCAGCTCGATGATGGCGTAGTTTAAGGTTTCCGATGTGATGCGAAACTTTTTGTACCGTGCCGCAGCGTTCACCCCGTCAAAGTCCTTCAGCACGATGGCCATCTCGTGCGGGGCAAC…
GSR_IOB_NIMR_350	scaffold01168-scaffold02107	KB664621		TTAGCATATCTTGTCATCAATTTCCCTAATCAACCGATCGACTTCGGGACCGTATGAGGAGCCCTCCGGCAGCTTGCCAGCCTTGATCAGTTCCCGCAGATCGAACGCCATCTTAAACGTTTCCGCCGAATTGGTGTTCAGCAAACACTTGTAGTACACGTACGCCCGCTGGTTTGCCCCAGCACGTTTCGATTGACCGACGCACGTCTCCAGATTCTCGCCATGTTTCCTGCTCTTCTTGATCTTATCCAAAAGCTTGATTAGCTTGTGGTAATCACCACTACCGTCGTTGTTTACAAATCCAACCGCCTTCATGCAACAATCGATGTGATTGTACATGTCCTGTGATTCGAAGAGTTTGTACTGACGAACCTCGCACAGTTTGCTCTTCAGCGACGC…
GSR_IOB_NIMR_351	scaffold00002-scaffold00606	KB664899	AGAP003725;AGAP003725;	ACTGTTAAACTTAAGTTTTATTATTCTATCAATCATGATGTTTCTTCAGCATGCGATGAAGCGAGATTTACACTAAATGAAGGGCTTTATTATCTCTTCTAGAAAGCGGCTAAACAGCTTAGTACTTCAACGGACCACGTGTCGGAACCATTCAAACTTTTCAGATTTTCAGTTTTAAAATGAATTTTGTTTTCTAAAAGTTTGAATTTTTTACTGAATAATCACAAGCAACGTGCGCCGATTGTAAGTCATAGGTGCAGTTTTTCCTCTTTTTTTTTTTCAAGGGAGAACTCTTATGTAGAAAAAGGCTTGCTTTCTCACTCGTTTTGTAATGTTACTACGCGAATCGGATTTTATGTGTAAAAGCTGATGAAAAATGGACTTTGCCGGATCTATCTC…
GSR_IOB_NIMR_352	scaffold00025-scaffold01539	KB665288	AGAP009173;	TCAATTCGTATTTGACAGCTCATTCTGGGCCTTGATCATCACGTACATCCTCCCTTTCTTGGCTACCTTAGTATTGGATAAGGTCCTCCCTTAGAGGTTGCTAAGGTCAGTCGTTAGTGTCATCTATCGACTCCGAATTTGTTATACCAATTGTCTATCTTGGCCAGAGTattcccgaatcatagattcacgacgataaagccgtcgagcgctgaaatttcgaatttcctcgttatgtttctgttgGGAAAATGTAGTAATGCAGTTAAGATAAGCGATCTCCAAAATGTCCAGTCTACTATTTCCAACTGATCGCATCTGATACTGAGGGTATAAAACAGTTCttctcgactgttttggccatagctgcttctaattatttaatgctgcaatGAATTG…
GSR_IOB_NIMR_353	scaffold00089-scaffold00096-scaffold14713	KB664554	AGAP003484;AGAP003484;AGAP003484;	ATTTGTTAACGTTGTGTTTTGTGCAACCTACAGTATAAGTTTGTCGAACGAAACCCCGAATCAAGCAACAACGCACCTTTCCCGCGCCGGTTTGGAACGGCTAGTCGTACGGAATCTCACTTTTTATCTCATTTATCTCAGCGTTAAAAAGTAATCTCATCATCAGCGTTTGTTTTGTTTTACGTCTGTGTGTGTGTATGTTTGTGATGTAAGGTGAATAATTAAAAAGGCATTACAAAAGGTGGTGTGGCGTTGTGGTGAACTCCGAGTGTCGGATGAAGAAAGCGTAACGTAAGCATCCCGCTTTTCCAACCCCCAAAAAAAGCAGGCCTCCAGAATCCTGCTGGAAATTGATCGCATGCAGCAGCAGATGTTACTGCGTCGTGTACTGTCGCTCTG…
GSR_IOB_NIMR_354	scaffold00112-scaffold01074	KB664877	;AGAP009962;	GTTTTCGGTTATTGTTCTTGAATTGATTCAGTTTATTTCCATATTTGCTTGTGTGTTGGTGTGCAACGTGTTCGCGCTGCACCCACGCCGCTGTTGATAATCGCTTGGATAAAAACTTCAAGTCCTAACACCTTCATCCATGAACTTCAAATGGAAAAGATAAAATAAAATCACTTACAATAATAATAATGCTTCAAATAAACGGATAAAAACACAGAGCTCGCGTGTATAATGTCTAACCGAACTCCGGTCCATACACGTGCGTACGGAAAATGAATGTAAATTACCAAAAATATACAAAACAACCATGTTCCCTATCATTCTACCATGTTCTACCGTTTCTAAAAAAAAAACAAAAACGGGTCATAATATAAAATTAGGCAAAACTATAATTCTTAC…
GSR_IOB_NIMR_355	scaffold00089-scaffold00096-scaffold14713	KB664554	AGAP003484;AGAP003484;AGAP003484;	CTGTTTCACCGAAGCGGTGCAGTTGTGTTGTGTGTTGCCACCCTCCCATTCTGGTGAAAAGCGTCCCGGAGACAAGTGCGTCCGATTTCCCCGATAATTAATGCAACAACGCACCTTTCCCGCGCCGGTTTGGAACGGCTAGTCGTACGGAATCTCACTTTTTATCTCATTTATCTCAGCGTTAAAAAGTAATCTCATCATCAGCGTTTGTTTTGTTTTACGTCTGTGTGTGTGTATGTTTGTGATGTAAGGTGAATAATTAAAAAGGCATTACAAAAGGTGGTGTGGCGTTGTGGTGAACTCCGAGTGTCGGATGAAGAAAGCGTAACGTAAGCATCCCGCTTTTCCAACCCCCAAAAAAAGCAGGCCTCCAGAATCCTGCTGGAAATTGATCGCATG…
GSR_IOB_NIMR_356	scaffold00021-scaffold00080-scaffold00599	KB664449	AGAP010963;AGAP010963;AGAP010967;	AACAAAACCCATCCTCCTAATGGAACATACTTAAATTCATTTATTTGTTTGTTAAATAGCTTTGCAATCACTGCATAGTGTTCAATACCGAGCAAAGGGAAATTTTGCTTTATAGCACATTGATCCGTCCATCCGGGTATAGTTGTCGACATCCGGAGGTCCATTTTTTCCAATCTATCTATTTTCCAGCTATGGAAAAGTTAGACGAACCGTAGATAAAGCACCCCTTTTGCTCACAGTTTGCGGTGTGTTTGTGTGTGTGTGTGTTTTTTAGCTAAAGTCCTTCTAAACAATCCGGCATGCGAAACAGGAGCCGTTGTGAGCAAACAGAACCAAATCGGCACCTTAACTTAACTATCCAAATCCAAGAAAGTAGAGTAAACGTAACGTAACAAATTG…
GSR_IOB_NIMR_357	scaffold00037-scaffold00050	KB665199		TCGACAGCAGTTTTATTTCCCTTTTGTTTCTTTTTTTCTTTTCTTCTCATTTGATCTTGTTTCGGGCATGTCGGGTGTTCTTTTCTTGACATTTGTTTGTTTTTTGCCCTTATTGTTTTCGGGTTCTGTTTTTTTTTTCGGTTGTTTTCTTCAGTTGTTTCCTTCTCCTCTGTGTGAGTTAAAATCGTTTCTAAACCTATTCCTACGTTAATGTTACAAATTTCAGGTACCGTTCTCACATTTATCGTCGTTCGTCTTCCGTCCAGCAAATACAAGAGGACCTGCCCTCACCGCGGGTTCATGGTTGATCGTTTTGCAAATTTCTTTATATTGTTTTGCGTTGTTGGTAATGTTGGCTCTGCACCTTAATTCGGTTGACTTAGTTAGCGAAATATGTTG…
GSR_IOB_NIMR_358	scaffold00026-scaffold02834	KB665065	AGAP004456;	GATTTGAACCCCGGTCCTGCCGTGAGAAGAGCGAACCGCCTTCTGTAAAATCAAGCGTACAAAAATCATTTCCAAATAGCACCATTTAGCAAATTGAGTTGTTCGGTGGCCCTCCCAAACGATCTGTTCAACGGATCTATACTATCCTCCTCTTAAAGCTTCTTAGTCAGACCAAACATTGAGGCTGCACAAACGCGCTGTATCACGCCCAAAATTACGCTCACGTGTCCTGCGCTCCATCATCCTTAAGCTCATACACCGGCGAACGCAGCTTAGTGGTGGCTTGATCAGTATTTTCCCGAGGCTCTTTTAAGTGCCTCTACGTCACGATCAAAGCTTTTGAATCGCTTATCTATTGCTTATTTATTTCCATTTCCATGCCATGAATCATTTACGCCT…
GSR_IOB_NIMR_359	scaffold05798-scaffold00105	KB664453	AGAP010276	AAAACACGACAACAGAAAGTAACATTTTCGGATTAACAAGCTTCAAAATGAAACCACATTGGAAGCAAATTCGCTACTCGCAGGCAAATCAAAATACAACAAATACAAGAATGTCATAATTATAAACATTTATATTTTTCATAATTCATCATCACCTTAGAAAACAAAAAAGCTACAAAACCGTACAACAAACGAACGTATCCAGGGAACATTAATGTGGTGTTTTCTGATACAAACAAGTAACTAAAAAGCAATAACAAAGGCTGTCAAACCAATTTGTTTTACAGTAGTTTGGCGCCCATAAGAGATAGCAGTAGTAGCAGTGGTAGCAGTAGAAGTGGAAGTAGCAAGCAGGGAAGAATAGATTGCATCAAATTGAGGCAAGCAAAGGGGCCGACG…
GSR_IOB_NIMR_360	scaffold00003-scaffold08651-scaffold02741-scaffold19607	KB665165	AGAP003873;AGAP003873;AGAP003873;AGAP003873;	CAGTGCTCCAGACACGACTCCACACACCACCATCACCGATGTATCACTAACAAAACGTCATCAAACGGCGTTAGTGAGGCGGTGCTTTATGTTGTTTTCGTGATATCTCCGTGCGTTGTGTGTCCGGTGGAAAATTGAATGTTTTGAGAGGGAGAGGAAAAAAAGAGGCGCATTGTGTGGTGAATGTGAAGAAAAAAGATAAATTGGAAGCAAATCCAGCTAACCGTTCGTCGAGGGGGAGGGCTCACGGCCCAAACGCCCCGTGAAAGTGTGCGTCGTGCTGCGGAAAAAACGGAAAGAAATAGCCGCACAAGCTACGAACCCGCCAAACGATGAGGATCCGCAGTCGGGTGCTGGCACCGGTCTCCACCCTGGGGGTGTTTATCATCGTGATGATCC…
GSR_IOB_NIMR_361	scaffold00111-scaffold00139-scaffold05526	KB664422	AGAP005350;AGAP005350;AGAP005350;	CGTTGCACGTTTGCTGTGCTTGTTCCTGTGCTGTGAGGTGTAAGTCACCCCCGGGGGTCTGTCTGTGGTTTCGTGCTGCATTATTGATGCTGAGCGAGAGTTGAACAAAAAAGAAAAAACGCAAAGCCCCAAAGTGTAGTAAGTGTAGTAAGTGAACGTGAAATAGGCAGCACGCAAAAAAAAGGCCACCCGTAGGCCCTTTCTAACTTGGCCCCGTCGCGCCCGTTCGAGGTGTGCCCTTAAGTCGGTCGGCGGTTGTTTGGTGCATTTACGTTAACGGCCGTTTAAAGACGGCCGCAGTGATCGCGAAACCGTTGCATAACTCAAACGCCCAGCAGTGCCTAGTAGTACGAAAGGGTTCGTCGCTTAGCCCGGGCATCGAAATCGTTCGATCGAGCA…
GSR_IOB_NIMR_362	scaffold02893-scaffold00039-scaffold18610-scaffold19264	KB664439	AGAP005728;AGAP005728;AGAP005728;AGAP005728;	CAATCCTAGCGTCCGTGTTGTTCCGTTGCTTCCTGATACTGCAAATGTTTTGCCTGAACCGCACAAGTTCCTTTCGCTGTACGAATGCGCTCCAGCTCGCATCAACAACGAACCGATTTGGTATAGCGGCCACAACAGCAGCAGCAGCGCGTCAAAGTGCCCGACGGAACGGTTCCGTCACCGTGAAACAGTGCAATTTTCTATCATCGCTGTCGGTGGTCACGTCACCAAGCAGCCGAACGTCGGCGTGGCAGCGGGTCCCCCTATTGCGTGAACGAAACACTCTCTCCATTCCGTGCGTGCACCGTGCTTCCGTCACCTCGTGGCAGCAGGTCCCAGCGACAGCGGGCAACAACGGTTGCTTTGTTATTTCTAGCTCGTCGCGAGTGTTTGGCTCGG…
GSR_IOB_NIMR_363	scaffold04644-scaffold00051-scaffold12237	KB664456	AGAP005324;AGAP005324	ATGTTAAATTTCAATCATTTATTCCATACTATATGTATATATTCTACCTGTCTAATCTCTTTGCCTTATACGACTGGTAAGTAAAATTTAACACAACGACGACGACTCTACCATTTAGCCATTtttgtttgtttgtttttttttcttcttccatttttcttgtttgtttgtttgcttgtatgctCAAGTATGCGTTTTGCGTTTTGCTTTTTTCGTGCCAGCTGTCTCTACTGCGTGAGAGGCTAGTTGCAAGGAATGTTGCAGAATAATTTTGATATTTGGTGTATTTGTATTTGTTTGTTTGCTTTATCTAAACGTTCTTAAATAGTACTCCTGCAAACTGTTTTTTTCTTCTTCTTTTTTCTCTCATGCTTTTTTGTTTACTATATAGTTTGCATT…
GSR_IOB_NIMR_364	scaffold00105-scaffold01628	KB664453	AGAP010265;	TCGGACATTAGATCTGTTTTGGATGTGAATGACTTAAAAATGGTCACTGTTTATCATTCCACTGTGATGTGAATCTGTTATCCCTTTCTTGCGTTGGTTCAACTATGGCAAGTGTATACGAGTGAGCGAAACAGCACGTGTGTTGCCGGTCTGAAGACGCTACGCTCGCCGTGTTTAAATTACTTCACCTGTGCCGCTACGAGCGATCGCGCACGAATCGAGACTCATCCGTACCGCGTGTGCTAGCAGCAGCTGCAGGCCAAAATGTTTTTGAGACAGCTAGTGCCGCAAGTGATTGGATAGTTTAGACAAATGTCGCTTCCTGTTTCCCAGGTGCATGGAGAAACTTCACGAAGATAAAAAGTGCTGCCCAACGCCCCGTCACAGTGCATCGTCCGC…
GSR_IOB_NIMR_365	scaffold00332-scaffold00069	KB664533	AGAP005807;AGAP005807;	GTTGAAGCGTTTGTCTGGGTGGTTTGGTGTTTTCCATCCGCGCTTTTTCCCCGCAAGCTGGATTTTAAAGTTTTAAAGTGCAAAGTTGTGTAGAATAATTTAAAAATCTATTCAGTGGAATCTGCCCCTGTTTTCCATCTTCCCAAACAAGTAAAAGCATCATTACACCACTACAACAACACGTAAGCAACCGGGCAAGCCCACCTTCTTCCAGAAATCACTCAGCATCGAGGATATTCGACCACCATTTGTTTAATTTGAGCACAAATCAAATTAAAACGAAGCAGCGCAAAGTTTGAGTGAAGCAACCGTCCAATTGATTGATTTTTCGTTGCGCCGATACCGAAAAGTTGTCTCATCTTGAGCGAAAGTATGGCGGCGACGCAGAAACGACTTGTG…
GSR_IOB_NIMR_366	scaffold00025-scaffold03436	KB665343		GGCGAACGGCACCGCATTTTCCCGTCCGGAGCACATCGCAGAGAGCGGCAGAGCATATCGTAGCAAAGCGACGCGTTTTTACCAAGAGTGCTTGTCCAAATTGAAGCCGAACCGGCCCCGTGTTTGTACCGAAATTGCGCAGGCCGTACCGTGTGAGAGAGGTTGCAAAATTCGCGCACATTCTTCCGAAAACCAGCAGCCAGTACACCGTTGTGTTGTGCTTCGGTTTGGTGTTGTTGTGTACAAGCGATCGTGTGAAGAAGAACGGTTGCCGAAAGTGTCCGGAACAGTACAGGAAAGCAATTTTCCCAGTGAACTCTAGCTCCAGTGAGTAAGTGAAGGTAACATTAGCAACAAAAATCTCGTCAGAATAGAGCAGCGGGAAGTTAAGTTGGTCAT…
GSR_IOB_NIMR_367	scaffold04418-scaffold03227-scaffold07278	KB664644	AGAP009515;	CCTGGTGCTGCCGAATAACAACAAAAAAAACCCCTCCCGAAAGCCCTTTTGCTCCCTTTAACCTGCCAGTGATATAATAATTGCATTTCACTTATTAAATAAACCCAATTTTGTTCTGCCCGGTTTCTTGTGCTTGCTATAAAAAAGCGGCAGGAAATTCCAAATTATAAATTGATCAGAAGGGTGTGTTGTTATTTCACTTGCCCCTTTTCTCTTCTTGTTACCCAGCTTAAGTGCATCAGTATTTTAAAAAATGGGGTATTGTTTAAACAGAGCGCGCGTTCCGAACGAGCAACGCGTCATCGGGCAAGATCGTGCAACGCTTCGTACGCTGACACGCGCGTTCATAAAGTTTAAATTAAAATTTTCTTTCCATAATTTTCATCCCCCTTTTGCCTC…
GSR_IOB_NIMR_368	scaffold03290-scaffold03263-scaffold00133	KB664497	AGAP009774;AGAP009774;AGAP009774;	ATATGTTTCGTCTTTTATTTGACATTCAACATCCGTGTTTTTCCAATATATATAGTCTGTCTGCTCTACCATCTCTATGCTCTACTACCACGCACCACAAACTTTGGAACCGTACACACCCAATCAAGGGAAAATTCGCTCTACCACTATCGTCCATTTTCCACACAGTATCCATCCAGCACAGAACATCCAGCCTTCCCTGTATGCTGTCTCTTCAGTAAAGAAGCATGCCCTGTTGGTGGTTGGAATGATTTGGTTCCTGAACATGGTTTGTTTTTTTTAAACAAATCTATATTGATTCCCTTTTTTTTGGTATTCCCAATTCGTATTCGATTACAGTGTAGATTATTTGAAGCAATTCGCGCTTTGCAAAAACATAATATACGAAGCAGCAAACGC…
GSR_IOB_NIMR_369	scaffold08681-scaffold00010	KB664477	AGAP007064;	CCGTTTCTTAACTTCTGTTCGCACACCGACAACAACAGCATCATCGAGCAAGAATGGTTGAGCTAAGTTCCAGCACCGATCCGTTCCAGCACGGATTTCCAAACATTGTGTTCATCATCCCGGCAATTGTCGTGGTGGGATTGGGAGCATTCTTCGGCTACAAGCTGTACCTATCGCTCACGGAGAAGGAACGCAAGCGCGAGGAAAAGCTAAAGGCCAAGCAGGAAAAGGGCAAAAAGAAGAAATGATTCCCTGCCGCTAGCAGTATCACACCCGGTACCGGCGGCACCGGCGAACGCTCGTCGCGTCGAACTCACAGCCGGCAGCAGCAGCCGGAGTCGCCAGTACAGCACAAACATTCCAGAGGAAAAAGACTTGGCAAGGCCTAGCGAATCCATA…
GSR_IOB_NIMR_370	scaffold00082-scaffold00324-scaffold01423	KB664455	AGAP007135;AGAP007135;AGAP007135;	CTGGTGAATGTGGGAGTTAAGTGATCTGGTTGCGCTGCTTGATCGCGAATCGCATAATCGCCGTGGCAGCCATTTTAGTTCGCCTATTGGAGTGCACACATGCCTGGCCGTCTGCAGTCGACTTTTCTCCGTTCGCTCGTGCTAACGTTCGCCGGTCGAGATAGTTGTGTGAAGCAAATCGAACATTTGGTGTGAAACGAACTCGAGAACATATATTGTGTAGTGAAAGTTACAAACTGCAAAACTATCCGGAACCGGAAGTGTTCGTTCGGTGGGAAAGAAACAACCGTCACCCGAAACGCAAACGAAGTACAATGAAAAATGGAGCAATTTGAGCAACTACTCACGTGTTGCGTGTGTCTCGATCGATACCGCAACCCGAAGCTGCTACCATGCCAG…
GSR_IOB_NIMR_371	scaffold01601-scaffold00011	KB664844	AGAP006995	CACGTTGTGTTAATTTTTCTTATCAATTTATAGTACAAATTGATTAACTATTCACTAATGGTAATGGTAATAATAAATCGCCTTGTTTCCCCACGATGATAATCAATAATTAATAACGAATTAGCAAGCAACAAAACTCAACATGATGCGCATTCAAACTGGAATATATTGTTTCGCTTTTTTCCTCTCTCTTTGCTTTGTTAAACCTCCTTACAAACAACGAAAAACAAAACATATACCGTAAAGAAAACAATCAATCTTGCACCGCACAACGCAAACGCCTTGTTTTTGAATCGTAACGAATCACAGTCATATACATGCCCTCTTCACTTTCTTATTAATTTTTTTGCTTGGTTTAACTCATCTGTTTCTATTTCATGGACGGCTGGCTGTGTATAT…
GSR_IOB_NIMR_372	scaffold02893-scaffold00039-scaffold18610-scaffold19264	KB664439	AGAP005728;AGAP005728;AGAP005728;AGAP005728;	AAtctctttcgctctcactcactctctctctctctcGGTGCCTTTTTAACACTTTCTCTCTCCCGGCTCGAGTTTGACAGTGCGCTCGCTGTGTGCGCGCGACTGTGTTGGACAGAGTGTATCGAACGCTGCAGAAGAGTTGGCTGGTCTTTTCTCGGTCTTGTTTTCCTTCCGTGCTTCGTACAGTTTTCTCGGCACTAAATTCTTTCTGACCGCTCGGTGTCCACCATTAAACGCCCGCTTACCCGCTCCATTACCTCTGAAGAGCTCTGTTTTCCAACAACACCCGGTTATAGCACAAGCGTGTGTTACGCCTTTTTTTCGCTCATCATTTCGCAGCGGCCACAACAGCAGCAGCAGCGCGTCAAAGTGCCCGACGGAACGGTTCCGTCACCGTGA…
GSR_IOB_NIMR_373	scaffold00076-scaffold04611	KB665176	AGAP000005;AGAP000005;	GCGGTCTTTGGTCAGACGTCCGTGTCACGTCGCACGTCACCCGGCTGTCAAGCGCAAGCCCAAACGCGCAACCACATGAAGCGAACTGTACCGAGCGCGCATCTCCAGTGCCATCATCAAAAGCAGCAACAAACACCCCCGGGTGTAGGAAGTGTAACCACATATTCTCACACACCGGTCGATACCGTtgtgtgtgtgtgtgtgtgtgtgtgtgtgtgtacgtgAGACTGATGTGTGAAGCAGTGCAGTGTGTGTAACCTTTGATTTACCCGGCATAACCCGGTGGGTGACAATTAACGCAACGCAGCAAACAAACAAGTGATAGAAACACAAGAAGAAGCCGCTGATACACAACATTCAACTGTCCGCAACCAACAACAACAACCGTCCAAAAGACCA…
GSR_IOB_NIMR_374	scaffold01219-scaffold00121	KB664799	;AGAP006410;	TGGTAATTCCGAAAGGACTCGAAAATGGAAAGCTGATACCCTTAGTAGCTGGGTCCGATTGATCGAAGGAGGTTTGAAGTCGTCTTTGTTCGACAAGTGAATAAGGGTCGCCTTCAGCTATAAAAAAAAGTTCAGATAATCTTTGATAGAGCTGAGCTTCCATAGGCCGTTACCCGACTCGTAGACCAATTGCCATTCTTCATTGCAGTTGATGAGGATTCGCAGTTACCCAAGGTATTCGACTCTCACATTTCAGAAAGTGGTACGAAATATGCTCGAAGGTATGGATATTCGAAAAGAAGAAACCCTCATGAGAGGAGAGGATTCTAAACCCGATTTTGAGAGATTGCTCAGACATAGATCGTTTCATTCGGCTTACGTCAATAGCGCCACGCTGAA…
GSR_IOB_NIMR_375	scaffold08851-scaffold00114-scaffold04542	KB665232	AGAP006463;AGAP006463;AGAP006463;	TCTCACTTGTGGTTGGCTTTATTCCGCGACCTCAAATCGTTGCCCGATCGCTTTCCTCCCTTTCGGTACACTAATATTCTGCACGATATCGAACGCTCCCCATGCTGCTGCTCCACTAGGAGAGCATAGGATTGCTACAATTCTACTGGCCTCTTCTAATGCGCACTGGGAACAATCATCGTCAGCTGACTAACTTATGGTGTTTGATGAGTATTTTCCACACTTCCCTACTTGTGAGCTTCCGTTTCGCTAAAATTACCTTTAAAAAACACACACACATGGTAAATTTGGTACCTTAAGAAATCCAAACACGAGACACGCAAGATTCGACATTGTTACTAACTACGGGTGCGCTTAAACTATGGGGACGAAACAAAGGGTAACCCCGACGACGTTACC…
GSR_IOB_NIMR_376	scaffold00412-scaffold00789	KB665043	AGAP012012;AGAP012012;	AGAAGCAAACATAAATATGAATATTACAAATCAAGGAAGAAACGGTCGTTTTCCCGAGGAGTACGAGATAGTTGGGGTAAGTAAAAGATATTTTTAAAACAACTGGATGACTTTAACTACATCTTGTGATGATTGTGTGTGTGTGTGTGTGTGTGTGTGTGTGTGTGTGTGTGTGTGTGAATTATTTTTCAATTGAATTAATTTTCTAGATGTGTTTAGACGATTAATTTTATTCGTTCTCGTTTTTTTTTAAATCGAATTACTCTGCATTTTTACTCTTTTCAGACACGTAGTACAATGCTATGCACCGATCTGATCGAACTTTTAATAGATTAATTCCAGTTCCATACTTCTCTAAGCTTTTTTTTTCATTATACAAAACAACCGTCTGAAACAAGC…
GSR_IOB_NIMR_377	scaffold04731-scaffold05264-scaffold00222	KB664675	AGAP003856;	TGTTAGGATTTGCATGAAATATCGATTTGCATGAAATATCAAATTGCATGAAAGCTAATTATTATAAACGAACCATAGTAGGGAATAAGAATTGAATTATAATTGACCAAGAATAAACAGTTGAAACTGAACCTTCGGCGGGACAACACTACACGTTTCACGAAAGAAAGTGCGATTATCGAACAATT
GSR_IOB_NIMR_378	scaffold00055-scaffold00161-scaffold22428	KB664551	AGAP001944;AGAP001944;AGAP001944;	NNttttttttgttttgtttgttttgctttgtttGATGAGAAGGCTGAGTGTAAGGGTGTAGGTCTAAAGGTTCTGCGCACATCATCATCCACTCAGCAAGCTCCGGAGTAAAGATTTCAAATTAGTCGCTCAGATCATCGCTCTGATGGTTGTTGTTGCTGCTGTTGTTGGCGGCACCGTTGTTGTTTGTCTTGTTCAGGTTGCCAcctcctcctcctcctcctgctcctcctccACTAccaccaccgcctgcgccgccaccaccactgctgctgctgccagcgccaccgccTTCTGCAATGGCGGCTCCACCGGCAGCGGCCAATCCCATCACGCCACCGTATCCTGGTATGCCACCGATGGAACCACTACCGCTACTGCTTCCACTGTTATTGTGAT…
GSR_IOB_NIMR_379	scaffold00111-scaffold00139-scaffold05526	KB664422	AGAP005350;AGAP005350;AGAP005350;	GTTGAAAGAACATCTTGAACCCCAAAGTGTAGTAAGTGTAGTAAGTGAACGTGAAATAGGCAGCACGCAAAAAAAAGGCCACCCGTAGGCCCTTTCTAACTTGGCCCCGTCGCGCCCGTTCGAGGTGTGCCCTTAAGTCGGTCGGCGGTTGTTTGGTGCATTTACGTTAACGGCCGTTTAAAGACGGCCGCAGTGATCGCGAAACCGTTGCATAACTCAAACGCCCAGCAGTGCCTAGTAGTACGAAAGGGTTCGTCGCTTAGCCCGGGCATCGAAATCGTTCGATCGAGCATTGTGGAAGTGTGAGCGCCAGCCAGTTGCCTAAGGGGAAGTGTAGGTGGCCTGTATTCGTGTGTCAGTGTGCCGTGCATTCAATTGTGCCCAAATCCCAAATTTTGC…
GSR_IOB_NIMR_380	scaffold00007-scaffold02003	KB664438	AGAP001220;	AGAGAGAGAATACGTTGACTTTGTTTAAACAGACTCCAAAAGCCAATGAATGACGGGTTTTAAGCTTTAGCTCCCACCCTGCGTGGGATGTAATCAATTTATCGCTTGTCGCGCTCGCAGCCGAGCGATCACCTATCACCACCGAGCGAAGAGGAGGGTGTACATAGATTGTTTGGCTCAAAGTTTTACTCAACCAAGGAAGGATGCGAGCAGTGGTGGTGGTGGTGCAGTATTATGAGCACTGACTTTTTAGCACGTAAGATGCATATAAAACACAACCTATAAATAGCTAGGATTAATTGTAATTCTTGTGAATATAGCTTAACGTGCGCTCGTAAACCATTGATTCAGTTCTCTGTAGTGTGTAGCTATCTTTTCACCCCTGTTTGGTTTTGATAT…
GSR_IOB_NIMR_381	scaffold00002-scaffold01265-scaffold21813-scaffold19998	KB664899	AGAP013057;AGAP013057;AGAP013057;AGAP003725;	TGTTATCCGACGAAATCGCAACCACCAGCATCACATCCGCCACAGTTGCCCCCACAGCCGGTCCAGCAAAAGCTGACGGCGCAAGCACCGAGCACCACCACAGCGCCCACCCCCTACCGGACGGACTATGAACTGTCCGGGTCGTATGTGTCGCTCGAGTGTCCCTCGCCGCCCGGTCCGCCCGCTTGCGGACCCGAGGGCCGACGGGGCGATCCGCAGGCTCGCCTTGCGAACTATCTGCGCACGCTGTACAACGAGCTAGCTTTAAAGGAACCGGTACTGCCGAGCTGGGTGCATCCGGTCGCACCCGGTGTCCTCTGTCCGGCCCGACTCGAGCCCGAGCTCCGTCTGCACATACACTCGCACGGGCTGAATGAAGCGATCGCCGTCGACCAGATC…
GSR_IOB_NIMR_382	scaffold20881-scaffold17347-scaffold13051	KB664702		TTTACCGATCATAAACCTCTCACGTTTATTAAAACATCTTTAAAAAACAATAGAATACTAAATTGGAGGCTTGAGCTAGAAAATTACCAATACAATGTCGAATACAAGCAGGGAAGAACAAACGTGGTAGCAGACGCTCTTAGTAGAAAAATAGAGGCTCCAAATGAAATTAATGCCAACAGCACAACTACCCTTGATACAAATCATTCAGCAGATACGTCAGACCATTTTTATATAAAATCAAGCGAAAGGCCTTTAAACTATTACCGCAACCAAATAATATTTGAAAAGGGCAATCAACATCAAGATTTAATAGAAACACCGTTCGCACATTATAGAAGAATTATTATAAAAAGAAGAGAATACGATGAAAATACGATCACTAATATTCTGCAGAAG…
GSR_IOB_NIMR_383	scaffold00286-scaffold00014	KB665088		CGTCGTATGAGCGAGACAGAGCATGCATGAGTGTGCAAAGAAAAAAAAAACAGAGTGGATTCATCTTTTGTCCCGTTAACTTTAGCAGCGGCTGACTGCAGTGAGCACTTCCGAGATAGAATCGCATCAACCCCCGGGGAACTCAACTGGTGCCTAGGCTGGAGCGTGCAAGCGCCTGCAGTTAGAGAGTTTGGATGTAGCTCGGGTTGTTGCGAAAAGAGTGAAAAGTGAAAAATCAGTGGATCCGCTGACGCAAAAGAGAAATCCCATAACACCACAAACCGTAGCTGCCGGGTTGCACCTGCACCACCCAATCCAATATCAGCTAGTGACTGCATCGAACGCTTAGCGCATCATCTTTGGTGGAAACAGCGGTGCTTGTGGCTTCGGCTTCGGGGT…
GSR_IOB_NIMR_384	scaffold00049-scaffold00166	KB664586		ATGCCACCTCTACTGCGAAAGGACTACTGCCACACCGACTGGGCTCGCTTTGGGAGAACCGTGGACCAGCTTATCGACAACACTGACGTTGGTCCCGCGATACCCGACGTTGACGCAGCAATCGCCCGGTTCGAGGGTGCCGTCAAAGCAGCTGAAGCGGAGTGCGTCCCGGAGAGGAGTGTGCGTGTACCAGCCGGTGTTCCGCAGGGCAGCATATTGGGGCCTTTGCTCTATTTGCTGTACACTGCGGACCTGCCGACCCTTCCCGTCGGTGCGGACATGTTCCTGTTTGCAGACGACATGGCCATCGCGACGAAGGGTAGGACGTTGGCAGAGTTGAGAAGCGGCGCTCAACGTTCGCTGACCATCATCGGACAGTATGCTTCCAGCTGGAAGATC…
GSR_IOB_NIMR_385	scaffold12143-scaffold00304	KB664444	AGAP004717;	GATTGTTGTTATGACGATGATGGAATAAAACAGAGCGCCAAAAAATGTCCACTGGATTTGGTCCACGTCTTCGTTTCCATCCCAACCATCCTTCTTCATGGCAGTTAGTATCTCTTTCTCGAAGGAATTACGTTCATTTTCAGCCTCCAAGTGTTCGAAGGTAAAGGCACCGAGGAAACAGTACGCCACAACCGTTGCCACCAGCGTCACGTGTGAGAAAATACATGTAAACACTTTCCACATGCAGCAAACGAAGGACATGCACTTGCTTCGCTGCTTTTTTTCTGGCTCGCCATAGGATATGGACATTTGTGGTTGCAGTTGTTGCATCGGAGGAGGAGCCGATCGTCTGGATGACAT
GSR_IOB_NIMR_386	scaffold13502-scaffold02629-scaffold03202	KB664936		GTATTCGGGTCACTCTAGTGACACTCATCCTACACGGCCTTTCCTGACCCTACAGACGGCTCGACTGTGGCCAAGGCTTTAACATATCTGCTGAAGTTGTCGTATTCCGCGGGCCTTCTGTCTCGGCATCTACCTTACGCACCTCATAGCGATCATTAGGCATCATCTTTGTCACCTCATATGGGCCATAGTATTTAGGTTTGACCTTTCGACCTACTACAAATTGTGTCACCGGCAATGCAACAAAATCGCCCACTTGGTATCGTTTCGCATCTCGTCTACGCAGATTATAATACTTCCTATTCTGCTCTTGTATCTTCGCAATATTTTCTCGTGCAATTTTACGTAAACCGTCACGTTCTTCCATGAAATTACCTTGCATCTCTTCTTCTAGCATCT…
GSR_IOB_NIMR_387	scaffold00097-scaffold08023	KB664544	AGAP008680;	CTACCGCCGTTTGATTTGACCTTGCTGTGGCTCCTGGCCGGCAGGTTTCGTTTTCGACTTGATGCAATACTCTTCTAGCGTGAGCGGTACAATGATGCCTTCCTTTTCGGCTTCAGCCTTGGCGGCCTGTGCTTGTCGTCTTATTATGTTAGGATATTCATTGTCCTTGCCGTGTGAATCTCGCCATCTTCGGTACATGACGGACGCGTCGACGTTTGCTGGCGAGTAGGTGTTCGGTTCGTTGAGCAAGGAAATCACGGAAAGCAGGATGGTACGTACGTTCTGCGTCGGGTTCCATCGTTCGCACGGCAGTTCGCCACTCTGCGGATCGTCAACCGGTGGATGGAGGATTGAGATGCAGAGATCACCATTCTTAAAGTAGCCGCCCTGGTAGAGTGT…
GSR_IOB_NIMR_388	scaffold00090-scaffold00461	KB664544	AGAP028141;AGAP008656;	CCGTGAACGTATGCCGTCGAGTGAAGGGTACGCGCGTAGTGAACAGCAAAGCTACGCCGCATGCACGCGTCCGAGTGATCGTAGTGAAGCAGTGTTTGGTATGGCACACGCGGTCTGAACCCGAAATGGGCTTCAAACTTCCGCAATAGCAGGGTGCGATCGTAAGAGGTGCAGATCACATTGAGGTGCATTTTTGTTTTTGTTGGTGTGGAATTCAATTTTGGTGCTGTGCCGTCAAACGGAAGTAAAGTGGCCGAAAGGTGTAAAGCTCCCGGTCAGCCTGAGTCAACTCGGCCGGGGCGGGATTATATCGGTGGGGCGCGCAGGAGGATTTAATTGTAAAATCGATGTGTCATCATTAAGTTTGCGATCGCGTGAAGGAATGTGTGGTCGCCAATT…
GSR_IOB_NIMR_389	scaffold00080-scaffold01370-scaffold11193	KB664954		ATGGTGGATAGGAACCAAAACAGCACTTCCCGAAGCAGCAACGCACAGATGATCGTTGGCGGTGGTGGTGTTGGTGGGGGCAACAACGTGCACAACATCACCCCCGTCGGTGTATCCAGCAACAGCAGCAACCAGCTTACGTTTTCGTCCGTATACCTTAATGCAACCTCGAACAGCAATGCTCAACGGCTGAATTTGCTGTTCGCGCTGGACGAAGGGGCCACCGGGCCGTCGCAGCACAAGCAGCAGCAGCATGGCGGTGGTGGTGGTGGAGGCGGGGCACATCATTCCCTGTACCGTACCGCTTCCCAGCCGGCGACCCGCCACAAGATGGAGGATATCCTGGATATGCTTTCGCTGAACGCTGGCATGAAGCTGCTGCCGGAGCTGACcagcttc…
GSR_IOB_NIMR_390	scaffold00065-scaffold10608-scaffold21236	KB664461		GTTGGCCGCCATCAGACCTGTGGCTCTCGTGGCGTTTCTCGTGACTGAGTGCTTGCCGGCTCCGTAGTGCCCACCGTATCTTATCTTAGTGTTTGGTGTGACGGGAGTGTCACAGTGCTGTGTCGTGTGTCGCAACCGTTTCTGGTCACGCTCGAAATGATAAATTGATTCAGTGTTTGCGCTAGTGTCACCCCTACCTTGCCAGCAACCAGTGCTAAACGCGTGACGTGTGTAATGAGATATTAAAGCGTACACTAATGAGCAGTGTAAGCTCCGCACTAAATTGATCGGCGATTTGTTAGTGAACCACGCGCGAGTCTTTATGCAAGTGTGCGATGTGTGCCGAGACAACTGGTCCTGAAGCGAGTGTGCGTGTGTGCGCGTGATGCAGTAGTTTGC…
GSR_IOB_NIMR_391	scaffold00017-scaffold06225	KB664555	AGAP008467;AGAP008468;	CTTGCGGACAATTTGTTGCCCCATGTTGAACAGCTCCAGAGCTCCAGATTGGTACGTCGAGCGCAGTGTATCGGTGGTGTTGTTAGGGATGGAAGATTACTGGTGCGAACTAGTGTGGTGTTTGTGGGTAAAAATCTCAACTAAAGCAGGGAAAGTGCCGTGTGCTAGGTCGCCATCTGTACGGTGCACGTCAGTCAATTGAAGATGATCAGCGTTGATTGAGATGCGCACCCCGGGATAAGAATAGCAAATCGAGATAATATGGCCAACTGTGGAGTGTGTGATGCTGCTGCATCGTCCCGGACATCTCGATCCCGGTTCGCGATGACAGTTGGCCAGCAGTATTCGGCGTTCGAGCAGCGCCATGACGGAGGTCAAGGCATCGCGTGGACATTGGGC…
GSR_IOB_NIMR_392	scaffold00775-scaffold00076-scaffold19954	KB665176		CGTGCCATACCGGAATTCCTATAGAGGCAAACACCCCGCGGAAAACACACCCAAACGTCGTCCAGCAAACAAGCAGCAAGCACCCATCGATCAGTATTTCCCCGTTCAGGTTGACTATTACTATCGTGTTTTAGTAATCACCAGTGTGTGTGTGTGCGCTAGTGCCGTGTGAATAGTGTGACGACGCTTCGTCTTTGTTGCAGCAGTTCTAGTGGAAAAAGTGTTTCCCCATTTTCTCAGCGACGAAAATGGTTGCCAGCGGTAAAATGATGAACGTGCGCGTCACGACGATGGACGCGGAGCTGGAGTTCGCGATCCAGCAAGGCACCACAGGCAAGCAGCTGTTCGACCAGGTCGTGAAGACGATCGGCCTACGAGAGGTCTGGTTCTTTGGACTAC…
GSR_IOB_NIMR_393	scaffold00060-scaffold02612	KB664510		TCATCGCCCGGAACCACCTACTTTGCGGAACTTTTTCTCGCCATTCTTCGCCTTGGGACAGAAGAGCGATACGGACGCTTCCCGTTCGCCCGACTCCTGGCAGCACATGCACGAGCGCTCCATCTGCCAGATCTTGCTGCCGGACACCTGGATGTAGCTGGCGCACCGGCCGATGCAGGCAAAGGATGGGATGGGTTTCGGCACGCACCCCGGATACTGGAGCACGTGGATGACGGGCGTTACCTGACAGTCGTCTGCGGAGTAGTGCGATCCACCGTCCTCTGACCAGGGACGGGCCGCGGTGGAACGATCGGACCGACGACGCATGGACATTCAAGGGAATGTTGGAGTGAGAGTGTGTGTGTGAGAGAGAGAGAGAGAGAAAATGGGAAAAGGAAC…
GSR_IOB_NIMR_394	scaffold05646-scaffold00083	KB664583	AGAP005408	AAAGCGACTGCTTGCATCGTTTCACCTTAAAATTTCCAATTTTATTTCATCCCAAAAACAAAAAACATACTACGAAAGCAAAGATTCCATCTCCTTTTTCGATCCACTATGAAAATTGTGTCCGCATCCTCCTGTGCTCATTGTTTTGCTAACTGTTCGTTTCATTTGTACCGCTCGATAAAATAGCTTGCCTGTGTGTGTGTGATAAACGCGTATACGCAGGCATCTCTAAAACAATAGGAATATATAGGCTCTAAAGGAGAGGAAAAGGTAGAAAACAAAGACCTAAAAAACGACGATAAACACTTTGTTTTAAATCGTAAAATTTCATCTAAACGATTATGTTTAAAACATGCTTCACACATTACGTACAGCAGTTTCCCTTTCCCCCTTTTTTTG…
GSR_IOB_NIMR_395	scaffold17275-scaffold00120-scaffold00384-scaffold16524-scaffold17376	KB664566	AGAP008538;AGAP008538;AGAP008538;AGAP008538;AGAP008538;	ACGTGTTAAGGGAGCTGAACTTATTCTAGGATACACGGTAAAGAAGGTCGGTTACCTCCAAGAACTGGGGGTTGGGTTTAAATTTCCTCGTAGCTTCGACACTGGGGCACCGGTCCGGACCAATCGCCTTCGGGCGTGCAGCGGGGACGCTCTGGTGGGCCACCGTTGGCACCGTGCTCGACGAACCCTGGCCGACACTGGACGGTCAGGTAATCTCCCGGATCGTAGTGGAACTTGAGCGGCGCAATCAAACCGTTCGGTGGATCACCGGGATACGGACACTGTGCTTTACAGAACGGGGGCGGGTGTGACCAGAATCCGGTTTCGGTGCAGACAATTGACGCCTCGCCGACGAGAAGATGACCCTCGGTGCAGCTGAACGTTACCAGTGCCCCGACC…
GSR_IOB_NIMR_396	scaffold03517-scaffold05897-scaffold00186-scaffold07035-scaffold09131-scaffold02365-scaffold10869-scaffold00039	KB664439		CTGCAGCTTCGTTCGCGTCCGTGACGTGCAGCGACAAAGGCTTCTTCCTTTCGCAAAAACGAGGGGCGAATCAGTAAAACCGCGTTCTCGGGTGTCCAAGAGTGTCCGGTCGTTCAATTCCGAAGTTGCGGAGGTGTTGTTGTGCGTGTACTACTGAAGGAGTATTGGCGGGCATTTCTGGCAAGCTAGGTGACATCAGAACACGGGTTGACAGCTGCAAGTCCACCAATTCCAGTGAGCTAGAGCATCCGGGGGGGAGGAATCGAGTCGGACACTACTGTGCTGAGCTGTGGAACGCACCAGGCACAAAAAGAGTTCCAACAAAACTTGTTGATCAGAGTTCCTTGATTGGGTGAATAACGCAGAACCACCACCACCAGCGCCTGTCTGCCTTGTGGT…
GSR_IOB_NIMR_397	scaffold00042-scaffold00279	KB664443	AGAP009254;AGAP001448;	CTATTTCGAACGTATATAGCGTTACTTTTATTACTGGTTATTATTACGATAATAGGCTTACAGTTTCAACGAGTGCTATAATAAACTAGGGTTATAATTTTGATAGGCGCACCCTCATTCTCTCTCTTTCGCTCTAGAAATTAAAATGATCGCCTTGCTTCTTAGTTCCTCACAGAAATGGGGGGGGGGAGAACCAAGACATCGTTCTGTCCTTCTACTACACGAGATTCATCGAAGGGCATCCGAACTCTGCATTCCACCTCCAACTGTGTAAACTCTAAGCGCAAGGAAATCTCATGGGTCAAATCAATAAATTGAAAATCATGCCGATTTTCCTTTCCGGTAAGGAATCTTTCTGGGAGGGCCGATATTCTACACCGTCGTCGACGTAGCGGAGAA…
GSR_IOB_NIMR_398	scaffold20665-scaffold16563	KB665332		TGAATCGCTTTACAGTTAATATATTCTTTATTGTGGCTGTTACAACTTTCACAAATACCGCAGAGCAAATGGGAAAATTGCAATAAAAAAAAGCACAACGCACAACAAAAAAACAGAAAAGGGGAGGCCAATTTAACTGGAAAATGTATCATTATTATTAACGAACTTCGTCCAGCCACCACTCTCCCCCTCTCCAAGAATCCACTACATTCCCCCCTGGCGCTAACCAAGGGGAGGGGTGAGGGGATTGGTGAGGGGTAGCGCGGTAGGTGAGCTATGAAGACTATAAAAAAAACTTATACGAGAGCAGCAGAAAAATATAATAAACAGTTTCATAAACCTAAGGCATTCTTCTGCCAGCTTATTTAGACTTGTGTGAAGGAGATATCTCGCGCATTT…
GSR_IOB_NIMR_399	scaffold01901-scaffold00001-scaffold01401	KB664572	AGAP002914;AGAP002914;AGAP002909;	CACACACACAAAAGCAGCCGGAGGTGAGAAAGCACCCAATACACTGGAAAACACAGTGCATGACGAAAGAAATGTTCAACTTGTTTTTGTAAAAAAAAGAGAACGAATAAAATGGAACACAAAACCCAATCAAAACTCTCTTGCTTGCCTCGTATTATCTGTTTCTTTATCTGCGGAAAATTGGAAAGAACACAAGGAAAATCCACGCTCAAAGGTAATGTATAGTAAAATTTTAGCTTTTTATTAGCACAGAAAACCCCAATGTCGGTGGAAAATCCCCTTTAACGATCTACCGCATCGATTCGGCTAGCTCGAACGTTCGGGCCCCGTTGCCCGGTTGGGCCAGATAAAACTGGGCCCGATATTTGCCACCCGTTTTGCGCGAATAGATCGTGTCCA…
GSR_IOB_NIMR_400	scaffold06150-scaffold18738	KB664511	AGAP012165;AGAP012165;	CGACGTGCAGGTGATAATAACAAGCGATTCAAGAGTATGGTTGGCATACTCGACCTAGCGAACGTAACGAGCGCCCACTTCCTTCAGTTTACGCCAACGTTTGTGAAGAAAATGACCATGATGAGCCAGGAAGGTTCGCCGCTGCGCCAGAAAGGATTCCATTACATCAACACACCGACCGGATTCGAGACCGTGTTCAACATGTTCAAATCGTTCATGAGCGAAAAGAACCGATCGCGGCTGTACGTACACGGAAGCAATCTGGAGAAGCTGTACCAACACATCCCGAAGCGCCTGCTGCCGAAAGAGTATGGCGGTGAGGGCGATTCGCTGAAGGACATTACCGCCACCTGGGAGAAAAAGATCATGTCCTACCGGGAATACTTCCTGGAGGAGGAC…
GSR_IOB_NIMR_401	scaffold02626-scaffold01927-scaffold00003	KB665376	AGAP003790;AGAP003790;AGAP003790;	GGGATAAGAGGCGTTTTAGTGATATAAGCTTCTATAGCTATCGGCTGCTACCCATTTTTGAAAAGCCCTACCTCCGTCGAGTGTGTACAGTTGATTCTAGGTACAAACAAACCACACCGAAACCATCAACAAAATGAGCTCGCAGTATTATCCATTCCAATGCACACCGACCGTCTACCCGGCCGATCCGTTCGATGCCAACGAAGATGCGGCCACGCTCCGTACCGCGATGAAGGGTTTCGGTACGGACGAGAAGGCCATCATCGAGGTGCTGGCACGGCGCGGTATCGTACAGCGACTGGAGATCGCCCAAGCGTTCAAGACCTCCTTCGGCAAGGATCTGATCAGCGATCTGAAGTCGGAGCTGGGTGGCAAGTTTGAGGACGTGATACTGGCGCT…
GSR_IOB_NIMR_402	scaffold17347-scaffold00030-scaffold00079-scaffold00223-scaffold00137-scaffold01353	KB664703		acgcttgacaaatatttaaaaaatatccggtaaaaaacacatttcttgtaattcctttttttcaaagatgttaaataaaaaagaacgcatagattgcgacatagtgatcatgtaattagacaataattatttactgcgctttgaacatgttacaatgctcaaaaacaaATATATAATTATGTGGTATAATCACGCGCACTTAACGTATAGCGTTGCTGCTGGTATAACTGGTATAAGACCAGCAGAGTTAGAGTGATAGAGTTGAAGGTACGCGTTCGAAGCGAGTAAAGCTGCACGTTCTTCTCTCTCGGAACGCC
GSR_IOB_NIMR_403	scaffold04814-scaffold00295-scaffold00060	KB664510	AGAP002513;AGAP002513	AAGATAAAGTATGGTTTGGACTTTTATTATGCGTAATTACTGCCGAGCTTCTCTCTCTCTCTTTGCCTCGGTTATTTCGTGTCGTTCTTTTTTTGTTGTTTCTTTTGCTGATAGTTTGATTTTGGTGAGTATAGTTTGTTTTGTTTTTTCGTTAATAATGAATTTGTTTGCGCCATTTGCTGTACGTGTTTATCGGCACATGTCTGGGTGCCAAATTACATGCGATTTTTGTTTTCTTCCCAAGAGCTCTAAACCGAATTTTGATAGTCGAACTGTTTGAATGTTTGTGATAATTGCGTTTGCTTCTATTTGTTTGGATTACTCTCTGGTGAACCTACGGGTGAGGTTACCGATCATCACTCCCCATCATCACCACCCACCACACTTGGCTGACTCTTT…
GSR_IOB_NIMR_404	scaffold02073-scaffold00105	KB664453	AGAP010283;AGAP010276;	GATCCCGCAAAAGGGTTCGTCGCTTCGGTTTGCTGCCGCTGGTGCAGTCTACAGTTGTGTTCCAGTGCGGTGATCTTGTCGTACTATCAGTACTTTGATTGGTGACTGCAATAGGCGTTATATAAATGTTGTTATCGCAGCGTTGTGAGATGCTTTTAGTGAGTGAGTGAAATTGTGTCGTTGCTTGTGTTGGAATAGGCGCAACCGAAACTTGTGAAGCGGCATTTGAACATCATACTACAAAAAGATCGTTATTTATCTGCCTTTCTTTTGACAAGGCCTTAAAATGTTTCTAGCAACAATAGGATAAAATGAGAAACGTTGCAGCGGCGCTGTTTGTTATTCTCACCATCTTCAAACTAAGGGCTGCTAAATGTTTCGTTTCGTCAGTGCTTTGCT…
GSR_IOB_NIMR_405	scaffold03235-scaffold00046	KB665343		TTTTACATTTATATCTGATTCTATAATCCCTCCTTACTGACTAAGTTGTGTATATACAAATAAGGTGCGTGTGTTGTGAGGATGTGTGCGGAATTAACGGTTTTCCCATATTATGCACGGGAAAGTACGGTATCTTCGCAAAATCATGCACATGAACGACACGAACATAGGCGGTATGCTACGTAATCGGGGGGACCCTCAAATTCTTCCTCTGACAAATTTTCGCCATTGTCTCTGTAATGCTTTGTAGCAAGTAAAATGAATATCTATCACCAGCCCAGCCATTGATGAACATTGCCAAATTCCCAGCACCAGCGCAAACAGAAGTAAACTTTGGCAATATCCATCCACTGCTGATAAGATCGTCATTTCGACTCTATTACTACCGACGCTCCTAGT…
GSR_IOB_NIMR_406	scaffold00006-scaffold00751-scaffold03744	KB664288	AGAP007737;AGAP007737;AGAP007737;	ATCGCAATGATCATCATTCATATATGCACCGTCCGCTCGCGTTGGAGCAGCTGTACCCGCTTGTACCCGCTGCTGCTACTGCTGCTGCTGATGGATTCCTGTCGCTCAACCGTCGACGGGTGACGGCTGCCATGGGGGCGCACACAGGCCGGCACAGTACACTTACACCAGCACAAGCCGTATAAATTCTGATCAACCGACATCTCGCAATTTAGTTGCAGTCCGATATTTCGTACGAACGATTGGAGACGATTTGCTGGAGAGCAGAGCGATCTTGTCTTGGTTTCTGTCCGTCGAGCTGTCACTGCTGCTGCTGCTGCTGCCGTTGCCGCTGCCTGGGGTGAAAGATTGTGCGCTCGTATCAAGGTCTGTGCCGTGCCCAATTCCGCTGTAGGGATC…
GSR_IOB_NIMR_407	scaffold13024-scaffold02955	KB664525	;AGAP005772;	TTTATCGCACACACAGTAAGTTCACGCTACTGATACtaatatttatatatttcattataatttaCATACAAATGGCTTTGGATTGTTGTATTACACCCCTTTGCTGTTACTACATCCACTAGCTGTAAATCTGAGCAAGTAAACAAGCAAAAACTTCCACATTTCCTCATGACACTCTCGCGGTTTACACCTCCATACACTTTTATACCCGAACTAAAAGGGATCGTAGGGAAGAAAAGGATAAAAACGGTACAGAAAACCTATCACAAAACAAAAGCCTAACACAAATCAGTTCGACGTCGCGTTTCATCACAATCCGAGTAATAGTAATCCGTCCTACGGTTCACCGGGGGAAACATATTTTCGTGGCGAGAGAATCGAATAGTATATAAATCGCCG…
GSR_IOB_NIMR_408	scaffold00099-scaffold01800	KB664430	AGAP009464;AGAP009464;	TCGGACGGACGGCTTTCGCAAAAATCCATTGACTCTCGACACTCGGAGGTCCTTTGTTAGGTGCAAATCAATCATGTACTTCAGGTTCGCAGTGAGGCATTAGCTGCAGTTTGCAGTCAAGAAGTTGCAGCCAGGCCGCTTAGTTTTGCTTCATGCTGCTTTGCTTTATTGTGGACAACATCATCGCTGGACAAACGTCATTCTTTCCGCCATGTAAAAACTTCCATAGCTTAGTTCGAAGCTTAATACATTCATCGTAACTTCGGTCCTACCTTCTACATACTATCTAACTTTGAAGATTCTTGGCCAATGGTTATTCGTGTACGGGTAAAATAATGTCTATCAAAATTCGTCGCTTCACATTCTTCGTACAGGCTACATACATATAGTATACAAAAC…
GSR_IOB_NIMR_409	scaffold04617-scaffold00049	KB664586		ATGCACATCCAGGCACAGCATCACCCCGAGGTTCAATTCGGGTTTCGGAGACGACATGTGGCTATGCAGCAGCTCCAGCGTGTCTTGAATGTTGTCGACAAGGAGAAACTCTGTGGCAAATCCACTGCTAAGGCTTTTCTCGACATCGACAAGGCGTTTGGCAGCGTTTGGCACGATGGACTACTGCATATGCTAATGCTTCAGGGCTTTCCTGCTTATTTGCTTACGGCAGTCTACTGTCCGCGGCAGTGCACCCTGTCGCGGAGAGCTACGTTCCGACAAGAGCTACACATCATCACCAGCAATCCGGCCCGTTCACTCATTGGGGGTGATCTCAACGCCAAGCACCAGTTGTGGGGCAACGTACGGAGCAACACGAACGGAATCACCCTGGCGGAC…
GSR_IOB_NIMR_410	scaffold06150-scaffold18738	KB664511	AGAP012165;AGAP012165;	ATTGTTGTTGAACGCTCGACGTGCAGGTTGGCATACTCGACCTAGCGAACGTAACGAGCGCCCACTTCCTTCAGTTTACGCCAACGTTTGTGAAGAAAATGACCATGATGAGCCAGGAAGGTTCGCCGCTGCGCCAGAAAGGATTCCATTACATCAACACACCGACCGGATTCGAGACCGTGTTCAACATGTTCAAATCGTTCATGAGCGAAAAGAACCGATCGCGGCTGTACGTACACGGAAGCAATCTGGAGAAGCTGTACCAACACATCCCGAAGCGCCTGCTGCCGAAAGAGTATGGCGGTGAGGGCGATTCGCTGAAGGACATTACCGCCACCTGGGAGAAAAAGATCATGTCCTACCGGGAATACTTCCTGGAGGAGGACCAGTACGGGACGG…
GSR_IOB_NIMR_411	scaffold00056-scaffold00023-scaffold00175	KB665121		ACATAATTCATTGTTTATTTCATTGTTCATAGTTCTATTGCTGATAGCAGGGGGGGACTGGAGGAGTTGAGGCTTTTCGTTTTGAGCGGTTTTGTGGTAGACTTATCGGGAGAGACACACACACACACACACTTCGACATCTGTTTTCTTCCTTTTGTTCTATTCTTTTGAACCTTTTTCTTCCCCGGCGGACGTATGTATGTATGCGTGTGTGTGTAAGTACCTCCCCTCGACTTTGTGTTTTCTTCCTCTTCCTTCCTTTCATTTCATCAGGTATTTTTGCGTATGTGTATGTGTGTGTGTTTGTGGTTTTCCCTGCCTGGGTTTCTTTTTGCTTTTTGCTACATAACTTTTCTACATAAATGCAACCATTAATTGGCAAACAAAATAGCAGGAAAA…
GSR_IOB_NIMR_412	scaffold00035-scaffold01769	KB664755		TTGGTCGGCTCAGTCGGCTCGGTCGCTCTAATTTCAACTGTGAAAACTAGAAACAAAGGTTCGTTGGCAAAGGTTTCGGGAAATTGAACCCCACGATATGCATGGAGCGTAAAACAAGCCGGTTAATTTGACTATTAAAGTGCGTTTAGGAGAGGCATTGAAATTGGTGGATCGTTTAAAAAAAAAGGTGGAGGCCGGTTTTCCCCCTACTTTGGTCGAAAGCAAGTGCAAAAAGTGAATTTTCATGGTGTTGTGCAGTGTTCCGTATCGTATCAGATTTTGCAAATCACTTCCGGCGGCCGTCCTCCGAGTGTGTGCGTGTGTGTATGGTGTTTGTGTGTGATTTCTGAAAAAAATGCACCAGATAACGGCAC
GSR_IOB_NIMR_413	scaffold00004-scaffold07813-scaffold03136	KB664448		ATAATTTAAAAGCACTTAAATTACCCGCCATTTATAAACTTTAACTTACGCTAAACCAAAGCTTCACCACAAAACAGGACGCGCGCGCACCTTTCAACTCTCGAACCCGCCCGTTATAAACTAGCTAAAACCCCTTTAATTACCTCCCGTTACGTTGCGGTGTGCAGTTGGGTGCGTTGTGTGTGTGTGTGTGTGTGGGTGCGTGGTGCACGCGAGGCTTAATTCACAGTAATCACGCCACTGCAGGAGACAGAAGTATTTTAAAGCGGGCGAATGGAGAAGAACGCCTGAAATATGTGAGAATTGCAGCCGCAAGTTGTCCATAGCAAGCCGTGCTAGTGGACAGGCCGAATCGTGTATTACGGAGATCAGCGCTGCAACGGATCGGGCAGTAGAAGG…
GSR_IOB_NIMR_414	scaffold00023-scaffold01727-scaffold00878-scaffold23177-scaffold00030-scaffold00004-scaffold00047-scaffold00007-scaffold00036	KB665243		TTAGGAAACGTTAGGAACCTTTCACTCTTGAAACACTTCGGAGGGATAAAATCGTCAGTGACCCAAATAGAATGTGACTCAATTCTAATACATCGAAGATGCGCTCGTCGATCAGTTTTCAACTTCATCATCCGACAATCATCCGAATAATGCGTTCAACGTTGGCCACTGCAACAATCAACCCGTAATGTAAATGGATACTTGCTCGTCAATTCAATCTGCTGCACATCTATCAAAGCGTTTTTGTTGCTTCGTTCTGTAAAATGACTCACCCAACGGTGGAAGGGTGGGGCAGATAGATAAGTGGCCCCGATGGCCGCAGCCCGGCCAAACAATGGCAGCAAGCAGGACAGCACCACGAACCAGCCGATGCAACGCCCAAAGGTACCCCAGCACCAC…
GSR_IOB_NIMR_415	scaffold00278-scaffold00046	KB664488	AGAP004619;AGAP004619;	TTTTTTGCTTGATTCTCTTTATTATTTTTAATAATTACTTACTTCTCCTTACTACGAAATAAGGGTTTGCTTTTTGTTTTGCTTTTCTCTGCACAGTTTTACTTTACTAGCGTGTGGTTGTGTGTCCGTCTGTGTGTGCGTGTGTGTGTGTTTGAGTTTTTTTACATCAATTAATAATAATCCTCATTTGCGTTATACGTTTTACTATCTTAATCTATACCATCCTGCCCCAACGGACGTTAGGAGGGGAGTTTTATATGTTACGAAGCACATGTAATTAGATTAACTGCACACGACACACCACACACTGCACACACACACACGCACAATAAACAATAGGGTTTGAAAAAGTTGGCTCCAATCGGTTTCACCTAGTCTGCTGCTGCTACTGATTGATTG…
GSR_IOB_NIMR_416	scaffold06814-scaffold00004	KB664448	AGAP000457	GGAGGGTTGAGTAAAAGGTAAACAAAGCGTATGTAGTGGTGGTCCTATTTATATACGGAAACCCGTTCTCGAAGCTTTTCCCCACCCAAAAGCTTTTTTGTTTTGGTTTCGCTGAACAGCTGAGCTTCCTGAAGGCTGCAAAACAAAGAAAGCAAGCGCACAAAACCTGTGGATGATACAAATTTGCTGTAGGTATAATTATATTTAATTTGCAATTGTATTTCTGCCGCCCTGGTGCAGTGACGTTAGGATGTAAAACAAGCGGGGAACCAGCGAGGAAACGTTGGTCGGGTGCGAACCGATTAAATTTCCCCCAAAATTTGACAGCACCAACTGCAGAATCTGTTTGCGGAACCGTTTGTTCGCATAACGTCGCATACAGCTCGTCTCAGCAACCAT…
GSR_IOB_NIMR_417	scaffold00080-scaffold02716	KB664954	AGAP010961;AGAP010961;	TTTTTCATCAACCTGGTTTATTCCCACACTATTTCAAAACATCCTGGACAAGGTCGGCGTAAAGTCCTTCGTTGGAGTTCAGCGTGAAAGCGTTCTTGCGGTAGGTTAACCGTTCCGGCGTGGACGGCGATCGATCGATACGATAGTGGGAGAGCAGCTTCATGAGGGCTATCTTGATTTGCAACGTTCCGAAATGGGATCCGAGGCAGGTGCGTGGTCCAACGCCGAACGGCATGTACGTGCAGGGTTGTATTTGGTCCAGGTTCTCTTTCGCGAATCGTTCCGGATTGAACCGTTCCGGGTCGGGGAAATACTTCGGATCTCGATGGATTGCGTAGATGGGAATCAACACTGGCATGTGATTGGGGATAACGTAGTCGTGGAACGGTTCCAGCTTAT…
GSR_IOB_NIMR_418	scaffold00003-scaffold08651-scaffold19607	KB665165	AGAP003873;AGAP003873;AGAP012705;	ATGCGCTTCGGGTTCCAGGTTCCGCCTCATCCGTATCCGATCTCGTACTTTGCAGGTGGAGAAATTCTCTCCCAACGCTATTCAGGTCACGCCCTACTGGTGTCCGTCCTGCCGGACTGGGTGTCCATCGTGCTGTCCACGCCCGCCCAGCAACCGATCGAGGCGCGCGTGACCGGCCGTCTGCTGGACAACAAATGGCACACGCTCGAGTTCATCTACCAGGCCGGCACGCTGTACTGCGTGATCGACAAACAGTCGACCCCGATCGCGAACCAGAGCTACAACGCACCGCTGATACTCGATCAGGAGATCAAAAACGAGGCGGCCGTGCTGATACTGGGCAAGCAGTTCTCGGGCTGCCTGCTGCACGGTCCCGGGCTGGTGTTCAACTCGAGCGCC…
GSR_IOB_NIMR_419	scaffold02498-scaffold14669-scaffold00097	KB664544		CGAATGATAAGACCAAAGTGGCCAACCGGTGGTTTTGTTTTTCTTTTCTTTTTTCTTTTTGCAACAATCGCCAACTGCTCCAAGTGGATAGATTCGATCGATTCCGACACCAATCCCTGCCAAACAGTAGTACACACACACAGTTGGGGGACGGTTCACCCTCCGGGCTGCTGAATATCTTCCGGCTTTTCGGCCTTTAGTACGCGGTATTTAGGCACAGTTTAGTCCTCGACACCCACATTAAAAGGGTGTTCATCTTAAGGTCAGGAAGCGAGTGCAACAGGAAGTGCGTTATTGCAGGTTAAAAAAAATATATATAGAGCTGCATCCCGGAAACGCGCCCATATAAACATTCAATCGATACGCAATTATTCCAGCATATTCGACGGTTGATTACAT…
GSR_IOB_NIMR_420	scaffold02029-scaffold00177	KB664770	AGAP008149;AGAP008149;	TTGTGTTGAATGGGTGTGTGTTTTGTTTTCCCTTTTTACTTGCTTTCTCTTGATCTCTCTTGCTACCCGTTACCATTTGAATATATCCCTCACCGTCTTCCTTCTCTTTACAATTAACATGTCTTTTTGTTTTAGCTGACTTTTACATTATCTCTTATCTTATTATATTCAGTGTGTGTGTTTGTTTGGTGAAGTTTGTTTTTCTTCTTCTCTTACTTCTTCTTTTTTTCGTCCCCTGTCGGACTTTTAGTGTTTTGTAGTCTACcatcatcatcatcatcatcatcatcCCAACAGCACTTTAACAAACTAACTTTCTAACCCGCTTCCTAACTGCCTACTGTATACGCTTAGTAAAGTAAAATCGAAAAAGGGAAATGAGAAAAGATGATTGTTGGG…
GSR_IOB_NIMR_421	scaffold00076-scaffold09642-scaffold00847	KB665176	AGAP000009;AGAP000009;AGAP000009;	gtgtgtgcgtgcgtgcgtgcgtTTAACTCGCAGTTTCGTGCTGTGCCCGCGTATATGCGTACGTGAAAAGCAAAATTCGTCCTCCCTTCTCCCATCCAACCCCCCTCGTTGCCACCGCCAACGTGGCTCACTCCCTCGTCACGCATTCCTTCAGACGTGTAGGTGAGCGGTATACAACACCATCATCACTTATCAGTCTCTAGCTGGAGCTGGATACAAACAAAAGCGAAAGAGCAAGAGAGAGAGAGAGCGCGCGAGCGACCACGTATACGCCCGTCATCCGATTTCCGAAGGAACGGGGCCGAAGCGAGCGGGGCAAGCTTCCAGCTTGTGGAGAGCGCCTGAGGGCTGTCGGCATGCGCCACGATGGAGAAAGCGAGACGGCATAACGCATTGCTT…
GSR_IOB_NIMR_422	scaffold00113-scaffold00109	KB664419		CCTGCACCACCGCCTCCTCCACCTCTGGCGCGATGGCGGCGGGGGCGGGATGTGACGCGGGCAAGACGAAATCGACTTGCATCGAGAACAACGCGGAAGTGCATCATCCACCGCACATCACCATCAGTAGTGATAGTGAGCTCGACGATGACGATCCGAAGCACGCGCTGCGACAGCAGAACTCGGATCTTcaggagcaacagcagcagcagcagcagcagcagcaCCAACAAGAACACCACCATTTGcaccatcatcatcatcacctgcatcatcaccatcatcatcTGAGCGCGGAGTTTGGTGAACTGATCGAAGGCATCGGCGAGCTGCAGGCGGCAGGCGGGGCAGGTAGCGGTGGTGGAGCAGGAGTGGCAGCAGCGGGAGGCACGGCACCCA…
GSR_IOB_NIMR_423	scaffold00100-scaffold03498	KB664511	AGAP012183;AGAP012183;	ACAACTTGGAGATCGACCCTAAATCATAATCCATTTTTTTTGTTTTTTAGAATTAAAGACAGCCATTTATTTTGTTGCGATACTCATGTGCAAATACAATCACTTTAGCAATTACCAGCGTCGAAAAATAAATACAAAACCAAACGGGAAACAAAACCAAACCCGAGGAATTCAAAATTCTAACATCCCATTACCACTAAACACTCTCTTCCCTCTGCCCGGTATGGCCGATTAAAACCCATCGCCTAGTAGAAGAACAGTTCCGGGAAGTTGTTTTCGTAGATTGGCCGCTGACCGGCACCCACGTGCCTGCCCGCCTCGATCAGGGTCGGTCCGCTGAGGCCACCGTTGGCAGCGGCAAGCAGCGACCCGGCCTGTACGCTGCACGTGGCCGAGATT…
GSR_IOB_NIMR_424	scaffold00412-scaffold00034-scaffold03801	KB665043	AGAP012010;AGAP012010;AGAP012010;	AGATGGACGTGATTGTGAGTGCTGCTGCTGCTGCTGCTCCTGCTACTGCTGGTACCGGTGGCAATCCGCCGGCCACCGTGTCGCTGCCCGCCACTGCCCCGACCGCTTCCGCCGTGGCCGCGGCCATCGCGTCCCGTTCGTTGCGAGTGCGCACATCGAGCCAGAGCGGTGGCAAGCAGTACGGTGAGGCGCTGAGTGAAATCCAACTGTGCCCGAGCGTCATGTCCGAGGGGACGCGCAAGATGCTGCCCCCAACGACGGAAACCATCCAGACGAAACCATTTCCTATTCGGGGTGAACGTGCCAACTATGTGAACAGCCCGCATGTGATTGCGATGGTCGGACTGCCGGCCCGCGGTAAAACGTACATCTCAAAGAAACTGTCCCGCTACTTGAACT…
GSR_IOB_NIMR_425	scaffold01271-scaffold00020-scaffold01456-scaffold00020-scaffold01271-scaffold01456	KB664522		GTCGGTCGCGGCACAACGTCGTTTCTCTGCTGTCGTTCGTCGCAGTGATTTTTACAGTTTCTCACCATTGCTGGGAGTGTTTGCAAATACACAGTTCTAGTGAGTTTTGGCAAATATACGTGTTTGCGTGTATAGCTAAATGTCCAACTACCGCCGGGTGTTTGAAAGAAATTCAACGCGGAAAGTGAAAAAAGTGTAGTGAACTTGATTTTGCAAACGTGTTAGTAAACAACGGCGTAGATTTCTGTCACCCAGCATCGCTGCCGTCTGCGATGGGCAGTTTTTGTGCGTCGGAAAGTGAAGTTACCGACGGGATGGTATAAACGATGACACTTCACTGTCAATCAGAGCGTTTTCTAGCAATAACAAACGGTGTGCGATTTGGTTGAAGGAGAAAAG…
GSR_IOB_NIMR_426	scaffold00607-scaffold01515	KB664759		CCGCTTGTGAAACAACAATTGATGATTCTTTAACTGTATTTGTTGTTTCAGGTAAACTTCCAGCATAAGCTAAACTCGATTGAGTTATGCGTGACGCGACACTCACCGATGGCTTGAAGGTTGAGATACTATAGCGTTGATATATTTCAGCCCCGCTTAAAGCTGTGTTACGCAGATTCGAAATATAGTTACCACTGCTTCTGATGCTAGTAGGTGTAGCGTAATTGCTGATCGTCGATGAGTATCTATTGTTGTTCGAGGATCTGCGCTCGTTGTTTTTGATAGTATCAAAACAATTAGTATTGGGGTTGTTTGTATCAACAGAGGTTTTACGGCTGTCGGATGTAGCTTCTTGGTTTTTGGTAATAGTGCGGCTGTTGCTTAACTCACGTTCCTCTC…
GSR_IOB_NIMR_427	scaffold01271-scaffold00020-scaffold01456	KB664522		GCACAACGTCGTTTCTCTGCTGTCGTTCGTCGCAGTGATTTTTACAGTTTCTCACCATTGCTGGGAGTGTTTGCAAATACACAGTTCTATGTTTGCGTGTATAGCTAAATGTCCAACTACCGCCGGGTGTTTGAAAGAAATTCAACGCGGAAAGTGAAAAAAGTGTAGTGAACTTGATTTTGCAAACGTGTTAGTAAACAACGGCGTAGATTTCTGTCACCCAGCATCGCTGCCGTCTGCGATGGGCAGTTTTTGTGCGTCGGAAAGTGAAGTTACCGACGGGATGGTATAAACGATGACACTTCACTGTCAATCAGAGCGTTTTCTAGCAATAACAAACGGTGTGCGATTTGGTTGAAGGAGAAAAGTGGATCAAAGTTTTGTAAGCGGAGAAACAGA…
GSR_IOB_NIMR_428	scaffold02737-scaffold07364-scaffold00028-scaffold00017	KB664499	AGAP011959;AGAP011959;AGAP011959;	GCGACTCCACCATGGAAAAGCTAACACCCTCGTCCCAGGACAGCGAGGACGAGGAGAGCACACCGGTCGACGTGCTGCCGCTGTCCACCTCGACAAAATCACCTGCCAACGGTGGTAGCGGTGGTGCCATCCTGTACGATCGTCCAACGGCCGACCAGCTCCTGTCCCACTCGGCCCCCATATCACCCGCGCTCAACAACAACAATCATCACCACACCAACAACAGCAGTGGCAACGTGAAGTCCTCCGAAGGCTCCGGAACACCTCCGAACGGTGGTGGTGGTGGTGGCGGAGCGCCCGACACGGAGGGTGACGTTATCGGTCCGATCGAGCAGTGGGTCACGCAACCGGCCGCCCAAGGTGTCCTGTACAAGTGTCGGATAACGCGCGACCGGAAAG…
GSR_IOB_NIMR_429	scaffold02073-scaffold00105	KB664453	AGAP010283;AGAP010283;	CGCGCTAATGCTTGCGCGTGCATAGAGAGCTGAATCAGTCGCAGAACGAGTTTTTTCCTTGTCTTCGGAAATCCTACGAGCGAACAAGATTCATCTTTACGCCAAGGCAGGCACTCAATGGTTGGTTGTTTCGTCGCTGATCGTCATTGCAGCGATCATCGGCGCGCGAGGGTATTCGTCGGTTTCAGTCGTTCGGCGTCCGCGAAGCGGTCCGGAGCAGCAATTTCGAAAACGTGTGAAGCAGATAACCGATGTGTGTGGAACGCAAGTGTTAAAAAAGAGAGAAAATAGAAGCATAATAAGACGTACTAAAGCAAGAGCTATAGAGGATCGAGGTGATTAATGCAGCAGAAGGAAGTTTGACAAAACAAGCCTTAAAATGTTTCTAGCAACAATAGG…
GSR_IOB_NIMR_430	scaffold19409-scaffold00008	KB664655		TTGTGGATTTCGGGTGACATTAACAATTTTCGCTTTTGTCCTGTTTTTTTTACGTTTTCCTCTCGTTTCTTTGGGGCTCGATAAACACATATTGacacacgcacacacacacacacacacTCCCATTTTGGGGTACTATTTCTTTTTACCATGGTAACAGATATCCATTCTTCCGTCTTTAGTAACACCTAGCACTTTTCCAAttgtttttttcattttgtttttctcacacactttatctagttttaggtttttatttgcttttgttcttgctcttgcttgcttttgcttttctattctttttttatttccttttcccttttCCATTTCAAATGGGTTTCCC
GSR_IOB_NIMR_431	scaffold06532-scaffold08152	KB664718		AGGTGAGGGATCTTACTTATTACCGATATGTGCAGTGCCGTGGAATAACAAAAATTGCTTCAAAAAAGCTGTGTGTGTGGCTGATACTCCAGCATCTTCCCATGTGTGTAAACAACGCCAAGAGTATTACTGTTTTGTGATCATCATATTTCATTCGGATTGCACATTACCGGGCAGAAAAAGCTTCAAGCAACCAATTTTGTACAGCATCCGCACGCTGTATGAAGGTGTAAAACAAATTTTCATCTGTAAGATGCTCTTCA
GSR_IOB_NIMR_432	scaffold00004-scaffold00079	KB664821	AGAP000953	GTGGCTGTCATCGTTGGTGCTGCTCACCTGCAACTCTCTTTCCAGCATAGAGCTTCAATTGGTGAACACGCCTCGGAGCGCAATAGGCTCAAGATGGGGCGCCGTCCAGCAAGATGCTACCGTTACTGCAAGAACAAGCCGTACCCGAAGTCGCGCTTCTGTCGTGGTGTGCCGGACCCGAAGATCCGTATCTTCGATCTGGGCCGCAAGAAGGCGTCGGTGGAAGACTTTCCGCTCTGCGTTCATCTCGTGTCGGATGAGTACGAACAGCTAAGCTCGGAAGCGCTCGAGGCAGGCCGTATCTGCTGCAACAAGTACCTGGTGAAGTTCTGCGGCAAGGACCAGTTCCACATCCGCATGCGTCTGCACCCGTTTCACGTGATCCGCATCAACAAGATG…
GSR_IOB_NIMR_433	scaffold00865-scaffold02866	KB664852	AGAP007065;	CTTCGGCTTGGCAGCCCTTACCTATATGCTACAATTGACTTAACTTTAACTTAACGAACGTCCTCCAGAACATGTCGGCACATGCGGAACGGATTATGTTTAGCCGCTTGCCCTTGACCACTGCCCTAGTTCAAACGATTTTGCTTACGGTTGATGTATTTGCGCCCATCTTACTGATCGTAAACTTCCGTGGCACCGTTTTCACATCTTATGTTTGGTCAGACGCTCGTAACCCTCAGAGCTACAAACTGTTTTGACTTAAAGTTTTCATGTAAATCATCTACTGTGTAACGTATAGCAGTCTTCTTTCTTTACCGCCTTGCTAGGTAGGGGTCACAGAAACCTTTTGTATTGAGCTGTGACTCTATCTAACAGCTTAACCTATGACCTATCTAAGCC…
GSR_IOB_NIMR_434	scaffold00278-scaffold00046	KB664488	AGAP004619;AGAP004619;	TTTTTTGCTTGATTCTCTTTATTATTTTTAATAATTACTTACTTCTCCTTACTACGAAATAAGGGTTTGCTTTTTGTTTTGCTTTTCTCTGCACAGTTTTACTTTACTAGCGTGTGGTTGTGTGTCCGTCTGTGTGTGCGTGTGTGTGTGTTTGAGTTTTTTTACATCAATTAATAATAATCCTCATTTGCGTTATACGTTTTACTATCTTAATCTATACCATCCTGCCCCAACGGACGTTAGGAGGGGAGTTTTATATGTTACGAAGCACATGTAATTAGATTAACTGCACACGACACACCACACACTGCACACACACACACGCACAATAAACAATAGGGTTTGAAAAAGTTGGCTCCAATCGGTTTCACCTAGTCTGCTGCTGCTACTGATTGATTG…
GSR_IOB_NIMR_435	scaffold00286-scaffold02146-scaffold17419	KB665088	AGAP003434;AGAP003434	GGAGAAACGCGTGCGATGCTAATAATATGAATCCCGAACAAAAACTATAAAATGCGATGATCGTACAGTGAAGAGAAGGGTGATGAAAATGGTGCGTATATGTGAAGTTTCCAAGAAGCAGCTTCTCATCAAACTCGTGCGAGGTAAGTTTTTTTTTTCTCCAGATTCTATATTTAATGTAACATTTTTCCTTAATCGCACTGTTAAAATTCAATAAATAAATTACTACACTACTTGAACACCAAGAAACCACAAACGATTGGGAATTAGCACACACACACACACACTGTGACGCGACTCGTAGTAATCAAGCGGGGACAGCCGGACCAAGGCGTGATAAGCATCGCGAGAGGATGCTACCGTTTCGTTTTCCCACGTTTCGGTGGCAAATCTTCCTCA…
GSR_IOB_NIMR_436	scaffold01271-scaffold00020-scaffold01456	KB664522		GTCGGTCGCGGCACAACGTCGTTTCTCTGCTGTCGTTCGTCGCAGTGATTTTTACAGTTTCTCACCATTGCTGGGAGTGTTTGCAAATACACAGTTCTAGTGAGTTTTGGCAAATATACGGTGTGTTACTTCGCCGGGAAAAATTAATGTCCGCCACCACTCAACCGGGTGTTGCGCACGGGGAAATTGCATATTGTACAGTTACTGTCGATCGAAGAAGCGAATTAGAAGTGCGAAGAGGCGAAAGATTGTCGATAAGACGGAGATTTAAAACGTGAAAAGCAGTCATACGGCTTGGAAATTGAAGTGTCGGCTGAAGTGGAAGAATTTACGGTCAGCTCGTGCCAAAAAGAAGAAGCAAAAGGAAGGTTCACCGTTCTGCCGAAGCCTTGTGTGGTA…
GSR_IOB_NIMR_437	scaffold00654-scaffold00118	KB664502		tagcgatacacaagaccaacttttcagctttcctgggtgatctttacattaactaagcggaaatgaacgtgtctgaacgtgcttgcaatttgctttttcaatatgtgatttttgaactggtatctatcgtccatttttactttgaaatattacgtaaaatacgtataaactagtttaaatattgctttctgttgattttagtcatttaaacctatctgtgaggtttaaatttctaacattcacaactccttggatatcggcacgtgatttccatggtaacgccatgcgattccaccaaagtgtcgcgcattcgatggtgatggcacgtaaatcgcagcaaacacctcgtgagtcgaagcaGCTAGAAACAGGTGCAACATACATATCTCTATATACTGT…
GSR_IOB_NIMR_438	scaffold00859-scaffold09847-scaffold00076	KB665176		GGCAGCAGCAGCAGCATACGATCGCCTCCGTCCGCATGCAGGGGCTGTTGGATACGTAGGACACTAATAGTCAACCATCGTCCAAGCAACACCAGCGCCTCCTTAGCAAACGCAGAGGATGTACGAACAGTGAGACATCTAACCACTGCCTGCTGCACCAGTGGTTTCTGTGCTTCCGCCTGTGCGTGTGTGTCTCTGCACGCGCAAAAAGGACCCGGACAGTCAGTACCCTCGTGTAAACGCCCGTCGTCTGTACGCGAGATATATGCCCCGGCCAGAACACCCACAGCGTACGCACAGCGCAGTTTAAGAGACACTAGTTGTGACATCAACAAACCCCCTGCAAACACTAGCTGCTAGCGCTTTTGCCAAGTAACCGAGGCGGAATATCGCTACACT…
GSR_IOB_NIMR_439	scaffold05206-scaffold01384-scaffold00136	KB664510	AGAP006243;AGAP006243;AGAP006243;	TTACGAAGAGTACCTCCAATTTCTTGCGATGCTATGCAACGAGAAGCAGGTGGATTTGGAAGAGGTGAAAGAGCAGCTCACCAACTGTGGCCCACCCGGCATCAACTCATGACAGTTTGCGACGCACACGCTGATGTCATTTGTGAACGGGCCGTCAATGTTGCTTATCTTCAGCGAACAGTAGTAAACCGTCTTTGCGAAGAGCAGCAACGAGATGAGAAACAGGCTAATGTATGCCACAAATATACCACTGTAATCCCGCACGTAGGTGTAGGTGGCAAAGGTAACGCCGATACCGATAGCCAAAAATATAATTCCACCGAGGAAGTGTAGATTGCGTCGCTTGCGGCAAAAGTCGGCCCCGACCGAAGACACCTTACGACAGTGCGGACACCGAGC…
GSR_IOB_NIMR_440	scaffold00080-scaffold20045	KB664954	AGAP010933	CGTTGGTGGTCAATTTGCTGGAAAAAGCGCTGTAAATATGCCTGGATTCACCGTAAAGGACGTCGATCAAGACAAAGTGGTTGAGGGTGTTGCCCTTTTCCTCAAGAAGTCTGGAAAGCTAAAGGTTCCGGAATACGTGGACCTGATCAAGACGGCCAAGTTCAAGGAGCTGGCACCGACGGATCCGGACTGGTTCTACGTGCGTTGTGCCTCGATCCTGCGCCGCCTGTACCACAACAGCCCGGCCGGCATCGGCTCGATCTGCCGCATCTACGGTGGACGTCAGCGCAACGGTGTGCGCCCGTCGCACTTCTGCCGTGCCGATGGTAGCGCAACCCGCAAGGCCGTCCAGGCCCTGGAAGCCATCAAGATGATCGAAAGGCACGCCGACGGTGGCCG…
GSR_IOB_NIMR_441	scaffold00057-scaffold00006	KB664288	AGAP007831;AGAP007831;	CGATCGATCGTTCGCCACCCGACCTGCGGCTGGTTCGTCGCCTAGCGAAGCCACGATCAGTTGCAGTCTCTCCGTCGTGCCGTTCGGTCGCTATAGAGTGGTGCGCGTTCCTTCAGCAGACGTTCACGGCCATTGTGGGTGCTTGCAAAATCGGGCTGAGGGCTCGCAATCGAAACGAAACTGAACGACGCCGAATCGAAGTAACGCTCCGTGGTCAATGCTACACTCGCCGGGTGCGTGAGTATCGATGAATTTTAAACGACATTCCCACTGTCGATGCAGCTGATCGTGCAATTATGATCGTGGTGTGGTGGTTCGTGCCAACATTTCATGTGTGTGCGCCTGTGTGTAGGTGAAGTGTAAACAACGGTCCGTGTGTCCCGCGTGTGTGTGTGGAGG…
GSR_IOB_NIMR_442	scaffold03300-scaffold00663-scaffold03027-scaffold00024-scaffold19457	KB664433	AGAP006812;AGAP006812;AGAP006812;AGAP006812	TGGCCTGCCATTTCCTTCCCGAGCACAGCAGGACGATCCTGACACTTACGACACCGATCTCGGGATCACGCCCAGTAAAAGATCGCACGCCCCAttttgattatcttttttttttcttcttttatttgtcgttacttttgttttgtgttcttttgttgtttgttttgtcttAACAAATTATTGATTTGTTTCGCTCCGGACACACACGCGGCTGGTTGCGTCCAATTTTTGTCAACCGTTTCCCTACCGGAAAACCCGTCTCCTCAGCACACATTCTCACACGCTCACTCACACTTTTTTGTTGTTGCTGCTGCTGTTTCCTTTCACTACCTTTATCCGGCTTTTTTTCCTTTCAATGCTTTTGTTTTGCTTTAGTAATCGATATTAATATATATACTC…
GSR_IOB_NIMR_443	scaffold00880-scaffold00054	KB664622	AGAP012757;	GTCGTAGTTCACACGATAGTATCCCGTCTGCTGTTTGTTCACTACAAGCCACTCGATACCGCTCTCGATGGAAATGGTTGTGGTAGGCTCTGTCGGAGTCAACCAGAATGTTGGAGCCGTATCCTCGAAGGTGCTCGAGGAGGACCCACTGGAAGCATAGTTCAGCGGAATGTAGAAAAGCTTATTTTCCGGTGCAGCATCTACTTCGTTTGGCATCCAAAAGCGCTTCTGGGATGCTGTCAGTGTACGCTTGGTACGATCGACTGTCACCGTTACGACGGGATAGCCCGGTGCGTTAGCCCAGCTTTCGAAGATCGCTTCTACACTAGCCGGAAGATCGACTGTGCGGAACTTTTCAATGCTTGTGTAGAGGTATTCCGGTTTGGTGGTGAGATAGCT…
GSR_IOB_NIMR_444	scaffold00084-scaffold02271-scaffold02493	KB664988	AGAP011766;AGAP011766;	GATTGTAACACAGCCCCGCAATGGTGGACAACCGTGCCCACCGCGCATCGTCAAGCGCCGCAAATGTACCGGCCCACCGTGCAATTAACGGACACACACACAGCTGTTTGTTCGCCTGTTGAGTTGCAAATAAAGTGCGCACATCTGTGCTTCATTAGAATTCGGCAGCGTTTTCTTTCCCGTTCATTCAGCCGGCTCTTCGATGCAGCTCCGTCAGCATTATGATCACGCAATCGTTTCGTTTTTTTATTGCTTCACCTTCACTGCCGCCATTTAAACGCCAAAACCGCGTCGCGGGTCCACATAATTCATAAATTCTAGTAGCTTTCACTTCACAACTCTACCCACTATATATAAATATACCTCCTAAACAGTTCTGGCTCCTTCCTGGTATGCGCC…
GSR_IOB_NIMR_445	scaffold02073-scaffold00105	KB664453	AGAP010283;AGAP010283;	AGGCACTCAATGGTTGGTTGTTTCGTCGCTGATCGTCATTGCAGCGATCATCGGCGCGCGAGGGTATTCGTCGGTTTCAGTCGTTCGGCGTCCGCGAAGCGGTCCGGAGCAGCAATTTCGAAAACGTGTGAAGCAGATAACCGATGTGTGTGGAACGCAAGTGTTAAAAAAGAGAGAAAATAGAAGCATAATAAGACGTACTAAAGCAAGAGCTATAGAGGATCGAGGTGATTAATGCAGCAGAAGGAAGTTTGACAAAACAACAGTGCGGTGATCTTGTCGTACTATCAGTACTTTGATTGGTGACTGCAATAGGCGTTATATAAATGTTGTTATCGCAGCGTTGTGAGATGCTTTTAGTGAGTGAGTGAAATTGTGTCGTTGCTTGTGTTGGAATAG…
GSR_IOB_NIMR_446	scaffold00080-scaffold00341-scaffold08019-scaffold08953	KB664954	AGAP010893;AGAP010893;AGAP010893;AGAP010893;	GCAAAAATAACCGGACAAACAACTAATTTTTTTTAACGGATTCAATCTTCGTTATGCCATTTTGGGGTTCAGGATACCAAATTTAAGGTTTACGGTGGCAATGTGAAATATGGTAAGCGCTTTACCATGACTAATTGGTTATGCAAACCCTGTACCGTGTTGAATAAATTGTTTGCTTCACTACTAGGAACATAAAATTAGAAGAAAAAAAGAACTGCAAAAACAAATTGAAATATGTAAATTATACGAAATATCTAGAACGATACTATAAACAAAGCTAAAGAGAAGGAGAGAAAAAGAGTTAGTGAATTAAAAATAAATAAATGAAAAAACCGATAAAAGGTAGAGAAACACATGTACAAAAGATTAAAACTGAACAGACAACAGTAATGGAACAAC…
GSR_IOB_NIMR_447	scaffold00127-scaffold04309	KB664442	AGAP004805;AGAP004805;	TCGTAAGATCGCGTGGTGTGACGCACTGTCGCTCCGTTCAGATTTTATGTGCTGTGATGTTTGGCGTGTTATCTGGTGTGGCGCTCGCTCCAACGCAGCTCACAAAACCGAGTTGGTACCGTAAGAAAGAACTCTAAATGTTGTGCATGCGTCGTTAATGTTCGGTGGAATCAACAACAGTGAAGTGCTCTGTGTGTGTACCGTTTGTGTTGAGATGTGATTTAAGGAAGGCAGGAAATGTGCCGTCTCGGTGAAATAAAAAACGGATGTGAAGCGAAATGGCGAGCAAGGGCCACGAAAATGTTTGAAGAATCCGGTGTGTAAGCAAGGCAAATAATAAAATGCACAACATAAAAGCATTATACAGTGTTTGGTGAAGAAAAGATGGCAGAAGTGATT…
GSR_IOB_NIMR_448	scaffold11454-scaffold00285-scaffold05042-scaffold09244-scaffold00153-scaffold00167	KB664806		AACCAACATGCTTATCAACCTGTTACTCTTCAATTGCCCAACGTTCATGATGGTTCCACGTATGAGCTGGATTATAATCATCTCACTCAAAATGCTGGAGAAAATGAAAATACTCTAACAACAGAATACGGTGATGGAGCAGATGACAATGATGATCTTGATGAAAGCATTGACCACGTTGTCGATTATCTAATTGAAAGTTCTGATGAAGAGCTAGAAGATGAGCTATCTACAAAAGAATATTCGGTACAAGATGCCTTACGTCGCTGGGCCATATCCAAAAAATAAACGTACGAGTCGATCGAGGAAGTAATGGAGATAATACGGAAAGTAAGTGACTGCAAGCTACCGAAAGATGCAAGAACCTTGCTGAAGATCAGCCGCAACCCTTCTGCGGAG…
GSR_IOB_NIMR_449	scaffold03132-scaffold00295	KB664510		ctttgggtcttcgagacctcaAGAATAATGTAAACAAACTTTGACGTCGACTTTGATGTCGACCAAACCTCACCTTCTCACATACATAAACCTTGGGAGTGAGCGAGAAGCGCATCGAACAGTGCGAGCGAGAGAGCACGAAGCAAACGTGCCCAAACGTCAAACAAATTCAAAGTGTTTCCAAAAATATGAACCGCTTTCGCGTCCTGGCTCGTTTACCTGCGTACACGATCTGTACCCGTGCTGTGCGTAGCCACATTTAATTGGTTTGTGTTTTCTGAGATTTTTACCCGTTTGATTACGATCACGCTTGCTTTTGTGGCAAGCGGCTTACCCAAGTATCGCGTTCGCACTACCCGCTAAATCAGCATGCATAAAGTCACAACGCCAACGAGAAGC…
GSR_IOB_NIMR_450	scaffold00613-scaffold00001	KB664600	AGAP003146;	AAATAATTAATGATCTTCAGCTTGCATGCCACAGTAAGTTACAATCGCTCATCGCTGCAGTTTTCCTTTCAGACACTGTATTTTGTCGTGTCGGTGAGTGAACAAATATGCCAACCCCCAAACCCCCCCCCCCCCCCCCCAAAAAAATAGCACTCTCGCGCGTATTTACCTATCTCTCGTTCTGTCGTCGCACTTGAAACAATTTTTATTTTGTGCGCGCGCATAATTTTTTTTTCGTCCACATGCAATCCTGTCCATCGCTTGAACAGGAAGGTTCGCTACACTCTCACAAAATCAGGAGAAGACTTGGTGCGTGGCACTCAATCCAAACGGTCCATACAAAAGCGGCACGACACTCACGCTGTACTCTGCTGCTCGATACAGTGTGTTCCTGTTTCG…
GSR_IOB_NIMR_451	scaffold15407-scaffold00143	KB664854		TCTCACTAAACCCTTTTTTTCTCTTTTTCTTTGTGTTTTAATGCATTCAACTATCATTTCATGCACTCACTGCGATGACGATGCGTTGCGTTCTTGAGCACATTTGGACACAAACCGCTTGTGATACGCGTTGAAGAAAGGTAAACCAACAAATCTTAGCAACTATTAGTACCATCTCACACCCCACTACATACTTTGTTTTTCCTTTTTTCTTCTCTTTTAATGCTCTAAACTATCATCTTACCACATATGTGTGTATCGATGAGTGTTTGCGGAAGATCAATCTCACACCAGACCAAGGTGTCTTTAGTCTTGAACAAAAAGGCTGCGCGATATAATTGTACATCGTAATCGACTGGCCTTCCTGCAAGCTCTTTGAATACCCCTGAATGCAACCGA…
GSR_IOB_NIMR_452	scaffold00247-scaffold00241	KB664433	AGAP006812;	TCTGTGCTGCGCGAAGGTACCGTTCCAAGTGGTGGACGTTTTGCCCGGCCGAAGCGGAAACGATGAGGACGCCGTGATGTAGCCACGTGGATCATCCATGAGCACACTGTAATCGCGCGGATTCGCAGCTCCCGCCGGAGCCACCGACGATGAAGTTGCTGGAGACGGTTCGGGCGTAACATTCGCGCCAACGGCCAACGATGCCTCATCGTTCGGTCCGGGTTCGCCGAGCAAAGTCGGTACAGCTGCATGGTCCGGTCCGTACTGGGAGCTGTTCGTACCGACCGTCGGCAGATGACTCACGACCCCATCCAGCACGGCCTGGCTAGTGTTGAACTCCTTGAACCGTCGGTAGAACTCAACGTCCACCGCGTCCACGTGCACGTGCGAGCGCTTGCG…
GSR_IOB_NIMR_453	scaffold00058-scaffold19392	KB665188		CAGTGGATGGGACGgactgtggaagagtaagcttcggaagcaaaatatcagatgacgaagacgtgttctgttacctcgtaactgtctctctctctgtgacgacctgttcatcgtaactttgtgaggcgtctttttcaggggattcgtgtttactttgagctccagaaactccagtgatcgagaagactcgcacactgatacgtctggtagttctcgacggactggagtcttgactgacagaagacgccaatgcaGAAGAAGTAGACCGGCTGGTACTAAAGAAACTGAGCAGTTTGGTGGTGCAGAAATTCTGAATGAGCGTAATGTGTCT
GSR_IOB_NIMR_454	scaffold00024-scaffold11370-scaffold07635	KB664533		CAATTCACGACTTTAATTTATTCAAGTAATTCCTTTAACGCATCCTCAATTCCCAGCTCAATCACACCCCGCTCTCTATTGCTTTTCACTGGCGCCGCAAACAATAAAGTGCTATTTTTTTGTTTTGTTTTTCTTTGATTATTATTGCTAATCGGTTTTTGTTTTTCTTTTCTTCAAATCCATCGCAAACTATATTTTTTATATATATTGATTCCATATAACTATTATCATTATTCAACCTACTACTTCCGGATTTTGTGTGTGTGTCTAATCCATCGTTTTTTACCTATCGATTTTTTCTAATGCTGCGTCTTTCCCTCCCACTGGCAGCAGTGGGGAAGAAAAGTCGGCGACACAAGTCGGAAGAAAATAACGTTAAAATGGGGCTTTTCCGCTGGT…
GSR_IOB_NIMR_455	scaffold12383-scaffold00043-scaffold01593-scaffold08939	KB664766		CAGGGTTTGTCTCGTTACTTTACGATATGAACGGCATATATTATACCGTCATTATTGTTTTTACATTTCGTTTGAGTATTTTCATTCAATCCCGAAGTGTTTTTAGTTCTTCAATTTCTTCCACATGGTTTTCGACATGATTTTATTGTCAAGACGGTAGGTTTTGTCGAAAAAATGTATATAACAAATTGAAACACTTTGTACAAAATATGCCGTTCGCATCGCAAAGTGAATAGGCGAGCCCTGTATCTTTGATCGCTGATTTTTGGTCTGGCTGCTCATGGAGAAGGGGTTTCAAGTCGTGCGATTTGTTTTGAGCAATTTGTGCAGGCAATGATTTCGTCAATAAAAAAGGATGCGGATCTTTCGATCGTCATAGGGATCGGCTCAGGATATGCC…
GSR_IOB_NIMR_456	scaffold00029-scaffold01226	KB664412	AGAP028093;AGAP028093;	CAGTAGTGATTCCATTTTGCAATCCTTTTGAAATCTGCACCACGTTACACGGTGTGGTGCAGCAGGAGCCCCAAATCTTCCCAAATCGGTAAAATACTGCGTGGTTCGTCGTCGTCGAGCACACGAACACACTCTGCAAGTGCAATCTTTCTGCGCGTGAAACAGTCAACACGTTATACAAAAGGCTACCCTTTCTGCCATTCATCGTCTGGCCCATCCAGAGAACATTGCGTGCGTAGCCGCCTCTTCTGCCCCCCCGAGTGTTCCTCCAGCATAGCCAGTGCGGAATAACCGTGAAAGGTAAACACGACGTGGTGGTTGGTGTATAGTTAAGGAGGAACTTAGTGAAGGAAACAAAACTGTTTTATTGAACAGGCAAAACACAAGCAGAGCACTCAA…
GSR_IOB_NIMR_457	scaffold00111-scaffold00053	KB665043		TTCCGCGTTGGTTTCCAATGCGATCACGAATGGTTTTCCACTGCACTTTAACACTCACAATACACAATACACAATACGGCAAAAGGATCCAGAAGCCTCCAAACGATTGTATTTAGCTTCGAATTCACGCTCTGCCTCTTCCAGAAAACGACGGCGCTTTCGGTAATGAGTTGATCTTGACGACATTTTAATATATATCCGCAGAAATATTGCTTTTCAAAACCGCGCATGCGCGTTAAATCACCGTGTACATACACGACTGGTTGAATCGAAAACGGCTGTCGATGATACAGAAGAGCAGAACAGAAGACCAAAGCCAATACGAGGAAAAGAGAACGCACTATTGCGAATACACATTTGTGGGCCAAGTAGGGTGAGGAGTTCAGGGCCTAGCCTCAA…
GSR_IOB_NIMR_458	scaffold00030-scaffold00875	KB664500	AGAP010691;	AGTTCATCCAATTTTCGAGTTCCACGGAGGCCGCCTGGTCCCGCTTAGTAGCATCTTCATCTGCAAATGGCAAGTGCATTACCGTCTTCCACCATCTTGGTAGGACTCTTGTCAGTGGGGCGTTCTAGATTGCAGAGGTCTTGTGCTTCCGAGGCGAGTTCCATCACGATGGTCGTGACCTCCGGCAGCTAATAACTGTATCTTGATACTCAATCCAGTTCTAATGGCCTATTATTTAATGACAGCATGACAGAAAACAGGATTTCGGAAATTCAATATTCACTCCGGTCCGGCCACAACAAAGTTCGTTCGTTTCTTCTGTTTTCTCTTTTTTATTCTTATATTTTTCACATTTTTTGTTTTCTTCATTGAATTACTTCTCCGTTTCGCTTTCTCTCT…
GSR_IOB_NIMR_459	scaffold01777-scaffold00071	KB664416		ACCATGACCTGAACTGATCACTGCGGAGAGCCGTTATGCTGATCGTAGGGGAAGCGAGCGGGGACAAATTCGGAACTTGGTTGAAGGTTCGGGAAAAACAAAAATAAAGCCGGAAATCCTTTGGACGGTGGTGTGGCAAATCAATTTTTGAAATTCTTCAGCAGCAGCTAATCTATCGCCAGATCCGTCGAAACATTCCCGAGGCAGATCTAGGATGGTGCAAATTATTCACGCGAAGAAAACTTGAGACGTTAATTTTCAACACTTGTCGTTATCATTGGTCGCACATGCCCGCAGTGACACACACAAACACTTCACTTGTTATTTTCTATTGCTTCTCTTTATACTTCGGATTCGAATCGATTGAATTTTTACTTCACTTTTCCAACAATCGCACAC…
GSR_IOB_NIMR_460	scaffold00028-scaffold03851	KB664434	AGAP011872;	tgatcgacgcgacgacgggaaagctgaatgtagctggaatcgggatcgtcccaaagtgttgtgttgtgcttcacggagcgaagtttcgtggagaggtctaggatgtgccaggtagtgttctcgggcgtgaaagagtgctgtatggtccggctggacggaaccgaccttcgttggccagtcgatcgatcggccttttcgtttccgtcaattccgcaaagacccgggGGCCGCATTAGAAAACAATTGCAGGTAATGAGGCCGTGTTttgggctaaagagatggatgtgtggttaggatgttgtcgtggtaggcatggatctcacagccaactgactcccgatacgtaacggaaccgtctgtgaagatgtggtgatggcgtctggtatttggttcggatca…
GSR_IOB_NIMR_461	scaffold00493-scaffold00006	KB664288		GCAATATGAGAAATTCAGTTTGTTTTATTCCATTTGCGATACATTACACCATTTCTGCTCCAAGCATATTCATATGTAGTCATTGTTTGAGGTTGTTTAACGTGCTAGTGACTGACTGATAGCAGCAGTAATTACAATAACTGCTTTAGCAGCATAACGGTTACAAATACGCTCTACAAAATCTCTATCTGACTCAATAGTGTGGGTCCACTTAGTTATAGCCCTTCTACATCTAACTCTCACAATGCTAGTAAATGTTTTCGTCCGTTCCTTTTCGCTGAGGAGTATATTGACGATTTAGATACAAAGTTTGTCCATTATTCAAATACGACAGTACGATACGGGTGATGAAACGGGTTTAGTAATTGGTGCATATACGACCATTTGTACATTTCAAAA…
GSR_IOB_NIMR_462	scaffold00010-scaffold01295	KB664477		TGAGACCGCCGATGAACATTTTTCCTGGATCGTTCGGCACCTCAGCCTGATTGTTGCCCGGGTGCACACCGAGGTCCTGGTTCTGGTGCTCCATACTGTTGCTCGACGGTTCGGCTTCGCGCTGTAATCTACGAATTCCGCTGACACTAGCGTTAAAGCTGGCCTGCTCGAAGTTACCGGTAGCCGGGTTGCGTATTAATTCCTGACTGGCAGCCAACAAACGGACTGACCCAAAACGGAGGCTTTAACTTGAACTTTCGCTTCCTGAATGCTCTTTTTATATATTTCACACCTTCACGCTTCCTTCTAGACTAGCAGAAGCGGGTAGTACACAATTTATTTTCTTCCCTTTCCTGAACACACAAGCTTATTATTATTTCCTTTTGCAAGGGATAATTT…
GSR_IOB_NIMR_463	scaffold00040-scaffold02078-scaffold13177	KB664699		GCTTACCCTAGCAACATTCCGATACCAACCGTAGCCGTAGCCTTCAGGGACATTTTTATACGCAAAAGGAAAATGAGTAGCTCTGAGGAGGTATCATGGATTTCCTGGTTTTGCGGACTGCGCGGTAATGAATTCTTCTGTGAGGTGGACGAAGATTACATACAGGACAAATTTAACCTGACCGGACTGAACGAACAGGTACCGAACTATCGTCATGCGTTGGACATGATTCTGGACCTGGAGCCGGAGGATGAAATTGACGATAATCCCAACCAGTCGGATCTGATCGAACAAGCAGCGGAGATGCTTTACGGTTTGATACACGCTAGATACATTCTTACCAACCGTGGCATAGCTCAAATGATAGAAAAATATCAAAGTGGTGACTTTGGCCACTGC…
GSR_IOB_NIMR_464	scaffold00079-scaffold12641-scaffold00674-scaffold14361	KB665132	AGAP002399;AGAP002399;AGAP002399;AGAP002399;	TTTTAGCGCAGACGCATCCCGATCCAGCTGATGTTGTCACCCATCATCCTGGTACGATCGTGTGCTGATGCCGTCTCGCTTACGCCTCACGTTCGCTTGGCTGGCGGCCAGCGCACGCTCAGCGCAACACGAACGGCGCAACCAGGGACTACTTCATCCTTCAACGACTGGGGACGAGTCAGAACCATTTCGACCAGCAGCGCAGCAAGTGCAAGCATCGCAAGCAGGCGGCACGTAGTGAACGAGTGAGCCAGTAACTTTCTCGAACCAGTACCAGGTTACCAGTAGCACATCCGAACATCGTTCAGTGTCAGTAAGCGAGCCACCATGGTTTACGAAAGCGACTTCTACAGCACCCGCCGGGTGGGCTCGAGCTATACTCGCCCCACGATTTCCTCG…
GSR_IOB_NIMR_465	scaffold02482-scaffold00007	KB664921	AGAP008985;AGAP008985;	CGATGGAAACCAATGGGCCGGAGGAGGCGGCGGACGATCACGACGCCGACGAGGTGGAATTTGTGCCGGTCAACATGCAAATGTTGGCGGAGGAAAAGAAAAATAGCGGCAACGATGAGTACAAATCGAAACGCTACGAAGCTGCCCTCCGGCTCTACTCGGAAGCGATCCACCTGAGCCCCAAAACAGCCGCGTACTATGGCAACCGATCCGCCTGCTACATGATGCTCGGTGACTATCGGGCCGCGCTGAACGATGCGATTGAGGCCATTAGAATGGACAAAGAGTACGAGAAGGGCTACATCCGGAAGGCCAAATGTTGCCTGTTGCTCGGTGACGTGTACGGAACGGAGCAAGCGATCCAGATGTATCGCACGCTGGATTCATCAAACACGGCAC…
GSR_IOB_NIMR_466	scaffold00103-scaffold00338-scaffold06914-scaffold03380	KB664367	AGAP009061;AGAP009061;AGAP009061;AGAP009061;	TGGGAAGTTGTGTTTTATTGTATATACAAGGTTCATCGTAATAATGATCCGAATTGGGACGGGGTAAAGGCAATAACGGTTGAAATCCGTCGTTTGGCACTTGCTGCAATCGGTTCTGCGGACGCAGCGGTCCGATTTCATCGATTTCGGTAGTTAAGAGACTGCTACCGTGCTGGAAATGCAACATGCTCTGGTGAGGACGATTATGATCGTTGGATGAATTTCGTTGATGAATTTCCGTCAGCGGGTACTCGTAATCGATTGGTCCCGTGTTTTGTGTCAGATCGGGATTGCACTGGGTCATCTTTTTACTTTCGTACGTGAAATACTGCGTTGGAAGGTCTGAACGGGCCAAAATATAGGTGGGAATCGTTTTCTTTCTCCTGACGAACTTGAAGA…
GSR_IOB_NIMR_467	scaffold04880-scaffold00156-scaffold02030	KB664576	AGAP013111;	TTGTGGCCATTCCGAGGGGTTTTCTTTGAAATCCTTCGTCTTCCCATCACGAAGATATTTGGAGGAAGAAAGAAAAACTCGCTGTCCCTCTGGGGAGTGGTCACAGTTTGAGCAGCGCAAGCAAGCAAGCAAGTTCCGCATCCGGAAACCGCTCGTCCCCTGGATGCCCTCCGTGGTCGAATATGCAAACATACCTTAATTAGAAAATATCATAAACCGTACCGCAAACGACGCATAAGCTCAGGCAACCGACCAAGCTACCTTACCTTACCAGTTTGGAAAAAGGGCTTTCTTCTTTCTCCTTTTTCGGTGCTGACTGGTGCTGGTGGTGAAAAGTAAACACTACCATAAAACATTAATTTTTTATGAGCTATCCACCGGTGTACGCGTGACTGGTGG…
GSR_IOB_NIMR_468	scaffold00025-scaffold01676	KB665343		NNAGTATTTGTTTCCTGCATTCTGTCTCGCTTAAGGTGTGTTTCGATATTGTTGTTTTTTGTTTCCACAATCTTCCCTAATCGATTATCAGTTTTGTCCACATCAACGTCCTTTCCCCCACTCTATATCgtatgtgcgtgtgtgtgtgtgtgtgtTGGTGTGCTGATTGTAATGGAAAAATTTAAACGTACCTCTTATCTTTCTCTTCTACGATTCTTTGCGATGAGTTCGTTAATTCATTTCTTACAAATCGGGGGGACCGCTGCATTACTACCTCTTAAAGCATTCAATTTTGTCTTGTATGTTGTTTCCTTTCATTTGCTCACCACACTACGCACACACACACACACCACTATCATATGGTGTAATAATATCGCGCCAATACTTTTAATCGGGAAT…
GSR_IOB_NIMR_469	scaffold00132-scaffold15630	KB664444	AGAP012516;	CATTAAGTTTTTTTTACATGAGTACATAAGTCATCGTTCTTTTCGATTCCGTATTTAAAAACTTACCAAGCCTTACAGCTGTACAATTTAGCAATCGGTCAATAATTAGGTTGTTTTGTGGGTTTTGTTGTTGCTTACATGGCTAGGATTATGGAATATTATGCTGAATACTTGTTTTGTACATAGGATATCTGTGGAAACTCGTTCCGCCAGTCAACAGTCAAGCGTCGTCCTATCACACATTTACAGAAGCTTGCGAGCTTGTTTAGCCTCGATTGCTTCCGAGGCAGTGATGTAGTCTTTCAATAACGTTGTCACGTACGCGTTACCGATTAGGACAACAGGAGCTTCCACGGCCAGATAAAGTAGCAGCGCACTGGTCACTGTTAGCAGCAAAGA…
GSR_IOB_NIMR_470	scaffold02493-scaffold02271-scaffold00084	KB664988	AGAP011765;AGAP011765	ATCCGAAGCTCGATGGAACGGAAGGGACACCAGCCGAATGCAGGCTGATTGCGGCTCAGTCGCTAATCAGCAGCCCTAGCGCTCGCAGTGAAGATCGCGGGACCCCGTCGTACGTATTCCAGTGCTCCGGGTGGTAATCAGTGCAGTAATCAGTGTAAAACAAAACACACTCCACAGTACCGTACGGTGTGGTGGGGAAGCAAATCGACGAGAACTGATAAGCGCCGGAAAGGCGAAAGTCTGTCTCGGAGGAGGAAGCATGGTTCGCTCCGGACGGGGACAACGATCGTCCCTACTGTCGATCGCTTCCGTACTGCTGCTAGCGTTGCTTCCACTAGCGCTGGTGAATGTGGCCGAAAGTTGCAGCAAAACTCCGATTGTCGATGGAAGACCCATCGG…
GSR_IOB_NIMR_471	scaffold01901-scaffold00001-scaffold01401	KB664572	AGAP002914;AGAP002914;AGAP002914;	CACACACACAAAAGCAGCCGGAGGTGAGAAAGCACCCAATACACTGGAAAACACAGTGCATGACGAAAGAAATGTTCAACTTGTTTTTGTAAAAAAAAGAGAACGAATAAAATGGAACACAAAACCCAATCAAAACTCTCTTGCTTGCCTCGTATTATCTGTTTCTTTATCTGCGGAAAATTGGAAAGAACACAAGGAAAATCCACGCTCAAAGGTAATGTATAGTAAAATTTTAGCTTTTTATTAGCACAGAAAACCCCAATGTCGGTGGAAAATCCCCTTTAACGATCTACCGCATCGATTCGGCTAGCTCGAACGTTCGGGCCCCGTTGCCCGGTTGGGCCAGATAAAACTGGGCCCGATATTTGCCACCCGTTTTGCGCGAATAGATCGTGTCCA…
GSR_IOB_NIMR_472	scaffold00775-scaffold00076-scaffold19954	KB665176	AGAP000562;AGAP000562;AGAP000562;	GCAACACCACCAGCAGACACATCAACTCGTGACATTCCGCGCCCGTGTCCAGAGTCTCGCTTTTTAGGACTCTGCACTAGGAACCAGCAACGCCACCCAGCGTATCAGTTCTTTCAACCCATTTTCTCTTCCGGGCTACGTGTAAACTACTATCAACCCAATCAAAATGCCGAAATCAATGAACGTGCGCGTCACGACGATGGACGCGGAGCTGGAGTTCGCGATCCAGCAAGGCACCACAGGCAAGCAGCTGTTCGACCAGGTCGTGAAGACGATCGGCCTACGAGAGGTCTGGTTCTTTGGACTACAGTACACAGACTCGAAGGGCGATAACACGTGGATTAAGCTGTACAAAAAGGTGATGAGCCAGGATGTGCAGAAAGGCGACCCGTTGCTGTT…
GSR_IOB_NIMR_473	scaffold00005-scaffold19510-scaffold22168-scaffold02108-scaffold01780	KB664289		GGTGCTATCAAATGTGTGTGACGAATGTGGCCAATTCTTTCGCTCGTATCTCGTTGGTGAAACATGAAGCGGCGCTACGTGATGTGGTGAAAGTGCTTTCTCCCAATGGGCGGTAAACTGGCCCACGGTGCGATCTCGACCAGCGGCTTCTGCTAAGTCCGGGTGCACACGTGCATTTCGCCTGGGTGCGTGCGAGTGTGTGTGTGTGTGAGTGTAGCGTAAGAGTGTCCAGTGTTTAGACAACTTCTGCAAGTGCCACAGAATGGGATGCGGACAGAGCAAGATCCATCTCTACCCGAGGAAAAACAAGAGTAAATCGAACGGAAAGAAAAGCGGCCATATAGAGGACGCCGAAGCGGACGAAGAGGACGGACAGAATGGGCGGAGTGACGACCGGAG…
GSR_IOB_NIMR_474	scaffold02860-scaffold19265-scaffold00355	KB664875		TCAGCCGAGCTTGTGGCGAAATTATGGCGGAGGTCACCCCGTACGTTGGCCACACCGGTAAACCGACGTATTGGTGGACGCCACAAATCGGTCAACTGCGCGAAGAGTGCCGCCAACTCTGGGAACGACGACAATCGCTCTCGGCTGCTGACGCTGAGGCTCGATCTGCAATGTCGGTGGATTTGCAGGAGGCACGCCATCGCCTGACAGCGGCGATACGCACAAGCAAGCGGGATCGGTACGCAGAATACATCCAGCATCTCGAGGAGGACGAGACAGGCCGGTGGCAGGGGGAGTTGCTGCAACGGCTCGGAGGGAGTCGCGTTGCACCAGAACGCGATCCGGCCAACCTGCAGCACATTGTGGATGTGCT
GSR_IOB_NIMR_475	scaffold00320-scaffold00018-scaffold08622-scaffold00021-scaffold00184-scaffold07774-scaffold00031-scaffold00004-scaffold00060	KB665354	AGAP011566;AGAP011566;AGAP011566;AGAP011566;AGAP011566;AGAP011566;AGAP011566;AGAP011566;AGAP011566;	gttgtgcctgctgctgagcctgctgctgctgtaccgctaccgcttgctgctgggcctgctgttgttgcagctgatgctgttgctgggcagcggctgcagccgccgcttgctgttgctgagcggcaacggctgcctgttgctgctgctgctgttgctgcACCATCGATTCCTGGTTGGTGGCTTGAATCACAACCAGCTGCTGCTGACCGGCGGACGCTTGCTGCTGCTGCTGCTGACCAGCCTGACCGGCGGCACCCGCACCACCCGCGACCCCACCGCCAGTGCGTTGATTCTGCTCCAGATGCTGACGCTGGTGCAGCATCAGGTGGTTCTTCTGGAAGAAGGCCTTACCGCACTCGCACACGTGCGTCCGTACGGTACAGCCCCCGTTCGGGTGAC…
GSR_IOB_NIMR_476	scaffold00028-scaffold03851	KB664434	AGAP011872;AGAP011872;	tgatcgacgcgacgacgggaaagctgaatgtagctggaatcgggatcgtcccaaagtgttgtgttgtgcttcacggagcgaagtttcgtggagaggtctaggatgtgccaggtagtgttctcgggcgtgaaagagtgctgtatggtccggctggacggaaccgaccttcgttggccagtcgatcgatcggccttttcgtttccgtcaattccgcaaagacccgggGGCCGCATTAGAAAACAATTGCAGGTAATGAGGCCGTGTTttgggctaaagagatggatgtgtggttaggatgttgtcgtggtaggcatggatctcacagccaactgactcccgatacgtaacggaaccgtctgtgaagatgtggtgatggcgtctggtatttggttcggatca…
GSR_IOB_NIMR_477	scaffold00009-scaffold01124	KB664451	AGAP012220;	CAACAATCGTACGCCAGGCATCAACCGTTGTGCACCCGCAGTATCCAGCATTCAGCTCCCACAGAGGTACAGGAACTTGGTACAAATTACAAACAGCCAGAACAGTGAAAGCGTGTTAAAGATCGTTCGGAAAATCGGATCGCTTGATTTGTGTTTCGAGCTTGTGCGTTGAAGTGCGATCGATCTCGACCCCAGGTTTCGACACACGGTTCTTTAACGAACGAAAGTGATCCCGCACCACGACAGCAACATGGTGAAGCTTCATCTCGTCTGTGCCGTACTGCTGTTCGCCTTTCTCGGCTGGGCTCACGGGCTGCCGATGAAGGAGCAGGAGCTGGAGGAGGTGCTGACCAAGCTGCAGGAGCTGAAGCGGCTGAACGATGAGTACCTTTACTACAA…
GSR_IOB_NIMR_478	scaffold00029-scaffold01226	KB664412	AGAP028093;AGAP028093;	AAACGGTAGAGATAGTGCGTTATTTGTTGCTACGTGCAGCAGCAGTCAATTACAGCCGACAAGGTGGTATAGGTAAACACGACGTGGTGGTTGGTGTATAGTTAAGGAGGAACTTAGTGAAGGAAACAAAACTGTTTTATTGAACAGGCAAAACACAAGCAGAGCACTCAAATATCCACCAACGGGAGGAACCTCATACTTAAGCAAACGCTACATACTACTGCCCCGGCTGTAGTGTGCCGTACTGAAGAGACTGCCCGCTGATAGGTGTTCCTTGAACCGTCCAGAATTATCACAGCCACTAGCCCAAACAAAACAAAAACTGCCCTTCCAAAGCTCTTCCCTCTAGTTAGGCCAAAACAAGTGCACGAACCACCACTACCAGGGCCCGTATAGCAG…
GSR_IOB_NIMR_479	scaffold00410-scaffold00032	KB664312	AGAP011122	TTTGCGATTGTACACATTATGCTCGCATTTATTAAATAGTATACTTATATATTTGTTTCATTCATTCTCTCCCGTTTGTGTGTGATTTTTTTTTTTGTCTTTTTCCGCCCACATGAGTTTTTTTTTATAAATTCTCTATCAGGATCAACACGAATTTCATTCCACATCCCATTCCCACCCGACCGCAACTTGATCGATCTTACACTTGCTTGTTTTGCGTACCTTATCGTGTACCGTTTAAACCAAACCTTGCACAGAACCTTCCACGTATTTCTAACTCGCTCTCCCTATCATGCTAAGCCCTTTCATTCCTATTCACACACCCTTCGCTTTGCACGGTTTAGCCACGTCAAAGGGAATTGTTGGAAAGCAAAAAGGAATCCTCGCCAAACAGAAATA…
GSR_IOB_NIMR_480	scaffold00032-scaffold02294	KB664480	;	CTGGTTGATAAACGTACGAAGTCCACAAAACTATAATCGTGAATAATACAGGTTCCTAGTGCGAAAAGCTGAAATTTGCACCAAAGAAACAGAGTGTCAGTGTGTGTGTGCGTGTACTTGTTCGTGGTGTGATCTCTCGTTGCGTTCGTAGTCAGCAGGGAAAATCATTTCAGTGTGCGCTCGTGTGCATTTCTGTGTGTGTGTGCATTTTAAACGGGCAAATATATTGTGCGTGCGTGTGAAAGAAGTGAAGTAACGGCAACATATACCAGCAACGTAGCAAAAGAGCGATCGAGTGGAGCAGAAGGAAGGAGCAACCGTAAAAATGCATACGTTCAGTGAGACGGGTGCAGGAGTACCTGCATTTCTGGCGAAACTGTGGCGCCTGGTCGAAGACAC…
GSR_IOB_NIMR_481	scaffold00004-scaffold06576	KB664448	;AGAP000440;	CGGGTTCATCGTCTGTATCGCCGAGAAAATGAGAGACCGGAAAACTAAATTTGTTTCTGTCTTTTGGCCCCGATTCAAAAACTTGCTTCTCGCCGGCTTTGGTTCTTTTGGATATTTTGTTTGTGTGTGTGTGTGAGTTTCATAAAGTAATATAATTTTTTCCCAAACATCGGAAACAACCAAACGGTGGGGGGTGGGGGGATGGGTAAAAGAACTTGGTTTTGGTGTACAATCGATATGTTTAAATTATTTATTACAACGTCTTCTATGCGTGTGTGTTTGTTGTATGTAATGTTATACATGTGTAAATGATAGATGATGAATTCATTCATACGGCTATATACACAATTGACACGGTTACTAAAAGGCTGGTGGTATTGCTCGGTCGCATGCGACTAG…
GSR_IOB_NIMR_482	scaffold00036-scaffold03412	KB664552	AGAP012108	GCAGTCCATTGACAGCAAGGCGTGACAACACTTTGCCCCCTCTCGTCCTCCTTTTTCACATTTTCTTCACCCCACACACACACACACACCAACACTTCATTTCTTTCATACGTCAAACGAGCGTTTGTCAAAGAGCTTCTAAATTGTTTTGGAAACTTTCCAAACTTTGCTACTGCGCGAGAAAGCAGCTCGTCCGGTTCGGTTGTCGCGTTATTTTGCGTGTGCGTTCAGAGGATGTCGAAGAAACCAACGACGGGCCCGGCCCTGCATAAGGTCATCATGGTCGGCAGCGGCGGTGTAGGCAAATCCGCCCTAACGCTACAGTTCATGTACGACGAGTTCGTGGAGGACTACGAACCAACGAAAGCGGACAGCTACCGTAAAAAGGTGGTACTGGAC…
GSR_IOB_NIMR_483	scaffold19467-scaffold00005	KB664289	AGAP007325;	ACATTACTTAATAAAAAAGTAATGACAAAGTGAACACACACGCACACACACACTCGCGGGCGCATGCATTGTGTGTGTGTGTTTCATCAAATCTGCACACGCGCATCATTtctctctctctctctctctttctcGGTTTCTGCGTCCATCTATATATATATATACCTTTCGTCTTAATCCTTATCATTAACCACACCTGCATGTATGTGTTCGCGCTCTGCGTTTGTCCTCTTGTCGAGTGCGTGCGTGCGTCTTCGTCAGCGCACATCCTCCTCCTAGCATCTTAGCGACGGTCGCGAGATCCACTGCGGCTGCGACGGTCGCGATCGCGCTCACGGCTCATGCTGCGGCTGCGGGATCTGTACGAGCGGCGGGGTCGGCGTGTGCGTTCATCTCGGC…
GSR_IOB_NIMR_484	scaffold00001-scaffold00404	KB664449	AGAP010963;	TGCTGCTGTTGCTGTTGCTGCTGTCTCTTCACTATTGCTCGGGGTGTCTGCCATTTTGTCTACCACCATGTTGTGTCCATCGGCACAACCGATCAGGATGGTCGCAAACAGTAGCGCCATCGCTGTCAACGGTCGCTGTCGACCGCTGTACGTCGTCGATCGTTTGCACTTTATTCCTGCTGCACGCTCCAGAACAGTTCGATGTGGAATCATTTTGATCGACTTGAGCACTCACACCAACTGTCACTGTTCCAAATCTTCACTAAGCAAACTTTTAAAACGTCACACTTCAAAGCTCCTTCAGATAATTAACCCATCGAACATGGAAGCTAATGGTCGTCGTGTTGACGACCGTTAAACCGCGCCCGAGTTCAGCAGCGGTCCACGGTGCCGGGTGTT…
GSR_IOB_NIMR_485	scaffold03329-scaffold06239	KB664718		ATTCGGGTCAGTTTGTAGGTGAGGGGTATGTAGAAATCGTGCGAAAATGGGTGAAACTCGTGAGGGGCAATCTCGCTCGGGCGAACTAGCTGTTTTGCTCGTTGCAGCGCATGCGCTGTGCTGTCTTTGAATGTGTGCGTGCGTCAAAAGCGAGCAAAACGCCGCTGTGTCAAAAAATGTGTAAACAAACTCAGTTGGAGTTCAGAAAAATCTTACTTATTACCGATATGTGCAGTGCCGTGGAATAACAAAAATTGCTTCAAAAAAGCTGTGTGTGTGGCTGATACTCCAGCATCTTCCCATGTGTGTAAACAACGCCAAGAGTATTACTGTTTTGTGATCATCATATTTCATTCGGATTGCACATTACCGGGCAGAAAAAGCTTCAAGCAACCAATT…
GSR_IOB_NIMR_486	scaffold00163-scaffold02954-scaffold03474-scaffold00166-scaffold06291	KB664652		TCAATCAGGACGGATCCACAACTGTTTTTGATCACTTTCAAAACGCCATTTTCAATAATAATCCGATGGCCCATGCGCGATGCCACATCAAGCGAAATCAAATTAGCTTTAAGTTGAGGAACAAACAAAACGTTTCTAAGAAGCAATTGTTTCCCACCAATCGTTACGACGGCTGATCCACAACCTTCCACCTTTAGCTTCCTGTCGTCGGCAACAGTGATTGTTTGCTTCTCCGAAGCACGAAAGTCACTGAGAATGTCGCGTCTCGACGTCATGTGGCAAGATGCTCCGCTATCCAGGTACCATCCACCGGACATTTCTGCGAAACTAGCAGACAATGCGCTTGCATACTTTGCTTCTGCTGTTTTGTTCGCGTCTGCACCACTGACACTACCACTA…
GSR_IOB_NIMR_487	scaffold23034-scaffold00191-scaffold12354	KB664586	AGAP011113;	TACAGTTTGTTTCTCGTTCGGTTGTATCTCAACACCTCCGCTCAACCGAACATTCCTATCTTCTTTCGTAGTTCTTCATAAACTGGTCTCGGTAATCCTTTAGTGAATATATCTGCTATTTGTTCCTTACTAGGTTTAAACTGAATCCTAATAGTTCCTTCTCTTATCTTTTCTCTTATAAAGTGATGGCGAATATCAATGTGTTTCATTCTCTTTTGATCCTTAGGTTCCTCAGCAATATGAATACAAGATCGATTATCCTCAAACATTGGAATAGGATACTTGAAAATAACTCCTAATTCCTTCAATAAATTCTTCAGCCATATTGCTTCACATACTGCCTGACTCAGAGAGATATACTCTGCTTCTGTTGACGACAATGACACTGTAGTTTGCTTC…
GSR_IOB_NIMR_488	scaffold00120-scaffold06397-scaffold06795-scaffold00384	KB664566	AGAP008537;AGAP008537;AGAP008537;AGAP008537;	TTTGTTGCTCGTGTTGGCTGGCCACACCATACACTCGAAGCACATTTATATGCGCGTTTCGTTCGGTTGCCCCGCAGCTCTTTGTGTGGGTGTCCACGTTCGGAATTGGCTAGTGTTTGTCTGGTCTGGCGTGCGGTAAGATGGTTGTGGGAACGATCGCCCTTGCCCGGTAGATTCGGTGCTGGCAGACAGTGACAGTTGGTTCGAGTGGCCATAGCACGGAGGCATCGTAGCTGAATAGTGCGATCAAGTTAAACGATACAAACTAGCAGCCCATTGTGTACGCAAAGCGACACAGGACATTCACCTGCCTGGCCACCATAAAGCAGTACAGCGTAAGACATCGGACAGAGTGGTAAGCACACGGCACAGCAGCAGCATCATCACCATGAGCAACGT…
GSR_IOB_NIMR_489	scaffold10363-scaffold00078	KB664510	AGAP006279;	ATGGCCACACCAATATTCAACATCGTCGTGGTGGGCGATGGTGCGGTCGGCAAGACCTGCCTGCTACACGCCTACACGGACAAGTCGTTCAAAAACTTCTACGAACCTACGATATACGATAAGGAATCAATTGAAATGATACTCGACGGGCAGAAGTACACCATACAGCTGCACGATACGGCCGGCCAGGAAGAGTACGACAAAATCAGGCAACAGTTTTACAAGCGGGCCCATTGCTTCCTCCTATGCTACAGTATAGACAACAGAGTTTCGTTCGAGAATGTGTCCACAAAATGGATTCCCGAGATCAAAACCGATCCACCCGTTCCAATTGTTTTGCTGGGCACCAAGCTGGACAATCGAAAAGGAAGCAATAATGAAGTGTCCACAGGCGAGGGC…
GSR_IOB_NIMR_490	scaffold00025-scaffold00915	KB665288	AGAP008522;AGAP008521;	AAAACGAATTTATTCGCTAACTTCTATAGTAAATGAAGATTTATGTTTTAAGTTTCTTTTTCTTCGGTTTGGCTGCGATTGGTGCCGGCGCTTTGAAAACGGTATGGCATGTGGTACAGATGGGACTGAATTTGCAGAAGATAGACAAACACACGGAACACACGTAACCGATATCGATCAGCTCCCGATGGCAGAAACAAGCAGCACGATAATCAACCTTTACCGGTGGCGGCAACACTAGCTTGCAGCGCATCTGCGGATCTGGCAGGAATACCCACAAAAGATACTGAAGAAAACCCTCCAGCTGCTCGAGCCGGAGGTACTGTCCGCCGGTAATATCGCAGCCCTGCTGCAGCAAACTAAGTGCCTTATCGAGTGCACAAACATCTATAACGACGC…
GSR_IOB_NIMR_491	scaffold05080-scaffold00030-scaffold02348	KB664888	AGAP010608;AGAP010608;	ACACTATTTTTTTCTCCGTTTATCTTCGATTCATGTTTCTTTTACGTCTATAACTGCTTTCCCGCATTTGAATGTTTGCGTGTTTGTCTACGTGAGAGGAATTCTGTTTACAGCTTTAACCAGCTATACTTATACACAGTGTATAATATAGGTAATGTATACTATTATATATACTTTCCCCGAATCGCTACACAGCATTGCCACGATATTGGTTGTGTGTACTGTTTGCCTTACCCGGTATCGGTGTCGCTTTTTTGCCTTTTAATTTATAGTTATATTATCGCAATAATTGCATTATTGTAATATGTATGCGGACGAATCCTTGCGCCGGAAACGCTTAAACCTTCTTGGTGGCCTGGAGCGGGTTTTGCTTCAGCTGCAAAATGATGGAACGCATGC…
GSR_IOB_NIMR_492	scaffold01927-scaffold00003	KB665376	AGAP003790;AGAP000840;	GTTCGACTCGATAGGCAGCATGTCCGATTCGTCCGAGGAGCAAGAGGCGCAAGAGTACGTTGAGGTACCGTGCACACCGACCGTCTACCCGGCCGATCCGTTCGATGCCAACGAAGATGCGGCCACGCTCCGTACCGCGATGAAGGGTTTCGGTACGGACGAGAAGGCCATCATCGAGGTGCTGGCACGGCGCGGTATCGTACAGCGACTGGAGATCGCCCAAGCGTTCAAGACCTCCTTCGGCAAGGATCTGATCAGCGATCTGAAGTCGGAGCTGGGTGGCAAGTTTGAGGACGTGATACTGGCGCTCATGACCCCGTTGCCGCAGTTCTACGCCAAGGAGCTGCACGATGCCATCTCGGGCATCGGCACGGACGAGGAGGCGATCATCGAGATTCT…
GSR_IOB_NIMR_493	scaffold00025-scaffold03436	KB665343		CGGTGTGGAGTAGATTTCGTGTCAAATTGATCGTACAAAGCGAGTAAAAGTGTTGCACCTTTGCCAGAAAGTGAAACGTAGTGCAAAGTTGTTTACGGAACGCAGCGGAACCTGCATGACCGATTACCTTTACAAATCACACACGCTTTGGCGCCGCCCAGCATGAAGAAAGGTGTGGAAACGACAACGAAAACTTCAAAAGCGGTCGTTGCAGCAGCTGCAGCCGCTGCAGCCGCAGCCAGTTTGGCGAAAGAAAGTGTGGATCTGTGGGCGCAGCAGGACTGGATCAAAAGCATTCTGTCCAAGTCGGGCACCGAAATTAAGGAAGTTCCGGCAGAAGATCTATGCAAAATGGTGTATTATTCTGGTCTTCCGCTGCTTATGACgcaacaacagcag…
GSR_IOB_NIMR_494	scaffold05207-scaffold00037-scaffold02770	KB664549	AGAP008516;	ATGGAACTAAAGGAAGAACTATTGTTCCTCGAGCGGGCCGAAAAGAAAGACCAAGAGAGACGGGAAAAAACTTCTCGGAACGTCGTCGAGCCAAGCTGTAGAAGAAAGTGTTACAGTTGCGGTGGCTTTGGACACGAGTCTAATAAGTGCGCTAAAGCAGGACGCAGGCTTACGTGTTTTAAGTGTGGCGAGGCGGGGCATATTGCCCGTAACTGTGTGCCACGAAACGGCAGAGAAGAAAGAACATCGGGAAATGTAAATGTGGTGGAACACACAAAGGTGTTGACGAAAAAAGTGCTCCTTGGAACTAAGGAGTGTGAGGCTCTCGTGGACACTGGCAGTGAAGTGTCGTTGGTCAGGCAAGATTTTATTGGTGAAAAGACGATGAAACCATCGTGT…
GSR_IOB_NIMR_495	scaffold00011-scaffold01137	KB664844		GTTCTGCTTTGCGTCGAGGAACGTTGTCCGTCGTGTACCGTCGTTTGCCGGTCAGGTTCGTGCTTGGCAGGTTTGGCGTGGTGTGTTTTGTGCTGGATAAACACTGGAAGAGGAACGGTGTATAAAAGGAAGCCGGTGCATTGTTCGCCGAATGTGCAAATGTGTCAATCTGAATGGGAAAATTGTATTCCAAGTGCAAGATAAGAGAATTCCGTACCAGAGAGTTTAGTGTTTTTGATCCGTACAGGTGGAATATCTTACAGTGGTGTTTGCTAACAACACACGTGATCATGGAGAAGAAAGTGAAAAGTTGGTAGTACTAGGTTCGGACTTTTTACTATCCGATTGAGATCCGTGCGGCACAAAGCAAGCGTAAAGGAATTCAATCACCACCATCGT…
GSR_IOB_NIMR_496	scaffold01848-scaffold00003	KB665165	AGAP003886;AGAP003891;	AACAAAACAAAACTGTTTGAAACTTTATTTGCCCCGTGCGGCTGATTCTAAATCAAACAACACGAAAAACAGGTTTCCATCAACAGGCGGTAAGCTGCGCGAGTGTGAGTTTGCATCTCTTTGCCCGTCGTTCATTGTCTCTCGTGTGGTCCATGCCATCGGTCGGCGTTGTACTGGCCACTCAACAGTGAATGGTGCATAAAGAAGGCACACTTTATGCTGAACAGAACGGCGCATGTGCAGTTGGATGTAAACATTCCGCCCAGTTAGTGTCTCCAAGTATTTAAAGTGATCCGTTTGGATGTAGTTAAGTGGCCTGGAAAGAGTGCATTTAGTGCTGTATTGTTTGTGTATTTGCGTGAAGCTGCGCCAGAGAAAGGAAACAACACGACGCACAGA…
GSR_IOB_NIMR_497	scaffold07005-scaffold00053	KB664430		CAATAACGAGAGAGAGAGAGAGTGGGAGAGAGAAAGCAAAGGAACACTCTCGCAGTTACTGAAAGCAATACTGCTTGCGTGTGTGCGTATTGTACAACATGCCCCCCACACATGCACCAGGTCAGGAAGAATAGCAATAGCCGATATCAGGAAGAGGAACGCATCGCCCCATCCCATCCATTCCCAGAGAAAGCAAAAGAGAACTCAAAGAAGAAGAAGAAGAAGAAGAAGAAGAAAAACACACTCACACTCATCAGGAAGCCATTACCCCTATATATTAACATCGGATAAACATATATAAAGCAAGAGAAGAAAGAAGGAAGAAGAATTACAAAACAAAACGGGCAAAAAAAATGGAAAGAAGAAAAAACCCTAAACACAGATTATAAAAAGCGTAAT…
GSR_IOB_NIMR_498	scaffold00460-scaffold00039-scaffold06283-scaffold03248	KB664439	AGAP005725;AGAP005725;AGAP005725;AGAP005725;	CGGCTCGATCGTCAGTCGGTAAGCCGTTGCGCGTTGGACGAGTCGAAGACGTTTGGTCGCGCGACTGGAGCCTTGAGGAGCGTGTGCGAGTAGAGTGATTCGGGGTCTGTTTTTTTGTTAGTTGTTGTTGTTGCGTTCGTTCGCTGTGCGGGATCCGACGCACGACAGGATCTCGGATACGTTCATTCAACCGTTTGTCGTGCCGCCGTGTGGACGCAATCGCTCGTTTGGTCTAGTGGTGCACCGAGAACCCAACACATCATCTCCAGGATCTCCTCCTGTGCTGTTGAGCAAGTGCCTCCGGTTAATCTGGTGCAGAAACGTCTCGGGAAAGGCCGTTCATTAATAAGTGGCCGCCGCTGGTGAACATCATAGTGGGTGTGTTCCAGTACACAGGTG…
GSR_IOB_NIMR_499	scaffold00145-scaffold00240-scaffold00417	KB664345	AGAP006396;	ATGGATGAGTTCCACCCGATCTGGGTACGCGATGCACCGGATGCAACGCTGCAGGCGATCGTGTACAAGCTGGTGCCGGGACTGTACGAAAATGAGCTGCGCCGGCGGCGCGCCTTCTACCGGCTGCACCCGGAAATGGCCGCCATTGCAACACCCGAGCAGCGGGGCGAAGATACCGAGTATCTCATCTTTAGCCCGAACGAGAAGATCTCACTATCGCTGGAGTACGCGGAAAAAGAACTGGCTGAGGACAATGAGGAGCTGCTGAAGGCCAAGTATCTGCTCTGTCCGGCCATCTTTTCGATCGCGCTGCTCAAGAAGTTTATCATCTACAAGTACGGCATCTCGGAACGACAGTTTTGCGTCGAGATTATGTACAAGGTGAAGACGATCATCCTG…
GSR_IOB_NIMR_500	scaffold00076-scaffold04611	KB665176	AGAP000005;AGAP000005;	TGCAGCGACCGTCTATCGGCACACTACAGTTGCTGGTCGACAGCGGGCAGAACAGCAAGCAGCAGTGTACGGAATCTACTTATTATAGCGAAGCATAAAAGCAGAACAAAAACGCACCCATTGCGTGCGTGCGTGAGTGTGTGTGATTTATTCAAGTGTGCGCGTGCACATAACAAAAAAAAGCAAGTGGTGGTGGTGTTTCCGTGCCAAAGGGAAACACACACACACACAAAATAGTAACAACCAAAAACAAACATACAGTGAAACATAATATAAGTGGTGGTGGCGTGTGAAAATCCCCAAGAGACGGGCGACACAGCAGCAGCAGCGGAAGGAGATTCGTTACCGTTTCTGCACATCGACGAACGAGACGTGCGAGCGGGACGCTAGGCGGAAGGT…
GSR_IOB_NIMR_501	scaffold17323-scaffold00003-scaffold00013	KB664428	AGAP004189;	aaaaataaacatataactaaaccgtcatgcacgggacggaacacattaggacaaggaaaacaatacaagggaacggaatgaagcaaaggacatgctatgggcaaacaaatcacctactgaattgaagtcagataatgcgcgcatgcaagggtcattttgagtggagggcgaacgcgcaagcggtaggatgggacatagatgggaatggctgccaggagggtatgggagtcaatgttggcaagaaggatgttggcaataaatagtctgtgcgcctgacaaggacggtcttttaagccaacgagcaattgacaccgtaccgagtatggaggagaagcgccttacggcgattctagaaaacttccgttgtaccctctccaacctatccatagaggtgacacc…
GSR_IOB_NIMR_502	scaffold03434-scaffold00010-scaffold01982	KB664441	AGAP006653;AGAP006653;AGAP006653;	AAAAAGTTAAGATAGGGTAAAAGCGAACTCAAAACTCTCATTACGTGTGAAAGTGAAAGCCAAAACGCGGATCGAACTGGTTCACCAAACCACACTCCCGGCGGAAGAGTGGGAAAAAAGTGAAGGTAACCTTCTCGGACCAGCTCGATACGGCCAGTACCACCGGTAGTAACAGCAGCGTACCGAGCACACCGAGCCCCTCCGTATCGTCCGCCCAGCACCGGTGGCGCTATCTGGAGCAAATCTTCGCACCGTCTACAAGCGCAGCAGCAGCAGCAGCACCCCCGGCCGGGAATCGATCTACGGGGTCCTCCGAGTTTGATCGCGGCAGTAGCTTCCGGCAGAGCAATACGAGCTACGGATCGGTTGGCAGCAGTGGGCCGTACAATAGACGTGCAC…
GSR_IOB_NIMR_503	scaffold01040-scaffold02242	KB664511		TCATCAGTAGTTTATTGAAAGAGACATAAATTTTGTTTATTTTTTTGTTTTGCTACACAAGGATATTTATGATTTATTATTAACTCCCATTTTGCGTCTAATAGTGTGTGCTGGTAACTTATGTTGCAGCATCACCGCTCGATCATTCACTCTAAAGGTGCAAACTAGGTTGGTTTGGGAGAACTGTAAGTGTGCGGACACACACACATTTATTGCTTAAGGATCATCGTCGTCGTCGATTACTCCTATATCCTCGCCTTCCCCGTTGTCGTCGTCCTTGCCCGTGCTGCACAAACCTCCATTATTATTATTCATCAGCATTATTAGAGTGGTTTTAGATGTAACTTCCATCGTGTAAGTTTACGAGTAGTTAAGTGTGTGTGTGTTGGTAGTTATAAA…
GSR_IOB_NIMR_504	scaffold07412-scaffold00059	KB664745		TATCGTAATTTCTGTGTCGCTGGAATACATTTTATCCATTGATGTTAGGGGTTCAGTGTAATTACtttctgttttgtttgtgttgtttttgttctgctttgtttttttttctgtgtttcttgtattgttgtttttTTGTGAGTTGTCTTTTGTTACACTGGCGTATTGTCTATTCGTATATTTTCTTGGTATCATTGGTATGGTTTCTCGTCTAATTTGTCTTGCCTCTCGC
GSR_IOB_NIMR_505	scaffold02861-scaffold00111-scaffold14580	KB664510		CTGCCCACTCGCGCAACACACTTGCTCTTTTCTCCAAGTGTTTTTTCTGCCAAGCTGCGAACCTTTAACAAAGAGATAAACATCGCAAAGAATTGTGGAATAAAGTGTGCCCGAATTGAAGCGATCGAAAGCGAATTGCCCCTGTCGTCCGTAGCGTTCGAAGCTGTGGTGTACGTGTGCCCACAATATTGCAGCGTATTCGTACGTGTGCAGCAGTAATTGTTCTGTGTTATGCGTATTTCGCAGCTCAAGTACGCAGTGAAACGCTAGTCACAACAGTGATCTCTCCCTTCTCGTGTGTGCGTGTGTGTGTGTGAAGTGGCAACATCAAAAAGAATCCCAACGAAAAAGGTGGCCCCAGTCGTGTGTGATAACAGATTTCGTGAACTCCACGTAATT…
GSR_IOB_NIMR_506	scaffold00198-scaffold03174-scaffold13691	KB664510	AGAP005401;	CCGAAAGATCTCATTTATTTTCATTTAACAATGTTGTACAAGAATGAAGTACGTACGGATATTTCAATACAGGACACCGCTCTGCTCGGAACTTCAAAAGCCCTTGAACCACTTGAACCATGTTGTATTCCATGCTTTCCTCGCAATTCGTCACCTCTGTTTCACATAAACAGAAGAATCTTTCGAGTGCTTCCCTCAACACTTCTACACTCGCACTCGCAACAAAGCAACCATTGCTTTCCGTACTCTTCTTCCCTAGCATAAACATGGGCTCGTTTTCGTTAATAACTATAAACATTCGAAGAAGCAAATCCAGCAACCGCAGGAACCGAGAATTAGCTTACGGGACAATATTTTCTATCGCAAAAAAAGATATACGTGCGCTTACAGACAGCAGCA…
GSR_IOB_NIMR_507	scaffold08692-scaffold19765-scaffold00009	KB664888	AGAP010608;	CTGAAGAATTTACGGAGCAGCAACTTTATTTCATGACCTTATCGCTCTGCTGACGTTTCGCTACTGATCTACTTTTCATCCTCTGCCCAAGGTGATCCTTCTCATTTTACTCGGTACAGGGTGATCCTGCCTGCTACCCAACTAACGTTTTTGATTTTACATCCGGTCGTCCTGATTGAAGTCAGACCCTTGATCTTCATCATCTCCCTCTTCTGCTGTTAACGCATAAGCCCATAGCCTCATATTATCTTCACTTGTACTCGTCTCTAGCGGTCCTTCGCCAAGTCCTACTTTCCTAACGCGATACCGCCCGTTGCGGTTTACATGCATAATTTCGTAGGGACCCAAGTATTCGCTGGCAAGTTTCTTACCAGCAACAAATTGCGTTCGTTTGATAGC…
GSR_IOB_NIMR_508	scaffold05690-scaffold02249-scaffold20550	KB664714		ATTGGAACTAATACATTTTCTCAAGAACGAGAAAATTGACCTGCTCGCCTTAACGGAGACGCACCTGAGTCCAGAGAAGTCTTTCTATCTCCCTGAGCATACCATCATACGCTTAGATAGACAAGACCATCCAAAAGGGGGAGTACTGATTGCTGTCCATCGCTCTTTAGTGTTCCGCATACTTCCCCTTCCTGGCACCCATGTTATTGAAGCAGTAGGCATAGAAGTCCAGTCAACCCAGGGACACTTTCGATTCATCGCCGCCTATTGCTCGATACAAAGTCGTGATGCAGATGGCTCCACCAATATGCTGAAAAGAGATTTCCGCACCCTCACTCGCACATCCGGGAAATATATCATCGCCGGGGATCTGAACGCTCGCCATCAGCAGTGGGGCAA…
GSR_IOB_NIMR_509	scaffold00019-scaffold01361	KB664463	AGAP010012;AGAP009431;	TTTCTCATCTCGGACCGGAGAGACCGAGGGGTGAAAAGTGCGTAAAAGTGTTATTTCCGCTAGTGGTAGTTTGGCATCCGCGGACGGTCGGCCAAGGAGCAGGGAATTCGCTATCTCGTGGTACGAACCCGGTGTGGAAATCGTAATCGCTGATGGACAGACGCAACTCGAGTGCTTCCAGTGTCGATAGGAGTGTTGCAATATAAATATGGCTGTTGCTGCCTGTCTGAAAGCGTCCCAGTCAACCGTCGTCTATTCGGGTCAGGCTCAGCCAACACCACTGGTAGGAATGAACGGTGGAGGAACCGGTGGTCACCTGCAAAGTCAGCTGACCCGCTCGCTGGAGCGCATTCTGGAGGATGCGCATCTTAGCGGGGAGCTGAAGCTGAGCGGACGCAA…
GSR_IOB_NIMR_510	scaffold00132-scaffold03180-scaffold07099	KB664444	AGAP012516;AGAP012516;	CTAAAGGAATTCCATTTCTCGCTCAATCCCAACAAACTTCAGCTGTTCCGTTGGACCGTAACGGTAATCGAAGAATAGTTCCTCTCCCGGTTGTATCGCACGTTTTGCAAAGATGCCGATACGATGGTCACCGTTTACCATCATCACCTTGGCGTAGCAGTTTGGATTGATGGAGTGGTTGGCAAAGCGTATCTTGTTCCCCTTTCTGGTGGCATCCACAACAAAATCGTTGTTCAGATTAAAAAGAAAGCTGCACATGTACTTATCGTACACCTTGCCACGGCGATCCGCCTCATCCTGCGATATGATTTCTCCACAGTACTCCGAAATAAATTCATTTTTCTGTGCACTTTCCTTTAGGAAAATTCCCCATCCAGCCACATCCGACGGTGCCATTAA…
GSR_IOB_NIMR_511	scaffold00002-scaffold00606	KB664899	AGAP003725;AGAP003725;	ACTGTTAAACTTAAGTTTTATTATTCTATCAATCATGATGTTTCTTCAGCATGCGATGAAGCGAGATTTACACTAAATGAAGGGCTTTATTATCTCTTCTAGAAAGCGGCTAAACAGCTTAGTACTTCAACGGACCACGTGTCGGAACCATTCAAACTTTTCAGATTTTCAGTTTTAAAATGAATTTTGTTTTCTAAAAGTTTGAATTTTTTACTGAATAATCACAAGCAACGTGCGCCGATTGTAAGTCATAGGTGCAGTTTTTCCTCTTTTTTTTTTTCAAGGGAGAACTCTTATGTAGAAAAAGGCTTGCTTTCTCACTCGTTTTGTAATGTTACTACGCGAATCGGATTTTATGTGTAAAAGCTGATGAAAAATGGACTTTGCCGGATCTATCTC…
GSR_IOB_NIMR_512	scaffold00156-scaffold10994	KB664576	AGAP013111;AGAP002564;	AAGCGCTGGAAGTGTTCTTTCCGTACAAACATTCATCATTCCGAACTCTAGCGTACATCTCGCCGAGCTGCTCCGTCGCATAGTAAAAATGGCTTTCAAAGTTGCTGCCATCGCCGTTCTGCTGACCATTGTCGCCATCAATGCTGCGCCCCAGCTTGACCAGCTGCCCAGCGGTATGACGACGCCGGAAATCGGTGAGATCCAGGCGCCGGTCGGTGGCAACCAGACGAACCCAGGAGACCTGGGCAACAACCTGAACACGACCGTTCCCTCGAACCCGGCCGAAGGTGTTGGCGGTGCCGAGAACGCTACCATGCCGTCGAACATTGGTGGAGGTATCCCGAACCAGCTGGGAACGCGGCTCGCCAACCGCATTAACCGACCAAACAACCATTAATA…
GSR_IOB_NIMR_513	scaffold00261-scaffold00063	KB664618	AGAP004000;	AGGGTGGTTGTGTGAAACCCGTCGTCGACGTTAGCGTGTCCCTACGCGGGTTTATCACTCGACAGTCCGTACTCGGGTGCAGGCGGCTTGTCACAGTGCAACAGCATTAGAGTTCGGGTGTTCAATAGTTCTTTGTTGTGTTGTGTGCCTCTAATTAAGTGAGATTAGAAAAAAGAAACACCGAAAGCAAGAAGTATCCGACCCCCGTGTCATTGTGTGTTTGTTGGTGTGTGATGCATTTTATGGGGCTGATGCGACAATCTCACAATCAGCCGGTTCCGACGTATCGTGATGCATCAGTGCCGCAGGCGACACAACGAGCCACCATTAAACCGCCAAAACCGATCGATTCTCAGTGTGTAAAGTGTACCAAAATGCAAACCAAAGCATCACAGTTAA…
GSR_IOB_NIMR_514	scaffold00410-scaffold00032	KB664312	AGAP011122;AGAP011122;	TTTGCGATTGTACACATTATGCTCGCATTTATTAAATAGTATACTTATATATTTGTTTCATTCATTCTCTCCCGTTTGTGTGTGATTTTTTTTTTTGTCTTTTTCCGCCCACATGAGTTTTTTTTTATAAATTCTCTATCAGGATCAACACGAATTTCATTCCACATCCCATTCCCACCCGACCGCAACTTGATCGATCTTACACTTGCTTGTTTTGCGTACCTTATCGTGTACCGTTTAAACCAAACCTTGCACAGAACCTTCCACGTATTTCTAACTCGCTCTCCCTATCATGCTAAGCCCTTTCATTCCTATTCACACACCCTTCGCTTTGCACGGTTTAGCCACGTCAAAGGGAATTGTTGGAAAGCAAAAAGGAATCCTCGCCAAACAGAAATA…
GSR_IOB_NIMR_515	scaffold00217-scaffold07954-scaffold05550	KB664464	AGAP007857;AGAP007857;AGAP007857;	TTAGTAGTGGTTTTTTGCTGGTGATTTTTCATCATTCCCTTTGGGGTTTCATCTTTTGTAGTTCAAACTACGTGGTGAAAAATGGGGGGCGTACAGTCGGCCAACGATGGCCGGGAAATGCAAACATCTGAAAGAGAATCCTCTACCACACTTTTCTCCACAACTGCTACTCTCCCAGAAAGTGATGCTGCAATGAAAACACATGACGAATTACACGATGCAATCCCGCCCGTCGACGATGACCCTGAGCAAAAAGACGATCAACAGCGTGCGCCCGATAATGACGCTGCATACGATAGCGACGATAGCATGTCGGCAAAGTGTAGAGCACGAAAGATGACAACCGAGCTGGCTAATTTCCGACGTGACCTACAGCAGAAGCGACAGCTGCACCAATCG…
GSR_IOB_NIMR_516	scaffold00077-scaffold03891	KB664547		TACTCTTCATCTTTACTTTGCCTCTCAGCATAAACACAAATTGAAAACGAACCAAAAAACGATGGAAAGGCAGGACAGGACTCAAATTGTTTTATCTCTTTAATAGGCAGGACACATTTCCTTCACATTCGCGTACGCGCAAGAGATCAGTAGATAAAAGTACGGCCTAAAGTATCACTACACTAGTGTAGCGTCAGCTTAGTAGGATGTTTAGCAGGGTGGTGTTAATAATTTAACTTAACATTTGTACATGCCCACAGACGTAGTGGCCTCCAAAAAAAAAAAAATAAGATCAACTAAAATAAGATACCTTTCATTGGATTCTTTTTGTTTTGGCTAAATTACATACATATTACTTTACACGTCTCCACACGTCCCATACAGTTAGCTTAAAAAAAA…
GSR_IOB_NIMR_517	scaffold00017-scaffold06964-scaffold17799	KB664555		AGACATAATACTGCCCCCTGGTAAGCCCCCGTCGCAGACGAACAGTGTTTAACAGTGAAGCGGGTTGCGAAGAGCTTCAGCAGCAGCGCAGCAGCAGCTCCGGCTCCGGCAGCACCAGCAGCAGCATCACCAGCAAGTAAGCAGGCAGCAGCAAGCGGTGCAATTGAAATAATTTTGCAGAACCTGTAGCCGCGCGACCAAGTGTGCAAGTGCAATTTTATATTTCCCAAAAATCCCAACCACGCGCGTGAGTTCCTCTCACTACTACCACACAACACAACAAAAAATAGTAATGCCCAGTGAAAGAGTGCGTGTGTGAGATTGCAAAGTAAAAAAATGCGTGTGTAGTGAATTAAAAGCGAATTTTTATTCGAGTGCATAGTATTTCCATTTTCCACC…
GSR_IOB_NIMR_518	scaffold00021-scaffold01754-scaffold03206	KB665287	AGAP011357;AGAP011357	CGAGCAGGACGGTTAAGCGCGTGCGTACGGGAGTGTGCGAGAGTGTGTTGTGTTTGCGCATCGTATTAAGACGTTTTGTTGTTGGTCGTCGTCCGACACACCCGAGTGGCCTGCATCTTTGCAAGCGTGTGCGCGTGGGTGCATCGTGTAACGGTGAACCGTCAGTGGAAAAGTTCAGGTGCTATCCAGCGAGCGGGACCGCCTAAAGGGTTCGTCTGTGTATAAGTAACGGGTTCAAGTTACATCGGGCGCCAGTCCTCCAGGTCAAAAGGAAAAAAGTAGATCAAAGCGTCCCAACCATGTCACCATTCGGGTTCAACGATCCGCTGACGGCGATAGCATCCGCAGTCACGGGTGTAGCGATCGTACTGTCACTAATCAAATACTACCTCTACCTCA…
GSR_IOB_NIMR_519	scaffold03973-scaffold00029	KB664412	AGAP008412;AGAP008412;	ATTTTATTTCCATTTTGCATTATGTTTTTGGCCATTAGTTGTCGTTTTTTCCCGCTGTCCTCAATTGCTAACAGTGATTTTTGCACTACTACTATGTCCTGCACTATGGGAAAGCCATCATACAACGACGTCTTCCAGTCGTTCGCTGCCTACTGTGTTAAGAGAACATCAGCCGTAAGTAGTTGTGTGTGGTGTAGCTTTGCTTTCTACGCTTATCACCGGCCGGTTCTACAGGACACACAAGCGAGTTGTTGGGAGGTTTACTGTGTGGTGGTTGCTTTAAGAGCGGATTCTATTTTTTTTTCTCTCCAAAACTTCGGACATCATGCCCATTCCGTTTGTCAGGTATCTCCAAAGAGGGTAGTAGCAATAAGAAAAAGGGTCCTAGTAAGGATTAGT…
GSR_IOB_NIMR_520	scaffold00028-scaffold00677	KB664499	AGAP011954	CATAGTAGGGTGCGAACGTTAGAAAGTGAAATTGTTTGTCATTCAGTAGGGAAAAGTCCGTAAAGATGGAAGCCGCTGACGAAAACGACTCCAAGCCTTATGATACTCGGCATGAAAGCAAACCACGCAGCAACACTCACCAGCGGTCGATTGTGACTGCACCAGCCGTGTCAGCAGCCATTATGGAAGAAAACTATGACACAACTCATCCGAAGCTTGGAATAGCGATTATCATTAACCAGGTGAATTTCAGTGGTATGGCTAAGCGAGAAGGTAGTGACCGGGATCGTGATAGTATTGGTGCAGTGTTAGAAAGCATCGGATTTGATGTACGCGTGTTCAATAACCTCGATAAAAAGGATCTTCTAGACGAGCTGGATAAGGTTGCTCACGAAGATC…
GSR_IOB_NIMR_521	scaffold00120-scaffold06397-scaffold06795-scaffold00384	KB664566	AGAP008537;AGAP008537;AGAP008537;AGAP008537;	TTTGTTGCTCGTGTTGGCTGGCCACACCATACACTCGAAGCACATTTATATGCGCGTTTCGTTCGGTTGCCCCGCAGCTCTTTGTGTGGGTGTCCACGTTCGGAATTGGCTAGTGTTTGTCTGGTCTGGCGTGCGGTAAGATGGTTGTGGGAACGATCGCCCTTGCCCGGTAGATTCGGTGCTGGCAGACAGTGACAGTTGGTTCGAGTGGCCATAGCACGGAGGCATCGTAGCTGAATAGTGCGATCAAGTTAAACGATACAAACTAGCAGCCCATTGTGTACGTACAGCGTAAGACATCGGACAGAGTGGTAAGCACACGGCACAGCAGCAGCATCATCACCATGAGCAACGTAACCGTACTGGATGGAGGGTTCGCGACGCAGCTTTCGGTGCACG…
GSR_IOB_NIMR_522	scaffold00217-scaffold07954-scaffold05550	KB664464	AGAP007857;AGAP007857;AGAP007857;	TCGCAGCGGTGTCGGCGAGTTTGTCGGTCAACTGTGCGGCGTTCGACCAAAAATAGCTCAGTCTAAGCGATCGCTGCCTCTCGAAAAGACATCCTGCTTACACTTTGTTCGCGTAGTGTTGCCCGCTGTCTGAGTTCAAACTACGTGGTGAAAAATGGGGGGCGTACAGTCGGCCAACGATGGCCGGGAAATGCAAACATCTGAAAGAGAATCCTCTACCACACTTTTCTCCACAACTGCTACTCTCCCAGAAAGTGATGCTGCAATGAAAACACATGACGAATTACACGATGCAATCCCGCCCGTCGACGATGACCCTGAGCAAAAAGACGATCAACAGCGTGCGCCCGATAATGACGCTGCATACGATAGCGACGATAGCATGTCGGCAAAGTGTAG…
GSR_IOB_NIMR_523	scaffold00058-scaffold00766-scaffold00244	KB664732		TTGATACACAAACAACAAAAATAATATGTATTGTAGCTAACGGACGTGTGCGTGCGGCGCACACGAACGATTCAAGTTTAGCGTTTACCCGCTAGATGGCGGTACGATGCAACATTGATGGAAAGCTTTCACGTAAGCTTAGCGAACATAGCGACACAAACGGGTACAACCGGTACCACACAGAGCACTGCACTTTCTTCCTTTCTTTGTTCCCTAACCAGAAGGGAGTAATGGCGCAGTATCGGCCCAACTACTGGCCGCTGACCGTACGTCCGTCGTAGATGTCACGGAGCTGTACCCAGTACTCGCCAGCGTACACCAGTGCCGTCAGCAACGTAAAGTCGGCCGATATCCAGTTGTACGTGTAATTCACGCCGTAACCCTTATTGGCAAACATCA…
GSR_IOB_NIMR_524	scaffold01384-scaffold00136-scaffold05206	KB664510		CCAAGAATTACCGTATCTAAATTGCCTTTATTTCTGCCTTCATGCATTCATTATACAGCAGAGCTCGCGCAGCCAGCAGGAGAGCTCGCCTCGTCATCGCCTACTTAGTGAGAAATGTGGAAAGCGTATTTTATATATCTGTATCCGGTTTTTGTTTGGTGCAAAACCCAACCCGCTCGTTGTCTTCCCCAAATACTATCTCCAAAACTAAACACCAGATGAAGAATTTTTGGGGGCCATTTTGCGAACACTCACATACACCCCCATTGGGTCCTTATCCCAAAATTCTTTCTATTTTCTTCTGCGCATCTTTAGTACATCACCAGCATAGGGTGGAAGGTTCCACAACTAATATCATAATACGAACAAGAGAGGGGAGCGATAGCGTACATTTCTCAA…
GSR_IOB_NIMR_525	scaffold00724-scaffold00002	KB664580	;AGAP002942;	TTATTTGCTCTTTATTTCTGATTAGTGCTAATACATATGATATCGTTGCAAAGCGTTCTATTTTTACAGAAAAAAAGGCTCTTGTGAATATAGATGAAAACCCAAACGTTTTACCGAAAATTTTTGTCGCATGTTTTTGAAAAGAAGCAGAAAAGTGGGTCCCCAGTCACCCAGGGGACCGCCAAGGGAAAAGAAAGAAAATTTAATTTAAACACCATCCGGCACGAAAACCTGTGCCAAAAACATGTAACACAATAATCTATCGTTAGATTTCTACCACCAGCTTATTTTAGCTAAATCGATGCTTCTATAGCTAAACTGTTTCTTTTTTGCTGATAATTCTAATAAATGTCGCTTGTTTTACTGCAAACCAGAATATTTTGTGCATAGAAAGGTGCC…
GSR_IOB_NIMR_526	scaffold01203-scaffold00119	KB664523	AGAP003735;AGAP003735;	ATTAAGAAAATGTAACATCTAAGAAACAACTAGCACTAGAGGGTAGAGCCAATGTGAAATGTTTCGGAAAATAGGCAGTGGAAATTGACAGATCGAGAAAGAGGAAAAAAAGAACAGGGCGAACGCTTTCTTTCTTTAACGAGACTACATCCAGAGTACAAGTGTGACAGAGCACAAAAAGCGATAGTATATTAACAAGTAACGAGATCAATTCAAACATAAATAGTAAACAAAAACACAAACAAAACGTAACACAAAACTAGGTAAGAAAAGTACTAGCAAAAATTAAAAAATTAAACATAAACTTAAACACAATAAAACTACAAAATTTCCAACAGCTTTCGTTCCTTTTCAGCAACTTGCAGTTTACCGCACGCTCTGTTGACCCTATCAGCTTTA…
GSR_IOB_NIMR_527	scaffold15902-scaffold03851-scaffold00171	KB664434		atcacacaacacttatcgggggactggagtaggcaatttttgcgacatcaaacagagaaggaatttagtacagattggagaagacaacagtcagcagacaaggacacaggaaggaaaatcttgagatcatctgcgtgttggccttgtcccttattggtgaaactgattgcgcagcgataatgtatgcgctgggctttagcgttaacccttttcgttgcatgttctttactctcgtatttcgtcacatggtctgggtttgtaattatgatttccttatgctttggCCTACCCTGACTCGTTATCATTGTTTATCATAGTTTCGTCTTTGTTGCGATTTG
GSR_IOB_NIMR_528	scaffold00253-scaffold00016	KB665054	AGAP001415;AGAP003220;	ATGGAAAAACACTCTAAAAAGCAAAACCACGACTAGAAGTGTTGCAAACGCGGGAAGCGATCGTGTCGATGCTTCACAGTGCATTTCATCGCTATTGTCCAGCGGGCCGCAATTTTTGACGCCATCGCAGCGCAACCGCTCCGAGATGCAGTACCCGGACGTGAGACACTGGAAGTGGTAGGTCGATTCGCACAGCAGCGATATCGTGGACGAGGACCCGACCGGTGTGTCCTGTACCTCGGTCCAGATGATACGGAAACCCTGGGCACCGATTGCCTTATCGGCACTGGTAAAGCTGATGCGGGCAGTCTGGCCCTGGGTCACGTATTGCCAGTGCTCCATCGCGGGCTTTTCGCCACACATTTCGATGGGCGGCATGTCCGAGTCGGGCGATAGCCA…
GSR_IOB_NIMR_529	scaffold00014-scaffold11832-scaffold20030	KB664548	AGAP003405;	TGTTTTACATCCTTTTAATAGTATTACTTAATTCCTTTTTAGCGACATCATAATTACAATGTTTTTTTAACACGACCCACACTTCCCTAGAGCATCAATTGTACTGTTAAAAATAACAACAACTAACAAATGATATGATAAAGTTCCCAATTTGGCCACCGTACCGTCGTTCCCTCTTTTGTTTCTCTGGCCAAATTGGAATAAAAAAAAACCAGAAAGGTAAAACGTTAAAATTCATTGCGCCTTCTTTAAGTAATGGCTCAATATTTGGGGATTGGAAAGAAGGGAGGAAAAACAACTGACAGGTTTTTGCGGTGGTACATACACATTGGGAAAGATTCTAGCCTGAGGTAACAAAAAAAAATGGAAAGACAAAAGGGAAAAGGAAAACTAAAATTA…
GSR_IOB_NIMR_530	scaffold00332-scaffold00069	KB664533	AGAP005807;AGAP005807;	AGCGTTTGTCTGGGTGGTTTGGTGTTTTCCATCCGCGCTTTTTCCCCGCAAGCTGGATTTTAAAGTTTTAAAGTGCAAAGTTGTGTAGAATAATTTAAAAATCTATTCAGTGGAATCTGCCCCTGTTTTCCATCTTCCCAAACAAGTAAAAGCATCATTACACCACTACAACAACACGTAAGCAACCGGGCAAGCCCACCTTCTTCCAGAAATCACTCAGCATCGAGGATATTCGACCACCATTTGTTTAATTTGAGCACAAATCAAATTAAAACGAAGCAGCGCAAAGTTTGAGTGAAGCAACCGTCCAATTGATTGATTTTTCGTTGCGCCGATACCGAAAAGTTGTCTCATCTTGAGCGAAAGTATGGCGGCGACGCAGAAACGACTTGTGCACAA…
GSR_IOB_NIMR_531	scaffold00080-scaffold06617	KB664954	AGAP010933;	ATGGAGCGCGTTTGGCGTAAAGTAAATCAAGGCCTAACGTTACGATCATCATCATCGAAGGCCGGTGGTGTGAGCGTCGGTGGTTCACCCGTGCCAAATTCTTCGTCGGCCACAGCAGGCACATTGGCCGGGTCGGGCGCCACGGCTGCTGCTGCTACTGCTGCTGGCCCATCGTCCGGTGTTCCTCACTCGACCGATACGACAAGTTCGGCCGGTTTCGGTGAATCACAGGTGGTGGCGGTACAGCGGCGCCGTTCGGTGGTGCCTCAGGCAAGCACAGCCTCGTCGGAAAAGCGGCGACGTCGGCGAAGGCGCAGCCGACCCAGCCGGGAAGGTGCATCGCAAAGCGGACATGGATCGGGTGGTCACCACAAAGGCCATTCCTCGAACGGACGGCGA…
GSR_IOB_NIMR_532	scaffold03300-scaffold00663-scaffold03027-scaffold00024	KB664433	AGAP006812;AGAP006812;AGAP006812;	TGGCCTGCCATTTCCTTCCCGAGCACAGCAGGACGATCCTGACACTTACGACACCGATCTCGGGATCACGCCCAGTAAAAGATCGCACGCCCCAttttgattatcttttttttttcttcttttatttgtcgttacttttgttttgtgttcttttgttgtttgttttgtcttAACAAATTATTGATTTGTTTCGCTCCGGACACACACGCGGCTGGTTGCGTCCAATTTTTGTCAACCGTTTCCCTACCGGAAAACCCGTCTCCTCAGCACACATTCTCACACGCTCACTCACACTTTTTTGTTGTTGCTGCTGCTGTTTCCTTTCACTACCTTTATCCGGCTTTTTTTCCTTTCAATGCTTTTGTTTTGCTTTAGTAATCGATATTAATATATATACTC…
GSR_IOB_NIMR_533	scaffold06457-scaffold00030-scaffold13913	KB664434	AGAP001923;	CTGGAGTTGGTGTTCAGATATGTCAAGCGATGCCTTCCTTGCAGCATTTCATCGCTTCACTAGTCGACGTGGTTTGAGCAAGGAGATTTTTTCGGACAACGGATGCAACTTCAAGGGAGCCAAAACGGAGCTGCACGAGCTGTATCAACTGTTCCAGAACCGAGCAACCGTCGACAAAATGGAGGAATACTGTCAGCCGAAGAAAATCGTGTGGCATTTTATACCACCCGAAGCACCAAACTTTGGAGGTCTTTGGGAGGCTGCAGTCAAGAGCACGAAAAACCATCTTAAGCGAACGTTAAAGGACGCCAAGCTAACGTTCGAAGAGTATACGACGGTGCTGACCCAGGTGGAGGCGATCCTGAATTCGAGGCCGCTGTTTGCTATTTCTACCGATAC…
GSR_IOB_NIMR_534	scaffold00092-scaffold12980	KB664345	AGAP006396;	TTTGGAAATGATCGTTCGGGTGTTTTTTTTCTTCTTCAGATTCGCAGTAAACTATTCTTACGCGTCGCCAGAAACGGTCTTCCCTTCATCGGACAGTTGAAACGCTCAAACTCCCTCTGCACCAGCTCCGACTTGTTGCCCACCAGATCGATCAAGTTGTTCCAGTAGCTGTTCGCCGCGATCGCGTGCCCCCGCTGGCTAAAATGGAAGCAATCGACCGACGCGACGCCAGCATCCGTATCCCCGTTCTGAAGGGTGGGCAGTGTCAGATGCTCCGGAAACGGTTGATAGTTAACGACGAAATCGGAACCCACGTTAAACTCGTCCCGCTCGGCAACGGTCTGCTGTATCCGGTTCCACTGCTGCATGATACGATCCAGGCGTGGCTGAAAGGATGCG…
GSR_IOB_NIMR_535	scaffold10686-scaffold16173-scaffold06540-scaffold00036	KB664288		ACACGCATCCTAGCCTCATCCTAACACGCATCACTAGGAGACCGATGAGTGTCTCTCACGAGCGGCACTCACCACTTCGGTCTCAGGGGTAGGCAGTCTATCGTATGCAACATCTCCCCCACTAATACCGGCGGTATGGTTCCATCCACTGAGGCGATCTGCGAATCCTCGTAGATCGTCGTAGAGGCTGTACCGGCGTTGATGATCCACTGTCGGCTGTAGCAAAACCTGGAGATGTCGCCGATCTTACCTCTTCTGAAGACGACGATGTTGGACTGTCTGACTGTACCGTTgacgacaacaacaacggtgaagacgatgaggatgttgggaacgacgctgacgatgacgaTTCTCTGTCACGTGATCTAGCTATCTCTATGTTTGATTCAGCGTTTT…
GSR_IOB_NIMR_536	scaffold00011-scaffold03042	KB664474	AGAP005924;	CGTCGTCGTCGTCGTCGTCATGTGAGGTACCCGTTTAGATACCTCTAGCTGCTTGTTCGACGAGTTGCTACACTAAGAAACTGTTCGATGAGACGCTCGCGATTGTGAAGATGTGTCGATAATTCTAAACTGACGCATTGAGGTTATGATGGAGCGATGATGATGATGATGATGGTTTGCCAGATTGCTAACGGTAGTAACTTTTATCCGATCCAGTTATCCACTTCGGTTCGCTACTGTTTGGTAAGGAATTGTTCTCGTATCCGTTGAAGCAGGCGCAGCAGCAGCACGCTAGCAGCAGTTCGATGATGGTTTATACGTCTTCTAGAGTATGTTCACGAACCAGTGAGCACTGCTCGCTCAGCATGTTTTGTCCGCCCAAAGACGGGAGGTTTCCTG…
GSR_IOB_NIMR_537	scaffold00054-scaffold17164	KB664602		CATGGTTAAAATATCGTTTAATCATCGGTTCATCCATTCACGGTTCATGTCCTTTCATTAACTTTATTATTGGTATTCACAATCGTTTCTCGCTTAATTTGGTTTGTTAGCTTACCCACGGCGGTAGCGGCGGCATATCAAAGAAGGGAAGGAGAGCCAGAGAGAAACAGAAAAATCGTGGGGACACTAGCGTAAAGGTACAAGGCGATCGATCGATCCTTGTTCCGGTGTGTTGGCGTGATCGTGTGTGACTGTTGTTCACATGGGAGTGAGGTTTTTACTTTGCTTTTTTGAAAAATTACTACTTCCCTTCCTAACTTTGTGGACATGCTCCTTGCCAGCTGCTGATAATTGATGCCCCCGCCCCTGCTTCTGCTTTCTAATTTACAATATCCACCA…
GSR_IOB_NIMR_538	scaffold02999-scaffold00004	KB665310	AGAP000848;AGAP000848;	GTGTTGTGTTTAAGGGCAACCGCAGTATGTGCTCCGGTCGGTACGGTGGCCGCTGGAGTCTGCTGCTGCGCTTGGGGCTTGCCGTGTGCCAATACGCGTCTGCGTCCGTCAGTGTGCGAGAGTGTATGGGGATTTGAGCGCTTTCTGGTGTATGTTTGTGTGTGTGTGTGTGGTTCCTCTGCATGGGTGGCTGTTTTCTACGCGCTCGCTCTCCGTTGGCCGCTTCCCGTCACCCCATCCCAGACCAGCCCTGACCAGGGTCGTCTTGGTCTGCCACAGCACAGAAAAAGGGGTTTTGCGCTCGAAGTGTACGCTCGAAGGATGCAGGTAACAAGGAGCGATTGAAGTACACCGCCACACGGAGTACACCATTTTCCGATCGGAGGATCAGGAATCACT…
GSR_IOB_NIMR_539	scaffold00037-scaffold00050	KB665199	;	TCGACAGCAGTTTTATTTCCCTTTTGTTTCTTTTTTTCTTTTCTTCTCATTTGATCTTGTTTCGGGCATGTCGGGTGTTCTTTTCTTGACATTTGTTTGTTTTTTGCCCTTATTGTTTTCGGGTTCTGTTTTTTTTTTCGGTTGTTTTCTTCAGTTGTTTCCTTCTCCTCTGTGTGAGTTAAAATCGTTTCTAAACCTATTCCTACGTTAATGTTACAAATTTCAGGTACCGTTCTCACATTTATCGTCGTTCGTCTTCCGTCCAGCAAATACAAGAGGACCTGCCCTCACCGCGGGTTCATGGTTGATCGTTTTGCAAATTTCTTTATATTGTTTTGCGTTGTTGGTAATGTTGGCTCTGCACCTTAATTCGGTTGACTTAGTTAGCGAAATATGTTG…
GSR_IOB_NIMR_540	scaffold02169-scaffold00070	KB664499	AGAP005828;AGAP005828;	TAGTAGTGCCTGGCGCTAGCTTTGTTGTGTGTATTAGAAAGCGCCATACCGACCAGTAGCTACCATTTGTGACAGTGATATGTGCAGTGTGTGTTTCTGTGTGCATGAATTGTCCAGCATGAATGGCACCCGGTTCTAGCTTCTATTGCTTTTGTGATGCTGTGGCGCCACAGTGAATGGTTTCGGGAACAAAAGCGATTCTAGCAAACAAAAGCATCAAAACCACACAAAACCCCGTTGCCTCAGTGCGGCTGTGTGTGACTGTGAACGGGCGCGTGATTCGGTTGTGTTGGTGATGCGCTCCAATTTCAGTCGTGAAGTGAAGAAAAGAATTCAATTTAATACGAAGTTTGGCGAAGTTTAGTAAAACCGGAAGTTAGCTAGGACTCCTGTGATCGG…
GSR_IOB_NIMR_541	scaffold03132-scaffold00295	KB664510	;AGAP002552;	CAAAAATATGAACCGCTTTCGCGTCCTGGCTCGTTTACCTGCGTACACGATCTGTACCCGTGCTGTGCGTAGCCACATTTAATTGGTTTGTGTTTTCTGAGATTTTTACCCGTTTGATTACGATCACGCTTGCTTTTGTGGCAAGCGGCTTACCCAAGTATCGCGTTCGCACTACCCGCTAAATCAGCATGCATAAAGTCACAACGCCAACGAGAAGCTCGGTTTTTCGAAAAGAACCACCCGTCCAGAAGGACTACGACGGTATGTCGTTGTCGTCGTCGTCGTCGGATGAGGATGGGTACCTGTCGCCGTTCAATGGATCAGACGATGGAAGCGGCGTGATGGAGGGCAGTTTGCTGGACGAGATGCCCCCATTCTCGGCCTGTTCGATGTCCCCAT…
GSR_IOB_NIMR_542	scaffold06604-scaffold00016-scaffold16272-scaffold11440	KB664450	AGAP004205;	TTAGCCCTCGAAAGTAATTTTCGTACCCGCGAACGGCTTAATTCCACTCTGGGCCTGTTTCGCTGCCCAGGACGGATGGAGATCCGACGAGATGGTCGGCGGTGCACTCTTAACTCGTCTGGGATAGGTTACGGAAGTATTCGAAACGCTCAGCCCCAATCTGGCACGGAATTCAGCTGCTGTGTTGCTGGCTGTTGCATCTGGTGCGGTGGGGAAGCTTACCGTTTTCCCAGCGGAAGGAAGATTAGCTCTTTGCGCTTGCTTTGCGGCCCACGAAGGATGAACATCGGTCGGTGGATGGGAACTTGTGCCTGGTTGCATCGGATGGTCACTGTTGCCAAAGCCGTCCGTATTTCCATCGCCGAAAACGATCTTCTTTCCAGCGAATGGCTTGATTCC…
GSR_IOB_NIMR_543	scaffold00278-scaffold00046	KB664488	AGAP004619;AGAP009777;	TTTTTTGCTTGATTCTCTTTATTATTTTTAATAATTACTTACTTCTCCTTACTACGAAATAAGGGTTTGCTTTTTGTTTTGCTTTTCTCTGCACAGTTTTACTTTACTAGCGTGTGGTTGTGTGTCCGTCTGTGTGTGCGTGTGTGTGTGTTTGAGTTTTTTTACATCAATTAATAATAATCCTCATTTGCGTTATACGTTTTACTATCTTAATCTATACCATCCTGCCCCAACGGACGTTAGGAGGGGAGTTTTATATGTTACGAAGCACATGTAATTAGATTAACTGCACACGACACACCACACACTGCACACACACACACGCACAATAAACAATAGGGTTTGAAAAAGTTGGCTCCAATCGGTTTCACCTAGTCTGCTGCTGCTACTGATTGATTG…
GSR_IOB_NIMR_544	scaffold06044-scaffold06680-scaffold00075	KB664475	AGAP011503;AGAP011503;	CATAGTGCGAGTGATTAAAACAATTTATTTGACATAAAACTTCTACAAGTTGTACACAATTTTTCAATCAAATTTCAAACACGGATCATTCCTTAATGCACTTTGAAGAGAATTCCTTAATTGCACTTCCACGATTTTCTGCCAGCATCATGGCCACGTGACACGAACACAAGAGTCACTTCTTGTTAATATCGAGTAATTTATACAGCATTCCCTCTCAGAAAAAAACCCTTTATGAGACGGCGATTATAAAGATAATGCTGGTCATGGGGTGAGTTTTGTGTCCTGGACGCACACACACCAAAGGATGATTGGATCGACATAAAAAAAGATTTTCTATTTCTATTACAAAGATTCACTttgacgctcgaaagctgcttaaaagctggttaaaagttc…
GSR_IOB_NIMR_545	scaffold00197-scaffold08399	KB664808	AGAP004335;	CGGAAAATGACGAGCTTCACCTAGAGTTGCACGCCGTGAAGAGCAAGTTTGAGGTAGCTAGCAACATGGTCATAGATTTGTCTGAAGAGCTGGAACAAGTGGTGACAAAATCTGCTAGGAAAAAGGTACAAATTCACCAAAAGAACGAGAATCAGCTTAAAATTCAAGAATCAATAATTGAAAAAATTAAAGCAGACGTACACGAGCAACATGCAGACACCAAAGGAAATTCCCTGTTCGGTGAGGTTGCCGACCAGCGCAATAAACTACTGACGATATTTTCGAAGATGAAAACGTCTTACAATAAACTGAAGTTAGAGCACGCGAATTGTCCGAGACAGATACAGCAGTTGCGCTATATGAGCCAGCAATCCGAAAGGCTGTACCGACAGTGCATTA…
GSR_IOB_NIMR_546	scaffold00006-scaffold01329	KB664417		AATAATGCCCACAAGCGTGACCGGCGGCAACAGACCGATATCGACTATCGTTCTGGAAAGAGTAACCGCCCAACGATGGGGCGTCTCAAGGTTGGTAAAGTGTGCAAGAGTGGCCTCAGTGTGCTGTTGTGTTTGACTCTTCTGTGTCAAGTGCTGGTAGTGAATGGTGAAGCAATAGACAATGCAACTTTGTTATCATCCGATGGTGCAGTTCCGGTTGATGCATCAGAAGCTCTTGAAGAATCAGTAGCGAAAGATACATGGAATGGGGATGATTTGTCGACGAGTGCAGCAGGCACGACTCCTTCATGGGCAAGACCAGGTCCTCCTATGAACTGGACGGCCGCTGATGTGAATTCTACGGCAATTTCAACCAGTTCCACCCCTACGTGGAACGAA…
GSR_IOB_NIMR_547	scaffold01325-scaffold00016	KB664504	AGAP001410;AGAP001410;	CCAGCCTCGTCGGCGCTTCCTACTCCGATACGGACGATCTAATCAACGAGCTCGATCGACCGATTCCCATCACAACGGTCAGCGGAGTGTTGGGCAAACAGGCCAGCCTACCGTGCGACATAACGCCACTCGAGCGGGACGATGCCGTGTACATGGTGCTGTGGTTCAAGGAGGACGACAACGAACCGCTGTACAACTTTGACGTGCGGGGCCGGCAGGTCGCCCAGGCACGGCTTTCCTCGTCCGACAAGTACTTTGGCAAGCGAGCCTTTTTCCGGGCCACCTCCCACCCGGCCCAGCTGCTGGTGGACGAGATCAAACTGTCGGACGAAGGGATGTACCGGTGTCGGGTTGACTTTCGCAACTCGCCTACGCGAAATCTGAAAATAAACTTCACTG…
GSR_IOB_NIMR_548	scaffold02771-scaffold00010-scaffold00973	KB664525	AGAP005758;AGAP005758;AGAP005758;	CCGTACCCGTTTATCGGTTATCACATTTCGGTTCTTACCACCCGCCCACACAGGTCACAGATATCCCTTTCGATGTGTTTCGATCAGTTCGCGCCAAAAGTTGGCACGCTCCCGGGTGGGATCCGTCACCATCGCCGGTTTCACACCAATCTCGAGACAGTCGAGCCGAAAGTCGACCGACCCATCGCGAGGAACCTTCCTTACCGGGCTCCACTGGACATCGACAACATCCCGCGAATCAACCGACGGATCACCGTGCTTGGCGAAACTGGTCCAGAGAGCGACAAAGTTATCCCGCACACGACATTCGTCACTCGACTGTGAAATGTTGGGCAACAGCTTTGGGTTGAACATGTACAGCAAATCATCACCGTGGCACGCACCGGTCACGTTCGCGCT…
GSR_IOB_NIMR_549	scaffold03356-scaffold00024	KB664533	AGAP003790;	TTTCTTAATTTCTTCTTCTGTTTTCTAATTTTACAACACGCTTCAGTGGAATGTAGTAGAAGCGAATTTATTTTTCTTTCTGCAAATAGCACACAATTTCGCCAAATGGCACAAGTGGCACATTTCCATTTTTCCACCATAGGTGCCACCATAAAGCAAATGAGAAAGGAAAGATGAGGATGAGCATTGAGCTGGGATGTGGCCCATACCACGACCAAAACTCCACGAGGAAATGTGCTTAATTTTATATCTTTACACCTTAAGTGGATGCGATTCATTTGCGCGAACGAATCTCGTCAATCTCGTCAAGCAAAACAATTACGGCAGAACACGTGAACGAAACCAACCAAAAGCTACGAGAGCAAACGAGATAAACCCTTTTTTGTGTGTATCGAACTG…
GSR_IOB_NIMR_550	scaffold00051-scaffold00716	KB664634	AGAP005071;AGAP007154;	GCTTGAGTTTTCGCGCACTGAGAAACGAGCTTGTTGTGTGTGCTGCAAATACTGGTCCGGTTGTTCCAACTGGTTGTGCCGTGGGCACCGTGCGGCGTCAGACTGTGGGTACTGCTGTTATTGCCGATGCTACCGCTGTGGCTGTTTCCGTTGCTGCCGAGGTGAAGGTGTGCGTGATTCAGCCCCGTCCCGTTGCCCACGTTCGGGTGGTGATGGACGACCGTTCCGTTGTGGCTGTTTCCGTTTCCGTTCGGCTGATGGCTTAGGCCCGTCTGATGCAGCTGGCCCGTGCTGTACGTTTTGGGTGTTACCGCGGTTCCGAGCGTCGTTGCCAACACTGTATCGATTCCGGCCGTACTAGTGCTCCACACCGACACCGTACCATTGCTGGGGAAGGTT…
GSR_IOB_NIMR_551	scaffold00076-scaffold04611	KB665176	AGAP000005;AGAP000005;	GCGGTCTTTGGTCAGACGTCCGTGTCACGTCGCACGTCACCCGGCTGTCAAGCGCAAGCCCAAACGCGCAACCACATGAAGCGAACTGTACCGAGGTAGAGGTAGGTAGGTTTGCGAGGGTGTGTCGTGCACAACCACACAACCATCATCAACGTCCGCCCGGTTTACCACCCTCCCTCCTCCCCCCGACCCTGTTTTCGCTCGCTTGTACATACCCAGCACAGCGCGTGCCGTGTCTCGGGTGGGTATGACACGACGCGCCGACCGCCCGAGAAACGAAGCGGAGTTGTTGCTTTGTACCGAAGCTGAGCGCAAACGGATAGCATCATACACACCAGTGTCCTGTCGGTTTTCTCTCCCTGGTCCGGTCGGTGTGTGTGTCTCTGAGCCTGTCGAGTC…
GSR_IOB_NIMR_552	scaffold04174-scaffold00127	KB664912		ACACCTTGCTATACCGAGGAGACGCTATTCTTAGAGACACAGGATTACGAGCTTAATTTGAATGAATTGGAAGAAGAAGCAGACGAAGAAGAAAGTGCCGACGAAGACAATGATGGAGCGGATCTGGACGATAAAGACAATCCCGACATTGGTCAGATGAACGGTGAAGAATGTATACGGTACTGGGCACTTGCTGAGCACACGAGTCATAAATCAATACGGCGGCTGTTAAGAATCCTAAATGCGAAAACGGATCTCAATTTGCCCAAAGATCCCACCACTTTATTGGGCACCCTTCGTAACCGTGCAACGATGTCTAATATTGGAGAAGGAAACTGTTGGTACCACGGAATTAGTCATGCTTTAACGAAGGAGCTACAAAAATATACAAACGTACCA…
GSR_IOB_NIMR_553	scaffold17035-scaffold08089	KB664745		ATATGGTTAATGCTTTGTGTGGGTATATGTTGTTTTTTTTTTGTGGCATAATATTTTGATTATGTTTAGTCTAATGTTTGCTTTGTTTTTCAGGTGTTCTATGTGGTGTTTGAATGTTAATTTTCTGTCTATGATAGTTCCTAGGTATTTATATTTTGTTACTTCTTCAATCGGGTTATTTCCTATGATTAGAATGATCTTGTTTATGTTAAGCTTTTTTATTTCTTCTGTGAATAAGTTTAAGGCAGTTTGTAGGTTTATTTCTAGTTCTTGTTGTGTTTTTCCGTTCCCTAGGATAGCGAA
GSR_IOB_NIMR_554	scaffold01145-scaffold00073	KB664488	AGAP004335;AGAP004335;	TTTTTTTTAATTCGGCGAATGCTACACACTCCTTGCCCGACCGTCGTCGTCGATCGAACCGTATTTAGTAATCATCCCGCGCATCATCAGCTACCAGCATTCGAGCTTGAGTGAGTGCGTGTACAAATCTGTGTCCCAACCGACCCACCTACCCTTGCGGCCTCCTCCTTCCACCACCGCTCCCCGGTTGTGTCTTTGTGTCCGAAGTCAAGATGCCCAGCGGACAGGTAGACAAGCCGGTGATCGATGACAACCACGATGGTACGGTCTCGATTCGCTACGAACCGAAAGAGGAAGGTATCCACGAGCTTGCGGTCAAGTACAACGGTGAGCATGTGCAAGGTTCTCCGTTCAAATTCCACGTGGATTCGATCTCGTCCGGGTACGTGACGGCGTACG…
GSR_IOB_NIMR_555	scaffold00040-scaffold02078-scaffold13177	KB664699		CCCCGACTCCGCACGTCCAAACGCATGACCGAGAAGTGAAACCACAGTGGCTGAAAAAATTAAGCGTGGCTTGCCAAGGGATTAAAAGGAAAATGAGTAGCTCTGAGGAGGTATCATGGATTTCCTGGTTTTGCGGACTGCGCGGTAATGAATTCTTCTGTGAGGTGGACGAAGATTACATACAGGACAAATTTAACCTGACCGGACTGAACGAACAGGTACCGAACTATCGTCATGCGTTGGACATGATTCTGGACCTGGAGCCGGAGGATGAAATTGACGATAATCCCAACCAGTCGGATCTGATCGAACAAGCAGCGGAGATGCTTTACGGTTTGATACACGCTAGATACATTCTTACCAACCGTGGCATAGCTCAAATGATAGAAAAATATCAAA…
GSR_IOB_NIMR_556	scaffold00076-scaffold09642-scaffold00847	KB665176	AGAP000009;AGAP000009;AGAP000009;	gtgtgtgcgtgcgtgcgtgcgtTTAACTCGCAGTTTCGTGCTGTGCCCGCGTATATGCGTACGTGAAAAGCAAAATTCGTCCTCCCTTCTCCCATCCAACCCCCCTCGTTGCCACCGCCAACGTGGCTCACTCCCTCGTCACGCATTCCTTCAGACGTGTAGGTGAGCGGTATACAACACCATCATCACTTATCAGTCTCTAGCTGGAGCTGGATACAAACAAAAGCGAAAGAGCAAGAGAGAGAGAGAGCGCGCGAGCGACCACGTATACGCCCGTCATCCGATTTCCGAAGGAACGGGGCCGAAGCGAGCGGGGCAAGCTTCCAGCTTGTGGAGAGCGCCTGAGGGCTGTCGGCATGCGCCACGATGGAGAAAGCGAGACGGCATAACGCATTGCTT…
GSR_IOB_NIMR_557	scaffold00023-scaffold01727-scaffold00878-scaffold23177-scaffold00030-scaffold00004-scaffold00047-scaffold00007-scaffold00036	KB665243		CAGAAACAACAGCAACAGCAGCAGCCGCGAGAAGGGGCAGCCAAACGACTCACCCAACGGTGGAAGGGTGGGGCAGATAGATAAGTGGCCCCGATGGCCGCAGCCCGGCCAAACAATGGCAGCAAGCAGGACAGCACCACGAACCAGCCGATGCAACGCCCAAAGGTACCCCAGCACCACGTACCGGTACCACCAGCAGCGGCCCCATTGGCAGCGAGTCGGTACCCTACATTCTTCCTAAATACTCGCAAACAAGTAACCCGACCACCGGTGCCCAGCATGGTACGCCGGTTGGTGCCGACACCACCGCGCCATCCTAACCCGCCATTAGTCCCGACGGTCGTCACCGGCCACAGCAATGGCGGCGCGCTGCTCATCAGTGCGGATAATCTGCGCCGG…
GSR_IOB_NIMR_558	scaffold00004-scaffold14501-scaffold04289	KB664821	AGAP000254;AGAP000254;AGAP000254;	TATGTTTCTGGCTAGTGTGCGAGAGTGAAGAGAGAGAGAGAGCGGGGGATGAGAGAGAGAAAAAGAAAGCGAGAACGAGAGAACAAGACGAGAAAGAGAGAGGTAGAGAGAGAGAGAGGGAAAGAGCGATGAGGAAAGAAAGATTCATACGCATCCTCCGAGTTCTCAACTCTATCTCTCTCTCTCTCACCCATACTCTCTCTCCCTCTTTCATTATCTCTCTCTCTCACACACACACACGATCAACTCTCCCTAATCACTCCATCTCCTTCCCTCCTTCCCAACCCACTGTTTTTTTTGTTTTGTTTTGCGTTGCCTACGAGCTCCCTAACCCTATGAGTGTGTTTCTTCACTGGCCTATCTGCTGCCTGTTCGCCTATAATCATCTGCGCCTACGAG…
GSR_IOB_NIMR_559	scaffold06278-scaffold00109	KB664419	;	GCGAGTCGTGTGTCCCGCGGCCCATCTCAGCCGTTGTTGCGATCGTTTCTTCTTGACGCCCCTCTCCCTACTTCCCCCCCCCCCTTCCTTCCGGCTGCCCCACTCCGTGGGTTGCTCAGTCAAAAGAGGGGTGGAAGCGAACGGTGGGAGCAAAACAAAACAGCATCAAAAATAACGCCGGAACACGGAACATCACCGCGATTGAACGCTGTGTGGAGCTGTGTGTGAGGATGTAAAGTGGCGTTTTGGGGTGTAATAATTTGCAAATGCAGTTCATGTTGGCGCTTTGAGGCCTGAGTGTGTGTGTGTTGTTGAAGTTTGATAAATTGGAAAACTAAACAACGGATGGCGAGACTAATATTACACACAAACACATTCCTGTAGTTGATTGTGGTTGAA…
GSR_IOB_NIMR_560	scaffold15665-scaffold00056	KB664301	AGAP004196;AGAP011133;	ATAATTTAATGAATGCTAAAATAAAAGAACCATTTACTGTATATTTTAATCCATTATATTCTCACGAAACTATATTTAACGATTGTAATTAGTTACACAACATGTATTTGTAGTACAGTAACGGCTTCTTTCGCTGTCTTTTGCTACACATTTGTTCCATCGCTCCCGTTGTTATGATTATGGCTTTTTGCGCTGGCCCATCTCATTTTGCGTAAAGTCAAGCGTCGAACACATTTCCAAAGCGTATCTGCATGCAACGTAAAGACTCTGCCCCTGGTTTTTCTTTCCCATTTTTTTCATGTTGTTAAAGCATTAGGCAGCATTTTCGACGGGGTTACTGCTAGCACTACAGCGTTCCGGTACGAGTTTGTTAAATGACGACTGGGGCTTACTTCTCTA…
GSR_IOB_NIMR_561	scaffold00005-scaffold00524	KB664289	AGAP011528;	GTAAGACACACGCCCTGCACTCTAACCACTGCTGTACGCAGTCCTCCACATGGAACCCTGTTGACTACCTACTCAATACACGGAAGACACTACTCCTCGATCGCTTTTTACCCTCAATTAAACTTTCTTCTGAATGTATGCTTGTGCAGTTACTACAAAGACACCGCACAAGATGAAGTCAAGTCCGTTCCACATTTTAACCCCAACCATGCTGCGAAATCCGTTGGAAAATGTGAAATTAATTAGCGCACGATTGCTGATGCCCTGCGAGACCTACCTCAAACACCCGTCTCCTTCGCATCCGCCCATTCGTCCGGGTAAACATCAAAGTAAGTTCAGGCTCCCAACCCCCAGCCTCCGCGTGCTCCACCGCGTGGTACCGGTTCTCTTTTATTTGGT…
GSR_IOB_NIMR_562	scaffold02482-scaffold00007	KB664921	AGAP008985;AGAP008985;	CCACACAACCATATGCGCCGACCTGGTCTGCTGTGCCGTTCATTCTGTCCTTGCACGGGGCTCGTGGTGGTGTGGTGTAAATTTGGTTGCTATTTGGAAACAATCTCTCCCTCTTGACGAACAACACCGTTTGGGGAAACGTTTTCGTTGGCAAACAGTTTGCACCGGCCTGCTAGGGACGGAATCGGTGATTTCGGGCAGTGGCAAGCAATTTCGGAAAGAATACCCCATCGTACTCTAGCGCCATTGTTGTGCTTCTTTCACAATGGAGGAAGTGGTGACGATCGAAAGGTTGGCGGAGGAAAAGAAAAATAGCGGCAACGATGAGTACAAATCGAAACGCTACGAAGCTGCCCTCCGGCTCTACTCGGAAGCGATCCACCTGAGCCCCAAAACAGC…
GSR_IOB_NIMR_563	scaffold00058-scaffold01479-scaffold17254	KB665188		GTCACCGTCCGGATACGTCCCCTGAGTGACTCCAGCGAGACGAACTGTATACAGGCCCCGCCGAACCGTTCCGGCTCACTACTGTTCGACGATGGCACACGTAATAAACCGAAAAAGTACAACTACGATTGCGTCTTTGGAGAGGCTTCCACACAGGAAGAAGTTTATACAGTTGCCGTGGCACCGCTGGTCCAGGACGTCCTGAACGGGTATAATGCGGCAGTTTTCGCGTACGGTGCGACCGGTTCCGGCAAAACCCACACCATGCTTGGCCCACACGTACGCCCGGTTCGTGTGAATCCTGGCACGCAAAATTCATCCCAGTCCGGACCGGCCACATCAACGCCCGGTGAAACGCCCGCCAGCCCGTCGGATGCACTGCCGAACGTGGCCGATCAG…
GSR_IOB_NIMR_564	scaffold00523-scaffold03414	KB664288	AGAP007824;AGAP007824;	CCACCTTCCTACCCCAGCGCCGTCCGTTATCGCTCATTCCGTTTTCGATTTCACACCTTAATTTCGAGCAATTGCGCACGATTATCGAAGTATTCCTGGCTCTTGTACCAACAATGACGGTTCGATTTTGTGGTCTCGGCCGAATGTTCGATGAAGATTCCTGTGCTCCTCCACCCCGATGCACGTGGCCTTTCGCTCCTCTCCAGGAGGGTTCCACCACAATCGAGAGTGACCTACTGCACAAAACCATGGGTCACACATTAAATGCTTAAGTATACACATTTAGTCTTGCctctctctctctctgtctgtctctttctctgtttcgctttctcCTCTAAATTGTTTCTTTGTCGTGCCTCGTCTAATGATTACGGCGCCTCTAGTACCACTCGCTTT…
GSR_IOB_NIMR_565	scaffold01124-scaffold00009	KB664451	AGAP012220;	GCATCAACCGTTGTGCACCCGCAGTATCCAGCATTCAGCTCCCACAGAGGTACAGGAACTTGGTACAAATTACAAACAGCCAGAACAGTGAAAGCGTGTTAAAGATCGTTCGGAAAATCGGATCGCTTGATTTGTGTTTCGAGCTTGTGCGTTGAAGTGCGATCGATCTCGACCCCAGGTTTCGACACACGGTTCTTTAACGAACGAAAGTGATCCCGCACCACGACAGCAACATGGTGAAGCTTCATCTCGTCTGTGCCGTACTGCTGTTCGCCTTTCTCGGCTGGGCTCACGGGCTGCCGATGAAGGAGCAGGAGCTGGAGGAGGTGCTGACCAAGCTGCAGGAGCTGAAGCGGCTGAACGATGGCCAACTAAAGCAAGTCAATGAGGAGAAGCAGC…
GSR_IOB_NIMR_566	scaffold00008-scaffold00517-scaffold04123	KB664400		AGCACACGCAGCGAACGCACACACTCATTCGATGCCCCCATACAGGCGAAAAAATTATCAATCACTTTTTGTGTTTGTCAAGCATATTTGCAACCTTCGCTATAATCTCGCGTACGACCGACGTGTTTTGCCGATTAATTAGCGGCATGATAGCGATAAAGATCGCGTGTGATTTGGCAGCGTGGGAGATTTGAGTATCGTGTGTGTGTGTACGTAATTGTGCGTGAGTTCTGTGCGGGTGTGAAATTCACGAATATCGAAATCGTTCAGAAACGGTGAACCTTCATCCGAAAGCAAAAGCAGCCTCCTCGAACCATCTAGAGACGGCACGGCGGAGGATAAAGTGTGAACCGAGCACAGGCAGAAAGGCTTTACATTTTCCAGTGTGTACTTGGATTA…
GSR_IOB_NIMR_567	scaffold00004-scaffold14501-scaffold04289	KB664821	AGAP000254;AGAP000254;AGAP000254;	TATGTTTCTGGCTAGTGTGCGAGAGTGAAGAGAGAGAGAGAGCGGGGGATGAGAGAGAGAAAAAGAAAGCGAGAACGAGAGAACAAGACGAGAAAGAGAGAGGTAGAGAGAGAGAGAGGGAAAGAGCGATGAGGAAAGAAAGATTCATACGCATCCTCCGAGTTCTCAACTCTATCTCTCTCTCTCTCACCCATACTCTCTCTCCCTCTTTCATTATCTCTCTCTCTCACACACACACACGATCAACTCTCCCTAATCACTCCATCTCCTTCCCTCCTTCCCAACCCACTGTTTTTTTTGTTTTGTTTTGCGTTGCCTACGAGCTCCCTAACCCTATGAGTGTGTTTCTTCACTGGCCTATCTGCTGCCTGTTCGCCTATAATCATCTGCGCCTACGAG…
GSR_IOB_NIMR_568	scaffold00050-scaffold00566	KB665199		CGGTAGCATCGTGTTCGGTGTCTTTGAAGCGGACCACGCACATCACGTTCGCGTCTAGTGTGGCCCGTTCGGCCCGTCAAAACAAGCTTTCGCCCGTTAGGGTCTAGTGGAGAGGAAATTAATTTGACCCCCGTGAACCGATTGCCGTTGCCGGAAAACCCGTCGCTTCATTAAACCATTATCCGATGGTTAATTGTTTTAAAGCCAGAAAAAAAGGGAAGTTGCACGAAACAAATCCTGTAGCAAACTCTTCAAGGATCGTTTAATTCCGTTCGCTCTGGTCTTCATTCGCTTGAGTTGGGGGGAATACACGCCGAACAAAAAAAGTCCACTCTCAGCTGCTCAACCATTCCCTGTAGCGTCTGTAGTGTTCACCGTGCTTCAAGCGTCGGTCGACCA…
GSR_IOB_NIMR_569	scaffold04814-scaffold00060	KB664510	AGAP002512	CAACTGTTTGTTTACTTCTAGATTTATATTGTACTGAAATAAAAAAGGAAATCCTTTTATATTACTAAATGGCTGAATATAACAAGGCAAAAATAAGCAAACTGGTCCTGAAGGGTGAAAGTTCCAAAGGCACCAAGCGTAAGCACAAAAAGGACAAGAAGGATAAGGAAGCGAAGCGGGCGCTCGTCGTCGATACGGATGCGGTAAAGCATGGCGGTTGGTGGATGGTCACAAAAACCGGCGACATTACCGGCTCGATTGCGCTCCAGTTTGATAAGCAAGCGTACATAAAGGCGCTGGATAATGGGTTGTTTACGCTCGGTGCACCGCACAACGAAGGTGATCCACCGGATCCGGAAGAAATATTCAGTGCCGTACTGATCAACGAGGAAAAGGTAG…
GSR_IOB_NIMR_570	scaffold03973-scaffold00029	KB664412	AGAP008412;AGAP008412;	ATTTTATTTCCATTTTGCATTATGTTTTTGGCCATTAGTTGTCGTTTTTTCCCGCTGTCCTCAATTGCTAACAGTGATTTTTGCACTACTACTATGTCCTGCACTATGGGAAAGCCATCATACAACGACGTCTTCCAGTCGTTCGCTGCCTACTGTGTTAAGAGAACATCAGCCGTAAGTAGTTGTGTGTGGTGTAGCTTTGCTTTCTACGCTTATCACCGGCCGGTTCTACAGGACACACAAGCGAGTTGTTGGGAGGTTTACTGTGTGGTGGTTGCTTTAAGAGCGGATTCTATTTTTTTTTCTCTCCAAAACTTCGGACATCATGCCCATTCCGTTTGTCAGGTATCTCCAAAGAGGGTAGTAGCAATAAGAAAAAGGGTCCTAGTAAGGATTAGT…
GSR_IOB_NIMR_571	scaffold00112-scaffold01735	KB664877		AAACTGGTAGTATATCCCTTCGCATAACTAAGTGATTTAATGTCGAGCATTGCGAGCGAAAGGGGATATCCCTATCCTCATTCCACTAAGTACAAGCCCCTTAAATCCCTAGCCCTTAAAATTAGGTCATTGGCCGCAGTGACTTCGCATATCTAGAAATATTTCAAGATAAATCCTTGAATGTACAACAGAATCAATGGCAAAACGCAACATCCAGTATTCGTGGCGTTCATTGACTTATTTATTCTTCTCATTTGTTTTTAACGAAGGAACACAGTCTACGATATCCTGCCCGATCTAACGTTACATCCCACCGCTCTGTTTACGCAAATGTCTTGTAGACGTGTGCCATAGAGGTCAGGACCTTGACTTGATCGGACGTTAAGAAATCATAGCTAA…
GSR_IOB_NIMR_572	scaffold01088-scaffold00973-scaffold22629-scaffold02771-scaffold09491	KB664525	AGAP005757;AGAP005757;AGAP005757;AGAP005757	ATTTTGGATTTTTGATTCCAAAGAATTATGTTAAAAAAATAGTAATAAAATGAAAATATTATACAAATAATCAATAAAGTTGATTCAACTGTTCTCATCGAATTGTTGAAAAATGTTTAATTTCCCTGCATGTTTACCTCAAAACTGTTTATTAAATGATTGTACTTAATCCAGTTAATTAATTCATTTCTTTATTTAGTTTTTTATTGATTTAAATTAAACTCTCACACTTCGTTTATGATTGCTCCCCACAGCTTGCAAGCCCCTGCCGAAAACGTGATTGCTCGCTCGGGTGGGGAGAAGAGAAAATGACGCCGGAACGCATACAAATGCAGTCCCGTTGGACGCCACCGTGGCGTCACCGTTAGAGCCACTCAACAACCTGATTCCATCGACACG…
GSR_IOB_NIMR_573	scaffold02277-scaffold00012	KB664472	;	AAAAAAAAAATGCTTCTCAGTGAATATTGAACAAAAATTGTGGACAAAACGAAAAAAGATGAACTGAACTGAAACACCCAGTTTGCTCAACGAACTCCGCCATTTTTATTTTTTCAAAAGGAAGAGAATCCCTCTACCTGTCCAGTGAGATTAAGTTGTCTTCTTCTTCTTCTTCTTAAATCCACATTAATCCAGGTTGATTTAGGTTCCTCTGATTGGCCGTTAGCGACGATGGCCGATCGATAGTTAAGAACGTTTGCAACAATTCAACACTAACATACCTCGAATAGCAGATACAGGATCCTACAGGTTTGATGTTTGGTTAGTCCGTACAAATAGTCCAGATGATGCGTATGTGTGTGCGTGCGTGTGCCATCAGCATTGAAACCCAAAACCCCG…
GSR_IOB_NIMR_574	scaffold00056-scaffold19846-scaffold16708	KB664301	AGAP004188;AGAP004188;AGAP004196;	TAAAAATGTTCTTCCTTATGTATTTTATCTCATTCCTCGCGACTTATCGTATAGAATGTACATTGCCAAAAAGAAATTTCTTTCGCACTCCTACAGCAGACTGCACGAAACTGTTTTCTCAGCTGGTAATTTACATGGCCTTATGATTGATATAAATACGCACAGGCACTGCTTTGCTGCCCCTTTTTGCTCCCTCGTCTTAACATAATCGCCTTCAGTACATTTTACAAAACTTATTCAAACAGAACGTTCAAACGTGTAGTTCGTGTGTAAAATGAGTTACACAGTTCAATTTCAATTTCATTGCTATCGCTAACTGCTCAATACTTATTACACTTGCAACCACGTGCAGCTAAGAAATAAAAGTTTCTTATCACGCGACAGACGCGGTCCTTCTAA…
GSR_IOB_NIMR_575	scaffold00010-scaffold00484	KB664758	AGAP007065	ATCGGTTTAAAACAAATATATAGCAAAAAAAAGAAACATAATCCCTTAAACAAGGCCGCCACTACTACCAGGCAGGCAGGCCGGCCGGGGAACGGTGTCCCCTCAGTTCGCCTCATCATCGATCGAACAGTCGCCCGCCGTCACACTGTGGACGGCTTTCATCAGTATGTTACCGTTCGGTTTCAGCTCCAGCTGAAACAGCGTTTCGTCCTTGATGTTGTTCAGCACGTCCTCCGTCAGCAGCACCTGTATACCGTTCGGGCCTTTCAGCAGCAGCTGCAACTTGGCAATACCGGACGAGGAGGAAATGGGTGAGGCAGGTGACGGCACGGCGGCATTCGTTCCATTGCCGTTGGAAAGTTTACCGTGCGTGCCGGTGCCGTTCGACGCTAGGCCGGT…
GSR_IOB_NIMR_576	scaffold00032-scaffold00169	KB664507		TACGTTTTTTTTTGTAATTTAGTTTCATCCGAATTCGTATGCTTATATATTTCTTATTTGTCTAGCTGTATATTATACTCCTTTTTACAAATTGCATAACCTCCCTTCCATTCGCTTCATCGTAACTATTCACAATAGGTATAATAATATTCTCAAACCGATGTTCGATTTTGCTACCGTTTTTTCTTGCTTTCGTCTTCCTCTTTTTTTTTTTCTTTTGCTCCATCACGTCACGCTGCTGCATCAGTTCCATCGCACATAGTTGTCTTATTGTTGTTGTTGTAGTGTGGTGGAAAACAAGGAAAAGAAAAACAAGGATTTGCTTTGATTTATGCATTCGTGTGGTTGTGTTTGTTCACTTTCCTTTACAACTGTTGCTGGTTGGAGGATTTCTTGTGC…
GSR_IOB_NIMR_577	scaffold02802-scaffold00040	KB664699	AGAP011452;AGAP011452;	TTCCGGCGCCCGGTAGATGGTGCTTTCGCTGTTACGACAAACACACCATTTCCTTTTCGTGCACTGCGCCCTCCGATTTGGAGTTGCCGTTCGGTATCATCACGATCGTCGTCTCCTGGATGTTTATTCGCAGCGACTGCATCCGTTTGCTGGTGTACCGGCGGGACATGGTGCTGGTAAGGGATGTATCTCTCGGTGCCAGATTGTCTCCGTGCCTTCGCCGACTGCTCGAGCTTCCATCGCACAGCAGATACCGATTGAAATGCTTCCGGAAGGCACCACTAACACAGTACAGTGCCACTGGATTGGCACAGCTGTTTGCGAACGACAGGCAAAAGCCTACTATTCGCAGTACGTGCCAAAATCCATTGTAATCCTCGTTGAAGTTTGGATTGTAAT…
GSR_IOB_NIMR_578	scaffold13049-scaffold04527	KB664548		ATGTTCTTGCTAGACGAGTGAAGTGGTTGTGATACGGTTTCGAAGGTATCGGTTGGTTTTTATATCAAAATGCAATGCAACTTTCCAACGACTGAGCCACCCATAGCCAACCCTTTAAAGGTTGGGGTACGCAACGGTCTTAAAAGTGGCTCCAGAGCTACCCACAAAAGAACTTGTTTCGTTTGATTTTTGCGACATAGAGCGTAAGTGCAATAGAATGAAAGGGGACATCGATACAAGCGTGGAAATTTGTAGCCGAGAGGCTCGTGAAAGTTCGTGTGTCGCCATGTTAGCACGTGTTAATATGAACTCGGTTACTCGTAACAAACGAATATGCCAACTTTAGACTATTTTGTATCCCTTTTTATTGAACGAGAATGACATGACCCCTTTTGCCGA…
GSR_IOB_NIMR_579	scaffold00687-scaffold00001-scaffold02230-scaffold01981	KB664484	AGAP002334;AGAP002334;AGAP002334;AGAP002334;	gagtcttttaccgataacgcagaacagtgtgtacgacatacatttgcagcagaacgggaatccggaaccaaaacgagtccgggaatcaaaacgattccggaactggtcggaatcgttctttcggatcggatcggactcatctatatgctggatcggatcggaatcgtgattccgaaccggaccgcccatccctaGTTGTTTGCCAAAAAGCAAGTGTTAAAACGATTTTACCTCCCCTGCTGGTTGGTTACGCTACTGCTCGGCAACATGTGCACCTTCAAGAATGATTTCCTAGGTTTTGGAGCGGGGCTTATGCTACTCAGAATAAAGGGTTTTTGCACTACTACTATAAACTGTTTTATTCCCCCCTATAAACTGCACCAATAATTGCTGCGTTGA…
GSR_IOB_NIMR_580	scaffold02078-scaffold00040	KB664699	AGAP011438;AGAP011438;	TGGCTTGCCAAGGGATTAAAAGGTAAATTTTCGTTCGATTTTTCACCCCAAATCGGTACAATTGGGAAACTCATCTATCGCCGGATATGTTTGCCGCGCGCCAGTGTACAAATTGGCCGTAAAATTTCGCATCCTGGGCCCGCAAAACCGGTCGCAAGGGAGCAGCATAGGCGGCTTTCCTCCGTCATCGTCACCGTCATTTTTTTTTTCGCTCCGCCGTCTCTGTTCGTTCTCGTCGCTGCTTGCTGTGTTTTGTGCGTGTGTGTGTGCGCATTTTCGTACACGCGTTTTTCGTACGGTAGCGGTCGGGTGTTGAATTTCGGTGCAGTTACAGCGGAAGGACACACGGTTGCCGAACATTTGCCAATTGCCTCCCGGAAACACCCGGAAGTCGAAGTG…
GSR_IOB_NIMR_581	scaffold00136-scaffold00598-scaffold00651	KB664510	AGAP006266;AGAP006266;AGAP006279;	GGAGCAGTAACGAAAATTCTGTGCGGAGTGTTTGCTAAAATGTTTAACGCTTCCCGCGAACGACAATCAGAAGAGTGATTCAGTGGTTCTTTATTTTTAACACAAAAAGCAAACCAAGCACAATCGGTTTCTCTCAAAGTGATTTATTGCAAAGTGGTGTATACAGTATTAAGAAACAGCTCTACCCAACCATGTCCAGTGGTGAAAGTAGTGATTCCGGTGACCCATCCAACGCAAGTGCTACACCGTCGATGAGCTCCCGTGAGACAGCGGCCAACGTAATGCTGACCGATTCGGAAAACACAAACAACGAGAACCGTGTAATCGAGATGGAGTCAAATCCGGGCACGGAAGATCCCGAAGGAACTCCTACTCCACCGACCAGGGACGTGGAACAAG…
GSR_IOB_NIMR_582	scaffold01013-scaffold00030-scaffold12482	KB664505		AAAAGAAGTCACAAGCCTAACAAAGATAAATTTATTTTCCTCATAGTTGTCCCAGCAACACAATTCTAAGTTTGTTAAAGTAGACTACAAATTTTATTAGACCGCACATCATACGCCAAACGACGAGAAGGTCATTCTGTCCTTGCTGACAGGACCATTACCTTGCGAACGGAACGGATATTGGATTACATCACAGTTCTGGACAGCGTAGATGTCATGCTGGCCACCTCACTGAAGTATTTCTATATTTTCCACCATGCATTGCTGCAACATAAACTCGAGCAACCACCTCGTGTAAAGATTGATGTTCCTTTGTACTGCCGGTCCCCCCACTCCCTGCAGTTCAGCCCAGGGAATACACAATGTTCCCACGACGCTGGCGACTCTATAGGATACAGT…
GSR_IOB_NIMR_583	scaffold00038-scaffold06093-scaffold05033	KB664509	AGAP013380;AGAP013380;AGAP001410;	AGCGATTCCGTTCGCGCTAGTATTAGTATTGTGTTATCATTGATTTATTCGCTTAATCCGTTTTTCGCTCTTCTTTTCCTCTTTGTCAGCGGTTAATTTCAGTTTTGTTTCAGTTTCTTAGTTTTCCTCTTTTTCCCCCCACCCTCCATTCCTTGTCTGCTCACAGTTTCTCCTCCTGTTCGCTTCTACCTTTCTCGTCCTGCTTATTTGTGTGGGTGTTGTTGCCTTTTTTTTTCTTCGCATTTATCGCATTCACATGTTTACGTTTTTAGTTTTGGTTGCTTTTTTGCTGTTGTTGTTGTTTGCTTCTTTCCTTAGACTTGTTGTATATGTGTGGTAAATGTAAATGTAATGGTACGCAATTTTGTTTCTTTTCATACTTTGTTATTTTCTTCCTTT…
GSR_IOB_NIMR_584	scaffold00089-scaffold00096-scaffold14713	KB664554	AGAP003484;AGAP003484;	GTTCAACAACGCACCTTTCCCGCGCCGGTTTGGAACGGCTAGTCGTACGGAATCTCACTTTTTATCTCATTTATCTCAGCGTTAAAAAGTAATCTCATCATCAGCGTTTGTTTTGTTTTACGTCTGTGTGTGTGTATGTTTGTGATGTAAGGTGAATAATTAAAAAGGCATTACAAAAGGTGGTGTGGCGTTGTGGTGAACTCCGAGTGTCGGATGAAGAAAGCGTAACGTAAGCATCCCGCTTTTCCAACCCCCAAAAAAAGCAGGCCTCCAGAATCCTGCTGGAAATTGATCGCATGCAGCAGCAGATGTTACTGCGTCGTGTACTGTCGCTCTGTACGTTGTAGTGTGGTGGTAAAGGTGTGATGTGAGTTTGTTAGTGACACGTCTCAGTATCAC…
GSR_IOB_NIMR_585	scaffold00076-scaffold04611	KB665176	AGAP000005;AGAP000005;	ACCGAAGCTGAGCGCAAACGGATAGCATCATACACACCAGTGTCCTGTCGGTTTTCTCTCCCTGGTCCGGTCGGTGTGTGTGTCTCTGAGCCTGTCGAGTCTGAGCGCGCATCTCCAGTGCCATCATCAAAAGCAGCAACAAACACCCCCGGGTGTAGGAAGTGTAACCACATATTCTCACACACCGGTCGATACCGTtgtgtgtgtgtgtgtgtgtgtgtgtgtgtgtacgtgAGACTGATGTGTGAAGCAGTGCAGTGTGTGTAACCTTTGATTTACCCGGCATAACCCGGTGGGTGACAATTAACGCAACGCAGCAAACAAACAAGTGATAGAAACACAAGAAGAAGCCGCTGATACACAACATTCAACTGTCCGCAACCAACAACAACAACCGTC…
GSR_IOB_NIMR_586	scaffold03670-scaffold04880	KB664576	;	TGTCGCACAGATAGATATTGGGGAAAAGAAAGCTAGAGAAGCTAGTAAGGATACAATTACATATAACCGAACAGTGTGAACGTGTAGACGCGTATTAAACTGTCAGCCAACAGTACGCATCAGCTCATCCCCCTGCTGGACGGGTAGCAAGGCTGTAGTAGCGTTTGCTGAGCAACACACACACAGCCATACAGAGTAGCGATGGTTTCAATTGGCCGGTTGCCGATCGCAACGTGCCCCACGAAGCGATCAATTTGTACTAACCTTATACTTTCACCCCAGGCCCAATTTTGTAAAGCCCAAATGATCAAATATTTAACCAACCCACTACGATGTACTAGTACGATTCAAGCTCGACCAACGCACAGCAGCACAGCGCGACAAGGCCAATGGGAATAA…
GSR_IOB_NIMR_587	scaffold03290-scaffold03263-scaffold00133	KB664497	AGAP009774;AGAP009774;AGAP009774;	ATATGTTTCGTCTTTTATTTGACATTCAACATCCGTGTTTTTCCAATATATATAGTCTGTCTGCTCTACCATCTCTATGCTCTACTACCACGCACCACAAACTTTGGAACCGTACACACCCAATCAAGGGAAAATTCGCTCTACCACTATCGTCCATTTTCCACACAGTATCCATCCAGCACAGAACATCCAGCCTTCCCTGTATGCTGTCTCTTCAGTAAAGAAGCATGCCCTGTTGGTGGTTGGAATGATTTGGTTCCTGAACATGGTTTGTTTTTTTTAAACAAATCTATATTGATTCCCTTTTTTTTGGTATTCCCAATTCGTATTCGATTACAGTGTAGATTATTTGAAGCAATTCGCGCTTTGCAAAAACATAATATACGAAGCAGCAAACGC…
GSR_IOB_NIMR_588	scaffold00036-scaffold03412	KB664552	AGAP012108;AGAP005408;	TTTTTCACATTTTCTTCACCCCACACACACACACACACCAACACTTCATTTCTTTCATACGTCAAACGAGCGTTTGTCAAAGAGCTTCTAAATTGTTTTGGAAACTTTCCAAACTTTGCTACTGCGCGAGAAAGCAGCTCGTCCGGTTCGGTTGTCGCGTTATTTTGCGTGTGCGTTCAGAGGATGTCGAAGAAACCAACGACGGGCCCGGCCCTGCATAAGGTCATCATGGTCGGCAGCGGCGGTGTAGGCAAATCCGCCCTAACGCTACAGTTCATGTACGACGAGTTCGTGGAGGACTACGAACCAACGAAAGCGGACAGCTACCGTAAAAAGGTGGTACTGGACGGTGAGGAGGTCCAAATCGATATACTCGATACGGCGGGCCAGGAAGACTAT…
GSR_IOB_NIMR_589	scaffold00038-scaffold06399	KB664630	AGAP000073	CTCCTCCTCCCACACACCGAACCTCCCATAGCCCGGTAAAGGAATTGGCTTCGACCAAGCGTGCGAACTAGTATTACCTGCAGATGGCACTATCGTCGGCAGTGCAGACGCTGTTGGGCGCCGCCAGGAACAGCTTACCGCTAGAGCACGCGCACAGCTGATAGATCTTGCCCGCCGTATCAGCACGGGCCGCCGACGATAGTAGGCTGCTGCTACCAGCACCACCACTAGCGCCTCCTACCGTTTGCACCGTTTTCAGATTGGGCATGTAGATGGCGCTCGAATCGAGACGGATACTGCCAGCGACCGAATGTAGCTTCAAATCGTTCAGACAGGTCGTCTCAATACCGCCCGCCCGCGACTGGATGAATATCTCTTGCGTTGCTCTCGCCTCCAGTG…
GSR_IOB_NIMR_590	scaffold07279-scaffold00180	KB664668	AGAP011618;AGAP008144;	CATTTTTATTCCATAATCACTTTGGTTTGCTCACGCGCGTTCGTGTGTTTATCAGTTTTTTGGTGTGCTTTCATCGCTTGACTTACTTTTCCTGCCTTTTCTGTTTTTGGTTTGACATTATACAATTCTAGACTGCGCCCGCATTTACTCACTATGCACTGTTACAATTAGCTCTCGATTGCATTCCCCTTTGCCCCTTCGTTAAAAAGGAACTACAATTGTCGCTTTCAATGATGATGATGTTTAAGGTAATGATACGTCTTTGACACCCCTATCGGTTTGTTCGTTTTCTTTGCAATGGTTTTGGTTTGTTAGAAGTGTACAAAAGATGTGAAACAAGTTAAATAACGAAAGAAGAAGTGGAGCATTAAATAGAAACAAATCGATTCTAACACAATG…
GSR_IOB_NIMR_591	scaffold00005-scaffold01969	KB664289	AGAP007307	ACATACTAATTAGCCCTCATTTATTTTATTTACTCAATTGTTTACACAGATACCAAGCCCCGCAATGTCTCGCATGGGCTGGGCTCTCCGGACTCTACTAGTGTCAGACAATACAAGCTGTTTAAAGGACCGAAAGGTGGGTGGAAAATTCATAAGGAAATGTGCACCCGGCACGGAGCTGGTCGAATGGTTGTTGAATCTCTCACCGATCGTCCACACGCGAACGCAGGCAGCCGGCATGTGGCAGGCACTGCTCGAGGAAGGTGTTCTGTGTCACGTGGCAAAAGAGCAACCGTTCAAAGACAAGTGCTTTCTGTATCGCTTCAAGTCGGACGAGGACGGTACGGCCGGCGGTGCGCCCACGTCCGACGATGTTAACCACGCGAACGAACACATCCG…
GSR_IOB_NIMR_592	scaffold02210-scaffold00055	KB664476	AGAP001382;AGAP001382;	GCTTTACATCATCATTGATACATTTCTATCAAAACTGGCATTAATTTATTTAAACACTACGTTCAACAATAGACAGAAGACAAAAAGCGGTCGTATTGCTCGAATTGATTGTGTTGTGAGGCTCATTTTTCTTTCGTCAGTTTTTTTTGTCCGTTACACTCCCGTATCGTATTGCACTTCTTCATTCATGATAACATGACAGAAATAGGTTGGCTCGCATCAGTGTGTTCGAAATTTACAGCATGATTCCCTCGAACCTTCGTTTCCTCCCGGGGCCACCGGCAAAGTTGGCGACCGCCATCGCCATTCGGTGTTTCGCTTCCTGTGCGCCTGAGTATCCACGCGATAGTCCAAAGTCTACCGTTCGTTTGGAGTTTTCTAGCTCATCTTTGGCACGTA…
GSR_IOB_NIMR_593	scaffold00653-scaffold00071-scaffold00049-scaffold00071-scaffold00653-scaffold00049	KB664861		TGCTGAATATAACGACAAAAAGAGTAAACAAAACTTTGAATGGTTAGAAGAATGTGAACAAGCAGTACTTCAAGTAAAACATGACCTATCAAATGCAATCATGTTACCTCATCCACAGAGTAACGCTAATTATTCTCTCACTAACGACGCTTATAACAATGCAGTTGGCGCGATACTTCAACATCATCTCAATGGTGAAAGTCAACCGTTGGCATTTTACTCAAAAACAACAACACCAACCGAGCAGAGATACTCAACCTTTGATAGAGAACTACTTGCCATTTTCCTAGGAATCAAACATTTTAGGCACTTCCTCGAAGTGAGAGACTTTAAGGTGTTAACAGACTACAAACCTCTAACATTGGCGTTAAAATCCAAGGCTGAAAAGTCTTCGCGACA…
GSR_IOB_NIMR_594	scaffold00977-scaffold00098	KB664777	AGAP008180;AGAP008180;	AGAATGACACATGCTTCGATTTTATTCAACCATCTCTTACTTCCTCCATCGCTctcgttcgctcgctcgctcgctcCGTCTCTATCCAGGTTCCGCGAGTCATGCAAACCGCACACACGGCACAAAATAGGGGCTCTTTCACTATGGGCATCATTGACATTGAACATGTCATTCATTTCTTGTAACGACGAAAAGGGAGAGGGACCAAGAGAAAAAGAAAAGGAATTAAACGAATTTATGATACGCGCTTTACTGTAACAACCGAcagcagcactcagcagcagcagtggcagcagcagcTGAGTAAACCAAAACCGCAACAGTAGCAGCCTTTGTTGGTACGATTTTTTGTCGCATAAAATCTTCGTAAAAGAAGTTCAGTTTTTTTGTGGagaaaaa…
GSR_IOB_NIMR_595	scaffold00006-scaffold01770	KB664288	AGAP007759;AGAP007759;	TAGGTGGATTATTCGTACTGGCAAATCTGCATTTCAACCATCACAACGCAATGGGTGTAGCTAATCATCTGCCGGCACCGCAGGAAAACAGAATCATCAAAAAATTTTCACCCCATCCCTACTTCGACTTCGATGTGCCTCGGAACATAACGACCCGCGTCGGCCAGACCGCTTTCATCAACTGTCGGGTCGAGCAGATGGGTGACAAATCGGTCTCCTGGATCCGGAAACGAGATCTACACATCCTGTCAGCAGGAACCGCGGTCTACACGTCGGACGAACGATTTCAGGTGATACGTTCCGATAAGGCAGAAAACTGGACGCTACAAATAAAGTTCGCCCAGCAGCGGGACTCGGGCATCTACGAGTGTCAGGTAAACACGGAACCAAAGATGTCCA…
GSR_IOB_NIMR_596	scaffold09167-scaffold00008	KB664400	AGAP005632;	CTACACCGTTATCCTGGCATACGAGAGGATTGGCGGCCCCATTTTTTGACACAAAGGAAACCAAAGGTGTGTGAGCTGTCAGTCAGCCAGTGTTGGGACGAGTGAAGAAAAATTTTATATCAATAAATTCGATTGCCCGTTGTTTTTTGCTGCTCCATCGGTGGGACTTGCACGTCGCGATCTCAGCTACAATTGAAGGGGTGTTTCTTGGTGTGCAAAGTAATCCCCAACCAGTCCGGGATCGGTTTGGGGCTTTTGTTGCCCTGTGTCGCTCTACGTGTGCAGAATCGCATTTTCTCGTCCCCACTGTCCGGAAGTACCTAGAGcacacacacacacacgcacgcacgcatacaAGGGGGTGGGTGGATTCCGAAGAGAAAAACAATACCAAAAGTA…
GSR_IOB_NIMR_597	scaffold02107-scaffold00012	KB664621	AGAP008282;AGAP008320;	TCTCTTTATTCAAATGTTTCGTACAGATCCGATGTGAAGTATCTTCTCCCGAGCCTAGCCGCACAAACCGTCATCAATTTCCTTGATCAATCTCGCAACAACGCTCACGTCAAACGGATCACTCAGCCTCATCTTACCGGCCCTCAGTAGCTCGTTGTAGTCGACCGCATTCTTAAACCCGGTCGATGAACTCGTACCCAGGAAGCACGTGTAGAAGGTGTTTGCCTTCTTGCCACTGCCGACGTTCGACGCTTCCATCACACACTTTTTCATGTTGGCCGCGTGAGGAACGCTACTATCGACACGCTGTAGTAACGAAAGCAACTCACTTTCATTAACTTCTCCATTTCCGTTGACGAATCCAACCACCTCCAGAATGCACTGCATGTGCTTATCCAT…
GSR_IOB_NIMR_598	scaffold00132-scaffold00378	KB664444		TTCGTTTTCATTTGCCACTCGCGCGGCTCGCGCCGAGAACCCGAGTCGGGTCTGTTCGGACGATTCATTCCGTAACCTACTTTGCTTCGATACGTACACGTTTTCAGTTTAGCTCGCAGGGCTGGCTAACACACAATTACTTTTCGTGCCGAAAGATGAATAGTTTTCGTTGAGTCAACGAGCAAAGTAGTAGTACCAGGGAGCTTTTCTAATGTTGTCCACGGTTCCTTGTGGTCCTGTTTTTTTTCTTCTTCCTTAAGTACATACTTAAAACAGTGCTAAAAACGCGCATATCGAAAGTCGCCAGATCGATTATCGATGTACCGTCGTCGACTGGTTCGCAGCGAAAAAAGATGTGAAGTTCAACGGACATTTTCTAGCGCATGTGAATATTATTAG…
GSR_IOB_NIMR_599	scaffold00047-scaffold03870	KB665176		GCTTTACGGCCTGTGGATGTACATCATCAAACAGTGTATGTGTATGTGTTTAGTAGTGTGTGTTTGGTTCGTGTGCGTTTGACAAGCGCGTAATTCGAAACGATTTTCCGGCTGATACTGTTCTTCTATCAAACTGGCGGATGCTGCCCAATCCCCTTCTCCCCGCCCCCTGCCTACAACACAACGGCAGCAACAAAACAAAAGCTTATGATTAGTACGAGAACGCGAGGCAAGGCAGCAACACACACACACACACGGTGCACAACAAAAGACTTACTGGCCCGATTCCAACAGTGTACCATACGCGTTAGTTCCGTGCCCGTACGTGTCGCGGCAGTAAGGCGACCACCAAAATAGGCTCCCACGCGGCCCAGATCCTGCCCGCGATGGAGAAGGGCA…
GSR_IOB_NIMR_600	scaffold00021-scaffold00080	KB664449	AGAP010963;AGAP010963;	AACAAAACCCATCCTCCTAATGGAACATACTTAAATTCATTTATTTGTTTGTTAAATAGCTTTGCAATCACTGCATAGTGTTCAATACCGAGCAAAGGGAAATTTTGCTTTATAGCACATTGATCCGTCCATCCGGGTATAGTTGTCGACATCCGGAGGTCCATTTTTTCCAATCTATCTATTTTCCAGCTATGGAAAAGTTAGACGAACCGTAGATAAAGCACCCCTTTTGCTCACAGTTTGCGGTGTGTTTGTGTGTGTGTGTGTTTTTTAGCTAAAGTCCTTCTAAACAATCCGGCATGCGAAACAGGAGCCGTTGTGAGCAAACAGAACCAAATCGGCACCTTAACTTAACTATCCAAATCCAAGAAAGTAGAGTAAACGTAACGTAACAAATTG…
GSR_IOB_NIMR_601	scaffold00043-scaffold04666	KB664766	;	AGATGTCAGCTAGTGTTGTGTGCTTGCGGGCTTGGCGGCATCAGGATATTTTTGAAACAAAATATTTCGTCGAAATGCCGAAAAGACTGTACACCTACTGCTGCCGGCTGTGTCTTCACGATGGGTCGGTGCACGAGCTGTTCGATATTTTTACGGTTGAAGGATTGGGTCGGAAACTGCTCAACATTTTCAATATAAAGATCACCCCTCAAGACGCTTGCACCACCAACATTTGTTTGACATGCTTTAACGAGGCGCTGACACTCGATCGACAGATGCAGTTGTTTAAAAAGCAGAAGCAAACTGTACTTGATAACCAGCAGCGGCTGAACAACAAGGGTCCCGCCGCAGCTACGGCAACAAGTGAACTGTCGTCCGTGGCATCGCCTGAAGTGCCTG…
GSR_IOB_NIMR_602	scaffold00031-scaffold05564	KB665299		ATCATTTATCATAAAGGTTTATTGTTTTTTTTTTCTCATTTTACTTATGTTTTGTCAGCCACATTCTCAGCGTTAATCGCCGCCAGTTTTTTTGTTTGTTATCATTTTAACGATCACGTTTAGTTCTCATAGCTAAAATTTTACGAATGTGTCATTTTGTTGGTTGGAGCCTGTTTAGCTGGCAATCCTGTTATGTAGGCAATTAACACACACTCCATCATCCATCGCTCGTCCCCGCCAGCCCTGGGGGAGGGAGCTCCCCACCTCATGTTACGGTAATGCAATTTTCAATCTACTACACTTTCGTTTATCTAATTGTCGCGATTTTGGGTGCAAAGTTTTCGAATTTAAACAATCTGTGTATGCACTCGCTCATACATGACCAGCTGTTTGCGGGAG…
GSR_IOB_NIMR_603	scaffold06284-scaffold00065	KB664461		GTATTGGAACGCAACCCAGGTTGACGCTAAACCGGCCGAATAACGTGTTGTATCTGGTAGTGCAAAGGGCCCTCCGAGTGATCTCTGAGTGAGTGTGCGAGTATCGAAGTGCAGATTGTTCGTGGTTCCATTTCCGGCCTGCTGCCAGAGTGGTTCTTGTGTGCTACGACCGTCACCGAAACGAACGGACCCTTTTGTCTCATCGCGTCGGGAAACTCCTTCTCCGTAGCAGAACGTCCCCGGCCTGCGAAAAGTACACCGAATCCTGCCCCGAAAGCAACTCAGCGCGccatccaactacctaaccgaccgaccaaccaaccaacGACGACGACAACACCGATGGCTGCTCCTGCAACACCTTCGCGACAGATCCTCTTCGTGCTGGCGCTATTGTTT…
GSR_IOB_NIMR_604	scaffold07719-scaffold00220-scaffold00709-scaffold00209	KB664841		GCATGGTCGTGTACGCGTTTTCCTTTGTGTGAGTATGCTTGTGTTGTGGTTGCCTGTACTCCTCAAGCAAACCAAATGAGGCAAAACAGCGTGTTTCTCGCTCTAAATGGTACACCTCACTTGATCACACTTCCGCGAGGGGTTACAGTGACGTCACAGGGTCGGTCTACACGGGGTTAGTCGAAAACCCAGTTTCCAACCCGAAAATGAGCCGAAGTCTATGCACACTACCATAAACCTTATTCCCCTTTTGCATTAAGCACCATACGTTTGACTGTGACAGCCTTTTGCCGTTCTCCCTTTGATCTGTAGGCAAATTTCAAGCACAAAACAAAATCGAAATCGAGATCGGTCGTTGTCGGGAGTTTAGTTTAGAAAAACCGAATAACAATCCAAACT…
GSR_IOB_NIMR_605	scaffold03434-scaffold00010-scaffold01982	KB664441		ACGAAACCATGCTACTAGTCAATCAGTGGAACCGGGGCCGGGTGGAACATACCAGCGAAACTCCTCAAATTGTGTGTATGTGCTCTCCCAGAGATCGGCCAGCAATTAGGACAGTGTAGTGGACTGTAGTTCAAATCAATTGTCGCATTTTGAGCTGGTCGAGAAGTGTATTTTGTCCAAATAAAGTGTGTCGTGAGGGCCGAGGCCATCCCAACGGTCGGTCGGTTATCATCGCGTCTGCACGGCGCTCGTGCTCACGTTCCAATATGTTCTGTTGTTTATCGTGCTGTTGATTTTGATAATTATCGAACCAAATTTGACGCGCGTAGCGAAGAAAAGAAAAAAAAAAGGTTGAAAAACAAATTGATCACGCGGGCAACGGCCTCACCGAAGACCTCA…
GSR_IOB_NIMR_606	scaffold00120-scaffold06397-scaffold06795-scaffold00384	KB664566	AGAP008537;AGAP008537;AGAP008537;AGAP008537;	TTTGTTGCTCGTGTTGGCTGGCCACACCATACACTCGAAGCACATTTATATGCGCGTTTCGTTCGGTTGCCCCGCAGCTCTTTGTGTGGGTGTCCACGTTCGGAATTGGCTAGTGTTTGTCTGGTCTGGCGTGCGGTAAGATGGTTGTGGGAACGATCGCCCTTGCCCGGTAGATTCGGTGCTGGCAGACAGTGACAGTTGGTTCGAGTGGCCATAGCACGGAGGCATCGTAGCTGAATAGTGCGATCAAGTTAAACGATACAAACTAGCAGCCCATTGTGTACGCGTAAGACATCGGACAGAGTGGTAAGCACACGGCACAGCAGCAGCATCATCACCATGAGCAACGTAACCGTACTGGATGGAGGGTTCGCGACGCAGCTTTCGGTGCACGTTGGG…
GSR_IOB_NIMR_607	scaffold00051-scaffold08107	KB664456	AGAP005313;	GTACTGTACATTTCAACGCAGAAGAGAAGAGTGTAGTACGAGCTACTGCTGTTAATAATAAAACGCGAATCATTGTAAAAACGACGGTTTTATTATTTGGTAACACATTACTTTAACATCCTAACTCATCAATCCCCCTCACACCACAGCTTTAGCGATAACTTGTAACCGTGATCATTATGCTTATCCAAACGAAACAATGTTCAAGCGTAGTGTGTAACAATCGCGGACTAATGCGATATAACACCATCAACTTAACGATAACCACCGGCTGGGCTCAGTGAATACCATCCAAAGGCGAGAAGCTTTTGTATTGATACAGTTCCGGTCCGCCGTAGCCGTAGAGTAGTTTTCCTTTTCCGTTTTCATCGTAGTACGGGTACCTGTACTTTGGCCTTT…
GSR_IOB_NIMR_608	scaffold01605-scaffold01007-scaffold00023	KB665176	AGAP000567;AGAP000567	TGTATATATACATATATTTGAGTATGCTTTCTTTTCTTCGTAATCGCTCCATACTACAGTTCCATACTGTGAAATGTTACAGTTAGTGTTGGTTGTTCGTTTCTCGTTCTTTGTTTGTTCTGTTGCACTTAATCTTCTAGCATTACTGGGCTTAGTGATTCTTTTTCCCCCTCCTCTCGCTTCTGCTGTATAGTTATGTGTGTGTGAGTGTGGGTGAGAGAGATTTTTTCTTCTTGTTGTTGTAATAATTGGTATGCGATTGTTCATTCATTTATCTTAGCGTACTTCGCTAACCCGTTCGAAATCGTATCAAATACGCAAAACAAACCCCTCCACCCCCCCCCCCTCCAACCGCATAAGAAAACTGCCAAAGGTTCAATCACCATCTCCCATTTTTTT…
GSR_IOB_NIMR_609	scaffold00830-scaffold00039	KB664610	AGAP005967;AGAP005924;	AACCTGTCCACCGCCAATACCGCCACCGCCGAAGTATTTGTACGGGATGTGCTTGACTTCGCTGACGAATCCGTGATGTTCGTAGGCCAGAGCGACACCGACCAGCGCCAACGTGACGAGTACAATCTTCTGTCCGCCGCCGATACCGCCACCGCCAAAGTACTTGTACGGGATGTGCTTGACTTCGCTGACGAATCCGTGATGCTCGTAGGCTAGTGTAGCTCCCAGAAGGGCCAACAAAGCAAAGGATAGCTTGAACAT
GSR_IOB_NIMR_610	scaffold00649-scaffold02076	KB664445	AGAP004962;AGAP004968;	GAAGGCAAAAACATCGCCAACGCAGACAGGTGGAAGAAAATGTTAAAGTTCAACAGATATATGAGAAAATTGCTAGATTGATAACAAAATCCTATAAAACCACAAAACCGTTCCTTGCTTTTGTTGCTTACTAGCGTTGTTGTCACTATTGAATTTAATTACAATTTTCATCAGTGTGATGTCTAATTTTCCTTCCTATATATGCTAAATCATGGATCAATCAAAAAACGAACGAACGAACGTAACACAAATACATAACTGATAGATTGAACAGCATCGATCTTACGCAATTGTATTATTAATTTTATCTTGGCCAGCAGAAATGTCCATCATTCCCATTTTAACATTGTCAAAAACACAAACTATTGCTCTAAAACATGATAAAAACTGTTAGTCAAA…
GSR_IOB_NIMR_611	scaffold00013-scaffold11611	KB664843	AGAP001725	CAACAAGCCATACACAGTTTGAGCGGCATTCTGCATTCGCTCGCTGAAAAAGTAAAATAAAACTAATGTGGACATGAATTCTGTAACGCTTCCCAATTCAGACGCATCAAAATTCTGTCGCTTCTGCTTGTCGGAAATCAATCTGCTGAACGTGATTGGTTCTAGTCCGAAGGCGCAGGAGACGCATGGTGAGATTCTCAGGCTTGCCAAAACCTATCTGCAGCTGGAGCTTCGGCCAGACCAGGACTTTCCGAGCGCTGTGTGCGAGATGTGCATCGGGTTGCTGTATGATTTCGACAAACTGTACAAAAACGCACAGGAGTACAGCTATGCGCTGCGGTTGCTCTTGCAAGGCCAGCGCAGGAAGATGGTGAACGATATCGAGTCGGAGATTCCCGT…
GSR_IOB_NIMR_612	scaffold03767-scaffold00578	KB664445	AGAP004968;AGAP004968;	AAGTTCTTACTGTTGAAGAAATACTGTTTTCCTTTTACAAAAAAAACCTAAACATGCTTTCTACTGTTACGGTACTACGATAGGAAATACTAAACATTACATACAGTTATCAGTAAATGTGTGTGTGTGTGCAGGCAGGCAATGTTGTGTGCCCGGCCCCTAGTAGTATCACCATTCGAGTTAATTTAGGCAAAACAAAATCATTGTTAGCCTTCAGTTGGTGGTGCGCCGGCCAACTTTGGAGCGCTTGCTGTGAACCCACCTCACTTCGCTCGATGTAAAAAATCGTGGTGAACAAATCTTAGTAGCCCTAGGAAGAATCCATTTAACGCAAGTCATTTGAAGGCCATCGATGTGTGTCTATGCTTATCTATCTATCCTATTTTGGGTTTGGATTAG…
GSR_IOB_NIMR_613	scaffold01341-scaffold04388	KB664481	AGAP003220;AGAP002787;	CGACTCAAGGAATGAATCACTCAACCGGTCCATTTTGCGACAGTTTTTGTCGCAATACTCGTACAGGGTGCTCCAGAATGCTACACGATCACGAACACATCGACACCAGCTCTCCCATGTGGGAGATGCTAACCGCGCCGCCTGCTACATATAAACATAAACAACGTGCGTGCTCACCCACACACAGTATCGCTGCAAACCCTCCACCGCGGATACGCACGCCGACGCATATTTAACATAAAACAGGGTGCAAAAAAAACAATACCCGGCAAAAATGTTCTGCCCCTCGTCCGGTAGTAGGGGTGTGTTTGTGAGGTCATTTACGCTGAAAGGGGGGAGAATTTTGCTTTTCTTCGTGTTCCCTGCGTAGCTATCTTTGGCAAACCGCTTCCATCTGTA…
GSR_IOB_NIMR_614	scaffold04661-scaffold03180-scaffold12824	KB664444		GGTGATTGTTGCCATGCATTTTCTGTGTAAACAAGTCTCGGCATCTTGCTGCAAAACAGTACATCAAGCTATTCGTGAAATTCTCTACCTACAGAAGGCTATGAACTCATCGTTCGGTTCGGTATAGCACAGACGAATTCGCAATTACTTTCCCGTCACTAATTATCATCATGTCATACGAAAGCTGGCTGGCATTGGTGAAAAGTGCCGATAAATCGTCCATCATACATGGAAACGTACGCAAGGTGCACTATCGGTTTCCAGATGGTAGGGAAATGGCTGAGGAATACAGTACCGATACTGGAGTGGTCTTGAGACGTGCATGGAAAAATAAGACAGTTTTAATGCAGAAAGAGGAATGGATAATTGAGCTTGGTGAATCGATACCTGTGGGATTGA…
GSR_IOB_NIMR_615	scaffold01744-scaffold00431-scaffold00004-scaffold11743	KB664448		GTTAACACATCGGTCGAACACCCGATGACCCAGTAATTCCTGCGACGTCAGCTTATGTTTTGTACGGGACCGCCAACAGCGTCGTCAGCTTATGCTTCGCACCGAACTTGCACCAACATCGTTTGCATCGAATGGCTTAGCAACCGAGAAGCTGAATCAGCACCCCCTCCATTTCCTGTTCCAATCCAATTCCCCCAATCCACATACATGTATCAATAGTTCAAATAAATCACTCTTAATTTGACCAGCAGTAAAACCAGACGTCTTAAGTGTATATCCGCGTCCGAACCTTTATAAGTGTAAAGCACAATTTTTAACTCGTGCAAGCAGTTGTTCAAAAGCAGCCTATGAGGCAAACGTTCGACCCGTCTACCAGCAATCAAGTGCGGAAACACATCA…
GSR_IOB_NIMR_616	scaffold00024-scaffold11370-scaffold07635	KB664533		CAATTCACGACTTTAATTTATTCAAGTAATTCCTTTAACGCATCCTCAATTCCCAGCTCAATCACACCCCGCTCTCTATTGCTTTTCACTGGCGCCGCAAACAATAAAGTGCTATTTTTTTGTTTTGTTTTTCTTTGATTATTATTGCTAATCGGTTTTTGTTTTTCTTTTCTTCAAATCCATCGCAAACTATATTTTTTATATATATTGATTCCATATAACTATTATCATTATTCAACCTACTACTTCCGGATTTTGTGTGTGTGTCTAATCCATCGTTTTTTACCTATCGATTTTTTCTAATGCTGCGTCTTTCCCTCCCACTGGCAGCAGTGGGGAAGAAAAGTCGGCGACACAAGTCGGAAGAAAATAACGTTAAAATGGGGCTTTTCCGCTGGT…
GSR_IOB_NIMR_617	scaffold00173-scaffold00658	KB664624	AGAP003735;	TTCGGCACAGTAAAGACAGAATAGTGCCATGGAGCCGCTACGCCCAGCTAATGAGCAAGAAATACGGCAACTCATTCAAATCTACGAAAGCAACCTTCCCGAGTCTGTGCAATTTATGTTAATCTTGCAAAACATTTTACGCCTAAAAACAACAGTTCACGGTCCGGATCTAGACGGGGTCTCGCACAGACTCCGCAAAACCATCTACGTTCCGAACAAAGACACTTTTTATCATTTTGCAACATTTGTGGCCATTAGCCGTGAAGATTACTTATACGTTATGGCCCACTCTCTCGAGAATCCTCCCCTTGAGCTATCCAGTGCTCTTGAGAACACAAACCTCATAGACTGGCGTCTGAAGCCTACGTTTATAATCGGTGGGGCGAGTATAATTCACGA…
GSR_IOB_NIMR_618	scaffold02029-scaffold00177	KB664770		AGGTCCTTCTTTCGGGAGAAAGGATCACAACGTCACGATTAatatatctatatatatatatatatGTTCCTTTGTGGTTTGAGTTCACGGAAATTCCCGTGTGTGCCCCCCACGCACGATTAGTTTTGCTGGGATCCTCTCATAATCGTATTCAAAATATATATATCTTCGGAATCGCCGTGGATGATCACCATCGAATGAAGAGAAGGTGCGGGTTGGTGAGTATGTTTCCTTTCCTTTTTTGATTGCAATGCATGTTTGGCCCTTTTTTCCGGTACTACTTCCGGTTCGATCAGAGAGATACTAACGATGAAAGAGGAGGCTGTTTAAGTAAATGTGTGGTGTTTGGCGCAATTCCTGCTGCGATGCGCCTAAAACGATGCAATCAGCATCACTTAA…
GSR_IOB_NIMR_619	scaffold00001-scaffold00613	KB664600	AGAP003146;AGAP003146;	AAATAATTAATGATCTTCAGCTTGCATGCCACAGTAAGTTACAATCGCTCATCGCTGCAGTTTTCCTTTCAGACACTGTATTTTGTCGTGTCGGTGAGTGAACAAATATGCCAACCCCCAAACCCCCCCCCCCCCCCCCCAAAAAAATAGCACTCTCGCGCGTATTTACCTATCTCTCGTTCTGTCGTCGCACTTGAAACAATTTTTATTTTGTGCGCGCGCATAATTTTTTTTTCGTCCACATGCAATCCTGTCCATCGCTTGAACAGGAAGGTTCGCTACACTCTCACAAAATCAGGAGAAGACTTGGTGCGTGGCACTCAATCCAAACGGTCCATACAAAAGCGGCACGACACTCACGCTGTACTCTGCTGCTCGATACAGTGTGTTCCTGTTTCG…
GSR_IOB_NIMR_620	scaffold00032-scaffold01540-scaffold19043	KB664565	AGAP012757;	ATCGCGGATCGGTGGTGGTAGTGGCGTATGCGTCCAACCCGGAGCGGCAGTGATAGTCGTGTTGCTACACCGCTGTTGGCTCACTCTCGTTCAAACAGCGCAACCGATCGCACACGTCTGCTGCTGCTGCTGCTGCGCGCGCACACACAGGCTCCCCAATCTGGGAAGTTAGGTACGGCAAACCGATCGGTCGGGTCGCAATCGTTGACGACTGATCCCCCCGGTATTCATTTGTTCAATCGGTGCGAGCGTGAGAAGCCCACGCGCGCCAACAACAAAAATAAGTGAGCCCCGAAGTGAGAGTGAGAGCTGAGTCGGTGCAAACAAAAAAAAAAAAGCCGAAAGTAGGGACGGTGAGACAGTGGAAAAGTCGGTGGAATCGGGCCATTTGGAATCACC…
GSR_IOB_NIMR_621	scaffold02794-scaffold00028	KB664499	;	GTGTGTGTGTGTGTTGTACAAAGTGTAGCCCGACTGGCACTCATTCCGTGTTGCCTGATAGGCACTCGTCGCGTCAAACCGAGAAGCTCAACAGAAAGTTGAACAAACGATACTTAAAATACAACAAAAAAACAGTGGTAAATGGTTGTGTCATAATCAAAACAGAACAAAATATTAAAACATACATTAACAATGTTAGCTCAGTTAGCAAATAagcagcagcagcagcagcagcaTGCTCACGGAAACTGTTAACAGTTTACAGTTAAGTGCATGTGTGTGTGTGTGTGGCTTAGGGGGAGACTTAGTAGTATGTTTTTAATTTTTGGTAATTGTAAGCTTTTCGATTCAACCGTTTTCGGAAACTTGATCTTGAAGAAACACACAACACAACAGTTA…
GSR_IOB_NIMR_622	scaffold00588-scaffold00047	KB664910	;AGAP028093;	CCGACGTTTGGCGTGCGAGCTCGGCCAAACAGGCAGCGCGATTGAAGCGATGCGCGAACCATGACCAAATCTAGATTAAACCACCGAACCGTTCGCGACTATTCGCTTTACCTAACGCTACCCGTCAGTTGGATGGGCCGGGCGGTGAAGGACACACACACACACACACATTCCGATGCGTTTGATTTGCGAAGACTTTTGCGTGTACATGGGCTGTTGGATGTGTGATTTACAATGTGAAAATGATAATGGCGGGAGAGGTTAGGGCACACACAGCATGGCGTTGCTCCCTCGTCCAGATCCTCGCTGATATGCAAGTCACCGGGGTACGCATTTCGGGACTCGAAACAAGAAAGAACGCAAGGTACGTGACTATACTGTGTGTTAGTTCATGACCAC…
GSR_IOB_NIMR_623	scaffold07401-scaffold00105	KB664453	AGAP010258;AGAP010258;	GTTTGGCTGGCCGTCATCAATACTGGCAACATCAGTGAACAGTTTTGTTTGTCCTGCTTGTCTTGCCTGTTTCGGAACCAATCTTTTCGCGTTCGGAGTGTATGAATTATTCGTCATATACATGAAAACGTAGCATTTCTTTCCAATTTGAAATGACTATAGCTATGAGAGTGGTGGCAGCAATTTGAAAGAAAGCAGCATAAAAGGCTCATTAGACAAAATCCCACGCCAAGCGAGTGATTGTATGTGTGGCGCGTGCAAATTTACACAGATTAACTAATTCAACTGCAGCCAGAAGCTTGAACAATGACACAAATGGCTCAAGAGGAAATTGTCTCGAACACCAAAACGGTCATGCAGGGCTTGGAAGCTCTTCGTGTAGAACATGTAACTCTGATG…
GSR_IOB_NIMR_624	scaffold00490-scaffold00040	KB664699	AGAP011414;AGAP011414;	TGATGGCACGTACGTTACACAGGTAAAACCGGAAGCATGGGAAAATATTAAACACACGAAGTTGCACACGAAGCGCAAGTAATGATAATTGAATTTTCATCCAACCACCACCATCCACCACCATCATCTGCGAAGGGTTGAGCGTGTAGTTGAGGGTTAGCCCCGGATAACGTAATCAAACATCGACCGTGGCAATAGGCAATGGTGTAAAGGGTGCGCGCTAGTGCTTTCTAGTGGTTCCCGCAGCGGTTTTCACATCTGGGGTGTGGTGCTACGTGGAAAACAAATCAAACGAGCAGAAATCAACCATCAAGACCGTGTGAGAAGGAGAGCGAACGAGAGCGTGCTCGTTCGTCGAAGGAACGTCGACAAAGGAACGGTGAAAGATGCTTCGCAATT…
GSR_IOB_NIMR_625	scaffold00008-scaffold00517	KB664400	AGAP005619;AGAP005619;	gcagcagcagcagcagcagTGTGAGTGCGCTGCGTGTGTGTGTTTTTTTGCCTTCCCTAACCCATTGTGGCGAAGTATAGATTGTGTAAAACGTTGTAGTGATTAGGGTTACAAGCAAACCAAATAAACACACACAGAAAAAAAATCGTGAAAAAGTGACCGAGTTGTGAGTGTTCTTGCCATGGAACGTATGGAGGTGGACGATTCGGCCGTGGTGGATCTGAGCCTCGGTTCTGGCCGCTCTTCGATCACGATCACACCGTCCACGGCGCGTGATTTGCGAGCGCTGGCGAAAAACTCCGGGCTTACCATCACCCCCGCCCTACCGCCCGTCTCATCCTCCCATGGAGTCAATCCGGGTggaggaggaggaggaggaggCGGCGGCGGCGTTGGTGG…
GSR_IOB_NIMR_626	scaffold01927-scaffold00003	KB665376	AGAP003790;AGAP003790;	GTTTTAGTGATATAAGCTTCTATAGCTATCGGCTGCTACCCATTTTTGAAAAGCCCTACCTCCGTCGAGTGTGTACAGTTGATTCTAGGTACAAACAAACCACACCGAAACCATCAACAAAATGAGCTCGCAGTATTATCCATTCCAATGCACACCGACCGTCTACCCGGCCGATCCGTTCGATGCCAACGAAGATGCGGCCACGCTCCGTACCGCGATGAAGGGTTTCGGTACGGACGAGAAGGCCATCATCGAGGTGCTGGCACGGCGCGGTATCGTACAGCGACTGGAGATCGCCCAAGCGTTCAAGACCTCCTTCGGCAAGGATCTGATCAGCGATCTGAAGTCGGAGCTGGGTGGCAAGTTTGAGGACGTGATACTGGCGCTCATGACCCCGTT…
GSR_IOB_NIMR_627	scaffold00006-scaffold00177	KB664417	AGAP008144;AGAP008144;	CCTGAGACTTCGCGTCCTCTCCGGCGGACACGGCGTAGCGTTGTGCGTTAGCTTAATCCACTACGAGGTCTTGCTCATAGTTCCGCGGCGAACCCGTCCGGAAGGCCCGCGCAGCTCGATCCCAGGTGGGAGTCCAGCGTGGGCAGATGAGAATCGACAGATTAGTTGTTGGCCCCGCTCTAATGCGCACACCGATCGGGTCTATGTGCGTTCCAGTCTAGCGTACACCTCCGGCAAAAACGGCCCAACACCAGCTTGTCGAGCTGCTGAGCGGTGGAGACATTTCAATACTGAACCGTGATACACCATCGTCACCGGAGTGTGTTTGTCTTAGCCGCCAAAAGAGACAGAAAAGCGGTACGCCAGAAGTGGAATTCAGTGCAACGAACCTATCCTAAA…
GSR_IOB_NIMR_628	scaffold01881-scaffold00105	KB664453	AGAP010268;AGAP010268;	TGTGACAATTTCGGTGTGAGAAATGTGCAGCCGCGGGCTGCTTGTCAAATATTCAGAAACAATAACAAACCAGCCAACGTGCTCTGCACTCAGCTTGCAGTGTTATTTAATAACTGTGCCGGCAATAGAATTTAGTAATGTTTTCACTTCTTACCCGAGGTTTACGATCCACACTTCCTAGGCAAACGCGCTGTGCAAATGCGGCGCTTATCCACTGTTCGGCTGTTTACAATGCCGAAGATGTGGCCAGTGTGCAAAAGGCCAAGATTAGTAAGGCAATGAAGGCTTATTTGGAGCGGGCAAAAGAGCATGAAAGCTGTATGGAAACAGCCCGTTTAGAATATAAGCTGGGCAAGCGACATTTGGCCAACATGATGGGAGCGGATGTGGAAAGTTTCA…
GSR_IOB_NIMR_629	scaffold02776-scaffold22199	KB664899	AGAP013057;	CATTTCTTTACAAACCAAAGTTCGGTAAATCTACTTTATTCACGCAAACATTCGGATCGTACAAATGATTTACAATTTCAAAATAGTGCTTCCTTGGCGGCAACTGAACGATAACTGAATGATAGCTCGCTTGTGCATCGTTTCCTCTTCCTCCCACGGAACCCTTCAATTGTTTGGACCTTTACAGGGCTCCGCCTCACGATGACATTTCTCCTTCTACACTGTCAATTTCGGTTCCAACATACATGAAACTTGTTAGAAAAAAAGGGAAGGAACCCGTGCCTCAAATTGGATGAGATTTGCTGATATAAATATGGCGAACCCTGTTTTATTTATAAAACTGTTACTGCAAAGCACGTTGAACTTAAAGCAAAAATTTAAGACAAAAACCACATTTTT…
GSR_IOB_NIMR_630	scaffold01927-scaffold00003	KB665376	AGAP003790;AGAP003790;	GAAACAGAACAGTAGGGAGTTTTCCTTCAACGCACAACAAACACACAATCTTACTGATCCTGGTTGTTGTGTGTAGCTATCGGCTGCTACCCATTTTTGAAAAGCCCTACCTCCGTCGAGTGTGTACAGTTGATTCTAGGTACAAACAAACCACACCGAAACCATCAACAAAATGAGCTCGCAGTATTATCCATTCCAATGCACACCGACCGTCTACCCGGCCGATCCGTTCGATGCCAACGAAGATGCGGCCACGCTCCGTACCGCGATGAAGGGTTTCGGTACGGACGAGAAGGCCATCATCGAGGTGCTGGCACGGCGCGGTATCGTACAGCGACTGGAGATCGCCCAAGCGTTCAAGACCTCCTTCGGCAAGGATCTGATCAGCGATCTGAAGTC…
GSR_IOB_NIMR_631	scaffold04289-scaffold00004	KB664821	;	GATGGCAGCACTTTTTCTTCAAACATGTGTATGTGTGACTTTTTGTTTTTCGTTTCTTTTCTTTACTTTTGCAAAAACCCGTTTTGCACTTTACTTTTGGTTTCTTTTTCTAGGTATTTTCGTTTGCTTTTGCTGTTGCTGTTTGGTTTGTTTCCTCTCATTGGTTTACCTTTTTTTTCCGGTGTGGTTTTGTTTTGTTTCTTCAGAGTTTGCGGTTTTTCTTTCACTAAACGCCTAGATTCATTATACGATATAAGCTTACACACGCCTTGTTGATTTCTTCATTTTTTTTCGGTTGTTTTCTTCTTTCTGCTTTGCATAACTTCTTCTGCGTATTAGTTTCGATTTGCTTCCATACTTCTTATTTTAGGTTTTTTTCCTGCCTTTCCTGTGTAATTG…
GSR_IOB_NIMR_632	scaffold00008-scaffold00517	KB664400	AGAP005619;AGAP005619;	gcagcagcagcagcagcagTGTGAGTGCGCTGCGTGTGTGTGTTTTTTTGCCTTCCCTAACCCATTGTAAAGTGTATTTTTATTGGTGAAGAAAAGCGTGGCGAAGTATAGATTGTGTAAAACGTTGTAGTGATTAGGGTTACAAGCAAACCAAATAAACACACACAGAAAAAAAATCGTGAAAAAGTGACCGAGTTGTGAGTGTTCTTGCCATGGAACGTATGGAGGTGGACGATTCGGCCGTGGTGGATCTGAGCCTCGGTTCTGGCCGCTCTTCGATCACGATCACACCGTCCACGGCGCGTGATTTGCGAGCGCTGGCGAAAAACTCCGGGCTTACCATCACCCCCGCCCTACCGCCCGTCTCATCCTCCCATGGAGTCAATCCGGGTggaggag…
GSR_IOB_NIMR_633	scaffold01325-scaffold00016	KB664504	AGAP001410;AGAP001410;	CGATCGACCGATTCCCATCACAACGGTCAGCGGAGTGTTGGGCAAACAGGCCAGCCTACCGTGCGACATAACGCCACTCGAGCGGGACGATGCCGTGTACATGGTGCTGTGGTTCAAGGAGGACGACAACGAACCGCTGTACAACTTTGACGTGCGGGGCCGGCAGGTCGCCCAGGCACGGCTTTCCTCGTCCGACAAGTACTTTGGCAAGCGAGCCTTTTTCCGGGCCACCTCCCACCCGGCCCAGCTGCTGGTGGACGAGATCAAACTGTCGGACGAAGGGATAAGAGGGAGGGTACTAAGCGATCTGCCACCGGATCGGCCCATCATCTACGATTCGCGGCGCCGGGAAAAGGCCAACACGGTCGAACCGTACAGCGAGGGCAGCGACATTGCGTT…
GSR_IOB_NIMR_634	scaffold00089-scaffold02217	KB664508		TTTCCTTTTTCTGATAACGCATAATATGCATTTATTGGTTCTTTTTTGTGATGTTGATTCCAATACCGGTACCTTCCCTTAAGGGCAGATATCGTGCCAGTATCGCCATTTACACTAGCAGTGTTGTAAAACGATACGGTTTGAAAATTAAAACTCACCTGAAACAAAGTCGCGAGACGATTCGTGGCGCTACCTTTTGCAGCGGGAGAAGTTGACCCCTTTAAGACACACGACGCGTTGCAGTATCTGTAAAACGAATAAAATTCTATTATTAAGTGCCAACAATCTTCATGCGAGACTATCAGTACGGTTAAGAAGCAAGTTGTATCAGAACCATTTGAATGCGTAGGAAATAATGGGATAAAATCTTTTCATATTTCGTTCAAAGTGAGCTGAGTA…
GSR_IOB_NIMR_635	scaffold02861-scaffold00111-scaffold14580	KB664510		ATGGCAGGCGTCGGCAAGTCCTGCCTTCTGCTGCAGTTTACCGACAAACGGTTCCAGCCGGTGCACGATCTGACGATCGGTGTCGAGTTCGGGGCCCGCATGATCACGATCGACGGCAAGCAGATTAAGCTACAGATCTGGGATACGGCCGGCCAGGAAGCGTTCCGGTCGATCACGCGCTCGTACTACCGCGGTGCAGCCGGTGCACTGCTCGTGTACGACATTACGCGCCGCGAAACGTTCAACCACCTGACGACCTGGCTGGAGGACGCCCGGCAACACTCGAACTCGAACATGGTCATCATGCTGATTGGCAACAAGAGTGATCTTGACTCACGCCGCGAGGTAAAGAAGGAGGAGGGGGAAGCGTTCGCACGCGAGCATGGGCTGGTGTTTATG…
GSR_IOB_NIMR_636	scaffold00017-scaffold06964-scaffold17799	KB664555	AGAP008467;	AGACATAATACTGCCCCCTGGTAAGCCCCCGTCGCAGACGAACAGTGTTTAACAGTGAAGCGGGTTGCGAAGAGCTTCAGCAGCAGCGCAGCAGCAGCTCCGGCTCCGGCAGCACCAGCAGCAGCATCACCAGCAAGTAAGCAGGCAGCAGCAAGCGGTGCAATTGAAATAATTTTGCAGAACCTGTAGCCGCGCGACCAAGTGTGCAAGTGCAATTTTATATTTCCCAAAAATCCCAACCACGCGCGTGAGTTCCTCTCACTACTACCACACAACACAACAAAAAATAGTAATGCCCAGTGAAAGAGTGCGTGTGTGAGATTGCAAAGTAAAAAAATGCGTGTGTAGTGAATTAAAAGCGAATTTTTATTCGAGTGCATAGTATTTCCATTTTCCACC…
GSR_IOB_NIMR_637	scaffold01844-scaffold00012	KB664621	AGAP008320;AGAP008407;	TCACACACAGCTTTCCGGCACTCGGTTTGTCATTAGGAAGTCTTCAATTCCTTTCAGGTTGATTTCCGCCTCGGAGATCTCCTCGTCCCGGTACGAGCTGCCGGACGCAACGATGATGGGCTGATGGGCGTGATGGTTGACCTGCTGATGGTAAAACCGATCCGGGCCCTTATCCCGACCCGCCTTGTCCGGTTCGCCCTCCAGCGGCGAATGCGCAACCGTGTGCTGCTTGATGGCAAATGCGGAACCGGACGAGTTGATCGGAATCAGCTCCTCCTGGTGTATGTCCGTCAGTCGTGGATACGGTATCAGATCGGGATCCTGCTCGTCGTCGATAGTTTCGACCTTGGTTTTCGTTTTGATGCTGCTCCCAACGTTGTTCATCCATTTGGTGGTTTT…
GSR_IOB_NIMR_638	scaffold00127-scaffold04309	KB664442	AGAP004805;AGAP004805;	TGTTCTATATAAacggccaggccgttcttcatgaataaaaaaaaaGAACATAAAAATTGTAATCTTGCAACCGTTCAGATTTTATGTGCTGTGATGTTTGGCGTGTTATCTGGTGTGGCGCTCGCTCCAACGCAGCTCACAAAACCGAGTTGGTACCGTAAGAAAGAACTCTAAATGTTGTGCATGCGTCGTTAATGTTCGGTGGAATCAACAACAGTGAAGTGCTCTGTGTGTGTACCGTTTGTGTTGAGATGTGATTTAAGGAAGGCAGGAAATGTGCCGTCTCGGTGAAATAAAAAACGGATGTGAAGCGAAATGGCGAGCAAGGGCCACGAAAATGTTTGAAGAATCCGGTGTGTAAGCAAGGCAAATAATAAAATGCACAACATAAAAGCATTA…
GSR_IOB_NIMR_639	scaffold00025-scaffold16009	KB665288	AGAP008503;AGAP008522;	CAAAACTGTCAAACAGGTTGAACAAAAAGAAGCGGAGGAAAAAGAAAACAACCCACCATCAAAGCAACTTGCAGCTTCTTGTGGAGAACGGAAGGAAAATTCGCTCACTGTGTTTCTAGAACAAGTTTCTGGTGCGTGTGCGGTGCATTTTGGGATTAGGGAAAGCGTAGCTTTAAGAAACAAGCCCTATCTCTAAATCCTGACGACGAAGACCGAGTCGCAACGTTGCAAAATTAAACGAATGAGCGACGGTAAAGTTAAAAAAGACGCAACTAACAAAGAAATTATCACGATGAGTGACGCTGCCGGATACCTGGACCGTTTCGTCGGCGATGTGAGCAAAAAGTCGGCCACCAAACAGATACTGATCGGTGCCGGCAGTGGATGGGCAACCGGTTA…
GSR_IOB_NIMR_640	scaffold19467-scaffold00005	KB664289	AGAP007325;AGAP007325;	ACATTACTTAATAAAAAAGTAATGACAAAGTGAACACACACGCACACACACACTCGCGGGCGCATGCATTGTGTGTGTGTGTTTCATCAAATCTGCACACGCGCATCATTtctctctctctctctctctttctcGGTTTCTGCGTCCATCTATATATATATATACCTTTCGTCTTAATCCTTATCATTAACCACACCTGCATGTATGTGTTCGCGCTCTGCGTTTGTCCTCTTGTCGAGTGCGTGCGTGCGTCTTCGTCAGCGCACATCCTCCTCCTAGCATCTTAGCGACGGTCGCGAGATCCACTGCGGCTGCGACGGTCGCGATCGCGCTCACGGCTCATGCTGCGGCTGCGGGATCTGGAACGACGCGGTGAGCGAGATCTGTACGAGCGGCGGG…
GSR_IOB_NIMR_641	scaffold00245-scaffold00002-scaffold01903	KB664623	AGAP001761;AGAP001761;AGAP001761;	CCCTCGAAACAGGTTTTCCTTTATTCTTTAACTATTGGCTCACTGTTTTACATTGCCATCTCCCTATCCCAGGGCTTTGCGATCTGCGGTATCCTACTAACGCTTCGGCACTTTTCACGCTGTTCCCCTTCTAGCGACCTACGGGTGAAAATAGAAGAAGATTCCCTTTTGTATGCTTATTACACGTTGTGAACATTTATCTATCAAGCGCTTGGTAAGATGATATTTAACGCTTCCGTTTGGATCGTTCGTCATCGTTCGGGAGCGCAATAGGAAAAGCTGCAACCCAGCCAACCAGTGAAAGTACGAACAAGACGCAGAACAAATGTGGTGAATGTTGGCTGACCAAGCCAGGACCAGCACCGTTGATTAATAAATGTTAAACGGAACACGCGTAGA…
GSR_IOB_NIMR_642	scaffold00032-scaffold05098-scaffold19041	KB664521	AGAP011133;AGAP011133;AGAP011357;	AGATTCCAACACTCATCTTGCCAGTTGCCAGACAACGAGACCCCTTTGATGTCTTAAAACGAGCTTCTCTGCATACAAGACCCTGCGGATCCGAGGCCTTGTTGACGGACCATAGCATAAAACCATTTGTTTTTAGATTTTACCTCAAATCGGTTCGTAGCTCCCACGTCCTTTCCCATTTATTAACATGTATTCGCTTACAATTGTTCACATCGCGATTGTTTTAACCAATCTAAACTTTATAGACACACATTTACCATACAAGCTCCAATTTTAAGTATCGCTCTCACACTATCTTGCCGTTTTGTTTTTGTTTACAATAACAATAAAGATTTTGGACAATTATAACTGGCATAACTGTCGCTGTTACCCAAAGTGGATGAAAGTTAGTTTATAAAT…
GSR_IOB_NIMR_643	scaffold00111-scaffold10848	KB664422	AGAP005352;AGAP005352;	AGCAGGGTAGAGAAGGGCAGTGCTAAAGAACCAAGAAACAAGACCACGGGCCGAACAAATTCCCATTTGCTTGTGGCTGCAGCCGTCAATTCGCCAGTGGTAGCACAGATTAGGGGTACAAAACGACAACCCGCCCATAAATACACACAGCCCGACAACAGCATTTTAAATATCCGCCGATTGTGCGGCGTCCCGGTACACTACCTTGCGGCGGAGTGGAAGGAAAAGGGGTCCGGGGAAAAAAAAAACAGTGGCACTATCGATCGGGGGAATATCCCGAAAAGGAAGGTGTTCGATTTTGCGACCACGCCAGCTGCTGCTGCTGCAACGGGGGCTGATAGTTACGTTAGACGGGAAAACCCCGTTGTGTCCGATCGAAGTGACAGAACAAGGGCGTCC…
GSR_IOB_NIMR_644	scaffold07771-scaffold13068-scaffold23425	KB664724		CGCGAAAAGCATGTAATGGTTGGGTATGTTACCAACGGATACAAAGTCTGGAACCCGAGAAAGAGAATACTGTTTACGTCGCGGGATGTTGTGTTTGATGAGAAGATGCATAACACAGGACCAATAAGGGCTTATTCTGATCCTGATGAAGACACAAATAATGTACCGGATGATGTATCTGAGCTCTCGGATTACTCGTCGGCAAAAACCAGCGAACAAAGGAGCGATTCCGAAGACGTATCTACTGATGAAGGCCACGATAACGTCAATGACGCGCTCCCTTCGCAACTTAGTAGTGGACATGGCACTCCAGAAGCCTCCATAAGGCGAAGCGGACGGGAGCGCAAACTTCCCGGTAAGTTGAAAGACTACATAACTGATTATGACGGGAATACAGGC…
GSR_IOB_NIMR_645	scaffold00081-scaffold05054-scaffold15831	KB665154		GATGCGAGTGTGTTTTCCTCTAGACCCACTCGCTAGTTTTGTATTATCTTTGTTTTGAGCTACACACGCTTCCCCACATTTCTCTCATCAATCCCGAAAATAGTAGTTTTTTCAAACACCACACACATCGGCAAACACTGGAAAACCCGGCCACCAATCCTCCAGTTTTCCGTTCTCCAGCGTACCAGATTCAACGTTTTTCCTTCAGCACAGCGTCAGAACAAGCATATACAGTGTAGCAAGCAAGCAAACCCGAAACAAGGTATCCTGCAACTCTCCCGGTAAAAAGTGACTGCTGCGCCCAAGCAATACAACCAGTGAGAACGCTTTATCCAGTGAACAGTGTGCTTAAAATCAGTCAAAATAACCGCCTTCGAAGCAAGCATCATTGAATCCTTC…
GSR_IOB_NIMR_646	scaffold01345-scaffold01649	KB664992	;	CGCCGGTGGCCAGCTTCACCACACGGAGTGCCTTTGCGGTGGCCTTCTCGACGTGTGGCTTCCACGAGAGGTGGTCGTGAAGCATGACCCCGAGGTAGCGTATCGCCGGTTTCGAACGTAACTCGACTCCGTTGATCACTACGGGCACCGCTGGGTGGCCCCGGCGCAGACTGGAGATGAGGACGATCTCCGTCTTTTCCGGGGCCAGCTGCAACCGATGTTGCTCCATCCAGGCGGAAATCGCTGCCACAGCTTCCTCCGCTACACCTGCCGCCTCCTCCGGTGTACACCCCTTGGCGAGTACTGCCAGGTCGTCCGCAAAGCCGATGACGGATGCACCTTCCGGCAGCTGCACTCCGAACACGCCGTCGTACAGGATATTCCACAGGGTGGGGCCCA…
GSR_IOB_NIMR_647	scaffold02435-scaffold00101	KB665365	AGAP007249	TGCGGATCGGTTTCGGTTGCGCGGGAATTTGCTTTTATGGCTCACGAGAAACCCCATTGACAGATCCAACCGAGAAAAAGAAGGTGTTTCCACTCGAACGTGCGAAAATTGTCTTCCTGCCTTGTATTCCTCTTCCCCTTCCCAAAAGCGAGCTCGCCAACTCGCTCTTCGTTAAATGATCTTCGTGATCGTGACACGTTCGAGCGGCCGACTCTGCCAAACCGAACCCTACGAGCTTTCGAGACGGTCCGTGTTTGGGAAAATAATGGGGACGTCGAGGTGAGGGGGGAGATGAGGCGACCCGAATGCTTGAACGCTCGACAAACGTGTCGATTTCGATACCGTGCGGTTACGGGAAGCAGTCAGTCTCTCTGTTCATTCCACCGGATTAACAAGTCA…
GSR_IOB_NIMR_648	scaffold00023-scaffold01205	KB665176	;AGAP000567;	TGTTCACGTATAAAAAAAATAAACACCCCCCCGAAAAGGAATATTTGTATGCGACAAAGTCAGGAGTTAGATCACATGTCCCATTTTCCTGTCTCGCAGTCTCCTCGCATCTTCGCTCAAAATAATCGAGTGTTTGGTAGTGTGTACGGCGACTACTAGCACTACTAGTAGGCTAGCGGAACATTTCGTGCATCTGGACTGGATGCTTGTCGCCAGACAAGTTGCGCTATCCGTATTATAGCTAATCGTACATTATCGCTAGGTTCAACTGGCAACAGACCGGGGTTCCGCGGTTTCTCAGCTCTGGCTGCCGCCCCAGACACGTTGCTCAATCCAGTCCAGGTAGCGGGTGACACGGGTGTATAGGCCGGGAATTTGACCACCGCAGGGCGCACCGGT…
GSR_IOB_NIMR_649	scaffold00062-scaffold02193	KB664444	;AGAP004731;	GCGCATCAGTTGACATTTGACTTTGGAACGATACGGATCGTCGGATCGCGGATGATTGTGGCGCTGTGTGCTGGTTGCTGGTGAAGCATTACTACTTGGCACAAAGCGTAGGGCAGGAAGGAAAGTAGTGGTCCGTTTTCAAAAAGCGCACTGATGCAACGGTCGACGATGTCTGGTGGTGCTTCCGGTTGGTGCTTCAGGGTGGCATGTTGCCCGGCgctgctgctgctgctgctgctgctgctgACAAACCTGCTACAGCAGGCACAAGTTTCGGCCAGTTCCGTTCTAGTGGCCGACTTCCGGATGACGCGGATGGTCGAACTTAGCAGTCGACCTCCTTACTGCAAGATCCACTCTGATCGTGGAGACATTCAGCGAATGTTGCTGGCATCGGAC…
GSR_IOB_NIMR_650	scaffold02893-scaffold18610-scaffold19264-scaffold00039	KB664439	AGAP005728;AGAP005728;AGAP005728;AGAP005725;	ATGGTCGTGTCGGCAACGGATCGCATCACGCTCAACGCACTGGACCTGAAGATCGGCACGGCGACCGTCACGTTCAGCGAGCAGACCCTCACCGCCCAGGACATACAGTTCGATGCGGACCAGGAAACGGCATGCTTCGTGTTCGGGTCCGAAATACCGGCCGGCGCCGCCAAGCTGACGGTCAAATTTAGCGGCGAACTGAACGACAAGATGAAGGGCTTCTACCGTAGCAAATACTTCTCCGCCACCGGCGAGGAACGGTACGCCGGGGTGACGCAGTTCGAGGCAACCGACGCACGGCGATGCTTTCCGTGCTGGGACGAACCGGCCATTAAGGCCACCTTTGACATTACGCTAGATGTGCCGCAAAATCTGGTCGCCCTGTCAAACATGCCCGTG…
GSR_IOB_NIMR_651	scaffold00038-scaffold04753-scaffold00141	KB664803	AGAP000391;AGAP000391;AGAP000391;	CCATTATTTCTTGGTAAAGCCGGAACGTACCGGACGTGATCAGTGGTGAATCGTGCCTAACCGTTTTTATTTAATTATTTTGTCCCAACACAGTTAGCGGTCGTAAAAAACGGTGCAAGCCATTAAAACTGTCCCCTACGCAGTTCACAGCATACATGCAACACACACGAAGCTGTGTGGAATGAAGGAAGAGTGAGACGGGAATGAAGGTTTATGTTTCAAAGGTTCACAAAATAATACCATGAAGGAAGAGTTCGAAGATGTGTGGAGCAACGATGCTGGCCGGAGCAATGCGCCAAAGGAAGAGCAAGAGCCACACGAAGAACCGGCTGAAAACCCATCGACAGTGTTGAACGATTGTCTGCAGCGGTTTGCCAATATGGACTACATCATGGAGCC…
GSR_IOB_NIMR_652	scaffold01271-scaffold00020-scaffold01456	KB664522		GTCGGTCGCGGCACAACGTCGTTTCTCTGCTGTCGTTCGTCGCAGTGATTTTTACAGTTTCTCACCATTGCTGGGAGTGTTTGCAAATACACAGTTCTAGTGAGTTTTGGCAAATATACGGTGTGTTACTTCGCCGGGAAAAATTAATGTCCGCCACCACTCAACCGGGTGTTGCGCACGGGGAAATTGCATATTGTACAGTTACTGTCGATCGAAGAAGCGAATTAGAAGTGCGAAGAGGCGAAAGATTGTCGATAAGACGGAGATTTAAAACGTGAAAAGCAGTCATACGGCTTGGAAATTGAAGTGTCGGCTGAAGTGGAAGAATTTACGGTCAGCTCGTGCCAAAAAGAAGAAGCAAAAGGAAGGTTCACCGTTCTGCCGAAGCCTTGTGTGGTA…
GSR_IOB_NIMR_653	scaffold03300-scaffold00663-scaffold03027-scaffold00024	KB664433	AGAP006812;AGAP006812;AGAP006812;AGAP006812;	TGGCCTGCCATTTCCTTCCCGAGCACAGCAGGACGATCCTGACACTTACGACACCGATCTCGGGATCACGCCCAGTAAAAGATCGCACGCCCCAttttgattatcttttttttttcttcttttatttgtcgttacttttgttttgtgttcttttgttgtttgttttgtcttAACAAATTATTGATTTGTTTCGCTCCGGACACACACGCGGCTGGTTGCGTCCAATTTTTGTCAACCGTTTCCCTACCGGAAAACCCGTCTCCTCAGCACACATTCTCACACGCTCACTCACACTTTTTTGTTGTTGCTGCTGCTGTTTCCTTTCACTACCTTTATCCGGCTTTTTTTCCTTTCAATGCTTTTGTTTTGCTTTAGTAATCGATATTAATATATATACTC…
GSR_IOB_NIMR_654	scaffold00724-scaffold00002	KB664580	AGAP002942;AGAP003484;	TTATTTGCTCTTTATTTCTGATTAGTGCTAATACATATGATATCGTTGCAAAGCGTTCTATTTTTACAGAAAAAAAGGCTCTTGTGAATATAGATGAAAACCCAAACGTTTTACCGAAAATTTTTGTCGCATGTTTTTGAAAAGAAGCAGAAAAGTGGGTCCCCAGTCACCCAGGGGACCGCCAAGGGAAAAGAAAGAAAATTTAATTTAAACACCATCCGGCACGAAAACCTGTGCCAAAAACATGTAACACAATAATCTATCGTTAGATTTCTACCACCAGCTTATTTTAGCTAAATCGATGCTTCTATAGCTAAACTGTTTCTTTTTTGCTGATAATTCTAATAAATGTCGCTTGTTTTACTGCAAACCAGAATATTTTGTGCATAGAAAGGTGCC…
GSR_IOB_NIMR_655	scaffold00070-scaffold13215-scaffold02044-scaffold15466	KB664459	AGAP005848;	ATTTTTAGCTCACACACATACACACGTTGTTTGGATTTTGAGTAGTAAAACTGGGCTCTTCGCTCTAAAATTCACTGGAATGGATTTTGTAACTTATGGAACCTAGCTGGTGGCGTCTAAACATGTAGTTTTGCCCACTTACATTTTGTTTCCTCAAATTTTGTCTCGTTTTGTGTGTCACGTTTATTGTTTTTTTTTCTTTCTAAGTATTTGTGTGTTTTCTTGTTGTCACTTTTGACACTTCTGGACCGGTTTGACAGCTATGGTTCACATCAAAGTTATTACAGCCTTTATTATTGGCACTATCAAGCCCCGTTCAAGACTTCTACCAATGGTTTCTTCACTAGGTCTAAAAAGTGTAGTGAGCGAATATAGGTTAGGTTAGTGTGAGTGTTTCGC…
GSR_IOB_NIMR_656	scaffold05210-scaffold00084	KB664988	;	TGTTGGAAAAAAATAAAATAAAACATTCCCTTTATATTATAGTCAATTATTCTTAAACCATACAAGACCAGCGCGATAGTATATTAATTGGTGTATTCATCTCAAAGAGAAACAGAAAAAAAAACACGATACCAACtaaatataaaattattttaaaattaaGTTCCTACTTCCAATCGCAGTGAGTGTGAGCACACCTGTGTGTTGGGTTGGTTGGTTTTGATATTAACTAGTAGCAGCGTTACTTTATCGAATAATGAATGCCGTGCACAATCCGGTTTTTTTTTCTAGTTTTCATATTTAATTGCCACAGTTTTCCTTTTTGCTTTTTTTAGTGTATGTGTGTGTGTGAAGAGAGTTTTTCCACTTCTTTAAGCCTAGTGTTGGTGGTGAGTGTGG…
GSR_IOB_NIMR_657	scaffold01927-scaffold00003	KB665376	AGAP003790;AGAP003790;	GCCACCTAGCCCAAATGAAGGTGTTGCTTGTGGCATAATCCGTTTCCGATTTGTACCAAGCTTTTGCACTTATGTGCATCCTAATCGTGGCTATCGGCTGCTACCCATTTTTGAAAAGCCCTACCTCCGTCGAGTGTGTACAGTTGATTCTAGGTACAAACAAACCACACCGAAACCATCAACAAAATGAGCTCGCAGTATTATCCATTCCAATGCACACCGACCGTCTACCCGGCCGATCCGTTCGATGCCAACGAAGATGCGGCCACGCTCCGTACCGCGATGAAGGGTTTCGGTACGGACGAGAAGGCCATCATCGAGGTGCTGGCACGGCGCGGTATCGTACAGCGACTGGAGATCGCCCAAGCGTTCAAGACCTCCTTCGGCAAGGATCTGATC…
GSR_IOB_NIMR_658	scaffold02626-scaffold01927	KB665376	AGAP003790;AGAP003790;	CACGTTCCACTTGGTGCAGCAGTGCTTGCTCCAAGTAAACTCCCGCACACTCGAACCCCGTTATTGTTCACCGAATAGTAGTGCACACCGACCGTCTACCCGGCCGATCCGTTCGATGCCAACGAAGATGCGGCCACGCTCCGTACCGCGATGAAGGGTTTCGGTACGGACGAGAAGGCCATCATCGAGGTGCTGGCACGGCGCGGTATCGTACAGCGACTGGAGATCGCCCAAGCGTTCAAGACCTCCTTCGGCAAGGATCTGATCAGCGATCTGAAGTCGGAGCTGGGTGGCAAGTTTGAGGACGTGATACTGGCGCTCATGACCCCGTTGCCGCAGTTCTACGCCAAGGAGCTGCACGATGCCATCTCGGGCATCGGCACGGACGAGGAGGCGATC…
GSR_IOB_NIMR_659	scaffold00588-scaffold00047	KB664910		CCGACGTTTGGCGTGCGAGCTCGGCCAAACAGGCAGCGCGATTGAAGCGATGCGCGAACCATGACCAAATCTAGATTAAACCACCGAACCGTTCGCGACTATTCGCTTTACCTAACGCTACCCGTCAGTTGGATGGGCCGGGCGGTGAAGGACACACACACACACACACATTCCGATGCGTTTGATTTGCGAAGACTTTTGCGTGTACATGGGCTGTTGGATGTGTGATTTACAATGTGAAAATGATAATGGCGGGAGAGGTTAGGGCACACACAGCATGGCGTTGCTCCCTCGTCCAGATCCTCGCTGATATGCAAGTCACCGGGGTACGCATTTCGGGACTCGAAACAAGAAAGAACGCAAGGTACGTGACTATACTGTGTGTTAGTTCATGACCAC…
GSR_IOB_NIMR_660	scaffold00028-scaffold10320	KB665025	AGAP010714	GTCTGATCATTCGTGTTGAACATTCAATTAATACTATGCTGCCACATCCACCACACCACACCACAGGTCAGTGAATTGGGCAATTTCTCTATCCACATTTTGCTGCGCAACCTGCGACCGGCTGGTTCGAACGTGAGAAAAATCCCCGTACCGGATGCAAACCCGCTTACGCAGCTGTTCAAGTAAGTCGGATAGAAATGCTGCCGGAGCATTTGACGCATGCTAAATCACCTCGCTCATATATTCCATGCCTCGTTTTTAGCTTTGTCTCCTGCCCGAACTACACGTACGAGTTCTTCTCGTGGGTCGGCTACACCCTGATGACGTCCTGTATTCCGGCCGGACTGTTCGCAGCTGCCGGCATGTACCAGATGACCGTGTGGGCTCTCGGCAAACACC…
GSR_IOB_NIMR_661	scaffold04320-scaffold10501	KB665021	AGAP000953;	TGAGTCCTGAGAGCAGAAGGGAAAGGCATGCGACAAATACGATTATATTCTCTATACAATCTACAGAGCATCCCCAGCAGCAAGGTTACATACAGCCACATAGTTTTCACGCGTATTACAACTGTGCTGAAGCGTTACATTATTATAATTAACCATTATCACCTGCACCTACATTACTGCATAGCATTATCGACTGTTGTTGCATTTGGATGAGATTTAAGGGATGAGCAAAGAGGCGGCAGAAATAGATGAGGGCCATTATTTATTGGAATGTTGTACGTTGGCAGGTATGGCTTGAAGTTTTGCAGAGGATGAGATTCTTAGGATGGTTCCAGTTCAAGGGAGGTGATTTGGACGGTATGTCCCGTCAAAGCAGGGTGATGCGTGTCGGATAGGTGT…
GSR_IOB_NIMR_662	scaffold00035-scaffold01339	KB664491	AGAP005229	TCGGACTCTTTTTTTCCCCCCGTTTCAGGCCGGGGTTTGAGTGCAAATGCGACTGTACTACGTGCCAGTGAAAGACATCGTTCGTACTCTCTGCTCGTACTTGCCGCTTTCTGGAAGGGTGTGCCCGACCGTACCACTTTCCTGGTGAACAAAATACCTCCCAAAGGGACGACGCTAACGGCACACATCGAACACGAACCCGAACCGGGAAGGCGTCGAGTATTTGGGAGGAATAATGTGTTCAAGACAGGCCGTGGTACGCGTTCGGGTGGATAAAACGGTCTTCAAATCATACCGAAGAAATCCTTCGTCTGCAAAATCTAGTGTAAAGTGATAAAAGCGAATCGAACGAAGCATTGGTGCTGGAAGTTCACGGTGGAACCCATCTCGCCGCTGCTC…
GSR_IOB_NIMR_663	scaffold03235-scaffold00046	KB665343		TTTTACATTTATATCTGATTCTATAATCCCTCCTTACTGACTAAGTTGTGTATATACAAATAAGGTGCGTGTGTTGTGAGGATGTGTGCGGAATTAACGGTTTTCCCATATTATGCACGGGAAAGTACGGTATCTTCGCAAAATCATGCACATGAACGACACGAACATAGGCGGTATGCTACGTAATCGGGGGGACCCTCAAATTCTTCCTCTGACAAATTTTCGCCATTGTCTCTGTAATGCTTTGTAGCAAGTAAAATGAATATCTATCACCAGCCCAGCCATTGATGAACATTGCCAAATTCCCAGCACCAGCGCAAACAGAAGTAAACTTTGGCAATATCCATCCACTGCTGATAAGATCGTCATTTCGACTCTATTACTACCGACGCTCCTAGT…
GSR_IOB_NIMR_664	scaffold04644-scaffold00051-scaffold12237	KB664456		ATGTTAAATTTCAATCATTTATTCCATACTATATGTATATATTCTACCTGTCTAATCTCTTTGCCTTATACGACTGGTAAGTAAAATTTAACACAACGACGACGACTCTACCATTTAGCCATTtttgtttgtttgtttttttttcttcttccatttttcttgtttgtttgtttgcttgtatgctCAAGTATGCGTTTTGCGTTTTGCTTTTTTCGTGCCAGCTGTCTCTACTGCGTGAGAGGCTAGTTGCAAGGAATGTTGCAGAATAATTTTGATATTTGGTGTATTTGTATTTGTTTGTTTGCTTTATCTAAACGTTCTTAAATAGTACTCCTGCAAACTGTTTTTTTCTTCTTCTTTTTTCTCTCATGCTTTTTTGTTTACTATATAGTTTGCATT…
GSR_IOB_NIMR_665	scaffold00070-scaffold15272	KB664459	;	ATTATCATCTTTTATTATAATCAAATAGAAACGGCCATTTTGAAAATTGGAAAATATTATTTTACAGAAATCCGCACAAGATCGCTAGCACTATACGGCACCCACCCCACGGGAATGGGGTGGTTACCCGAATACGACTATGCCTCCTGCGCTTTGGAACCACATTCAGCGTCTTTCCTTCTTCTCAACGGTTTTGTTTCACACATTTTAAAACATTTCTCCTGAGCGAGCTATAAGCTAACGCTGCTGTTCGATCCTACCCTTCGTTTAAGCCCCACTCAGTATGCAGCCGCCAATGCCGCATTTTGTTCTAATCAATTATCTGCACAGCTTGGTACAGATACGCTACACTATTAGCGTGTGATCAAGGATACTCTTCACACACGCGCGCGCACACAC…
GSR_IOB_NIMR_666	scaffold00731-scaffold07071	KB664482	AGAP005781	AACTTTCCGTTCATTTTATTTTGTATCTTTTCTTTCCCGTACGAAACATCGATAATAAAATCCAAACCCCATTTTGCTACACAAATCCGTTCATTTTGGAAAGTTAACAAAAAAAAAAGGCCGAATGCTTATGACACCACGCCCAGCTTCTTGCCGACCTCAATAAATGCTGCCACAGCGCGGTCAATTTCTTCCTCCGAGTGTGCGGCCGATAGTTGCACACGAATGCGAGCCTTTCCCTTCGGCACGACCGGATAGCTGAATCCAATCACGTAGATGCCACGCTTCAGCATCTCGTCCGCAAAATTCGAGGCGAGCCGTGCATCGCCCAACATCACCGGACTAATCGGATGGTCCATACCGGAGATGGTAAACCCGGCCTTGGTCATTGCCTCCCGG…
GSR_IOB_NIMR_667	scaffold00278-scaffold00046	KB664488	AGAP004619;AGAP004619;	TTTTTTGCTTGATTCTCTTTATTATTTTTAATAATTACTTACTTCTCCTTACTACGAAATAAGGGTTTGCTTTTTGTTTTGCTTTTCTCTGCACAGTTTTACTTTACTAGCGTGTGGTTGTGTGTCCGTCTGTGTGTGCGTGTGTGTGTGTTTGAGTTTTTTTACATCAATTAATAATAATCCTCATTTGCGTTATACGTTTTACTATCTTAATCTATACCATCCTGCCCCAACGGACGTTAGGAGGGGAGTTTTATATGTTACGAAGCACATGTAATTAGATTAACTGCACACGACACACCACACACTGCACACACACACACGCACAATAAACAATAGGGTTTGAAAAAGTTGGCTCCAATCGGTTTCACCTAGTCTGCTGCTGCTACTGATTGATTG…
GSR_IOB_NIMR_668	scaffold08681-scaffold00010	KB664477	AGAP007064;AGAP007064;	TGACAGCCAACGCAGCAGGTAGAAAAAAAAGAAAACATTTTGTCTACGTGTTTTGAAAACGTAATCTTATCAACAACAACCGCAATACCAATCGAATAATATCGGACCGTAAACAATTTTCCAGCAAGCTTCTGTTCGCACACCGACAACAACAGCATCATCGAGCAAGAATGGTTGAGCTAAGTTCCAGCACCGATCCGTTCCAGCACGGATTTCCAAACATTGTGTTCATCATCCCGGCAATTGTCGTGGTGGGATTGGGAGCATTCTTCGGCTACAAGCTGTACCTATCGCTCACGGAGAAGGAACGCAAGCGCGAGGAAAAGCTAAAGGCCAAGCAGGAAAAGGGCAAAAAGAAGAAATGATTCCCTGCCGCTAGCAGTATCACACCCGGTACCG…
GSR_IOB_NIMR_669	scaffold01743-scaffold00010	KB664525	;AGAP005773;	GCAGGAACGAATGGTACCAATTTTCTCAACCAGCAGCTCCTTCTTGGGTGGTGGTTCGACGAAAATTGTAGCACATAACAAAACACGGCGCCGATTAAAGTGAAGCGAAGAACCGATCGACACGTGCGGTGTGTGCGATCGACGGCAACTGTTCACTGTGGCAAGTGGCAAACACTCGGCGGCTGGCGTGCCTAGCATATAAGTCTTCGGTGTGCGTGTATGTGTAGGTGAAGGGTGTGGTAGTGGGTAGTAGCAGCAGACGCGCTGGTTGATCCGGATCGCGGCAGAGGGTCACCGTCACCGAGTTGCAAAAGATCTAGTGTAAGAAGAACCGGCCATCCCGGCGCAAACTTAACGCAACCCTTCCTTCGATCGGCAAAGCAACGTGAGAGAGCGAGA…
GSR_IOB_NIMR_670	scaffold00004-scaffold00569-scaffold00513	KB665310	AGAP000842;	TGTGCCCTTTCCTTTGTTTTGTTCACCGTTCTCAGAACATCGTCGTTATGTTCGTCGTTGTGACGAGTTAACAAAGTAGGCGAACGCGCAATTTCGATTCATTCCACTTTCTCAGCACAAACTGATCAGATGTCGGCTGGTGTGGTTAGCGTTTCGTAGTGAGAGAGTGATTTCGGTAGCACGAGAGGAAGATCTTTGCGTTAAAGCACTAAAAGGTAGCATTAGTTTTTGCTACGGTCCAGAACATTCTTCGAAAATGGAAGCTGTTAAACGAAAGCCAAAGAAAAATAAATGTAGCAAAATTGCTACAAAACAAGACAAGGAGGCTACGACATCGACAGCAGCAGCAACAGTAGCGCCATCTCCACCACCATCACCACCAGTTGCTTTGTCACAAGC…
GSR_IOB_NIMR_671	scaffold00134-scaffold00029	KB664744	AGAP008574;AGAP008574;	AAAAAAAAAAACCGTTGATGAGAAGGGAGCAATCCAAAAATAAACGAAAACGAACACAATTATTAACATAATTTCATTAGATTTTTTGCTATTAAGCTACGTAATTAATTTCGAATCTTACTTCATACAACTAAGCGAAAAATGCTTCCAGTATTAACTCACGTCAATCGTTTCAGCGCGCTGAAGCTACATACATTGCTTCCGAATTGGGGCAGTACATAGGAGTAACTTCACTACTAAATTTAGTCCGATGTTTTACACCGTCCTCCATCCCTTTTACAAGCTGTACACAATTAGAGAAAAGAAACGGATAGTCCATCTAAAGGAGAAAAAAATGCTTCACCACATGGAAAGAACACTTTTTGTCATACGCGCGGAAGCAATAATAATTCGGCTGAT…
GSR_IOB_NIMR_672	scaffold00010-scaffold01743	KB664525	;AGAP006746;	ACAATCCGACACGGTGTCCAGATTTATGTATTTTTCATTTTTGAATACCATATAATAGTCAACCTGATCGATTTAAACTCTACAATCTTTAGTATAGTACAAACGCGCCGTATGTGGGGTGCTCCCCATCTTTGTTCGGTTCCGCGGTACAATTCGCACAAATACGCTGGTTAAAAGGATGCGCGCTCAATGTTACAATTCCTACATCAGAACGAGCTCTGCTTAAGAGACGGTTTGGCTTGAAACGTCTAGTCGTGTCCATCAGACAAGTCAGAACGGTTCGAAAATGCTAAGCATTATTAACCGGATGCACAAAATGACCAAAACcacgcgcacacacacacacacacaaacacacacaTATATCCCCGGGTTTTACTCGCCCTTTGCCACGTACAA…
GSR_IOB_NIMR_673	scaffold00070-scaffold02169	KB664499	AGAP005828;AGAP005828;	GGAAGCTGTGAGCGGGAGCATACCGCAAGCGAGCGACTCCAATTTCAGTCGTGAAGTGAAGAAAAGAATTCAATTTAATACGAAGTTTGGCGAAGTTTAGTAAAACCGGAAGTTAGCTAGGACTCCTGGTCCGGATACAGCAAACGGAGTGCAATCAGTTGTGATATTATTATTTACTAATTTATTACTAAAAGAAAATCATCCTTTTCTCAGTGATCGGTGAACAGATCGATAGTGGTGACCTGTGTGTGTGTGTGTGTGAGTGATAAAAGCAAAGAAAATCAAACTGTGGTAGAAGAATATTACACTTTCTAAACCACAGCAAAGTTTTGTGGTGTGCAGAGGTGATATTTTAGTAGAAACGTAGGACCGGGAAAACAACCCAACCACATTCCACAT…
GSR_IOB_NIMR_674	scaffold00197-scaffold08399	KB664808		GGATAATGCGTGATTATCAACGATTCTAGAAACGCTCCCGGTTTAGGTGATCTAGGTGCGCATTGAAGTTAGACTACGGCTAGTGTGGCAGAAGGTTTGTGCTCAGTGTGAACTATTATTTACAACGCGTGTAAGTGTTGAACTGCTAATCAGTGATCCGCAATGGAGAAGTCTTTTTCCATGGAATAACTACGAGCGGAAAATGACGAGCTTCACCTAGAGTTGCACGCCGTGAAGAGCAAGTTTGAGGTAGCTAGCAACATGGTCATAGATTTGTCTGAAGAGCTGGAACAAGTGGTGACAAAATCTGCTAGGAAAAAGCAGACGTACACGAGCAACATGCAGGTCGAACTGTCTGTTTCCAACGCACCGATTATGTTCGACGAACAGGATTTGACA…
GSR_IOB_NIMR_675	scaffold03235-scaffold00046	KB665343		TTTTACATTTATATCTGATTCTATAATCCCTCCTTACTGACTAAGTTGTGTATATACAAATAAGGTGCGTGTGTTGTGAGGATGTGTGCGGAATTAACGGTTTTCCCATATTATGCACGGGAAAGTACGGTATCTTCGCAAAATCATGCACATGAACGACACGAACATAGGCGGTATGCTACGTAATCGGGGGGACCCTCAAATTCTTCCTCTGACAAATTTTCGCCATTGTCTCTGTAATGCTTTGTAGCAAGTAAAATGAATATCTATCACCAGCCCAGCCATTGATGAACATTGCCAAATTCCCAGCACCAGCGCAAACAGAAGTAAACTTTGGCAATATCCATCCACTGCTGATAAGATCGTCATTTCGACTCTATTACTACCGACGCTCCTAGT…
GSR_IOB_NIMR_676	scaffold00002-scaffold00606	KB664899	AGAP003725;AGAP004323;	ACTGTTAAACTTAAGTTTTATTATTCTATCAATCATGATGTTTCTTCAGCATGCGATGAAGCGAGATTTACACTAAATGAAGGGCTTTATTATCTCTTCTAGAAAGCGGCTAAACAGCTTAGTACTTCAACGGACCACGTGTCGGAACCATTCAAACTTTTCAGATTTTCAGTTTTAAAATGAATTTTGTTTTCTAAAAGTTTGAATTTTTTACTGAATAATCACAAGCAACGTGCGCCGATTGTAAGTCATAGGTGCAGTTTTTCCTCTTTTTTTTTTTCAAGGGAGAACTCTTATGTAGAAAAAGGCTTGCTTTCTCACTCGTTTTGTAATGTTACTACGCGAATCGGATTTTATGTGTAAAAGCTGATGAAAAATGGACTTTGCCGGATCTATCTC…
GSR_IOB_NIMR_677	scaffold02482-scaffold00007	KB664921	AGAP008985;AGAP003475;	CCACACAACCATATGCGCCGACCTGGTCTGCTGTGCCGTTCATTCTGTCCTTGCACGGGGCTCGTGGTGGTGTGGTGTAAATTTGGTTGCTATTTGGAAACAATCTCTCCCTCTTGACGAACAACACCGTTTGGGGAAACGTTTTCGTTGGCAAACAGTTTGCACCGGCCTGCTAGGGACGGAATCGGTGATTTCGGGCAGTGGCAAGCAATTTCGGAAAGAATACCCCATCGTACTCTAGCGCCATTGTTGTGCTTCTTTCACAATGGAGGAAGTGGTGACGATCGAAAGGTTGGCGGAGGAAAAGAAAAATAGCGGCAACGATGAGTACAAATCGAAACGCTACGAAGCTGCCCTCCGGCTCTACTCGGAAGCGATCCACCTGAGCCCCAAAACAGC…
GSR_IOB_NIMR_678	scaffold02332-scaffold00164-scaffold00321-scaffold13174	KB664510	AGAP005401;AGAP005401;AGAP005401;AGAP006243;	GGTGGTAAAGTAAATTCACATCCCACCAGCTTTCCAAGAGATAAATGGTGAATAGTTTATTGTTAATTTAGGTTTGGTTTTGTTTTTTTTCTCTCTGCGCTCTTGTTCTCCTTTTGTTTTCCGCCAGCCATCCGCGCATCCGGGGGTGTGGTTGGGTGCAAACAGTGGGTATCTTCCAACCAGCCCCTGCCACCTGCTTTTTTTTTTCTTCCTGTAGGGAGTTTCGATTGGTTTTTATCATGATGCTAATATAAAACGGAAACTGATACCCGCCGGGTTCACTGGTTTTTGCCAGGATGGCAGTCTATTGTGCGGCACCCAGGAATCTATGAGTCAGCGATGAGCACAACAAGAGCAAGAAAAAAGGACAGAGGAAACGGAAGTTCTAAGGATCGTCTT…
GSR_IOB_NIMR_679	scaffold02271-scaffold02493-scaffold00084	KB664988	AGAP011766;AGAP011766;AGAP011766;	GATTGTAACACAGCCCCGCAATGGTGGACAACCGTGCCCACCGCGCATCGTCAAGCGCCGCAAATGTACCGGCCCACCGTGCAATTAACGGACACACACACAGCTGTTTGTTCGCCTGTTGAGTTGCAAATAAAGTGCGCACATCTGTGCTTCATTAGAATTCGGCAGCGTTTTCTTTCCCGTTCATTCAGCCGGCTCTTCGATGCAGCTCCGTCAGCATTATGATCACGCAATCGTTTCGTTTTTTTATTGCTTCACCTTCACTGCCGCCATTTAAACGCCAAAACCGCGTCGCGGGTCCACATAATTCATAAATTCTAGTAGCTTTCACTTCACAACTCTACCCACTATATATAAATATACCTCCTAAACAGTTCTGGCTCCTTCCTGGTATGCGCC…
GSR_IOB_NIMR_680	scaffold00144-scaffold01641	KB664511		TTTACATTCGCAAGGCCGTCGATTGTTGCACGCGCTGCCCGGCAATTGGTATTGGCAATTGGCGAAGAAAATATGCCGGCAGCCCTTAAAGAATGTATTTTAAAGCCCGTCACCTCGGAACACCCACCGATACGCATCAACACGACGGAGCAAACGATAGTGGGCCGAAGTCCGGATACGTTAATACAGGATGCAAACTGTTCCCGGAAGCAAGTCTGTCTCAAGGCCAACCTGAAGGACGGCTATGTGCTGGTCAAACCGCTTGGCCTGAATCCCTCGGTGCTGAACGGCAAAGAGCTGCAACGGAACGTTGGCTATGAAGCGGTCCACGGTGACACGATCGAGCTGCTGCCAGGAATGTATAAGTACGTGTTTGAGTTCATATACGAGCCGTGTACC…
GSR_IOB_NIMR_681	scaffold01145-scaffold00073	KB664488	AGAP004335;AGAP004335;	GTGCGCGCATACGGTCCAGGAATTGAGCCAACTGGTCCAACGGTGGGAGCTCCAGCGAACTTTACCGTGGAAACGTTTTCGGCTGGCAAGGGCAACGTTGACGTAGCCGTACACAATCCGAACGGCAACCCGGAAAAAGTTGACTGCCGCTTCAACAACGACAAGAACCTAACGTACTCCGTCTCGTACATCCCGAAGCTGGAGGGACCGCACAAAGTGTACGTCAAGTTTAACGGGCGCGACATTCCGAAGAGCCCGTACGAGGTGCAGGTGGAAAGTCAAGCGGGCGATGCGTCGAAGGTGACGGCAAGCGGGCCTGGCCTGCTGCCGGACGGTGTAGTAGTTGGCAAGCAAACGTATTTCGATATCACGACGAAAGACGCGGGCAAGGGTACGCCA…
GSR_IOB_NIMR_682	scaffold02392-scaffold00493	KB664288	AGAP007780;AGAP007780;	TGGCAATTTTAACGGTTTTTACGCGTTGCTTTTATATTTACACTCCAATTCAAACAAATTGTAAGAGCGACGACAAGACTTCCACTACTACACGACGACCGTGTTCCAACGGAGGAACATGATTACAGAACGATCGTAACACAATTGTTGGTAGTTCTTTTTTTTTCTCCTGCGCATCATACATCCCTCTAATGTTCACTGGCAGCTTCGTCCTCTCCGGCGACCTGCTTCATACCGGTACCGACCGGTCCGTGGCGTCTTTCCCAGATCATACGGTGCTTCTGCTTCATGTAGGCCGTCTTCGCGTTCGCATAACCGCCGAGATCACCATACTTGATGAACCAGTTCTCGGCCGCCTTTTCGTACGTGTCCAGCAGCGAACGGCACTTGCGCTCGTGG…
GSR_IOB_NIMR_683	scaffold02076-scaffold02485	KB664445	AGAP004963;AGAP004962;	GTTCGAACGTGTGTGCGTGTGCTGCCAACAGGCCTTTTCGTTCATTAGCGCTCAACGTCTCCGAGGGTTCGTACGAATTCAAACGGTTTTGGTGTCACCGGCCGATTGCAAGCTCGGCGTACTGTTGGCGTGAGAAACAGCTGTATATATTTGTAGCGCCTTTTTGTGTTGTATTGTTTGTGACGGCTTTTGCCACCTTCTACACCGATAGATAAACAGGAAACCTGTCGAAGATGTCCCGTATTATCAGAATTGATGAGAACCACGTAGCGGGAAACCTGCACGAAGGAGGTGTGAAGAAAATGGTAGCCGCCACAAGGCGTCCCGTGTTGGGCGAGCTGGGCAACAAAGTGCTACGCAATGCATCCCAGGACTTGGTTGGCAAAGGCGCGGAAAAGG…
GSR_IOB_NIMR_684	scaffold01478-scaffold00103-scaffold14628	KB664367	AGAP009039;AGAP009039;AGAP009039;	CGTACCTTTTCCGTGCAGCGCTCCGCTCGTGACCGTGTGCCGTGCGTGCTACGTTCTGTGGTGTGTCCATGTATACCCGCGTTGCGTTGTCGTAAAGAAAAAGGGAGGGTCGGGAAGTCCGGGTCTTTCCAGAAAATCCTGGTGTCCAGTGGTCTCGCCGTCCATACTTGCTAGTGCCTTTCCTAGTTTTCCGGTTCCGGCCAAAACCCAGCTTTCCCAGCCGAAAAGACACTGCACGCGACTCGGTTTTTGGCGCGTCGTTCTGGGCTTTACGGAGGAGGCCCCCCACCGGGATATCTGTGTCCCCGTCACTTTTCCACGTGGCCACCGTAGAAACAAAGCAGTGTATATGTGTGACCAGCCGGGAAAGCGAAAGAAAAAGGAAAAATTCCAGTACAA…
GSR_IOB_NIMR_685	scaffold01444-scaffold03802	KB664621	;AGAP008287;	CTATCCGTCCTCAGTATATAATTCAGTTCTGTCTGGTGTAGTTGCATTGATGCAGTGATGCAGTTCTCGTCGCATTTAGCGCATCTGGTTCTCTCATTGGCTCCTTCTCTACTTACGCTATTCTGTTCTACAGTGATAAGAGCGAGTTCTGATCCATTATCGCCGGATGAAACACTGTTTGCTCACTTGCGATGCTTCGAACTGTTTGCCAGCAAACAATCTGATGATCGGGATCGTGATGCCTACAACTGGTTGGGATCGAACGAGAGCTATCTTCAGAGGACAGAACGAACGTCAAGTTTTGTGCACTGCGTACTGTGTCGCATGCGGCTGTTTGATGAATCAAACGTCCGCTTCAATGTGGACTTAATCAGAGCACAATACAACGAGTACAAACCA…
GSR_IOB_NIMR_686	scaffold00018-scaffold00320-scaffold00021-scaffold00184-scaffold07774-scaffold00031-scaffold00004-scaffold00060	KB665354	AGAP011566;AGAP011566;AGAP011566;AGAP011566;AGAP011566;AGAP011566;AGAP011566;AGAP011566;	gttgtgcctgctgctgagcctgctgctgctgtaccgctaccgcttgctgctgggcctgctgttgttgcagctgatgctgttgctgggcagcggctgcagccgccgcttgctgttgctgagcggcaacggctgcctgttgctgctgctgctgttgctgcACCATCGATTCCTGGTTGGTGGCTTGAATCACAACCAGCTGCTGCTGACCGGCGGACGCTTGCTGCTGCTGCTGCTGACCAGCCTGACCGGCGGCACCCGCACCACCCGCGACCCCACCGCCAGTGCGTTGATTCTGCTCCAGATGCTGACGCTGGTGCAGCATCAGGTGGTTCTTCTGGAAGAAGGCCTTACCGCACTCGCACACGTGCGTCCGTACGGTACAGCCCCCGTTCGGGTGAC…
GSR_IOB_NIMR_687	scaffold04693-scaffold21897-scaffold09690	KB664714		TTTATAACAAAACAAAAAAACACTAATAATGAGAATGTTGATGTCTGTGGTGCGTGGATTTAATCTTACCTTCTAGGTTCAGTCTTTGGCGGGCATGCTTCAATTTATTTTGGAAGAATGTTTTAATTTTTTGAGGAGTTGGAGTTACTCCGTGAAAGGTTCCAATGTGCTTAAATAAAGCAAGAATATTTTTATATCCAAACAACGGAATTTTTTGGTTCGGATGTCCAATTCCCGTCCAGCTCATCTCTATAACAAACTGTCTGGCAAATATGATGTCCATCGCTGAATGAAGCCTTTCTTCCGAGCTATCTGTTGGCAGCTGGCATTCCAGATATTCTTCAAATTCTTTTTTATACTGTTGATCATTAAGCTGCTGATCCACTGCATCCAACATTT…
GSR_IOB_NIMR_688	scaffold01897-scaffold00089-scaffold09065	KB664508	AGAP003525;AGAP003525;AGAP003525;	AGCAGAAGCTTTATCGAAAGTGGAAAGAGTTTCTCAACATTTTACGCGTCCAAAGTGTTACGTTTTTCGGCGAAAATACCTTGCAAATCTGGTGCAAACTGTTCGCAAAGGCGAAAAGCGGCAATATTTGTCGGCGACGACAGTTCAGCAGTGGCGGCAGCAGTGCATGATATCAACATAACAACTGGCACGACGCAAACCCTTCCCTGCCGGCAGTGTACCTTACACAAACACACACGAACACACACGCTCCACCGGATTGGATTCTGACTTGACGAGGTTGCTGTGTTTGTGAAAAGGTTTTTACCTGGACCCAGGGCAATCGAGAGCCACCGTACATTGCAAACAGAACGAGCCAACAGACGACAGCAGTGACCGAGTCCAGGCCGAGCTGGAAGG…
GSR_IOB_NIMR_689	scaffold00006-scaffold03402	KB664437	;	TATGAGAAGGGGATATGGTTCTATCACATAGCattattattagcattagtacagttattagtattattattaGTTCGCGCAAATAGCAATACCGGATAGTGGGAAGGTTGTGTGTTCGTCAATTCATTAACCGTAGCACATCGGGGGGACACATACGAGCGCCTACGCCCGATTTGGCTGCCACAAACGGCGTGTCTCCCAGATCCCAGATGACGCGTGACGTGAAGAATGGGGACCCCGATCATAATCCGATTATGTGCCCATGCTCGTTCGCTTGTCACCCATATACACACATTTAGCAGATGTCAAACAAGAAGATGAACCGGCTCCTACGATGCCTTTCGGTAAGCTTCTTTCAGAGAAAACCAACCCGTCACCATGGTGACAGAGCAGCAAACC…
GSR_IOB_NIMR_690	scaffold00051-scaffold08758-scaffold00716	KB664634	AGAP005071;AGAP005071;AGAP005071;	AATCATAACAACACACAACACTCGTCATTGGTTTAATGGTTTTATTCGACTCTTCTGCAGGGAATGTTGAGCGCATGCAAACTCTTAATTCTTTCTCTCCTTTAAGACGTATTCATTCTTATCAATAGTGCTGCTACCCTTCGCTATCGATTCCGTTCATCGTAATCGTGATTTATTTGCACTGTGTATTGCAACGTTTCACATTGTACATACTCGTCATTATCTTTCGCATCAATTAAATTAGTTTTGCTACACGTGTCGTAAGTGGGTAAGTTACAGTAGCGCCTTCACCGCTACCGAATGTCTTTTTTTTATGCAATTACACTACTATTGTTAGGGAAGATGAGAAGGAAGCGAAATAACATAATCGTTTACAGCAATATTCTAAAGTGGGAGTGA…
GSR_IOB_NIMR_691	scaffold00079-scaffold00674	KB665132	;AGAP002399;	TTTTAGCGCAGACGCATCCCGATCCAGCTGATGTTGTCACCCATCATCCTGGTACGATCGTGTGCTGATGCCGTCTCGCTTACGCCTCACGTTCGCTTGGCTGGCGGCCAGCGCACGCTCAGCGCAACACGAACGGCGCAACCAGGGACTACTTCATCCTTCAACGACTGGGGACGAGTCAGAACCATTTCGACCAGCAGCGCAGCAAGTGCAAGCATCGCAAGCAGGCGGCACGTAGTGAACGAGTGAGCCAGTAACTTTCTCGAACCAGTACCAGGTTACCAGTAGCACATCCGAACATCGTTCAGTGTCAGTAAGCGAGCCACCATGGTTTACGAAAGCGACTTCTACAGCACCCGCCGGGTGGGCTCGAGCTATACTCGCCCCACGATTTCCTCG…
GSR_IOB_NIMR_692	scaffold01105-scaffold00918	KB664551	AGAP001938	TATCATTTGCTTTTATTTATGTTCTACTTAAAAAAAAAACAACTCAACGAAACGATTATGTTGCTCCGCTAGCGCAGATCGTGCTTCCGCAGAGATAAAATGAAAAGTGAATGTAACCGTCCTCACGGATTTGCGCTTCCAGTATGATCGTATCCGCGTTCCGCACAAACATCAGTCTTCGGATATCCATGGTACGTCCCCCGTACTGTTCGCTGTCAGCAACCGGCTGTAACACCCGCCCGGACCCGCTGGTCACCAGCGCCAGCAGCGTTTGCCGGATTCGTTGGCGACCGTCCGGAGTGCGCAGTGCAGGTATCATCCCGAGCCAGCAGGCGGCTCGCTCGGCTGGTCCGAAAGGAATCGTACAGTTCGACGCATCAGCCGGCACGTGTTCCAGCA…
GSR_IOB_NIMR_693	scaffold00412-scaffold03801	KB665043	AGAP012010;AGAP012010;	CAGCAGCAGCAGCAGCAACATCTCGCAAAAAACAACCAAACATTGTGCAACTTTTTCCGTTTCCTTCCACATCGAATCCGAAGCAATTTTTCGTGGCACCGCAAAAAAGGTGCCGGTTAGCGTAGGAAAACGATCCGGGTAGCTTCCGGAATCATAAAGTATCATAAAAATATTGTTCTTAAAAAAAAAATCCATCACCGGGCGACGCTAAGTGTGGCTCGCAGTGTGTACTTACGGGCGCTGCTGTGCATGAGGAACATTGGACCGCAAGATTGCATCGTTATCTAATTTCTAGGTCGATTCACTTTCCTCCGCTTTGTTCGTTGCATTCTGCATCTCGCCCTACCCTAGCACCATTTGGTGTCAGTGAAAGATTGCCCTGAGGAGAGTGTTGTTGTG…
GSR_IOB_NIMR_694	scaffold00228-scaffold01363-scaffold11009-scaffold20111	KB664820		GCCCATCCCGTGCTTCATTTGAGACTCCAGTCCCAAGTGTTACCGCTGAAATGGAAAGTTATGTGCAGGAGGATATTGTTGCCCCGGATTTTTCTAATGTGGAAAATGAGGAACCAATTGTTCGTGATTATCTTTTCGACGACGATGACGATGATGATGCAGAAGATGTTCGACCGATAGAAGGAATGTCGATCACAGATGGCATCCGTTACTGGGCGTTATCCACAAATGCCTCGTACCGCTCGATCAATATGGTACTTAAACTTTTTCAACAAGCTCACGTTAAAGTTCCATCAACCGCTAAGACGTTGCTGAAAACGGATCGCAGTAGCTCGACGCAGATAGCGGAAGGAGGAGCGGGTTTATTTTATGTTACTGAGAAATCACCTGCCACCCAGC…
GSR_IOB_NIMR_695	scaffold01039-scaffold00032	KB664855	;AGAP002134;	GGAACATTTGCCATTAGGAAGGACGCGAACGAGATCGTTTCAAAATAACCGACATCATGTCGGGGTTCTACCCTTCTGTCTTCCTCCATTTTTTCTTTGCGCCTAACAAAAACAAAAAAAAACAGCCTCTCTATTTATCTTCTTTTTTTGTGTTAAGTGCATTTTTTTAACCTATAACGAGTCATAACACCTGTCTGTCTCTGTTTAAAGACCCATTGCACATTGCGTACCGTATACTGTACACTGTGAAGAGGTTTTTTGTGCTTGTTGGTCCACAGATTTCGATTTCTAACTAACTTTGCGTAATAAAATTATTGCCATTAAAAACGCACTCACACAGACATGCTCGAGACATTTTAGATGCGCACGGGAATTAATTTGCGGGCGTCTAAATTTTAT…
GSR_IOB_NIMR_696	scaffold09049-scaffold00060	KB664510		TTTTCCCCTTTGAGAATATCTAAACTAAACTCCTACATCAACCGGCCATATTGGTAACACTAAAAAACCATCGATGAAAGCCAGCTGGAGGTGACCATCACGTGCCCGAGACCATCTTGAAAAGCCGTCGGCGGATACCACTAAAAGCGACACCCTGCAGTACGCAATGTGCCCGCTGAGAAATTAGCCTACGTGCGTTGTTTAGTGTGTAAATGTAGCACAAGTTCCGTTTTCGATGCGGGCGCCACGAGCCACCAAAGTACTTCACACCAGCCCCGCATCCCTATTGTTTGCTCATTTTCTACAACCACACTACTACTAGGCACCGAATATACGCGGGAAGAACAGGCCGTCGTCTATCTGAGTGTGTGTGTGTGTGTGTGTGTGTGCGTGTAGAGC…
GSR_IOB_NIMR_697	scaffold02737-scaffold00028-scaffold07364-scaffold00017	KB664499	AGAP011959;	CCTGGCTGTAAACTGACTTTGCCCATTACCGTTATTTTCATAACGTTCGCGTCCGGAGCAAGAGGCAAACCGCGCACTCGTCGTCTGTTGTGTATATGTTGTGCATCGCTGGCTGTACGCAATCGAAGGAAAAAATTGACATTCCCATCGACTCCCGTTGCAGTTCTTGCCTGCCTGCCCGTGCGTGAGTGCGCGCTATTTGTTTGGCCGTCCAGGTGTGATGTGTTGATGTGTTTGTGCACAGGATAACGTCGGCAGTAGGTGGTAACAGCTCGTACCACGCTACTTAACAAAAGTGTTCCCGTACGGCCAGTGTTTCGTTTTTTTTTCTTTCGTTCTTAATAAGCGTCCGCCCATCGGTCGGTATCGATAAAATAATTTCGATTCGTATGACATCAC…
GSR_IOB_NIMR_698	scaffold00094-scaffold00516	KB664810	AGAP008742;AGAP008742;	ATAATTTCTCTCCATCGGTAATACATTTTCAATTGAGTTCAAAGGTGTGTTTTAGTGTTTTTTGTCAATGTGTTTCATAAGAAGAAAATAGAAAAAAAAATATAAAAGCACAAAAAAAAAACAGTTTAAAGGAACAGATGAAACTTACTGATCGCGCGCTTCTTCTCCCGTCGGCTCCTTCCTTAATATACACAGGAATAATGTTCTTTACAGTGCTACTTACATTTGTTAGTGTGTGTGTGTGTTTACGTGTCGTTTACCGTATGCTTACACCATTAAGGGTAGTATCTACTCTACTTACAGAGTGTGTGTATTTGTGTTTGTCTGTGTGTGTGTTGTAAAACCTTTTTTTACACATGGCATTTGCTTGATTTGGTTTTTCCACTTTCATTTGTCCTC…
GSR_IOB_NIMR_699	scaffold07198-scaffold10828-scaffold12201	KB664439		ACAATTTGTGGTATGTATACGTTTGAAAACTTAAAGCATTAACAACTAATAACATTCACGCTAGCCGTTGAAGGAGGTTGAACAAATTTCAAATAAAAAACCCACATCAGTTCTCATAAGCCTACTTTTAGACAGACCGTCAGAAACAATCAGAATGAATCCACATCCGAAAGCATCGTAAGAAACACAATAAATCTTTCGTTTCAGTTTTTCTTTTTCTTCTTGTGAACGACTCGTTAAAGCTTGAATAAATATGTACTTTACTCGTTGTAAAAATATTAACCTACTTTCGGGACTTACTACAAAGCCGGATAGCTTACACGAATAGAGGTTCCTATATCTTCGGGATGTCTTGCACTAAAATTCGTTGCCACCCTGCGGCATGGGTCGTCGAGCTAC…
GSR_IOB_NIMR_700	scaffold00097-scaffold02276-scaffold01482	KB664544	AGAP008656;AGAP008656;AGAP008656;	CGTCACCGCGACGATAATTATCACCCTGATGGGATCGTAGGGTGCCGAAGTTGTCTCGGCCTCGGTAATTGTCTCGTGCATTATTGTAGTTGTCCGGTTGGAACTGGAACAACGTTTCCGAGTTGACGCCATGATGATGACCCATCGGTTTTCTTAACGTATTTTTTGGCGAATGCTGCATCTTATTCTGACTAGACGGTTGAGGTAATAGTACAGGCTCGGCGTAGGTCACTTCCTCCACCTGCGGCAATAGCTTCGGTTCGGCTTGTATCCGATTAACGTTCTGGCGCTGCTCGAAGTATTCGTACTCGGTGTCCGGATAGGGTAGATTGTCGTCCTCGTCCTTGTGACACCGGCGGCCACAGAAGTAGCCGGTAATGAAACCGACCAGCAGGGCAA…
GSR_IOB_NIMR_701	scaffold02775-scaffold02116-scaffold00006	KB664288		GGCTTTCGGAAGTGTGCGTTGCTGCTGGCTGGCTGCCCAAAACCCGAGACGGCGATTCCGCGTACGTCCCAAAGACGAGCCGTGCTGGAGTTAACCAAACACCTGTTTACGGTGCTTCGGATCACGTGCGTGTGTGTCCAGTGATTGGTGAAGTTTAAATTAACGGTCAAACGGTGTGCTCGGCGAAGGATACAAACCAAATCACAGTAGGCGGTGAGTGTTAGAAACGTCAAAACGGTGCAATTAATTCGTTGTGACTAGAAGGAAGGAACAGGTTGTGCGTTTGCGGTGGTTACGGCAGGTTACGGTCCGTGGCAGATAGTCCACCATTCCCCTGCAGTGGACGACGCCAAGATGAACAAGTGTACGGTGGGAAGACTGTTGCTCTGCTTGCTGATT…
GSR_IOB_NIMR_702	scaffold00100-scaffold07151-scaffold00800	KB664511	AGAP012185;AGAP012185;AGAP012185;	CTTCTTCTTCGACTCGGCGGatcatcatcatcatcatcatGAGTTGAAAGATGTTTAAATTTTGTAGATAAAGAGGAAGCtttaaaataacataaaaataaataaaataaataCTAAATTCGGAGTTTTAAAACGAGAGCACAAAAATAAACAGAACTAAATCAAGGAACTTATATTTAGACCATTAGATACTTAACAATGTTTAAAGTGTATTTCGATAAGGTTAAAAACCACGACGAAACGCGTTCCGCCGTAAGCGGTGTCTGCGCGCGCGCGCACaaaaaataatatatttaaattaaaaataGTATAAACTGAAAAACAAACGGGGCAAATATATTACTTACGGCGACGAACCTAACACGGGTAAAGGATTCGCAAGGTGATGTGTGTACGTAC…
GSR_IOB_NIMR_703	scaffold03466-scaffold19148	KB664510		ATCGTGTACAGCATGCTGCGCTTCTCCATATGACTACACACGCGTACCCACACACAGTTCAGTTCCGATCGCGGTCCAAGCCGGATGATTCGTGTTTTTTGCGTCGTGTACGTGCGTTCTATGCGTCAGCCATGGGTATCGGCGAATCAAAGCCAAAAACTAACATTTCGCATTCGAAAGCGAACAACCGTAGCCGAACAACGAATGGACAGCATCAGCAGAAGAAACGTGATGGGCCAGCGCGGCCAGCCGTACCAAACCCCCCGCAACACAACAAACCCAATCGGAGTAATCATCCGGCTGCGCACACTGTAAACACCCAAAAAGCTGCACCTGTTGCCCAAAAGTCACACCGACCGACAGCACCAAACGTACTGCCGGAACGAAGCAGCAAAGGAC…
GSR_IOB_NIMR_704	scaffold06621-scaffold04290	KB665165		AAAACAAACAAAACATTACACCAACACACACAACAACAACACGTACACACAAACATAAACCGAGTTCTCTTCAAATCAACAGCGATTGTAAGGATCTTCGCAAAAAAGAAAAGAAAAACAATATGGACCGACGCGACGAAAAACTGTGGCACAGAAAGCGAGCAGAGAGAGAGAGAGAGAAAGTAAAAGATTATAAGGAACTGCAGCATAGAACACTAATAACAGCTAACAACAGGGGGGAAAAAGCGAGATATGCACACGGAAGATGCAGAGCAGCAGGGCGCGCACCAGCAGCAGCAACAAGGAATCGCATGCTTTCGAGATGTGGTAGAGGGCGAAATAAGCGAAAGTCCTCCCGCGTTTTTTTTTTAATTTTTGGTTGATAAGGACACATCTGTA…
GSR_IOB_NIMR_705	scaffold00198-scaffold00111-scaffold22667-scaffold00208-scaffold05320	KB664510	AGAP005394;AGAP005394;AGAP005394;AGAP005394;	GATCGATTGGAGAGTTTTATTTTCTACCTAGTTGTAAAAACACATCTTAAAAGTAAGTACGAAATTTAAAAAAAAAACCTAACTCGTGCCCTCGAATTAATTATCTAATCATCTAAACCCGAACAAAACGTGTATAGAGAGAGTGAGGGAGCAAAAACCACGTAAACGATAGGTAAACTTAAAAATTGTTCTACAAGTACACAAAGTACAATCACAACAAGAGCCCTGTTTTTTGTGTGTGTGTTTTTAAGTGTGTCTACTACTTACAGTAACTTACTGGGCCGTTAGCCCCAAAAAAAAAGTGTATAGTAACCGGCACCACCGCAGAAAGGGCTTGGGCTCGAAAATATGACCTCTTTGTCTAGGGTATGATGGTCCCGGATGGACGAATGGGGTGCG…
GSR_IOB_NIMR_706	scaffold00012-scaffold02914	KB664472	;	ctctctctctctttcGCCCATTTCGTCTCCTCTGCTCGGTACTCGTCCTCCTCGCATCCTTCTCTCTTGCCTATGACTATGATTTTTTTCATGCTTATAGATTATATTTACTGCTGTTTTCTTTTTTTGTTTAATATTATTAATTTTGTCCCATTAACGCGTCCATCCGGGATTCGGGTTTTCTTCTTCTGCTCCCTTTGTATGAAGCTCATTCTGCTTCTACTATATTGATCTTGGTTTTTGTTTCCTTCTTTTATTCGATCATTTTTCTGCGTTTCGTGTGCATTTCCTTGCTTAAATCACGTTGCTCGTATTAAACACTTGCTTATATCGCCGATCAAAAAGCTGATTGCTGGTTGCAGTTTGGTCTTTCCTTCCATTTCCATTAGCGCACGGGGA…
GSR_IOB_NIMR_707	scaffold11238-scaffold04693-scaffold19164-scaffold00127-scaffold00043-scaffold20538-scaffold00743	KB664734		GCACCTCTCTCTTTTTACGCTTCCCCATAGGCAAAACACACTAACGCTTTGGGATCGATGATCACTTTTACTTAGAGATTGGACTCAAGATAAGAAAACCGGTTTTAGCTGATAACAAGCGATTTGGGAGATAACACAAGCTGGAAGCTGAACCACTCGCTTCGACGTTCCAGAATAAActgaatgccgacgccgggatcgaccgtcgcccgctgctgcaatccggccaggaacgcgtcGGTCCGCACAAAATCCGACCGCCTGCTATGCTGTTTGCGATCAATAACACTATCCACGTCTTCACCACACTCCTCGAGCTGTACGCGTATTGTTTTTACGGTGTTAAGCTGGTAGCTGGCATTCCAGATATTCTTCAAATCCTTTTTTATATTGTTGTTC…
GSR_IOB_NIMR_708	scaffold09608-scaffold04189	KB664474	AGAP011954;	GGGAACGGAGTCTGATTCGAAATCATCAAGCACAAGTCATCGGCATTATGGCGTGGCGAAACATGAGTAGTTTAAGTAGGTTTTGCATGATGTTAAAAGTGTACAGTACTATAGGTTGGTAGCTTATAGGCTAGTTTTATAAAAGCGAAAGAACGATTACGATTGATTGTTTTCTTTAGTTCGGGTTTGATTTTTCTTCTTCTTGCACAGAGCTGGTCAAGTGTGGTAGAAAGTAGTGAGGATGTTTTTTTTTTTTTTTTTTATATGAACGGGGTATGTTTTAGTAGTGTAAAAAGTGGTTGATGGATTATGTATACTGTTATGCACTAGTCTGGTTGTGTATTGATCGAAATGAAGAAGCGTTGTTCATATCGTTTAACTACCAGATTTAGTAGATTT…
GSR_IOB_NIMR_709	scaffold01384-scaffold00136-scaffold05206	KB664510	AGAP006243;AGAP006243	CCAAGAATTACCGTATCTAAATTGCCTTTATTTCTGCCTTCATGCATTCATTATACAGCAGAGCTCGCGCAGCCAGCAGGAGAGCTCGCCTCGTCATCGCCTACTTAGTGAGAAATGTGGAAAGCGTATTTTATATATCTGTATCCGGTTTTTGTTTGGTGCAAAACCCAACCCGCTCGTTGTCTTCCCCAAATACTATCTCCAAAACTAAACACCAGATGAAGAATTTTTGGGGGCCATTTTGCGAACACTCACATACACCCCCATTGGGTCCTTATCCCAAAATTCTTTCTATTTTCTTCTGCGCATCTTTAGTACATCACCAGCATAGGGTGGAAGGTTCCACAACTAATATCATAATACGAACAAGAGAGGGGAGCGATAGCGTACATTTCTCAA…
GSR_IOB_NIMR_710	scaffold00023-scaffold01205	KB665176		AATATCTGCGCGATCGAGCCGTGGTATGCGAGACCTACCGAAGGGGTGCAAAACCCGAACCCACGTTAACAGCTGCGACCGAAGCAGCGTTGTGTCAAAGGCTTCTGCGGTGTGCGCACCACCAACACCACCACCAGCGCTACCGGTTTCGGTTCTCTCTCGTTCGTGCCGTGCGCATTGACGGTGTGAGACGGCTCGCATCGCAGTTGCAGCGTGTTAGTCCGATCGGTCGGTTCGTTATCTCCGGTGCTCTGGTTGCGTCCGTTCTTTTCGGGAAAAAGGGGCAACTGTTAGTGTGTGCTCAGCGGTGAAAAAAGCACTAGAAAATTGATTCGTAGCCGGTCGGTGTAAGTGTGTGAAACGGTAAAGTTGTGAGTCACAACAAAAAAAGGACAGAAG…
GSR_IOB_NIMR_711	scaffold00027-scaffold03619	KB664471		CATGTCGATTACGCACGGTTTAAAAAGATTTTAACTCGAAACTTTCACCCTTGTGAACCGCGAAATAATCAGGCAGCAAGCAAACGTGTGGTGTGTGGAATGCTTTAATTAAGCGTGAGGAGCTGAATGAAATCGGTATCCATTTGATTGTGCCCCCACCAACCGGCCAAAGACGTCCGTGAGTGCTATCCAAGAGATAAGCAGCCTCTTATAGTGAAATTGATATTATTACGCAGAATGGATCCACTCGGCGGTCCACTAGCCACCGAAGTTGTGAGTCCCAGATAAGTGTGAAGTGAAGATGGTTTGATTGATTAAAGATATTTTTATCTACAATTTGAGAGGAATTCCCCGCGCTCTAAGTTGTGCTCTGTCGGGCGTGAACGCGAAGAAGAAAGG…
GSR_IOB_NIMR_712	scaffold00014-scaffold01967	KB664592		AGTACTAACAGAAGAAAAAATGTTTTATTAAAATCATCCACGGGCGCAACACAACAGCGTTGCGAAACAAACGTACATAAAATTAAATTTAACACATCTAGCACGACTCCTGGAACACAAAAAGGGTAAAGCAAAATCATATGGAAGACTTCACTATGAAGTGATAAAACTGAAGTTGAAAATGAAATCCCATTTTTTCGTATTTCTGGCAAGAGAGAATATGACTGTTGCAAATCTTGCAGAGTTGCTCACACAATGATACAATATAAAAAAAATCCTAACGAACTAATCCATTTCCCTACGTTAATTGGTTGCGAAATCGTCGTTGACACGCGGTGCTTGGAATGAGTGAATATTGCCGCTCGTATTGCATTGTTGCTTTAAACGAATCGTTTTTCC…
GSR_IOB_NIMR_713	scaffold01101-scaffold02388-scaffold00176	KB664622		AAAGAAGCCCCCGATAAAGAAGATAATTCTTAATTGTTATAAATGTCATCAAGAAGGACACAAATGTACTGAATGTCCAAAAGTGAAGCCAAGAGCAGATTTGGCTAAGGTGGACAATTTGTCATTTGTTAGATTGGTCGAAGGTAACGCGTTTTCGGCAACAGGACAAATATAATTGTTTGTGGATTCAGGATGCTCGGACCATCTGGTAAAAGATAAAAAAATTTCGAGTCGTTAACTCCGCTAGCAGTTCCAGTGAAAATTTCAGTAGCCAAAGATGGCGAATCCATCGAAAGTAGTCACAGTGGAACGATTCGGCTTTGTTCAGTGGTTAATAGTGTGCGTGTGCCGTGTACTGTAAGCGTGCTGTATGTTCCTGCTCTACGCTTTGTAGGAAAA…
GSR_IOB_NIMR_714	scaffold02098-scaffold00028-scaffold00006-scaffold00044-scaffold00017-scaffold00053-scaffold00054-scaffold00071-scaffold00126-scaffold01239	KB664434		CAACGAACCGAACCTATTTAATTATTCAAATTTGTTTGCTCACTGACACTTCAAAGGTGTCGAACTAGGGAAGCATGAGCAAAATGTCAAAAAAGGGCTCCAGTGAAAAAACTACACCTATTGCGCCGCATCGAAACGGGTGCTGCACGCTGTTTTGTTGATTGCGATTGGAGTACTTCGGTTATTTGCGTTGATGACACAATGACAAAAAGATTTCACCGTATGCTTCGAGCACGGTGAAGAGAAAATAGAAGAAAGCATAACCAGACGGAAACAAGCTGCTGTTTTGGGGTGGCCTTTCCAACAAATCTCAGCGTGCAAAAAGTGCGTGTGCGTGCTGTCTGTGTCGTCGGTCGCCAGTGCGTGTATTTGTGTTTCCGTTCTATTGTGTCGCCTCCG…
GSR_IOB_NIMR_715	scaffold00055-scaffold00728	KB664531		CAACAACATTGGAGCACCGTCGGACTGCAGAAGAAAAAGTTTGTTCATACACATATTACACTATTCCATGTCCATATTTGTTAACACATTTTAGTGCCGTGCCCGGAAAACCAAAGGCATGCGTGCAGTCTTTCCTCGTACAACACAAATTCTTCTGCGATAGCTCCCAATGGTGACTTCTTATCCGCGTTTGGTGTGTATCCGCCTGTGTGTGCAATTGTTCGTTTTCGCGTACGCGTGTGTGTGTGTGTGTGGGACTGGGTGTGTGTTTAGTGGGACGATAAGTGGTTTATAAATTATTGTCGTAGCTGGGTAATTGAGCTAAGGCTGTTTGTAGTACGGAAAAGAAATTGGAAGAAAAACATCTAGAAGGTTGTGTTGTTGTTGTGGGTGCGGGTG…
GSR_IOB_NIMR_716	scaffold00161-scaffold18289	KB664551		ATGTTAGATGCGACAAACGTGGTGTGCTTCACTGTTGGTTTATGGTGCGAGGGTGACTCAATCGGGATCGGGTTCGGAAATCACTCTAATAAGCTTCGGCTAATAGAGTGCTCAAAGTAGAGTGATCTTGAGAGAGTTACCTTCGTCACGAGGGTAACTCAACGTGCCCAAACTAACTGCGTTTCGCTATCGTAATAGAGTTCATTTTTATTAATGATACATATTACTGTTCTGTTTGTTTGTTGTTCTAGCAGTTGCTGTTTCTTGATCTCTTCTTTTCTGGTGTAATAATTACAATTACCTCTATATTGACAAATACCAGGGGAAGGGGAAACGAACAGCAGGCAGGTGGTGTGTTTTGcacacacacacacacacacacacaGACTAAGGAGAATG…
GSR_IOB_NIMR_717	scaffold03973-scaffold00029	KB664412	AGAP008412;AGAP008449;	ATTTTATTTCCATTTTGCATTATGTTTTTGGCCATTAGTTGTCGTTTTTTCCCGCTGTCCTCAATTGCTAACAGTGATTTTTGCACTACTACTATGTCCTGCACTATGGGAAAGCCATCATACAACGACGTCTTCCAGTCGTTCGCTGCCTACTGTGTTAAGAGAACATCAGCCGTAAGTAGTTGTGTGTGGTGTAGCTTTGCTTTCTACGCTTATCACCGGCCGGTTCTACAGGACACACAAGCGAGTTGTTGGGAGGTTTACTGTGTGGTGGTTGCTTTAAGAGCGGATTCTATTTTTTTTTCTCTCCAAAACTTCGGACATCATGCCCATTCCGTTTGTCAGGTATCTCCAAAGAGGGTAGTAGCAATAAGAAAAAGGGTCCTAGTAAGGATTAGT…
GSR_IOB_NIMR_718	scaffold00109-scaffold03465	KB664419	;	CTTAGATATCAGATCCACCACCACAAATCCGAACGATCCTTTGCACACGCACATACTATCTGTCGACGCAGAGGAGTTCATACCGAAGGCTAAGCACGGGGCGTACCAGCCAACTCAACCCCAGGATGGTGGACAGTATCAGCCCCAGATGGGAATGCATCAACCGCCGGCGGCATCACACGTCCATCAACGGTTTGCAATGGCACAGGGCGGTGGTGATGGCAGTGGTGGTGGTGGTGGCGGCGGCGGCGGCGGCGGCGGCGGATACGATTACGCCACGCATCATCTTGCCGGCAGCAGTAGTAACGGACCGGCAATGATGGCCAACGGAACCGCTGGGCCCGGGATGTCGTTGCAGAACCGGTTAAGCAATATGCAGCTTGTGGACGGTGGTGATAA…
GSR_IOB_NIMR_719	scaffold01855-scaffold01890-scaffold11678-scaffold00061	KB664733	AGAP005071;	AGCCAACGAACGAAGCGTCGATGAAACGGTCAATGATGACGTCTCACAAGCGAAAAGTGAAGTTGAAGGTTCATGGGCGGACGACCATGATGAACCTCACAGTTGCACCGCTGTACAAAGGAAGGGAGACGTGAACGAACTTGAAGTGATCTCGAACGATGTGTTGCAGTCAGAAGATGTTCTCGCAACGAACCAATCTGACCGTGACCGAGAAGAGAAAGTTCCTCTGGAGGCAGAACAAAGCGAGACTGATGCCGACACTGTTCCCGTCACCTTGCTGCTTGAAACTAATCTTACAACTTCGCCAGTGTGTGAGAAGATAGAACAGGACTTGAATTCTGTTATATCGCCTGAGGATGGTCCCACTAAAGATATCGTCACTGGTGGAACATCCCCGGT…
GSR_IOB_NIMR_720	scaffold00517-scaffold00008-scaffold04123	KB664400	AGAP005619;	GCGACCGGCATCAGAAGCGGAGGCAAACAATTCTCTCGCGAGAGTATAAAAGTCAAGGACTGGGCTGGATTGTGGTTTTGTAGTGTTTTCAGTCGTGTAAACAAGATCATTGCCAGGTGCACTAGTGGAGTTGAATTAGTGGTTGATTAAAGAGTTCAAGTGAGCCTGAGGTGGTGGAGACTACAGTGTTTTCCCAACTCAAGTGAGAGTGTGTCTGGTGGAGTAGCTAGGATTATACACAGTGTACTAAGAGAAAAACCTCGACGTGTGTAATAACAGTCCTGGAGTAAGAAATTCGACACAAGGTCCCCTAAGACAGACGGACAAAATGTTGTGCGTACATCCATCCGATCATGCGGATGGTAGAAAGGGCTTGATCTACAAGCTAGCCCATGCCTG…
GSR_IOB_NIMR_721	scaffold00973-scaffold02771-scaffold00010	KB664525	AGAP005758;AGAP005758;AGAP005757;	CCGTACCCGTTTATCGGTTATCACATTTCGGTTCTTACCACCCGCCCACACAGGTCACAGATATCCCTTTCGATGTGTTTCGATCAGTTCGCGCCAAAAGTTGGCACGCTCCCGGGTGGGATCCGTCACCATCGCCGGTTTCACACCAATCTCGAGACAGTCGAGCCGAAAGTCGACCGACCCATCGCGAGGAACCTTCCTTACCGGGCTCCACTGGACATCGACAACATCCCGCGAATCAACCGACGGATCACCGTGCTTGGCGAAACTGGTCCAGAGAGCGACAAAGTTATCCCGCACACGACATTCGTCACTCGACTGTGAAATGTTGGGCAACAGCTTTGGGTTGAACATGTACAGCAAATCATCACCGTGGCACGCACCGGTCACGTTCGCGCT…
GSR_IOB_NIMR_722	scaffold03235-scaffold00046	KB665343		TTTTACATTTATATCTGATTCTATAATCCCTCCTTACTGACTAAGTTGTGTATATACAAATAAGGTGCGTGTGTTGTGAGGATGTGTGCGGAATTAACGGTTTTCCCATATTATGCACGGGAAAGTACGGTATCTTCGCAAAATCATGCACATGAACGACACGAACATAGGCGGTATGCTACGTAATCGGGGGGACCCTCAAATTCTTCCTCTGACAAATTTTCGCCATTGTCTCTGTAATGCTTTGTAGCAAGTAAAATGAATATCTATCACCAGCCCAGCCATTGATGAACATTGCCAAATTCCCAGCACCAGCGCAAACAGAAGTAAACTTTGGCAATATCCATCCACTGCTGATAAGATCGTCATTTCGACTCTATTACTACCGACGCTCCTAGT…
GSR_IOB_NIMR_723	scaffold00074-scaffold12145	KB664999	;	NNCCCCACTCCTCATTTGTTGCAATAGAAAGACCAGACGAAAATGATCGCGAATGATCGCAAGCTGATGAATGATGATGATGTTACTCTAAGTAAAACCGGAAAGGAAAACCTCACACTATACCTTATACAGGGCTATTTAGCTTCTACTCTCTTTTCTCCTCCGTTCTATTACGTTAGGTTTGCCGTTGAAAGAAGATTTTCCGTTTTTTTCCGATGCTAACCAACTTTTCACCCGTTTTTTTATAGACTCCTCTTATTCTTCCTCCTACCGCATGTTCTAATCCCGTTTCTGATTAAGTGTGCGCGCTCGCAGACGATAGGGTTATAATTATAATTATTTTTTAATTTGTACTGCTTGATGATGATGACGATGGATGGATGGATGGACCCGGGCGCG…
GSR_IOB_NIMR_724	scaffold00320-scaffold00018-scaffold00021-scaffold00184-scaffold07774-scaffold00031-scaffold00004-scaffold00060	KB665354	AGAP011566;AGAP011566;AGAP011566;AGAP011566;AGAP011566;AGAP011566;AGAP011566;AGAP011566;	gttgtgcctgctgctgagcctgctgctgctgtaccgctaccgcttgctgctgggcctgctgttgttgcagctgatgctgttgctgggcagcggctgcagccgccgcttgctgttgctgagcggcaacggctgcctgttgctgctgctgctgttgctgcACCATCGATTCCTGGTTGGTGGCTTGAATCACAACCAGCTGCTGCTGACCGGCGGACGCTTGCTGCTGCTGCTGCTGACCAGCCTGACCGGCGGCACCCGCACCACCCGCGACCCCACCGCCAGTGCGTTGATTCTGCTCCAGATGCTGACGCTGGTGCAGCATCAGGTGGTTCTTCTGGAAGAAGGCCTTACCGCACTCGCACACGTGCGTCCGTACGGTACAGCCCCCGTTCGGGTGAC…
GSR_IOB_NIMR_725	scaffold00993-scaffold04743-scaffold08342-scaffold00007-scaffold00132	KB665066		GTGATAAGTGGTTTGTCTTTCTCGCGTAAAGTCGGTACAAAGGAACATCCGAGACCGGGTGTTAAGGGCTCTAGACGCCCTACAGTGACGTGACTTTTGGTGCGTTACTACTGACAAACAGATCGAACAGTATCCGTAAACGCGAGTGTTTTCGGTCAGTGCTGTTCGACGGAAGCTGCCTGAGGGCATTCCAGACAACAAGAAGGGAAAAGTGTTCTTTTCAGGAGAAGTGTTTGGCTTGGGTTTTAGCGGTTGCAAATGGCGTGCCGGTGCAAGTGAATGTGTGTTAGTGCGTTCAGCTTGGTATCGGTTCGTGTGCAATTGCGCAGTGGCGCAAGCGAATGTACGTGTACGTGTATGCGCGTGTGTGTGTGACAGCTTAGCTTGGCGCGGATTCTT…
GSR_IOB_NIMR_726	scaffold02999-scaffold00004-scaffold01973	KB665310	AGAP000848;AGAP000848;AGAP000013;	TGTATGTTTGTGTGTGTGTGTGTGGTTCCTCTGCATGGGTGGCTGTTTTCTACGCGCTCGCTCTCCGTTGGCCGCTTCCCGTCACCCCATCCCAGACCAGCCCTGACCAGGGTCGTCTTGGTCTGCCACAGCACAGAAAAAGGGGTTTTGCGCTCGAAGTGTACGCTCGAAGGATGCAGGTAACAAGGAGCGATTGAAGTACACCGCCACACGGAGTACACCATTTTCCGATCGGAGGATCAGGAATCACTCGCCAGGCAGTGGGCCGATGTAAGTGGCGTGGAGCATCCTGCGGAGGACGTGCAGTTAACAAGGGGGAAGTAATAACAACGAGAAGAACACTCAACAAAAGAGGCTGCGTGTGTTTACGTGTGTCAGTGCGTGTGTGTGTGTAAAACA…
GSR_IOB_NIMR_727	scaffold00252-scaffold00139-scaffold18580-scaffold00114	KB664422	;	TTATTATTGGATTGCAGCATTTGCTACATAGGCTGCTCAATTTACCGCTTAGACTTAAGTTAAGCCTAACCATAACCCCAAAACCCCTAGAATTCTGGACAAGAGTCTTAGGAATCCTAGTAATAATGCATTTCATAATAAGTCATCAAATCGTTGCTTGATGGCCTCAACAAACCTGCGAGCTACAGTAAAAACCTATTTCAGCCGAAAACTGAACCAACAGAAAAATATCTGCAACACAAGCTGCATTCGTAGGTCCATCTGAATATTTCAGAGTGATTTGGCTAAAATGTTGACACACATTTTATTGATCAGCATCTGTTTAAACCGCAAGTGTTCCTAATCGGGGATACTGCATGTGTAGCGCGCTACTTGGTTGGCAATGGATGAGATGATATG…
GSR_IOB_NIMR_728	scaffold16501-scaffold02739	KB664643	AGAP009974;AGAP008985;	CTACTCTGAATCACGCTTTTCGACGATGCAATCCGATAGCTTCTGTTCCCGTTCGATGAGTCCCTCGTCAAGCTCGCGTGTACCTTCACTGCCGCAGTGAGGGTTATTCTTGTCCTTGCTGCACTCTTCGTACGATGTTTCGGACTTCTCCACCAGAGATTTCACATCGTCGGCCAGCGAGTCGAAGCATTCCTTAATCTTGGAATATTTGGAGATACTGCCGACCAGGTCGATCGTGGGGTTCATGAGACGTTCCTGCAGGCGGGCCAAAATGAACGACTTCAAGTAATTGTTCTTCGTGCCAACGTTCATGATGTTCTTCAGCAAGTTGTGCACCTGATGGTAGGTATTAACGGGGGATTCTTCGCCACCTTCTGCACCGCCTTCTTCACCTGCACC…
GSR_IOB_NIMR_729	scaffold00092-scaffold03051	KB664345		TATAACGGTACCACTTACCCCCTTCTTAAGATTGAACAGGAACTTGTTCTTATTGTTGCCAGTCTGTCCGATAAAGTTGAACATGATCTCGCGCAGTCCCCGGTACTTGCTCGCGAGCAGTGGCGAATCGAGCGGTGTTATGAGTGCCTGGCCAGCCGCGGGCCGAACCACGGTGAGGCAGCATACGAGCAGCAGTGTGGCCGTACCGCATAGTGAAAGCGTGAGTGTCCTTGCCGGTGCCATGCTTCGAGCCTCTTTAGACCGACTGCCTGAGGGCGGGCGCGGGAGCAGTACGAGACAGAAATTCGAGAAACACGAAAGCGAAACTGCTGACAACCTGATCTGCAACCTTGAACTGGCTACTGCAACGCCTAAATAAAAACAAGAAAGACGCGGAGA…
GSR_IOB_NIMR_730	scaffold00062-scaffold02193	KB664444	AGAP004731	GCATTACTACTTGGCACAAAGCGTAGGGCAGGAAGGAAAGTAGTGGTCCGTTTTCAAAAAGCGCACTGATGCAACGGTCGACGATGTCTGGTGGTGCTTCCGGTTGGTGCTTCAGGGTGGCATGTTGCCCGGCgctgctgctgctgctgctgctgctgctgACAAACCTGCTACAGCAGGCACAAGTTTCGGCCAGTTCCGTTCTAGTGGCCGACTTCCGGATGACGCGGATGGTCGAACTTAGCAGTCGACCTCCTTACTGCAAGATCCACTCTGATCGTGGAGACATTCAGCGAATGTTGCTGGCATCGGACACGAAGAAGGTGCGGCAAGTGCCGCGCGAATCGGTCATAGCACTGGAGGAAGTGTGCGGCGAAGCGAGTGACATTTCCGGCGAGC…
GSR_IOB_NIMR_731	scaffold00048-scaffold04402	KB664356	AGAP004035;AGAP004035;	ATGACAGTTAGCTTTAACCGTGCGGGCAGACAGTTCGGTGTGTGGTTGTGGTCCGTGCTTGGTGTCCTGCTGGCAGGAAGTCAACTCGTGGTGTTGCTGGTGGAAAGTGGTCCCAGTGTTGCGGTTACAACGCTGGCCAATGTGATTGTGCCGGTGCCCGGTGGAAAGCTGGTCGCGGTAACGCCGGACGGTAACAATGCGTCGTCGCTGGAAGGGACCGGCTTCAACGGAACCGACCGGCAACGGGAGGATCTGCTGCTGGACGGGCAGCTGGAAACGGGCACGGTACCGGTGATAGAGCTGAAACGGGGCCAATGTCGGTGCTGGAATTCGACCGAGGAAGCCTTGGGCGAGGTGCAGTGCCGCTGCCTGGGACAATCGATCGTCCGCGTGCCCCAG…
GSR_IOB_NIMR_732	scaffold05080-scaffold02348-scaffold00030	KB664888	AGAP010608;AGAP010608;AGAP010608;	ACACTATTTTTTTCTCCGTTTATCTTCGATTCATGTTTCTTTTACGTCTATAACTGCTTTCCCGCATTTGAATGTTTGCGTGTTTGTCTACGTGAGAGGAATTCTGTTTACAGCTTTAACCAGCTATACTTATACACAGTGTATAATATAGGTAATGTATACTATTATATATACTTTCCCCGAATCGCTACACAGCATTGCCACGATATTGGTTGTGTGTACTGTTTGCCTTACCCGGTATCGGTGTCGCTTTTTTGCCTTTTAATTTATAGTTATATTATCGCAATAATTGCATTATTGTAATATGTATGCGGACGAATCCTTGCGCCGGAAACGCTTAAACCTTCTTGGTGGCCTGGAGCGGGTTTTGCTTCAGCTGCAAAATGATGGAACGCATGC…
GSR_IOB_NIMR_733	scaffold00051-scaffold12237	KB664456	AGAP005324;AGAP005324;	TATACTTCGAAAAGAAGGCATTTTGAATGGGCAGTGGCTGTAGAAGATCGTCCACGGCGTCTGTAGCTTCCTGAATCTCACAAGTGCTCTTAATTCAAATTTGTAAGCTACAGTTAATTCGACTGGTAGATTTATCGCGGACGTGTTGTTAACTGTTTCAAGTGGGGTGTATGCGCGAAACAACGATCAAACTCATGCTCGATGGAATCGACTAACATCGGTTACTTTCTTCTCTTCGTCCCTCCAGTCGTACGTCACTTATGTCACACCTAGGGCCGGCGACTTCCTACACGGAATCATCATGGTACCACCATTTAGTTTTTTTGGGATTTTTGTTACATGTCTTCACGTAAATACCGTTGTCCGGTGGTCGCCTTTTCTCTCTACAGCTGCTCAACA…
GSR_IOB_NIMR_734	scaffold00014-scaffold01967	KB664592		AAAATAGCGAAAAGAAGAAGATTTCCGTTGCTAACGATGAAGTGCGGTGGGGTAAAGTGTGTCTGGGTAGAGAAGAGTTTTGCATTGGGGCGAGTTTGAGCATTGTGTTTGAAGAAGCAACCACATCATATCGATCTGAGAATATCTGTTCTGTTCTGTGGACGTGATATTACATTTATTATCCTTTTTTGTTTGTCTTTTTGCAACCATGTGTGTCCTTGTATGTCTTTTATCGATGGAAGATTCGTTTTTGTGTTTGAACTGCTAGGAAGCTTTCGACTCCTTTTCCTCCTTTTCGAGCGGAGAGGGTGGGCGATTAACCTCTAACACGTTGCCTGCCTGTCGTTTGCCCGGTGGTCGGCTTTTTTCGGTGGGAGAGAATCAGGTTTGGGCCACCGG…
GSR_IOB_NIMR_735	scaffold00112-scaffold01735	KB664877		AAACTGGTAGTATATCCCTTCGCATAACTAAGTGATTTAATGTCGAGCATTGCGAGCGAAAGGGGATATCCCTATCCTCATTCCACTAAGTACAAGCCCCTTAAATCCCTAGCCCTTAAAATTAGGTCATTGGCCGCAGTGACTTCGCATATCTAGAAATATTTCAAGATAAATCCTTGAATGTACAACAGAATCAATGGCAAAACGCAACATCCAGTATTCGTGGCGTTCATTGACTTATTTATTCTTCTCATTTGTTTTTAACGAAGGAACACAGTCTACGATATCCTGCCCGATCTAACGTTACATCCCACCGCTCTGTTTACGCAAATGTCTTGTAGACGTGTGCCATAGAGGTCAGGACCTTGACTTGATCGGACGTTAAGAAATCATAGCTAA…
GSR_IOB_NIMR_736	scaffold02395-scaffold00012	KB664621	AGAP008287;AGAP028019;	AAACGTCAGAAAATATTTACGTGAACTGGTTTTATTTCGTTTTTTTCGCTCTACAAAAGTTGTTCCACCACACAACAGTGCATCGGAGACGATAATTCGCTCAAAATAACGCAAGTTACAGGCTGTGCAATTCCGGAAAACGGTGCTGATAAAGTTTGCTAAAGTTTCGCTGCGAAACATAATCACTGAGCTCGAGATCGAAATGTCCCGATGACTCGCTCGCTGCAAGTGGCCACAGTGGGAAGTGTGCAATAGGGGGTTGAACTCGTTTTCGAGGGTGGTGTTATCATCATCAAACTATTGTGCGTACTTGGGTTGTGATAAAGTGTGATTGAGGGTGCTGATTTGTGGAATCCGATAGCACAGCACAGTCGTCGGTTGTGCAAACAGGCTTCGAAA…
GSR_IOB_NIMR_737	scaffold00017-scaffold06964-scaffold17799	KB664555	AGAP009566;	AGACATAATACTGCCCCCTGGTAAGCCCCCGTCGCAGACGAACAGTGTTTAACAGTGAAGCGGGTTGCGAAGAGCTTCAGCAGCAGCGCAGCAGCAGCTCCGGCTCCGGCAGCACCAGCAGCAGCATCACCAGCAAGTAAGCAGGCAGCAGCAAGCGGTGCAATTGAAATAATTTTGCAGAACCTGTAGCCGCGCGACCAAGTGTGCAAGTGCAATTTTATATTTCCCAAAAATCCCAACCACGCGCGTGAGTTCCTCTCACTACTACCACACAACACAACAAAAAATAGTAATGCCCAGTGAAAGAGTGCGTGTGTGAGATTGCAAAGTAAAAAAATGCGTGTGTAGTGAATTAAAAGCGAATTTTTATTCGAGTGCATAGTATTTCCATTTTCCACC…
GSR_IOB_NIMR_738	scaffold00798-scaffold00322	KB664511	AGAP012144;AGAP012144;	ATAACAAACAACTATTTTTTTGCGCTGGCTACGTGTTTTGTTGGAACGATATCTGTACGGGCTGCTTGAAAATCCTGCATGTTTGCACAGTTGTATTTCGTTTTGGAGTAAGATTGTAGACTACCCCAAAGAAAAAGGACACCCTCAGTAGCAAACTATGCGGTTTCTGGATTCCTTGCGAAGATTAGATGCTTATCCTAAGATAGACAATGAATTTAGCATACGCACAGTCAGTGGAGCGGCACTCACGCTGATCAGCACGATCGTAATAGTTACCCTAGTGATAGGCGAAATCAACGCCTACCTTTCGCCCAACATTTCGGAAGAGCTGTTCGTGGATACGACACGGGGCCACAAGCTTAAAATCAATCTAGATTTTACCATCCCGAGAATATCGTG…
GSR_IOB_NIMR_739	scaffold00111-scaffold05526-scaffold00139	KB664422	AGAP005350;AGAP005350;AGAP005352;	ATGCTTTCTGACGGTACCACCCACAAGGTAACGTGTGCCGATGAAACGATGCACGTGGATGTGGCCCTACCGTCGAACAACTTCTCCGACGAGTCCGTCTATCTCGACGGTATGAAGGGATATCCGGATCCGAAATGTAAGCCAACGATACGGGAAAACCAGGCCGTGTTTGAGCTGTCCCTTACCAACATCTACGATTGTGGTGTTACGCGTGTGATCAATCAAATTACGGGAAAGAAAGTGTTTTACCATCGGATCATCGTGGAAGCAGGTCCGGAGAGTGGAAAGGAGATTGTGAGCGTGAAGTGCATCACCACCGGGCCTAGCTACAATGTGACGCATGGCATCGTAAAGCGGGATGTGCTGCCAGCAGGCTTCCAGGAACCGGAGGATCTCGAA…
GSR_IOB_NIMR_740	scaffold00056-scaffold00850	KB664301	AGAP004176;AGAP004188;	AAGTTACTGTCGTTTTCTTACTACAAAAAAAAAACTCGATATAAGGCGTGTAAAATTTCTTTCCCGTCAATCGCAATTCCACTTCAATTATCCCACAGTAAATGCACTTTATTGTAGCTTAACGGACGGCCAACCGCTGCCAACCGTGTGTTGTGCTGCAGTTTTAGGTCCCGCACGCACACTACTTACAATTTAGCTATTATTGGCCACAAAGATTACACCTGATTTGATGTGTGTATATTTTGCCCTACTAATTAGTGTTATCGTGCTGCTTTCCTAATTATCAGTACAAAAAAACTATCACTATGCACAAAGCTACTTCTCACCTTGCCGTGAGAACCTGTCGACCCTTAAACGCTACCACACACGATATCACAGACTAAGGTAGTAAAAAGGTGT…
GSR_IOB_NIMR_741	scaffold01404-scaffold15970	KB665184		AATGCGCTTGGGAAAAAAGGCAGAGTGAGCGAGGAAGCTATAATCACATAGGCCATCAAAGGGCTGTCTCGTGACCCAATCTACAACTGCTTGATCACAAGAGACTACAGTGATATCAATGAGCTAATAGATTTCATCAAACGTCGCGAAACGCACTTTCTGATACGCAAAACACCAGATAGCCGAAACCCATCTACCTACAGTGTGAATGCTTCGAAGTCGAACGCAGGCAAAGAGATGGCAACAGAGCGAAGCGGACAGAGATGTTACAACTGTTCGGACTTTGGGCATCATGCATCGCAATGTACAAAACCACGTCGTACTCCAGGTTCCTGTTTCAAATGCGGAAGCACAACTCATATCATCCGCAATTGTCCCGAGAACACCAAACATTCACCA…
GSR_IOB_NIMR_742	scaffold00091-scaffold02125-scaffold01723-scaffold00764-scaffold00180-scaffold01192	KB664661	AGAP011618;AGAP011618;AGAP011618;AGAP011618;AGAP011618;AGAP011618;	CGAAAGCCGAAAGCGTTGCCGAAAATGTCGGTTCGCAGAGAGCTCCGACCGGGAATTCGTAACGCGTACCGTTTCGTTTCGTTTGGTTGGAAAGGAAAAAAAGCATATCGCATCCGCACTCGCACCGCTGCCGGAGAGAGCATTTAGTACGGTCGTGACGTTCGCTCGTGACGTTTCGCTGTGTGTGCCACGGCAGTGAGTGCGTGAAAAAGCGAGGAAAATCCGCGCGTGATCGCTGCTACGGTAGGGTAGGGTTGCCGTGTGTGTGAGTGTGTGAGTGCTCTGGGTGGGCAAAGGTAACGCGCGCGTGTGTGTGTGTGTATGTGTGGCTGGGTGGAAGGAAATAGTTCTGAAGGGGGAGATGGTGTGTGGAACAGGAATAGCGAATTGTAATGAATA…
GSR_IOB_NIMR_743	scaffold00052-scaffold09420	KB664515	AGAP009013;AGAP009974;	GATTGTATTCTATTGGTTTTAAACAACGTAACACTTTTTGAATTGTTTATGTTTTAATTCTTGAAGGAAAGCTTGACCGTAGTGCTACTTATTTAAATTACAAAGCTGAAGTTGATAAAGGAAATAACAAGTACCTTGTACTGCAACACGACACTCTACTTTATTCTCGCATTTTCCATCAACTGGCAACCGTTAGCACTTCACAACCTTCATCAGTGATGAGAACAGTATGCTCGAACTGGGCACTGCGAGCATTGTCCATCGACACCGCTGTCCACATATCCTCTAGCACTTCCGCCTCGCACGTGCCTAATGAAAGGACCGGCTCAATCGTAAACGTCATACCCGGAACCATTACACCAGGGTAATCATTATCGAAATGAAGGATATTTGGCGGTC…
GSR_IOB_NIMR_744	scaffold02482-scaffold00007	KB664921	AGAP008985;AGAP008985;	CCACACAACCATATGCGCCGACCTGGTCTGCTGTGCCGTTCATTCTGTCCTTGCACGGGGCTCGTGGTGGTGTGGTGTAAATTTGGTTGCTATTTGGAAACAATCTCTCCCTCTTGACGAACAACACCGTTTGGGGAAACGTTTTCGTTGGCAAACAGTTTGCACCGGCCTGCTAGGGACGGAATCGGTGATTTCGGGCAGTGGCAAGCAATTTCGGAAAGAATACCCCATCGTACTCTAGCGCCATTGTTGTGCTTCTTTCACAATGGAGGAAGTGGTGACGATCGAAAGGTTGGCGGAGGAAAAGAAAAATAGCGGCAACGATGAGTACAAATCGAAACGCTACGAAGCTGCCCTCCGGCTCTACTCGGAAGCGATCCACCTGAGCCCCAAAACAGC…
GSR_IOB_NIMR_745	scaffold00018-scaffold00320-scaffold00021-scaffold00184-scaffold07774-scaffold00031-scaffold00004-scaffold00060	KB665354	AGAP011566;AGAP011566;AGAP011566;AGAP011566;AGAP011566;AGAP011566;AGAP011566;AGAP011566;	CTGCACGGGCTGGTTCGCAATCACCAGATTGCGCATCGCATGCTGATTGTTCTGGTTCACAACCAGCTGCTGCTGACCGGCGGACGCTTGCTGCTGCTGCTGCTGACCAGCCTGACCGGCGGCACCCGCACCACCCGCGACCCCACCGCCAGTGCGTTGATTCTGCTCCAGATGCTGACGCTGGTGCAGCATCAGGTGGTTCTTCTGGAAGAAGGCCTTACCGCACTCGCACACGTGCGTCCGTACGGTACAGCCCCCGTTCGGGTGACGACGGTTGTGCAACATTAGCCCGTGCTTGGCCGCGAATCCCTTGCCGCAGTGGGTGCAGTAGTGGGATTTGGGTTTGTTCTGTGCCACGACAACGGTTtgttgctgctgttgctggtgttgctgttgctg…
GSR_IOB_NIMR_746	scaffold00246-scaffold09024	KB665200		TTAGACCGTCGTGAGACAGGTTAGTTTTACCCTACTGGTGTGTGCTAATACGTGCTATCGTAACGGAACTCCTGTGCAGTACGAGAGGAACCACAGGTACGGACCACTGGCTCAATACTAGTTCGACCGGACTTTGGTATGACGCTACGTCCGCTGGATTATGCCTGAACGCCTCTAAGGTCGTAACCAATCCGAGCTGATAGCGCTTCTTAAAACCTAATGGGCAATCGGAAGCTAGCGGGCCTAACAACCCTCCGAGATCCG
GSR_IOB_NIMR_747	scaffold03556-scaffold00346	KB664694	AGAP005229;	cacaaaagattctagaagggggggggggggccttctccagtgttttaccGTTTTTGTTCGTGACGTCCGATGACGACCTTGCGCGTTGCTCGTTTGTCTATCTCTTCCCTTTAAAGACGTTTTACAGTTGCGCAAAGACCGTGAGAGCACTATTTTTAGACCACCGCGACAATATTGCCAAAAGAGAATGCGAAAGAAGGCGTCAGTACTGTAGCAGGCGCCTGTAGCAGGGAACCACCGTATTTTCTACCTCTACCTGCACAGCCTACCTTGCACGAGCATGTTTTGCAGGAGCAGCAATCTTCGCTACCTCTGGCTGCAACTCCTCCTCAGTCGAGCCAAAGAGGCAAAGAAAATGCTTCGATCATATCGGATGTTGGACAACGACAATCAAAGTCC…
GSR_IOB_NIMR_748	scaffold00038-scaffold06093-scaffold05033	KB664509	AGAP013380;AGAP013380;AGAP013380;	AGCGATTCCGTTCGCGCTAGTATTAGTATTGTGTTATCATTGATTTATTCGCTTAATCCGTTTTTCGCTCTTCTTTTCCTCTTTGTCAGCGGTTAATTTCAGTTTTGTTTCAGTTTCTTAGTTTTCCTCTTTTTCCCCCCACCCTCCATTCCTTGTCTGCTCACAGTTTCTCCTCCTGTTCGCTTCTACCTTTCTCGTCCTGCTTATTTGTGTGGGTGTTGTTGCCTTTTTTTTTCTTCGCATTTATCGCATTCACATGTTTACGTTTTTAGTTTTGGTTGCTTTTTTGCTGTTGTTGTTGTTTGCTTCTTTCCTTAGACTTGTTGTATATGTGTGGTAAATGTAAATGTAATGGTACGCAATTTTGTTTCTTTTCATACTTTGTTATTTTCTTCCTTT…
GSR_IOB_NIMR_749	scaffold17065-scaffold06797-scaffold21280	KB664635	AGAP002279;	GTAAGTAATGGGGCGTGAAGCGACGGTGCACACGGGATTGCCAAACGAGCCGGCTTTTCGTGCTTCAATTGTGATAAGGTGATGCGTTCGTGGAATTGGGAAGATTGTTGCGTTCCAGTAGCATGAAGTCATTGTGATACGACATCAGAATCATTGTCAGTGACTCCGGATGAGTATTTCTAATGTAAAAAGCGTGTATTCACTGCGAAAACATGCGCGAAACCGCGATACTGGGTCAGTGTAATTTAGATCAAGTCGCGTGAGATGATCCGGTGCGGTGGGCTAGCCTCGCTATCGTTCGCTCTCACTTAACCGAGGCTCTCTGTCTCTCTCTCGCTATACACAACTCGACATCGTACGATAGAAATATGTGCGTTTGCGCTGAAAAGAAAGAGGTGG…
GSR_IOB_NIMR_750	scaffold00067-scaffold03595-scaffold01609	KB665221	AGAP010778;AGAP010778;AGAP004438;	CAACCTATGCCTATCTAGTGGATCACCGTAGACGTCTCTACCCCTCCTATATACAAGTTCATCGTAACGCGTTCTGTCCTCGGGGAAAATTAATTCCCTTATTTCGGTCACTAACGTATGCTTTTCGGGTGTATCTAACATTTCTAATAAAACAGATACGAAGGCCTCTATGGTCATTCCTCTAGCACCATATTCCGCTATATAATATGATAGGTTAGCAAAATGATGACGAGGTAATAAGGATCTGGCTTTTTCTTCAACCATCGCCGACACCGGACACTTCCTGCGCGTTCTCACACCGGTCGGGCTGTAGGCGTCCCACGGTTCCGGCTCAACGGTGGTACACGAGTGTGGCACTTTCCCGACGTCACGGACCAGCAGCGACATTCGTTTGTGGAA…
GSR_IOB_NIMR_751	scaffold02228-scaffold18493	KB665120		AACCATCGCTGGTAACTCGATTGCATTCCGCAAATATTTTCCATCTAAAAAATTGTTTTATCACATAGTAACAATTGACACTCTGGAAAATGGAGATTGGTTTGTTCCGTGCCATCAAGTTCTTTGTAATAATATTATAATAGAGCCTGGATTATATAAATCAGAAAACAATAAGTCTACCGTAAAAATCATAAGCAAATCTCATATTGCACCAACTATTACGACAAGTTTTCATCTAAATGTAAATAATTTTGAAACCATTAACCCTATCCCATTAAACATTGATGAACCAATTGATAAAAAAACAATAGAAATGTTAATAAGGGTTGACCATTTGACACCTTATGAAAAAGAAAACCTTTTGGATTTAATATTAAAAAATCAACAGGTACTCCTCAA…
GSR_IOB_NIMR_752	scaffold00166-scaffold00141	KB664750	;	TGCAACCGAGCCATCGGTGTTTCCTTTTATATGTAAACGGTATAATGTTTCATCTAGTAGGAGTTGAAAACAACAGGACATGTGTTAATTGAATATCAACAGGAACAGGATAGGAAACAAGAAGTTTGGTTCAGATATGGTAACCTAACGTCCATCCAGCTATAGCAATATGAATGCAAGCATTACGACAGTGCATCAGAAGCTTCTGTAGTATCAACAATTTCTCTCATCAGGCAATATAACTGTAACTGCAAAGTATGTAACTTAGATGATGTGACTAACAACGGTTGTCGGAGATTTGACTACAGCATTAAAAAATAGGCCCATTTTTCCAGTGGTTTGGATCACTTATCATTCATAGCATGTATTTTTTTATGAAAAACCATGTTTTACAATTTC…
GSR_IOB_NIMR_753	scaffold00077-scaffold04924	KB664468		ACAGCAATAACAACCCCTGTTTCGGCGACAGCCAAAACAGCACGCGTCCTGTCAGAATGAAGATTGCATAGCTGTCTTCAATGTTATTTACCACGCTGAGCTGTTGGCGGCGATCTAGTATTCATTGGTGAAATCCGGTCAAACTTAGCACAACAGTGGCACAATGAACGATCCGTTTAGTTTGTTAATCCCAACGGAAGACGAAGAGCAGTGTGAAGCAGACTCGCTCGATATACTTGATGGACTGGATGATCTGACCGAGCTGGGTGATTATGTGCTAGACTTAATAGATGCGGACAACAACGAACCCACATCGCGGACACCCGTTTCAAACCCTGAGGTTGATAAAGGCTATCACTCCTTTTCGGAGGATCCATCATGGGAAACTGAATACTTTCC…
GSR_IOB_NIMR_754	scaffold00059-scaffold03600-scaffold00118-scaffold19008	KB664514		GCAATTTATAAGCGTCTTGTTTTTGAAGAAGGATAGTAGCACCGAAACCAGAGGAGCTTGCGTCGCAATGAAGTTCGGTCTCCCGTTTTGGGTCAAAAATAGCAAGAATAGGGGAATTGATAAACTTATCGCGTAGGGTTTCAAAGGCTTGAACGCAAGTGGTATCGAATGCGAAAACTGCGTATTTCTGAAGGAGTTTTGTCATAGTTTTAGCTATACAAAAGAAGGAAGGAACGAATCGACGGAAATAGGAATATAGACCTAAGCACCTTTTGAGTTGTTTTACATTGGTGGCGTAGGGTAATTAGAAAGGGCTTTAATATGCCGAACACAGGGCTAAATTCCCGAAAAAATGGCTTTATAGCCCAAATATTCGATTGCTTCGTGAACAAATTTACA…
GSR_IOB_NIMR_755	scaffold00055-scaffold05479	KB664551	AGAP001958;AGAP001958;	CGGAACAGCAATAACAACAACAACATCAGATGGTGAAAAAACAACAACAGTCACCACCATTTGATAAACCTGTTCACGTTGGGCAAATTACTGTGTGAATCTTTTCGCGCGGTTGTGTGCGTCGTGTCGTGTGTCTTTTTCGAAAAAATATATTTTATCGCCTGTGCAAACAAATACGCAGTTGCCGTGGTTCGATAAGGAGTCCGCTAGGCGGCGCGTGTAAAGAAAGTGCGTGCGTGCGTGAGTGCGTGAAAAAAAAATGACAATCAATAATATATTGTGGTTCCGCCATGGGCTTCGGTTACACGATAATCCGAGCCTGCTGGAAGCGCTCCGGAGCGATTGCATGAGCCAGTCCAGCGAGGCGGTGAAACTGTTCCCGATCTTCATATTCGATGG…
GSR_IOB_NIMR_756	scaffold00001-scaffold00527	KB664666	AGAP002279;	TGGTGGTGGCGCTTGCTGTCGGGAGCACACGGCTACCTTCTGGCGCGAGACGCGGCCACAGCACGAAGTTATATCTGACTTGGTTTGTGGTTCGCGCACTGCAGTCGCTGACGGTCAGTTCCCCGGTGCGGTTGTTGTTGAACCGTTGTCAGCAAAACATTTCGCGTGCAGTATCATCGTGTGACAGTTGAACGTGCAGTCCGGCGACTTTTGTGTGAGCATTCTAAGCATTTGTTTACTCTTAGTTCGTAATGTGTGAGGAAGTGACAGTAATCGTAGAGCACAACACAAAACTATCACCAAATTAGAACCTGCGGTGTGCTTAAAGTGATCGTACCGAAGGTGAATGACAAGAATCGTGATCGAATAGGACAGTGCATATAGGACACGTTCGCTCAC…
GSR_IOB_NIMR_757	scaffold20817-scaffold00002	KB664367		CCGGCGCCCTCTTCGGTCTTGGCATTTCGTCCTTGTCCAGTAGCAAATGTGGAGCCAGCACCAGAAATAGCTGTTCAGCCCACCCTGGCAGGCCACAGCTGGCAAAGGCTAATTGCCAACATGGTAGCCCGAGATGCACGATGCACATGCGTA
GSR_IOB_NIMR_758	scaffold00047-scaffold03870	KB665176	;AGAP000351;	TGTGTGGCACGAAAACGTAAAACATGTTTCATCCTGTCGTTAACCGTCGATGCTGGATTAACCATCTCCTAGCAAGGGCTTATGATTAGTACGAGAACGCGAGGCAAGGCAGCAACACACACACACACACGGTGCACAACAAAAGACTTACTGGCCCGATTCCAACAGTGTACCATACGCGTTAGTTCCGTGCCCGTACGTGTCGCGGCAGTAAGGCGACCACCAAAATAGGCTCCCACGCGGCCCAGATCCTGCCCGCGATGGAGAAGGGCAAGGATGCGGTCATGCCGGTGGTACCACCGTTGGATAATGCGGCCGCCGCACAGATCGTTTGCCGCTTCTTCCAGTACGGTACGTGCCGGTTCGGCAGTTCCTGCCGCTTCATCCACCCTGCCGAAC…
GSR_IOB_NIMR_759	scaffold00109-scaffold03465	KB664419		ATCACACGAATCATCAAAAAATATATACGCCAGTGTGTCCACGCGGAAGTGAGAATATATTCGATCGGTTGAATAAATAACACTCACCTCGTTCCAACACACAAGCGCATATACTCGAACGCACACACACACGCACATACACACGGCTCATTCCCCCCCCGTGCGTTGAAGTGAAAAATACGTAAAAGTGTGAATTAATCTTGCGAAATAACATCCTTTTCTCTACTGCAGAACATAGGGGCTTATGCGTGTGCATCATAGATTCCTGCTGCAAAAGTGGAATAATTCCAATGTGTGCTGTGATAGCAATTGCTCTTCAAGTTGGGTGGTGAGAGCGGCGCTTCTTCCTCATCTTCGCGGTGTTCCTGCACGATTGTCTTGTTGTTTTTGCGTTGCATT…
GSR_IOB_NIMR_760	scaffold22902-scaffold07073-scaffold00041-scaffold21741	KB664527	;	CTCTGGGAGGAGCCTACGCCTTTTCCAGGCGTAAGAAACGGCAACAGAGCGGTGAAAATGTTAATTAACAGGCCCATTCCATCATACATCACCATAAAGGGTGAGCGGGGTAGGATCACATACCGCGGGCAGGAACAAACCTGCATGTACTGCGATCAAATGGTCCATTACGGTGTTTCCTGCACACAAAACAGGAAAAATAACAGCCAAAAGGCATCAAGTGTCAACCAGCGCCTATACTCGGCAATAGTACAGGGCAATCACACTACGGCCAAAGAAAGCTCAACTGAAAAAGTGGTAACCACAAAAAGTATCCCCACCCAAGCGGGTACAATTACTAGAAAAAAATCCATTGACGAACCAGGCTGCAGCAAAGCACTGGAACGCATAGACTACGAA…
GSR_IOB_NIMR_761	scaffold00187-scaffold00092-scaffold05144-scaffold16582-scaffold01930	KB665210	AGAP006366;AGAP006366;AGAP006366;AGAP006366;AGAP006350;	ATCTTCTGGTTGGTGGAACCGGCACATGATGTCATCGAGGGTGCCGACTGTAATCTGATCCAAATCGTCGTCCACCGACGCACCGTTTGTTAGGACAAAACAACGGTCAAAATGCATCGCGCAAGAACAGCACTCCACATGGTGAACCCGATGGGTCAGCAGAACTTCGGAGCATTTCTGCTGAAGAAACCGGCGTCGAAGCTGACCACCGAACTGGTTGCCGCTTCGTCCGTGAAGCTTTACAACTCCGCCGCAGCCGAACCGTTCCTGAATGGTTCCTCGTCAAACTACATCGACGATATGTACAATGCGTGGCTGCGGGATCCAGCTTCCGTGCATGCGTCCCGTGGGCACCTGGTTGCGGACATTGATCCGCTGGGCATTCTGAATGCCGAAATC…
GSR_IOB_NIMR_762	scaffold19467-scaffold00005	KB664289	AGAP007325;AGAP007325;	ACATTACTTAATAAAAAAGTAATGACAAAGTGAACACACACGCACACACACACTCGCGGGCGCATGCATTGTGTGTGTGTGTTTCATCAAATCTGCACACGCGCATCATTtctctctctctctctctctttctcGGTTTCTGCGTCCATCTATATATATATATACCTTTCGTCTTAATCCTTATCATTAACCACACCTGCATGTATGTGTTCGCGCTCTGCGTTTGTCCTCTTGTCGAGTGCGTGCGTGCGTCTTCGTCAGCGCACATCCTCCTCCTAGCATCTTAGCGACGGTCGCGAGATCCACTGCGGCTGCGACGGTCGCGATCGCGCTCACGGCTCATGCTGCGGCTGCGGGATCTGGAACGACGCGGTGAGCGAGATCTGTACGAGCGGCGGG…
GSR_IOB_NIMR_763	scaffold03434-scaffold00010-scaffold01982	KB664441	AGAP006653;AGAP006653;AGAP006653;	CCAGCCGTGGTTGGCTGTTTACGACGGCACTGTCAAAATAAAGTTGTTTACGAAAAAGTGCTTGCACAACGTAAAGGTTAAAAAAGTTAAGATAGGGTAAAAGCGAACTCAAAACTCTCATTACGTGTGAAAGTGAAAGCCAAAACGCGGATCGAACTGGTTCACCAAACCACACTCCCGGCGGAAGAGTGGGAAAAAAGTGAAGGTAACCTTCTCGGACCAGCTCGATACGGCCAGTACCACCGGTAGTAACAGCAGCGTACCGAGCACACCGAGCCCCTCCGTATCGTCCGCCCAGCACCGGTGGCGCTATCTGGAGCAAATCTTCGCACCGTCTACAAGCGCAGCAGCAGCAGCAGCACCCCCGGCCGGGAATCGATCTACGGGGTCCTCCGAGTT…
GSR_IOB_NIMR_764	scaffold00006-scaffold14887-scaffold15139	KB664465		TTTCATTTCTAACGAGCACACCAACTGGCTCGGTGTGTCACTTGTTTCCGGTGATTTTCCGGTCGGAAAACCGCCCCGTTCTTCACGCACTTTATTCACAAACATTCACAATTTTTTGGTACAAGATTGTTGCGCTTCTCTACTATGATACATAAGCTTCCGGTCTCTCACACACACACACGCAACCTCCTAGTTTAGTGTTCCGTGTGGAAGGGGTTATCGATTTTCTCATCTGGCTTACTTTACACAAAACACGGAGCCCACCTTCGTTCTGACTTACTTCCTGGCACCTGGTTTACTGACTAACTATTTACACGCACGAAGCTTTCTCAGTCCCAAATTTGCGCAACTGGCAGACATTCTTCCTTTCGAAGCCTTTCTTTCTATGATACAATTGTG…
GSR_IOB_NIMR_765	scaffold07254-scaffold04526	KB664448	;	CGTCTTTACCTAGTGTAATAATTGTATAATATTCAACGATTTGCTGATAAAAGTGACCAGGAGTAGAGCTAAATAATGAACACCGAAGAGGAAGAGCAACAGCCTACGAGATGTAACTGTGAGCAGCGTACGCTTGCCGCAAGACTGCTTTTACAGCAGATCGAACGTCTCTTTCAACTTCCCGGATGTGAACAAGTGAATCGTACAATGGTGCCAGCCGTAACAGCTAACCCTGCGCCTAGGAACTACTACACTCAGGAATCAATTTTACCCTATCTGAGTAAAATTAAACAATTCCGTCACGATATGGATGAGCCGGTCCCGTTTGCCGAATACCACGCTAAGTACAGAACACTGCTCGAGGGCAACGCTACGCTGAAAAACCGTGTCTTGCAACAG…
GSR_IOB_NIMR_766	scaffold00110-scaffold03671	KB664433	;	AGCCGAAGAAGGATATAGATACAGGACACAGTCGAAACAACAACGATAGACTATAGAGCACTGGGTGTGTAGTAGAAGAGTGACAGTTTGGAGGTTGGCGTGAATGCCAGACGACAGTTAGTTTAAGTATTGAAGTGGGATTAATAAGACAGCAGCCATAGAGTAGGTAGGTAGGGTGTGAGTTAAACGGCGAATAGGTGAGATAGCTTTAGACAACGATAGAAGATTGTTTAGAAGGGTACGTTCAATGTTTTGATATGAGATATGTTTTGGGCTGAGAGAGGCTGTACGCATACCGAGGGAAGTGTTTTAAGAAGGGTAACAATTTTATAATTTTGTACGCTTTTGCTGATGTAAATGGTGTTCGATTCATTTAAGTAGTTTTTTTTCTTTTTTTCA…
GSR_IOB_NIMR_767	scaffold00001-scaffold00017-scaffold00100	KB664555	;	CCCGCAAACGGTGCCACCCTTCTGAATCAGCTGCAGCAAGCGTGGCCGGCACTAGTTTACGACGGGGTGTTTGTTGTGCAGTTCCTGGTAAACGGTTGCGTACGGCTTCTCCGATTATCTGGCTCGATCCGGTTGGCCGGGTGGCTTGATTCCGTTTCTCCGTGAGGTTATGTTATGGGCGATCGATTCGTTTCACTTCGACTTGACCTCGTGGGTGCTGATATGGGATATGGGTCCGGGATGCTGCTGTTGGCGAGGGTGGAAAACTAAAGAGGTGGCCAAATATGTTTTACGTTTACAACACAAAAGAAACTTTATTAGCACATTCGATAGCTGAGATGTTAGTCGTGTCGCAGAGTTCAGAATATACAGGAAAAAGGCGCGTTTTCCATAGCGTCG…
GSR_IOB_NIMR_768	scaffold00017-scaffold00043-scaffold00037-scaffold04908	KB664766		tgcaccaccgtttttgatcagttcggctactattccgtcggtgcctggtgccttgttgttcttgagccgacggatggccatacgtgtttcaacaatgttaggtggcagtagcatgatatcatctgctagtggagcctctagctgttggttgaactgatcatttagcaattcTACCCTCTCttcagaatcattttaatagagcctctcgtaaagcggatttgaatgcctgttggacgtgactgtcctttagggagtccgtgttgagccgagcctgcgtgttaactccgcccccattgacacggggacgggcgattgtgcaacgaatcactaagccaaccaaatagtgatcggattcgatgttggcccctcgaaacggtctgacgttcagcaagctcgact…
GSR_IOB_NIMR_769	scaffold06110-scaffold15240-scaffold00123-scaffold18402-scaffold00141	KB664427	;	ATGGGATCGTATGCTCATATAGCGTTGGATGGTGCTTGGATGCAGAATTCGGTTACTTCACGTGGGAGAAACATCACCAAATGCCGTGCGAATGCCTGCGGTTTCGACAGCTACGTCACAGACCACCCACGCATCTTCATACTCGAGCTGAACGGTTATCAATCGCCGTTCAAGCGTAAGGCGGAGAACGGGAGGAACTTGGATTTATTCACCTATTTTAACTCCAAGATTACGCTGGTGGAAAGTTACCTGGGGCAACAGCTAAACGACGTCTACACAACGGTGATGACCGAAATGTGCAAGATCGATAAAGCCATATTGGAAACCAAATTAACACTCGCACGCCTCAACCCTAGCGAGTTCGTCTCAAATTTGGTCAAACGTCCCGGATACACCGCA…
GSR_IOB_NIMR_770	scaffold00053-scaffold00074	KB664543	AGAP009431;AGAP009431;	TTTTATTCTTCGAAGGTATGGAGTATATTTTACCATTGAAATACTCTAGCAAAGCAAGACCTCATACATTTCTCTCACAATTTGTCATCGTATTCATGGCAAGCAATTAAGCACTCATCGTACACCGGGCTCAAAGTTATGGTTGTTTACGGAATTTTATTCACATGCCCCACCAAATACAAAGAAACTGTATTTAATAGTTCTTAGACAGTAGACCGTCTTTCTTGGCCAGACGAACGATGCAGTCGTCCGATTCACCCATGCGACGGATCTCACCGCAGATGGCGTACACCTTGGACGTGTCCAGCATGCGGCCAGTCTCCGGGTCTACATCGACGATGTTGATCTGGATGGAGGCATGATCCTTGGCGTGGATGATGCGGTTGCTCGACGAGCACT…
GSR_IOB_NIMR_771	scaffold01737-scaffold00058	KB665188	AGAP001094;AGAP001094;	CTGTACGGACGTGTGTGCGTGGATTTAATTAACCCTCGAATATCGCACGCGTCCTCTATAGCCTGGGAAACGTTGATAGTTGGGCCTAAACGGCTGGACGCGCGCGCTCGGTATCGATACGGTGCGTGTGTATGCAAGCGTGTGCCTACATTCAGGCGCAGCGTACTAACTGTCAGGATAACAAACAACGGAGCGATCGCAAGCGATTGATGTGATTTATGCTAGCAGATTAGCTCCAGCAGTGTGTGTGTGTGTGAGTGGAAGGCATAGATTTAGATGTACATAGGCGGGAGCTAGCACCCCGCTGCTAGCCGTACATGCCTGCCTAAGGACATTTGCCAGTGAGGACACACACTCACACAGACGCCTAGGAGGCTGGTGAGGAGGCGTTTGTGGTGA…
GSR_IOB_NIMR_772	scaffold01605-scaffold01007-scaffold00023	KB665176		TGTATATATACATATATTTGAGTATGCTTTCTTTTCTTCGTAATCGCTCCATACTACAGTTCCATACTGTGAAATGTTACAGTTAGTGTTGGTTGTTCGTTTCTCGTTCTTTGTTTGTTCTGTTGCACTTAATCTTCTAGCATTACTGGGCTTAGTGATTCTTTTTCCCCCTCCTCTCGCTTCTGCTGTATAGTTATGTGTGTGTGAGTGTGGGTGAGAGAGATTTTTTCTTCTTGTTGTTGTAATAATTGGTATGCGATTGTTCATTCATTTATCTTAGCGTACTTCGCTAACCCGTTCGAAATCGTATCAAATACGCAAAACAAACCCCTCCACCCCCCCCCCCTCCAACCGCATAAGAAAACTGCCAAAGGTTCAATCACCATCTCCCATTTTTTT…
GSR_IOB_NIMR_773	scaffold00028-scaffold01457-scaffold05670	KB664499	AGAP010715;AGAP010715;AGAP010715;	CAAGCCATCATCGACCGTTGCAATTTTTCAAACCTCAACAGCCACCCAACGAAGACGCCACCACGGAACAAAGCGAAACCATCGCCCCCGAGTGTTCCTCAGAAAGTAGTGCAAACAGTCGGAGTTGCGAGTGAAATTCTGTGAAATATCAACGGAAAAGCGTGCAAAACTGGTTGAAATCATATTTTTTGTGCATATTTTACGAGGGAAATGCAATAATGGATCCTTTCACACAGAACATACTCGAACGCGCTGAAAAACGTGCGGCCGCCCTTGGTATTACGAACACCTCCAAGTTTCCCCTGTCGGAATATAACTACGAAGCGGACAAGCAAGCGGCGGGAGCAGCTTCACCGAAGAAAAAATCAGCCGCGAGAAAGCACTCAGCACCGAAACCGC…
GSR_IOB_NIMR_774	scaffold00412-scaffold00034-scaffold03801	KB665043	AGAP012010;AGAP012010;AGAP012010;	CCGCTAAGCTCGTCGAAGATGGACGTGATTGTGAGTGCTGCTGCTGCTGCTGCTCCTGCTACTGCTGGTACCGGTGGCAATCCGCCGGCCACCGTGTCGCTGCCCGCCACTGCCCCGACCGCTTCCGCCGTGGCCGCGGCCATCGCGTCCCGTTCGTTGCGAGTGCGCACATCGAGCCAGAGCGGTGGCAAGCAGTACGGTGAGGCGCTGAGTGAAATCCAACTGTGCCCGAGCGTCATGTCCGAGGGGACGCGCAAGATGCTGCCCCCAACGACGGAAACCATCCAGACGAAACCATTTCCTATTCGGGGTGAACGTGCCAACTATGTGAACAGCCCGCATGTGATTGCGATGGTCGGACTGCCGGCCCGCGGTAAAACGTACATCTCAAAGAAACTG…
GSR_IOB_NIMR_775	scaffold00005-scaffold19510-scaffold22168-scaffold01780	KB664289		ATGGAACCTAAGTTCGGTCGGTACATCAAGTTTAACGGCTGCCTCATAGTGCTGGTGGTCGGATTTCGTGTAATTGTAAACGCACACCAATGGGTGGTACAGTTGCAGAACTGGCACGAGTATCCTTTCCCGCAGGCACTTGAAATGCGCAATCATCCCGTCGTAGATGGAGTGTTTCAGATTATGTGGATTATTGCTGTTACCTCGTTCTATCAGGCACTGTGGCTGGAAGTGGGGATGTTGCTGTACCCGATCGGTTTCGTGCTTGGCTTGGAAACCCTCATTATCGCCACTGGAGACGTGATCAAGCGATGGAACGGTGATGCCGAGGATTGCTTCCTGCGCAGTGGTCAAGTCGGGGTCTTGTGCTTCGCCGTACTGGTATACTTTTACTACACT…
GSR_IOB_NIMR_776	scaffold00127-scaffold04309-scaffold00062	KB664442	AGAP004805;AGAP004805;AGAP004805;	AAGATCGCGTGGTGTGACGCACTGTCGCTGTGAGCCTGTTTTTTTGTTCTATATAAacggccaggccgttcttcatgaataaaaaaaaaGAACATAAAAATTGTAATCTTGCAACCGTTCAGATTTTATGTGCTGTGATGTTTGGCGTGTTATCTGGTGTGGCGCTCGCTCCAACGCAGCTCACAAAACCGAGTTGGTACCGTAAGAAAGAACTCTAAATGTTGTGCATGCGTCGTTAATGTTCGGTGGAATCAACAACAGTGAAGTGCTCTGTGTGTGTACCGTTTGTGTTGAGATGTGATTTAAGGAAGGCAGGAAATGTGCCGTCTCGGTGAAATAAAAAACGGATGTGAAGCGAAATGGCGAGCAAGGGCCACGAAAATGTTTGAAGAATCCGGT…
GSR_IOB_NIMR_777	scaffold07401-scaffold00105	KB664453	AGAP010258;AGAP010265;	GGTATTGCCACTCTCGGAAAATCATGTAGAATGAACTGGAACGATGCAACTATTAACTAATTCAACTGCAGCCAGAAGCTTGAACAATGACACAAATGGCTCAAGAGGAAATTGTCTCGAACACCAAAACGGTCATGCAGGGCTTGGAAGCTCTTCGTGTAGAACATGTAACTCTGATGAATAACCTGTCGGAGGGCAGCAAAACCGATCCGGATAAGATGGAAATAGTGAAGAAGAATATGGAGAACATTGAGCTCGGACTGAGCGAAGCACAGGTTATCGTAATGCTGTTTGCACATCTTCAAAACATCGAAGCCGAAAAGCAAAAACTACGCACACAGGTGAAACGATTGTGTCAGGAAAATGTGTGGTTGCGTGACGAGCTGGCTATCACGCAGC…
GSR_IOB_NIMR_778	scaffold00010-scaffold00405	KB664441		GTTTTATTTTGTATTGGTTGGTGGGGACTTGCTTACCTTCTTCTCCATTTTTTTTCTTGTTGTTGTTTGGTTGCTTAATAAAAGTAGAATATGTTTTAAAGTGTGCATGCGCTCCCGTAAATGTATCTCCATGTATCGAATTGTTTCCTTGTTTTTGGTTTTAGTTTTTTTGGATTCTTTTCTTTCCTCCTTTCTTCCATCCCTTTCTTTTACTTGTGTTCCATGGGTCCATGGTACCGTTTTTGGTTTACCACCGAGAGCGGTATTCTGGTTTTTTTCTTTCTGCTTTTACTAGCTAGCAATAATTGGTAATAATCATCATAATTCACAATTGTTAATTGTATTTGTTCATTTTGTTATTTTTTGTTTTTGTTTCTGTTTCATTCAGTATATCTGTTG…
GSR_IOB_NIMR_779	scaffold00245-scaffold01903-scaffold00002	KB664623		CCCTCGAAACAGGTTTTCCTTTATTCTTTAACTATTGGCTCACTGTTTTACATTGCCATCTCCCTATCCCAGGGCTTTGCGATCTGCGGTATCCTACTAACGCTTCGGCACTTTTCACGCTGTTCCCCTTCTAGCGACCTACGGGTGAAAATAGAAGAAGATTCCCTTTTGTATGCTTATTACACGTTGTGAACATTTATCTATCAAGCGCTTGGTAAGATGATATTTAACGCTTCCGTTTGGATCGTTCGTCATCGTTCGGGAGCGCAATAGGAAAAGCTGCAACCCAGCCAACCAGTGAAAGTACGAACAAGACGCAGAACAAATGTGGTGAATGTTGGCTGACCAAGCCAGGACCAGCACCGTTGATTAATAAATGTTAAACGGAACACGCGTAGA…
GSR_IOB_NIMR_780	scaffold00044-scaffold07682-scaffold22959	KB664506	AGAP011242;AGAP011242;AGAP000082;	ATGGCGATCGCTGGACTGCCCGATCCGTTTGCCAAAATCCTTGTGGAAGGTACGACGCAGGAGTACACGACAGAAATCTGCAAAGCGTCGCTGGATCCGCGCTGGAACTCGCACTACGATCTGTTCCTCGGCAAGAACGATAACATCATCATTTCGATCTACAACCATCGGAAGCTGCACAAGCGGCAAGCCTTTCTCGGCTGCGTGCGGATAGTGGCCGCCAGCATTCAGCATCTGCGTGATACTGGATATCAACGGTTGGAGCTGGTGAAACGTTCGCAGGATGATCCGGATCCAGTCAAGGGACAGATCATTGTGTCGCTAATGTCGCGGGACATTGCAACCGGTGGAACGCCGCTCGCAATCGTAAGCCCGGCCGGCGATGTGCGCGTACCGGAC…
GSR_IOB_NIMR_781	scaffold16468-scaffold12353-scaffold13295	KB664724		TTTGCTTATGTTCTAATTTACGTAGATGATTTAATCATTATGACTCAAACATGCAGTGAATTTGAGGCGATTTTGAAGCATTTACAAAGCAATTTCAAAATGACTAACTTAGGTGATATACATAATTTTCTCGGAATTGAAGTTGTAAAAGGTAAAAAAGGGTACAAGTTAGGACAATCAGAGTACATCAGGAAACTTGTAAAGAGATTTAACTTGGAAAATGCAAAACCGTCGCGGATACCAATAGAGCTAGGTTATTTAAAGCAGAAGGAGGAGGATTGTGAGCCTTTCTCGGACAATAAGAACTATCTGAGTCTCATTGGCGGTCTGCTTTACATTGCAGTTCATACTAGACCAGATATCGAACCATAAGTACATCCATTTTGGCACAAAAGTCAA…
GSR_IOB_NIMR_782	scaffold00363-scaffold00025-scaffold11699	KB665343		TTAAATAATTGGTAAAAAATTAATTGAATTTGATGAGATTCATGGTTAGTATATCTCGTTGCGAAGGCTTACAATAAATAGGAAAATAAATAAATGAATCCACAAGTTGTTTCCATGCGTTCTTTATTCGTCCATTATTCGTCGGCCTACGCATAATAATTACAATTTTCCAGGTAAAGAAAGCAGCTAATTACTAACTTAAACATTAAGTACTTAAAGCGCTACAGAGTGAACTAATGTCTTATCCCTTATAATACTCCTTTTAATAGTTTCTCATGTGTAAGTATGTGTATGTTTTTTAAGCTAGTTTTTATAAGTTTTGTTTTCCAAATAAGCTAATCACAGAAGAATTTGTAAGTGGTTCGACACCAAATGCGTCTACTTAAAGCACATCGGATG…
GSR_IOB_NIMR_783	scaffold00029-scaffold09675-scaffold15501	KB664467		CACTTACACACCCCGTAACCGTAGCTTAAAATACTTTCCCCCCCATCGCGGTGGACAGTCTTTGCCGAACGTTCGTATTGAAAGGGAGAACCCGGCCAACCACTCTGTAGAAAACAACCTGCGTCATGGCACCGATTGTGCTGTACAGTACTCGCCGTACGCCGGCCGGCAGAGCCGTAGAGCTGACGGCGAAGATGATCGGGCTGGAGCTGGACGTGCAGTACATCGATCTGACCAAAAAGGAGCAGATGACGCCCGAGTTCCTTAAGATGAATCCAATGCACACGGTACCAACCGTCAACGATAATGGTGTCCCGCTGTACGACAGCCACGCCATCATTATCTACCTGGTGTCGAAGTACGCGAAAGATGACGCCCTCTACCCGGCGAAGGATTTGG…
GSR_IOB_NIMR_784	scaffold01915-scaffold06256-scaffold00362-scaffold00016	KB664450	;	GTTTCCGTACGTCCGAATCCTGATCCCAAGTCCAATACACACAAACAAACATTCTTGACCTCGTGCGTACCTCGAAAATCTCCCGTGGTCACAATATACATCCACAACGGAACGCACATTGTGACCACCGTATCTATCGCGCCCACTGCCGAGAAAACCTTGGATTCGGCTCGAAGCAACGTACGCCGTGCATATGTTTGTGCGATCGCGAGCGTTGTTTACGTTTTCCATCCCCGTGCCGAAGAAGATGACGCATCCCGCATTCCCGCATACTTTCTCTCACCACGTACGTGTGTGTGTGTGTGTATGTTGATCCTCCATACATGCAATGTTGGTATGATGCGGGAGGCGGGGGGGGGGGTTTATTATTTATCTGTGAACCATACCAAACCATCCCCA…
GSR_IOB_NIMR_785	scaffold02822-scaffold00018	KB665066		TGGAGACGTGAGCGTAGGGTTATAAACGGGTTGAAGCTTGACAGCTTCTGGGGACGCCAAGAAAACCGCGCACTCTTCGTTGCAGGCTCGGGCACAAAAGACGTGTACAATTAGAAAAGGAATAAAATATATATTGTATCACAAGATACAACAGTGGCGACGAGTTATATAAAATGACTACACCGGTAGAACCGAACGCGGCATGGATCGTCGAGATGTTCAAGCAGCAGCAGCAAATGTTAAATCAGCAACAGCAGCTGTTGAACAGCGTGATGTCGGTGATGAAGGCAAAGGACAGCGAATGTCCTGAAAAAGCGATAGACGCCATCGCCGGACAGATCAAGGAATTTCATCATACAGAGGAAACAAACTTCGAAGGCTGGTTTGTTCGATATGAAG…
GSR_IOB_NIMR_786	scaffold00090-scaffold06915	KB664810	AGAP008712;AGAP008742;	ATGGACGGTCACAGTCCGCCGGGTTCGGTGCTCGGGCTAACCCCACACAGCAAGGTATGGGTCGGTGCCTGGTGGGTTGGGTTCGTGTTCATGGCAGCGTTCTGCTTGCTGTTGGCCATCCCCATCCTTGCCTATCCGCCCGCCCTGCCCGGCTCGGAAAAGCTGCAGAAGGTGTCGGAAGCTCACCGGGGCGGCGATGCGGACGGCGAGCGGAACCAGGAAGCGTTCACCAAGATCAAGCAGATACCGCGTGCGCTGCTCGCGTTGCTACGCAATCCGACCTTTTTCTTCCTTAATCTGGCCGGCGCTTCCGAGGGCCTGGTCATCTCCGGCTTTGCCGTGTTTCTGCCGAAGCTGATCGAGAACCAGTTCAGCGTGACGGCGGTTTGGTCCGCGCTG…
GSR_IOB_NIMR_787	scaffold03504-scaffold00081-scaffold20646	KB665154	;	TCAGAGTGTTCATTAGCAGCAATCCTCTGCATGGAGCTGCATATTGGCCAGGCTGCTAAACTCTGCTCCGCAAATGGGACAGGAGTACGATCGACTGCCGCCTCCTTGCGCTTGGACCGTAGTCGTTGTCGAGGGATTCGACTCCAAGATCTGTATTGCACGCTTTAGCTCCAATATTTTTGCATTGGAAGCTGCCAACAGTGTGTTAAGCCTGCCGTTCTCGCTTTCGGCCTCTCGCAATTTTTGCTGCAGTTCCACGTTCTGGGTGGTCGATTCACTGAGCTGGGCTTCTGCGGTTTGCGAGGCAGCTTGAATCTGAAGAATGCGCTCCTGTAGTTCGGTTTTCTCCTTTCTGGTCTGCTGCAAGCACAGTTCGAGTTTCTTCATCTCACTGCTAAG…
GSR_IOB_NIMR_788	scaffold00654-scaffold00118	KB664502		tagcgatacacaagaccaacttttcagctttcctgggtgatctttacattaactaagcggaaatgaacgtgtctgaacgtgcttgcaatttgctttttcaatatgtgatttttgaactggtatctatcgtccatttttactttgaaatattacgtaaaatacgtataaactagtttaaatattgctttctgttgattttagtcatttaaacctatctgtgaggtttaaatttctaacattcacaactccttggatatcggcacgtgatttccatggtaacgccatgcgattccaccaaagtgtcgcgcattcgatggtgatggcacgtaaatcgcagcaaacacctcgtgagtcgaagcaGCTAGAAACAGGTGCAACATACATATCTCTATATACTGT…
GSR_IOB_NIMR_789	scaffold01203-scaffold00119	KB664523	AGAP003735;AGAP013187;	ATTAAGAAAATGTAACATCTAAGAAACAACTAGCACTAGAGGGTAGAGCCAATGTGAAATGTTTCGGAAAATAGGCAGTGGAAATTGACAGATCGAGAAAGAGGAAAAAAAGAACAGGGCGAACGCTTTCTTTCTTTAACGAGACTACATCCAGAGTACAAGTGTGACAGAGCACAAAAAGCGATAGTATATTAACAAGTAACGAGATCAATTCAAACATAAATAGTAAACAAAAACACAAACAAAACGTAACACAAAACTAGGTAAGAAAAGTACTAGCAAAAATTAAAAAATTAAACATAAACTTAAACACAATAAAACTACAAAATTTCCAACAGCTTTCGTTCCTTTTCAGCAACTTGCAGTTTACCGCACGCTCTGTTGACCCTATCAGCTTTA…
GSR_IOB_NIMR_790	scaffold00489-scaffold00031	KB664954	AGAP001566;	AATGAGTGTATCCTCATCCTGCGTTTCGAACAACATCAGCAGCGAGTGCTGGGAGGATGACCGTCCGCCCATTCCAGCGTTCCCCGACAGGGAACCGTCCGGTGAGAACAGTCCCGTCTGCAGACTGTAATTATCCCGATACCCGGACGTGGAAGACGTTTGCGACACCGAATCCCAGCTAAGATCACCGAGCGTGGCGATCGTCCGATTGAGCGGTTCCACGTACGGTGGTTCGTTCACGATCGGTGGCATTACCGGCGGTCCGCCTGGGCCGGGAATGACCGAGCCGACCATAGCCGGTGGTACCGCACTGCCCACCCCGGCTCCCGCTCCGGGGTTAACCGGTGCGGGGCCAACGCCCATCGACAGACCGGCTCCACCGGCAACGGTCGGTATGTA…
GSR_IOB_NIMR_791	scaffold10848-scaffold00111	KB664422	AGAP005356;	CTTAGGATAACCCCCAGCACAGCAAACGAGTTCCGGGGAAGAAAGTAAGAAAAAAGTCAACCGGTCGAATTAAGTGAAATATGCGTAGCGAAAGAAGCAAGTTGATTAGCGTTGGTTGGTTGTGTGTTAGGTGTAACGAATCGTCTGCCTTTCTGCCCTGCGAATGCGTTTGTATCTGAATAATTTGCCGGTCCGCTGGTCTTATCTTTTGAGCGCAACTGGCTGCTGTGTGCATCCTACAACCATTATGGGGTTAGTTCAGCCGCCCGGCGTGACACAGGAAGGCACTGTGCGACGGGAACCTTAATAGAACCGCGGGACCTCTCTCGTGGTGAAACTGCTACGGAAACAGAAAGAAACAGAGAAATGATATTTGGAAATTCCCTGGAAGGTATACTT…
GSR_IOB_NIMR_792	scaffold07784-scaffold01579-scaffold00043	KB664778	AGAP010714;	CATTCACCGACCATTCGTCGAATCAAAGCCAGCTAATTTCCGCAGAAACTATTCCACAATTTTCTCGTGCACGATCCAGTCAAACTGCTGAATTACAGAATTGCATTTGCAAAACGGTTTATACGGAAGCGTTCTAGAGTGAACCGTAAAGTGTTCGGTCTCGAACGATTCGTTTAGAATTGAGAGCAAATTGGAATCATGCAACCCGTTACCGCTGGCGTTATGGCGTGTGCCGTTTCGTGTGTTCGATTAGTGACTGTATGTGGTTCCGTACTCACTTGGAGGGTGGCCATAACATGACAGAAGGCTGCTGCGTTTTATTTTAAATCAACGAACATTGCGACTGCAACGAAAGGAAAGGTAGTGCAATGGTTTTGTGGGTGAAAAGCAGTGAAGAAT…
GSR_IOB_NIMR_793	scaffold00062-scaffold01505-scaffold17844-scaffold14833-scaffold00067	KB664444	;AGAP004723;	GGGAAGAATAGTTAGGAGAGatttttttatttttttttttttaGAAGGACTTGGCCATATTGGCTGTTGGATGCCCAACAACTGGTACGAGGAAGCCACAAATCGGCGCAATGTACTAGATTTTGTGGCAATGTTTGGGCTTCCTTTTTCTGTCGCTGCCCGCTCCGTCGTGATCGAAAGGATTCCTAGTGTTTGTTTGGCCGATGTACTATTATATGATACATACTCAGAAGAGAAGTTTCATAGTTCAGAAGTTTATAATAGCATTCAAATGGAAACCTAATTCCTTCACTACTTCTAAGTACCAAAACTCGTGACCATATGTGTGAGTCAGCTGCAATGCTAACGATATCTACAACTCATGACCTTAAACTGGTAATGTTGGCATGCACAGAATTA…
GSR_IOB_NIMR_794	scaffold01927-scaffold00003	KB665376	AGAP003790;AGAP003790;	CACCTTTGAGTGGTGAGAAGCATTAAAGAGGAACCGAGCCGAGCGTCCGCTTATGTGAGACCCATCGGTGAAACCCAAGTTCAGTTGCACTGAGTCCGTCGTTGCGTTCGCTATCGGCTGCTACCCATTTTTGAAAAGCCCTACCTCCGTCGAGTGTGTACAGTTGATTCTAGGTACAAACAAACCACACCGAAACCATCAACAAAATGAGCTCGCAGTATTATCCATTCCAATGCACACCGACCGTCTACCCGGCCGATCCGTTCGATGCCAACGAAGATGCGGCCACGCTCCGTACCGCGATGAAGGGTTTCGGTACGGACGAGAAGGCCATCATCGAGGTGCTGGCACGGCGCGGTATCGTACAGCGACTGGAGATCGCCCAAGCGTTCAAGACCT…
GSR_IOB_NIMR_795	scaffold00020-scaffold01271-scaffold01456	KB664522	AGAP002670;	TTTCTCTGCTGTCGTTCGTCGCAGTGATTTTTACAGTTTCTCACCATTGCTGGGAGTGTTTGCAAATACACAGTTCTAGTGAGTTTTGGCAAATATACGGTGTGTTACTTCGCCGGGAAAAATTAATGTCCGCCACCACTCAACCGGGTGTTGCGCACGGGGAAATTGCATATTGTACAGTTACTGTCGATCGAAGAAGCGAATTAGAAGTGCGAAGAGGCGAAAGATTGTCGATAAGACGGAGATTTAAAACGTGAAAAGCAGTCATACGGCTTGGAAATTGAAGTGTCGGCTGAAGTGGAAGAATTTACGGTCAGCTCGTGCCAAAAAGAAGAAGCAAAAGGAAGGTTCACCGTTCTGCCGAAGCCTTGTGTGGTAGCGTATTGCTAAAATTGGTGC…
GSR_IOB_NIMR_796	scaffold00071-scaffold01730	KB664416	AGAP011694;AGAP011694;	GCGCCGAAAAAAGCAAAAGGGCAGCGCTCCCGTCAAAATAAACATAAATGTGTCGCGTGGCCgagagagagagcgaaagagagagagcgagagagCAAGAGCAACAAGAAAGAGGTCCTCCAAAGGCTGTGTTTTCGCGTTTAGTACGCTGCAGTGAAGGTGGTGGTGGTATGTGTTTTGAAGCAGTGGATTGAAGAAGAGATAAACACACAACTTGTCCGTATGTCAGCATCCCAAGTGCTTCCAGTTGCTGTGTGTGAGCTTCCCTAGTGTGTCTGTCCCACCTGCAGGCAAATTGCAGTTTTATTGACGCTCGTCGACAAAGAATCCGGGGCACTGGATGGAGTTCTTTGTTTAGCTGTACCGTGTTTACCGTACCCGCTACTGACTAGCAGCATG…
GSR_IOB_NIMR_797	scaffold03300-scaffold00663-scaffold00024-scaffold03027	KB664433	AGAP006812;	TGGCCTGCCATTTCCTTCCCGAGCACAGCAGGACGATCCTGACACTTACGACACCGATCTCGGGATCACGCCCAGTAAAAGATCGCACGCCCCAttttgattatcttttttttttcttcttttatttgtcgttacttttgttttgtgttcttttgttgtttgttttgtcttAACAAATTATTGATTTGTTTCGCTCCGGACACACACGCGGCTGGTTGCGTCCAATTTTTGTCAACCGTTTCCCTACCGGAAAACCCGTCTCCTCAGCACACATTCTCACACGCTCACTCACACTTTTTTGTTGTTGCTGCTGCTGTTTCCTTTCACTACCTTTATCCGGCTTTTTTTCCTTTCAATGCTTTTGTTTTGCTTTAGTAATCGATATTAATATATATACTC…
GSR_IOB_NIMR_798	scaffold01271-scaffold01456-scaffold00020	KB664522		CGTCGTTTCTCTGCTGTCGTTCGTCGCAGTGATTTTTACAGTTTCTCACCATTGCTGGGAGTGTTTGCAAATACACAGTTCTAACCAGAAACAACAAAATGTGGGGATTTTTGTGAACGCCCCAGTTATGCCACGAGTTAACAAAACGAATCAACAAAAGCAACATCCCATTAGCCATTCACATCCGCCAGAGCAAAAGCGTCCGCAGGAACAGCAACAACAGCGCGGCCCCATCAGCATTGTCCGTTCGCGCTCGCGTATGACGAATGGTTCGCTTGCGGGTAGATCCGTTACGGATCGATTCCGATTGACATCGTTGGTGGTTCTGGTGATGGTCTATCCGAACGTGATACCGATCGCGCCCGCATCGATGGGGggcggtgggggtggtggcggcgg…
GSR_IOB_NIMR_799	scaffold00187-scaffold00092-scaffold05144-scaffold16582-scaffold01930	KB665210	AGAP006366;AGAP006366;AGAP006366;AGAP006366;AGAP006366;	TAGGTATAGTAGTACATTGTGTTTGCCCCTATCTATCTGGTTGGTTGTGTATGTCTCTCTGTCTGTTGTCTCGCCGTGGCCGCTAAATCATCGCGCACTCGGTCGCCCCCCAGTCGCTCGCGAGCTGTCGTTGCGCGAACATTCGAAAAGTCCGCGACAGAGCCAGATCCGTTCTTCGTTCGGTGCTGAGCTTGGCCGAGAAAGAATCTGATCCAAATCGTCGTCCACCGACGCACCGTTTGTTCGGTACGGGTCACACGGAATCTTCCGTCGTTTAAACATTTGGACTAGTGCCTCTCTACAATCTCTCCCCCCAAGAGGTTAGGACAAAACAACGGTCAAAATGCATCGCGCAAGAACAGCACTCCACATGGTGAACCCGATGGGTCAGCAGAACTT…
GSR_IOB_NIMR_800	scaffold00103-scaffold03938	KB664367		ATGCAACCAAACCGACCGACCGCACCGAAAAACGCCGAGAGTTTAGAACAATTTAAGCTTAATAGGCAGCAAGCCCTCTCTAGCATCGGCTGCTGCTCACTTCACCCATTCGAGGTGAGCCAACAGGCCAAAAAGAAAACAACATCCCCACAGCAAGAGAGGCGTACGCCGGCAATCGTTTTTCCGTCGGTCGGTTTGAATGGGTTGCGAAGCATCTTCGTCGATCCCGGGCGGGTCGGTCCCGGTGGGGTGGTGGCTGGCCTCGGGATCGAATTCCGATACGCATTCAAAACGTGCACGCAACCACGGGAATGCGCGAGCCAGTTATCTAATCATGCGACCTCCATCTGCAGCGATATTGCATGCATGTATGAGCACGATAATAGCAGTAATGGCACG…
GSR_IOB_NIMR_801	scaffold12963-scaffold02814	KB664832	;	TGAAAGGATCCTATTAAGCTCCTATCAAGGCATATTTGATCGAAAAGCAATCAAACGAGCTCAAGCTTATGGGACTTGTGGGACATCGTATAGAATTCGGAGTACCAACTGCACAATATCTCCCTAATTCCTACCAGTGCATTCGCTGCTCTAAATCTCCCGGTAACACTGAAACGTTCGCGATTTGGGGGATGGCTGTTCTGCGTTTGCTTTAATGCATGGGTTTTGGCTACCTTTTTTGTTTTAGAATTATTAAGAGGTGATAGATGCCGGCTGACAGCAGTGCTGCCCTCCAATTGCTTTTAGTTCGCACCAACACGAAAACCTGGCGGTGCAACAGTGGTGTATTTCTATTTGTTTTCGCTAACATACCGATTGGAAAAGATTTCCATACTAACT…
GSR_IOB_NIMR_802	scaffold00008-scaffold00517-scaffold04123	KB664400		CCGGGATTCTACTGTGTGTGCTGGGGTGTTGATGATGAGACACGGAACTAATGCTGTCACTCGCTGCGTCTCCCTGTGCTATCAATCCGCGCGCGCACTTCCCAATGCGTAGTCCGTGAGCGCACATCCCATTTTGTAGGTGTGAGTGCCACCATTGCTTGGCTTTATCTCGTCTCGTTGCCGTGCAGTATAAAACCGATCCCGGGAGACACGCGAGCTTCCACTAGTAATGCGACCGGCATCAGAAGCGGAGGCAAACAATTCTCTCGCGAGAGTATAAAAGTCAAGGACTGGGCTGGATTGTGGTTTTGTAGTGTTTTCAGTCGTGTAAACAAGATCATTGCCAGGTGCACTAGTGGAGTTGAATTAGTGGTTGATTAAAGAGTTCAAGTGAGCCTG…
GSR_IOB_NIMR_803	scaffold01825-scaffold00059	KB664444		ACAACATCCTGACATAGCCAACCCAACACAAAAACAAGTTTCATCAGTGAATTTAGAACGGACATCCGACATGTTCCAGGTGAAAATAATGAAGTAGTCGACATGTTAAGCCGTATCAATGCAGTCACCAAAGATTCAATTTTTTTTGAAAAAATGGCTCAACTACAAGGAGTAGTCGACGAGATTAACAGTTTTATCAACTGTCCACCAAAAGATACGACAATCATCGTAAAGGAGTTTACTTTACCATCAAGAACAATCTTATTCTGTGATGTATATACACCAACTATACGACCACTGGTACCATCAGAAATGTGTAAACAAATAATCACCAAGCTTCACAACATATCACACCCTGGAGTACGAGCAACAACCCATCAAGTAACGCAAAGATACGTT…
GSR_IOB_NIMR_804	scaffold00189-scaffold00204	KB664647	;	TGACGGTTAAGAGTGGACCGCCTGTGGCCATTGTCATCGAATGGCGGTGATTTATACTGTTCCAATGCGGTATCTTTACGCGGCTCGAAGGTAAACGGAAAGGCTGTGGACACATTTTTGACGTCCGTCCGGGGATGGTTTTTGATTTCCAGACCCACTGCCCCGACCAGCCCGACGATACAAATAAAATATAGCTGAAGGAAATGTGGTAATTTGCGGGACACATTCATTGTACGAACGAGAAAGGTGGTTTAAGCAGAGGAGGGTGTTCAGATTTGTTGTCGAAACGCTCATGCAGGATGTATCGCTGAGTTAACAACGAGGTGATCTATCGCAGGAATGTAGAGGAATACATCATCATCAGCTGTAAAAGCTCATCATAATCCACACACACACACA…
GSR_IOB_NIMR_805	scaffold00037-scaffold00238-scaffold00043	KB664571	;	ATTCCTGCGCTCCAAGCTTGGTTTGCGACCACTATAGCGAGTTAAACTATAGCATATTGCGGCTTTAGCATAAAAGAGACGTGACGATATAACCCGGCGCGAACGCCGGACGATTTGCAAGTCGCACAATTAAAACACTTATGCTTAAGTTAGGATACGTAAACACAAGCTGGAAAGGAAATAGTTAAACAAGAAAGAATGATCTTTCGTTTCGATCTAAGGTACCTCAAAATTTATGTATAAGAAATCAACTTATTCAATAAAGAGGACACAATTCTTAACCGGCGAACCGAATACTTCGTAAGAGTTTCAGGGTTCTTTTCAGGCACGAGATCCGAAATAATCCTTCCCTCCGGAGAACGGATTCGACCCCTCAGCGGTGTCTACCACTCCAACGGA…
GSR_IOB_NIMR_806	scaffold21354-scaffold01962-scaffold14478	KB664546		TTCACACACACCACCGTGACGCCGACTTCGCGATCGTTTCTCGTGTGCGCGGACGTGCGCAACTGCTCGGCCGGGTTTCATTTCCAAGTTGGCAGCTTCCCGTGACGGGCCGCCGTTTCGACGCGCTTCACTNNNNNNNNNNCAACTCGTTTTGGGCACGTGCAAAAGATGGGTGGGGGTTGTTGCTGGATCGGGTGTTTAAGAACGTGAGTGGAAAGAATTGTGTGCGTGTGTGTGTGTGTGTTGATCGTATCGTGTGGCAGGCTGCTTGCTGCGCAAAACAATAGTGAGAGCAATAGTAATCGATGGCCATGGATGGCTCCTATAGTGATTTTGTGCTAATTGGGATGGTGTGAAGTGAGCTGAAAATTTCCCATGCAAAGAATGTTTTCAGGGGTG…
GSR_IOB_NIMR_807	scaffold00004-scaffold00761-scaffold10459-scaffold12911-scaffold17155	KB665310	AGAP000029;AGAP000029;AGAP000029;AGAP000029;	CTTTTTGTTTGACGCATTGAGGTTTTGTACATCATTACCTTAGAAAGTAGAGTTGCTTTGTTTAATGCCTGATCAATGCACCGCTTTTGGTATGTATCCCCGCGTTCAGCCCTGCAGCGGCACTTCCTTCCTTCCTACGGTACGCGAGAAGCCGCCCAAAAATTGTCCCGGTTGTATTTATTGCAATAGAAACAAAAAAACATGGAGGACGCCGAATCGGTTACACCGATACCACCACCCCACCATACACCACACAAAAGCGCACATATGTGTGTGTGTGTGTGCTTCTCGTTCACATGTGTATGCACTGCTGCACTTGCTCCCGATAATGGATTAAAATCAATCATGACGTTCCGGTACGGCTCGACTAGCCTCACGCGTCCCCACTACCAGGGATTG…
GSR_IOB_NIMR_808	scaffold07674-scaffold07033-scaffold00032	KB664855	AGAP011167;AGAP011167;	CTACTCAGGGAAGATTTTATTCATCGGTACCTTGAGAAAGATTTGATTGGAAATCTTTTTGAAGATGTAGCCGAACGTGTCCTCGTACGAACTGCGCAGCTCCCGGAACACAACCTCCCAGTTGTCGTTCAGCACTTGGTGCATGGTTTTGCCTAGCCGTTCATCTCCGTTAAAGAGATTGCCAAACTGGAACGTTACCAGCTTCGGTTCGAAGTGGACAAGATACTTCCGGATGTGCATGTACTGTTCGCCGTTACGCTCGACCAGCTCTCCAATCAGTTCGTGATGAGTCTTCAACCGATGCAGCGTAATGTTGGCTACCCCTTTGCCCGTTATCGGCAACACCAATATCCGCCCATCCATGGTGTAGTTGCCCACAAACTGAATCTGTGGTGTGAT…
GSR_IOB_NIMR_809	scaffold00286-scaffold00014	KB665088	;AGAP003434;	CAGAACGACAAAACGGTTTACGCGTCTGCCTACTGTATTGGAAGTTCGGTGAACCAGCCAGTTTCGATTGGGTGCAGAAAAATCTAGAGACGGTATCCCGTCTTTACTGCTTACCCTCCGCATTTAGTGGCCAGCCAGGCGAGAGAACGGCGTACAAGCCTATTAATTGAATTAGTTGGGCGAGTGAAGGCACAGCGCGACAGAACCTACCGCAAATAGTATCCTCGCGGAACATTTAATTATGTGAACCAAGTTTTTTTCTGTCCCTTTCTTGCTTTGCCTCTTTCGTTCCGTGCCGGACTACTTTAGTGTGACAGTTGAAAAGCATCGCTGAGGGTGTGTGTGTGCGTGTGTGTTGGGTTGTGTTATTTTTCATCTGCCTGGTGCAGCACATACATT…
GSR_IOB_NIMR_810	scaffold00022-scaffold12789	KB664629	;AGAP010690;	GGCAGGCGCACGTCGGTGATGGGAAAATTTGATTTGCAGCGAGAAGTTGCGAGCTGCTAGGATACGAAAGATATGGCAGAAAATTGTCACTGACTAAACAAATTAAAATCACTCGGTCGCTCTCTTGCACTGCATTTGGAGGGTTTTGGAGGAAAACTTTTCCCCGCCCGAACGATTCATGTGAGTTAATTGTGTGTCCATTGTCGTTTGACATAAGGTTGCAGTATGCTATTCTAACCACAAATAACTGCCCAAGTCCAACCCTGCTGATTCCTGGCAAACATGATGAAAACCTCAATTTGCATCTTAATACTGCAATTGCACCGCATGTCCACTCCGCTTGTGTTTTTTGTCCCAGCCCACCAACAAAATGGGGTGACTGTGAGCGGTGGTGGCATT…
GSR_IOB_NIMR_811	scaffold00111-scaffold10848	KB664422	AGAP005352;AGAP005352;	ATCTAGAGCTCGCAAAAATCCGAGCAGGGTAGAGAAGGGCAGTGCTAAAGAACCAAGAAACAAGACCACGGGCCGAACAAATTCCCATTTGCTTGTGGCTGCAGCCGTCAATTCGCCAGTGGTACGAGAAAGCAGGGCTGTATTCGCTGTAGGGCCCACCGTACCCCTGAGGCCGTCGCTCATTTAACTTCCCTGCACGAAACACGTACCCGAGTGCGTGCGTGTGTGTTTGCAGAGAGCGGCATCATCATCATAGTTGCAGGCGGCTCGCGGAAACATCCCATTTCCCAATTTCCATCGCCGATTCCATCCCGTGACGCGATCCGTACGTGCGTTTTTTACGCATCGGTTCACGGGATAGACGGGGCTTGGTAGGTGCGGTGTGCGGTGCAGGAGTGT…
GSR_IOB_NIMR_812	scaffold00055-scaffold00161-scaffold22428	KB664551	AGAP001944;AGAP001944;AGAP001944;	NNttttttttgttttgtttgttttgctttgtttGATGAGAAGGCTGAGTGTAAGGGTGTAGGTCTAAAGGTTCTGCGCACATCATCATCCACTCAGCAAGCTCCGGAGTAAAGATTTCAAATTAGTCGCTCAGATCATCGCTCTGATGGTTGTTGTTGCTGCTGTTGTTGGCGGCACCGTTGTTGTTTGTCTTGTTCAGGTTGCCAcctcctcctcctcctcctgctcctcctccACTAccaccaccgcctgcgccgccaccaccactgctgctgctgccagcgccaccgccTTCTGCAATGGCGGCTCCACCGGCAGCGGCCAATCCCATCACGCCACCGTATCCTGGTATGCCACCGATGGAACCACTACCGCTACTGCTTCCACTGTTATTGTGAT…
GSR_IOB_NIMR_813	scaffold00055-scaffold00161-scaffold22428	KB664551	AGAP001944;AGAP001944;AGAP001944;	NNttttttttgttttgtttgttttgctttgtttGATGAGAAGGCTGAGTGTAAGGGTGTAGGTCTAAAGGTTCTGCGCACATCATCATCCACTCAGCAAGCTCCGGAGTAAAGATTTCAAATTAGTCGCTCAGATCATCGCTCTGATGGTTGTTGTTGCTGCTGTTGTTGGCGGCACCGTTGTTGTTTGTCTTGTTCAGGTTGCCAcctcctcctcctcctcctgctcctcctccACTAccaccaccgcctgcgccgccaccaccactgctgctgctgccagcgccaccgccTTCTGCAATGGCGGCTCCACCGGCAGCGGCCAATCCCATCACGCCACCGTATCCTGGTATGCCACCGATGGAACCACTACCGCTACTGCTTCCACTGTTATTGTGAT…
GSR_IOB_NIMR_814	scaffold01203-scaffold00119	KB664523	AGAP003735;AGAP003735;	ATTAAGAAAATGTAACATCTAAGAAACAACTAGCACTAGAGGGTAGAGCCAATGTGAAATGTTTCGGAAAATAGGCAGTGGAAATTGACAGATCGAGAAAGAGGAAAAAAAGAACAGGGCGAACGCTTTCTTTCTTTAACGAGACTACATCCAGAGTACAAGTGTGACAGAGCACAAAAAGCGATAGTATATTAACAAGTAACGAGATCAATTCAAACATAAATAGTAAACAAAAACACAAACAAAACGTAACACAAAACTAGGTAAGAAAAGTACTAGCAAAAATTAAAAAATTAAACATAAACTTAAACACAATAAAACTACAAAATTTCCAACAGCTTTCGTTCCTTTTCAGCAACTTGCAGTTTACCGCACGCTCTGTTGACCCTATCAGCTTTA…
GSR_IOB_NIMR_815	scaffold09713-scaffold02972-scaffold08448	KB665010	AGAP006027;	TTCGCCATCTCGTGCCTTTCCTTTTCCATGAGCAACAGATTTTCTAGTAACACAGCATCAGAAGCGCGTTTTGGCCTGCTGCCTGATGGTTGGCTACTTGATGTATGCTTTTCTGCGTCTGCTGCCTTTCCATAATCCTGCGGCTGGTTATATTGGTTCTCCTCCGTCATGAGTTCTTCCTCGAGGTACTCTTCGGTTTCATGTGCGGATCCTGCTAATTCCAGATTACCCATTCTGGGTCTGGATGCAAGCGTATCTTTCAAGAAACTCATCTGCTTGAAAAATTTCCATCGGATATGCTTGTATCCTGACCCAGATGGCTGCTGCGTTTCAGAAAACTTGCGTGCAAAGATGTCACGCAAAATACGCCATTTGTGTTTTGCAATTTCTCCTGAAACA…
GSR_IOB_NIMR_816	scaffold00004-scaffold13395	KB664448		CCGGTGTGTTCGGTGGTAGCTTCGGTGGTGCCTCTAGCCGCTCGTCCGCTGGTGCCGGTGCCGAGTACGATGCCGGATACCAGGCAGGACTTCGTGCCGGTGCAGCTGCGTCCGCTGGCAGCAGTCCGCTATGCGGCACCGGTGATTCAGAAGAACTTCTACTACCATGTCGCACCCGAGGAGCCCAAGTCGGCCGCCGAAGCCAACACGCTCACCATCACGCCCCGCAAGCACTACAAGGTCATCTTCATCAAGGCTCCGACTGTCAGCGCTAATGCCGGTGCGTCGGCCCAGGCTGCGAGCAGAACCGAGGAGAAGACGCTGGTCTACGTGCTGGTTAACAAGCCGGCTCAGGCTAAGGCTGGTTCGGTTGCCGACGCTAGCTCGTACGTGTCCGGC…
GSR_IOB_NIMR_817	scaffold00515-scaffold00021-scaffold01754-scaffold03206	KB665287	AGAP011357;AGAP011357;AGAP011357;AGAP011357;	ACCCGACCGACTCAATTCGATCGTAGCCGTCGAACGAGCAGGACGGTTAAGCGCGTGCGTACGGGAGTGTGCGAGAGTGTGTTGTGTTTGCGCATCGTATTAAGACGTTTTGTTGTTGGTCGTCGTCCGACACACCCGAGTGGCCTGCATCTTTGCAAGCGTGTGCGCGTGGGTGCATCGTGTAACGGTGAACCGTCAGTGGAAAAGTTCAGGTGCTATCCAGCGAGCGGGACCGCCTAAAGGGTTCGTCTGTGTATAAGTAACGGGTTCAAGTTACATCGGGCGCCAGTCCTCCAGGTCAAAAGGAAAAAAGTAGATCAAAGCGTCCCAACCATGTCACCATTCGGGTTCAACGATCCGCTGACGGCGATAGCATCCGCAGTCACGGGTGTAGCGATC…
GSR_IOB_NIMR_818	scaffold00004-scaffold07813-scaffold03136	KB664448		CAGAACGGAACCATAGCCGCTTCTCTTCCTACCAGAAGCGACACAAAATCTCCGTATCCTCCCACATGATGGAACCCTTTGCCGCAGCTTCACCGTAAATGCGCGTGTGTGTGTGTGTAGATCAGCGCTGCAACGGATCGGGCAGTAGAAGGAAGGGGCGTAGGAAAAGCGACGAATAACGCGAACACGGCTTGTCCGCGTATGCACGTATATATACGTGTGCGATATATATAGACACACATATACGACAAGCGTATCTTCTTCAGTCACCATCTTGGAATCAGGCAGCCCCAGTGTGTTGTAGGAGCGCGCTGCCCGAGCCCGACCGGAACACACCAGCTTCGCCAGTTCCAATTCTCCCCAAACCCTCCCCCCCCTTCCCCCCCATTCTTCCTGCGG…
GSR_IOB_NIMR_819	scaffold00111-scaffold10848	KB664422	AGAP005352;	TTCCAGCCAACCATCGCCAAAAAGGATATTCGCGAGCGAAGCGACATTCAGGCACGGGCGAAAAAGTTTTCCACCGACGAATCGAAAAAGTTGGACAATCGGCGACTGAATCGATACCGGGACGTGCTACCGTACGATCATTCCCGGGTAGCCCTGAAGCGTGGCGAAGGTGACTACATTAACGCGAACCTGGTGAAGATGGAACGGGCCGGGCGGAAGTACATTCTCTGCCAGGGACCGCTGCCCCTAACGGTGGGCCACTTTTGGGTGATGGTGTGGGAGCACGATTCGCGCGCCATTCTAATGCTGAACAAGCTGATCGAACAAACGACCGTCAAGTGTCACCAGTACTGGCCGGCAAAGATCGGCGAACAGCATCGGCTCGAGCTGACCGATGTG…
GSR_IOB_NIMR_820	scaffold07198-scaffold00039-scaffold10828-scaffold12201	KB664439	AGAP005724;AGAP005724;AGAP005724	CGGTTCACAATTTGTGGTATGTATACGTTTGAAAACTTAAAGCATTAACAACTAATAACATTCACGCTAGCCGTTGAAGGAGGTTGAACAAATTTCAAATAAAAAACCCACATCAGTTCTCATAAGCCTACTTTTAGACAGACCGTCAGAAACAATCAGAATGAATCCACATCCGAAAGCATCGTAAGAAACACAATAAATCTTTCGTTTCAGTTTTTCTTTTTCTTCTTGTGAACGACTCGTTAAAGCTTGAATAAATATGTACTTTACTCGTTGTAAAAATATTAACCTACTTTCGGGACTTACTACAAAGCCGGATAGCTTACACGAATAGAGGTTCCTATATCTTCGGGATGTCTTGCACTAAAATTCGTTGCCACCCTGCGGCATGGGTCGTCG…
GSR_IOB_NIMR_821	scaffold00002-scaffold00606	KB664899	AGAP003725;AGAP003725;	ACTGTTAAACTTAAGTTTTATTATTCTATCAATCATGATGTTTCTTCAGCATGCGATGAAGCGAGATTTACACTAAATGAAGGGCTTTATTATCTCTTCTAGAAAGCGGCTAAACAGCTTAGTACTTCAACGGACCACGTGTCGGAACCATTCAAACTTTTCAGATTTTCAGTTTTAAAATGAATTTTGTTTTCTAAAAGTTTGAATTTTTTACTGAATAATCACAAGCAACGTGCGCCGATTGTAAGTCATAGGTGCAGTTTTTCCTCTTTTTTTTTTTCAAGGGAGAACTCTTATGTAGAAAAAGGCTTGCTTTCTCACTCGTTTTGTAATGTTACTACGCGAATCGGATTTTATGTGTAAAAGCTGATGAAAAATGGACTTTGCCGGATCTATCTC…
GSR_IOB_NIMR_822	scaffold00004-scaffold00418-scaffold14501-scaffold04289	KB664821	AGAP000254;AGAP000254;AGAP000254;AGAP000254;	TATGTTTCTGGCTAGTGTGCGAGAGTGAAGAGAGAGAGAGAGCGGGGGATGAGAGAGAGAAAAAGAAAGCGAGAACGAGAGAACAAGACGAGAAAGAGAGAGGTAGAGAGAGAGAGAGGGAAAGAGCGATGAGGAAAGAAAGATTCATACGCATCCTCCGAGTTCTCAACTCTATCTCTCTCTCTCTCACCCATACTCTCTCTCCCTCTTTCATTATCTCTCTCTCTCACACACACACACGATCAACTCTCCCTAATCACTCCATCTCCTTCCCTCCTTCCCAACCCACTGTTTTTTTTGTTTTGTTTTGCGTTGCCTACGAGCTCCCTAACCCTATGAGTGTGTTTCTTCACTGGCCTATCTGCTGCCTGTTCGCCTATAATCATCTGCGCCTACGAG…
GSR_IOB_NIMR_823	scaffold15183-scaffold00326	KB664465	AGAP008712;	CTTCAAAAATTCCTAGAGCTAGCCCCAGCCGCACGCAGAGTTTTGGACACCTAACGACTTCAATTTCTAAATGTTGTAGCTCTAGCCATCATACACCCCATTAGCAATTAATAGTTGTCCAACTAAATGGGATTCTAACTACCCGGGTGAAATGATAAATGGGCTCATGCAGGAAAACACTTGGCTAGGAAAATTGGAAGGCACAAAACAAAAGCCCCACATTACTAACAATTCCTATCGTAACACCACCCACAGCTTGAGCGAGGGCCCTTCCATACCGGACTGCAGCTCTATCGTGTGTTGCTGATATGCTTCTGTGGAACATGGACACCAAGGAACAGGGCCCAACGTTCCGAAAGTCCCAAAGCCCAATCCCACAAGAGAGGCGGGGGTGGGCGG…
GSR_IOB_NIMR_824	scaffold00098-scaffold08832	KB664777	AGAP008191;AGAP008191;	AATAATAATTTAAATCAGTATAAGCGCAAACAAAATATTGGAACTGTTGAACTATGGAAAAGGAAAGTATGATATGAAGGAAAGAGCAAAGGGACTGCGAGATAACATTAACAAGATCTTCTCTCTCAGTATGCCCCTCATTATCTCTCTTCTCTTCTAGTAAGTGCTCCACGTCCCAGCTGCTGTGACTGCCGTATCGTTGATCTTCGTAACGTTGACAATTTTGTCCGACGGAGCTACTTCCGGCACGGCCGTCATAACGCCACCACCACCACCACCGACCGTTTCCAGCGATTTGCGATTCGAAGACGGTGGCGTTAGGATGCCGGTTTCTTCCTCCGGTTCGATGATGCCGATCGGTGCAGGGGACGCTTCCAGCAGTCCCATGCGTGCATCCGC…
GSR_IOB_NIMR_825	scaffold08681-scaffold00010	KB664477	AGAP007064;AGAP007064;	TGACAGCCAACGCAGCAGGTAGAAAAAAAAGAAAACATTTTGTCTACGTGTTTTGAAAACGTAATCTTATCAACAACAACCGCAATACCAATCGAATAATATCGGACCGTAAACAATTTTCCAGCAAGCTTCTGTTCGCACACCGACAACAACAGCATCATCGAGCAAGAATGGTTGAGCTAAGTTCCAGCACCGATCCGTTCCAGCACGGATTTCCAAACATTGTGTTCATCATCCCGGCAATTGTCGTGGTGGGATTGGGAGTTTTGCGCTTTTCTCACTATCACCAAAAAATGGGAGACGTGGCAGAAGAGCTGTTTAACGCGGTGGGTTCCGACGGTGCGGTACCGGCAGCCGACGGTGCTGTACCGACCGGCGCCGAGAATCCGTTCAATCCGG…
GSR_IOB_NIMR_826	scaffold00003-scaffold06040	KB664562	AGAP003856;	CTTCGATTCAGTTCAATTGTTTGTTTGCGTTGTGCTTTCTGCCTCTGTAATTGCATTTGTTTGTTTGCAAGAAAAAGCTATTTTAAACCATATAGTAACCATCGCCGTGCAAGATCAAAAGTGCCTTATCGATCGGCATTTCATATCAGCTCACATTCATTGCATTCAAATCCTTTCGTTCCCAGTCACACTTGCAACACTTCTGCAGCAAACATGGTTTGGCTAGAATCCTGTTGGTCACCGTGCATTTGGACAAATTCCGTGAAATCGGGAAGCTATGCTGTGGCCGGATACACCGTTGCCATCTCTATCGTGCTGATAACGATGACCACATACAACCTGCTGGGCGGAGATTCATCCCAACTATACTCTCCTCTGTTTGAGACCGACATTCGTGAC…
GSR_IOB_NIMR_827	scaffold02770-scaffold05207	KB664447		GGTTCGGGCACTCGGATTTTTCTTTGCCACGGATTGCGTGACGGCGACGCAATCTGTCACTAACTTGAACCGTTGTCCCAGCAGATAACACCGAAACTTTTTCACTGACTCGACAACAGCCAGCGATTCCAAATCAAAAGAATGGTAATTCTTTTCTGCTTGATTCGTCAGCCGGCTATAATAGTAGCAGGGATGGAACTTCCCATCGTCTTCCGCACGCTGCATTAAAATGCCAGCCAACGCTTCCTTACTTGCGTCAGTGTGAACCTCCGTTTCAAGTCCTGATTTGAAAATCCGTAGCACTGGGTACTGACTCAAAACCGTTTTAATATGAATAAACGCTTGTCGCACTTCATCGTTCACTTCAAATTTCTCCTGCTTCCGTAATAACATTGACAT…
GSR_IOB_NIMR_828	scaffold02955-scaffold13024	KB664525	AGAP005772;AGAP005758;	TTTATCGCACACACAGTAAGTTCACGCTACTGATACtaatatttatatatttcattataatttaCATACAAATGGCTTTGGATTGTTGTATTACACCCCTTTGCTGTTACTACATCCACTAGCTGTAAATCTGAGCAAGTAAACAAGCAAAAACTTCCACATTTCCTCATGACACTCTCGCGGTTTACACCTCCATACACTTTTATACCCGAACTAAAAGGGATCGTAGGGAAGAAAAGGATAAAAACGGTACAGAAAACCTATCACAAAACAAAAGCCTAACACAAATCAGTTCGACGTCGCGTTTCATCACAATCCGAGTAATAGTAATCCGTCCTACGGTTCACCGGGGGAAACATATTTTCGTGGCGAGAGAATCGAATAGTATATAAATCGCCG…
GSR_IOB_NIMR_829	scaffold00385-scaffold00013	KB664426	AGAP002707;	TTAACAGTAGACCTGCAACCAGCTCAGCTTCAGCAGTACGCACCAGCTTATTGCCACCAGCGTGGAACGGACGCCGAACAGCACCGATGCCTCTTTGCGATGCCCAAAATTATGCTGAACAGCGGCCGGAGTTTCACCGTTCAGAACCTGCACCTGGGCGGATCGACTCTGCTTGCCGGCTACGGTGCAGTTGTAGACGCCATTGTGGACACGATTTGCCTGCAGAATCGATATCCGGCTGATGAGCCACTGCTTGGTGCCAAACCAGCTCAGCATTAGCAGTGCGCACCAGCTTATTGCCACCAGCGTGGAACGGACGCCGAACAGCACCGATGCCTCTTTGCGATGCCCAAAATTATGCTGAACAGCAGCCGGAGTTTCACCGTTCAGAACCTGCAC…
GSR_IOB_NIMR_830	scaffold00144-scaffold00036-scaffold01188	KB664511	AGAP012163;AGAP012163;AGAP012163;	CCGATTTTTGTCTTGTATTTTTTTGTTTATTTTCAATAAATATACATTTCTCATTACCTCGCGCGCTAAGGGACACGAATGGGGTGAACCCATCGACCCCTCTCCCGCACCTGCTCTTCCTTTTTAGCGTGACTCCATACACTATGCTATGCTATACAATGAATGATTTGTTGATAGTAGTTTAAAACCCGTTATTGTTTAGTCGACAAAACCAAACACGCTTACCAAAATGTGTGTATGTGTTCGGTGTGTTTTGTGTGTGTTTCTCACCTTTCCCTCTTCCTCTCTTTTGCTATCCTTTCGCCGTTCCGCTACTCACACGCACACAATCACATACACAACTCGTTCTCGAGATTCTTCTTGCTTGTTGTTTTCTTCCTCTAACAACGATAGTTTGGT…
GSR_IOB_NIMR_831	scaffold02396-scaffold08306	KB664848	AGAP009254;	CAGTTTTATGAGCTTCCGATCGTAACAACATTATCCCCACTCAAAATGCGGATCGTGGCCATCTTTAATGCTCTTGAAGAAAATTGAACTTCAACCGTACACTACCATACCATTCGATGGAAACACGTAAAATTTGCTCCTCTCATTTGGCCGTACAAATTGATAAGTATTTAAACAATTAAACAAACACCACATGCAATTCTCTAACCACACACGTATTGTACTTTTAGGTAAACCACATCGAGCTTGCATTCACATCCTTAGGGAACACGCGCATGATACAAGTGTGCACCGGATCGGCCAGAAAACATAACGAGAGGCTTGGCTCCTTCCTTCCTTCATTCTCCAAATTGCTAGCGGAGTAACATCATACATTGGAGCATGTCAGCATATTGCAGT…
GSR_IOB_NIMR_832	scaffold00041-scaffold07424	KB664564	AGAP009777;	atacacagacacacacacacTGTGTTTTGGTTCGGTCCAGAGTATCTCTGTGTGCATCGGATTTTGTTCCATCCCAGACAGTTGAATTTACACGGTGAACTAGGAGGCAACATCTATAAGATTCCAAAGAAATGGTTCAGCGAACGGAGAAAATGGAGTTGCGCTAAAAAAAGGTCTTCCTCACGTCATATACTGTCGACTGTGGCGCTGGCCTGATCTTAAGAGTCAGACAGAGTTGAAAGCACTCGATATATGCGAGTACGCATATCATCTAAAGAAAGACGAGGTGTGCATTAATCCATATCACTACACTCGCATCGAATCGCATTCgcaacactcgcaacatcagcaacagcagcaacaacagcagcaacaacagcagcagcagcagcaacaaca…
GSR_IOB_NIMR_833	scaffold00270-scaffold00163-scaffold02853-scaffold03438	KB664874		aaagttaggttgagggtttcatattgcaaagcagaatttagcaactactttgaatatcgctttgatttgatcttgttttgttttacagttttgtagtttcttcaaaacttctcctactattggtataacctcatcgtgattaaaaaggtcattattgCCAAGGCTTTGCTTCTCTTTTAATAACGGAACATGATTTTCCGAGGATGTTTTTTTCGTATATGCGAACCATTCGTTTGCTTTATGAGCTTGTGGAAGAGGCGGAAAACGTTTCCGTGACAGATTCAGATGCGTTAGCCTGGGTGAAGGCGTCTCTTTCGATTTCGGTTTTTGTATGggtcttttcgggcacccatagtaaccggcggtgtggattccgtcgcaattatcactttttaattt…
GSR_IOB_NIMR_834	scaffold00129-scaffold00183	KB665010		TATTTTTCGTGTTGTGTGAAACTTCCTGCTTCGAAACGCAACAATAGCGACTGGTTAGTGCAACGTGTCACTACGAACCGTGTGTGCGAAGCTGTGGGTAGTAAACAAGCGGGTGCAAAATATCAACCTCCACAGCAGGAAGCGGAACAATCGCTCGTCACCGAGCCCGCCGAATCGTAGCGGGTCCTCTGCAAAACAATCCTAAATCTTGAACAAAGTTAGTTATCAATTCCTGAGATTATATTTTCTTCTAATCCCTCCGACTAGCGATCCAGAAGCGTCACAAGAGCGGTTTAGAGTGTAGTTATATCTCAAGGTGCATACCGGGGCTCTTCGATACAGGGCTGCTCTGTACCGAGGCATAAAGTGAATTGTGCGATCGATCGGGAAGTGAATCCC…
GSR_IOB_NIMR_835	scaffold00775-scaffold00076-scaffold19954	KB665176	AGAP000562;	GGTTGCTGGTTACGTTACCACAGTGCAATCCTCTGTGCGAGCCGTGCGCAGCTAAGGCCATTTCCGCAAGTCACCGGAAGTCGGACATACGCCAGAAGACGCGCCACGAATTTGCCTACAGTGTGAAGCGGTCAAGTTAGCGGGTTCAGGAAAACAGCAGCAGCAGCAGCAGCCCCTCGTCGGAGGAAGTACCGACATATTCCACGGCAACACCACCAGCAGACACATCAACTCGTGACATTCCGCGCCCGTGTCCAGAGTCTCGCTTTTTAGGACTCTGCACTAGGAACCAGCAACGCCACCCAGCGTATCAGTTCTTTCAACCCATTTTCTCTTCCGGGCTACGTGTAAACTACTATCAACCCAATCAAAATGCCGAAATCAGTTGACTATTACTAT…
GSR_IOB_NIMR_836	scaffold00051-scaffold00716	KB664634	AGAP005071;AGAP005071;	AATCATAACAACACACAACACTCGTCATTGGTTTAATGGTTTTATTCGACTCTTCTGCAGGGAATGTTGAGCGCATGCAAACTCTTAATTCTTTCTCTCCTTTAAGACGTATTCATTCTTATCAATAGTGCTGCTACCCTTCGCTATCGATTCCGTTCATCGTAATCGTGATTTATTTGCACTGTGTATTGCAACGTTTCACATTGTACATACTCGTCATTATCTTTCGCATCAATTAAATTAGTTTTGCTACACGTGTCGTAAGTGGGTAAGTTACAGTAGCGCCTTCACCGCTACCGAATGTCTTTTTTTTATGCAATTACACTACTATTGTTAGGGAAGATGAGAAGGAAGCGAAATAACATAATCGTTTACAGCAATATTCTAAAGTGGGAGTGA…
GSR_IOB_NIMR_837	scaffold00245-scaffold01903	KB664623		CCCTCGAAACAGGTTTTCCTTTATTCTTTAACTATTGGCTCACTGTTTTACATTGCCATCTCCCTATCCCAGGGCTTTGCGATCTGCGGTATCCTACTAACGCTTCGGCACTTTTCACGCTGTTCCCCTTCTAGCGACCTACGGGTGAAAATAGAAGAAGATTCCCTTTTGTATGCTTATTACACGTTGTGAACATTTATCTATCAAGCGCTTGGTAAGATGATATTTAACGCTTCCGTTTGGATCGTTCGTCATCGTTCGGGAGCGCAATAGGAAAAGCTGCAACCCAGCCAACCAGTGAAAGTACGAACAAGACGCAGAACAAATGTGGTGAATGTTGGCTGACCAAGCCAGGACCAGCACCGTTGATTAATAAATGTTAAACGGAACACGCGTAGA…
GSR_IOB_NIMR_838	scaffold00111-scaffold15770	KB664510	AGAP005368;AGAP005394;	CTACGGGATAAAGTTGCCACCGGTTTCGCGTGGCTTTTCGGTCGCGTACTTCGGTTTGCAGACGCAGCCACTCTCGACCAGCACGTAGTCCTGGCCGGTGAGCGTGACCGGACCGAGCGGGATCACCAGGAACAGGTACGGTACGTAGGTTTGTGTGCATTCGCCACGCACGACATCACATTCGGACGATTCGCACACCTCGAAGACGACCTGCTGCAACAGATCGGGGAACTTCTGCACGATCGTGACCGGCTGGCCGGAAGTGAGGCTGACACCGTACATCGGTGCGGTCGTGTTGTAGCGTGTTTTGCACAGCCGTGACGGCGTATCCCGGCACTGGCTGCTGTCCAGCGAGCGACTGTATCTCGTGCGGGCACTCTCGAGCGTGGCCGCCTCGTT…
GSR_IOB_NIMR_839	scaffold00014-scaffold01967	KB664592		AGTACTAACAGAAGAAAAAATGTTTTATTAAAATCATCCACGGGCGCAACACAACAGCGTTGCGAAACAAACGTACATAAAATTAAATTTAACACATCTAGCACGACTCCTGGAACACAAAAAGGGTAAAGCAAAATCATATGGAAGACTTCACTATGAAGTGATAAAACTGAAGTTGAAAATGAAATCCCATTTTTTCGTATTTCTGGCAAGAGAGAATATGACTGTTGCAAATCTTGCAGAGTTGCTCACACAATGATACAATATAAAAAAAATCCTAACGAACTAATCCATTTCCCTACGTTAATTGGTTGCGAAATCGTCGTTGACACGCGGTGCTTGGAATGAGTGAATATTGCCGCTCGTATTGCATTGTTGCTTTAAACGAATCGTTTTTCC…
GSR_IOB_NIMR_840	scaffold00020-scaffold00478-scaffold02877	KB664522	AGAP002670;AGAP002670;AGAP012108;	ATGTCTTGCTTTATTTTCAACATTGAAATATTACTTGTTTTTTGTTGTTGTAATTATCGATTGTTTTTAAAATTTAAATTTCTATACAAGCGCTAGATAAATATACTTTTTTGTTGTTGTTGTTGTTGTATTCAGAACCATGTATGAATTCTCAGCTGGGAAAATAGTATGATAATGAAAAAGAGAAAGAAAAAAATCACCAACAGCTTCACAGGTTATTGGCCGCCGGTTCGGTGTCCACTTGTACCGAACCGAAACCATCGCACAACAAAACGAGTAAACCGATGAGCAGCAAAAAGCTTTCTTCCAACTACCAGGCATGTGACATTACAATGCCTGACCAACGAATTATTAAACGAGAAGAAAATTATACATGTACATACGCGCCTTTTTCCCTCT…
GSR_IOB_NIMR_841	scaffold00134-scaffold23207	KB664744	AGAP008582;AGAP008582;	GGATATTGGCACTGCAAGCCTCAAATCCTTCGTACAGCATGCGAGCATAGTCGTCCGCTACATGTTGCTTCTCAGTACCGGTGATCGCGTCATGATGCTGCATCACTCCCATCACATCACGCAGGGCAGTTAGATGCGCCTCGTAATAGTCTTCCTTCGTTGGAGCAATGGCCGACAGTTGTTTGCATACCTGCAGGAAGTGGTTTCCCTCTCGCTCGTAACGCTTCTGGGTTGGTCGAGAAGTGTAGTAACCCGTCCAGAATGAATGATAATCGGATTCGTAAGGGAAGAAATCGTCAGACTTGGTCGGTAGTTCAACACCAGCTTCATGAACCGCCTTAACATAGCAGGAAGGTGTGGAGTAGAATGCGTTTATCTTCGAACCCTCAGATTGCCGTG…
GSR_IOB_NIMR_842	scaffold00132-scaffold04668	KB664444	;	GTGCCTGGATGAGGATGAGGAAATGGTGACGAAATTGATTGCTCACTATGACGATTACCTACGGGATTCAACACAAAGAAGATACAGAGCATTAGTGCTGGATGCAAAAACTATTTACCAATCTAGCCGAAGTAAACAACATGTACGTCATCGCGCTAATCTCTTCGATGGGTGGTAGAAATATGTTTACATCTACAAAAAGATGTTTAGTTTGCTGCAAGGAGATTAAAATCCAGCAGACAGTCGCTGACTTGGTCAGTAAACGTTTGGCTCGTGCTCTCGGAAAAAGTGTTCGGCCAATTGAAGTGAGCATCCTTGCCAATGGTACAGCTTCCGTGGATTTGGATGTAAGATTATCAAACCCTGTCATAAAATCGACAATAATGAACAGCAATTCAG…
GSR_IOB_NIMR_843	scaffold03421-scaffold10744	KB664544	AGAP008680;	ATTTCCCTAGTTCCCTAGGCCgctcatcgttgcgtgtcaccgcacacacacacacacaAGAACGGTTTGTAAATGGCCAAAGGTGTAATGTAATCCTTCGTACGGGCCCGGGGTATGCCTTTTTTCTCTCAGACTCAAGAGTTCCTAGGCTGCTCCGGTTCCTAGGCTCTTGGGAAGGCCGGCCCAATGACGGTATGTGCCTGGCACGGCAGACTTCGTATGGTATGATCTTCACCGTCACCGGCGCAATGTGCAACTGGATCGAGCTGCTCCTTTTCACTTCACAACACCGCAATAAATATTATCTTCTACCACGGTTTAATGATGTCGTTTTTTCTCAATTTCTAAACTCTTCAATAAACTGCCCGCCCGTCGGAATTACACACACACACACGAAAC…
GSR_IOB_NIMR_844	scaffold00577-scaffold09762-scaffold10508	KB665176	;	GTGAGGGAGAACAAAAATCAATTTGCTATATTTACACCCACTATCGACATACCTGAAACGTCTTTTACCAACTCATCACCAACTTTGCTTCCGGATCCGTACGTCCATCCATCCATCCGTCCGCACAAGAATCCATTACCACAGCGTGTAGTACACACCACATCTCGGTTTTCATTGGAGATCCCCTTTTTCGAGCGATCCAGACGAAGATGGAGAGAACGTAAAATACTACTCAACTCATGGGGTGTCTGGTGCTGACAGCGAGTCCTGCAAAGATGATTGCTGGTCGCCGGCGAACCCTGCAAATGTGTATTCCTTCTTCCTTCGCCGATAGCAGTGAGAGTGTTTCATCCTTTTTTTCACGAACGAATCGGAACGAACAGGCACGCTGGAGAGAAG…
GSR_IOB_NIMR_845	scaffold00007-scaffold21748-scaffold19232	KB664584		AATCTGTAAGTATATTTAGAGTTTTCAATTATATTACAttttctttttgttctgttgtcgtgttttcttttttcttccatttctttctctcctttccattCTACACCCTCTTTCGGCCGAGAAATATATGCTAGCATTCGCTCGGGGTTGTCTATAGCTTCGTATAAAATATATACTATATAATATATGCGCTCTGTTTTATATATATATACTTTACGTCGGCGCAAGCTGTATGATTCTTCCGCTGATTCTTACTGCTGCCTATATTACAAGCTACATTGGTTTTCTGCTGCTTTGCTTTACTCGCGATATTAGCGGAGCAGGATCGATTGTACAGTATCATTGCCAATTTTAATAATAATCTATAAGGGTGTTTTTTATGAACTGTGGATTGAGCTT…
GSR_IOB_NIMR_846	scaffold02237-scaffold00888	KB665321	AGAP009962;	AGTTCCATTTTTCCCGTGCAAAGCTTCTGAACCCAGTGCGAAATGGGCAACTGCCTCAAAGGATGCCTTTCCGACGACACCAATGGAGGGATGAGCCGAACGCGGATGAGTGCCAGCGATAGTCAGTACGAGATCCTGATCGAGGGAATGCAATGCACGGATGACGGACACCAGGATGGTGGTGGTGGTGGTGGCGGCATAGGCCAGGATGCTGGCGGTGAATTGCAAGAAGCAATAAAAATCAAATCAAATCGCAAATCAAACTTTTTCAACAAGTTCTGGACGAAAACGAGTGTGGACTACGCAAGACTGAACAAAGTGAAACACAATAATTTTTCGAAACGCGCTGTCACCGCTGGCGGACACACAAGTAAACATAATCAGCATCCAACGTCGGGA…
GSR_IOB_NIMR_847	scaffold00775-scaffold00076-scaffold19954	KB665176		CCGCATAGCTATATTTTCCATTCGCCGGACAACGAACATCACTTACTATACGTGAGGTGTCACTAGATTACGGATGTGGATTTCGACTTCCCGAGTCACGGCCAATATCTGCAATCCTCTGTGCGAGCCGTGCGCAGCTAAGGCCATTTCCGCAAGTCACCGGAAGTCGGACATACGCCAGAAGACGCGCCACGAATTTGCCTACAGTGTGAAGCGGTCAAGTTAGCGGGTTCAGGAAAACAGCAGCAGCAGCAGCAGCCCCTCGTCGGAGGAAGTACCGACATATTCCACGGCAACACCACCAGCAGACACATCAACTCGTGACATTCCGCGCCCGTGTCCAGAGTCTCGCTTTTTAGGACTCTGCACTAGGAACCAGCAACGCCACCCAGCGTATCA…
GSR_IOB_NIMR_848	scaffold01226-scaffold00029	KB664412	AGAP028093;AGAP028093;	CCCGTCGTGCTAAAATGAAAAGTGAATCTTCTGCCTGTGCTCCTACCGTCCGTACCATGTTTGTAAACACGACGTGGTGGTTGGTGTATAGTTAAGGAGGAACTTAGTGAAGGAAACAAAACTGTTTTATTGAACAGGCAAAACACAAGCAGAGCACTCAAATATCCACCAACGGGAGGAACCTCATACTTAAGCAAACGCTACATACTACTGCCCCGGCTGTAGTGTGCCGTACTGAAGAGACTGCCCGCTGATAGGTGTTCCTTGAACCGTCCAGAATTATCACAGCCACTAGCCCAAACAAAACAAAAACTGCCCTTCCAAAGCTCTTCCCTCTAGTTAGGCCAAAACAAGTGCACGAACCACCACTACCAGGGCCCGTATAGCAGGAGGTTCGTG…
GSR_IOB_NIMR_849	scaffold00014-scaffold11832-scaffold20030	KB664548	AGAP003405;AGAP003405;AGAP003400;	TGTTTTACATCCTTTTAATAGTATTACTTAATTCCTTTTTAGCGACATCATAATTACAATGTTTTTTTAACACGACCCACACTTCCCTAGAGCATCAATTGTACTGTTAAAAATAACAACAACTAACAAATGATATGATAAAGTTCCCAATTTGGCCACCGTACCGTCGTTCCCTCTTTTGTTTCTCTGGCCAAATTGGAATAAAAAAAAACCAGAAAGGTAAAACGTTAAAATTCATTGCGCCTTCTTTAAGTAATGGCTCAATATTTGGGGATTGGAAAGAAGGGAGGAAAAACAACTGACAGGTTTTTGCGGTGGTACATACACATTGGGAAAGATTCTAGCCTGAGGTAACAAAAAAAAATGGAAAGACAAAAGGGAAAAGGAAAACTAAAATTA…
GSR_IOB_NIMR_850	scaffold06347-scaffold00030	KB665016	;AGAP007307;	ACTGGGCAAAAGTTTATTTGCGATCGTGAGCGACCGGCAGATCTCTATAGTTACTATTAATCGTCGCCATTACGCGTGCGTCATAATCTCTACTGAAGCTTACCATAAATACACGCATAGAGTAAGTAGTACTGGCTGTAGCAGCTTAACTGACTATTCTTTTAAGTCGCGTTTGTTCGTATAATTAGCAAAATAACACTACGGAGCTAGGGGAGGGCTTTGATCATTTTAAAATCGATTCATTGCTAATAAGGAATCACCGTACAATCAATCCCAAACGCTCGTTTACGAGATAGGTTTAAGATAGTTGCAAACTGGATCAATACTGGATTGTATAAGTTGTCTTTTCCCACCACACGACTTGAACTTTGCTTTCTAGctctctctctctctctctct…
GSR_IOB_NIMR_851	scaffold00065-scaffold10608-scaffold21236	KB664461		TCGTCGATGAGCAGTGGGATCGTACCAACGCACCAGTTGCATGCGACACTTGCTGCTCAACGGAAGGTCCCGTTGGCCGCCATCAGACCTGTGGCTCTCGTGGCGTTTCTCGTGACTGAGTGCTTGCCGGCTCCGTAGTGCCCACCGTATCTTATCTTAGTGTTTGGTGTGACGGGAGTGTCACAGTGCTGTGTCGTGTGTCGCAACCGTTTCTGGTCACGCTCGAAATGATAAATTGATTCAGTGTTTGCGCTAGTGTCACCCCTACCTTGCCAGCAACCAGTGCTAAACGCGTGACGTGTGTAATGAGATATTAAAGCGTACACTAATGAGCAGTGTAAGCTCCGCACTAAATTGATCGGCGATTTGTTAGTGAACCAGTTAAGTCCAAGTCGCGCG…
GSR_IOB_NIMR_852	scaffold18998-scaffold00045	KB664545	AGAP007096;AGAP003168;	ACAACATTGAACCGTGTGCACGCAGCTTGAGCGCGCTCTTGCGCCTCAAATTCATAACAAAACACAAAGAAAACAATCATCTTTTTTAGCAGAAAGTGCTTTTTCGATTTATTAATAATTCTACAGACTTTCGAGAAGATTAAATAACATACGGTGGTAGAATTTTGCTCACTATCGTCACTGAACAGGTGTTGTGGAAGAATCAGTGCTTGGAGCTTCACGAAAGCTAAACGAAAATGTCCGCCTCTGGTCCAACATCGTTGATATCGACGGCTGGTGATGAATCGTTTGATTTCCTGTTTAAAATCGTACTAATCGGAGACTGTGGTACCGGCAAGACATGCATCGTGCAGCGATTCAAATCGGGCAACTTTATCGAAAGCCACGGCAACACGATCG…
GSR_IOB_NIMR_853	scaffold05646-scaffold00083	KB664583		AAAGCGACTGCTTGCATCGTTTCACCTTAAAATTTCCAATTTTATTTCATCCCAAAAACAAAAAACATACTACGAAAGCAAAGATTCCATCTCCTTTTTCGATCCACTATGAAAATTGTGTCCGCATCCTCCTGTGCTCATTGTTTTGCTAACTGTTCGTTTCATTTGTACCGCTCGATAAAATAGCTTGCCTGTGTGTGTGTGATAAACGCGTATACGCAGGCATCTCTAAAACAATAGGAATATATAGGCTCTAAAGGAGAGGAAAAGGTAGAAAACAAAGACCTAAAAAACGACGATAAACACTTTGTTTTAAATCGTAAAATTTCATCTAAACGATTATGTTTAAAACATGCTTCACACATTACGTACAGCAGTTTCCCTTTCCCCCTTTTTTTG…
GSR_IOB_NIMR_854	scaffold01601-scaffold00011	KB664844	;AGAP005155;	CACGTTGTGTTAATTTTTCTTATCAATTTATAGTACAAATTGATTAACTATTCACTAATGGTAATGGTAATAATAAATCGCCTTGTTTCCCCACGATGATAATCAATAATTAATAACGAATTAGCAAGCAACAAAACTCAACATGATGCGCATTCAAACTGGAATATATTGTTTCGCTTTTTTCCTCTCTCTTTGCTTTGTTAAACCTCCTTACAAACAACGAAAAACAAAACATATACCGTAAAGAAAACAATCAATCTTGCACCGCACAACGCAAACGCCTTGTTTTTGAATCGTAACGAATCACAGTCATATACATGCCCTCTTCACTTTCTTATTAATTTTTTTGCTTGGTTTAACTCATCTGTTTCTATTTCATGGACGGCTGGCTGTGTATAT…
GSR_IOB_NIMR_855	scaffold02776-scaffold22789	KB664899		TGTCAAACGACCAGCATTCAAGCCATTGGTATTCCACCGAAAATGGAGCTGACGATGCCGTACACACCGATATTCTACTGATCGCAGAGGGTAGGTCCAGTAAGTCGCTGGCAACTAGAAACCTGATGCTAGCGCAATCAAGCCAGTTAATTAGATGGAGTCAGTGTCAGTAAGTCAGCAGTCAACGCTGGGCCAAAGATTTTAAGAATATTGAAAGGTAGGAGTTTTATATCCTGCAGGATACAACTGTCACGATTACGAtcacgatcatctttaataactgttggagctggtgagaccatcccagcgttcaaaagtgaacttctCAAAAAAGGAATGTAGCGCAAATATGTGCTCTGGGTATGTTGCAAGGTGGCAAGGACTAATCGAATTATCTAG…
GSR_IOB_NIMR_856	scaffold18185-scaffold00099	KB664529	AGAP009483;	TCTCTCTCTCTCTCTCTCTTATTTTCAATCCATATTGTTTCGTGTGCAACAACAACCAAAACAAAAAAAAATCTTTATATATCTTTGTCGTGTGTTAATTGAGTGTAATTTTCATCCTGTGTAGCAGCAGCGCGCCCAGCCTTGTTTATGTGCATCGCCAACCACCACCACTCCATCATCTCTGTGCTCGCTCGCTCTTTCTCTCTGCTCTCTCACGCTATCTATCGTTCTATCTCGGTTCCGGAGAGCATAAATCTGAATGTGATCGTGTTGTTGTGTTGAATGTTTTGTGATATGAGTCGTACAAAATCGCCGAGCAGTCCATGCGGTGGAGGTGTGGGCGGTGGAGGGGCCGGAGTTGGCCCCATCTGTCCGCTGCGAAATGAGGAATCCGCCAAA…
GSR_IOB_NIMR_857	scaffold00019-scaffold04558	KB665321	AGAP002587;	TGTGTGACTGTACGGTACGTTTGTGTGGTTTAGTTTCCATCAATCTCATGTATCTTGATTTGTGCTAGAATTTTTAGGAGTGTTATCATCCCTTCGCTTTCACGATTCATTCATTCTTCCTTCCTTTTAGAAGTTAGAAGTAAGTTTAGTGGTGAAGTTGTTTCTCTTTTTTTGTTGTGTTTCCTTACCGAGCGCTACTAGCGTTAGTTAGCGGCTGAGTTTAGCTGAAGTTGATTTATGGTGGAAGAATAGACGGACGTGGGATAGTGAAAACAAATCAATGCAATGCATAGTGATTTGATTGCACCCTTTTCCCTTTCACGTGATTACGATATTCGTGTATGACTGTTATTCTTTGCCTGTCGTTTCATGTTTTATTTTACTCTTCGCTTGTCCGTT…
GSR_IOB_NIMR_858	scaffold00053-scaffold07900	KB664691	AGAP009451;AGAP004000;	CGCTGGCGGGGTACACGGTACCGCTCCGTCAGTCTATTCCGGTCGCTGTTCTAGCATGGACGAGCGATAATCGCAGTAGCATTAGAGCAGCAGTCGCTGTTGCTCGCACCAGTTCGTGGACCGTGCGTGCGTGCAGTCGTGCCGCGTGCTTAGAGAGCTCCCAGTGACGCGCATTCTCGCCGTGCCGATAGTGCTGAAAAGAGGCGCAAAAGCCGTAGCTGCGAGAGAAACCGGGGGGGAAAAAAATTTACACACGAAAAAGGTGATTTCAAGTGGAAGTGATCCGTGATTTTTTTTCACTTCTCTGTTTTGTGTGCGTTTTTGTGAGGTTTATGTTAAGAGAGGAAGAAACAAAACGGTCCATATAAAAGATCGATCGTTCGATTGGAAATTGCAACA…
GSR_IOB_NIMR_859	scaffold00105-scaffold00534	KB664453	AGAP010266;AGAP010268;	ACGTTTTCCGCATGTAACCTGTGTAGATGGCGCGTGAAAAATGCCCGTGTCCAGTGCCGGTAGCAGTTCCACAGCCGGAACCTCACTCGATCATGACGGCCACGGTGGAAACAGTTTCGGAACAGCTCGATCTAGCTGCCATAATGCCTTCGGAAAAGGTGGTACCGGCGGTGGCAAGATCGGTCACCCTATCGGAAGCAGACGTTGCCACTGCAACAGTGCAGATTGCCAAACCGAACGTGATTGGCGAAAGCAGCTCGGAAGGCGGTGGTCTGGATTCGGAAAACCTGGACGGGTCCCATCCGTTCGACGGCGACGAAGAGTTTTGGCACACCTCGGTTGGCAAGTTCAAATTTTCGATTGACACGCTGCCCCAGTCTTTGCAGTTCATCTATCAAC…
GSR_IOB_NIMR_860	scaffold00321-scaffold01711-scaffold00198-scaffold00164-scaffold00236	KB664510	;AGAP005397;	GGGTTTTGGACAGCAAGGGGGTGTAGGGCACAGTGTGCATTTTTGCTTTGCACAACCCTTTCCAGCAGTGCTTGCTGCGATCGATCGTCAGTCGTTTGCGTGTGTGATTTTGTCGCTCGCCGCGTCAGTCCGCCGTACATGTCCGTCCATTTCGGCATTCCGTCCGTGTGTTGTTTGTGGGAATTTTTTTGAGAGAAATACCTTCCCGCGTGTCGCTTGTGCTAAATGGAAAAGATCCCTTGCTCAATAGTGTTTCACAATGTGATCAAGTGGCTTTACAGTAAGGCAAATCATTATTGAATCGTGGGTTGAAAAGGCATCGATTGTCCGTATCAGAAGAAACGCCAAAGAACGAGCTAAAGTTGGCGGTGCTGCATCCATTCCCGGCGCTCGTGCTAT…
GSR_IOB_NIMR_861	scaffold00096-scaffold01098	KB664612	AGAP003475;AGAP000038;	CGGCAAATCAGCGCTCGCACGCGTTCCGTGCAACAATTGTAAATAAAGTGTATTTTTGTGCATTAAACATCCCGAATCCGTGAAAATGACCAGCAAAAAGTTGAAAGTGGAAACCGACGACGATGAGGAACATCGTATGGAAGCGAAAAGCGATAGCGATGGCTCGAGCGACGAGGAAAATGAGGAAGCATACGAGGGTGATGAAGGCATCACCGTTGATTTCGAAGGGCGCAATCCGATTGATCCGGATCTGGACGGCATCAAACAGCTTCTAGGCCAGCTGTTTGTGAAAGCACACATCGATCTGACCGAGCTGGCTGGAGTTGTTGTGGCTCAAAACTATGTCGGTAGTGTGCTGAAGCAAGCGTACAATGATGCCGACGATGACGAGGAGGACGA…
GSR_IOB_NIMR_862	scaffold00051-scaffold01371	KB665232	AGAP005125;AGAP006464;	ATTTTCTTCACTTTAACGCTAATGGTGGTGTTATAAAAATTACCTTCGGTATTGGAACTGGTTTTACAATTGCTATTGTTTGTATGCCATAAAGCTATAGGCGTCGAATCGAATGGAGAAAGATGGTACAAAACATTGGCGCTGCTTCGTGCATCGCCCGCCCGCCCATCCTTTTCCGGTTCGCTTCTGCACTTGTTATACACGTAGTTATGACGACGATGATGATGATGATGATGGTGGTGATGATGAAGATGCTGTGACGATGTGATGTTGATGGTGATGAGCATGACAACTATATGCAGTGAACTTTAATGGTGAACAACAACACTATGGGCGAATGGATTGTGTAGCTGTGATGCTTAACGGCTCTACTTCTTTTCTTTGTATTATTTTTTGTTC…
GSR_IOB_NIMR_863	scaffold00016-scaffold09089	KB665054	AGAP001415;	TGTGTGTGTGTGTGTGTGGATGTGCAGCAAACACAAAAGAATGCTGAAGTGAAAATGATATTTATATTCCGGCAACTGTTGATGCGAAAAGTGACGGGCAAAAGTGAGCTGTGTCCCGCTCCGGGCGTGTAATGCATTCACCGGGTACGAGAATCCCCGTTGGCCCGACCCCCGATGGAGTGTTGATTTGCGCTTTACCCTGTTAGCATTATTTATAAACAAGTGCAGCGTGCAGTGTGTTGTGTTGTGTTACATACCCGATACTGTCCCGGACAAAGCGTCACACCTCTTTACGATCTGGTTCGATCGTTGGTGTCACGGGCGCAGGTATTCCACGCGAGTGGAGGAAGCAGTGTGGGTGAAGTTGTTTTTCGTCGAAAATAAGAAGAAGTGCTTCTG…
GSR_IOB_NIMR_864	scaffold00076-scaffold09642-scaffold00847	KB665176	AGAP000009;AGAP000009;AGAP000009;	gtgtgtgcgtgcgtgcgtgcgtTTAACTCGCAGTTTCGTGCTGTGCCCGCGTATATGCGTACGTGAAAAGCAAAATTCGTCCTCCCTTCTCCCATCCAACCCCCCTCGTTGCCACCGCCAACGTGGCTCACTCCCTCGTCACGCATTCCTTCAGACGTGTAGGTGAGCGGTATACAACACCATCATCACTTATCAGTCTCTAGCTGGAGCTGGATACAAACAAAAGCGAAAGAGCAAGAGAGAGAGAGAGCGCGCGAGCGACCACGTATACGCCCGTCATCCGATTTCCGAAGGAACGGGGCCGAAGCGAGCGGGGCAAGCTTCCAGCTTGTGGAGAGCGCCTGAGGGCTGTCGGCATGCGCCACGATGGAGAAAGCGAGACGGCATAACGCATTGCTT…
GSR_IOB_NIMR_865	scaffold00105-scaffold00534	KB664453	AGAP010266;AGAP010266;	AAGTGACCGAGCTCAGCAGTAATTCCGCATTTCGCGTGGCCAATAGAATAATAAAAAGCAAAGTGCATACTTTTTCCTGGCCCTTTACGTAACCCTGCGCTCGAAAAGGATTAGGTGCAGTGGTTTTGTGTTGATTTAATCATTTCGATATAACTCAATTGCGATCGATGTGAAACGTGCAAAAATCAACATTCGCTCTCTTTCTGAAATGGAGCCATTGGCTATTTAGCAGTGATGTGAAAATTTGGCACAGGGAGTGGAGTGGTTGGTTTGCTAGTTTTCATCGCTCTGTAGTGATAGTGATTTTCCTGCTGCGGACCACTGATGTGGCTGAATACTGTGCGGAGAAGGGCGAGTGTTTTGTTCGAATTATTGCAACATATTGTACGAGGAGGTAGT…
GSR_IOB_NIMR_866	scaffold00084-scaffold02493-scaffold02271	KB664988	AGAP011765;AGAP011765;AGAP011765;	ACAGAATCAGAACACAGTGGAACGCGGAAAGCGTACATAAAAAGTTTGTTTTTTTTTTGCGGTGTGCCTTGCGTGGGAGTCTTTTCCCGGCTCTCTATTTCCTATCTGTGCTTTCGGCGGTGCCACAAAAACAGGGCATCCTGAAAATGACAGCCAAGTCCGTGAGTGGTTGTAATACTACGGAGAGCACACAATTGCGCAAGCGCGGCGAAAAGCAATCGCCCGAAGTGTGATGAACCAAAACACGACCGACCACCACATCTAAAGTCGGGGCTTTTCCAGAAGAGCCAGTAGCAGCATAGTTCAGTTTAGCAGTGTGCCATTCCGGAAGTGATCCTAACGCTTAGTAGTGCTTAAGTTGAAGGGGGTTGAGTGAGTGTGTTTTTAATAGGAAAAATA…
GSR_IOB_NIMR_867	scaffold01030-scaffold06797	KB664635	AGAP013400;	CGACGACGACGACGACGACGGTTTACCCGTGCATTTGAACAGCGGGAAGCGTTATCTTCAACCGTTACACACGAGTCACACCTTGTTGTCGCTAGAGGGCGCTCGCTTATCGGAAGGGTCGGCTTACGATTACGAGCCGACGCGCCTGAGCGGCTGTTGCGGCTGTGCGTATTTAACCGCCCTTTGCTGAGCAGAGAGAGCCAAGTTCGGTGCCAGACACAGTGAGAGACGGACGTCGCGTTTTCCCGGCCTTTTCATCTTCAGCGTGCAGTTCGCAAGCTTCGTGCATTTTACATCCCCATCCCGTGTGTAAAACCACCTACATCTACATCCACAATGGCCGTCTGGGAAGGAAAGAAGTACAAGATGGAGAAGTCGGAGGGATTCGATGACTACATG…
GSR_IOB_NIMR_868	scaffold00625-scaffold11249-scaffold06097	KB664500	AGAP010702;AGAP010702;AGAP010691;	TCATTTCTTCTTATTTTTTCGCTGCTTTTTCTCTAGCATTCGCTGTTCTTCGGCCTTGCGCACGAGGCTAATGGCGGACTGATCTTTCTGGTCCACTGGTCCGCTCTGCATAGCGCCCACGTTCAACGACGGATAGCTCATCTCAAGCTGATCGGCAATGATCGGTTTGGCCAGCAGCTGGCTAAGCTCCAAACGTCTCGCTTTGAACTGACGCTTGCGCTTCGTCTGTTCCAAGCGTCGCATACTCTCCTGCTCACTATCCACCTCCGAATCGCTCTGAAACTCTTTCGCCAGCTGATCTTCCCACGAGCGACTCACGGTTTCGCGGCGCTGCTGCAAATCCATACGCTCGATTTGACGAGCCAGCGAAACTCGTTCCCTTACCTGCTTCATCACTCG…
GSR_IOB_NIMR_869	scaffold00036-scaffold03412	KB664552	;AGAP012108;	GCAGTCCATTGACAGCAAGGCGTGACAACACTTTGCCCCCTCTCGTCCTCCTTTTTCACATTTTCTTCACCCCACACACACACACACACCAACACTTCATTTCTTTCATACGTCAAACGAGCGTTTGTCAAAGAGCTTCTAAATTGTTTTGGAAACTTTCCAAACTTTGCTACTGCGCGAGAAAGCAGCTCGTCCGGTTCGGTTGTCGCGTTATTTTGCGTGTGCGTTCAGAGGATGTCGAAGAAACCAACGACGGGCCCGGCCCTGCATAAGGTCATCATGGTCGGCAGCGGCGGTGTAGGCAAATCCGCCCTAACGCTACAGTTCATGTACGACGAGTTCGTGGAGGACTACGAACCAACGAAAGCGGACAGCTACCGTAAAAAGGTGGTACTGGAC…
GSR_IOB_NIMR_870	scaffold00132-scaffold00109-scaffold00021-scaffold00032	KB664855	;	ttgctggaaattTTCAGTTCTGTTCCAATGAAAGGAAACGTTTGAATGGCTTTGAAATCAACACAACGCAATGTATGCAATCCGCACCACACCAAGCGTTACCAAGCGTTACGCCGTTTCTCGCACAGTGCACACTCAATCGTTTTGTTGTTTAATCCAAggtgtatgtatttagaaggtggatttttatcgatttgactgggcgacattttagtcgagttatgtcagagtttgtttacaaaaacatatggtatgggcaacaaacatgaacaaacagcctcgattctcaatcccttgagcaatttcgctaatttatgggtcatctttgcatatcaaatgttgttccacagaagattgacgatatttggttgcatttttcgtcaaaaaatcgcaagcgat…
GSR_IOB_NIMR_871	scaffold00081-scaffold05054-scaffold15831	KB665154		CGTAGATGCGAGTGTGTTTTCCTCTAGACCCACTCGCTAGTTTTGTATTATCTTTGTTTTGAGCTACACACGCTTCCCCACATTTCTCTCATCAATCCCGAAAATAGTAGTTTTTTCAAACACCACACACATCGGCAAACACTGGAAAACCCGGCCACCAATCCTCCAGTTTTCCGCACAGCGTCAGAACAAGCATATACAGTGTAGCAAGCAAGCAAACCCGAAACAAGGTATCCTGCAACTCTCCCGGTAAAAAGTGACTGCTGCGCCCAAGCAATACAACCAGTGAGAACGCTTTATCCAGTGAACAGTGTGCTTAAAATCAGTCAAAATAACCGCCTTCGAAGCAAGCATCATTGAATCCTTCGCCGAAATGGAGGACACCAAAATGGTCAAGAT…
GSR_IOB_NIMR_872	scaffold00062-scaffold02193	KB664444	AGAP004731	AGTAGGTTTGCGATCCAAGTACACATAGTAATGAAAGGAAGGAAAGGAAGATTGTGTTTTGTTTCTCTGCGCACTGATGCAACGGTCGACGATGTCTGGTGGTGCTTCCGGTTGGTGCTTCAGGGTGGCATGTTGCCCGGCgctgctgctgctgctgctgctgctgctgACAAACCTGCTACAGCAGGCACAAGTTTCGGCCAGTTCCGTTCTAGTGGCCGACTTCCGGATGACGCGGATGGTCGAACTTAGCAGTCGACCTCCTTACTGCAAGATCCACTCTGATCGTGGAGACATTCAGCGAATGTTGCTGGCATCGGACACGAAGAAGGTGCGGCAAGTGCCGCGCGAATCGGTCATAGCACTGGAGGAAGTGTGCGGCGAAGCGAGTGACATTTC…
GSR_IOB_NIMR_873	scaffold00791-scaffold10968	KB664452		TTTAAATTCTTTTTTTTTTCTATAAACACCTATTGTTGTCAAAAAGTGTGCTAATTAAAAATATTTAAAACATGTTTTAAAATATTGAAAGGACGTCTCATTTCATAAATGTCAACTAAACAAAATTTCAACCTTTTAACAATTTTTCTTATATATTTTGGGAAGAAATGTGTGTTGAAATAACGATTATGATGGATTCAATGATATTTGGAAAATTATCAGGAATCTGTGGGACAAAATCACCAATATCTAAGGGAAGCGTCGACAAACCGCGAATCAAAGCCAAAAATATCTAAGAAAGCGTAAAATAATGACAAAACGAAACATACATAATATTGGAAAGTCGTCTAAAAAGTTCGCGACAAAAACAAAAATAAAAAGGATTTTGTCTAAAAATCT…
GSR_IOB_NIMR_874	scaffold00080-scaffold01370-scaffold11193	KB664954		AACGAGCGGCGTCCAGTGCAGATCGTAGCGGACTTAGCGCAGCAGTTGCGAACGAGTTCCGGTGAACCAAAGGTTTTGAACTGTGCAAGTAAGGCCCACACGACGGCGGCGCGCTACCACAATAAGACGAGTGCAGCCAAATTCGGAACAACGAGTGAATATCGAGTTAAAGAAGCAGGCGAACGTTTGCCCAAACAACAGCCAAGTTTCAGTGAAACGTTGTCACACTCACCTAGCCCGGGACATTGTTTTGCTAAGTTTTCCGCGATTTATAACCCCCCACCCGGTGTGTGTTGTGCCCCATAGAAAGGGAGCATACATTTCCGCGCACAACAGAACAAACGCATCAGTGAGTGTGTGTGCGTGTGTGTAGTAGAACTTCCGCGATTAGAGTCGAAT…
GSR_IOB_NIMR_875	scaffold03767-scaffold01577-scaffold00578	KB664445	AGAP004968;AGAP004968	AAGTTCTTACTGTTGAAGAAATACTGTTTTCCTTTTACAAAAAAAACCTAAACATGCTTTCTACTGTTACGGTACTACGATAGGAAATACTAAACATTACATACAGTTATCAGTAAATGTGTGTGTGTGTGCAGGCAGGCAATGTTGTGTGCCCGGCCCCTAGTAGTATCACCATTCGAGTTAATTTAGGCAAAACAAAATCATTGTTAGCCTTCAGTTGGTGGTGCGCCGGCCAACTTTGGAGCGCTTGCTGTGAACCCACCTCACTTCGCTCGATGTAAAAAATCGTGGTGAACAAATCTTAGTAGCCCTAGGAAGAATCCATTTAACGCAAGTCATTTGAAGGCCATCGATGTGTGTCTATGCTTATCTATCTATCCTATTTTGGGTTTGGATTAG…
GSR_IOB_NIMR_876	scaffold00097-scaffold01482	KB664544	AGAP008656;AGAP008656;	TCATTGCTCTTCGGTTTGGGTCGTCCGAACGATTTCCAGCGTCCGAATTGGTTCGTTCGTTTGAAGTGCATCGATTTCCTCGATCACCACCGACGTTACCTTCTTGTTCGAGTCGGCCGATTCAGCGTTAACCGTTTTGAGGATTTTGCCGTGATCTGTACCGACAAAGATGACATCGTACGTTTTTCCACCGGGCGTTTTGATTTGAGGGTCTACCGCAATGGCAGTGAACCGATACATCGTGCTGACGCGCGTCAGGATGGGAGAGCCGAAAAATGCGGGCACGGTTTCGTCCATCAGCGAATGGGTCTTTTTGAAGTTGAGCGTCAGATCGGGCAGGGTGCGCGAATCGTTGTGGCACGAGCCGGGCCGTGGATCAGGAACGTTTAGCGGGTTCAC…
GSR_IOB_NIMR_877	scaffold00048-scaffold01567-scaffold02324	KB664356	AGAP013324;AGAP013324;AGAP013324;	NNTGATTCGACCGACAAATGAGCTGTGACACGTGATTTTCGATAACCGAGCGGGGGAGGGACAGTTTCGGCATGCTTGCTCCCGTGTGCGTTTTGAGGCCAGATATTCCTGGAACTTTTTTTAAATAAAACTACGAACGATGTATGCTTCACACCATTTAGCTTTCCAAGCGAAAGGGAAAAAACTCAAACCCAAACAAATAAATCATAACGGGGAAAATGAAATTTATTGACCTGCCGGATGATTTTAATAGCGCAGTGGGATGAGTGTATCGATTCGTTGTTGTTTTCTTATTTTGGCGTTGGATAAATTTTAATAGAGAATGATTTTTAATCTGCTTTCACCGTGCCCTTTTTTGCCTGCTTTGCCGAACACAATATGGAAGGACGCTTGATGAAA…
GSR_IOB_NIMR_878	scaffold05589-scaffold00026-scaffold00023-scaffold17636-scaffold00021-scaffold00184-scaffold00031-scaffold00141-scaffold00028-scaffold00013	KB665065	AGAP004438;AGAP004438;AGAP004438;AGAP004438;AGAP004438;AGAP004438;AGAP004438;AGAP004438;AGAP004438;	GGTACCTAGCATTCTCGGGAGGCGTGTGTGTTTCGCTGTGAACGGCTTCATTTTTGCTAAATAACACATGAAAAACAAAGAAAAGCGATGTAGTTGAGTGTGTTGGAAAGAGGAATGATATCGGTGTTGTGTTTAGTGCGTACAAAATGCGTTTCACGGTTTGATTAAATCGCTACGTGCATTTCAAGTCCGGCAGCCGCGAGCAGTGCTGTCGAAGAGGTTGAGAGATGCATTCGCTGAAGCATTGAAGTGACGCGTGTAAACGTTTGGGGTGATAGTGTGCGTGAAGCCAGTGTGACAGAGTGGGGTGTTTTATGTAGAGAACTGTCACTGGAAGAAGAAAAATGGGTACTGCCGTGGTGCCCACGTAAAATAGAGAAGATTGAAAACAATTTCAGC…
GSR_IOB_NIMR_879	scaffold00123-scaffold15468-scaffold00143	KB664889	AGAP004303;	GATAAACAAACAAACCACAGAGCAGCGCACACAACATTATCTGCAACGCAGCATAATTCAGCACGGACCAGCGCACCAGCATCCATCCAAACCAGTTAGTTGATATTCAGAGGCTAATCCGAACGGTATCTAACTCCGCCGGTCAATGGTAATAAAGTTAAGTTTTTTTTTAAACACTTCTCCCGGACACCGTGCGTTAACTTTCGTGTTTTGATAAATTTTACCAGCATTACCTTTTGATCATTTGGAGTAATCCAAATTGTTAAGATTCTCTTTTGATCCATCATATGTTTGAACAAGTTCATGATGTTGCAATTTTAATATCGAAATGCGCCATTTTTTCTATTTGAGAATCGTTCAGTCTTGTCATTTGTTAATTGTTCATACGAAACTCAATCG…
GSR_IOB_NIMR_880	scaffold00008-scaffold00517	KB664400	AGAP005619;AGAP005619;	agcagcagcagcagcagcagcagcagTGTGAGTGCGCTGCGTGTGTGTGTTTTTTTGCCTTCCCTAACCCATTGTAAAGTGTATTTTTATTGGTGAAGAAAAGCGTGGCGAAGTATAGATTGTGTAAAACGTTGTAGTGATTAGGGTTACAAGCAAACCAAATAAACACACACAGAAAAAAAATCGTGAAAAAGTGACCGAGTTGTGAGTGTTCTTGCCATGGAACGTATGGAGGTGGACGATTCGGCCGTGGTGGATCTGAGCCTCGGTTCTGGCCGCTCTTCGATCACGATCACACCGTCCACGGCGCGTGATTTGCGAGCGCTGGCGAAAAACTCCGGGCTTACCATCACCCCCGCCCTACCGCCCGTCTCATCCTCCCATGGAGTCAATCCGGGT…
GSR_IOB_NIMR_881	scaffold00948-scaffold20704-scaffold22025-scaffold00261	KB664618	AGAP013400;	AGCGCCGTTGCGAAAAAGGACGTTTCCCTTGTTATTATACAACGAGGGGAGGTCATGTGAGTACGACGGCATTGTGTTTGGCCATCTTGTGTGAATAACGTTAATTTATCAGCTTTTCCCCCTTTGTACTCAacacacacacacacacacacCTTTATATGATCCACCGAAAACCGAGAGAGGCAACTTTAGGGATTATGATACAAAACAAAAAACAGAAACAAGCAAAGCGAAAAACAAACGTTGTAGAGTAATTGTGCATATAAATACATAGAGTAGATTAAAAATCTAGCAACAAGGTGGAAAAGAAAAGAAAATGACGAGGAAAATAAAACAGAAAAGATCTAACTAAGCAAAAACAGAAAGTTCGATCAGAAACAATATTGCAGGGAACGCGCA…
GSR_IOB_NIMR_882	scaffold00824-scaffold13812-scaffold00124	KB664799	AGAP006441;AGAP006441;AGAP006412;	ATGTCTACAGCATAGGCCTTGAACGGTGCCGTTTTCGACGAGGATCACGACGAAATGGTTGTGGTGAAGGACATCGAAATGTTCTCCATGTGCGAACACCATCTGGTACCGTTCTACGGTAAAGTTTCGATCGGTTACTTGCCCTGCAAGAAGATTCTCGGCCTAAGCAAGCTGGCCAGAATTGTGGAAATCTTCTCACGCCGCCTTCAGGTGCAGGAACGGTTGACCAAGCAGATCGCGGTCGCCGTCACACAGGCGGTACAACCGGCAGGTGTTGCTGTCATCATCGAAGGAGTACACATGTGCATGGTGATGCGTGGCGTACAGAAGATCAACAGCAAAACGGTCACCTCGACCATGCTGGGCGTCTTCCGGGACGATCCGAAAACGCGCGAAGAG…
GSR_IOB_NIMR_883	scaffold00076-scaffold04611	KB665176	AGAP000005;AGAP000005;	CACCGAAGCACCCAGGCAGCAGCAGCAGGCAGCAGTAGAAGCCGAAGCCACAGTGTGTTGGCCCCTTTTGGCGTATTATAGCGAAGCATAAAAGCAGAACAAAAACGCACCCATTGCGTGCGTGCGTGAGTGTGTGTGATTTATTCAAGTGTGCGCGTGCACATAACAAAAAAAAGCAAGTGGTGGTGGTGTTTCCGTGCCAAAGGGAAACACACACACACACAAAATAGTAACAACCAAAAACAAACATACAGTGAAACATAATATAAGTGGTGGTGGCGTGTGAAAATCCCCAAGAGACGGGCGACAGTAAGTgcagcagcagcagcagcagcaAAACCGTTTCTAACCACAATTATACAAATCACCTGATGCACCGCTGGCGCGGACATTGTTGTG…
GSR_IOB_NIMR_884	scaffold01354-scaffold04422	KB665288	AGAP008510;AGAP008503;	GGAGTCTTTTTTTAAACCCCCGAAAATCAAAGCTCAAACCCATGAAAACATTACGCAAATACTTCTGCTTTCCACGGTATGCCAACAATTTTTTCATTTACATTATCAACTAAACTGCAAGCCCGAACAGTTCCGAACAACCTATCACAAACGACCTGCTAAGTGGCAAATAATAGTGTGCAAAACGGAAAAAGGTAAGACTGTCTTTTTCCCGATAGCGAGTGTAACGTGTGTAAGGTCGTGTAACTGCAGCTTAGATAACGTGCCATAATTGCTAACAATGGCTTCCACTACTCCAATGTACAAGAAACATGTCATGTTTCATGGATCAACTTCCAGTGGCGCGCTTAAAGTGAACCACAGTCACAACAACAATTATTCAATCGATTGCCGGTAGTG…
GSR_IOB_NIMR_885	scaffold23045-scaffold04093-scaffold00105-scaffold00042-scaffold02933	KB664867		GGCAATACGGCCCAACCAAACATGGTCACTTTCTGGACGCAGGAATATTGAAGATGGTGGAATTGTTTTTTTTTGGTAATATCCATTATTTACATTAcagggtttctgagaagaactaacgatgtgcgagccatttctgggcaatggtcaggatgaagtaaaccattgccaggaagaactggcaatctgttgccctttctggactatggtcaagttgagctaggcacaggctaggttgatgtggaggatggccaggttgaactgaaatgtcaaatttgaaacgattgctgaagcgttcgcaaacgtttggggtaacgcttgaaaaatattaaaaaataaccgataaaaaacatatttttttgtaattaattggtaaaagactagggaaggcccccctag…
GSR_IOB_NIMR_886	scaffold06044-scaffold06680	KB664475	AGAP011503;AGAP011503;	CATAGTGCGAGTGATTAAAACAATTTATTTGACATAAAACTTCTACAAGTTGTACACAATTTTTCAATCAAATTTCAAACACGGATCATTCCTTAATGCACTTTGAAGAGAATTCCTTAATTGCACTTCCACGATTTTCTGCCAGCATCATGGCCACGTGACACGAACACAAGAGTCACTTCTTGTTAATATCGAGTAATTTATACAGCATTCCCTCTCAGAAAAAAACCCTTTATGAGACGGCGATTATAAAGATAATGCTGGTCATGGGGTGAGTTTTGTGTCCTGGACGCACACACACCAAAGGATGATTGGATCGACATAAAAAAAGATTTTCTATTTCTATTACAAAGATTCACTttgacgctcgaaagctgcttaaaagctggttaaaagttc…
GSR_IOB_NIMR_887	scaffold00002-scaffold02776-scaffold08599-scaffold19826	KB664899	AGAP004303;AGAP004303;AGAP004303;	CGATCTCGACGAGTGCGGACGCAGATATCTCCTTTCCGTGGTAATGTGAAACCTGGGGGGCGCACATGCTAAACAGCAACCCCACAGGCAACTTGGTTGTCTCATCATCATTATCGTGAAGGAAACTGAAAGCCCCGAAAAATCCTCACCGTCCCATCATTTAGCACAATCGGGGCACTCGGTTCCGCATCGATTCGGAAGTGTGTGTGTGTGTTCGAACATCCTAAACCCTTTGTGAGAGTGGTGTGTGTGTGTGTGTGTCCGTCCAAAACAATGAAGTCCCTCCAGCGGATGATGGTCGGTGCCGGACTCGTGATCGTGACGCTCCTCGCCCTTGGCGGTGAATCGTTCAACCTTTCGCCGGTACCGAACTACGTGTTCCGGGAGCCCGATCTGCAG…
GSR_IOB_NIMR_888	scaffold00129-scaffold00183	KB665010		CGAGATCACTCCTCATCCATTGCCTGGCTGGATCGCGTAGGGTTCTTGCGGGTTGCACGTTCGGTGTGTGTAGCTGGGAGCTGTTTGTCATTAGTTCCGACAATTTCTCCCCCCCTCGAAAGGCGTTCGCGAAACGAGTTTCAGTTCTTTTGCTCGATCCAGAAGCGTCACAAGAGCGGTTTAGAGTGTAGTTATATCTCAAGGTGCATACCGGGGCTCTTCGATACAGGGCTGCTCTGTACCGAGGCATAAAGTGAATTGTGCGATCGATCGGGAAGTGAATCCCAAAACCCACGGATACAAAGAAAGTGGTGCAGCTGCGGTGGGATTTTTTTTCCACCCCAAGTGTATTGTATTTGTGTGCGAAATTTGAAAACAAGCGCAGTGATCGTGCACGGA…
GSR_IOB_NIMR_889	scaffold00094-scaffold00971-scaffold10587	KB665254	AGAP008755;AGAP008755;AGAP008755;	gggaaaggaggggggcgggTGGTTGGGTTTGGGTTTTCCGGGTGTGGGAGAAAGGGAAGAAGAGTTGAATAAAATAAATACAAATTGTTCATATCCATATATCATATGCGCGTGCTTGCGACACTCTAAATTTGTTTCTTCGTACTACCCCACGTGTTCTTCCGAGCTCGATACGGACTTTGCCTGCCTCATCAGCGCACAACTCACACACACCCGCCGCGTCCTCTTGTACATTTTATATCTGATTGCGCGTATCTTTAATTGTCGACTGATACATTATGTTGTGTTTATTAGTAATTTGCTTCTTTGCTAGTTTGCTCCGAATTTTTCTTTTTGAATTGCAAACGGACGAGAGTTGATCGTGTGTAAATGGTGCAGCATTATTACAACATATTTCCA…
GSR_IOB_NIMR_890	scaffold00010-scaffold01295	KB664477		TGAGACCGCCGATGAACATTTTTCCTGGATCGTTCGGCACCTCAGCCTGATTGTTGCCCGGGTGCACACCGAGGTCCTGGTTCTGGTGCTCCATACTGTTGCTCGACGGTTCGGCTTCGCGCTGTAATCTACGAATTCCGCTGACACTAGCGTTAAAGCTGGCCTGCTCGAAGTTACCGGTAGCCGGGTTGCGTATTAATTCCTGACTGGCAGCCAACAAACGGACTGACCCAAAACGGAGGCTTTAACTTGAACTTTCGCTTCCTGAATGCTCTTTTTATATATTTCACACCTTCACGCTTCCTTCTAGACTAGCAGAAGCGGGTAGTACACAATTTATTTTCTTCCCTTTCCTGAACACACAAGCTTATTATTATTTCCTTTTGCAAGGGATAATTT…
GSR_IOB_NIMR_891	scaffold02840-scaffold02101	KB664622	AGAP013380;	TCTATCTTGTGGGTTGAATGATCTTTTTGTAGGTTTTTCCTCATACGTGGAGTACTCTTTCTCCTTAGGCGGTAACATAACATCTATACGAGATCTGATCTGCCTTCCTAACATCAACATTGATGGACTCTCTCCCGTAGATGGATGCACCGTTTTTCTATATATCATAAGTATATTTTGCAGTTGCTTAGATATTTCAGAAGTCTTGCAATTCAAAGCCTTAATCTTTTCTTTAATCGTCTGTACATATCTTTCAGCCTGCCCATTTGTTGCTGGATGATATGGCGCTCCCATTTTATGGACAATCCCATTTGCTTTTAAAAATGATTGAAAGCTTTCAGATGTAAATTGTGTTCCTCTATTAAACGCATCAACTAAAATGAGGAAATAGCATCCTTG…
GSR_IOB_NIMR_892	scaffold00029-scaffold01226	KB664412	AGAP028093;AGAP008412;	GGAAAAGCCTCTCACACACAACACATGGGGAGAAGGTTGCCATGAGATTTTTCCAACCACCTTCCGTAGTTGCAGGTAAACACGACGTGGTGGTTGGTGTATAGTTAAGGAGGAACTTAGTGAAGGAAACAAAACTGTTTTATTGAACAGGCAAAACACAAGCAGAGCACTCAAATATCCACCAACGGGAGGAACCTCATACTTAAGCAAACGCTACATACTACTGCCCCGGCTGTAGTGTGCCGTACTGAAGAGACTGCCCGCTGATAGGTGTTCCTTGAACCGTCCAGAATTATCACAGCCACTAGCCCAAACAAAACAAAAACTGCCCTTCCAAAGCTCTTCCCTCTAGTTAGGCCAAAACAAGTGCACGAACCACCACTACCAGGGCCCGTATAG…
GSR_IOB_NIMR_893	scaffold00053-scaffold00074	KB664543	AGAP009431	TTTTATTCTTCGAAGGTATGGAGTATATTTTACCATTGAAATACTCTAGCAAAGCAAGACCTCATACATTTCTCTCACAATTTGTCATCGTATTCATGGCAAGCAATTAAGCACTCATCGTACACCGGGCTCAAAGTTATGGTTGTTTACGGAATTTTATTCACATGCCCCACCAAATACAAAGAAACTGTATTTAATAGTTCTTAGACAGTAGACCGTCTTTCTTGGCCAGACGAACGATGCAGTCGTCCGATTCACCCATGCGACGGATCTCACCGCAGATGGCGTACACCTTGGACGTGTCCAGCATGCGGCCAGTCTCCGGGTCTACATCGACGATGTTGATCTGGATGGAGGCATGATCCTTGGCGTGGATGATGCGGTTGCTCGACGAGGGGG…
GSR_IOB_NIMR_894	scaffold20637-scaffold15758-scaffold06471	KB664840	AGAP005785;	TTTGTGCAAATTACTCTGCCCAACATTTAGTACTTTTTGAAAAGCCTCCGAAATCCGTTCGCATTGTTTTTCCGTCCATCGTTTTATGCCCAATGTACCGTCTCGCCATCCCAGAAGCAACCGCTTTGTTGCTCCTAAGTCAATAAGATGCATCCGATCTGCTACACATATATCTTCAATAATGTCGAAAAATAGAATGTCCAACAGAGGGGTGTGCACTTTGCGGTGTCCGGGATAAGCGTCATTTCTGAATGCTTGGTCTGTTCGTTTTGGAGCATTTAAACCGACAAATGTAACTTTATGGCCCAAATACTCTCCTTCGATAGTACATTTTAAACAGCTTCCGTAGCCGGTGTGGCTAGTAACACCTTTCACAAACGACCTTGCCGGCGTGTCAGC…
GSR_IOB_NIMR_895	scaffold00020-scaffold18275	KB665099	AGAP002587;	CATCCGTTCGGGCATTAGGTGACGCATCAGCGCAAAATGGCCGCAAGTGTAGTGCAGGAAGCGGGCAGATACCGGCGGGTACCGCCCGAAGGTGGCTGGGGTTTGCTGGTTGGCGTGGGCATGGCCATGATGTTCGTCGTGACGCTCGGCTCGCTGCCCTCGTTCGGGCTGATGTTTGGTGACTTCCTGACCGAGCTGGGCGAGGAGACGAGCGCGATTGCGCTCATCACGAGCTGCTTCTTCAGTGCGCTCAGCTTTGCCGGCCTGTTCACCAACACGCTGATGAAGAAAACGTCCTGCCGGACGGTCGGGCTAATAGGGGCCGTGTCCTACATCATCGGCAGCATGATGACCATCTTTGTGCGCTCCACCAACGAGCTGCTCATCTCGTTCGCCGTC…
GSR_IOB_NIMR_896	scaffold02271-scaffold02493	KB664988	;AGAP011766;	GATTGTAACACAGCCCCGCAATGGTGGACAACCGTGCCCACCGCGCATCGTCAAGCGCCGCAAATGTACCGGCCCACCGTGCAATTAACGGACACACACACAGCTGTTTGTTCGCCTGTTGAGTTGCAAATAAAGTGCGCACATCTGTGCTTCATTAGAATTCGGCAGCGTTTTCTTTCCCGTTCATTCAGCCGGCTCTTCGATGCAGCTCCGTCAGCATTATGATCACGCAATCGTTTCGTTTTTTTATTGCTTCACCTTCACTGCCGCCATTTAAACGCCAAAACCGCGTCGCGGGTCCACATAATTCATAAATTCTAGTAGCTTTCACTTCACAACTCTACCCACTATATATAAATATACCTCCTAAACAGTTCTGGCTCCTTCCTGGTATGCGCC…
GSR_IOB_NIMR_897	scaffold00738-scaffold01897-scaffold00089-scaffold09065	KB664508	AGAP003525;AGAP003525;AGAP003525;AGAP003525;	AGCAGAAGCTTTATCGAAAGTGGAAAGAGTTTCTCAACATTTTACGCGTCCAAAGTGTTACGTTTTTCGGCGAAAATACCTTGCAAATCTGGTGCAAACTGTTCGCAAAGGCGAAAAGCGGCAATATTTGTCGGCGACGACAGTTCAGCAGTGGCGGCAGCAGTGCATGATATCAACATAACAACTGGCACGACGCAAACCCTTCCCTGCCGGCAGTGTACCTTACACAAACACACACGAACACACACGCTCCACCGGATTGGATTCTGACTTGACGAGGTTGCTGTGTTTGTGAAAAGGTTTTTACCTGGACCCAGGGCAATCGAGAGCCACCGTACATTGCAAACAGAACGAGCCAACAGACGACAGCAGTGACCGAGTCCAGGCCGAGCTGGAAGG…
GSR_IOB_NIMR_898	scaffold00187-scaffold00092-scaffold05144-scaffold16582	KB665210	AGAP006366;AGAP006366;AGAP006366;AGAP006366;	AAGCGTACTATAGCCCCCCGTCTGTTGTGTTGTGTCCTTCACGAATCTGATCCAAATCGTCGTCCACCGACGCACCGTTTGTTCGGTACGGGTCACACGGAATCTTCCGTCGTTTAAACATTTGGACTAGTGCCTCTCTACAATCTCTCCCCCCAAGAGGTTAGGACAAAACAACGGTCAAAATGCATCGCGCAAGAACAGCACTCCACATGGTGAACCCGATGGGTCAGCAGAACTTCGGAGCATTTCTGCTGAAGAAACCGGCGTCGAAGCTGACCACCGAACTGGTTGCCGCTTCGTCCGTGAAGCTTTACAACTCCGCCGCAGCCGAACCGTTCCTGAATGGTTCCTCGTCAAACTACATCGACGATATGTACAATGCGTGGCTGCGGGATCCAG…
GSR_IOB_NIMR_899	scaffold02210-scaffold00055	KB664476	AGAP001382;AGAP001382;	GCTTTACATCATCATTGATACATTTCTATCAAAACTGGCATTAATTTATTTAAACACTACGTTCAACAATAGACAGAAGACAAAAAGCGGTCGTATTGCTCGAATTGATTGTGTTGTGAGGCTCATTTTTCTTTCGTCAGTTTTTTTTGTCCGTTACACTCCCGTATCGTATTGCACTTCTTCATTCATGATAACATGACAGAAATAGGTTGGCTCGCATCAGTGTGTTCGAAATTTACAGCATGATTCCCTCGAACCTTCGTTTCCTCCCGGGGCCACCGGCAAAGTTGGCGACCGCCATCGCCATTCGGTGTTTCGCTTCCTGTGCGCCTGAGTATCCACGCGATAGTCCAAAGTCTACCGTTCGTTTGGAGTTTTCTAGCTCATCTTTGGCACGTA…
GSR_IOB_NIMR_900	scaffold00094-scaffold00516-scaffold01700-scaffold00807	KB664810	AGAP008742;AGAP008742;AGAP008742;AGAP008742;	AAGGAAAACAAATTTTTTTACTATAGGAATGGAATAAATTAACATTTTTAAAACCAAAAATTGCATGCTTGGTACAACGTTGGACGTTACTGTACTCTCTTTCCTCTTCTACCACATTCTTTCGTTAGTTCGTCTATTCGTTCGTTTCATTGTATGAGTCGGCTTTACTTGCTATACTTCCATCTCATTTTTTGACGATAAAAGTACTACGGCAAACAAAACAGCTACGTGCGAGGTGATGACAGTGTTTGATTGTTTCGCTGAGAGTAATGTGGTCCTGTGTTTCTTCCATCAAGTTGTAAGGATGTtgtgtgtgtgtgtgtgtgtgtgtttgtgGGATATGTGTACAGGTGGTGTTGGTAGTGGTATTAAAGAGAAGCATTTGGTTTGTACCCAAGA…
GSR_IOB_NIMR_901	scaffold00973-scaffold22629-scaffold02771-scaffold09491	KB664525	AGAP005757;	ATTTTGGATTTTTGATTCCAAAGAATTATGTTAAAAAAATAGTAATAAAATGAAAATATTATACAAATAATCAATAAAGTTGATTCAACTGTTCTCATCGAATTGTTGAAAAATGTTTAATTTCCCTGCATGTTTACCTCAAAACTGTTTATTAAATGATTGTACTTAATCCAGTTAATTAATTCATTTCTTTATTTAGTTTTTTATTGATTTAAATTAAACTCTCACACTTCGTTTATGATTGCTCCCCACAGCTTGCAAGCCCCTGCCGAAAACGTGATTGCTCGCTCGGGTGGGGAGAAGAGAAAATGACGCCGGAACGCATACAAATGCAGTCCCGTTGGACGCCACCGTGGCGTCACCGTTAGAGCCACTCAACAACCTGATTCCATCGACACG…
GSR_IOB_NIMR_902	scaffold00017-scaffold20676	KB664644	AGAP001925;	AGACTTGATTATCATGCAATATTTGCTAAGAAAGAGCATTTAAATTTTAAAACGCCAGAAAGTATGCAATTATTTTGTTCGAAAAAGCAATTTACGTTAATAAAATGAAAACTCCCTACCAGTTTCTATTTCTTTATTTTGGGTACTTTTTTTTATCTCATTGTTCATTTATTCCTTTTTTATCGTGAAAACCCACAAGGTGAAATACCAACAAACAAACGAGGCGAACCATATGCATCCGTTCGCATACATAAACAGCGCCGTGCAACCGTCGTTTCGTTTCCGGTTTTCGATGGGAGGTCAGGTTCTTTGCTTCCCATCGCTTTCCACCTCTCTCACAATCGCCATACGAATGATTTATTCATTACGATCGAGCCTCCCAAAACGTGCGGTGCTATC…
GSR_IOB_NIMR_903	scaffold00927-scaffold00050-scaffold00071-scaffold00023	KB664782		aatagttaaacaagaaagaatgatctttcgtctcgttctaaggtaccccaaaatttgtatataagaaatcaacttattcaataaagaggacacaattcttaaccggcgaaccgaacacttcgtaagagtttcagtgttctttccaggcacgagatccgaaataatccttccctccggagaacggattcgacccctcagcggtgtctaccactccgacggaagctaggagagaagccagtgtccaggcgttggtcagcggaagattcgacctcgtcctccctacggaattcgggccggtgctctagtagtaccaactgctccgtcggaggaattggaagaatcgcgaccgcccctcccatcaggtccacttttggaagatcgcccggtaatccgggaatg…
GSR_IOB_NIMR_904	scaffold05410-scaffold00782-scaffold00009	KB664504	AGAP004963;	NNCTCGAAGTTTCGTTGTAGTACTTGAATCCTTCAAAATTGGGTGATGGGGCAGATAACAATGAGCGATCGCGTCATTTACTGGTTCTGGTACCAATGCCATGTGTCCCAATGTCTCGTACGATTTCATGAATTGACGGTACTGCTCATATATTACGGGGTTACGTTGCAGACGTCGTTCTGTATTGTAGAATCTGCGCTCAGCTATTTTTCTAGACTCACCGAGAGTTTCAGCAGGATCTGACGATTTAGGTAGCTTCACGATGAATCTGCCCTGTTCATTACGAACTGTTGTTGTCTTAAATAACTGCTCGCACGGATCATGATCTTCGGGATGCACACTTGAGGTAGGAACCGTATCCAGTTCCCAAAATCGTTGAACGCTTGCTTCTAACGTGTT…
GSR_IOB_NIMR_905	scaffold00775-scaffold00076-scaffold19954	KB665176	AGAP000562;AGAP000562	AGATTACGGACACGCCAAACGTCGTCCAGCAAACAAGCAGCAAGCACCCATCGATCAGTATTTCCCCGTTCAGGTTGACTATTACTATCGTGTTTTAGTAATCACCAGTGTGTGTGTGTGCGCTAGTGCCGTGTGAATAGTGTGACGACGCTTCGTCTTTGTTGCAGCAGTTCTAGTGGAAAAAGTGTTTCCCCATTTTCTCAGCGACGAAAATGGTTGCCAGCGGTAAAATGATGAACGTGCGCGTCACGACGATGGACGCGGAGCTGGAGTTCGCGATCCAGCAAGGCACCACAGGCAAGCAGCTGTTCGACCAGGTCGTGAAGACGATCGGCCTACGAGAGGTCTGGTTCTTTGGACTACAGTACACAGACTCGAAGGGCGATAACACGTGGATTA…
GSR_IOB_NIMR_906	scaffold00016-scaffold09480	KB665054	AGAP001448	ATGTTTTCGATGGATTCGTTCGACTTTGAGGCGGTTATGAGCCGCCATTTGTTCGAAGGGCCGACGGTGCATCAAAGTCAGCAACCGTTGCACCATCTGCAGCATCACTCCTGCCAGCAGCAGCATCAACAGCAGCACCAGCACCAGCAACATCATCAGCATCTGGACGATGAGCATCATCTGACGCATCATCGGCATCAGCATGATTTTCATCCGGACGCACACTCGCTCGATCATCAGCAGCAGCATCAGCTGCATCAGGCGAACAATGTCGATTCGACCACGTCGAACAGTTCGGACTTTTTCCTTGCCGACGATGAAAACACCACCGACAGTGATTCGTACTGCGGGTTTAACAGCGATCAGGAGAACAATGATTCCATGAAAGAGATCTACAGC…
GSR_IOB_NIMR_907	scaffold04644-scaffold00051-scaffold12237	KB664456	AGAP005313;	ATGTTAAATTTCAATCATTTATTCCATACTATATGTATATATTCTACCTGTCTAATCTCTTTGCCTTATACGACTGGTAAGTAAAATTTAACACAACGACGACGACTCTACCATTTAGCCATTtttgtttgtttgtttttttttcttcttccatttttcttgtttgtttgtttgcttgtatgctCAAGTATGCGTTTTGCGTTTTGCTTTTTTCGTGCCAGCTGTCTCTACTGCGTGAGAGGCTAGTTGCAAGGAATGTTGCAGAATAATTTTGATATTTGGTGTATTTGTATTTGTTTGTTTGCTTTATCTAAACGTTCTTAAATAGTACTCCTGCAAACTGTTTTTTTCTTCTTCTTTTTTCTCTCATGCTTTTTTGTTTACTATATAGTTTGCATT…
GSR_IOB_NIMR_908	scaffold00076-scaffold04611	KB665176	AGAP000005	CAAGAACCAACGGCAGTAGTAGCAGCAAAACTCTTCTTTTAAAAAGCAGAATATTATAGCGAAGCATAAAAGCAGAACAAAAACGCACCCATTGCGTGCGTGCGTGAGTGTGTGTGATTTATTCAAGTGTGCGCGTGCACATAACAAAAAAAAGCAAGTGGTGGTGGTGTTTCCGTGCCAAAGGGAAACACACACACACACAAAATAGTAACAACCAAAAACAAACATACAGTGAAACATAATATAAGTGGTGGTGGCGTGTGAAAATCCCCAAGAGACGGGCGACAGTAAGTgcagcagcagcagcagcagcaAAACCGTTTCTAACCACAATTATACAAATCACCTGATGCACCGCTGGCGCGGACATTGTTGTGCATCGTTTCGTCGCGTCATCAG…
GSR_IOB_NIMR_909	scaffold00029-scaffold00844	KB664429	AGAP009173	GCTTCGCAATGCCTGCCTTCCGTACGGCGGAACTGATCGCCTTGATCGCTGTCTGGATGCAGTTCAGCAGCTGGGACAGATCGCCGGTAGCATGTTTGTACTTTTTCTGCTCCTGCAGCACGAAACGCGTGAGCGTCATGCAGTTCGAGTCGAACGCTGGGCCTTGCTGGGTCATGTTTTGAGCGGAAGCTTTAAGCTCGTAGTAAAGTAACTATGATCACGATCAAGTGAAAGTGAATGCTTCTTTGGTGGATGCTGTACGATCCGGAACGAGAGTACTCCGGTGATAAAAACCAAACTCTTAGGCGGATCCGCGAAACACCGGGCACCACCACAACACCAACCGACGTAGAAGGCAGGCAAAGATCGAATGAACCGGCGGCGCATCGGGATGGCGCT…
GSR_IOB_NIMR_910	scaffold00076-scaffold09642-scaffold00847	KB665176	AGAP000009;AGAP000009;AGAP000005;	GTGGCCTTTGAAACTTTCACCAAAACCCTTAACTCATAGTTTTCCTCACGCTAAAACGAACAAGGAAGGAAAAACGGAGAGCTGTAACTCTATTCAGAAAGTCGAAGTGAAAACGAATAGAATAGGAGATCAATTTACCATTTTCTCGGGCGGTCTGCCGACGGAGAAGTGCAGTCCGAAGTCGCACTGCATCACCGTCATGGTGCAGGGCAAATCGACGACCGTCTTGGAGATGGAGCACAGCGTAGTTGACTTTGTGACCATGTGCGAGAGTCCGTACGGCAGCGACCTGCAAGAACCGTATGCCGTGGCAGTGCTGCTACAGAATGACCTCGTGCTGATCGATCTGCTGACGCCCGGTTATCCCACGTTCGAGTCGCCTTATTCGATGGACCTGCA…
GSR_IOB_NIMR_911	scaffold00900-scaffold00163	KB664748	AGAP000167;AGAP000167;	AATTCATATAACTACTTGAATCGTCAATTGGCCCAACAAACCCTCAACGAGCTGACTGTGCTGAAGACAACGCACCTTGATAATTGATCATTTATTCAAATGATTGGAAATTATCATTACGAAAACTACCAATTTAATACCATTGTTTGTAAAATCAATTCATATACTGATACTGATGTACATGTTATGCATAGCTTAAAATTAGTGTACGAGAAAAAAACAAAAGCATCTTAAATCACATTAGTTTTATTAACATGTTTTTTTATAAACAAAAAAATGATAGAAACAATGAAAACATAGTATACATGCATATGTCTACAAATACATATATCATCACATATAAACCTATAAAGACGCCAAGCGCACACGGTGGCATGTGCGCAGATAAAGCTTATTATC…
GSR_IOB_NIMR_912	scaffold00875-scaffold04346	KB664500	AGAP010690;AGAP010702;	AAACAACTTGCACGTGCATCGCTCGCTTCCTCTACTCGTGGTTGCATTGCTACGCGCTATGGTTGGAATAAAAAAGAACAAACGTAAGCTACCGGCACCGCAAATTAAACAGAAAAAAGCCCTGAACAAATGGAAGGAAGAAAAGAGCAGTAAGTTGGATGGTGCGAAAAAAACGGGGAAAGCTGGCAAAGCGAGCGATGAAAAGGCGAATAAAAAATCGGACCGCAAGCCGATCGTATTCGTGTCGCCCAAAGCGGACACCGCAGCAAATTCGGCGGATGGTGCAGACGAAATGGAAGTCACCGTACCGAAACAGCCCGTCCTGGAACCGGTCCCGACCGACATCCCCGATCCACAGCTGGACAAGCGCAAAATAAAGCTGCTCGAGCCACTGATCGG…
GSR_IOB_NIMR_913	scaffold02716-scaffold00080	KB664954	AGAP010961;AGAP010961;	TTTTTCATCAACCTGGTTTATTCCCACACTATTTCAAAACATCCTGGACAAGGTCGGCGTAAAGTCCTTCGTTGGAGTTCAGCGTGAAAGCGTTCTTGCGGTAGGTTAACCGTTCCGGCGTGGACGGCGATCGATCGATACGATAGTGGGAGAGCAGCTTCATGAGGGCTATCTTGATTTGCAACGTTCCGAAATGGGATCCGAGGCAGGTGCGTGGTCCAACGCCGAACGGCATGTACGTGCAGGGTTGTATTTGGTCCAGGTTCTCTTTCGCGAATCGTTCCGGATTGAACCGTTCCGGGTCGGGGAAATACTTCGGATCTCGATGGATTGCGTAGATGGGAATCAACACTGGCATGTGATTGGGGATAACGTAGTCGTGGAACGGTTCCAGCTTAT…
GSR_IOB_NIMR_914	scaffold00035-scaffold11821-scaffold04229	KB664491		GGTCATGTCCACACAGCGGTACATATTGGCATGGCTGTCACACACGCGAAAGTCAAAACATTCAGTGTCCAAACAAAACGATGGATACCGTAGAAACTAAGCCGCAAATCGCCAACATTCCAGAACCCAAAATCCAGCCAGTAGAAATCGAGATACTGCCTGTTGTGTACGACATCATCCGAAGTGTGGAAAAGGACCCGATAGATAACACCGCGAAACAAAAGGAAAGTGCCGAGTGCAGTCAGAAGGTCCTTGAACTTCAGCGGACACTTGAGACCGCCCGGGCAACCATCCGGAAGCTGCACGGTATCGAGTACAGCAAAGAGGAGCAACTGCGAAGACTCGAAAGCCTCCGGAAACAGCTGGCACTGAAGCAGCAGCTCATCAAGAAGTATAAAA…
GSR_IOB_NIMR_915	scaffold00074-scaffold11707	KB664999		GTTGTCATAAGCACTTTTATTCTTCATAATTTTTTGCAAATAGTACATCCATGTAAGTATGCAATGtgtgttgtattgtttggttttgttttgttttcttttCTTGTATTAATAATATTTGTTTAGTAAGTTTGGTAGCACGTGGTAGCGATTTTAGTGTGTGTTTTTGTCTGTGTGTATAATCTTGTTGCTGCTTATCCCATCGTTTGTCACTTTTTTAATATGCAGTGTGGGCCTGTTGCTCTTCTTAAAATATGTTCCATTCTATTTTCTAGTTCCTTCTAGGGCATTATTCCGCTCCACTGTGCCCAGGCAATGTTATATTATTTGCGGTTTTGTTTATGATTTTTTCTCTATCTGTCTCACTTTCTGCCTGCAATATTTGGCTGTTTTCTTCAC…
GSR_IOB_NIMR_916	scaffold22934-scaffold00028	KB664499	;AGAP010715;	TTGAGGCGCGCTAACTCCACGAACGCGAGGTGAACGCCGGTGGCAGTCTGATGGGCCAGGATGCGGAATCGGGCGGTAGCGCCAGCCGCCGGGGGACGGGCCGTGGACGGAACAACAGTGCGCTCAAGATGCTGCTGCGCATCTTCATGCAAGCGTTCACGATGACGTTCGTGGCGGAGTGGGGCGACCGGTCCCAGCTGACCACCGTCATCCTGAGTGCGCGCGAAAACGTGTACGGTGTGATCGCGGGCGGTATCATCGGACACTCGATCTGCACCGGACTGGCTGTGATCGGTGGGCGCATGGTTGCCCAGCGAATTTCCGTCCGAACTGTGACCCTCATCGGTGGTGTTGTGTTCCTGATCTTTGCCCTCAGCGCACTAGTCTTCGGTCCGGGCG…
GSR_IOB_NIMR_917	scaffold00055-scaffold05479	KB664551	AGAP001958;AGAP001958;	CAGTCGGTGAGAATCAGTACAAGTGCCTGTTGCCATAACGATCGAGAAGCAAAAGGAAAGCAAGAATTGGTCCAGACGTGTCTTTTTCGAAAAAATATATTTTATCGCCTGTGCAAACAAATACGCAGTTGCCGTGGTTCGATAAGGAGTCCGCTAGGCGGCGCGTGTAAAGAAAGTGCGTGCGTGCGTGAGTGCGTGAAAAAAAAATGACAATCAATAATATATTGTGGTTCCGCCATGGGCTTCGGTTACACGATAATCCGAGCCTGCTGGAAGCGCTCCGGAGCGATTGCATGAGCCAGTCCAGCGAGGCGGTGAAACTGTTCCCGATCTTCATATTCGATGGGGAAAGTGCTGGCACCCGCATCGTCGGGTACAACCGGATGAAGTTTCTGCTGG…
GSR_IOB_NIMR_918	scaffold14510-scaffold03830-scaffold09344-scaffold08112	KB664588		ACTCGGACTAAGTGCTGGGAGCCAAATGAAGAGTGCTTTTTGTTCGGTACACCCAATCTAATGGTGTTGGGTGCAAAGACTTTCCTAACCGGCTTTTTGTTCACGATTTCCTGGACTTGGCGAAATTCTCTATTGTTGTTCCATTTCATTCTGTGTTCCTCTTATATTCTCACTGCTCGCTCCCCTTCTCCCCTTATTGATCCAGCGATCGACACCATGTTTGTGCATGCTAAGACTGGTTCCAAAAGCCCAATAAAGTTTGTTGGAATTTTTTGTCGCTGTCACTTCGGTACGCATGATACCAATGTGCATAGCATCGATGAGCAACCGCTTCGAATGTTCGATGATTGCTGCTTAATTTCTTTTTGTCCAGGTAGAGCATAATGAGCAACGACAGAA…
GSR_IOB_NIMR_919	scaffold00051-scaffold02572	KB664456	AGAP005079;AGAP005314;	TAGGATTGTATCGTTTCTGTCGAGCGCTGCACATCACTAGCGGGAAGAGCGCAGAAAAAGCAGCAAAGAAAAAGTCTTTTCTTTTCACGGTAAAAGAAAACGGTGGCGATTTTGGCCTGCCTTCGCAAACTAAATCGAGCCGGAAAAGTGCATCCGGTCGAGCTGTCCGGGAAGCAGTTGCGTTCGCGAGTGCGTGTTGCTAGCGGAGCCTTCACGCCCCGAAGCTGTGCAGAAAACATATCCGCCGATCTGTCGAGGCCCAGCGAGACGACGACCGCGTCATCTTAATGGCCGATTGAGCAAAACCGTGCGCGTATTCTCCCGTGTGTGTCGAGAGCAGAGCCCTTTGCCGTGGTGTACGTGAATGCGTGCTTCCGGTACCATCTTTGTCCATCCGTC…
GSR_IOB_NIMR_920	scaffold00666-scaffold00004	KB664498	AGAP000038;	ACACACACACACACTCACACCCCGTCCTGCCCAAAGTGTCCGCCAGCGAAGCAAATACTCAGCGGCCATAATCCCCGAACCCCGGTTCCTGGCTTCAGCTTTAGCGCTCTAGTACATGAAGCAATTACTCTACAGACGTAGAGAACGTATCTGCCGAATGCGCTAAACAAGCCATGTACTAACGTTCCACAGCTGTAGCAACTGTCTGTATGGCCGGGCTTGTCTACACCGCAAAGGCTTTGTAGCTGGACGAAGATGCAGCTGCTCGGGCTCTAGTACGATTCACACCTATGACAGCCAACACGTGCCAATAGAGAAGGTGTGTGTGTGCACGCGCGTGTGTGTGCATGTTCAAGTGTGTGTGTGTGAGTTTGATACACAGTCGGAGCCTAATTGTTT…
GSR_IOB_NIMR_921	scaffold04644-scaffold00051-scaffold12237	KB664456		ATGTTAAATTTCAATCATTTATTCCATACTATATGTATATATTCTACCTGTCTAATCTCTTTGCCTTATACGACTGGTAAGTAAAATTTAACACAACGACGACGACTCTACCATTTAGCCATTtttgtttgtttgtttttttttcttcttccatttttcttgtttgtttgtttgcttgtatgctCAAGTATGCGTTTTGCGTTTTGCTTTTTTCGTGCCAGCTGTCTCTACTGCGTGAGAGGCTAGTTGCAAGGAATGTTGCAGAATAATTTTGATATTTGGTGTATTTGTATTTGTTTGTTTGCTTTATCTAAACGTTCTTAAATAGTACTCCTGCAAACTGTTTTTTTCTTCTTCTTTTTTCTCTCATGCTTTTTTGTTTACTATATAGTTTGCATT…
GSR_IOB_NIMR_922	scaffold00039-scaffold00449	KB664610		CCGGAATCTGTATCAGTTTGGTGCGGAATTTGAATTAATGGAGGTCATCTAGTGTTTTTCGGTGGCCGAGTAGCCGGTTCGTGAAGATGGTCTACGGATATATAACCCGGTGGGTCCTGCTACCTCAGTGCATTGTAGCATCGCAGAGCAAAGTGACAAGATCTTCCAACGTATTATCTGCAAAGTAGAGAGTAGTTCTTACTTTAATCAACGCTAGCAACAATGAAGTGCCTGGGTGACATCGAGGTGCGCAACCTGGACATCGACCATTCCGGTCTGGTGGACGGTTCGTACAGCTTCAGCTACGACCAGTCCGATGATCACAAGCGCGAAGAGTCGGCCGTGCTGAAGACGGTGAAGAACTTCGACAACGAGGATGTGCCAGCGCTGGCCATCACT…
GSR_IOB_NIMR_923	scaffold00105-scaffold01628	KB664453	AGAP010265;AGAP010266;	ATGGAGCCGATGGCATGCTTTTTAAGGATCGGATACTTTACACTCATTATAGAAGCATGGCACGATACAAACGAAACAACAACACGATCTCCAGGTACCCTAATTTCCCGCCTCTCGATCCAGCGCATATTGGGAGTTTCAACCGACTGGATGGAAGACAGTTACAACTCATCGCACACGATGATACGGTATGCGTTCCGGGTGACGTGCGATCCGAATTACTACGGTGCAGGCTGTTCCAATTTGTGCCGCAAGCGGGACGATCAATTTGGCCATTACACCTGCTCACCGATCGGTGAACGTGTTTGTCTGTCCGGCTGGCGGGGCGAATACTGTACCATTGCCCGATGCACTCCCGGATGCCTTCATGGACACTGTAACAAACCCAACGAATGCAAT…
GSR_IOB_NIMR_924	scaffold01406-scaffold00035	KB664755	AGAP004868;AGAP004868;	GCAAATCTCCCGATGGGCCGTTTTTCGGAAGCAAATCTTTCCGGCGGTGGACAGTATCATTTATCGACGTCTGAAGCTGCCTGTCTCCTGTTTGCACGCACCGCAGTTTGCTATTTTTACTCGGAATTTCGATGCATGCGTTACGTTACGCCTATACGTAATATATAACTGCGGAAGATGGGCACGTGCGTGTGTTTACATTGTCGGTTTTATATTTAACATTTTTTCCAGCTGCTTTCATTGGAGCCTAATGCAGTTTTAATTCGTACCATAAAGAAAAAGGTGGCAGAAACGTTCGCAGAAAGATAACAAAATTATTTGTACCACTCCGTGGGTTTGCTATTGTCAGCAGCTCACTGGCAACGGCATCGAACCAACCTGGCAATCACTTGTTTGACG…
[truncated: 161 more rows]

## Sheet: SDA-500
Supplemental Table S3.2 - Summary of transcript-based identification of genome assembly errors in SDA-500
[truncated: 342 more rows]
