# Supplementary material for: Integrating transcriptomic and proteomic data for accurate assembly and annotation of genomes
Source: HighWire-hosted journal article supplement (doi:10.1101/gr.201368.115), 2016-11-15
Supplement: Supplemental_Table_S4.xlsx [file Supplemental_Table_S4.xlsx]

## Sheet: Unannotated_mitochondrial_genes
Supplemental Table S4.1 - Unannotated genes in mitochondrial genome
Prasad et al., 2016. Integrating transcriptomic and proteomic data for accurate assembly and annotation of genomes
Gene name	Gene coordinates	Transcript evidence	Peptide evidence	Peptide	Indian strain coordinates	Modifications	Charge	m/z [Da]	MH+ [Da]	Delta M (ppm)	Spectrum File	Mascot Score	Sequest Score	No. PSMs	All PSM files	Tissues
IOB_NIMR_ND1	mitocondorial:+:2391-3294	Yes	Yes	KVLGYIQIR	mitocondorial:+:2484-2510		2	545.34167	1089.67607	-1.71	An_Stephensi_Salgland_bRPLC_1.raw	59.0	3.37	7	An_steph_Testis_bRP_23.raw:9685;An_steph_legs1.raw:1695;An_Steph_Proboscis_IG_01.raw:3147;An_Steph_Proboscis_IG_02.raw:2381;An_Stephensi_Salgland_bRPLC_1.raw:7957;Asteph_larvae_IG_5.raw:2644;An_Stephensi_Salgland_bRPLC_7.raw:7713	Testis; Legs; Proboscis; Salivary gland; Larvae
				kVLGYIQIR	mitocondorial:+:2484-2510	N-Term(iTRAQ4plex); K1(iTRAQ4plex)	3	459.96603	1377.88355	1.08	Astef_itraq_17.raw	48.0	-	1	Astef_itraq_17.raw:3252	Midgut
				VLGYIQIR	mitocondorial:+:2487-2510		2	481.29590	961.58452	1.62	An_Steph_Proboscis_IG_20.raw	48.0	1.87	3	An_Steph_Proboscis_IG_20.raw:4060;An_steph_Testis_bRP_15.raw:16854;Anstephensi_MG_6.raw:11790	Proboscis; Testis; Midgut
				GPNKVGFNGLLQPFSDAVK	mitocondorial:+:2514-2570		3	663.35730	1988.05735	-1.38	Asteph_larvae_IG_2.raw	43.0	4.1	4	Asteph_larvae_IG_2.raw:4938;Asteph_larvae_IG_3.raw:4688;Asteph_larvae_IG_4.raw:4585;Asteph_larvae_IG_5.raw:4837	Larvae
				vGFNGLLQPFSDAVk	mitocondorial:+:2526-2570	N-Term(iTRAQ4plex); K15(iTRAQ4plex)	2	940.52802	1880.04875	-1.77	Ansteph_4tissue_TRAQ_14.raw	85.0	4.42	6	Ansteph_4tissue_TRAQ_14.raw:4342;Astef_itraq_9.raw:8186;Astef_itraq_9.raw:8174;Astef_itraq_8.raw:8178;Astef_itraq_8.raw:8267;Astef_itraq_8.raw:8163	Ovary; Malpighian tubules; Midgut; Fatbody
				VGFNGLLQPFSDAVK	mitocondorial:+:2526-2570		2	796.42957	1591.85185	2.45	Ano_ste_testis_6.raw	88.0	5.41	172	An_steph_thorax1.raw:6547;An_steph_thorax1.raw:6495;An_steph_thorax2.raw:6077;An_steph_thorax3.raw:5910;An_steph_thorax8.raw:6071;An_steph_thorax5.raw:5972;An_steph_thorax25.raw:5904;An_steph_thorax3.raw:5956;An_steph_thorax8.raw:6119;Core_QE_An.Ste_Brain_bRP3.raw:17072;Ano_ste_brain_4.raw:5608;Ano_ste_brain_2.raw:6108;Ano_ste_brain_1.raw:6568;Ano_ste_brain_2.raw:6073;Ano_ste_brain_5.raw:5636;Ana…	Thorax; Brain; Malpighian tubules; Salivary gland; Testis; Antennae; Whole mosquito; Fatbody; Head; Haemolymph; Larvae; Legs; Male accessory glands; Maxillary palps; Midgut; Ovary; Proboscis; Pupae
				VGFNGLLQPFSDAVKLFTK	mitocondorial:+:2526-2582		3	694.38715	2081.14688	1.82	Ano_ste_brain_1.raw	-	3.81	1	Ano_ste_brain_1.raw:8910	Brain
IOB_NIMR_CYTB	mitocondorial:-:3421-4553	Yes	Yes	IPFHPYFIYK	mitocondorial:-:3871-3900		3	442.24054	1324.70707	-1.37	An_steph_Testis_bRP_7.raw	39.0	3.76	5	An_steph_Testis_bRP_7.raw:11181;An_steph_Testis_bRP_6.raw:12509;An_steph_thorax3.raw:3098;Core_QE_An.Ste_Brain_bRP4.raw:14975;JHU_Core_A.stephensi_Ovary_bRPLC_2.raw:5807	Testis; Thorax; Brain; Ovary
				iPFHPYFIYk	mitocondorial:-:3871-3900	N-Term(iTRAQ4plex); K10(iTRAQ4plex)	3	538.30902	1612.91251	-0.31	Astef_itraq_15.raw	35.0	4.76	2	Astef_itraq_15.raw:5958;Ansteph_4tissue_TRAQ_20.raw:3502	Midgut; Ovary; Malpighian tubules; Fatbody
IOB_NIMR_ND6	mitocondorial:-:4556-5077	Yes	No	-	-	-	-	-	-	-	-	-	-	-	-
IOB_NIMR_ND4L	mitocondorial:-:5170-5511	Yes	No	-	-	-	-	-	-	-	-	-	-	-	-
IOB_NIMR_ND4L	mitocondorial:-:5563-6846	Yes	No	-	-	-	-	-	-	-	-	-	-	-	-
IOB_NIMR_ND5	mitocondorial:+:6919-8656	Yes	No	LAFFHLLTHALFK	mitocondorial:+:7807-7845		3	519.97278	1557.90378	6.22	An_steph_legs1.raw	50.0	5.98	1	An_steph_legs1.raw:5415	Legs
				NYSLYLQEFQK	mitocondorial:+:8549-8581		2	716.86206	1432.71684	4.27	A_stephensi_Fatbody_bRP_22.raw	60.0	3.7	19	An_steph_Testis_bRP_24.raw:10952;An_steph_Testis_bRP_17.raw:14247;An_steph_Testis_bRP_16.raw:16472;An_steph_Testis_bRP_1.raw:13543;An_steph_Testis_bRP_2.raw:13401;An_steph_Testis_bRP_5.raw:13928;An_steph_Testis_bRP_4.raw:14229;An_steph_Testis_bRP_19.raw:17513;An_steph_Testis_bRP_6.raw:12443;An_steph_Testis_bRP_3.raw:15499;An_steph_Testis_bRP_14.raw:19852;A_stephensi_Fatbody_bRP_22.raw:11873;A_ste…	Testis; Fatbody; Larvae; Malpighian tubules; Pupae; Salivary gland; Ovary
				nYSLYLQEFQk	mitocondorial:+:8549-8581	N-Term(iTRAQ4plex); K11(iTRAQ4plex)	2	860.96136	1720.91545	0.35	Ansteph_4tissue_TRAQ_15.raw	71.0	5.43	3	Ansteph_4tissue_TRAQ_15.raw:3067;Astef_itraq_9.raw:6144;Astef_itraq_9.raw:6145	Ovary; Malpighian tubules; Midgut; Fatbody
IOB_NIMR_ND3	mitocondorial:-:9065-9412	Yes	No	-	-	-	-	-	-	-	-	-	-	-	-
IOB_NIMR_COX3	mitocondorial:-:9493-10266	Yes	yES	HINYHFSK	mitocondorial:-:9577-9600		3	349.17767	1045.51847	-2.81	An_steph_Testis_bRP_15.raw	39.0	3.45	3	An_steph_Testis_bRP_15.raw:6382;An_steph_Testis_bRP_17.raw:4892;An_steph_Testis_bRP_18.raw:4858	Testis
				EGTFQGLHTFPVTIGLR	mitocondorial:-:10024-10074		2	936.99982	1872.99236	-2.34	An_Stephensi_Salgland_bRPLC_3.raw	108.0	6.7	82	An_steph_thorax2.raw:4756;An_steph_thorax2.raw:4821;An_steph_thorax2.raw:4785;An_steph_thorax3.raw:4646;An_steph_thorax8.raw:4838;An_steph_thorax3.raw:4661;An_steph_thorax8.raw:4832;Core_QE_An.Ste_Brain_bRP1.raw:16685;Anaste_OG_8.raw:4516;An_steph_Testis_bRP_17.raw:15829;An_steph_Testis_bRP_18.raw:15264;An_steph_Testis_bRP_17.raw:15837;An_steph_Testis_bRP_18.raw:15255;An_steph_Testis_bRP_19.raw:1…	Thorax; Brain; Salivary gland; Testis; Fatbody; Head; Larvae; Legs; Male accessory glands; Malpighian tubules; Maxillary palps; Midgut; Ovary; Proboscis
				eGTFQGLHTFPVTIGLR	mitocondorial:-:10024-10074	N-Term(iTRAQ4plex)	2	1009.04956	2017.09184	-3.45	Ansteph_4tissue_TRAQ_17.raw	83.0	7.18	10	Ansteph_4tissue_TRAQ_17.raw:3400;Ansteph_4tissue_TRAQ_17.raw:3386;Ansteph_4tissue_TRAQ_17.raw:3492;Astef_itraq_10.raw:6924;Astef_itraq_10.raw:6902;Astef_itraq_10.raw:6991;Astef_itraq_11.raw:6907;Astef_itraq_11.raw:6814;Astef_itraq_11.raw:6803;Ansteph_4tissue_TRAQ_17.raw:3427	Ovary; Malpighian tubules; Midgut; Fatbody
IOB_NIMR_ATP6	mitocondorial:-:10269-10946	Yes	No	-	-	-	-	-	-	-	-	-	-	-	-	-
IOB_NIMR_ATP8	mitocondorial:-:10946-11101	Yes	No	tSQSLNIk	mitocondorial:-:10967-10990	N-Term(iTRAQ4plex); K8(iTRAQ4plex)	2	589.85291	1178.69853	0.18	Astef_itraq_12_110706015821.raw	67.0	-	1	Astef_itraq_12_110706015821.raw:1279	Midgut
IOB_NIMR_COX2	mitocondorial:-:11252-11935	yes	No	-	-	-	-	-	-	-	-	-	-	-	-	-
IOB_NIMR_COX1	mitocondorial:-:12004-13539	Yes	Yes	SPGITLDR	mitocondorial:-:13006-13029		2	429.73764	858.46800	0.00	An_Steph_Antennae_IG_01.raw	65.0	2.47	2	An_Steph_Antennae_IG_01.raw:2692;An_steph_Testis_bRP_10_r.raw:9867	Antennae; Testis
IOB_NIMR_ND2	mitocondorial:-:13738-14998	Yes	Yes	NLLTSESSLK	mitocondorial:-:14822-14851		2	546.30109	1091.59490	0.53	Asteph_larvae_IG_5.raw	74.0	2.18	5	Asteph_FatBody_IG_02.raw:1992;Asteph_FatBody_IG_01.raw:2357;Asteph_larvae_IG_5.raw:2389;JHU_core_MAG_bRPLC_5.raw:4706;An_Stephensi_Salgland_bRPLC_4.raw:6914	Fatbody; Larvae; Male accessory glands; Salivary gland

## Sheet: Nucleotide_Insertion_Mito_genom
Supplemental Table S4.2 - Insertion of nucleotides in mitochondrial genome based on RNA-Seq data and its effect on coding regions
Prasad et al., 2016. Integrating transcriptomic and proteomic data for accurate assembly and annotation of genomes
Gene name	Scaffold	Transcript Id	Insertion/deletion of	Insertion/deletion at	Effect on coding region
ND1	Mitochondrial	TCONS_00000001	Insertion of TA	mitochondrial:2,715-2,716	Continous frame of translation
			Insertion of TT	mitochondrial:3,288-3,289
CYTB	Mitochondrial	TCONS_00000001	Insertion of A	mitochondrial:4,278-4,279	Continous frame of translation
ND4	Mitochondrial	TCONS_00000005	Insertion of T	mitochondrial:5,653-5,654	Continuous frame of translation
			Deletion of C	mitochondrial:5,878
