# Supplementary material for: Integrating transcriptomic and proteomic data for accurate assembly and annotation of genomes
Source: HighWire-hosted journal article supplement (doi:10.1101/gr.201368.115), 2016-11-15
Supplement: Supplemental_Table_S5.xlsx [file Supplemental_Table_S5.xlsx]

## Sheet: Table S5.1_Novel genes
Supplemental Table S5.1 - A summary of results from proteogenomics analysis
Novel genes
Prasad et al., 2016. Integrating transcriptomic and proteomic data for accurate assembly and annotation of genomes
Tentative Designation	Gene coordinates	Peptide sequence	Genomic coordinates of identified peptide (Indian strain)	Transcript evidence (Yes/No)	Category (according to SDA500)	Gene involved (in SDA500)	Genomic coordinates in SDA500	Mascot Score	Sequest Score	MH+1	Delta M (ppm)	m/z [Da]	Charge	Modifications	no. PSMs	Tissues
IOB_NIMR_0001	scaffold00013:703078-703967	KDGHLTNSGKPQINR	scaffold00013:+:703198-703242	Yes	protein extension	ASTE006849	-	58	4.61	1664.89	3.34	416.978	4		2	Testis
		DGHLTNSGKPQINR	scaffold00013:+:703201-703242				-	57	4.81	1536.79	-0.18	512.934	3		3	Testis
		RIVLLDGcNLSHTSTR	scaffold00013:+:703381-703428				-	78	6.35	1841.96	-2.35	614.658	3	C8(Carbamidomethyl)	2	Testis
		IVLLDGcNLSHTSTR	scaffold00013:+:703384-703428				-	116	5.3	1685.86	-2.28	843.434	2	C7(Carbamidomethyl)	18	Testis
		AIQHFVDR	scaffold00013:+:703462-703485				-	59	2.72	985.52	-1.63	493.264	2		6	Testis
		KNYIVPTPcK	scaffold00013:+:703573-703602				-	78	4.35	1219.66	4.04	610.331	2	C9(Carbamidomethyl)	6	Testis
		NYIVPTPcK	scaffold00013:+:703576-703602				-	-	2.56	1091.56	2.16	546.283	2	C8(Carbamidomethyl)	1	Testis
		NYIVPTPcKEYPNPK	scaffold00013:+:703576-703620				-	61	3.6	1819.9	-0.98	910.455	2	C8(Carbamidomethyl)	1	Testis
		SQVYDDR	scaffold00013:+:703621-703641				-	55	1.94	882.4	5.79	441.704	2		5	Testis
		ILmAIAAK	scaffold00013:+:703642-703665				-	70	-	846.509	-2.85	423.758	2	M3(Oxidation)	3	Testis
		YDcAIISNDR	scaffold00013:+:703666-703695				-	68	3.29	1226.55	-1.2	613.776	2	C3(Carbamidomethyl)	6	Testis; Male accessory glands
		FRDVASEHPDWAQVAAGQcITFEWDSGENLR	scaffold00013:+:703696-703788				-	45	4.77	3591.65	4.39	898.668	4	C19(Carbamidomethyl)	2	Testis
		DVASEHPDWAQVAAGQcITFEWDSGENLR	scaffold00013:+:703702-703788				-	107	5.13	3288.47	2.29	1096.83	3	C17(Carbamidomethyl)	2	Testis
IOB_NIMR_0002	scaffold00014:1654733-1655410	SYSLVEPDGTLR	scaffold00014:+:1655093-1655128	Yes	novel gene		-	58	2.98	1336.67	0.27	668.841	2		3	Malpighian tubules
		tVFYTADPVNGFNAVVQR	scaffold00014:+:1655129-1655182				-	134	5.56	1998.01	-1.37	999.506	2		42	Malpighian tubules; Salivary gland; Testis; Brain; Fatbody; Midgut; Ovary
		TVFYTADPVNGFNAVVQR	scaffold00014:+:1655129-1655182				-	134	5.56	1998.01	-1.37	999.506	2		42	Malpighian tubules; Salivary gland; Testis; Brain; Fatbody; Midgut; Ovary
		TVFYTADPVNGFNAVVQRGPLVPK	scaffold00014:+:1655129-1655200				-	42	5.16	2589.38	-1.07	863.798	3		3	Malpighian tubules
		aVVPVAAGPAVFAPAPVAR	scaffold00014:+:1655201-1655257				-	101	6.87	1904.12	0.14	952.566	2	N-Term(iTRAQ4plex)	7	Ovary; Malpighian tubules; Midgut; Fatbody
		AVVPVAAGPAVFAPAPVAR	scaffold00014:+:1655201-1655257				-	101	6.87	1904.12	0.14	952.566	2	N-Term(iTRAQ4plex)	7	Ovary; Malpighian tubules; Midgut; Fatbody
IOB_NIMR_0003	scaffold00017:1304215-1307291	TPWcEcESKPADNPAK	scaffold00017:-:1306135-1306182	Yes	novel gene	novel gene	-	24	3.04	1889.82	2.34	630.612	3	C4(Carbamidomethyl); C6(Carbamidomethyl)	1	Testis
		IHFPLQSEVETYK	scaffold00017:-:1305024-1305062				KB664555:+:26895-26933	61	2.11	1590.81	-0.81	795.911	2		1	Salivary gland
		sLFIFDEVEk	scaffold00017:-:1304873-1304902				KB664555:+:27055-27084	76	3.96	1514.84	1.37	757.922	2	N-Term(iTRAQ4plex); K10(iTRAQ4plex)	1	Midgut
		SLFIFDEVEK	scaffold00017:-:1304873-1304902				KB664555:+:27055-27084	76	3.96	1514.84	1.37	757.922	2	N-Term(iTRAQ4plex); K10(iTRAQ4plex)	1	Midgut
		SELIESHVVDHFVPFLPLELR	scaffold00017:-:1304573-1304635				KB664555:+:27322-27384	75	6.96	2476.32	-0.71	826.112	3		9	Antennae; Legs; Male accessory glands; Midgut; Ovary; Salivary gland
IOB_NIMR_0004	scaffold00029:592909-594480	KPFQFIDELR	scaffold00029:+:593344-593373	Yes	Annotated	ASTE003039	-	-	4.06	1292.7	-1.74	646.852	2		1	Testis
		HQIPGTGAQGVESVTK	scaffold00029:+:593518-593565				-	66	3.97	1608.85	10.59	804.929	2		2	Testis
		YPTPPNIPIR	scaffold00029:+:594391-594420				-	57	2.65	1167.65	-3.84	584.327	2		4	Testis
IOB_NIMR_0005	scaffold00043:459438-460331	SFETTYSQDYTHR	scaffold00043:+:459511-459549	Yes	novel gene	-	-	97	4.79	1634.71	1.65	817.859	2		18	Testis; Male accessory glands
		IDANLPGScFSPPFEcTVPVVVGEK	scaffold00043:+:459583-459657				-	63	3.21	2719.3	-2.66	1360.16	2	C9(Carbamidomethyl); C16(Carbamidomethyl)	3	Testis
		HIDFESEVK	scaffold00043:+:459667-459693				-	60	4.27	1103.54	2.41	552.273	2		16	Testis
		HIDFESEVKR	scaffold00043:+:459667-459696				-	69	4.95	1259.64	-0.73	630.322	2		5	Testis
		HGcVYAISSIPK	scaffold00043:+:460039-460074				-	65	4.5	1331.68	-0.38	666.342	2	C3(Carbamidomethyl)	9	Testis; Male accessory glands
		SYIISSHWPDR	scaffold00043:+:460075-460107				-	67	3.06	1360.67	3.33	680.838	2		1	Testis
IOB_NIMR_0006	scaffold00019:1325274-1327040	IAIPDEIAPSHDSDAIR	scaffold00019:+:1325448-1325498	Yes	Annotated	ASTE004266	-	100	5.42	1819.92	-1.92	607.31	3		10	Testis; Male accessory glands
		QTAAAGVSPDEVDFIKFECR	scaffold00019:+:1325580-1325639				-	38	-	2240.07	1.26	747.361	3	C19(Carbamidomethyl)	1	Testis
		QTAAAGVSPDEVDFIK	scaffold00019:+:1325580-1325627				-	86	5.32	1647.83	1.72	824.416	2		5	Testis
		GQIHEHILQIGGDVAHR	scaffold00019:+:1325499-1325549				-	50	5.55	1879.99	2.49	470.754	4		3	Testis
		FITEYNQCLDTVEMTR	scaffold00019:+:1326073-1326120				-	124	4.16	2019.92	2.64	1010.46	2	C8(Carbamidomethyl)	2	Testis
		ESYDPVAEINDILGSK	scaffold00019:+:1326755-1326802				-	89	4.4	1749.86	1.44	875.432	2		4	Testis
IOB_NIMR_0007	scaffold00020:1226702-1231476			Yes	protein extension	ASTE005250
		GGTPTSAATTPPAK	scaffold00020:+:1228571-1228612				KB664522:-:1007795-1007836	86	3.77	1256.65	-0.82	628.827	2		11	Brain; Testis; Male accessory glands; Ovary; Salivary gland
		GGTPTSAATTPPAKR	scaffold00020:+:1228571-1228615				KB664522:-:1007792-1007836	71	3.72	1412.75	1.23	706.879	2		1	Salivary gland
		GGAAASSTPK	scaffold00020:+:1228622-1228651				KB664522:-:1007756-1007785	53	-	1134.64	-0.18	567.821	2	N-Term(iTRAQ4plex); K10(iTRAQ4plex)	1	Midgut
		EYTDNLKDSTTDENK	scaffold00020:+:1228763-1228807				KB664522:-:1007600-1007644	93	5.18	1772.78	1.1	886.896	2		1	Ovary
		DSTTDENKMDTTETEATAAATTTTTDVTETDAGK	scaffold00020:+:1228784-1228885				KB664522:-:1007522-1007623	91	4.67	3523.52	-0.09	1175.18	3		3	Ovary
		MDTTETEATAAATTTTTDVTETDAGK	scaffold00020:+:1228808-1228885				KB664522:-:1007522-1007599	75	5.13	2937.35	-5.33	979.787	3	N-Term(iTRAQ4plex); M1(Oxidation); K26(iTRAQ4plex)	1	Ovary; Malpighian tubules; Midgut; Fatbody
		KEDVAVVEEK	scaffold00020:+:1228976-1229005				KB664522:-:1007402-1007431	77	4.21	1145.61	0.32	573.306	2		2	Ovary
		EDVAVVEEKNEENTTVAK	scaffold00020:+:1228979-1229032				KB664522:-:1007375-1007428	59	4.72	2003.99	4.77	668.667	3		2	Testis; Ovary
		DTTTSSSSSTTADQTDASGVAK	scaffold00020:+:1229039-1229104				KB664522:-:1007303-1007368	116	3.53	2117.93	-1.18	1059.47	2		1	Ovary
		LNNSGTTDAQK	scaffold00020:+:1229132-1229164				KB664522:-:1007243-1007275	63	2.51	1148.56	3.29	574.783	2		2	Testis; Ovary
		VDEAMEVDVQK	scaffold00020:+:1229165-1229197				KB664522:-:1007210-1007242	85	5.42	1550.79	-3.91	775.899	2	N-Term(iTRAQ4plex); K11(iTRAQ4plex)	1	Ovary; Malpighian tubules; Midgut; Fatbody
		KEEAVETAASTVCESNGSDK	scaffold00020:+:1229318-1229377				KB664522:-:1007030-1007089	125	6.56	2111.94	-1.08	1056.47	2	C13(Carbamidomethyl)	3	Ovary
		KASEAPEAVVATEEAK	scaffold00020:+:1229405-1229452				KB664522:-:1006955-1007002	115	6.45	1629.83	-0.78	815.42	2		4	Male accessory glands; Ovary; Salivary gland
		IVASEEAPKIEPSPATTAQETDTVAASN	scaffold00020:+:1229764-1229847				KB664522:-:1006560-1006643	26	-	2827.39	3.48	943.136	3		1	Proboscis
IOB_NIMR_0008	scaffold00024:1726973-1727203	TVDYTADPINGFNAVVSK	scaffold00024:-:1727104-1727157	Yes	Annotated	ASTE005669	-	87	5.56	1910.97	9.9	955.988	2		9	Antennae; Fatbody; Legs; Maxillary palps
		TAPLVHAHAPVVK	scaffold00024:-:1727065-1727103				-	59	5.25	1339.79	0.59	670.396	2		7	Antennae; Fatbody
		HVVPAVK	scaffold00024:-:1727044-1727064				-	48	2.85	749.466	-1.34	375.237	2		3	Fatbody
		AVHHHVPAAPVVQK	scaffold00024:-:1727002-1727043				-	61	5.49	1489.84	-0.05	497.284	3		9	Testis; Antennae; Fatbody; Proboscis
IOB_NIMR_0009	scaffold00024:2125629-2130154	KQSNVSEDEAFQAQTQITAIADGFVK	scaffold00024:-:2127653-2127730	Yes	Annotated	ASTE010415	KB664433:+:1477284-1477361	77	4.39	2825.4	2.15	942.472	3		1	Testis
		IKDAQNQSIK	scaffold00024:-:2127740-2127769				KB664433:+:1477245-1477274	65	3.35	1144.63	2.25	572.821	2		2	Testis
		DYQLQELGQVVR	scaffold00024:-:2127977-2128012				KB664433:+:1477002-1477037	86	4.19	1447.76	2.9	724.383	2		14	Thorax; Brain; Testis; Male accessory glands; Malpighian tubules; Midgut; Ovary; Salivary gland
		iTYEGkDYQLQELGQVVR	scaffold00024:-:2127977-2128030				KB664433:+:1476984-1477037	34	5.01	2427.32	2.23	809.777	3	N-Term(iTRAQ4plex); K6(iTRAQ4plex)	1	Midgut
		sTTGSIETLR	scaffold00024:-:2128031-2128060				KB664433:+:1476954-1476983	-	2.87	1208.66	-0.01	604.834	2	N-Term(iTRAQ4plex)	1	Midgut
		SLAAMKDDYVK	scaffold00024:-:2128076-2128108				KB664433:+:1476906-1476938	69	3.81	1240.63	5.55	620.819	2		7	Testis; Fatbody; Malpighian tubules; Midgut; Ovary; Proboscis; Salivary gland
IOB_NIMR_0010	scaffold00024:1512938-1514042	EDEEAFEAGLSK	scaffold00024:+:1513094-1513129	No	Annotated	ASTE005648	-	57	2.33	1324.59	-2.96	662.797	2		4	Testis
		TVINHPAADEPPLEQPMQDK	scaffold00024:+:1513380-1513439				-	72	4.97	2230.08	-0.05	1115.54	2		4	Testis
		YAFMAEIER	scaffold00024:+:1513440-1513466				-	38	2.08	1129.53	-2.37	565.27	2		1	Testis
		EREQVAQGLR	scaffold00024:+:1513497-1513526				-	60	3.68	1185.63	-1.48	593.32	2		3	Testis
		RAEYEQAINMYSK	scaffold00024:+:1513551-1513589				-	84	2.8	1602.77	5.32	801.887	2		2	Testis
		DSPILYNNR	scaffold00024:+:1513608-1513634				-	41	2.13	1091.55	3.12	546.279	2		2	Testis
		AIIDcDFVLSK	scaffold00024:+:1513671-1513703				-	55	2.86	1280.65	-0.67	640.831	2	C5(Carbamidomethyl)	3	Testis
IOB_NIMR_0011	scaffold00025:1957530-1959099	ATVSQVAKDPWVID	scaffold00025:-:1958086-1958127	Yes	novel gene		-	-	4.23	1528.8	0.83	764.905	2		1	Testis
		KQYGYPSDMR	scaffold00025:-:1958188-1958217				-	64	3.94	1244.57	1.22	622.791	2		6	Testis
		QLVDAVQYMHEQGFcHR	scaffold00025:-:1958503-1958553				-	52	5.87	2118	18.84	706.673	3	C15(Carbamidomethyl)	1	Testis
		LESGPGHSLAcK	scaffold00025:-:1958779-1958814				-	86	4.79	1255.61	-2.31	628.307	2	C11(Carbamidomethyl)	5	Testis
		VYQAFYRPAR	scaffold00025:-:1958815-1958844				-	33	2.82	1270.67	2.37	635.84	2		3	Testis
IOB_NIMR_0012	scaffold00025:843859-845416	TPYITDGQLLHEAPINRE	scaffold00025:-:843999-844052	Yes	Annotated	ASTE007778	-	86	5.89	2067.07	7.07	1034.04	2		6	Testis
		RAHENYEVAK	scaffold00025:-:844206-844235				-	57	4.77	1216.61	3.27	406.209	3		1	Testis
		TDQENNISEETNPTIEASQQK	scaffold00025:-:844743-844805				-	117	7.04	2376.08	1.77	1188.55	2		9	Testis
		KPIENEKSPEEGSEAK	scaffold00025:-:844971-845018				-	85	5.68	1771.87	1.35	591.296	3		8	Testis
		NPEEKPGVK	scaffold00025:-:845082-845108				-	59	-	997.532	1	499.27	2		1	Testis
		QANSEKNPEEKPGVK	scaffold00025:-:845082-845126				-	51	4.78	1654.84	3.14	552.286	3		6	Testis
		DIKEQVQPENDSSNQDSEK	scaffold00025:-:845136-845192				-	95	4.29	2189.98	-0.37	1095.49	2		2	Testis
IOB_NIMR_0013	scaffold00025:1305694-1306962	LYETPDR	scaffold00025:+:1306225-1306245	No	Annotated	ASTE007754	KB665288:-:213069-213089	34	-	893.436	-0.92	447.221	2		1	Testis
		YVVEQSEAK	scaffold00025:+:1306402-1306428				KB665288:-:212886-212912	47	2.04	1052.53	-0.32	526.766	2		2	Salivary gland; Midgut
		QRDEEGDNELGEGALR	scaffold00025:+:1306555-1306602				KB665288:-:212712-212759	64	3.81	1787.82	3.03	894.414	2		1	Ovary
		DEEGDNELGEGALR	scaffold00025:+:1306561-1306602				KB665288:-:212712-212753	78	3.77	1503.66	-0.2	752.331	2		2	Midgut; Ovary
		KRPVQPLKPIIITR	scaffold00025:+:1306615-1306656				KB665288:-:212658-212699	-	5.37	1659.08	-1.65	415.525	4		2	Brain
		GYPSLPTMTVAEFYEQR	scaffold00025:+:1306687-1306737				KB665288:-:212577-212627	65	3.46	1988.95	3.68	994.978	2		3	Malpighian tubules; Ovary
		GYPSLPTmTVAEFYEQR	scaffold00025:+:1306687-1306737				KB665288:-:212577-212627	65	3.46	1988.95	3.68	994.978	2		3	Malpighian tubules; Ovary
		VAEGIFPDPEK	scaffold00025:+:1306738-1306770				KB665288:-:212544-212576	79	3.11	1201.61	1.25	601.309	2		3	Testis; Ovary
IOB_NIMR_0014	scaffold00028:1886709-1887680	SEcEccDSVSEEFYR	scaffold00028:-:1886784-1886828	No	Annotated	ASTE014838	-	101	4.48	1956.7	-2.13	978.854	2	C3(Carbamidomethyl); C5(Carbamidomethyl); C6(Carbamidomethyl)	8	Testis
		LHSTSTQTLQEAER	scaffold00028:-:1886853-1886894				-	89	4.75	1600.8	2.4	800.902	2		8	Testis
		SPQMLSEENDHSENNEIcATNYTPFEGK	scaffold00028:-:1887036-1887119				-	46	4.92	3241.33	-12.68	1081.11	3	C18(Carbamidomethyl)	3	Testis
		VNSDVIKPIEAK	scaffold00028:-:1887132-1887167				-	78	4.6	1312.75	1.08	656.878	2		19	Testis
		TGDVLGFGK	scaffold00028:-:1887183-1887209				-	64	3.39	893.471	-1.98	447.239	2		5	Testis
		ILSQAHATLLFK	scaffold00028:-:1887395-1887430				-	68	4.72	1341.79	0.48	671.398	2		6	Testis
		EEINILFDNR	scaffold00028:-:1887431-1887460				-	61	3.74	1262.64	0.11	631.823	2		5	Testis
IOB_NIMR_0015	scaffold00026:1131768-1132719	LYDPTGTYTIADLLHHR	scaffold00026:+:1131873-1131923	No	Annotated	ASTE003984	-	46	3.45	1986.02	3.85	497.259	4		1	Testis
		TNALQAAITIDEYYDWK	scaffold00026:+:1132369-1132419				-	85	3.12	2014.98	0.87	1007.99	2		1	Testis
		HWNELMQLHEQQAR	scaffold00026:+:1132522-1132563				-	69	4.86	1819.87	0.25	607.294	3		3	Testis
IOB_NIMR_0016	scaffold00034:416084-417845	SPQSVEVLSDPTPR	scaffold00034:+:416709-416750	No	Annotated	ASTE011746	-	38	2.84	1511.77	-2.35	756.387	2		1	Midgut
		VAIASNPPTSPPQPK	scaffold00034:+:417246-417290				-	48	3.8	1503.82	-0.69	752.411	2		1	Midgut
IOB_NIMR_0017	scaffold00022:2176624-2178040	VAEENVAPETPLGETEVSEQHR	scaffold00022:+:2177061-2177126	Yes	novel gene		-	82	4.95	2421.15	-0.04	807.722	3		2	Testis
		KVVILEEPSSIVK	scaffold00022:+:2177286-2177324				-	55	4.52	1440.87	0.48	720.938	2		1	Testis
IOB_NIMR_0018	scaffold00023:2838-5843	QLNYEAELK	scaffold00023:-:4142-4168	Yes	novel exon	ASTE001181	KB665176:-:1394766-1394792	47	2.5	1107.57	-0.83	554.287	2		1	Testis
IOB_NIMR_0019	scaffold00024:272948-273749	VAAEQAQLEQTDVEQEGNR	scaffold00024:+:273096-273152	Yes	novel gene		-	103	6.06	2115	3.09	1058	2		2	Testis
		HAIPQQSEDSPMPR	scaffold00024:+:273237-273278				-	56	2.76	1592.75	1.42	796.879	2		1	Testis
IOB_NIMR_0020	scaffold00007:1544975-1548875	EAVDAGKPAIETEK	scaffold00007:-:1548716-1548757	Yes	protein extension	ASTE000032	KB664921:-:451182-451223	64	3.94	1457.75	-1.73	729.377	2		1	Brain
		ITGPAGGLGSGGATGGGAGGGGQQK	scaffold00007:-:1547741-1547815				KB664921:-:450207-450281	156	6.73	1969.97	-0.59	985.487	2		6	Brain; Midgut; Ovary; Salivary gland
		YDDALPYENEDK	scaffold00007:-:1547873-1547908				KB664921:-:450339-450374	-	2.54	1471.62	-0.35	736.315	2		1	Ovary
		SSSPGFNSLYSSASEAK	scaffold00007:-:1547153-1547203				KB664921:-:449619-449669	38	-	1718.79	0.11	859.897	2		1	Brain
		FLEEQENSTGFGDR	scaffold00007:-:1547204-1547245				KB664921:-:449670-449711	103	3.84	1628.73	5.41	814.867	2		2	Testis; Ovary
IOB_NIMR_0021	scaffold00007:187617-191259	LLTPAEQEEQVSK	scaffold00007:-:189604-189642	Yes	Annotated	ASTE004551	KB664438:+:555402-555440	78	3.48	1471.78	10.97	736.394	2		1	Testis
		EEEITEKPPAATIPVDPSENVPQNHQR	scaffold00007:-:189928-190008				-	29	-	3025.49	1.76	757.128	4		1	Testis
		cITPINVTNNR	scaffold00007:-:190054-190086				KB664438:+:554958-554990	48	2.27	1301.66	-0.72	651.335	2	C1(Carbamidomethyl)	1	Testis
		KYEVGDYSK	scaffold00007:-:190180-190206				KB664438:+:554838-554864	63	3.37	1088.53	2.5	544.768	2		1	Testis
IOB_NIMR_0022	scaffold00007:472000-474704	LHPNLNDADETEQPHLTNIR	scaffold00007:+:473228-473287	Yes	Annotated	ASTE014514	-	106	6.37	2327.14	-0.13	1164.07	2		5	Testis
IOB_NIMR_0023	scaffold00008:1588859-1589038	cPLcQQEWSIQR	scaffold00008:-:1588868-1588903	No	Annotated	ASTE010235	-	90	2.59	1604.73	1.99	802.871	2	C1(Carbamidomethyl); C4(Carbamidomethyl)	1	Testis
IOB_NIMR_0024	scaffold00008:160179-161343	SEKNESEVLEQMALK	scaffold00008:-:160949-160993	Yes	protein extension	ASTE010703	KB664458:-:98468-98512	108	4.73	1734.86	0.37	867.933	2		2	Testis
		cDPVASPELR	scaffold00008:-:160609-160638				-	56	-	1143.55	-0.03	572.277	2	C1(Carbamidomethyl)	1	Testis
		RcDPVASPELR	scaffold00008:-:160609-160641				-	57	3.19	1299.65	2.94	650.329	2	C2(Carbamidomethyl)	1	Testis
IOB_NIMR_0025	scaffold00008:1588954-1622570	aDENENScDKFDDVKPDK	scaffold00008:-:1622360-1622413	Yes	novel gene		KB664655:+:102377-102430	69	-	2167.9	-5.86	723.303	3	N-Term(Acetyl); C8(Carbamidomethyl)	2	Midgut; Ovary
IOB_NIMR_0026	scaffold00008:813,687-814,706	ISQSALHEmLPAQ	scaffold00008:-:813687-813725	No	protein extension	ASTE010299	-	58	3.86	1440.72	4.1	720.864	2	M9(Oxidation)	1	Testis
		NESFAALVTESVK	scaffold00008:-:813729-813767				-	79	2.94	1394.72	1.83	697.863	2		4	Testis
IOB_NIMR_0027	scaffold00008:1852647-1858412	VYADVNSHKPR	scaffold00008:+:1852963-1852995	Yes	protein extension	ASTE009488	KB664400:+:79138-79170	83	4.67	1285.66	-0.16	643.336	2		55	Brain; Testis; Antennae; Fatbody; Head; Legs; Male accessory glands; Midgut; Ovary
		vYADVNSHkPR	scaffold00008:+:1852963-1852995				KB664400:+:79138-79170	83	4.67	1285.66	-0.16	643.336	2		55	Brain; Testis; Antennae; Fatbody; Head; Legs; Male accessory glands; Midgut; Ovary
		EYWDYENYIVDWVNQDDYQLVR	scaffold00008:+:1852996-1853061				KB664400:+:79171-79236	89	4.22	2925.31	4.19	1463.16	2		2	Testis; Midgut
		QLYQTLSDYDIR	scaffold00008:+:1853299-1853334				KB664400:+:79474-79509	98	3.48	1514.75	2.26	757.88	2		8	Brain; Testis; Male accessory glands; Malpighian tubules; Salivary gland
		DVKPHNVmIDHENR	scaffold00008:+:1853398-1853439				KB664400:+:79573-79614	67	5.5	1719.82	-0.52	860.415	2	M8(Oxidation)	20	Brain; Testis; Antennae; Fatbody; Male accessory glands; Midgut; Ovary; Salivary gland
		dVkPHNVmIDHENR	scaffold00008:+:1853398-1853439				KB664400:+:79573-79614	67	5.5	1719.82	-0.52	860.415	2	M8(Oxidation)	20	Brain; Testis; Antennae; Fatbody; Male accessory glands; Midgut; Ovary; Salivary gland
		DVKPHNVMIDHENR	scaffold00008:+:1853398-1853439				KB664400:+:79573-79614	67	5.5	1719.82	-0.52	860.415	2	M8(Oxidation)	20	Brain; Testis; Antennae; Fatbody; Male accessory glands; Midgut; Ovary; Salivary gland
		DVKPHNVmIDHENRK	scaffold00008:+:1853398-1853442				KB664400:+:79573-79617	57	7.58	1831.93	1.43	611.313	3		20	Brain; Testis; Antennae; Fatbody; Male accessory glands; Salivary gland
		DVKPHNVMIDHENRK	scaffold00008:+:1853398-1853442				KB664400:+:79573-79617	57	7.58	1831.93	1.43	611.313	3		20	Brain; Testis; Antennae; Fatbody; Male accessory glands; Salivary gland
		LIDWGLAEFYHPGQEYNVR	scaffold00008:+:1853449-1853505				KB664400:+:79624-79680	97	7.03	2307.13	3.73	1154.07	2		78	Thorax; Brain; Malpighian tubules; Antennae; Fatbody; Head; Legs; Male accessory glands; Maxillary palps; Midgut; Ovary; Proboscis; Pupae; Salivary gland; Testis
		ePFFHGHDNYDQLVR	scaffold00008:+:1853620-1853664				KB664400:+:79795-79839	38	5.56	2017.97	2.38	673.328	3	N-Term(iTRAQ4plex)	2	Midgut
		EPFFHGHDNYDQLVR	scaffold00008:+:1853620-1853664				KB664400:+:79795-79839	38	5.56	2017.97	2.38	673.328	3	N-Term(iTRAQ4plex)	2	Midgut
		VLGTEDLFAYLDK	scaffold00008:+:1853674-1853712				KB664400:+:79849-79887	114	3.94	1483.77	0.19	742.388	2		30	Brain; Testis; Antennae; Fatbody; Male accessory glands; Malpighian tubules; Maxillary palps; Midgut; Ovary; Salivary gland
		vLGTEDLFAYLDk	scaffold00008:+:1853674-1853712				KB664400:+:79849-79887	114	3.94	1483.77	0.19	742.388	2		30	Brain; Testis; Antennae; Fatbody; Male accessory glands; Malpighian tubules; Maxillary palps; Midgut; Ovary; Salivary gland
		FVHSENQHLVSPEGLDFLDK	scaffold00008:+:1853782-1853841				KB664400:+:79957-80016	49	8.63	2599.34	-1.05	867.117	3	N-Term(iTRAQ4plex); K20(iTRAQ4plex)	6	Ovary; Malpighian tubules; Midgut; Fatbody
		fVHSENQHLVSPEGLDFLDk	scaffold00008:+:1853782-1853841				KB664400:+:79957-80016	49	8.63	2599.34	-1.05	867.117	3	N-Term(iTRAQ4plex); K20(iTRAQ4plex)	6	Ovary; Malpighian tubules; Midgut; Fatbody
		EAMDHPYFAIIVNGQmPPPPTSTTK	scaffold00008:+:1853881-1853955				KB664400:+:80056-80130	68	5.56	2758.3	-6.17	920.106	3	M16(Oxidation)	1	Testis
IOB_NIMR_0028	scaffold00008:152189-158036	GYFGPWQK	scaffold00008:+:152793-152816	Yes	protein extension	ASTE010701	KB664458:+:90269-90292	40	1.22	982.478	-0.27	491.743	2		1	Salivary gland
		TGSTYNNPGFR	scaffold00008:+:155695-155727				KB664458:+:93171-93203	66	4.01	1213.56	-1.04	607.283	2		6	Salivary gland; Testis; Antennae; Fatbody; Ovary
		KPRPPNSTTDGLGIR	scaffold00008:+:155994-156038				KB664458:+:93470-93514	84	1.71	1608.88	-0.85	536.965	3		1	Salivary gland
IOB_NIMR_0029	scaffold00008:161738-162475	mPWSISVAQPK	scaffold00008:+:161795-161827	No	Annotated	ASTE010704	-	68	3.86	1259.64	-0.89	630.326	2	M1(Oxidation)	4	Testis
		QLLEQEQR	scaffold00008:+:162182-162205				-	-	2.11	1043.55	2.44	522.279	2		1	Testis
		TSNDGSDVQANTDRPIQSPSVPSAAEHDPEPLR	scaffold00008:+:162206-162304				-	64	6.43	3487.63	-1.47	1163.21	3		6	Testis
		TSNDGSDVQANTDRPIQSPSVPSAAEHDPEPLRR	scaffold00008:+:162206-162307				-	19	6.42	3643.72	-3.92	729.55	5		4	Testis
		GSSLSALATATDGTNcFQK	scaffold00008:+:162308-162364				-	109	4.61	1928.9	-0.39	964.954	2	C16(Carbamidomethyl)	5	Testis
IOB_NIMR_0030	scaffold00038:1241789-1247950	GDSIQTVFDSINGER	scaffold00038:-:1246775-1246819	Yes	Annotated	ASTE011610	KB664677:+:435054-435098	77	2.46	1637.78	3.97	819.395	2		1	Testis
		KIYNTVPYEQK	scaffold00038:-:1245492-1245524		Annotated		KB664677:+:436349-436381	-	3.3	1382.75	13.7	691.879	2		1	Testis
IOB_NIMR_0031	scaffold00038:1577076-1584958	AWTIVNQIDAVDNQLEQDASHQR	scaffold00038:+:1582196-1582264	Yes	Annotated	ASTE011581	KB664677:-:79990-80058	71	4.32	2651.29	3.44	884.435	3		1	Testis
		ELVDIYLR	scaffold00038:+:1582280-1582303				KB664677:-:79951-79974	31	-	1020.57	0.21	510.79	2		1	Brain
		FAETELTPGDEGDYR	scaffold00038:+:1582304-1582348				KB664677:-:79906-79950	137	4.34	1699.75	3.53	850.379	2		5	Testis; Male accessory glands; Maxillary palps; Proboscis; Salivary gland
		LLTIDLAETILFDK	scaffold00038:+:1582526-1582567				KB664677:-:79687-79728	69	3.19	1604.91	-0.71	802.96	2		2	Male accessory glands
		TQQLMQSVMR	scaffold00038:+:1583154-1583183				KB664677:-:79071-79100	48	2.85	1221.61	-0.95	611.307	2		1	Male accessory glands
		ESVSDIEQNR	scaffold00038:+:1583652-1583681				KB664677:-:78573-78602	73	3.19	1176.55	-0.77	588.778	2		8	Testis; Male accessory glands; Midgut; Ovary; Pupae; Salivary gland; Antennae
		YMDVPTLAPAR	scaffold00038:+:1584199-1584231				KB664677:-:78023-78055	77	2.26	1233.63	-2.07	617.317	2		1	Male accessory glands
		YmDVPTLAPAR	scaffold00038:+:1584199-1584231				KB664677:-:78023-78055	77	2.26	1233.63	-2.07	617.317	2		1	Male accessory glands
		STPDSTSGQYLR	scaffold00038:+:1584232-1584267				KB664677:-:77987-78022	53	2.75	1311.62	0.02	656.312	2		2	Testis; Midgut
		YGGFVAPK	scaffold00038:+:1584397-1584420				KB664677:-:77834-77857	55	1.98	838.446	-0.09	419.726	2		3	Male accessory glands; Midgut; Salivary gland
		VFTYDFGPHIQVPTK	scaffold00038:+:1584421-1584465				KB664677:-:77789-77833	49	4.56	1748.9	0.86	583.639	3		1	Proboscis
IOB_NIMR_0032	scaffold00039:1175497-1176908	QFGGVEGTASGFGR	scaffold00039:+:1176347-1176388	Yes	Annotated	ASTE004904	Gene has only one exon-	66	3.4	1369.65	-0.35	685.328	2		1	Larvae
IOB_NIMR_0033	scaffold00039:1178079-1179334	ISFTQSGVSVHPQYNPSTIR	scaffold00039:+:1178502-1178561	Yes	Annotated	ASTE004904	Gene has only one exon-	85	4.79	2218.12	-1.49	1109.56	2		5	Larvae
		TFAGLEGTASGFGR	scaffold00039:+:1178652-1178693				Gene has only one exon-	99	3.79	1370.67	0.35	685.839	2		3	Larvae
		TSDASTATSPVVmFTR	scaffold00039:+:1178694-1178741				-	-	2.44	1686.8	1.7	843.905	2	M13(Oxidation)	1	Larvae
		TSDASTATSPVVMFTR	scaffold00039:+:1178694-1178741				-	-	2.44	1686.8	1.7	843.905	2	M13(Oxidation)	1	Larvae
IOB_NIMR_0034		VVEVGPYVYFQYR	scaffold00039:+:1484536-1484564	Yes	Annotated	ASTE007042
			scaffold00039:+:1484640-1484649
		GTDGSGYPPFR	scaffold00039:+:1488573-1488605				KB664439:-:505057-505089	77	-	1153.53	1.87	577.268	2		1	Salivary gland
		MTIFSTDIcR	scaffold00039:+:1488621-1488650				KB664439:-:505012-505041	54	2.9	1243.59	3.51	622.296	2	C9(Carbamidomethyl)	1	Proboscis
IOB_NIMR_0035	scaffold00040:240992-241512	IYLNYDAMQSAK	scaffold00040:+:241212-241247	Yes	novel gene		-	69	3.09	1416.71	16.86	708.857	2		1	Testis
IOB_NIMR_0036	scaffold00041:1523590-1526930	DKDNSLQANIDFSDIR	scaffold00041:+:1525086-1525133	Yes	Annotated	ASTE002140	KB664493:+:504358-504405	82	3.44	1850.89	2.31	925.95	2		1	Testis
		ITVEGIAIEK	scaffold00041:+:1525273-1525302				KB664493:+:504545-504574	-	3.77	1072.63	0.81	536.817	2		2	Testis
		QAVPLGQAAPQGQK	scaffold00041:+:1526110-1526151				-	37	2.77	1392.76	3.67	696.886	2		1	Testis
IOB_NIMR_0037	scaffold00001:2459542-2460769	LLDIGSGDGR	scaffold00001:-:2460397-2460426	Yes	novel gene		KB664666:-:59454-59483	70	2.91	1002.52	-0.47	501.764	2		2	Midgut; Proboscis
		NVLSFVKPSAAGSK	scaffold00001:-:2460427-2460468				KB664666:-:59484-59525	44	-	1404.79	1.03	702.897	2		1	Midgut
		QISSAGPTFDGQGRPK	scaffold00001:-:2460682-2460729				KB664666:-:59739-59786	54	4.06	1645.84	4.85	823.422	2		3	Salivary gland; Midgut
IOB_NIMR_0038	scaffold00077:199424-200128	KSEFSEYLER	scaffold00077:+:199604-199633	No	novel gene		-	47	2.39	1287.62	1.73	644.316	2		1	Testis
		SLAVQTHDQDAGPSR	scaffold00077:+:199682-199726				-	90	4.42	1581.76	-0.69	791.384	2		6	Testis
		QGSLVEYR	scaffold00077:+:199784-199807				-	48	-	951.489	-0.22	476.248	2		1	Testis
		WLQDLEEANSK	scaffold00077:+:200000-200032				-	56	2.36	1332.64	-2.08	666.824	2		2	Testis
IOB_NIMR_0039	scaffold00085: 135232-137040	AQcHDQEIFDLR	scaffold00085:+:135481-135516	No	Annotated	ASTE008192	-	80	4.68	1531.7	1.1	766.352	2	C3(Carbamidomethyl)	1	Haemolymph
		NPFGVVEHTINEEFR	scaffold00085:+:136216-136260				-	80	4.95	1787.88	4.4	894.443	2		2	Haemolymph
IOB_NIMR_0040	scaffold00001:3940588-3941555	VHNVAAPVDSYAGK	scaffold00001:-:3940812-3940853	Yes	Annotated	ASTE003526	KB664666:-:1009775-1009816	88	4.64	1427.73	2.41	714.369	2		20	Brain; Salivary gland; Testis; Antennae; Midgut; Proboscis
IOB_NIMR_0041	scaffold00002:2435901-2441354	SGTITNNNSTVQR	scaffold00002:+:2437462-2437500	Yes	Annotated	ASTE000482	KB664580:-:167591-167629	73	2.78	1391.69	0.9	696.348	2		1	Testis
		NAATNAVAPVNDNADDGAEEVERR	scaffold00002:+:2440495-2440566				KB664580:-:164524-164595	50	5.31	2498.14	-2.49	833.386	3		1	Midgut
IOB_NIMR_0042	scaffold00002:3339528-3363349	TAQSTPAIAISTPATLK	scaffold00002:+:3353670-3353720	Yes	novel gene		KB664470:+:28994-29044	64	3.01	1670.93	-0.28	835.97	2		2	Ovary; Salivary gland
		IRPDLQYPTEPSNK	scaffold00002:+:3353955-3353996				KB664470:+:29279-29320	56	4.24	1657.86	3.5	829.434	2		3	Fatbody; Salivary gland
		GLQWTTVIER	scaffold00002:+:3354063-3354092				KB664470:+:29387-29416	52	2.54	1202.66	2.36	601.831	2		1	Salivary gland
		MFHVEGENER	scaffold00002:+:3354093-3354122				KB664470:+:29417-29446	29	2.77	1247.55	2.35	624.279	2		1	Testis
		KEWVDAIR	scaffold00002:+:3354123-3354146				KB664470:+:29447-29470	61	-	1016.55	0.72	508.78	2		1	Salivary gland
		KVTLENFEFLK	scaffold00002:+:3354309-3354314
			scaffold00002:+:3354383-3354412
		VTLENFEFLK	scaffold00002:+:3354312-3354314
			scaffold00002:+:3354383-3354412
		FYAAEIISALGYLHSHGIIYR	scaffold00002:+:3354799-3354830
			scaffold00002:+:3358421-3358451
		LENLLLDK	scaffold00002:+:3358461-3358484				KB664470:+:33769-33792	51	-	957.562	0.38	479.285	2		1	Salivary gland
		lENLLLDk	scaffold00002:+:3358461-3358484				KB664470:+:33769-33792	51	-	957.562	0.38	479.285	2		1	Salivary gland
		LENLLLDKDGHIK	scaffold00002:+:3358461-3358499				KB664470:+:33769-33807	32	1.99	1507.85	-0.71	503.287	3		1	Salivary gland
		lENLLLDkDGHIk	scaffold00002:+:3358461-3358499				KB664470:+:33769-33807	32	1.99	1507.85	-0.71	503.287	3		1	Salivary gland
IOB_NIMR_0043	scaffold00002:2433410-2443061	YNVAVTK	scaffold00002:-:2441486-2441506	Yes	Annotated	ASTE000483	KB664580:+:163584-163604	52	-	794.442	1.79	397.725	2		1	Testis
		LEVPGVYDR	scaffold00002:-:2441540-2441566				KB664580:+:163524-163550	60	2.07	1047.55	-0.06	524.277	2		2	Brain; Testis
		IHELQSELDNVR	scaffold00002:-:2441648-2441683				KB664580:+:163407-163442	52	2.34	1452.75	1.85	726.877	2		3	Brain; Testis
		IKAELSQDVGTSK	scaffold00002:-:2441690-2441728				KB664580:+:163362-163400	68	2.47	1375.75	3.58	688.378	2		1	Antennae
		YLIHLDSVNR	scaffold00002:-:2441897-2441926				KB664580:+:163164-163193	28	1.32	1229.66	0.5	410.56	3		1	Brain
		DLVQEYDRLK	scaffold00002:-:2441954-2441983				KB664580:+:163107-163136	11	-	1278.68	5.43	639.842	2		1	Brain
		QQELNIIEK	scaffold00002:-:2442329-2442355				KB664580:+:162735-162761	32	2.5	1114.61	-0.47	557.809	2		2	Midgut; Testis
		TALFEEISGSGLLK	scaffold00002:-:2442596-2442637				KB664580:+:162453-162494	77	1.96	1464.8	3.06	732.903	2		2	Testis; Salivary gland
		SVINASSEYR	scaffold00002:-:2442773-2442802				KB664580:+:162288-162317	60	2.7	1125.55	-0.97	563.28	2		2	Brain; Midgut
		IQSTNEEFEVAR	scaffold00002:-:2434245-2434280				KB664580:+:170811-170846	62	3.08	1422.69	0.14	711.847	2		4	Testis; Midgut
		AVQDDEDSLETYKQTEAR	scaffold00002:-:2434848-2434901				KB664580:+:170190-170243	48	4.12	2097.96	1.17	699.991	3		2	Midgut; Proboscis
		AVQDDEDSLETYK	scaffold00002:-:2434863-2434901				KB664580:+:170190-170228	65	3.58	1512.66	-7.9	756.833	2		3	Midgut; Ovary
		INNNLEFER	scaffold00002:-:2434941-2434967				KB664580:+:170124-170150	75	3.12	1148.57	1.8	574.789	2		1	Testis
		ELVLQQER	scaffold00002:-:2435007-2435030				KB664580:+:170061-170084	39	1.88	1014.56	-0.51	507.782	2		1	Brain
		SGIISGGSHDLAR	scaffold00002:-:2435430-2435468				KB664580:+:169623-169661	75	1.9	1269.66	1.78	635.332	2		2	Testis
		SGIISGGSHDLAR	scaffold00002:-:2435430-2435468				KB664580:+:169623-169661	75	1.9	1269.66	1.78	635.332	2		2	Testis
IOB_NIMR_0044	scaffold00002:5082811-5083347	AVTDEDLVR	scaffold00002:+:5083045-5083071	No	Annotated	ASTE000902	KB664899:-:1192794-1192820	-	2.31	1017.52	-0.01	509.264	2		1	Salivary gland
IOB_NIMR_0045	scaffold00002:5810754-5812154 (-)	SFPATSSPPTSR	scaffold00002:-:5811139-5811174	Yes	novel gene		-	-	2.95	1234.62	11.43	617.814	2		1	Testis
		VESVAQPNALIDR	scaffold00002:-:5811325-5811363				-	73	3.88	1411.75	-2.57	706.379	2		6	Testis
		FNNTPPDQK	scaffold00002:-:5811868-5811894				-	-	3.16	1060.51	-0.51	530.756	2		1	Testis
		NLIPSLEEPIDIKK	scaffold00002:-:5811916-5811957				-	57	4.16	1608.93	2.86	536.98	3		3	Testis
		NLIPSLEEPIDIK	scaffold00002:-:5811919-5811957				-	49	3.45	1480.83	1.43	740.918	2		3	Testis
IOB_NIMR_0046	scaffold00003:3535741-3536179	AATATITNPTTGVR	scaffold00003:-:3535935-3535976	Yes	novel gene		KB665376:+:26621-26662	64	-	1373.73	-4.57	687.37	2		3	Midgut; Proboscis
IOB_NIMR_0047	scaffold00003:3636208-3640633	QcFLTPVYVDFITK	scaffold00003:-:3636594-3636635	Yes	Annotated		KB664517:+:297459-297500	53	4.86	1730.88	0.41	865.945	2	C2(Carbamidomethyl)	11	Malpighian tubules; Head; Midgut; Ovary; Proboscis; Antennae
		qcFLTPVYVDFITk	scaffold00003:-:3636594-3636635				KB664517:+:297459-297500	53	4.86	1730.88	0.41	865.945	2	C2(Carbamidomethyl)	11	Malpighian tubules; Head; Midgut; Ovary; Proboscis; Antennae
		QLDLEESKIVFGK	scaffold00003:-:3637529-3637567				KB664517:+:296529-296567	-	3.81	1505.82	-1.03	753.413	2		1	Malpighian tubules
IOB_NIMR_0048	scaffold00003:5497602-5505362	cGPLDNSSPITKK	scaffold00003:-:5499613-5499651	Yes	Annotated	ASTE010150	KB664334:+:361348-361386	67	4.57	1416.72	-0.08	472.91	3	C1(Carbamidomethyl)	1	Midgut
		cGPLDNSSPITK	scaffold00003:-:5499616-5499651				KB664334:+:361348-361383	60	3.23	1288.62	0.23	644.814	2	C1(Carbamidomethyl)	3	Midgut
		LNDSLYLcVR	scaffold00003:-:5499652-5499681				KB664334:+:361318-361347	64	2.99	1252.64	-0.33	626.821	2	C8(Carbamidomethyl)	1	Midgut
		ALHEEPTPPVIQPGQGGK	scaffold00003:-:5500981-5501034				KB664334:+:359965-360018	97	4.99	1854.97	-0.29	927.989	2		14	Midgut
		ENVQIScGcFHDVK	scaffold00003:-:5501044-5501085				KB664334:+:359914-359955	51	3.92	1692.75	0.4	564.921	3	C7(Carbamidomethyl); C9(Carbamidomethyl)	4	Midgut
		TAVQcEQQEK	scaffold00003:-:5501086-5501115				KB664334:+:359884-359913	51	2.64	1220.56	-1.97	610.781	2	C5(Carbamidomethyl)	1	Midgut
		FDAQVDHDVNGVNYAK	scaffold00003:-:5501140-5501187				KB664334:+:359812-359859	89	6.39	1791.83	-0.25	896.418	2		4	Midgut
		GDRLEQFSGHHLTADAWSR	scaffold00003:-:5501302-5501358				KB664334:+:359641-359697	50	6.12	2183.04	-0.13	546.515	4		1	Midgut
		AYAGWVQEQYR	scaffold00003:-:5501743-5501775				KB664334:+:359224-359256	58	2.63	1370.65	-2.02	685.827	2		1	Midgut
		EAFWEAYQTQAK	scaffold00003:-:5502142-5502177				KB664334:+:358822-358857	-	2.34	1471.68	-0.61	736.346	2		2	Midgut
		FREAFWEAYQTQAK	scaffold00003:-:5502142-5502183				KB664334:+:358816-358857	46	-	1774.85	-1.12	592.289	3		1	Midgut
IOB_NIMR_0049	scaffold00062:814578-816252	LTWQSADSR	scaffold00062:-:815610-815636	Yes	protein extension	ASTE003639	-	57	2.29	1063.51	-2.27	532.261	2		6	Salivary gland; Testis; Maxillary palps; Ovary
		cPQIVIK	scaffold00062:-:815652-815672				-	32	2.83	857.492	1.15	429.25	2	C1(Carbamidomethyl)	2	Fatbody; Antennae
		nAANADLVPAEQANVk	scaffold00062:-:815673-815720				-	64	4.2	1913.03	-0.58	957.02	2	N-Term(iTRAQ4plex); K16(iTRAQ4plex)	1	Midgut
IOB_NIMR_0050	scaffold00064:870088-871849	ELPTGIDDcFYK	scaffold00064:+:870529-870564	Yes	novel exon	ASTE005126	-	68	3.4	1457.67	4.79	729.338	2	C9(Carbamidomethyl)	1	Testis
		TPVNQPAIIVK	scaffold00064:+:870917-870949				-	73	4.52	1179.72	5.28	590.362	2		6	Testis; Ovary; Salivary gland
		FVDFIPALK	scaffold00064:+:871085-871111				KB664877:-:549815-549841	61	1.85	1049.6	-0.21	525.305	2		3	Testis; Malpighian tubules
		IPFEccLTSNVK	scaffold00064:+:871333-871368				KB664877:-:549549-549584	59	3	1467.71	5.71	734.356	2	C5(Carbamidomethyl); C6(Carbamidomethyl)	1	Ovary
		TVPSYDDHHVAK	scaffold00064:+:871375-871410				-	-	2.25	1368.66	2.63	684.833	2		2	Testis; Midgut
		NAVEYTFATEQEK	scaffold00064:+:871602-871640				KB664877:-:549277-549315	62	3.43	1529.72	2.69	765.362	2		2	Testis
IOB_NIMR_0051	scaffold00065:884839-910949	ImALmDHVDEQFDIFELYPDIDR	scaffold00065:+:910142-910210	Yes	Annotated	ASTE007938	KB664461:-:84756-84824	45	2.85	2857.3	-0.64	953.106	3	M2(Oxidation); M5(Oxidation)	1	Male accessory glands
		LIHVLcSSHFSAR	scaffold00065:+:910319-910357				KB664461:-:84609-84647	64	5.61	1526.79	2.49	763.9	2	C6(Carbamidomethyl)	6	Thorax; Brain; Legs; Malpighian tubules; Midgut
		VDGEQVFEPEQPHVALR	scaffold00065:+:910415-910465				KB664461:-:84501-84551	88	6.72	1949.98	1.79	975.491	2		24	Brain; Testis; Antennae; Fatbody; Head; Legs; Midgut; Proboscis; Malpighian tubules
IOB_NIMR_0052	scaffold00065:629743-631284	cScGVAMEADGPENSSK	scaffold00065:+:630251-630301	Yes	novel gene		-	101	4.26	1798.7	-0.82	899.855	2	C1(Carbamidomethyl); C3(Carbamidomethyl)	1	Testis
		NNKPTLPIAVVPVEPHHEGAR	scaffold00065:+:630520-630582				-	58	5.39	2275.24	3.19	759.084	3		8	Testis
		STLPAPTSDSDR	scaffold00065:+:630604-630639				-	65	2.46	1246.59	1.62	623.8	2		3	Testis
		SVVPEFDELVATVHGLVER	scaffold00065:+:630667-630723				-	89	4.54	2096.1	0	1048.55	2		4	Testis
IOB_NIMR_0053	scaffold00067:272173-275412			Yes	protein extension	ASTE008151
		GTLPAQNCPQEDDVCFSR	scaffold00067:+:272944-272997				KB665221:+:291790-291843	91	4.43	2093.9	1.19	1047.46	2	C8(Carbamidomethyl); C15(Carbamidomethyl)	4	Midgut
		GCSAESEAICEGNNR	scaffold00067:+:273321-273365				KB665221:+:292167-292211	89	4.79	1653.66	-0.15	827.333	2	C2(Carbamidomethyl); C10(Carbamidomethyl)	1	Midgut
		DGEECDKAAMGAEECDDLNDVCYTR	scaffold00067:+:273951-274025				KB665221:+:292797-292871	74	3.07	2923.11	0.34	975.043	3	C5(Carbamidomethyl); C15(Carbamidomethyl); C22(Carbamidomethyl)	1	Midgut
		SFSSCVQCSSMDESSDCNK	scaffold00067:+:274479-274535				KB665221:+:293325-293381	120	5.17	2214.81	1.5	1107.91	2	C5(Carbamidomethyl); C8(Carbamidomethyl); C17(Carbamidomethyl)	2	Midgut
		CTDPHDLSCVVCEEPGCNQNPWTK	scaffold00067:+:274716-274787				KB665221:+:293562-293633	35	4.96	2903.18	-0.86	968.399	3	C1(Carbamidomethyl); C9(Carbamidomethyl); C12(Carbamidomethyl); C17(Carbamidomethyl)	1	Midgut
IOB_NIMR_0054	scaffold00125:69536-71612	GFVPDEEK	scaffold00125:-:69948-69971	Yes	protein extension	ASTE014871	-	37	-	920.437	0.51	460.722	2		1	Male accessory glands
		SAGTALEGPQTSGAAEAR	scaffold00125:-:69970-70023				-	82	4.93	1673.81	1.38	837.409	2		1	Male accessory glands
		VQEQLLKDR	scaffold00125:-:69996-70022				-	69	3.14	1128.64	-0.26	376.884	3		6	Male accessory glands
		DQQQHPDQQDQQQQQQQDQEVK	scaffold00125:-:70113-70178				-	128	10.6	2734.2	-0.44	1367.61	2		37	Legs; Male accessory glands
		QQGQHDPDEPDHPDHQHLRQK	scaffold00125:-:70179-70241				-	15	3.78	2542.15	-1.71	509.236	5		1	Testis
		QENLRQQGQHDPDEPDHPDHQHLR	scaffold00125:-:70185-70256				-	-	2.33	2926.33	0.54	586.073	5		1	Male accessory glands
		QHDPDQPDHPDQQHHSKQENLR	scaffold00125:-:70242-70307				-	56	6.59	2686.21	-0.78	896.074	3		28	Testis; Male accessory glands
		QHDPDQPDHPDQQHHSK	scaffold00125:-:70257-70307				-	43	6.65	2045.88	1.72	682.633	3		34	Testis; Male accessory glands
		DLRQHDPDQPDHPDQQHHSK	scaffold00125:-:70257-70316				-	18	4.45	2430.09	-0.5	486.824	5		1	Male accessory glands
		VQDQQQQK	scaffold00125:-:70486-70509				-	40	2.62	1001.5	0	501.254	2		26	Male accessory glands; Testis
		QWQEQWKVQDQQQQK	scaffold00125:-:70486-70530				-	51	4.35	2014.98	1.59	672.33	3		2	Male accessory glands
		YPDGDYGGSDGNDPWGIK	scaffold00125:-:70699-70752				-	108	6.28	1912.79	-2.42	956.901	2		8	Testis; Male accessory glands
		YPDGDYGGVQYPDGDYGDDQGDVK	scaffold00125:-:70753-70824				-	69	4.54	2595.04	-0.69	1298.02	2		4	Male accessory glands
		QAQQIPLLPDVPIPVDGGDDGDIQSDVK	scaffold00125:-:70825-70908				-	70	5.98	2929.48	-0.09	1465.24	2		46	Testis; Male accessory glands
		EEAKQAQQIPLLPDVPIPVDGGDDGDIQSDVK	scaffold00125:-:70825-70920				-	26	3.89	3386.69	-0.75	1129.57	3		1	Male accessory glands
		HIAKEmQIQmEAR	scaffold00125:-:70954-70992				-	42	4.98	1616.79	0.16	539.601	3	M6(Oxidation); M10(Oxidation)	5	Male accessory glands
		VQNEQKQQHEEQLVQQLK	scaffold00125:-:70993-71046				-	85	7.64	2234.16	1.28	1117.58	2		26	Haemolymph; Male accessory glands
		GEIAEEQEKQIGR	scaffold00125:-:71116-71154				-	92	4.21	1486.75	1.06	743.879	2		7	Male accessory glands
		DQQQGQKLPQQDHQQR	scaffold00125:-:71242-71289				-	62	4.98	1961.95	-0.49	654.656	3		13	Male accessory glands
		DQTPQDQSTQAPQTIPEQK	scaffold00125:-:71347-71403				-	78	4.7	2140.01	-1	1070.51	2		8	Testis; Male accessory glands
IOB_NIMR_0055	scaffold00125:72410-73773	LRQSNDIIPLSCR	scaffold00125:-:72503-72541	Yes	novel gene		-	-	3.54	1571.84	3.58	786.423	2	C12(Carbamidomethyl)	1	Male accessory glands
		QSNDIIPLSCR	scaffold00125:-:72503-72535				-	69	3.76	1302.63	-11.22	651.82	2	C10(Carbamidomethyl)	26	Testis; Male accessory glands
		LDANSDRPNDDWGLEGKLR	scaffold00125:-:72536-72592				-	60	4.85	2171.06	3.43	724.357	3		1	Male accessory glands
IOB_NIMR_0056	scaffold00125:73306-73623	SEPYDDWGLEGILR	scaffold00125:-:73471-73512	Yes	Annotated		-	79	3.22	1649.79	3.43	825.397	2		5	Testis; Male accessory glands
		RLLEEQELQR	scaffold00125:-:73528-73557				-	68	4.47	1313.72	-1.33	657.361	2		20	Testis; Male accessory glands
		QQEHEILQWVKR	scaffold00125:-:73555-73590				-	-	3.93	1593.85	2.94	531.956	3		2	Male accessory glands
IOB_NIMR_0057	scaffold00125:81408-81925	SRDNSIASVR	scaffold00125:-:81690-81719	Yes	Annotated		-	69	4.04	1104.58	3.27	552.793	2		7	Testis; Male accessory glands
IOB_NIMR_0058	scaffold00125:87394-88395	NAQPSKPHKVEDIMR	scaffold00125:-:87684-87728	Yes	protein extension	ASTE007607	-	75	5.18	1749.9	-1.33	875.456	2		12	Testis; Male accessory glands
IOB_NIMR_0059	scaffold01930:667-2365	SESANIHNHNPPTHAR	scaffold01930:-:1511-1558	Yes	Annotated		KB665210:+:228311-228358	52	4.19	1781.84	0.21	594.619	3		7	Testis; Fatbody; Male accessory glands; Ovary
IOB_NIMR_0060	scaffold02563:1-1956	QDGAAVVEGLKGPSAR	scaffold02563:+:179-226	Yes	Annotated		KB664726:+:27898-27945	60	4.44	1554.82	0.61	518.946	3		1	Midgut
		EPSNTPQWQK	scaffold02563:+:450-479				KB664726:+:28169-28198	41	3.14	1214.58	0.85	607.794	2		3	Brain; Testis
		lIEIAck	scaffold02563:+:513-533				KB664726:+:28232-28252	39	-	1123.64	-1.18	562.326	2	N-Term(iTRAQ4plex); C6(Methylthio); K7(iTRAQ4plex)	1	Ovary; Malpighian tubules; Midgut; Fatbody
IOB_NIMR_0061	scaffold03440:348-1653	VLEAEVENIKEELVK	scaffold03440:-:1473-1517	Yes	Annotated	ASTE009812	KB664999:-:56224-56268	70	1.7	1741.96	-0.01	581.324	3		2	Salivary gland
IOB_NIMR_0062	scaffold04078:900-1472	IVDLSKCEDIDYIVWEMLGR	scaffold04078:-:1085-1144	Yes	novel gene		-	57	6.11	2470.21	3.53	824.074	3	C7(Carbamidomethyl); M17(Oxidation)	1	Male accessory glands
		CEDIDYIVWEMLGR	scaffold04078:-:1085-1126				-	100	4.55	1798.81	-0.24	899.91	2	C1(Carbamidomethyl)	5	Male accessory glands
		LNNEYFTPTVGVLPPCTYETK	scaffold04078:-:1145-1207				-	57	4.34	2443.23	19.3	1222.12	2	C16(Carbamidomethyl)	15	Testis; Male accessory glands
IOB_NIMR_0063	scaffold04388:68-1298	nEANFYNVVLk	scaffold04388:-:152-184	Yes	protein extension	ASTE007064	KB664481:+:162149-162181	65	3.36	1310.67	-0.72	655.84	2		14	Brain; Fatbody; Head; Male accessory glands; Maxillary palps; Midgut; Ovary; Salivary gland
		GDAYLSELYR	scaffold04388:-:308-337				KB664481:+:161996-162025	56	2.83	1186.57	-0.22	593.79	2		10	Brain; Antennae; Fatbody; Maxillary palps; Midgut; Ovary; Proboscis
		FTEETLDEIVR	scaffold04388:-:395-427				KB664481:+:161906-161938	42	4.59	1495.77	-6.25	748.387	2	N-Term(iTRAQ4plex)	1	Ovary; Malpighian tubules; Midgut; Fatbody
		fTEETLDEIVR	scaffold04388:-:395-427				KB664481:+:161906-161938	42	4.59	1495.77	-6.25	748.387	2	N-Term(iTRAQ4plex)	1	Ovary; Malpighian tubules; Midgut; Fatbody
		KPANPFKDIDR	scaffold04388:-:92-124				KB664481:+:162209-162241	50	3.29	1300.7	0.88	434.239	3		1	Midgut
IOB_NIMR_0064	scaffold05547:664-855	VPDSAcAGTAFLTGVK	scaffold05547:-:784-831	Yes	Annotated	ASTE008984	KB664345:+:256150-256197	117	5.57	1593.79	-0.36	797.4	2	C6(Carbamidomethyl)	48	Fatbody; Larvae; Midgut; Pupae
IOB_NIMR_0065	scaffold06351:218-786	NDGTLPGCTFGDIGCEDVIIPIIR	scaffold06351:-:371-442	Yes	Annotated		-	117	4.72	2632.27	0.1	1316.64	2	C8(Carbamidomethyl); C15(Carbamidomethyl)	8	Testis; Male accessory glands
IOB_NIMR_0066	scaffold06604:1-1108	YEPFKDEASLAAAPVEQR	scaffold06604:+:51-104	Yes	Annotated		KB664450:-:342486-342539	102	3.73	2021	0.88	1011	2		1	Ovary
IOB_NIMR_0067	scaffold08424:1-903	ETWNLDLVEPVSGNYYPVTAK	scaffold08424:+:17-79	Yes	Annotated	ASTE003236	KB664744:-:680763-680825	51	4.23	2395.18	-1.64	1198.09	2		4	Testis; Fatbody; Larvae
		GKHWLFFGSSQK	scaffold08424:+:260-295				KB664744:-:680547-680582	49	5.1	1421.74	1.78	711.371	2		3	Larvae; Pupae
		FEHLFEK	scaffold08424:+:509-529				KB664744:-:680313-680333	28	-	949.477	-0.58	475.242	2		2	Testis
		NEDPAYSQVVR	scaffold08424:+:530-562				KB664744:-:680280-680312	-	2.47	1277.62	3.16	639.312	2		1	Testis
		IAIEDDQSR	scaffold08424:+:80-106				KB664744:-:680736-680762	72	2.67	1046.51	-0.4	523.759	2		3	Larvae; Midgut
IOB_NIMR_0068	scaffold09617:219-890	KMEEQEQSNPPAK	scaffold09617:-:535-573	Yes	novel gene		KB664510:-:97948-97986	77	5	1515.71	-1.53	758.358	2		3	Ovary; Testis
		VNNYSNFVR	scaffold09617:-:505-531				KB664510:-:97918-97944	83	2.88	1112.55	-0.2	556.778	2		2	Ovary
		KAALLNSSTPK	scaffold09617:-:688-720				KB664510:-:98101-98133	-	4.21	1129.66	-0.07	565.332	2		2	Ovary
IOB_NIMR_0069	scaffold09901:3-870	SFLTMDCTNPNLCHGR	scaffold09901:+:649-696	Yes	Annotated		-	125	5.63	1938.83	2.46	969.919	2	M5(Oxidation); C7(Carbamidomethyl); C13(Carbamidomethyl)	8	Salivary gland
		TLYGEQDDDLPFVCGMR	scaffold09901:+:373-423				-	82	2.98	2031.87	-4.17	1016.44	2	C14(Carbamidomethyl); M16(Oxidation)	3	Salivary gland
		TVFTAHWR	scaffold09901:+:211-234				-	64	2.47	1017.52	-2.31	509.266	2		10	Salivary gland
		TKSFLTMDCTNPNLCHGR	scaffold09901:+:643-696				-	67	3.84	2151.96	-6.71	717.991	3	C9(Carbamidomethyl); C15(Carbamidomethyl)	1	Salivary gland
		KALNVSEFGQK	scaffold09901:+:790-822				-	88	4.85	1220.67	6.76	610.839	2		7	Salivary gland
IOB_NIMR_0070	scaffold11593:7-748	DEGTAPEPMDVER	scaffold11593:+:580-618	Yes	Annotated		-	-	3.49	1445.62	-0.26	723.314	2		1	Ovary
IOB_NIMR_0071	scaffold11899:34-782	EEQFSMAHDSDGAVIQAEHK	scaffold11899:-:416-475	Yes	novel gene		-	61	2.6	2228.99	-0.53	743.667	3		1	Salivary gland
IOB_NIMR_0072	scaffold15230:103-547	DQTDGNAEALQAEIDR	scaffold15230:-:335-382	Yes	Annotated		-	96	4.51	1745.79	-0.35	873.4	2		1	Midgut
		DLDASNQTILDLNAK	scaffold15230:-:185-229				-	60	3.06	1630.83	0.35	815.918	2		1	Midgut
IOB_NIMR_0073	scaffold15466:36-647	TPNPLQSSPFLHSIKR	scaffold15466:-:129-176	Yes	Annotated		KB664459:-:239670-239717	81	6.15	1822	3.31	911.505	2		5	Brain
IOB_NIMR_0074	scaffold16294:2-640	ISADQSNQLVQMALESK	scaffold16294:-:526-576	Yes	novel gene		-	141	5.24	1861.93	-0.5	931.469	2		2	Midgut
IOB_NIMR_0075	scaffold23207:1-505	QHVADDYAR	scaffold23207:+:133-159	Yes	novel gene		KB664744:-:689841-689867	49	2.36	1074.5	1.64	537.753	2		1	Testis
		LPVKDGQYSVLNDR	scaffold23207:+:361-402				-	86	5.83	1603.84	0.01	802.426	2		9	Haemolymph; Larvae; Midgut; Pupae
		DVmGVmQHHDAITGTEK	scaffold23207:+:82-132				KB664744:-:689868-689918	36	3.86	1900.85	1.03	634.29	3	M3(Oxidation); M6(Oxidation)	2	Fatbody; Haemolymph
		DVMGVMQHHDAITGTEK	scaffold23207:+:82-132				KB664744:-:689868-689918	36	3.86	1900.85	1.03	634.29	3	M3(Oxidation); M6(Oxidation)	2	Fatbody; Haemolymph
IOB_NIMR_0076	scaffold00067:275677-277995	GCLSQLTATNQK	scaffold00067:+:276437-276472	Yes	protein extension	ASTE008151	KB665221:+:295081-295116	54	3.3	1320.66	0.9	660.833	2	C2(Carbamidomethyl)	1	Midgut
		ICQSSSSVACHTCEGNGCNTPK	scaffold00067:+:276473-276538				KB665221:+:295117-295182	52	5.24	2453.99	-0.41	818.668	3	C2(Carbamidomethyl); C10(Carbamidomethyl); C13(Carbamidomethyl); C18(Carbamidomethyl)	1	Midgut
		CVACSEEGCNDLPK	scaffold00067:+:275714-275755				KB665221:+:294359-294400	34	2.77	1638.65	-2.56	819.829	2	C1(Carbamidomethyl); C4(Carbamidomethyl); C9(Carbamidomethyl)	1	Midgut
IOB_NIMR_0077	scaffold00067:-484175-486126	SSSLHSTIETPLDYLSLAAR	scaffold00067:+:484659-484718	Yes	novel gene		-	62	6.1	2161.11	-1.15	1081.06	2		5	Testis
		QFSMDSAVPIDFYQHPVPSSVK	scaffold00067:+:484938-485003				-	50	5.3	2479.19	-1.3	827.069	3		3	Testis
		AILPTAEQLDQFSR	scaffold00067:+:484611-484652				-	72	3.54	1588.86	16.23	794.933	2		2	Testis
		NLTTDIQAKPDR	scaffold00067:+:485637-485672				-	80	4.35	1371.73	2.38	686.367	2		3	Testis
		IQLGAEPLR	scaffold00067:+:485787-485813				-	66	1.91	996.582	-1.7	498.795	2		1	Testis
		cVScNHEATMR	scaffold00067:+:485814-485846				-	72	3.55	1364.56	5.19	682.782	2	C1(Carbamidomethyl); C4(Carbamidomethyl)	5	Testis
IOB_NIMR_0078	scaffold00068:667529-668157	IASEGLDPNYIDR	scaffold00068:+:668113-668151	Yes	Annotated	ASTE009221	KB664577:+:709347-709385	104	4.16	1462.71	-1.99	731.861	2		4	Fatbody; Ovary; Malpighian tubules
IOB_NIMR_0079	scaffold00068:-211025-212844	QKDGNYAIR	scaffold00068:-:212145-212171	Yes	protein extension	ASTE015034	-	63	-	1064.55	-0.79	532.777	2		1	Testis
		cPHAPTAAGTSNQVPAK	scaffold00068:-:212445-212495				-	87	5.93	1706.83	3.48	569.616	3	C1(Carbamidomethyl)	3	Testis
		NSPNTGGPPVPIPTNR	scaffold00068:-:212724-212771				-	100	4.04	1617.84	3.08	809.423	2		10	Testis
		QLTVSLIGSIIR	scaffold00068:-:212688-212723				-	69	3.58	1299.8	-0.87	650.403	2		6	Testis; Male accessory glands
		FAIDVPQVVR	scaffold00068:-:212658-212687				-	61	3.24	1143.65	0.87	572.33	2		9	Testis; Male accessory glands
IOB_NIMR_0080	scaffold00075:686600-687073	MVLCDGENLAYNDITGTYDPHR	scaffold00075:-:686958-687023	Yes	novel gene		-	116	8.09	2570.11	-6.04	857.376	3	M1(Oxidation); C4(Carbamidomethyl)	8	Testis
		DSIFIPVDPYGR	scaffold00075:-:686628-686663				-	67	2.51	1378.7	2.07	689.855	2		3	Testis
		VIGYTFFR	scaffold00075:-:686664-686687				-	-	1.89	1002.54	1.52	501.775	2		1	Testis
		FEATYHDYPAVVLGR	scaffold00075:-:686688-686732				-	81	3.89	1737.86	2.8	579.96	3		1	Testis
		RFEATYHDYPAVVLGR	scaffold00075:-:686688-686735				-	51	4.55	1893.96	-0.36	631.992	3		4	Testis
		ANDTEAAVVSER	scaffold00075:-:686736-686771				-	103	4.33	1261.61	3.79	631.307	2		6	Testis
		KANDTEAAVVSER	scaffold00075:-:686736-686774				-	115	5.49	1389.7	3.18	695.354	2		4	Testis
		RAGHPSSSTMTR	scaffold00075:-:687066-687101				-	51	-	1287.62	0.9	644.315	2		2	Testis
IOB_NIMR_0081	scaffold00089:265896-268515	SDTETFSEIQPR	scaffold00089:-:267306-267341	Yes	novel gene		-	87	-	1409.65	-1.58	705.33	2		1	Ovary
IOB_NIMR_0082	scaffold00090:213979-214694	TGTGTATGETPATTSK	scaffold00090:+:214250-214297	Yes	novel exon	ASTE009080	-	102	5.45	1480.71	-0.61	740.86	2		10	Brain; Testis; Antennae; Legs; Midgut; Ovary; Proboscis
IOB_NIMR_0083	scaffold00090:208818-210373	NVNcSVDESIAR	scaffold00090:-:209637-209672	Yes	Annotated	ASTE009079	KB664810:-:848126-848161	61	4.17	1496.69	-5.35	748.847	2	N-Term(iTRAQ4plex); C4(Methylthio)	1	Ovary; Malpighian tubules; Midgut; Fatbody
		KNVNcSVDESIAR	scaffold00090:-:209637-209675				KB664810:-:848126-848164	81	4.05	1491.72	0.74	746.365	2	C5(Carbamidomethyl)	5	Brain; Testis; Fatbody; Ovary
		lPGISYPVLTPNLk	scaffold00090:-:209830-209871				KB664810:-:848319-848360	91	4.45	1511.88	1.11	756.446	2		29	Brain; Malpighian tubules; Salivary gland; Testis; Antennae; Fatbody; Legs; Male accessory glands; Maxillary palps; Ovary; Proboscis
		wVPQMGDNAEVLk	scaffold00090:-:209884-209922				KB664810:-:848373-848411	76	3.47	1486.74	1.67	743.873	2		14	Testis; Antennae; Malpighian tubules; Midgut; Ovary; Proboscis; Salivary gland
		TIEATSFVSAK	scaffold00090:-:209923-209955				KB664810:-:848412-848444	91	3.12	1153.61	0.36	577.309	2		18	Salivary gland; Testis; Antennae; Fatbody; Legs; Male accessory glands; Malpighian tubules; Maxillary palps; Ovary; Proboscis
		IELINQLSETGLR	scaffold00090:-:209956-209994				KB664810:-:848445-848483	61	4.87	1629.92	-6.9	815.463	2	N-Term(iTRAQ4plex)	3	Ovary; Malpighian tubules; Midgut; Fatbody
		GYVSTVVGCPYEGK	scaffold00090:-:209481-209498
IOB_NIMR_0084	scaffold00101:410081-411667	KLMYTLSNQIK	scaffold00101:-:411572-411604	Yes	protein extension	ASTE004453	KB665365:+:502255-502287	57	5.45	1338.75	0.19	669.876	2		4	Thorax; Salivary gland
		KLmYTLSNQIK	scaffold00101:-:411572-411604				KB665365:+:502255-502287	57	5.45	1338.75	0.19	669.876	2		4	Thorax; Salivary gland
		DDKKLmYTLSNQIK	scaffold00101:-:411572-411613				KB665365:+:502246-502287	30	6.3	1712.89	1.5	571.635	3	M6(Oxidation)	1	Thorax
		KLMYTLR	scaffold00101:-:411585-411605
		DINDVYSYTSISHKK	scaffold00101:-:411614-411658				KB665365:+:502201-502245	74	4.82	1769.87	-0.18	885.439	2		11	Thorax; Salivary gland; Legs; Proboscis
IOB_NIMR_0085	scaffold00102:276474-282917	SVKYPIGAGEKPYTFIYDR	scaffold00102:-:276534-276590	Yes	Annotated	ASTE009900	-	79	5.11	2204.12	-7.63	1102.56	2		4	Salivary gland
		AVHFTYLADDKITR	scaffold00102:-:276873-276914				-	70	6.21	1649.86	-5.75	825.431	2		14	Salivary gland
		AVHFTYLADDK	scaffold00102:-:276882-276914				-	69	4.61	1279.63	0.85	640.32	2		8	Salivary gland
		VVHLPGGAVR	scaffold00102:-:277278-277307				-	64	2.98	1004.6	0.04	335.538	3		3	Salivary gland
		AYSYVPFNFLLSSLFPEQNGFAHK	scaffold00102:-:277308-277379				-	15	4.67	2776.38	0.68	926.131	3		1	Salivary gland
		VSVWVDGVLTQETLLEQHATDGVPER	scaffold00102:-:277806-277883				-	101	6.88	2878.46	-0.2	960.157	3		6	Salivary gland
		NGLLGIVHSR	scaffold00102:-:278082-278111				-	82	4.32	1065.62	2.96	533.313	2		6	Salivary gland
		RPcVVEMKPR	scaffold00102:-:278133-278162				-	62	3.49	1271.67	-0.92	424.562	3	C3(Carbamidomethyl)	1	Salivary gland
		RPcVVEmKPR	scaffold00102:-:278133-278162				-	62	3.49	1271.67	-0.92	424.562	3	C3(Carbamidomethyl)	1	Salivary gland
		TVVFSEQVQVQQFVTDSK	scaffold00102:-:278190-278243				-	103	4.97	2069.05	-4.4	1035.03	2		5	Salivary gland
		GDVSAVLTASGLMK	scaffold00102:-:278274-278315				-	78	3.72	1348.71	-1	674.86	2		11	Salivary gland
		GDVSAVLTASGLmK	scaffold00102:-:278274-278315				-	78	3.72	1348.71	-1	674.86	2		11	Salivary gland
		FSPLSmPFEAK	scaffold00102:-:278334-278366				-	67	2.81	1269.62	-0.67	635.312	2	M6(Oxidation)	3	Salivary gland
		FSPLSMPFEAK	scaffold00102:-:278334-278366				-	67	2.81	1269.62	-0.67	635.312	2	M6(Oxidation)	3	Salivary gland
		FVVSVAPTATHPEIEIDHIR	scaffold00102:-:278367-278426				-	83	5.3	2231.17	-6.81	1116.09	2		3	Salivary gland
		QIVGQWNYVETIIDTTHFPTTAK	scaffold00102:-:278433-278501				-	78	7.57	2662.35	0.57	888.122	3		4	Salivary gland
		AYAADGHEVLDRK	scaffold00102:-:278946-278984				-	86	4.04	1444.72	-0.96	722.862	2		4	Salivary gland
		AYAADGHEVLDR	scaffold00102:-:278949-278984				-	87	3.88	1316.62	-0.12	658.815	2		8	Salivary gland; Haemolymph
		KAYAADGHEVLDR	scaffold00102:-:278949-278987				-	90	5.27	1444.72	-0.79	722.862	2		10	Salivary gland
		QETVTFAAEEK	scaffold00102:-:279294-279326				-	72	3.79	1252.62	11.31	626.814	2		6	Salivary gland
		VYFFDRQETVTFAAEEK	scaffold00102:-:279294-279344				-	67	5.31	2080	-2.37	1040.5	2		7	Salivary gland
		SEEIQLVVPHYVQTQPK	scaffold00102:-:279360-279410				-	78	5.7	1995.05	-1.23	998.03	2		16	Salivary gland
		IVSTASGATIFDmNTTK	scaffold00102:-:279411-279461				-	67	-	1772.87	-0.62	886.94	2	M13(Oxidation)	1	Salivary gland
		IVSTASGATIFDMNTTK	scaffold00102:-:279411-279461				-	67	-	1772.87	-0.62	886.94	2	M13(Oxidation)	1	Salivary gland
		QHLDEDTIR	scaffold00102:-:279534-279560				-	65	-	1126.55	0.09	563.778	2		1	Salivary gland
		KSTGPHAAALNK	scaffold00102:-:279798-279833				-	-	4.46	1194.66	0.43	398.891	3		1	Salivary gland
		IFDYYTTK	scaffold00102:-:279945-279968				-	57	-	1050.51	-0.62	525.76	2		1	Salivary gland
		DVLEIHVR	scaffold00102:-:280002-280025				-	-	1.94	980.553	0.25	327.522	3		1	Salivary gland
		KDVLEIHVR	scaffold00102:-:280002-280028				-	64	3.68	1108.65	-0.65	554.827	2		5	Salivary gland
IOB_NIMR_0086	scaffold00108:290130-291377	ATQHQQSSSTTVGSDPSQNNDSQELQLENK	scaffold00108:+:290324-290413	Yes	Annotated	ASTE006267	-	103	11.35	3258.47	0.11	1086.83	3		16	Testis
		cFDTAHVK	scaffold00108:+:290462-290485				-	32	3.14	977.45	-0.88	326.488	3	C1(Carbamidomethyl)	9	Testis
		TIPLTGYDDFK	scaffold00108:+:290642-290674				-	82	2.92	1269.64	-0.22	635.322	2		23	Testis
		TIPLTGYDDFKAK	scaffold00108:+:290642-290680				-	-	2.49	1468.76	-3.84	490.259	3		1	Testis
IOB_NIMR_0087	scaffold00115:189325-198334	MLSSLIEGIEK	scaffold00115:+:190151-190183	Yes	Annotated	ASTE005792	KB664496:-:212179-212211	76	3.41	1219.66	2.11	610.335	2		3	Testis; Ovary
		VcFTNVTSYTIGK	scaffold00115:+:190184-190222				KB664496:-:212140-212178	67	3.86	1489.74	0.12	745.372	2	C2(Carbamidomethyl)	1	Ovary
		EPAPTTKPNTLQATEPSVAPSEALSSPR	scaffold00115:+:190816-190899				KB664496:-:211461-211544	55	3.27	2876.47	1.63	959.494	3		1	Testis
		LPTVESNAALK	scaffold00115:+:191272-191304				KB664496:-:211035-211067	73	3.34	1142.64	-0.62	571.824	2		3	Ovary
		HGSINHTVcGER	scaffold00115:+:192717-192752				KB664496:-:209588-209623	42	4.27	1366.63	1.3	456.215	3	C9(Carbamidomethyl)	1	Testis
		AISEPPAISTGPPIAPTQETADEERER	scaffold00115:+:197359-197439				KB664496:-:204906-204986	-	2.44	2862.41	-0.49	954.808	3		1	Ovary
IOB_NIMR_0088	scaffold00123:327261-328191	GQYTLIDADGYR	scaffold00123:+:327612-327647	Yes	exon extension	ASTE009098	-	49	2.68	1371.65	-2.39	686.329	2		1	Antennae
		VAYAPHQEAVNHVQFHGPSSNYNY	scaffold00123:+:327945-328016				-	11	4.18	2729.25	0.82	910.422	3		2	Antennae; Proboscis
IOB_NIMR_0089	scaffold00123:330332-331371	VIAPLPVAK	scaffold00123:-:330928-330954	Yes	exon extension	ASTE009099	-	49	1.92	907.597	-1	454.302	2		2	Antennae
IOB_NIMR_0090	scaffold00123:335140-335790	VAVPVAHYVAPALK	scaffold00123:-:335431-335472	Yes	protein extension	ASTE009100	-	81	5.43	1434.85	3.94	717.93	2		60	Brain; Testis; Antennae; Fatbody; Head; Legs; Maxillary palps; Proboscis
IOB_NIMR_0091	scaffold00125:63918-65004	AQVEQVPEQQVQQTEKQTK	scaffold00125:-:64118-64174	Yes	protein extension	ASTE007604	-	44	4.08	2226.12	-7.63	742.711	3		1	Male accessory glands
		VPQGPPSAQIK	scaffold00125:-:64259-64291				-	86	3.69	1121.65	14.8	561.328	2		28	Testis; Male accessory glands
		SPQGPPSPPIKDSPPEAK	scaffold00125:-:64292-64345				-	110	6.75	1828.95	3.12	914.979	2		54	Testis; Male accessory glands
		SPQGPPSPPIK	scaffold00125:-:64313-64345				-	62	3.76	1104.6	-0.38	552.806	2		15	Testis; Male accessory glands
		TPQGPASEK	scaffold00125:-:64682-64708				-	67	2.77	914.46	2.38	457.734	2		5	Testis; Male accessory glands
		APHAQEVPSTKSPVK	scaffold00125:-:64724-64768				-	71	4.79	1575.85	-0.28	788.428	2		3	Fatbody; Male accessory glands
		APHAQEVPSTK	scaffold00125:-:64736-64768				-	75	3.87	1164.6	0.79	582.804	2		6	Testis; Male accessory glands
		QPPQHVPQTK	scaffold00125:-:64769-64798				-	20	2.03	1159.62	0.04	387.212	3		1	Male accessory glands
		DKQPPQHVPQTK	scaffold00125:-:64769-64804				-	15	2.28	1402.74	-0.86	468.252	3		1	Male accessory glands
		QEPTTPPGEPAKDK	scaffold00125:-:64799-64840				-	56	4.09	1494.75	4.92	747.879	2		11	Testis; Male accessory glands
		QEPTTPPGEPAK	scaffold00125:-:64805-64840				-	67	2.92	1251.62	-0.77	626.314	2		5	Testis; Male accessory glands
		QAAAEEFPLEQAVQQQQPEPTPVKVPAAK	scaffold00125:-:64841-64927				-	66	7.64	3129.62	-2.06	1043.88	3		30	Testis; Male accessory glands
		QAAAEEFPLEQAVQQQQPEPTPVK	scaffold00125:-:64856-64927				-	114	7.7	2663.33	-0.06	1332.17	2		15	Testis; Male accessory glands
IOB_NIMR_0092	scaffold00057:1171301-1172195	TLQSQYNWKPMSETFEK	scaffold00057:+:1171471-1171521	Yes	novel gene		-	81	4.12	2117	0.87	1059.01	2		2	Testis
		TLQSQYNWKPmSETFEK	scaffold00057:+:1171471-1171521				-	81	4.12	2117	0.87	1059.01	2		2	Testis
		AKFPLHYDDK	scaffold00057:+:1171528-1171557				-	47	3.86	1233.62	-1.34	411.88	3		3	Testis
		LVDPYLTTTMK	scaffold00057:+:1171777-1171809				-	70	2.95	1281.69	14.67	641.351	2		3	Testis
		HQHDTVTFWNWTDREER	scaffold00057:+:1171831-1171881				-	25	5.96	2257.02	0.31	565.01	4		1	Testis
		RIPNASDSLQPR	scaffold00057:+:1171885-1171920				-	69	4.18	1353.73	4.62	677.368	2		1	Testis
IOB_NIMR_0093	scaffold00057:326204-331064	ELAEITLDPPPNcSAGPK	scaffold00057:+:327645-327698	Yes	protein extension	ASTE006469	KB664288:+:3102072-3102125	72	3.42	1908.93	-3.75	954.969	2	C13(Carbamidomethyl)	4	Testis; Fatbody; Ovary
IOB_NIMR_0094	scaffold00057:1051913-1062616	SFSAmQDASAK	scaffold00058:-:1053205-1053237	Yes	novel gene		KB664678:+:53876-53908	61	2.52	1142.51	-0.87	571.76	2		3	Male accessory glands
		VGNAQGRPPTGK	scaffold00058:-:1053241-1053276				KB664678:+:53837-53872	71	4.8	1181.64	3.19	591.325	2		5	Testis
IOB_NIMR_0095	scaffold00062:814578-816252	LTWQSADSR	scaffold00062:-:815610-815636	Yes	protein extension	ASTE003639	-	57	2.29	1063.51	-2.27	532.261	2		6	Salivary gland; Testis; Maxillary palps; Ovary
		cPQIVIK	scaffold00062:-:815652-815672				-	32	2.83	857.492	1.15	429.25	2	C1(Carbamidomethyl)	2	Fatbody; Antennae
		nAANADLVPAEQANVk	scaffold00062:-:815673-815720				-	64	4.2	1913.03	-0.58	957.02	2	N-Term(iTRAQ4plex); K16(iTRAQ4plex)	1	Midgut
IOB_NIMR_0096	scaffold00062:435127-437093	QDSAASVVDGAK	scaffold00062:+:435490-435525	Yes	novel gene	ASTE003639	KB664444:+:268086-268121	93	4.34	1147.56	2.43	574.285	2		1	Testis
IOB_NIMR_0097	scaffold00057:1170710-1171180	ALDQGVQFGFITSDR	scaffold00057:+:1170812-1170856	No	Annotated	ASTE015293	-	97	5.2	1653.83	3.45	827.418	2		4	Testis
		ALDQGVQFGFITSDRR	scaffold00057:+:1170812-1170859				-	45	2.59	1809.93	3.63	603.982	3		2	Testis
		FENYHFNNK	scaffold00057:+:1170896-1170922				-	28	3.15	1212.54	-0.4	404.852	3		3	Testis
		IFAAGATPK	scaffold00057:+:1171133-1171159				-	-	3.06	875.495	-3.9	438.251	2		1	Testis
IOB_NIMR_0098	scaffold00062:603488-605500	IIQIGLSHFK	scaffold00062:+:604251-604280	Yes	protein extension	ASTE008135	KB664444:+:480574-480603	28	2.86	1155.69	0.75	385.901	3		1	Testis
IOB_NIMR_0099	scaffold00063:881394-881678	QTDTEDLPYFQNYDR	scaffold00063:+:881469-881513	No	Annotated	ASTE002708	-	100	3.82	1904.84	7.88	952.926	2		3	Testis
		HVHYYVESAVK	scaffold00063:+:881541-881573				-	57	4.26	1331.68	0.8	666.341	2		4	Testis
		ATNTNSDTANVR	scaffold00063:+:881580-881615				-	57	-	1263.59	1.18	632.301	2		1	Testis
IOB_NIMR_0100	scaffold00065:651502-655802	iAQFIcEk	scaffold00065:-:655013-655036	Yes	novel gene		KB664461:+:392690-392713	46	3.49	1285.68	-4.42	643.345	2	N-Term(iTRAQ4plex); C6(Methylthio); K8(iTRAQ4plex)	1	Ovary; Malpighian tubules; Midgut; Fatbody
		IAQFIcEK	scaffold00065:-:655013-655036				KB664461:+:392690-392713	46	3.49	1285.68	-4.42	643.345	2	N-Term(iTRAQ4plex); C6(Methylthio); K8(iTRAQ4plex)	1	Ovary; Malpighian tubules; Midgut; Fatbody
		nFIDVGAGVVDEDYR	scaffold00065:-:655103-655147				KB664461:+:392579-392623	45	4.65	1812.88	-5.62	906.943	2	N-Term(iTRAQ4plex)	1	Ovary; Malpighian tubules; Midgut; Fatbody
		QLVMTDIQVQVPEGcYGR	scaffold00065:-:655178-655231				KB664461:+:392495-392548	94	3.51	2093.01	-0.51	1047.01	2	C15(Carbamidomethyl)	2	Testis
		LSEHAFAPTK	scaffold00065:-:655376-655405				KB664461:+:392321-392350	90	3.99	1100.57	-0.44	550.79	2		12	Testis; Fatbody; Midgut; Ovary
IOB_NIMR_0101	scaffold00068:862996-864614	LHSTIEQLK	scaffold00068:-:863247-863273	Yes	protein extension	ASTE009244	-	48	3.37	1068.6	-1.63	534.805	2		1	Testis
		YDSITPSMDALQK	scaffold00068:-:863286-863324				-	66	4.22	1468.7	2.92	734.855	2		5	Testis
		YDSITPSmDALQK	scaffold00068:-:863286-863324				-	66	4.22	1468.7	2.92	734.855	2		5	Testis
		STTGFNLDR	scaffold00068:-:863516-863542				-	70	2.46	1010.49	2.14	505.75	2		2	Testis
		ILSNFDEmNIAK	scaffold00068:-:864119-864154				-	99	4.06	1410.7	2.5	705.852	2	M8(Oxidation)	8	Testis; Male accessory glands
IOB_NIMR_0102	scaffold00065: 469030-470352	HVGQcVSIHLK	scaffold00065:-:469554-469586	Yes	protein extension	ASTE000018	KB664530:+:68880-68912	-	4.37	1277.68	-0.5	426.564	3	C5(Carbamidomethyl)	1	Midgut
IOB_NIMR_0103	scaffold00071: 240712-241701	SLTGSGPMYVGK	scaffold00071:-:240832-240867	No	Annotated	ASTE001895	KB664416:-:506445-506480	49	-	1196.6	-1	598.802	2		1	Midgut
IOB_NIMR_0104	scaffold00074: 227699-231097	cTTSNcGTGcGcESR	scaffold00074:-:228407-228451	Yes	exon extension	ASTE009836	KB664999:-:298112-298156	58	5.46	1806.57	0.62	903.787	2	N-Term(iTRAQ4plex); C1(Methylthio); C6(Methylthio); C10(Methylthio); C12(Methylthio)	1	Ovary; Malpighian tubules; Midgut; Fatbody
IOB_NIMR_0105	scaffold00066:670975-671901	SSQFASVVQNALSVYesLLEEK	scaffold00066:+:671734-671799	No	Annotated	ASTE014164	-	53	-	2428.22	-1.26	1214.61	2		1	Ovary
		ATATVSASK	scaffold00066:+:671188-671214				-	55	-	835.452	-0.07	418.23	2		1	Ovary
IOB_NIMR_01061	scaffold00059:867265-869432	EATVSGFGR	scaffold00059:-:868806-868832	Yes	Annotated	ASTE010946	KB664514:-:59569-59595	46	-	923.458	0.2	462.233	2		2	Larvae; Midgut
		AGTININEGTVR	scaffold00059:-:868989-869024				KB664514:-:59752-59787	82	3.19	1244.66	-1.41	622.832	2		4	Larvae; Midgut
IOB_NIMR_0107	scaffold00065:911416-913526	QNAITHAEVR	scaffold00065:-:912453-912482	Yes	protein extension	ASTE007937	KB664461:+:82478-82507	37	2.38	1138.6	-0.41	380.203	3		1	Testis
IOB_NIMR_0108	scaffold00061:995156-1002553	TcGESLAINDcK	scaffold00061:+:1000545-1000580	Yes	protein extension	ASTE005991	-	72	2.45	1367.6	2.07	684.302	2	C2(Carbamidomethyl); C11(Carbamidomethyl)	1	Testis
		SANSIDYcYcSTDLcNQLTR	scaffold00061:+:1000581-1000640				-	94	5.53	2441.01	-3.11	1221.01	2	C8(Carbamidomethyl); C10(Carbamidomethyl); C15(Carbamidomethyl)	1	Brain
		SIETALMHAHNR	scaffold00061:+:1000656-1000691				-	67	3.44	1379.68	-0.44	460.566	3		2	Brain; Male accessory glands
		SIETALmHAHNR	scaffold00061:+:1000656-1000691				-	67	3.44	1379.68	-0.44	460.566	3		2	Brain; Male accessory glands
		cYIcGEGADGPFR	scaffold00061:+:995206-995244				-	28	-	1501.63	5.28	751.318	2	C1(Carbamidomethyl); C4(Carbamidomethyl)	1	Brain
		TLPTHHGQSSVPTVEGTcEGFRPEEK	scaffold00061:+:995245-995322				-	62	8.93	2880.36	0.37	720.845	4	C18(Carbamidomethyl)	7	Brain; Male accessory glands
IOB_NIMR_0109	scaffold00059:964491-966775	TPTSPGNVASLR	scaffold00059:+:964588-964623	Yes	protein extension	ASTEI010950	KB664514:+:172847-172882	44	2.14	1199.64	-0.97	600.322	2		1	Testis
IOB_NIMR_0110	scaffold00058:1120875-1127871	EQPGGNNPWEAEMVR	scaffold00058:+:1121347-1121391	Yes	protein extension	ASTE000388	KB664732:-:2807847-2807891	64	3.27	1713.76	-0.06	857.386	2		1	Midgut
		AKLEESDYDSEAK	scaffold00058:+:1121620-1121658				KB664732:-:2807580-2807618	78	3.96	1484.67	-1.37	742.84	2		2	Midgut
		LEESDYDSEAK	scaffold00058:+:1121626-1121658				KB664732:-:2807580-2807612	58	2.45	1285.54	1.18	643.276	2		1	Midgut
		lYSFLVIDNPLk	scaffold00058:+:1126269-1126304				KB664732:-:2802945-2802980	-	2.56	1710.01	1.05	570.675	3	N-Term(iTRAQ4plex); K12(iTRAQ4plex)	1	Midgut
IOB_NIMR_0111	scaffold00082:237280-238822	ATLEHYSTQLSPK	scaffold00082:+:237841-237879	Yes	Annotated		-	71	5.51	1474.76	2.1	737.882	2		20	Testis; Male accessory glands
		SRLEPKPFVTIEESIGYAR	scaffold00082:+:237898-237954				-	62	6.13	2192.17	1.65	731.396	3		1	Testis
		LEPKPFVTIEESIGYAR	scaffold00082:+:237904-237954				-	70	5.56	1949.04	2.06	650.352	3		3	Testis
		LREFYLSPADPVPLTEEAER	scaffold00082:+:238081-238140				-	65	5.91	2332.18	-1.83	1166.59	2		18	Testis; Male accessory glands
		EFYLSPADPVPLTEEAER	scaffold00082:+:238087-238140				-	99	4.64	2063.03	15.39	1032.02	2		10	Testis; Male accessory glands
		FLDVPMPAGSR	scaffold00082:+:238174-238206				-	40	-	1189.59	-14.09	595.297	2		1	Testis
		VGHWVWR	scaffold00082:+:238270-238290				-	40	-	939.494	-0.87	470.251	2		1	Testis
		NSVcIESEVK	scaffold00082:+:238525-238554				-	58	3.31	1164.55	-2.31	582.781	2	C4(Carbamidomethyl)	5	Testis
IOB_NIMR_0112	scaffold00107:159941-163179	TNYINDLPTK	scaffold00107:-:161836-161865	Yes	protein extension	ASTE005713	-	52	2.22	1178.61	0.47	589.807	2		1	Testis
		ELEQQLAVAR	scaffold00107:-:160599-160628				-	76	3.03	1156.64	2.86	578.821	2		3	Testis
		RGQEHIER	scaffold00107:-:160671-160694				-	68	3.73	1024.53	3.71	342.182	3		3	Testis
		AYELSAHYK	scaffold00107:-:160893-160919				-	63	2.5	1081.53	-0.12	541.269	2		6	Testis
		QAQmAIAEEEK	scaffold00107:-:160977-161009				-	42	2.94	1263.59	0.14	632.298	2	M4(Oxidation)	1	Testis
		QAQMAIAEEEK	scaffold00107:-:160977-161009				-	42	2.94	1263.59	0.14	632.298	2	M4(Oxidation)	1	Testis
		VLTTQHSEEIR	scaffold00107:-:161085-161117				-	75	3.43	1312.69	3.81	656.849	2		9	Testis
		VGNILEDGDGDRDSDTSPR	scaffold00107:-:161349-161405				-	52	3.41	2017.91	1.13	673.308	3		3	Testis
		NMLEESER	scaffold00107:-:161460-161483				-	44	2.26	1007.44	-1.89	504.226	2		3	Testis
		ESSVYPAFWSR	scaffold00107:-:161574-161606				-	36	2.98	1328.65	14.68	664.827	2		3	Testis
		YREEIIQQmNLK	scaffold00107:-:160349-160384				-	37	-	1580.81	1.58	527.609	3	M9(Oxidation)	1	Testis
		ESQVPER	scaffold00107:-:160135-160155				-	40	-	844.418	3.01	422.713	2		1	Testis
IOB_NIMR_0113		FSTTYSSIYIPPcLDcK	scaffold00107:+:2132-2182	Yes	protein extension	ASTE014654	-	62	3.65	2051.98	15.72	1026.49	2	C13(Carbamidomethyl); C16(Carbamidomethyl)	2	Testis
		cEcGNVPMISK	scaffold00107:+:2393-2425				-	64	3.36	1294.56	0.74	647.784	2	C1(Carbamidomethyl); C3(Carbamidomethyl)	1	Testis
		DYScQTLNQMK	scaffold00107:+:2507-2539				-	58	2.7	1387.6	4.11	694.306	2	C4(Carbamidomethyl)	3	Testis
		EIKPPSNPSR	scaffold00107:+:2585-2614				-	40	-	1124.61	4.58	375.542	3		1	Testis
		YEEPVFcDR	scaffold00107:+:2615-2641				-	57	2.55	1214.52	1.41	607.762	2	C7(Carbamidomethyl)	2	Testis
		LcccNcNH	scaffold00107:+:2690-2713				-	48	-	1137.37	-0.53	569.188	2	C2(Carbamidomethyl); C3(Carbamidomethyl); C4(Carbamidomethyl); C6(Carbamidomethyl)	2	Testis
		QPLWNSTYR	scaffold00107:+:2810-2836				-	56	2.52	1164.58	3.02	582.795	2		5	Testis
		TSYTGQNPLRPLVPPQK	scaffold00107:+:2837-2887				-	69	4.45	1896.04	3.81	948.524	2		11	Testis
IOB_NIMR_0114	scaffold00107:506277-506788	NANEQLETIHR	scaffold00107:+:506444-506476	Yes	Annotated	ASTE005761	-	69	4.44	1324.66	-0.92	662.833	2		7	Testis
		ENEQAPQYSLR	scaffold00107:+:506531-506563				-	43	2.63	1334.64	2.13	667.822	2		2	Testis
		RTDDVVTFWSYR	scaffold00107:+:506564-506599				-	56	4.97	1544.76	9.04	772.885	2		1	Testis
		TDDVVTFWSYR	scaffold00107:+:506567-506599				-	67	3.4	1388.67	17.03	694.84	2		1	Testis
IOB_NIMR_0115	scaffold00108:290130-291377	ATQHQQSSSTTVGSDPSQNNDSQELQLENK	scaffold00108:+:290324-290413	Yes	protein extension	ASTE006267	-	103	11.35	3258.47	0.11	1086.83	3		16	Testis
		cFDTAHVK	scaffold00108:+:290462-290485				-	32	3.14	977.45	-0.88	326.488	3	C1(Carbamidomethyl)	9	Testis
		TIPLTGYDDFK	scaffold00108:+:290642-290674				-	82	2.92	1269.64	-0.22	635.322	2		23	Testis
		TIPLTGYDDFKAK	scaffold00108:+:290642-290680				-	-	2.49	1468.76	-3.84	490.259	3		1	Testis
		mIQEFADQGFSDETIFAK	scaffold00108:+:290681-290734				-	112	4.72	2092.95	-0.06	1046.98	2	M1(Oxidation)	7	Testis
		MIQEFADQGFSDETIFAK	scaffold00108:+:290681-290734				-	112	4.72	2092.95	-0.06	1046.98	2	M1(Oxidation)	7	Testis
IOB_NIMR_0116	scaffold00125:65994-66490	QQDcGLYGK	scaffold00125:-:66396-66422	Yes	Annotated		-	50	3.07	1068.48	-1.33	534.742	2	C4(Carbamidomethyl)	3	Testis
IOB_NIMR_0117	scaffold00048:861399-861823	IADLLISIGER	scaffold00048:+:861441-861473	Yes	Annotated		-	80	3.19	1199.7	0.23	600.354	2		4	Antennae
IOB_NIMR_0118	scaffold00050:309061-310048	QVINVASSTVHPDYLGGVNPSDIAVMR	scaffold00050:-:309552-309632	Yes	Annotated	ASTE006644	KB665199:-:756282-756362	50	4.19	2855.43	-2.02	952.482	3	M26(Oxidation)	1	Larvae
		VVGGIDALPGEFPSIVSIQR	scaffold00050:-:309789-309848				KB665199:-:756519-756578	65	4.29	2054.12	-2.36	1027.57	2		5	Larvae
IOB_NIMR_0119	Scaffold00053:852202-852461	NPASQFLNK	scaffold00053:+:852369-852395	No	Annotated		-	67	-	1018.53	-2.27	509.768	2		2	Testis
IOB_NIMR_0120	scaffold00054:592539-595060	AQLKEDDAMAR	scaffold00054:-:594412-594444	Yes	protein extension	ASTE001386	KB664622:-:411459-411491	62	3.15	1247.61	3	624.308	2		2	Testis
		LEAINALIK	scaffold00054:-:594463-594489				KB664622:-:411510-411536	41	-	984.609	-0.3	492.808	2		1	Testis
		EKLEAINALIK	scaffold00054:-:594463-594495				KB664622:-:411510-411542	48	3.21	1241.75	-0.82	621.376	2		1	Testis
		LADDLQSSK	scaffold00054:-:593742-593768				KB664622:-:410789-410815	59	-	976.495	0.63	488.751	2		1	Testis
		DQSNAFDQLQAEK	scaffold00054:-:594000-594038				KB664622:-:411047-411085	47	3.11	1493.69	2.66	747.349	2		1	Testis
		LRDQSNAFDQLQAEK	scaffold00054:-:594000-594044				KB664622:-:411047-411091	-	4.03	1762.89	11.39	881.95	2		1	Testis
		IKNEITQNQAK	scaffold00054:-:594087-594119				KB664622:-:411134-411166	60	4.18	1286.71	1.8	429.574	3		3	Testis
IOB_NIMR_0121	scaffold00057:346093-347528	fETIPISGQPGYLGQYSYLR	scaffold00057:-:347373-347432	No	Annotated	ASTE006475	KB664288:-:3121299-3121358	51	5.37	2433.25	-1.31	811.756	3	N-Term(iTRAQ4plex)	2	Ovary; Malpighian tubules; Midgut; Fatbody
		SNLLVMEDLTSAGYR	scaffold00057:-:347042-347086				KB664288:-:3120968-3121012	84	3.15	1668.83	1.61	834.918	2		3	Malpighian tubules; Midgut
		EAEIYSQLFNR	scaffold00057:-:347144-347176				KB664288:-:3121070-3121102	50	-	1513.76	-9.59	757.385	2	N-Term(iTRAQ4plex)	1	Ovary; Malpighian tubules; Midgut; Fatbody
		YYDTDDFFR	scaffold00057:-:346147-346173				KB664288:-:3120073-3120099	70	-	1241.51	-3.19	621.257	2		1	Malpighian tubules
		aQFAEQYAEYYYTSLQR	scaffold00057:-:346393-346443				KB664288:-:3120319-3120369	101	4.81	2130.99	4.29	1066	2		5	Testis; Malpighian tubules
		TILQQQLWSNLER	scaffold00057:-:346660-346698				KB664288:-:3120586-3120624	57	5.15	1772.97	-3.04	886.99	2	N-Term(iTRAQ4plex)	1	Ovary; Malpighian tubules; Midgut; Fatbody
IOB_NIMR_0122	scaffold00008:3086622-3087412	MVLENATFR	scaffold00008:+:3086840-3086866	Yes	protein extension	ASTE009584	-	61	2.62	1080.55	-1.24	540.778	2		3	Testis
IOB_NIMR_0123	scaffold00008:3534884-3536255	nRPETSANSGIESDNHSILA	scaffold00008:+:3535979-3536038	Yes	protein extension	ASTE006807	KB664569:+:62024-62083	49	5.24	2256.1	0.58	752.704	3	N-Term(iTRAQ4plex)	2	Midgut; Ovary; Malpighian tubules; Fatbody
IOB_NIMR_0124	scaffold00009:1120241-1120516	IKEAFEELSTDLGVLVR	scaffold00009:+:1120361-1120411	Yes	novel gene	NA	-	59	6.08	1919.05	0.69	640.355	3		1	Testis
IOB_NIMR_0125	scaffold00098:470000-471017	SGTPTTPGSSQIPVPK	scaffold00098:+:470240-470287	Yes	novel gene		-	51	3.45	1553.84	11.57	777.421	2		3	Testis
		TPLTPQTVHER	scaffold00098:+:470288-470320				-	58	4.14	1278.68	1.8	639.845	2		13	Testis
IOB_NIMR_0126	scaffold00098:198413-199144	THHQQLQLQHPGSSASSAAAR	scaffold00103:-:199045-199107	Yes	protein extension	ASTE014481	-	57	7.77	2212.1	0.62	553.78	4		2	Brain
IOB_NIMR_0127	scaffold00157:80456-81734	IFGGEVVSAVTTSR	scaffold00157:-:81277-81318	Yes	protein extension	ASTE009057	-	93	4.03	1422.75	-8.63	711.877	2		16	Testis
		IFLLEQLNFDK	scaffold00157:-:81346-81378				-	71	3.57	1379.76	3.9	690.385	2		15	Testis
		SSLPIKTDVYSALK	scaffold00157:-:80978-81019				-	47	2.76	1521.86	1.77	761.431	2		1	Testis
		NVHVNAITIEHIPK	scaffold00157:-:81020-81061				-	57	5.13	1584.89	3.75	792.949	2		5	Testis
		IDIHSNHGEK	scaffold00157:-:80737-80766				-	56	3.58	1149.57	5.41	575.289	2		2	Testis
IOB_NIMR_0128	scaffold00166:38715-40833	VHLPEHYPFK	scaffold00166:-:39321-39350	Yes	novel gene		-	38	5.19	1266.66	-2.68	422.891	3		7	Legs; Malpighian tubules; Maxillary palps; Proboscis; Salivary gland; Brain
		RMDTDVIK	scaffold00166:-:39462-39485				-	-	2.68	977.508	-0.03	489.258	2		1	Testis
IOB_NIMR_0129	scaffold00166:92833-94861	GKYVLPHVAR	scaffold00166:+:94115-94144	Yes	protein extension	ASTE014382	KB664750:-:12656-12685	38	3.7	1139.67	0.35	380.561	3		2	Larvae; Malpighian tubules
		lcLIATFLEDGIR	scaffold00166:+:94145-94183				KB664750:-:12617-12655	58	3.86	1653.88	-0.02	827.445	2	N-Term(iTRAQ4plex); C2(Methylthio)	2	Ovary; Malpighian tubules; Midgut; Fatbody
		LcLIATFLEDGIR	scaffold00166:+:94145-94183				KB664750:-:12617-12655	58	3.86	1653.88	-0.02	827.445	2	N-Term(iTRAQ4plex); C2(Methylthio)	2	Ovary; Malpighian tubules; Midgut; Fatbody
IOB_NIMR_0130	scaffold00176:18314-25889	DLERFFKGYGR	scaffold00176:-:25311-25343	Yes	protein extension	ASTE001430	KB664622:+:1177527-1177559	39	2.99	1387.71	0.3	463.242	3		1	Midgut
		NGYGFVEFEDYRDADDAVYELNGK	scaffold00176:-:25272-25291
			scaffold00176:-:25141-25192
		NGYGFVEFEDYR	scaffold00176:-:25177-25192
			scaffold00176:-:25272-25291
		VSWQDLKDYMR	scaffold00176:-:24707-24720
			scaffold00176:-:20270-20288
		VSWQDLK	scaffold00176:-:20282-20288
			scaffold00176:-:24707-24720
		KNEGVVEFATLSDMK	scaffold00176:-:20099-20130
			scaffold00176:-:20215-20227
		NEGVVEFATLSDMK	scaffold00176:-:20099-20130
			scaffold00176:-:20215-20224
		DADDAVYELNGKELLGER	scaffold00176:-:25121-25174				KB664622:+:1177696-1177749	96	4.93	2006.96	-3.85	1003.98	2		2	Whole mosquito
		DADDAVYELNGK	scaffold00176:-:25139-25174				KB664622:+:1177696-1177731	79	3.89	1309.59	-0.16	655.299	2		15	Salivary gland; Testis; Fatbody; Midgut; Ovary
		QAGEVTYADAHK	scaffold00176:-:20232-20267				KB664622:+:1182606-1182641	83	3.94	1289.62	4.45	645.313	2		16	Brain; Testis; Male accessory glands; Midgut; Ovary; Salivary gland
IOB_NIMR_0131	scaffold00193:34700-35159	VMLLYcTK	scaffold00193:+:34784-34807	Yes	novel gene		-	42	1.38	1027.53	0.02	514.269	2	C6(Carbamidomethyl)	2	Brain
		VYAYGVEYYLNDVK	scaffold00193:+:34997-35038				-	49	2.38	1695.83	0.2	848.417	2		1	Brain
		RLDTHQLScEDQGR	scaffold00193:+:35051-35092				-	49	5.24	1714.79	-0.03	572.269	3	C9(Carbamidomethyl)	3	Brain
		LDTHQLScEDQGR	scaffold00193:+:35054-35092				-	31	3.86	1558.69	-0.59	520.235	3	C8(Carbamidomethyl)	2	Brain
		WDSGEVFFK	scaffold00193:+:35099-35125				-	40	2.03	1114.52	0.1	557.764	2		4	Brain
		GLVWEEIGVWK	scaffold00193:+:35249-35281				-	63	3	1315.71	1.72	658.357	2		2	Brain
		DIAWPGNSHTPPQGVPEK	scaffold00193:+:35312-35365				-	11	4.81	1929.95	0.05	643.987	3		2	Brain
		ITFLEEAPYINLSPADPVSGK	scaffold00193:+:35378-35440				-	71	4.44	2261.17	0.16	1131.09	2		5	Brain
		VAADHEmTDIDmGQAHK	scaffold00193:+:35471-35521				-	24	1.58	1900.81	-0.83	634.276	3	M7(Oxidation); M12(Oxidation)	1	Brain
		WNGLIHELVNR	scaffold00193:+:35654-35686				-	40	2.48	1350.73	1	450.915	3		1	Brain
		LSHPFSHKPTIK	scaffold00193:+:36188-36223				-	32	3.88	1391.78	0.02	696.393	2		2	Brain
		FGTIPWSHTDSTISK	scaffold00193:+:36224-36268				-	53	4.72	1676.83	0.07	559.614	3		7	Brain
		GAVYEATEILR	scaffold00193:+:36794-36826				-	64	3.17	1221.65	0.06	611.327	2		4	Brain
		TmQAHGIKPPQLK	scaffold00193:+:36923-36961				-	-	3.77	1464.8	0.2	488.938	3	M2(Oxidation)	1	Brain
		TMQAHGIKPPQLK	scaffold00193:+:36923-36961				-	-	3.77	1464.8	0.2	488.938	3	M2(Oxidation)	1	Brain
IOB_NIMR_0132	Scaffold00233:19716-20900	GEFTPFFFNNYK	scaffold00233:+:19796-19831	Yes	novel gene		KB664784:-:72157-72192	53	-	1510.7	1.25	755.855	2		1	Malpighian tubules
		GEFTPFFFNNYKLPIK	scaffold00233:+:19796-19843				KB664784:-:72145-72192	35	4.34	1962.02	0.66	654.677	3		3	Testis; Malpighian tubules; Brain
		YSSLEAAAATR	scaffold00233:+:20033-20065				KB664784:-:71923-71955	73	3.52	1139.57	-0.35	570.288	2		2	Testis; Brain
		ELVNNFR	scaffold00233:+:20369-20389				KB664784:-:71599-71619	54	-	891.468	-0.3	446.238	2		1	Brain
IOB_NIMR_0133	Scaffold00569:532-3823	QHHITPDEVDQFAR	scaffold00569:+:1805-1846	Yes	Anotated	ASTE007478	KB665310:+:588046-588087	49	3.89	1692.81	1.63	564.942	3		1	Testis
		SRPADSATPAR	scaffold00569:+:1871-1903				KB665310:+:588112-588144	54	3.29	1128.58	1.35	564.792	2		2	Testis
IOB_NIMR_0134	scaffold01145:72-2823	lEVAQFPTGcVQADkPAQFMVR	scaffold01145:-:2196-2261	Yes	Annotated		KB664488:+:899137-899202	69	7.16	2769.4	-4.6	923.805	3	N-Term(iTRAQ4plex); C10(Methylthio); K15(iTRAQ4plex)	2	Ovary; Malpighian tubules; Midgut; Fatbody
		LEVAQFPTGcVQADKPAQFmVR	scaffold01145:-:2196-2261				KB664488:+:899137-899202	69	7.16	2769.4	-4.6	923.805	3	N-Term(iTRAQ4plex); C10(Methylthio); K15(iTRAQ4plex)	2	Ovary; Malpighian tubules; Midgut; Fatbody
		LEVAQFPTGcVQADKPAQFMVR	scaffold01145:-:2196-2261				KB664488:+:899137-899202	69	7.16	2769.4	-4.6	923.805	3	N-Term(iTRAQ4plex); C10(Methylthio); K15(iTRAQ4plex)	2	Ovary; Malpighian tubules; Midgut; Fatbody
		VYISPAmGEAHK	scaffold01145:-:2262-2297				KB664488:+:899101-899136	84	3.25	1318.64	-1.31	659.826	2	M7(Oxidation)	4	Fatbody; Male accessory glands
		VYISPAMGEAHK	scaffold01145:-:2262-2297				KB664488:+:899101-899136	84	3.25	1318.64	-1.31	659.826	2	M7(Oxidation)	4	Fatbody; Male accessory glands
		vYISPAmGEAHk	scaffold01145:-:2262-2297				KB664488:+:899101-899136	84	3.25	1318.64	-1.31	659.826	2	M7(Oxidation)	4	Fatbody; Male accessory glands
		YNQmHIVGSPFK	scaffold01145:-:1660-1695				KB664488:+:899703-899738	80	5.12	1436.7	1.1	718.854	2	M4(Oxidation)	10	Legs; Male accessory glands
		YNQMHIVGSPFK	scaffold01145:-:1660-1695				KB664488:+:899703-899738	80	5.12	1436.7	1.1	718.854	2	M4(Oxidation)	10	Legs; Male accessory glands
		YTPLLPGHYYMTIK	scaffold01145:-:1696-1737				KB664488:+:899661-899702	38	5.91	2001.08	0.45	667.697	3	N-Term(iTRAQ4plex); M11(Oxidation); K14(iTRAQ4plex)	1	Midgut
		yTPLLPGHYYmTIk	scaffold01145:-:1696-1737				KB664488:+:899661-899702	38	5.91	2001.08	0.45	667.697	3	N-Term(iTRAQ4plex); M11(Oxidation); K14(iTRAQ4plex)	1	Midgut
		yTPLLPGHYYMTIk	scaffold01145:-:1696-1737				KB664488:+:899661-899702	38	5.91	2001.08	0.45	667.697	3	N-Term(iTRAQ4plex); M11(Oxidation); K14(iTRAQ4plex)	1	Midgut
		YTPLLPGHYYmTIK	scaffold01145:-:1696-1737				KB664488:+:899661-899702	38	5.91	2001.08	0.45	667.697	3	N-Term(iTRAQ4plex); M11(Oxidation); K14(iTRAQ4plex)	1	Midgut
		VAMDcTEVEEGYKVR	scaffold01145:-:1738-1782				KB664488:+:899616-899660	129	4.2	1801.82	5.7	901.414	2	M3(Oxidation); C5(Carbamidomethyl)	2	Legs
		VAMDcTEVEEGYK	scaffold01145:-:1744-1782				KB664488:+:899616-899654	99	4.38	1530.66	7.05	765.832	2	C5(Carbamidomethyl)	27	Testis; Fatbody; Legs; Male accessory glands; Midgut; Ovary
		VAmDcTEVEEGYK	scaffold01145:-:1744-1782				KB664488:+:899616-899654	99	4.38	1530.66	7.05	765.832	2	C5(Carbamidomethyl)	27	Testis; Fatbody; Legs; Male accessory glands; Midgut; Ovary
		DDVDPAAVHASGK	scaffold01145:-:1885-1923				KB664488:+:899475-899513	68	3.31	1281.6	-1.86	641.306	2		7	Fatbody; Male accessory glands; Midgut; Ovary
		vGkDDVDPAAVHASGk	scaffold01145:-:1885-1932				KB664488:+:899466-899513	-	2.91	1998.09	-1.61	500.279	4	N-Term(iTRAQ4plex); K3(iTRAQ4plex); K16(iTRAQ4plex)	1	Midgut
		VGKDDVDPAAVHASGK	scaffold01145:-:1885-1932				KB664488:+:899466-899513	-	2.91	1998.09	-1.61	500.279	4	N-Term(iTRAQ4plex); K3(iTRAQ4plex); K16(iTRAQ4plex)	1	Midgut
		FNGVHIPGSPYR	scaffold01145:-:1939-1974				KB664488:+:899424-899459	60	4.66	1343.69	3.49	672.349	2		13	Testis; Legs; Male accessory glands; Midgut; Ovary
		fNGVHIPGSPYR	scaffold01145:-:1939-1974				KB664488:+:899424-899459	60	4.66	1343.69	3.49	672.349	2		13	Testis; Legs; Male accessory glands; Midgut; Ovary
		eNGIHAIHVk	scaffold01145:-:1975-2004				KB664488:+:899394-899423	31	4.3	1405.82	1.05	352.21	4	N-Term(iTRAQ4plex); K10(iTRAQ4plex)	1	Midgut
		ENGIHAIHVK	scaffold01145:-:1975-2004				KB664488:+:899394-899423	31	4.3	1405.82	1.05	352.21	4	N-Term(iTRAQ4plex); K10(iTRAQ4plex)	1	Midgut
IOB_NIMR_0135	scaffold02078:1-1989	HHHTDGAYFGTGFPHMLFMVHPEYRPK	scaffold02078:-:1786-1866	Yes	Annotated		KB664699:+:927678-927758	31	4.65	3209.52	5.55	642.709	5		1	Testis
IOB_NIMR_0136	scaffold02775:122-1898	SSLIQVYR	scaffold02775:+:131-154	Yes	novel gene		KB664288:+:2688406-2688429	68	2.26	965.541	-0.12	483.274	2		2	Brain; Testis
		cNLWGSNcR	scaffold02775:+:227-253				KB664288:+:2688502-2688528	43	2.99	1166.48	-1.73	583.744	2	C1(Carbamidomethyl); C8(Carbamidomethyl)	6	Testis
IOB_NIMR_0137	scaffold21227:1-281	LLcHVLDK	scaffold21227:+:128-151	Yes	novel gene		-	51	2.09	997.551	0.57	499.279	2	C3(Carbamidomethyl)	2	Testis; Male accessory glands
IOB_NIMR_0138	scaffold18454:30-563	QDASPDAPLQPVAQR	scaffold18454:+:426-470	Yes	novel gene		-	84	3.81	1592.8	0.45	796.905	2		1	Testis
IOB_NIMR_0139	scaffold12684:4-755	cRDPcPGTcGVGAR	scaffold12684:+:177-218	Yes	Annotated	ASTE003156	-	32	3.73	1562.66	-0.48	521.559	3	C1(Carbamidomethyl); C5(Carbamidomethyl); C9(Carbamidomethyl)	1	Testis
		cSVVNHNPIcScPER	scaffold12684:+:219-263				-	54	4.74	1828.78	-3.04	610.266	3	C1(Carbamidomethyl); C10(Carbamidomethyl); C12(Carbamidomethyl)	2	Salivary gland; Fatbody
IOB_NIMR_0140	scaffold07813:38-839	NHLNQTVGTTDLK	scaffold07813:-:179-217	Yes	Annotated	ASTE010562	-	96	4.84	1440.74	0.43	720.876	2		1	Brain
IOB_NIMR_0141	scaffold05080:649-1288	qNPLQATk	scaffold05080:-:1010-1033	Yes	Annotated	ASTE010054	KB664888:-:588094-588117	53	3.17	1187.7	-0.32	594.353	2	N-Term(iTRAQ4plex); K8(iTRAQ4plex)	1	Midgut
		QNPLQATK	scaffold05080:-:1010-1033				KB664888:-:588094-588117	53	3.17	1187.7	-0.32	594.353	2	N-Term(iTRAQ4plex); K8(iTRAQ4plex)	1	Midgut
		sIILQLkQNPLQATk	scaffold05080:-:1010-1054				KB664888:-:588094-588138	28	4.61	2127.32	-0.25	709.779	3	N-Term(iTRAQ4plex); K7(iTRAQ4plex); K15(iTRAQ4plex)	1	Midgut
		QFVAETDEIEPGTEWER	scaffold05080:-:1121-1171				KB664888:-:588205-588255	126	5.38	2035.93	2.84	1018.47	2		33	Brain; Salivary gland; Testis; Head; Male accessory glands; Midgut; Ovary; Proboscis
		qFVAETDEIEPGTEWER	scaffold05080:-:1121-1171				KB664888:-:588205-588255	126	5.38	2035.93	2.84	1018.47	2		33	Brain; Salivary gland; Testis; Head; Male accessory glands; Midgut; Ovary; Proboscis
IOB_NIMR_0142	scaffold04309:180-1305	NLQPMPDAGELDR	scaffold04309:+:1113-1151	Yes	novel gene		KB664442:+:239972-240010	61	2.64	1455.69	-1.84	728.347	2		2	Brain; Testis
		AVSSIAVSSHGGGSEK	scaffold04309:+:888-935				KB664442:+:239747-239794	69	5.05	1472.73	0.6	736.871	2		4	Brain
IOB_NIMR_0143	scaffold04224:2-427	IIVHGGPNLPVTEQTR	scaffold04224:-:164-211	Yes	novel gene		-	81	4.99	1730.95	-0.77	865.98	2		22	Testis; Male accessory glands
		RIIVHGGPNLPVTEQTR	scaffold04224:-:164-214				-	66	5.73	1887.06	3.4	629.692	3		5	Testis
		HAVSDILEELSDEEIRR	scaffold04224:-:215-265				-	26	5.27	2011.01	0.49	671.008	3		1	Testis
		VNTGGETNVR	scaffold04224:-:65-94				-	72	3.71	1046.52	0.77	523.765	2		8	Testis
		EYIDKSKPHGSHGLK	scaffold04224:-:95-139				-	45	4.57	1695.89	7.29	565.969	3		1	Testis
IOB_NIMR_0144	scaffold03268:698-1718	VDYSITEQPHAPTPGVYMGR	scaffold03268:+:732-791	Yes	3' protein extension	ASTE014045	-	59	5.49	2218.07	5.52	740.029	3		4	Testis
		VDYSITEQPHAPTPGVYmGR	scaffold03268:+:732-791				-	59	5.49	2218.07	5.52	740.029	3		4	Testis
IOB_NIMR_0145	scaffold00011:754100-755102	ENIPEFHEVR	scaffold00011:+:754456-754485	Yes	Annotated	ASTE001032	-	39	2.44	1269.62	-0.81	423.879	3		1	Testis
IOB_NIMR_0146	scaffold00012:2875829-2877277	LVLEQMRPEVR	scaffold00012:-:2876408-2876440	Yes	Annotated	ASTE006814	-	-	2.91	1369.76	-0.02	457.259	3		1	Testis
IOB_NIMR_0147	scaffold00013:149187-149959	TVVASPAISYAAPVAK	scaffold00013:-:149398-149445	Yes	Annotated	ASTE006830	-	92	3.85	1544.87	0.39	772.938	2		5	Antennae; Proboscis; Pupae; Testis
IOB_NIMR_0148	scaffold00005:924525-948177	GDADNVNHSDGIGQTNVR	scaffold00005:-:947088-947141	Yes	novel gene		KB664289:-:742431-742484	90	4.62	1868.85	0.04	934.928	2		2	Testis
		RPDTSQPGR	scaffold00005:-:947232-947258				KB664289:-:742575-742601	50	3.07	1013.51	0.23	507.26	2		1	Testis
IOB_NIMR_0149	scaffold00003:1610019-1611981	AYDVEPASADINDPYAR	scaffold00003:+:1610112-1610162	No	Annotated	ASTE009364	-	105	3.11	1866.85	-0.79	933.928	2		2	Midgut
		GYSVENQTLGLSYEQSK	scaffold00003:+:1611067-1611117				-	86	3.9	1902.91	-0.9	951.957	2		4	Larvae; Midgut
		TAGEIAAELGISQPMAEK	scaffold00003:+:1611262-1611315				-	59	4.09	1815.92	0.48	908.462	2		1	Larvae
		AIEAYesDFK	scaffold00003:+:1611349-1611378				-	54	2.31	1172.55	-1.25	586.776	2		3	Larvae; Midgut
		aIEAYesDFk	scaffold00003:+:1611349-1611378				-	54	2.31	1172.55	-1.25	586.776	2		3	Larvae; Midgut
		AYEMVGLLDWGANESK	scaffold00003:+:1611904-1611951				-	46	2.6	1782.84	0.77	891.923	2		1	Larvae
IOB_NIMR_0150	scaffold00003:3102495-3115518	EAPcWVNEEGAPFR	scaffold00003:-:3103380-3103421	Yes	protein extension	ASTE009174	-	68	2.81	1661.74	0.27	831.373	2	C4(Carbamidomethyl)	2	Midgut; Ovary
		VPVDAIPQGR	scaffold00003:-:3103608-3103637				KB665376:+:502629-502658	59	2.65	1051.59	-0.01	526.298	2		2	Testis; Midgut
		tAPTVPFFTAETHQYSR	scaffold00003:-:3103638-3103688				KB665376:+:502578-502628	34	4.97	2097.05	0.58	699.689	3	N-Term(iTRAQ4plex)	1	Midgut
		TAPTVPFFTAETHQYSR	scaffold00003:-:3103638-3103688				KB665376:+:502578-502628	34	4.97	2097.05	0.58	699.689	3	N-Term(iTRAQ4plex)	1	Midgut
		TIDHVLVTLGHYGVAVFR	scaffold00003:-:3103692-3103745				KB665376:+:502521-502574	48	4.84	1997.1	0.15	666.371	3		1	Midgut
IOB_NIMR_0151	scaffold00003:4537556-4538381	AIGLGEYVVK	scaffold00003:-:4537974-4538003	Yes	protein extension	ASTE011451	KB664574:+:285579-285608	47	1.97	1048.6	-0.08	524.805	2		3	Brain; Fatbody
		QSTETDPEKIEK	scaffold00003:-:4538004-4538039				KB664574:+:285543-285578	77	3.38	1404.69	1.05	702.847	2		2	Midgut
IOB_NIMR_0152	scaffold00003:523540-525515	LLSEEAYR	scaffold00003:-:524530-524553	Yes	protein extension	ASTE008938	-	55	-	980.504	-0.34	490.756	2		1	Ovary
		SISFEVGKFDR	scaffold00003:-:524797-524829				KB664428:-:588005-588037	56	2.84	1284.66	2.59	642.834	2		1	Ovary
		IcLVGLAK	scaffold00003:-:524860-524883				KB664428:-:588068-588091	49	2.4	873.518	-5.37	437.263	2	C2(Carbamidomethyl)	2	Ovary; Proboscis
IOB_NIMR_0153	scaffold00006:1940270-1941976	LNSPDLELEDFVR	scaffold00006:-:1940678-1940716	Yes	protein extension	ASTE014717	-	100	1.96	1546.78	3.31	773.894	2		2	Ovary; Salivary gland
		lNSPDLELEDFVR	scaffold00006:-:1940678-1940716				-	100	1.96	1546.78	3.31	773.894	2		2	Ovary; Salivary gland
		GLLPENVVTDQLR	scaffold00006:-:1940732-1940770				-	57	1.23	1453.8	-0.87	727.404	2		1	Salivary gland
IOB_NIMR_0154	scaffold00006:1950264-1951890	AVWWcEWVLR	scaffold00006:-:1950444-1950473	No	Annotated	ASTE006325-PA	KB664288:+:788835-788864	53	2.24	1404.69	-0.21	702.848	2	C5(Carbamidomethyl)	5	Malpighian tubules; Salivary gland
		nGFILFSLGSNAR	scaffold00006:-:1950927-1950965				KB664288:+:788343-788381	54	3.13	1539.85	3.7	770.427	2	N-Term(iTRAQ4plex)	1	Midgut
		VSFSNVNPIIQYK	scaffold00006:-:1951065-1951103				KB664288:+:788205-788243	100	5.16	1508.81	-1.03	754.908	2		15	Malpighian tubules; Testis; Antennae; Fatbody; Midgut
		vSFSNVNPIIQYk	scaffold00006:-:1951065-1951103				KB664288:+:788205-788243	100	5.16	1508.81	-1.03	754.908	2		15	Malpighian tubules; Testis; Antennae; Fatbody; Midgut
		KLYPDAPSSTTFYK	scaffold00006:-:1951113-1951154				KB664288:+:788154-788195	96	5.65	1617.81	-0.81	809.411	2		11	Testis; Antennae; Malpighian tubules; Midgut
		kLYPDAPSSTTFYk	scaffold00006:-:1951113-1951154				KB664288:+:788154-788195	96	5.65	1617.81	-0.81	809.411	2		11	Testis; Antennae; Malpighian tubules; Midgut
		LFDEFGLNLcEAAIK	scaffold00006:-:1951485-1951529				KB664288:+:787779-787823	84	3.93	1739.87	-0.5	870.437	2	C10(Carbamidomethyl)	5	Antennae; Malpighian tubules; Midgut
IOB_NIMR_0155		HTQLLVAVER	scaffold00006:-:2909282-2909311	No	Annotated	ASTE009696-PA	-	53	3.36	1165.67	1.92	583.339	2		4	Malpighian tubules; Midgut; Ovary; Proboscis
		QFISPQTGEVLSYR	scaffold00006:-:2909336-2909377				-	133	4.4	1624.84	2.59	812.922	2		12	Brain; Testis; Fatbody; Malpighian tubules; Midgut; Ovary; Salivary gland
		qFISPQTGEVLSYR	scaffold00006:-:2909336-2909377				-	133	4.4	1624.84	2.59	812.922	2		12	Brain; Testis; Fatbody; Malpighian tubules; Midgut; Ovary; Salivary gland
		dEYLVLDHNNIDLLk	scaffold00006:-:2909378-2909422				-	54	6.38	2102.13	-4.74	701.381	3	N-Term(iTRAQ4plex); K15(iTRAQ4plex)	1	Ovary; Malpighian tubules; Midgut; Fatbody
		DEYLVLDHNNIDLLK	scaffold00006:-:2909378-2909422				-	54	6.38	2102.13	-4.74	701.381	3	N-Term(iTRAQ4plex); K15(iTRAQ4plex)	1	Ovary; Malpighian tubules; Midgut; Fatbody
		ISTGNPcPIcRDEYLVLDHNNIDLLK	scaffold00006:-:2909378-2909455				-	-	2.92	3069.52	2.7	768.136	4	C7(Carbamidomethyl); C10(Carbamidomethyl)	1	Midgut
		ISTGNPcPIcR	scaffold00006:-:2909423-2909455				-	71	3.44	1274.6	0.39	637.803	2	C7(Carbamidomethyl); C10(Carbamidomethyl)	11	Salivary gland; Testis; Fatbody; Midgut; Ovary
		QTYQDDPVWK	scaffold00006:-:2909528-2909557				-	46	2.72	1279.6	1.34	640.302	2		6	Testis; Midgut; Salivary gland
IOB_NIMR_0156	scaffold00005:213093-213980	IDREALTK	scaffold00005:+:213593-213616	Yes	protein extension	ASTE004427	KB665365:-:135418-135441	-	2.94	945.536	0	473.272	2		1	Antennae
		LFTVNDDcNK	scaffold00005:+:213836-213865				KB665365:-:135169-135198	67	3.11	1225.55	-4.69	613.277	2	C8(Carbamidomethyl)	15	Antennae; Maxillary palps; Proboscis
		LFTVNDDcNKLK	scaffold00005:+:213836-213871				KB665365:-:135163-135198	69	5.17	1466.73	-0.98	733.868	2	C8(Carbamidomethyl)	10	Antennae
IOB_NIMR_0157	scaffold00004:44208-46431	VTTLLATLNAFDAGLKK	scaffold00004:+:44718-44768	Yes	Annotated	ASTEI010556	KB664448:+:43759-43809	50	4.87	1776.03	-0.38	592.68	3		3	Testis
		LDQTIQSIASK	scaffold00004:+:45557-45589				KB664448:+:44597-44629	79	3.83	1203.66	2.35	602.334	2		5	Testis
IOB_NIMR_0158	scaffold00005:3536737-3539901	NFRPWDQTYR	scaffold00005:+:3539518-3539547	Yes	exon extension	ASTEI001745	KB664599:-:738474-738503	39	3.26	1382.66	0.11	691.834	2		2	Antennae
IOB_NIMR_0159	scaffold00007:1293126-1294941	RTVDYTADPVNGFNAVVSK	scaffold00007:-:1293881-1293937	Yes	Annotated		-	101	6.68	2053.04	3.08	1027.02	2		6	Antennae; Legs; Maxillary palps; Proboscis
		DGDVVQGQYSLVEPDGTR	scaffold00007:-:1293939-1293967
IOB_NIMR_0160	scaffold00008:2926386-2927381	TSDGSQATSNVVR	scaffold00008:-:2926736-2926774	Yes	Annotated	ASTE009757	-	108	4.37	1321.63	-1	661.32	2		6	Head; Larvae; Midgut; Salivary gland
IOB_NIMR_0161	scaffold00008:399605-400593	SSYTSSNSTAVATR	scaffold00008:-:399910-399951	Yes	novel gene		-	94	2.17	1431.67	-0.34	716.339	2		3	Proboscis; Salivary gland
		TSSRPTEAAAGEGDEASGHR	scaffold00008:-:400213-400272				-	82	8.04	1985.89	0.36	662.635	3		6	Salivary gland; Testis; Proboscis
IOB_NIMR_0162	scaffold00017:439211-460056	FGVDLWEFGR	scaffold00017:+:449419-449448	Yes	novel gene	NA	-	71	3.42	1225.6	0.24	613.304	2		19	Brain; Head; Male accessory glands; Salivary gland
		FKDSDVDVTR	scaffold00017:+:459949-459978				-	60	3.22	1181.58	0.32	591.294	2		3	Brain
		KDGILLLR	scaffold00017:+:459979-460002				-	39	2.8	927.602	3.74	464.305	2		1	Brain
IOB_NIMR_0163	scaffold00019:1321950-1322777	GISLLEVIDLPANNK	scaffold00019:-:1322004-1322048	Yes	Annotated	ASTE004267	KB664643:+:42380-42424	66	3.55	1595.9	1.11	798.455	2		3	Malpighian tubules; Ovary; Salivary gland
		LLEISSGVGLHAPYFAK	scaffold00019:-:1322469-1322519				KB664643:+:41909-41959	83	6.09	1802	9.15	901.504	2		4	Testis; Legs
IOB_NIMR_0164	scaffold00008:3721467-3722492	QHPESLWSAFEVVEEK	scaffold00008:+:3721688-3721735	Yes	novel gene	not annotated	-	50	6.38	1914.92	-1.21	638.979	3		2	Testis
		QPFPcPAGR	scaffold00008:+:3721778-3721804				-	-	2.92	1029.49	-5.63	515.247	2	C5(Carbamidomethyl)	1	Testis
		LLLWITGPDAGGSHR	scaffold00008:+:3722135-3722179				-	71	4.95	1592.86	2.63	531.624	3		7	Testis
		QHYTMEAGR	scaffold00008:+:3722180-3722206				-	57	4.25	1092.49	3.02	364.836	3		4	Testis
		QHYTmEAGR	scaffold00008:+:3722180-3722206				-	57	4.25	1092.49	3.02	364.836	3		4	Testis
IOB_NIMR_0165	scaffold00008:648969-652534	ILIPVTSVGPTVEVASGK	scaffold00008:+:651542-651595	Yes	protein extension	ASTE010318	KB664655:-:1186488-1186541	76	3.83	1767.02	-1.95	884.015	2		3	Midgut; Ovary
IOB_NIMR_0166	scaffold00014:2764210-2765796	TSDTSAITESR	scaffold00014:+:2764774-2764806	No	Annotated	ASTE003291	-	70	4.04	1167.55	-1.84	584.277	2		1	Brain
		KVEFEEHQLK	scaffold00014:+:2765635-2765664				-	35	3.6	1286.67	-0.02	429.563	3		1	Brain
IOB_NIMR_0167	Scaffold00014:375670-376200	RTLAALVPPNPNLTVFDR	scaffold00014:+:375946-375999	No	novel gene	-	-	38	5.19	1994.12	2.04	665.379	3		2	Testis
		DRTDLLLQLPEFR	scaffold00014:+:376063-376101				-	88	3.64	1615.88	1.8	808.445	2		3	Testis
		TDLLLQLPEFR	scaffold00014:+:376069-376101				-	57	3.41	1344.75	-0.09	672.88	2		1	Testis
		SFSQLTNPTEHYLQLHR	scaffold00014:+:376117-376167				-	103	5.9	2071.07	17.15	691.029	3		9	Testis
IOB_NIMR_0168	scaffold00016:2310323-2312934	NPAAGGSPAATTKPTPEK	scaffold00016:+:2311511-2311564	Yes	protein extension	ASTE003735	KB664450:+:274472-274525	121	5.87	1694.87	-0.06	847.939	2		10	Brain; Testis; Antennae; Fatbody; Male accessory glands
		NPAAGGSPAATTKPTPEKK	scaffold00016:+:2311511-2311567				KB664450:+:274472-274528	65	5.8	1822.97	-0.03	608.327	3		3	Male accessory glands; Ovary
		TSEATQNDKSEPAPK	scaffold00016:+:2311685-2311729				KB664450:+:274646-274690	91	5.26	1602.76	-0.29	801.884	2		2	Ovary
IOB_NIMR_0169	scaffold00010:1080966-1084466	NQLSLIAHTVQYTSR	scaffold00010:+:1081238-1081282	Yes	novel gene		KB664477:-:716794-716838	67	-	1730.92	0.24	865.963	2		1	Proboscis
		NIQQAPFYTGNTVDAR	scaffold00010:+:1081283-1081330				KB664477:-:716746-716793	82	3.92	1794.88	0.75	897.943	2		2	Proboscis
		LAELNQTLAQVQTENK	scaffold00010:+:1081628-1081675				KB664477:-:716401-716448	119	5.08	1799.95	1.17	900.48	2		3	Fatbody; Proboscis
IOB_NIMR_0170	scaffold00011:1011846-1013042	DELHQDVGDHVLNLQIR	scaffold00011:-:1011918-1011968	No	annotated	ASTE002563	-	65	6.96	2001.01	-2.52	667.675	3		4	Testis
		GINGIFNIHLEPGTQcGSEVR	scaffold00011:-:1011990-1012052				-	41	5.26	2298.13	-0.73	766.714	3	C16(Carbamidomethyl)	1	Testis
		QEFQSESGK	scaffold00011:-:1012350-1012376				-	-	3.13	1039.47	-0.19	520.238	2		2	Testis
		DEAGIcSIcHGTGK	scaffold00011:-:1012377-1012418				-	78	3.68	1504.65	-0.28	752.829	2	C6(Carbamidomethyl); C9(Carbamidomethyl)	6	Testis
		cLFTGSQSVR	scaffold00011:-:1012419-1012448				-	85	2.84	1154.56	2.21	577.786	2	C1(Carbamidomethyl)	3	Testis
		ESIEGTVR	scaffold00011:-:1012485-1012508				-	66	2.33	890.46	2.79	445.734	2		4	Testis
		STQIQQDGAPGATADTAAmELK	scaffold00011:-:1012719-1012784				-	56	3.26	2220.05	2.96	1110.53	2	M19(Oxidation)	2	Testis
		STQIQQDGAPGATADTAAMELK	scaffold00011:-:1012719-1012784				-	56	3.26	2220.05	2.96	1110.53	2	M19(Oxidation)	2	Testis
		SPPTVKPPK	scaffold00011:-:1012881-1012907				-	65	2.91	950.57	2.73	317.528	3		4	Testis
IOB_NIMR_0171	scaffold00011:1362628-1366967	QGFGGGHGAHGHGGK	scaffold00011:-:1365208-1365252	Yes	protein extension	ASTE010490	KB664844:+:911788-911832	70	3.94	1360.63	0.35	680.817	2		2	Testis
		QGFGGDHHGGGFQGGK	scaffold00011:-:1365301-1365348				KB664844:+:911740-911787	121	6.87	1542.69	4.47	771.849	2		20	Brain; Testis; Fatbody; Male accessory glands
IOB_NIMR_0172	scaffold00020:1146547-1147449	VGTGPTGGIQPGQEAPVTSA	scaffold00020:-:1146850-1146909	Yes	protein extension	ASTE005258	KB664522:+:1088813-1088872	32	-	1823.94	14.67	912.474	2		1	Legs
		YYSENNGLDGYK	scaffold00020:-:1147183-1147218				KB664522:+:1088504-1088539	101	2.87	1422.62	3.36	711.815	2		7	Testis; Fatbody; Maxillary palps; Midgut; Proboscis
IOB_NIMR_0173	scaffold00024:1646695-1647775	VGHAHHPQVYGGHHY	scaffold00024:-:1647237-1647281	Yes	Annotated	ASTE014641	-	38	5.87	1695.79	0.99	424.703	4		1	Proboscis
		KVGHAHHPQVYGGHHY	scaffold00024:-:1647237-1647284				-	23	4.78	1823.88	-2.63	456.725	4		1	Proboscis
		GQYSLHEADGTER	scaffold00024:-:1647336-1647374				-	60	3.4	1462.66	0.53	731.832	2		3	Antennae; Fatbody; Proboscis
IOB_NIMR_0174	scaffold00016:54575-55688	SESFYPYYAScFTR	scaffold00016:+:54729-54770	Yes	novel	-	-	-	1.49	1777.74	-9.79	889.371	2	C11(Carbamidomethyl)	1	Midgut
IOB_NIMR_0175	scaffold00022:744253-744555	VPVLGNILNMPGISR	scaffold00022:-:744295-744339	Yes	Annotated	ASTE010014	KB664435:+:364642-364686	67	4.85	1724	-3.18	862.501	2	N-Term(iTRAQ4plex)	2	Ovary; Malpighian tubules; Midgut; Fatbody
		RVPVLGNILNmPGISR	scaffold00022:-:744295-744342				KB664435:+:364639-364686	79	3.34	1752	0.34	584.67	3	M11(Oxidation)	1	Testis
		TVDWLAGESDRTTV	scaffold00022:-:744253-744294				KB664435:+:364687-364728	50	2.7	1549.75	-2.39	775.376	2		4	Maxillary palps; Midgut; Proboscis
		TVDWLAGESDR	scaffold00022:-:744262-744294				KB664435:+:364687-364719	85	3.3	1248.59	-0.26	624.796	2		14	Brain; Testis; Larvae; Male accessory glands; Maxillary palps; Midgut; Ovary; Proboscis; Salivary gland
		tFRFFFQk	scaffold00022:-:744487-744510				KB664435:+:364471-364494	16	-	1408.8	-0.4	470.271	3	N-Term(iTRAQ4plex); K8(iTRAQ4plex)	1	Midgut
IOB_NIMR_0176	scaffold00028:1,970,529-1,972,751	LGTLYSETQDLSSPVHR	scaffold00028:+:1971288-1971338	Yes	protein extension	ASTE007407	-	65	2.28	1902.96	0.56	634.99	3		1	Testis
		APASASAATTTSR	scaffold00028:+:1971825-1971863				-	73	4.27	1191.6	-0.6	596.302	2		2	Testis; Ovary
		NTTQVDQAEEAKK	scaffold00028:+:1971870-1971908				-	91	3.81	1461.72	1.02	731.363	2		2	Testis
IOB_NIMR_0177	scaffold00028:704,511-705,392	APSDEEVDTYVR	scaffold00028:+:704894-704929	Yes	Annotated	ASTE004764	KB664434:+:66618-66653	63	2.82	1380.63	-1.39	690.817	2		2	Midgut; Ovary
IOB_NIMR_0178	scaffold00042:741144-742383	SEMILTAAK	scaffold00042:+:741384-741410	Yes	novel gene		KB664443:-:53995-54021	53	2.64	963.518	0.5	482.263	2		3	Fatbody; Salivary gland; Testis
IOB_NIMR_0179	scaffold00061:1-285	FPSLScQDAPADDGQSVASGATQASDEK	scaffold00061:+:199-282	No	protein extension	ASTE005760	-	55	3.77	2839.23	0.14	947.082	3	C6(Carbamidomethyl)	1	Head
IOB_NIMR_0180	scaffold00061:488129-490195	TcVPDMSETVLcAQLAEETLGGK	scaffold00061:+:489939-490007	Yes	protein extension	ASTE006033	KB664733:-:969865-969933	124	6.43	2525.16	0.23	1263.08	2	C2(Carbamidomethyl); M6(Oxidation); C12(Carbamidomethyl)	42	Midgut
		TcVPDMSETVLcAQLAEETLGGKVEVcK	scaffold00061:+:489939-490022				KB664733:-:969850-969933	71	5.19	3124.47	-0.26	1042.16	3	C2(Carbamidomethyl); C12(Carbamidomethyl); C27(Carbamidomethyl)	6	Midgut
IOB_NIMR_0181	scaffold00062:167416-168104	ATYASIGLLILYFSLKPSKK	scaffold00062:-:167618-167677	Yes	protein extension	ASTE006083	KB664442:+:62020-62079	42	6.92	2213.3	0.32	738.437	3		4	Thorax; Antennae
		ATYASIGLLILYFSLKPSK	scaffold00062:-:167621-167677				KB664442:+:62020-62076	63	7.98	2085.2	-0.24	695.738	3		2	Thorax; Antennae
		ANVAKATYASIGLLILYFSLKPSK	scaffold00062:-:167623-167686
			scaffold00062:-:167780-167787
IOB_NIMR_0182	scaffold00062:923231-923680	gFDMITDAVFESHNk	scaffold00062:-:923414-923458	Yes	protein extension	ASTE014405	KB664444:-:876434-876478	103	8.47	1998.98	-2.42	999.993	2	N-Term(iTRAQ4plex); K15(iTRAQ4plex)	13	Ovary; Malpighian tubules; Midgut; Fatbody
		GFDmITDAVFESHNK	scaffold00062:-:923414-923458				KB664444:-:876434-876478	103	8.47	1998.98	-2.42	999.993	2	N-Term(iTRAQ4plex); K15(iTRAQ4plex)	13	Ovary; Malpighian tubules; Midgut; Fatbody
		gFDmITDAVFESHNk	scaffold00062:-:923414-923458				KB664444:-:876434-876478	103	8.47	1998.98	-2.42	999.993	2	N-Term(iTRAQ4plex); K15(iTRAQ4plex)	13	Ovary; Malpighian tubules; Midgut; Fatbody
		GFDMITDAVFESHNK	scaffold00062:-:923414-923458				KB664444:-:876434-876478	103	8.47	1998.98	-2.42	999.993	2	N-Term(iTRAQ4plex); K15(iTRAQ4plex)	13	Ovary; Malpighian tubules; Midgut; Fatbody
		lLNNLLLkR	scaffold00062:-:923510-923536				-	43	3.79	1384.92	-1.96	692.964	2	N-Term(iTRAQ4plex); K8(iTRAQ4plex)	3	Ovary; Malpighian tubules; Midgut; Fatbody
		LLNNLLLKR	scaffold00062:-:923510-923536				-	43	3.79	1384.92	-1.96	692.964	2	N-Term(iTRAQ4plex); K8(iTRAQ4plex)	3	Ovary; Malpighian tubules; Midgut; Fatbody
		GKLWKDIK	scaffold00062:-:923300-923318
			scaffold00062:-:923411-923415
IOB_NIMR_0183	scaffold00029:735,290-737,445	LDDDTYVK	scaffold00029:+:736310-736333	Yes	Annotated	ASTE003054	KB664429:+:522920-522943	-	1.16	968.456	-0.89	484.732	2		1	Salivary gland
		YGPYALGGGYVLSK	scaffold00029:+:736514-736555				KB664429:+:523130-523171	91	3.36	1444.75	0.67	722.878	2		3	Testis; Salivary gland
		SEDIAVGTWLAPFR	scaffold00029:+:736607-736648				KB664429:+:523223-523264	90	3.17	1561.81	5.13	781.408	2		4	Male accessory glands; Salivary gland
		DLYAGEMcTHEEDKPTGALPR	scaffold00029:+:736754-736816				KB664429:+:523370-523432	32	1.61	2390.07	-0.74	797.363	3	C8(Carbamidomethyl)	1	Salivary gland
IOB_NIMR_0184	scaffold00062:799820-804382	DPTENDNPIQAVSDLENLLSIK	scaffold00062:+:800419-800484	Yes	protein extension	ASTE003636	-	104	6.1	2425.22	2.67	1213.11	2		1	Brain
		GLASLQGPQGSFGSLR	scaffold00062:+:800952-800999				KB664444:+:722404-722451	101	4.43	1574.83	1.74	787.919	2		3	Brain; Haemolymph
		LAAPIGLGISPVEELEPR	scaffold00062:+:801351-801404				KB664444:+:722803-722856	98	5.46	1861.04	0.9	931.026	2		3	Haemolymph; Proboscis
		NPPGNQLIAPLGVDELLVEDGEHYLYWYK	scaffold00062:+:801835-801868
IOB_NIMR_0185	scaffold00062:697320-699941	DAEEAPEGGDEGEEQPMDQTVDGDEEPKK	scaffold00062:-:697972-698058	Yes	protein extension	ASTE003622	KB664444:-:574525-574611	80	5.75	3131.28	-0.1	1566.14	2		6	Midgut; Ovary
		DAEEAPEGGDEGEEQPmDQTVDGDEEPKK	scaffold00062:-:697972-698058				KB664444:-:574525-574611	80	5.75	3131.28	-0.1	1566.14	2		6	Midgut; Ovary
		dAEEAPEGGDEGEEQPMDQTVDGDEEPk	scaffold00062:-:697975-698058				KB664444:-:574528-574611	80	5.88	3291.39	2.17	1097.8	3	N-Term(iTRAQ4plex); K28(iTRAQ4plex)	1	Ovary; Malpighian tubules; Midgut; Fatbody
		DAEEAPEGGDEGEEQPMDQTVDGDEEPK	scaffold00062:-:697975-698058				KB664444:-:574528-574611	80	5.88	3291.39	2.17	1097.8	3	N-Term(iTRAQ4plex); K28(iTRAQ4plex)	1	Ovary; Malpighian tubules; Midgut; Fatbody
		LSIGDTTTADDSMAAAGEGEK	scaffold00062:-:698086-698148				KB664444:-:574639-574701	191	6.96	2039.91	0.61	1020.46	2		8	Fatbody; Midgut; Ovary; Salivary gland
		lSIGDTTTADDSmAAAGEGEk	scaffold00062:-:698086-698148				KB664444:-:574639-574701	191	6.96	2039.91	0.61	1020.46	2		8	Fatbody; Midgut; Ovary; Salivary gland
		LSIGDTTTADDSmAAAGEGEK	scaffold00062:-:698086-698148				KB664444:-:574639-574701	191	6.96	2039.91	0.61	1020.46	2		8	Fatbody; Midgut; Ovary; Salivary gland
		KLSIGDTTTADDSMAAAGEGEK	scaffold00062:-:698086-698151				KB664444:-:574639-574704	172	7.47	2168	-2.8	1084.5	2		10	Fatbody; Ovary; Salivary gland
		kLSIGDTTTADDSMAAAGEGEk	scaffold00062:-:698086-698151				KB664444:-:574639-574704	172	7.47	2168	-2.8	1084.5	2		10	Fatbody; Ovary; Salivary gland
		KLSIGDTTTADDSmAAAGEGEK	scaffold00062:-:698086-698151				KB664444:-:574639-574704	172	7.47	2168	-2.8	1084.5	2		10	Fatbody; Ovary; Salivary gland
		YGKPNENTPKDWLNSYTDFNR	scaffold00062:-:698224-698286				KB664444:-:574777-574839	75	6.11	2559.19	1.06	1280.1	2		2	Ovary
		YEDGIEIDQEIVIMTTK	scaffold00062:-:698470-698520				KB664444:-:575023-575073	78	3.87	1996.98	0.06	998.993	2		3	Ovary
		DSSVNAVcYGAK	scaffold00062:-:698545-698580				KB664444:-:575098-575133	62	3.36	1270.58	2.41	635.792	2	C8(Carbamidomethyl)	9	Testis; Midgut; Ovary; Salivary gland
		SGIQSEK	scaffold00062:-:698716-698736				KB664444:-:575269-575289	57	-	748.384	0.9	374.696	2		1	Testis
		QEPDAEIENLGELQK	scaffold00062:-:699391-699435				KB664444:-:575944-575988	89	4.83	1712.83	0.55	856.921	2		9	Testis; Fatbody; Midgut; Ovary
IOB_NIMR_0186	scaffold00026:1143288-1145367	HSLEQSDDGEGVEVIENK	scaffold00026:+:1143685-1143738	Yes	Annotated	ASTE003981	-	101	5.29	1984.9	-2.66	992.956	2		6	Testis; Midgut; Ovary
		LPYWLQAVcPK	scaffold00026:+:1143880-1143912				-	-	2.49	1651.9	1.17	551.304	3	N-Term(iTRAQ4plex); C9(Methylthio); K11(iTRAQ4plex)	1	Ovary; Malpighian tubules; Midgut; Fatbody
		IVDHVDIAFEEPSEK	scaffold00026:+:1144296-1144340				-	77	5.48	1727.85	2.37	864.43	2		11	Brain; Testis; Antennae; Legs; Ovary; Midgut
		ICMPLTVEEYK	scaffold00026:+:1143539-1143565
		ICMPLTVEEYK	scaffold00026:+:1143539-1143565
IOB_NIMR_0187	scaffold00088:5646-18459	SGPGHFDQTSVGIR	scaffold00088:+:14655-14696	Yes	novel exon	ASTE009254	KB664577:+:1177585-1177626	65	3.78	1457.73	8.42	729.366	2		2	Salivary gland
		EDQNILTLK	scaffold00088:+:16514-16540				KB664577:+:1179439-1179465	50	-	1073.58	0.37	537.296	2		1	Salivary gland
		NLNTMTFDDNLR	scaffold00088:+:16985-17020				KB664577:+:1179910-1179945	86	1.74	1453.68	1.21	727.342	2		1	Salivary gland
		YGTESYHVLFK	scaffold00088:+:17057-17089				KB664577:+:1179982-1180014	39	1.54	1343.67	1.7	672.336	2		1	Salivary gland
		RPITLTEFENLPFVR	scaffold00088:+:17574-17618				KB664577:+:1180499-1180543	76	5.75	1832.01	2.03	916.509	2		5	Proboscis; Salivary gland
		MQSEIQDEWER	scaffold00088:+:16331-16348
			scaffold00088:+:16439-16453
			scaffold00088:+:18296-18319
IOB_NIMR_0188	scaffold00027:1162533-1166731	aTYNNAHWLLSHIR	scaffold00027:+:1163183-1163224	Yes	exon extension	ASTE002206	KB665032:-:584098-584139	42	-	1737.88	-3.59	579.963	3	N-Term(Acetyl)	1	Brain
		VFVPALPEEQR	scaffold00027:+:1163849-1163881				KB665032:-:583441-583473	80	2.41	1284.69	-2.17	642.85	2		4	Brain; Midgut
IOB_NIMR_0189	scaffold00026:86821-87039	YSPFENPPAK	scaffold00026:+:86980-87009	No	Annotated	ASTE003833	-	51	2.16	1149.55	-3.18	575.281	2		2	Brain
IOB_NIMR_0190	scaffold00028:910846-911100	YIGTGHADTTK	scaffold00028:-:911017-911049	No	Annotated	ASTE007342	-	66	2.91	1163.57	1.03	582.289	2		2	Legs; Testis
IOB_NIMR_0191	scaffold00090:182852-184570	TINDLIWR	scaffold00090:+:183073-183096	Yes	novel gene		-	-	2.25	1030.57	0.11	515.788	2		2	Testis
		WFESGTQQDVDTAK	scaffold00090:+:183307-183348				-	97	3.85	1611.74	8.91	806.375	2		2	Testis
IOB_NIMR_0192	scaffold00092:516,876-517,240	SLTVTTISR	scaffold00092:-:516945-516971	No	novel gene		-	-	2.74	977.567	4.23	489.287	2		3	Testis
		KPQMYIPmSTR	scaffold00092:-:516987-517019				-	54	2.8	1367.69	4.02	684.347	2	M8(Oxidation)	2	Testis
		KPQMYIPMSTR	scaffold00092:-:516987-517019				-	54	2.8	1367.69	4.02	684.347	2	M8(Oxidation)	2	Testis
		RNFGSQSGANEK	scaffold00092:-:517020-517055				-	81	4.02	1294.62	1.46	647.811	2		2	Testis
		LDKDGTVPR	scaffold00092:-:517056-517082				-	54	-	1000.54	-0.14	500.775	2		2	Testis
IOB_NIMR_0193	scaffold00092:557757-560289	NAIDADPHLR	scaffold00092:+:557916-557945	Yes	Annotated	ASTE015016	-	54	4.02	1121.57	1.65	561.289	2		8	Testis
		TAESASNPPASSLPDGSANAPATR	scaffold00092:+:558054-558125				-	104	5.2	2269.07	-0.04	1135.04	2		2	Testis
		EPYTPVQQR	scaffold00092:+:558564-558590				-	51	2.26	1117.57	1.83	559.287	2		2	Testis
		SVSAVADPPYAPK	scaffold00092:+:558693-558731				-	85	4.17	1301.67	-3.86	651.338	2		8	Testis
		RVTFAWTDVDR	scaffold00092:+:558738-558770				-	53	4.22	1365.69	-1.49	683.348	2		2	Testis
		VTFAWTDVDR	scaffold00092:+:558741-558770				-	60	3.32	1209.59	3	605.3	2		11	Testis
IOB_NIMR_0194	scaffold00094:575538-578184	ScDPSASEPQK	scaffold00094:-:575870-575902	Yes	novel exons	ASTE002961	KB665254:+:623945-623977	47	1.83	1205.51	0.77	603.259	2	C2(Carbamidomethyl)	1	Testis
		QHITTTEPVQEPEIR	scaffold00094:-:575954-575998				KB665254:+:623849-623893	56	3.2	1777.91	3.27	593.309	3		1	Testis
				Yes	novel gene
IOB_NIMR_0195	scaffold00071:70392-72459	QTSVDIPIDTNSLQR	scaffold00071:+:71837-71881				KB664416:+:307292-307336	35	1.96	1686.86	-4.63	843.933	2		5	Ovary; Male accessory glands
IOB_NIMR_0196	scaffold00173:59096-59808	IIAAQPAYYHQPAPAVVK	scaffold00173:-:59286-59339	Yes	novel gene		-	49	5.12	1937.07	0.42	646.36	3		14	Antennae; Head; Maxillary palps; Proboscis; Pupae
		VIAQPAIAK	scaffold00173:-:59361-59387				-	52	2.14	910.57	-1.89	455.789	2		5	Antennae; Head; Proboscis
		IPQPIVQK	scaffold00173:-:59388-59411				-	39	2.94	922.573	0.59	461.79	2		2	Head; Proboscis
		HGDQVHGQYSLIDSDGHKR	scaffold00173:-:59484-59540				-	34	5.31	2149.02	1.23	538.01	4		1	Proboscis
		TIAQPTLVK	scaffold00173:-:59634-59660				-	-	2.32	970.591	-1.78	485.799	2		2	Antennae; Proboscis
IOB_NIMR_0197	scaffold00173:60967-62315	TGFNAEQR	scaffold00173:-:61826-61849	Yes	Annotated		KB664624:+:117615-117638	59	3.29	922.439	1.89	461.723	2		46	Antennae; Head
IOB_NIMR_0198	scaffold00050:1025971-1026543	VSSALDYVHGK	scaffold00050:+:1026150-1026182	Yes	Annotated	ASTE010116	-	64	3.92	1175.61	4.54	588.309	2		16	Testis
		ILANVIPFYADEAQQQLAFK	scaffold00050:+:1026258-1026317				-	79	5.62	2279.21	2.64	760.409	3		9	Testis
IOB_NIMR_0199	scaffold00050:1026979-1027975	YSKPTEASIIER	scaffold00050:+:1027138-1027173	Yes	novel gene		-	68	5.34	1393.73	0.35	697.37	2		8	Testis
		NLSTSPLDAPEGSSHESHVQQEK	scaffold00050:+:1027240-1027308				-	58	6.24	2477.16	2.97	826.392	3		7	Testis
IOB_NIMR_0200	scaffold00180:9191-9439	RLTSYDWENQFESFQDATR	scaffold00180:+:9257-9313	Yes	novel gene		-	100	8.58	2393.09	5.22	1197.05	2		15	Antennae; Legs; Maxillary palps; Proboscis
		LTSYDWENQFESFQDATR	scaffold00180:+:9260-9313				-	103	5.71	2236.99	4.73	1119	2		20	Antennae; Fatbody; Legs; Maxillary palps; Proboscis
IOB_NIMR_0201	scaffold00187:70823-73279	AVSASTATGTK	scaffold00187:-:71275-71307	Yes	Novel		-	91	2.81	993.52	-0.73	497.264	2		5	Testis
IOB_NIMR_0202	scaffold00220:37385-37652	IVGGSTVKEmEIK	scaffold00220:+:37603-37641	Yes	novel gene		-	46	3.16	1406.75	-1.66	469.589	3	M10(Oxidation)	2	Midgut
		IVGGSTVKEMEIK	scaffold00220:+:37603-37641				-	46	3.16	1406.75	-1.66	469.589	3	M10(Oxidation)	2	Midgut
IOB_NIMR_0203	scaffold00057:1,045,359-1,046,217	ERPQDPVQYLANFLmENR	scaffold00057:-:1045543-1045596	Yes	novel gene	-	KB664421:-:440512-440565	73	6.8	2236.09	3.99	746.035	3	M15(Oxidation)	5	Testis
		KPAGNNLQSLPTR	scaffold00057:-:1045657-1045695				KB664421:-:440626-440664	86	4.08	1395.77	1.63	698.39	2		8	Testis
IOB_NIMR_0204	scaffold00057:811960-812962	EIEIDIEPTDKVDR	scaffold00057:-:812388-812429	Yes	Annotated	ASTE015290	KB664421:-:209988-210029	75	3.9	1671.85	1.91	836.427	2		16	Thorax; Testis; Antennae; Male accessory glands; Midgut; Proboscis
		eIEIDIEPTDkVDR	scaffold00057:-:812388-812429				KB664421:-:209988-210029	75	3.9	1671.85	1.91	836.427	2		16	Thorax; Testis; Antennae; Male accessory glands; Midgut; Proboscis
		VQGGSVLHLVLALR	scaffold00057:-:812148-812189				KB664421:-:209748-209789	94	5.57	1461.89	-0.68	731.448	2		7	Thorax; Antennae; Legs
		QMNDDKTAQDYK	scaffold00057:-:812191-812220
IOB_NIMR_0205	scaffold00057:959199-959942	DVSTIPcFR	scaffold00057:-:959651-959677	Yes	protein extension	ASTE011703	KB664421:-:357052-357078	30	2.12	1094.53	0.67	547.769	2	C7(Carbamidomethyl)	4	Antennae; Midgut; Proboscis; Testis
IOB_NIMR_0206	scaffold00006:3051130-3052718	YPEVWAMLIR	scaffold00006:-:3052603-3052632	Yes	protein extension	ASTE009716	KB664437:-:304095-304124	42	1.86	1277.67	0.89	639.34	2		1	Brain
		LTNFLQTR	scaffold00006:-:3052633-3052656				KB664437:-:304125-304148	54	1.62	992.555	2.67	496.781	2		5	Brain
IOB_NIMR_0207	scaffold00006:978542-979840	VYETHGIGPK	scaffold00006:-:979139-979168	No	Annotated	ASTE006391	-	44	-	1100.58	2.23	550.792	2		1	Brain
		LSNVSPAEFAR	scaffold00006:-:979262-979294				-	54	4.22	1190.62	-0.59	595.812	2		1	Brain
IOB_NIMR_0208	scaffold00006:1502220-1503034	SLASLLQTLTDVVR	scaffold00006:+:1502352-1502393	No	Annotated	ASTE006355	-	69	3.5	1515.88	1.56	758.442	2		2	Testis
		SSSSSSSSSKPTFVHESVPQRPK	scaffold00006:+:1502612-1502680				-	41	4.93	2433.23	12.66	609.063	4		1	Testis
IOB_NIMR_0209	scaffold00006:1551927-1553719	HPEPDAATIK	scaffold00006:+:1553498-1553527	Yes	Annotated		-	43	3.91	1078.55	-0.47	539.78	2		1	Testis
IOB_NIMR_0210	scaffold00006:27515-29174	KNQEYISEmNK	scaffold00006:+:27818-27850	Yes	protein extension	ASTE006456	-	81	5.52	1383.66	-1.46	692.331	2		2	Brain
		NQEYISEmNK	scaffold00006:+:27821-27850				-	54	2.41	1255.56	-0.15	628.285	2		3	Brain
		ETAmQISR	scaffold00006:+:27982-28005				-	64	-	951.457	0.33	476.232	2	M4(Oxidation)	1	Brain
		RPGTLAPIVPLSFVVAYYADLAYGTK	scaffold00006:+:28087-28164				-	60	7.98	2782.52	1.97	928.179	3		4	Antennae; Legs
IOB_NIMR_0211	scaffold00032:1,916,678-1918785	fQQVIFSDSVIGHFAR	scaffold00032:-:1917901-1917948	Yes	Annotated	ASTE004938	KB664855:+:659931-659978	66	4.04	1995.06	-0.01	665.69	3	N-Term(iTRAQ4plex)	1	Midgut
		NDPESYISVEQFR	scaffold00032:-:1917186-1917224				KB664855:+:660655-660693	73	3.63	1583.74	2.7	792.373	2		3	Midgut
IOB_NIMR_0212	scaffold00006:3378306-3386555	ASDPDGTTINVPSK	scaffold00006:+:3378641-3378682	Yes	Annotated	ASTE003406	KB664465:-:357404-357445	85	3.56	1401.69	2.29	701.348	2		16	Testis; Fatbody; Malpighian tubules; Midgut; Ovary; Salivary gland
		DIVTPLPPLSQPIPDLPPVQYARPGDQK	scaffold00006:+:3378683-3378766				KB664465:-:357320-357403	24	3.95	3051.68	10.25	1017.9	3		3	Fatbody; Midgut; Salivary gland
		FGQFcTVGVVIDSGPR	scaffold00006:+:3378824-3378871				KB664465:-:357215-357262	92	4.94	1738.84	-11.16	869.923	2	C5(Carbamidomethyl)	4	Thorax; Male accessory glands; Salivary gland
		LAFQSTSEYGER	scaffold00006:+:3378917-3378952				KB664465:-:357134-357169	88	3.55	1387.65	0.51	694.328	2		22	Thorax; Brain; Testis; Antennae; Fatbody; Male accessory glands; Maxillary palps; Midgut; Ovary; Proboscis; Salivary gland
		HGGIcDcQSTR	scaffold00006:+:3378980-3379012				KB664465:-:357074-357106	77	4.2	1290.53	1.22	645.77	2	C5(Carbamidomethyl); C7(Carbamidomethyl)	2	Testis
		DTFVYAASADSR	scaffold00006:+:3379013-3379048				KB664465:-:357038-357073	71	3.94	1302.62	19.02	651.814	2		12	Thorax; Testis; Antennae; Fatbody; Midgut; Salivary gland
		DNTLGFPK	scaffold00006:+:3379220-3379243				KB664465:-:356843-356866	59	3.09	891.457	0.39	446.232	2		9	Testis; Fatbody; Midgut; Salivary gland
		YFAQGSATWENEK	scaffold00006:+:3379382-3379420				KB664465:-:356666-356704	81	4.11	1530.69	0.61	765.847	2		12	Thorax; Testis; Antennae; Legs; Maxillary palps; Midgut; Proboscis; Salivary gland
		GVDTSVAQYTGGSK	scaffold00006:+:3379442-3379483				KB664465:-:356603-356644	59	4.9	1657.86	-0.3	829.435	2	N-Term(iTRAQ4plex); K14(iTRAQ4plex)	1	Midgut
		LEEcAIPVYAAVGLPELAHVVIGLK	scaffold00006:+:3379484-3379558				KB664465:-:356528-356602	57	7.02	2661.46	-2.28	887.826	3	C4(Carbamidomethyl)	9	Thorax; Brain; Antennae; Legs; Ovary; Testis
		TQLQSMLLMNLEARPVVFEDIGR	scaffold00006:+:3379868-3379936				KB664465:-:356150-356218	51	3.7	2660.43	13.44	887.48	3		1	Salivary gland
		mVLAGVGVPHDELVR	scaffold00006:+:3379325-3379369				KB664465:-:356717-356761	64	5.25	1607.86	0.36	536.624	3	M1(Oxidation)	5	Thorax; Brain; Male accessory glands; Midgut; Salivary gland
		SASTSATTGAAKPPASK	scaffold00006:+:3380982-3381032				KB664465:-:355054-355104	54	3.42	1532.79	-0.03	511.602	3		1	Midgut
		MVLAGVGVPHDELVR	scaffold00006:+:3379325-3379369				KB664465:-:356717-356761	64	5.25	1607.86	0.36	536.624	3	M1(Oxidation)	5	Thorax; Brain; Male accessory glands; Midgut; Salivary gland
			scaffold00006:+:3380055-3380059
IOB_NIMR_0213	scaffold00006:2905311-2910221	KPISGTTPR	scaffold00006:+:2906329-2906355	Yes	Annotated	ASTE009694	KB664437:+:161101-161127	40	2.98	956.554	1.36	478.78	2		2	Testis
IOB_NIMR_0214	scaffold00233:2531-20900	GEFTPFFFNNYK	scaffold00233:+:19796-19831	Yes	novel gene		KB664784:-:72157-72192	53	-	1510.7	1.25	755.855	2		1	Malpighian tubules
		GEFTPFFFNNYKLPIK	scaffold00233:+:19796-19843				KB664784:-:72145-72192	35	4.34	1962.02	0.66	654.677	3		3	Testis; Malpighian tubules; Brain
		YSSLEAAAATR	scaffold00233:+:20033-20065				KB664784:-:71923-71955	73	3.52	1139.57	-0.35	570.288	2		2	Testis; Brain
		ELVNNFR	scaffold00233:+:20369-20389				KB664784:-:71599-71619	54	-	891.468	-0.3	446.238	2		1	Brain
IOB_NIMR_0215	scaffold00390:4949-8591	lEDLSDAIVQDFALMR	scaffold00390:-:8379-8426	Yes	novel gene		KB664867:+:5856-5903	110	5.66	1980.02	0.33	990.515	2	N-Term(iTRAQ4plex)	6	Ovary; Malpighian tubules; Midgut; Fatbody
		LEDLSDAIVQDFALmR	scaffold00390:-:8379-8426				KB664867:+:5856-5903	110	5.66	1980.02	0.33	990.515	2	N-Term(iTRAQ4plex)	6	Ovary; Malpighian tubules; Midgut; Fatbody
		LEDLSDAIVQDFALMR	scaffold00390:-:8379-8426				KB664867:+:5856-5903	110	5.66	1980.02	0.33	990.515	2	N-Term(iTRAQ4plex)	6	Ovary; Malpighian tubules; Midgut; Fatbody
IOB_NIMR_0216	scaffold00674:4-4460	LYDDPTDSK	scaffold00674:+:4026-4052	Yes	novel gene		KB665132:+:30474-30500	79	2.66	1053.47	-3.33	527.239	2		14	Brain; Testis; Antennae; Head; Legs; Male accessory glands; Proboscis; Salivary gland
		LYDDPTDSKLK	scaffold00674:+:4026-4058				KB665132:+:30474-30506	51	4.1	1294.66	2.03	647.831	2		2	Proboscis
		VRYEPVNLEK	scaffold00674:+:4101-4130				KB665132:+:30549-30578	44	4.86	1246.68	3.81	416.233	3		7	Head; Male accessory glands; Malpighian tubules; Proboscis
		YEPVNLEKER	scaffold00674:+:4107-4136				KB665132:+:30555-30584	49	2.83	1276.66	3.25	638.832	2		2	Proboscis
		LAAEEAER	scaffold00674:+:4303-4326				KB665132:+:30751-30774	60	2.31	888.441	-1.65	444.724	2		4	Testis; Male accessory glands
		IEEERLAEEAR	scaffold00674:+:4333-4365				KB665132:+:30781-30813	47	3.59	1344.68	3.36	672.844	2		2	Proboscis
IOB_NIMR_0217	scaffold00863:598-799	DFVLSTTEEFVNKFNGTR	scaffold00863:-:614-667	Yes	protein extension	ASTE002597	KB664422:+:338557-338610	84	3.4	2104.04	4.21	1052.53	2		1	Fatbody
		dFVLSTTEEFVNk	scaffold00863:-:629-667				KB664422:+:338557-338595	67	5.45	1816.96	2.04	908.984	2	N-Term(iTRAQ4plex); K13(iTRAQ4plex)	2	Ovary; Malpighian tubules; Midgut; Fatbody
		DFVLSTTEEFVNK	scaffold00863:-:629-667				KB664422:+:338557-338595	67	5.45	1816.96	2.04	908.984	2	N-Term(iTRAQ4plex); K13(iTRAQ4plex)	2	Ovary; Malpighian tubules; Midgut; Fatbody
IOB_NIMR_0218	scaffold00327:9345-11665	NFGSYVTHETRHFIYFYLGQVAILLFK	scaffold00327:-:11447-11527	Yes	novel gene		-	27	4.46	3263.71	0.78	816.682	4		2	Antennae; Ovary
		NFGSYVTHETR	scaffold00327:-:11495-11527				-	95	4.35	1310.61	-0.48	437.542	3		60	Brain; Malpighian tubules; Salivary gland; Testis; Antennae; Fatbody; Male accessory glands; Ovary; Midgut
		nFGSYVTHETR	scaffold00327:-:11495-11527				-	95	4.35	1310.61	-0.48	437.542	3		60	Brain; Malpighian tubules; Salivary gland; Testis; Antennae; Fatbody; Male accessory glands; Ovary; Midgut
		KYNPTWHcIVGR	scaffold00327:-:11528-11563				-	74	4.98	1530.78	9.73	765.893	2	C8(Carbamidomethyl)	15	Testis; Antennae; Legs
IOB_NIMR_0219	scaffold00332:4679-5743	nALNNTYPGYR	scaffold00332:-:5676-5708	Yes	novel gene		-	50	4.52	1426.72	0.49	713.864	2	N-Term(iTRAQ4plex)	1	Midgut
		NALNNTYPGYR	scaffold00332:-:5676-5708				-	50	4.52	1426.72	0.49	713.864	2	N-Term(iTRAQ4plex)	1	Midgut
IOB_NIMR_0220	scaffold00569:532-3823	QHHITPDEVDQFAR	scaffold00569:+:1805-1846	Yes	Annotated	ASTE007478	KB665310:+:588046-588087	49	3.89	1692.81	1.63	564.942	3		1	Testis
		SRPADSATPAR	scaffold00569:+:1871-1903				KB665310:+:588112-588144	54	3.29	1128.58	1.35	564.792	2		2	Testis
IOB_NIMR_0221	scaffold00051:760855-762345	LLYGYGGPELYQYK	scaffold00051:+:762198-762239	Yes	protein extension	ASTE010536	KB664456:-:325637-325678	80	4.05	1663.83	-1.8	832.42	2		3	Fatbody; Proboscis
		SFSPLDGIH	scaffold00051:+:762240-762266				KB664456:-:325610-325636	61	2.15	972.481	2.01	486.744	2		1	Proboscis
IOB_NIMR_0222	scaffold01145:72-2823	lEVAQFPTGcVQADkPAQFMVR	scaffold01145:-:2196-2261	Yes	protein extension	ASTE002890	KB664488:+:899137-899202	69	7.16	2769.4	-4.6	923.805	3	N-Term(iTRAQ4plex); C10(Methylthio); K15(iTRAQ4plex)	2	Ovary; Malpighian tubules; Midgut; Fatbody
		LEVAQFPTGcVQADKPAQFmVR	scaffold01145:-:2196-2261				KB664488:+:899137-899202	69	7.16	2769.4	-4.6	923.805	3	N-Term(iTRAQ4plex); C10(Methylthio); K15(iTRAQ4plex)	2	Ovary; Malpighian tubules; Midgut; Fatbody
		LEVAQFPTGcVQADKPAQFMVR	scaffold01145:-:2196-2261				KB664488:+:899137-899202	69	7.16	2769.4	-4.6	923.805	3	N-Term(iTRAQ4plex); C10(Methylthio); K15(iTRAQ4plex)	2	Ovary; Malpighian tubules; Midgut; Fatbody
		VYISPAmGEAHK	scaffold01145:-:2262-2297				KB664488:+:899101-899136	84	3.25	1318.64	-1.31	659.826	2	M7(Oxidation)	4	Fatbody; Male accessory glands
		VYISPAMGEAHK	scaffold01145:-:2262-2297				KB664488:+:899101-899136	84	3.25	1318.64	-1.31	659.826	2	M7(Oxidation)	4	Fatbody; Male accessory glands
		vYISPAmGEAHk	scaffold01145:-:2262-2297				KB664488:+:899101-899136	84	3.25	1318.64	-1.31	659.826	2	M7(Oxidation)	4	Fatbody; Male accessory glands
		YNQmHIVGSPFK	scaffold01145:-:1660-1695				KB664488:+:899703-899738	80	5.12	1436.7	1.1	718.854	2	M4(Oxidation)	10	Legs; Male accessory glands
		YNQMHIVGSPFK	scaffold01145:-:1660-1695				KB664488:+:899703-899738	80	5.12	1436.7	1.1	718.854	2	M4(Oxidation)	10	Legs; Male accessory glands
		YTPLLPGHYYMTIK	scaffold01145:-:1696-1737				KB664488:+:899661-899702	38	5.91	2001.08	0.45	667.697	3	N-Term(iTRAQ4plex); M11(Oxidation); K14(iTRAQ4plex)	1	Midgut
		yTPLLPGHYYmTIk	scaffold01145:-:1696-1737				KB664488:+:899661-899702	38	5.91	2001.08	0.45	667.697	3	N-Term(iTRAQ4plex); M11(Oxidation); K14(iTRAQ4plex)	1	Midgut
		yTPLLPGHYYMTIk	scaffold01145:-:1696-1737				KB664488:+:899661-899702	38	5.91	2001.08	0.45	667.697	3	N-Term(iTRAQ4plex); M11(Oxidation); K14(iTRAQ4plex)	1	Midgut
		YTPLLPGHYYmTIK	scaffold01145:-:1696-1737				KB664488:+:899661-899702	38	5.91	2001.08	0.45	667.697	3	N-Term(iTRAQ4plex); M11(Oxidation); K14(iTRAQ4plex)	1	Midgut
		VAMDcTEVEEGYKVR	scaffold01145:-:1738-1782				KB664488:+:899616-899660	129	4.2	1801.82	5.7	901.414	2	M3(Oxidation); C5(Carbamidomethyl)	2	Legs
		VAMDcTEVEEGYK	scaffold01145:-:1744-1782				KB664488:+:899616-899654	99	4.38	1530.66	7.05	765.832	2	C5(Carbamidomethyl)	27	Testis; Fatbody; Legs; Male accessory glands; Midgut; Ovary
		VAmDcTEVEEGYK	scaffold01145:-:1744-1782				KB664488:+:899616-899654	99	4.38	1530.66	7.05	765.832	2	C5(Carbamidomethyl)	27	Testis; Fatbody; Legs; Male accessory glands; Midgut; Ovary
		DDVDPAAVHASGK	scaffold01145:-:1885-1923				KB664488:+:899475-899513	68	3.31	1281.6	-1.86	641.306	2		7	Fatbody; Male accessory glands; Midgut; Ovary
		vGkDDVDPAAVHASGk	scaffold01145:-:1885-1932				KB664488:+:899466-899513	-	2.91	1998.09	-1.61	500.279	4	N-Term(iTRAQ4plex); K3(iTRAQ4plex); K16(iTRAQ4plex)	1	Midgut
		VGKDDVDPAAVHASGK	scaffold01145:-:1885-1932				KB664488:+:899466-899513	-	2.91	1998.09	-1.61	500.279	4	N-Term(iTRAQ4plex); K3(iTRAQ4plex); K16(iTRAQ4plex)	1	Midgut
		FNGVHIPGSPYR	scaffold01145:-:1939-1974				KB664488:+:899424-899459	60	4.66	1343.69	3.49	672.349	2		13	Testis; Legs; Male accessory glands; Midgut; Ovary
		fNGVHIPGSPYR	scaffold01145:-:1939-1974				KB664488:+:899424-899459	60	4.66	1343.69	3.49	672.349	2		13	Testis; Legs; Male accessory glands; Midgut; Ovary
		eNGIHAIHVk	scaffold01145:-:1975-2004				KB664488:+:899394-899423	31	4.3	1405.82	1.05	352.21	4	N-Term(iTRAQ4plex); K10(iTRAQ4plex)	1	Midgut
		ENGIHAIHVK	scaffold01145:-:1975-2004				KB664488:+:899394-899423	31	4.3	1405.82	1.05	352.21	4	N-Term(iTRAQ4plex); K10(iTRAQ4plex)	1	Midgut
		KDGSCDVSYVVSEPGDYR	scaffold01145:-:2346-2356
			scaffold01145:-:2423-2465
IOB_NIMR_0223	Scaffold00075:502,325-11,882	AEQAAGLDEEAAVTGK	scaffold00075:+:511810-511857	Yes	novel gene	-	-	95	5.41	1559.75	-2.22	780.379	2		9	Brain; Male accessory glands; Maxillary palps; Ovary; Proboscis
IOB_NIMR_0224	scaffold00075:557586-574549	SAVSNmAEDcNK	scaffold00075:+:574405-574440	Yes	novel gene	-	-	85	3.42	1341.54	-0.87	671.274	2	M6(Oxidation); C10(Carbamidomethyl)	2	Brain
		SAVSNMAEDcNK	scaffold00075:+:574405-574440				-	85	3.42	1341.54	-0.87	671.274	2	M6(Oxidation); C10(Carbamidomethyl)	2	Brain
		SAVSNmAEDcNKTPAGDPEK	scaffold00075:+:574405-574464				-	56	5.12	2136.92	0.17	712.977	3	M6(Oxidation); C10(Carbamidomethyl)	1	Brain
		HASPAVQQK	scaffold00075:+:574477-574503				-	63	3.4	965.516	-0.31	483.262	2		3	Brain
IOB_NIMR_0225	Scaffold00085:668,284-669,003	YEGNEELADK	scaffold00085:-:668828-668857	Yes	Annotated	ASTE004678	KB664513:-:299567-299596	65	3.06	1167.53	12.07	584.269	2		7	Testis; Antennae; Legs; Ovary; Proboscis
IOB_NIMR_0226	Scaffold00085:139,285-140496	DTSFYRPDPTGFE	scaffold00085:+:140458-140496	No	Annotated	ASTE008194	-	49	3.77	1531.67	0.6	766.339	2		1	Haemolymph
IOB_NIMR_0227	Scaffold00085:181,134-181,784	SGPASTKPPTAPSEIR	scaffold00085:+:181500-181547	No	Annotated	ASTE008205	-	73	5.22	1595.85	5.78	798.428	2		3	Ovary
		VNYcLAPER	scaffold00085:+:181569-181595				-	56	2.86	1121.54	-0.24	561.274	2	C4(Carbamidomethyl)	1	Ovary
IOB_NIMR_0228	scaffold00764:31-215	LQPmHcNTVVANWAR	scaffold00764:+:159-203	Yes	novel gene		KB664661:+:101414-101458	64	4.72	1812.87	5.2	906.94	2	M4(Oxidation); C6(Carbamidomethyl)	4	Brain; Legs; Maxillary palps; Proboscis
		LQPMHcNTVVANWAR	scaffold00764:+:159-203				KB664661:+:101414-101458	64	4.72	1812.87	5.2	906.94	2	M4(Oxidation); C6(Carbamidomethyl)	4	Brain; Legs; Maxillary palps; Proboscis
IOB_NIMR_0229	scaffold01221:1882-2650	LAPEEEMAHFVDQSR	scaffold01221:-:2398-2442	Yes	novel gene	-	KB664644:+:708208-708252	90	4.45	1758.82	3.76	586.944	3		14	Brain; Testis; Antennae; Fatbody; Midgut
		LAPEEEmAHFVDQSR	scaffold01221:-:2398-2442				KB664644:+:708208-708252	90	4.45	1758.82	3.76	586.944	3		14	Brain; Testis; Antennae; Fatbody; Midgut
		DTSTVQTAVEDKDATIR	scaffold01221:-:1947-1997				KB664644:+:708642-708692	141	4.94	1849.91	-0.06	925.461	2		15	Brain; Testis; Antennae; Fatbody; Male accessory glands
		DTSTVQTAVEDK	scaffold01221:-:1962-1997				KB664644:+:708642-708677	81	3.45	1293.62	-0.42	647.312	2		3	Brain; Antennae; Head
IOB_NIMR_0230	scaffold01723:1-255	NEDVELPDSDESLYWcK	scaffold01723:+:160-210	Yes	novel gene	-	KB664661:+:62684-62734	75	5.93	2098.88	-7.4	1049.94	2	C16(Carbamidomethyl)	16	Antennae; Fatbody; Legs; Maxillary palps; Midgut; Proboscis
		GSNATLPQPLVAFK	scaffold01723:+:34-75				KB664661:+:62558-62599	51	-	1442.81	4.12	721.907	2		1	Proboscis
IOB_NIMR_0231	scaffold00651:4693-4895	IESVDLALK	scaffold00651:+:4698-4724	Yes	Annotated	ASTE000601	KB664510:+:811872-811898	57	2.5	987.573	0.61	494.29	2		1	Ovary
		ILDNYEVR	scaffold00651:+:4725-4748				KB664510:+:811899-811922	56	-	1021.53	-2.11	511.268	2		1	Salivary gland
IOB_NIMR_0232	scaffold00062:657297-657730	AYFAVSSDTPESPGSR	scaffold00062:+:657653-657700	Yes	novel gene		-	85	4.31	1670.76	-0.98	835.886	2		4	Antennae; Ovary; Maxillary palps
IOB_NIMR_0233	scaffold06797:202-858	MEKSEGFDDYMK	scaffold06797:-:598-633	Yes	protein extension	ASTE005396	-	72	4.51	1479.61	0.55	740.311	2		4	Midgut
IOB_NIMR_0234	scaffold00798:1878-3753	GPTLYTNQFSVTK	scaffold00798:-:3613-3651	Yes	Annotated	ASTE002509	KB664511:+:1129869-1129907	77	3.54	1455.75	-0.51	728.377	2		7	Male accessory glands; Ovary; Salivary gland
IOB_NIMR_0235	scaffold03268:698-1718	VDYSITEQPHAPTPGVYMGR	scaffold03268:+:732-791	Yes	Annotated	ASTE0014045	-	59	5.49	2218.07	5.52	740.029	3		4	Testis
		VDYSITEQPHAPTPGVYmGR	scaffold03268:+:732-791				-	59	5.49	2218.07	5.52	740.029	3		4	Testis
IOB_NIMR_0236	scaffold00052:229,206-230,798	YDLGTcNLITELGNVSPER	scaffold00052:+:229343-229399	Yes	Annotated	ASTE008738	KB664515:-:91812-91868	132	4.65	2151.03	-2.44	1076.02	2	C6(Carbamidomethyl)	2	Testis; Midgut
IOB_NIMR_0237	scaffold00055:1028299-1054325	GPGDTSNFDDYEEETLR	scaffold00055:-:1040803-1040853	Yes	protein extension	ASTE008882	KB664476:-:376765-376815	122	6.29	1944.81	-0.23	972.908	2		35	Brain; Testis; Antennae; Fatbody; Head; Legs; Male accessory glands; Maxillary palps; Midgut; Ovary; Proboscis; Salivary gland
		gPGDTSNFDDYEEETLR	scaffold00055:-:1040803-1040853				KB664476:-:376765-376815	122	6.29	1944.81	-0.23	972.908	2		35	Brain; Testis; Antennae; Fatbody; Head; Legs; Male accessory glands; Maxillary palps; Midgut; Ovary; Proboscis; Salivary gland
		cKGPGDTSNFDDYEEETLR	scaffold00055:-:1040803-1040859				KB664476:-:376765-376821	128	6.1	2232.93	-1.41	1116.97	2	C1(Carbamidomethyl)	8	Brain; Testis; Midgut; Ovary
		rIEAPFIPR	scaffold00055:-:1040860-1040886				KB664476:-:376822-376848	58	4.34	1242.74	-1.13	414.919	3	N-Term(iTRAQ4plex)	3	Midgut
		FPSHFGSELKDLLR	scaffold00055:-:1041001-1041042				KB664476:-:376963-377004	80	5.97	1645.87	-1	823.438	2		36	Brain; Antennae; Fatbody; Legs; Male accessory glands; Malpighian tubules; Maxillary palps; Midgut; Proboscis; Salivary gland
		VRFPSHFGSELK	scaffold00055:-:1041013-1041048				KB664476:-:376975-377010	55	6.08	1403.74	-2.47	468.585	3		10	Brain; Antennae; Head; Midgut; Proboscis
		VTDFGFAKR	scaffold00055:-:1041241-1041267				KB664476:-:377203-377229	42	3.07	1040.55	-2.93	520.778	2		1	Brain
		DNSNLYmVLEYVPGGEMFSHLR	scaffold00055:-:1041412-1041477				KB664476:-:377374-377439	29	1.56	2587.19	-1.07	863.069	3	M7(Oxidation)	1	Brain
		RILQAISFPFLVSLK	scaffold00055:-:1041490-1041534				KB664476:-:377452-377496	49	4.46	1732.05	-0.72	866.529	2		2	Brain
		LKQVEHTLNEKR	scaffold00055:-:1041532-1041567				KB664476:-:377494-377529	57	3.8	1494.84	-0.42	498.951	3		5	Antennae; Midgut
		qVEHTLNEk	scaffold00055:-:1041535-1041561				KB664476:-:377497-377523	28	1.98	1385.76	0.1	693.385	2	N-Term(iTRAQ4plex); K9(iTRAQ4plex)	1	Midgut
		LKQVEHTLNEK	scaffold00055:-:1041535-1041567				KB664476:-:377497-377529	67	3.92	1338.74	-0.29	446.917	3		3	Testis; Midgut
		VMIVQHK	scaffold00055:-:1041622-1041642				KB664476:-:377584-377604	47	1.6	854.491	-1.17	427.749	2		2	Testis; Legs
		IKTLGTGSFGR	scaffold00055:-:1041643-1041675				KB664476:-:377605-377637	62	3.54	1136.64	0.63	379.553	3		8	Brain; Midgut
		EFLDQAK	scaffold00055:-:1041742-1041762				KB664476:-:377704-377724	51	-	850.431	0.91	425.719	2		2	Head; Salivary gland
		VDAAESVR	scaffold00055:-:1041763-1041786				KB664476:-:377725-377748	58	2.43	846.431	-0.28	423.719	2		3	Brain; Head
IOB_NIMR_0238	scaffold00046:709641-713885	IGSEPTNSVEGR	scaffold00046:-:709805-709840	Yes	novel gene		KB665343:-:348620-348655	81	3.82	1245.61	0.25	623.307	2		6	Brain; Testis; Fatbody; Male accessory glands
IOB_NIMR_0239	scaffold00046:95430-95986	tPIVIEEIDIANLAPR	scaffold00046:+:95744-95791	No	Annotated	ASTE004081	-	73	3.79	1908.09	-0.81	636.702	3	N-Term(iTRAQ4plex)	1	Ovary; Malpighian tubules; Midgut; Fatbody
IOB_NIMR_0240	scaffold04224:2-427	IIVHGGPNLPVTEQTR	scaffold04224:-:164-211	Yes	novel gene		-	81	4.99	1730.95	-0.77	865.98	2		22	Testis; Male accessory glands
		RIIVHGGPNLPVTEQTR	scaffold04224:-:164-214				-	66	5.73	1887.06	3.4	629.692	3		5	Testis
		HAVSDILEELSDEEIRR	scaffold04224:-:215-265				-	26	5.27	2011.01	0.49	671.008	3		1	Testis
		VNTGGETNVR	scaffold04224:-:65-94				-	72	3.71	1046.52	0.77	523.765	2		8	Testis
		EYIDKSKPHGSHGLK	scaffold04224:-:95-139				-	45	4.57	1695.89	7.29	565.969	3		1	Testis
IOB_NIMR_0241	scaffold00047:774180-74841	INIQPHYGTR	scaffold00047:-:774824-774853	Yes	novel gene	na	-	59	3.41	1198.63	0.69	599.82	2		3	Testis
		LNGPTRPFVK	scaffold00047:-:774301-774330				-	51	4.05	1128.65	1.13	564.831	2		5	Testis
		NTGEIYEVAVVHR	scaffold00047:-:774331-774369				-	92	5.21	1486.76	-1.79	743.885	2		8	Testis
IOB_NIMR_0242	scaffold00047:618-1768	EAQHWIETVIGEK	scaffold00047:+:751-789	Yes	Annotated	ASTE010832	KB664910:+:529-567	67	5.72	1539.78	-0.19	770.394	2		19	Thorax; Fatbody; Legs; Male accessory glands; Maxillary palps; Proboscis
		eAQHWIETVIGEk	scaffold00047:+:751-789				KB664910:+:529-567	67	5.72	1539.78	-0.19	770.394	2		19	Thorax; Fatbody; Legs; Male accessory glands; Maxillary palps; Proboscis
		DGILLcR	scaffold00047:+:826-846				KB664910:+:604-624	69	2.61	846.45	0.21	423.729	2	C6(Carbamidomethyl)	3	Legs; Proboscis
		INTTGGDYK	scaffold00047:+:883-909				KB664910:+:661-687	59	2.4	968.468	-0.07	484.738	2		4	Testis; Legs; Midgut
		iNTTGGDYk	scaffold00047:+:883-909				KB664910:+:661-687	59	2.4	968.468	-0.07	484.738	2		4	Testis; Legs; Midgut
IOB_NIMR_0243	scaffold00047:764561-765282	SmEAYAGLKPMGIIcETEHVAYSR	scaffold00047:+:764798-764869	Yes	novel gene	NA	-	73	6.5	2729.27	-1.59	683.073	4	M2(Oxidation); C15(Carbamidomethyl)	1	Testis
		SMEAYAGLKPMGIIcETEHVAYSR	scaffold00047:+:764798-764869				-	73	6.5	2729.27	-1.59	683.073	4	M2(Oxidation); C15(Carbamidomethyl)	1	Testis
		IcEVEIAHR	scaffold00047:+:765110-765136				-	64	3.22	1126.57	2.41	563.789	2	C2(Carbamidomethyl)	5	Testis
		AKPAmPAHAE	scaffold00047:+:765197-765226				-	38	-	1038.51	2.68	346.84	3	M5(Oxidation)	2	Testis
IOB_NIMR_0244	scaffold00043:613463-616395	VVANESNSGSQEQVSTVTK	scaffold00043:-:615835-615891	Yes	protein extension	ASTE006726	KB664766:+:989904-989960	159	4.32	1963.96	1.83	982.484	2		1	Testis
		IIGHTVNDDAQQK	scaffold00043:-:615964-616002				KB664766:+:989793-989831	61	3.28	1438.73	1.46	719.869	2		1	Brain
		TKVPESPSTTHAK	scaffold00043:-:616270-616308				-	56	3.74	1382.73	0.1	461.581	3		1	Ovary
IOB_NIMR_0245	scaffold00013:1450727-1452099	ASLKEHYLAQHR	scaffold00013:+:1451054-1451089	No	Annotated	ASTE006899	-	38	5.26	1452.77	-1.01	484.928	3		1	Testis
		SAPAGPSVPAEAPQSPPAVR	scaffold00013:+:1451327-1451386				-	88	3.4	1886.01	18.82	943.51	2		1	Testis
		SVGFDDDELRPDER	scaffold00013:+:1451501-1451542				-	46	2.39	1649.74	1.6	550.586	3		2	Testis
		NFLAAISAYSAGIR	scaffold00013:+:1451591-1451632				-	61	3.85	1453.78	0.66	727.394	2		1	Testis
		SAAHLALENYQR	scaffold00013:+:1451669-1451704				-	58	3.59	1372.68	-10.14	686.845	2		1	Testis
IOB_NIMR_0246	scaffold00014:190404-195724	FQLSERPLVDEK	scaffold00014:-:193092-193127	Yes	protein extension	ASTE007533	-	70	4.06	1460.78	0.6	730.891	2		15	Testis; Legs; Male accessory glands; Malpighian tubules; Midgut; Ovary; Proboscis
		QLKIPYIEcSAK	scaffold00014:-:193182-193217				-	51	3.35	1449.78	0.19	483.931	3	C9(Carbamidomethyl)	3	Midgut
		vVSLEEAQQLSR	scaffold00014:-:193218-193253				-	64	4.59	1502.83	0.87	751.919	2	N-Term(iTRAQ4plex)	2	Ovary; Malpighian tubules; Midgut; Fatbody
		VVSLEEAQQLSR	scaffold00014:-:193218-193253				-	64	4.59	1502.83	0.87	751.919	2	N-Term(iTRAQ4plex)	2	Ovary; Malpighian tubules; Midgut; Fatbody
		DEFPMLMVGNK	scaffold00014:-:193275-193307				-	42	2.97	1280.61	4.61	640.807	2		1	Fatbody
		dRDEFPMLMVGNk	scaffold00014:-:193275-193313				-	22	4.91	1839.93	-1.2	613.982	3	N-Term(iTRAQ4plex); K13(iTRAQ4plex)	1	Ovary; Malpighian tubules; Midgut; Fatbody
		DRDEFPMLMVGNK	scaffold00014:-:193275-193313				-	22	4.91	1839.93	-1.2	613.982	3	N-Term(iTRAQ4plex); K13(iTRAQ4plex)	1	Ovary; Malpighian tubules; Midgut; Fatbody
		vkDRDEFPmLmVGNk	scaffold00014:-:193275-193319				-	-	3.83	2243.19	0.63	561.553	4	N-Term(iTRAQ4plex); K2(iTRAQ4plex); M9(Oxidation); M11(Oxidation); K15(iTRAQ4plex)	2	Midgut
		VKDRDEFPMLMVGNK	scaffold00014:-:193275-193319				-	-	3.83	2243.19	0.63	561.553	4	N-Term(iTRAQ4plex); K2(iTRAQ4plex); M9(Oxidation); M11(Oxidation); K15(iTRAQ4plex)	2	Midgut
		vkDRDEFPMLMVGNk	scaffold00014:-:193275-193319				-	-	3.83	2243.19	0.63	561.553	4	N-Term(iTRAQ4plex); K2(iTRAQ4plex); M9(Oxidation); M11(Oxidation); K15(iTRAQ4plex)	2	Midgut
		QcVIDDTPAK	scaffold00014:-:193552-193581				-	63	3.69	1146.54	-1.54	573.776	2	C2(Carbamidomethyl)	4	Testis; Midgut; Ovary
		YNQTHAGYAQTFK	scaffold00014:-:195444-195482				-	89	6.11	1528.72	1.04	764.863	2		31	Brain; Testis; Fatbody; Legs; Malpighian tubules; Midgut; Ovary; Proboscis; Salivary gland
			scaffold00014:-:193545-193551
IOB_NIMR_0247	scaffold00014:1657857-1659301	HVEAYDPNPHYSFSYGVSDPHTGDSK	scaffold00014:+:1658635-1658712	Yes	protein extension	ASTE003151	-	44	7.03	2906.26	-1.61	727.321	4		8	Fatbody; Head; Legs; Proboscis
		HAEETLSNGVVHGSYSLTEPDGTIR	scaffold00014:+:1658713-1658787				-	89	8.26	2669.28	0.31	890.432	3		4	Fatbody
		KVTYTADKIHGFNAVVEK	scaffold00014:+:1658788-1658841				-	40	5.26	2020.08	-4.05	674.031	3		2	Head; Proboscis
		IHGFNAVVEK	scaffold00014:+:1658812-1658841				-	48	3.58	1113.61	-0.13	557.306	2		3	Fatbody; Head
		SGHAIHTAPVLK	scaffold00014:+:1658842-1658877				-	55	5.59	1230.7	0.77	410.904	3		4	Testis; Fatbody
IOB_NIMR_0248	scaffold00014:2696454-2696828	cccQQKPVWRPPDGWPERPIK	scaffold00014:+:2696612-2696674	Yes	novel gene		-	23	5.71	2694.29	1.67	898.768	3	C1(Carbamidomethyl); C2(Carbamidomethyl); C3(Carbamidomethyl)	3	Testis
		TPYFSSIPTR	scaffold00014:+:2696741-2696770				-	64	2.83	1168.6	3.17	584.805	2		2	Testis
IOB_NIMR_0249	scaffold00101:431840-432757	IAFEQSGIILHPNWNPSLIR	scaffold00101:+:432242-432301	No	Annotated	ASTE004449	-	38	5	2305.24	-2.93	769.084	3		1	Larvae
		VVSPVTFTDR	scaffold00101:+:432323-432352				-	71	-	1120.6	0.02	560.804	2		1	Larvae
		FADSIQEASAVLR	scaffold00101:+:432437-432475				-	80	3.55	1406.73	-1.49	703.866	2		1	Larvae
		YVNNPIQTNLAcSVR	scaffold00101:+:432476-432520				-	84	4.1	1748.88	2.12	874.943	2	C12(Carbamidomethyl)	2	Larvae
		FPGVVQPENIcLSGDAGR	scaffold00101:+:432521-432574				-	93	4	1915.93	0.63	958.471	2	C11(Carbamidomethyl)	2	Larvae
IOB_NIMR_0250	scaffold00105:112099-112865	IQLINMNTR	scaffold00105:+:112542-112568	Yes	Annotated	ASTE009643	-	-	1.32	1102.61	1.45	551.806	2		1	Brain
		cLHDFHVR	scaffold00105:+:112768-112791				-	24	3.17	1083.51	-0.48	361.843	3	C1(Carbamidomethyl)	1	Brain
IOB_NIMR_0251	scaffold00127:99050-97621	ALWIDTDNDVcR	scaffold00127:-:97897-97932	Yes	Annotated	ASTE006108	-	69	2.06	1477.67	0.2	739.341	2	C11(Carbamidomethyl)	3	Testis
		LLQIDPHHSVIK	scaffold00127:-:98381-98416				-	21	-	1399.82	10.05	350.71	4		1	Testis
		LHTHIVER	scaffold00127:-:98423-98446				-	39	3.34	1004.57	3.93	335.527	3		3	Testis
		GWILVDYPNIADDVK	scaffold00127:-:98023-98067				-	84	3.42	1717.88	0.38	859.444	2		1	Testis
		LLQPDcLER	scaffold00127:-:98068-98094				-	56	2.93	1143.59	2.1	572.296	2	C6(Carbamidomethyl)	2	Testis
		DNVHTSELIATIVQHR	scaffold00127:-:98095-98142				-	95	6.48	1832.96	1.17	916.985	2		5	Testis
IOB_NIMR_0252	scaffold00132:208336-210966	QLNAESYDMK	scaffold00132:-:210526-210555	Yes	protein extension	ASTE003690	KB664444:-:1404169-1404198	53	2.23	1198.54	-0.89	599.774	2		1	Testis
		ISALENLQILLLK	scaffold00132:-:209660-209698				KB664444:-:1403304-1403342	86	3.64	1467.91	0.27	734.461	2		1	Testis
		FAGANPAAQPITSIEK	scaffold00132:-:209876-209923				KB664444:-:1403520-1403567	81	4.18	1614.85	-0.08	807.928	2		2	Testis; Midgut
IOB_NIMR_0253	scaffold00129:98805-158751	KRPGVETLSVGSEFIK	scaffold00129:+:126643-126690	Yes	novel gene	NA	-	64	6.25	1746.98	2.28	873.993	2		13	Brain
		RPGVETLSVGSEFIK	scaffold00129:+:126646-126690				-	73	4.79	1618.88	0.87	809.944	2		4	Brain
		QSYFHIATTSNEFIR	scaffold00129:+:126730-126774				-	69	2.44	1813.89	-0.58	605.3	3		1	Brain
IOB_NIMR_0254	scaffold00193:7304-7808	NSAEHQLNIGLLVPHTNFGR	scaffold00193:+:7607-7666	No	novel gene	-	-	33	-	2217.15	0.36	555.044	4		2	Brain
		NSAEHQLNIGLLVPHTNFGRR	scaffold00193:+:7607-7669				-	21	4.7	2373.26	2.07	594.07	4		1	Brain
IOB_NIMR_0255	scaffold00045:464728-465378	SSSIKPSIK	scaffold00045:-:464994-465020	Yes	novel gene	-	-	62	3.49	946.557	0.32	473.782	2		3	Testis
IOB_NIMR_0256	scaffold00193:24162-37135	GLVWEEIGVWK	scaffold00193:+:35249-35281	No	novel gene	novel gene	-	63	3	1315.71	1.72	658.357	2		2	Brain
		DIAWPGNSHTPPQGVPEK	scaffold00193:+:35312-35365				-	11	4.81	1929.95	0.05	643.987	3		2	Brain
		ITFLEEAPYINLSPADPVSGK	scaffold00193:+:35378-35440				-	71	4.44	2261.17	0.16	1131.09	2		5	Brain
		VAADHEmTDIDmGQAHK	scaffold00193:+:35471-35521				-	24	1.58	1900.81	-0.83	634.276	3	M7(Oxidation); M12(Oxidation)	1	Brain
		WNGLIHELVNR	scaffold00193:+:35654-35686				-	40	2.48	1350.73	1	450.915	3		1	Brain
		LSHPFSHKPTIK	scaffold00193:+:36188-36223				-	32	3.88	1391.78	0.02	696.393	2		2	Brain
		FGTIPWSHTDSTISK	scaffold00193:+:36224-36268				-	53	4.72	1676.83	0.07	559.614	3		7	Brain
		GAVYEATEILR	scaffold00193:+:36794-36826				-	64	3.17	1221.65	0.06	611.327	2		4	Brain
		TmQAHGIKPPQLK	scaffold00193:+:36923-36961				-	-	3.77	1464.8	0.2	488.938	3	M2(Oxidation)	1	Brain
		TMQAHGIKPPQLK	scaffold00193:+:36923-36961				-	-	3.77	1464.8	0.2	488.938	3	M2(Oxidation)	1	Brain
		MGSTSDIIGITGSGSAR	scaffold00193:+:36962-37012				-	69	3.23	1609.78	-1.38	805.395	2		1	Brain
		VMLLYCTK	scaffold00193:+:34784-34807				-	42	1.38	1027.53	0.02	514.269	2	C6(Carbamidomethyl)	2	Brain
		VYAYGVEYYLNDVK	scaffold00193:+:34997-35038				-	49	2.38	1695.83	0.2	848.417	2		1	Brain
		RLDTHQLSCEDQGR	scaffold00193:+:35051-35092				-	49	5.24	1714.79	-0.03	572.269	3	C9(Carbamidomethyl)	3	Brain
		WDSGEVFFK	scaffold00193:+:35099-35125				-	40	2.03	1114.52	0.1	557.764	2		4	Brain
		LDTHQLSCEDQGR	scaffold00193:+:35054-35092				-	31	3.86	1558.69	-0.59	520.235	3	C8(Carbamidomethyl)	2	Brain
		EQVAAMDHFK	scaffold00193:+:24596-24613
IOB_NIMR_0257	scaffold00009:2514740-2522324	VMPGLYIGNYR	scaffold00009:-:2520254-2520286	Yes	novel exon	ASTE011529	-	43	1.51	1282.66	0.57	641.835	2		1	Brain
		SmGAPAGSGAQScPTSPR	scaffold00009:-:2514925-2514978				-	82	3.98	1734.75	-1.07	867.879	2	M2(Oxidation); C13(Carbamidomethyl)	1	Brain
IOB_NIMR_0258	scaffold00120:128384-130940	HRHPSDAAAVDVR	scaffold00120:-:128845-128883	Yes	protein extension	ASTE003857	-	74	5.31	1430.73	3.56	477.581	3		1	Testis
		VTVGSGATSNSSNSSSSK	scaffold00120:-:129232-129285				-	124	4.65	1656.77	0.2	828.887	2		3	Testis; Ovary
		VIADDDDNVR	scaffold00120:-:130123-130152				-	71	3.17	1131.53	1.65	566.268	2		4	Testis
IOB_NIMR_0259	scaffold00046:903083-903949	TASENDDENSQLLK	scaffold00046:+:903860-903901	No	novel gene	novel gene	-	92	3.62	1563.71	-0.03	782.36	2		3	Antennae; Fatbody; Midgut
IOB_NIMR_0260	scaffold00010:2139549-2140250	DLTLLEADcQLLGLISSPATR	scaffold00010:-:2139570-2139632	No	Annotated	ASTE011170	-	86	5.66	2286.2	-0.8	1143.6	2	C9(Carbamidomethyl)	6	Legs; Malpighian tubules
		VKDLELSTR	scaffold00010:-:2139651-2139677				-	53	2.73	1060.6	-0.07	354.205	3		5	Brain; Testis; Midgut
IOB_NIMR_0261	scaffold00098:471759-472296	MFYEEETESDGEELNR	scaffold00098:+:472097-472144	Yes	novel gene		-	101	3.88	1977.81	2.65	989.407	2		2	Testis
IOB_NIMR_0262	scaffold10785:12-783	GYSSEENTWEPEENLDcDDLIQAFK	scaffold10785:+:685-759	No	protein extension	ASTE003639	KB664444:-:742074-742148	74	4.41	2989.27	1.96	1495.14	2	C17(Carbamidomethyl)	5	Antennae; Legs; Midgut; Ovary

## Sheet: Table S5.2_Novel exons
Supplemental Table S5.2 - A summary of results from proteogenomics analysis
Novel exons
Prasad et al., 2016. Integrating transcriptomic and proteomic data for accurate assembly and annotation of genomes
	Gene symbol (Indian)	Peptide sequence	Genomic coordinates of identified peptide (Indian)	Genome coordinates of novel exon	Transcript evidence (Yes/No)	Category (according to SDA500)	Gene involved (in SDA500)	SDA500 coordinates	Mascot score	Sequest score	MH+ [Da]	Delta M (ppm)	m/z [Da]	Charge	Modifications	no. PSMs	Tissues
1	ASTEI05040	NILLcDDNVVK	scaffold00027:+:1770648-1770680	scaffold00027:1770466-1771061	Yes	novel exon	ASTE001616	KB664471:-:488155-488187	48	2.9	1302.67	-2.52	651.838	2	C5(Carbamidomethyl)	4	Testis; Midgut; Salivary gland
		VLHGDLAAR	scaffold00027:+:1770621-1770647					KB664471:-:488188-488214	59	3.17	951.539	2.52	317.851	3		1	Testis
		QLGTGAFGVVMK	scaffold00027:+:1768140-1768175	scaffold00027:1767883-1768359				KB664471:-:491307-491342	65	1.44	1207.65	-0.6	604.328	2		1	Salivary gland
		imVNEDETTVAVk	scaffold00027:+:1768191-1768229					KB664471:-:491253-491291	51	3.9	1752.93	1.12	876.969	2	N-Term(iTRAQ4plex); M2(Oxidation); K13(iTRAQ4plex)	1	Midgut
		IMVNEDETTVAVK	scaffold00027:+:1768191-1768229					KB664471:-:491253-491291	105	3	1448.73	-2.06	724.867	2		14	Testis; Fatbody; Midgut; Ovary; Salivary gland
		ImVNEDETTVAVK	scaffold00027:+:1768191-1768229					KB664471:-:491253-491291	87	3.44	1464.73	1.02	732.867	2	M2(Oxidation)	8	Testis; Fatbody; Midgut; Salivary gland
		iMVNEDETTVAVk	scaffold00027:+:1768191-1768229					KB664471:-:491253-491291	44	3.21	1736.93	-1.24	868.97	2	N-Term(iTRAQ4plex); K13(iTRAQ4plex)	1	Ovary; Malpighian tubules; Midgut; Fatbody
		KQTDNEVMR	scaffold00027:+:1768239-1768265					KB664471:-:491217-491243	-	1.92	1120.54	1.82	560.775	2		1	Testis
2	ASTEI06191	TGDDSQEQPAAAHPHHHHLTESVKPSGSEPK	scaffold00038:+:94449-94541	scaffold00038:94423-94913	Yes	Annotated	ASTE001516	KB664509:-:302662-302754	28	3.16	3311.56	4.41	663.117	5		1	Testis
		TVLMQNVNNK	scaffold00038:+:94731-94760					KB664509:-:302443-302472	56	-	1160.61	0.76	580.809	2		3	Brain
3	ASTEI06582	IRDASANDGK	scaffold00042:184226-184255	scaffold00042:184202-184264	Yes	Annotated	ASTE000830	-	57	-	1046.52	-0.53	523.765	2		1	Testis
4	ASTEI06698	DSKPNDSSGEGWTQR	scaffold00043:620927-620971	scaffold00043:620906-620998	Yes	novel exon	ASTE006725	KB664766:+:984953-984997	60	3.13	1663.73	-0.87	832.368	2		2	Brain; Testis
5	ASTEI06650	SVVQYDSAGASNNNR	scaffold00043:-:68235-68279	scaffold00043:68020-69063	Yes	Annotated	ASTE007244	KB664571:+:231317-231361	84	3.3	1581.73	3.8	791.369	2		1	Testis
		VTTLGNSDSNLASSR	scaffold00043:-:68442-68486					KB664571:+:231110-231154	83	3.09	1521.75	-0.31	761.379	2		1	Brain
		TSHAVHAQTQPVVR	scaffold00043:-:68901-68942					KB664571:+:230654-230695	85	5	1530.81	-0.72	510.942	3		2	Testis; Male accessory glands
6	ASTEI08928	GGPmVLGTDGTDFEHR	scaffold00079:160362-160409	Exon 3:scaffold00079:160333-160629	Yes	protein extension	ASTE009025	KB665132:+:660801-660848	102	7.87	1704.78	11.74	852.896	2	M4(Oxidation)	7	Testis; Antennae; Legs; Proboscis
			scaffold00079:-:160333-160353
7	ASTEI07748	VIGSGSSSSSSGSLK	scaffold00058:167079-167123	scaffold00058:167058-167228	No	Annotated	ASTE001337	-	120	4.36	1339.67	-0.13	670.339	2		7	Brain
		VQPPLGQQTTVYHGK	scaffold00058:167124-167168					-	56	3.07	1652.88	0.74	826.942	2		2	Brain
		SKVQPPLGQQTTVYHGK	scaffold00058:167124-167174					-	69	7.03	1868	-0.55	623.339	3		1	Brain
8	ASTEI08405	KAQALTANDNR	scaffold00067:-:319292-319324	scaffold_00067:319286-319411	No	Annotated	ASTE008156	-	64	4.17	1201.63	2.67	601.319	2		1	Testis
9	ASTEI07905	LQDSDADPVGSQR	scaffold00060:-:19451-19489	scaffold00060:19452-19493	Yes	novel exon	ASTE000634	KB664510:-:1902585-1902623	81	3.72	1387.64	-0.92	694.325	2		2	Brain
10	ASTEI02092	VTVILAYYR	scaffold00008:692649-692675	scaffold00008:692585-692703	Yes	novel exon	ASTE010313	-	49	-	1097.66	17.94	549.331	2		1	Male accessory glands
11	ASTEI02288	YVIDGGVMERPENcPDK	scaffold00009:-:14625-14675	scaffold00009:14517-14702	Yes	novel exon	ASTE004562	KB665143:-:18492-18542	24	-	1978.89	-3.03	660.303	3	C14(Carbamidomethyl)	1	Brain
12	ASTEI02448	EVQPPFKPK	scaffold00009:-:2393450-2393476	scaffold00009:2393447-2393587	Yes	novel gene	NA	-	26	-	1069.6	-2.61	357.205	3		1	Brain
		GTDELYAIK	scaffold00009:-:2394946-2394972	scaffold00009:2394820-2395125	Yes			-	54	1.53	1009.52	-0.75	505.263	2		1	Brain
		KGTDELYAIK	scaffold00009:-:2394946-2394975					-	71	4.8	1137.61	-1.31	569.31	2		13	Brain; Antennae; Head; Salivary gland
13	ASTEI09484	KVHQSVAMSR	scaffold00093:532533-532562	scaffold00093:532489-532656	Yes	novel exon	ASTE004410	KB664688:+:1224109-1224138	83	4.84	1142.61	2.1	381.542	3		15	Thorax; Malpighian tubules; Testis; Fatbody
		LDDIARENNGYLANSK	scaffold00093:533065-533109					KB664688:+:1224734-1224781	39	3.93	1792.89	3.16	598.301	3		3	Malpighian tubules; Pupae
		ENNGYLANSK	scaffold00093:533113-533175					KB664688:+:1224752-1224781	79	3.68	1109.52	2.14	555.266	2		6	Thorax; Testis; Larvae
		KLVTLNNEVIPFYLEKLDDIAR	scaffold00093:533158-533205					KB664688:+:1224686-1224751	117	8.87	2603.45	0.73	1302.23	2		18	Thorax; Fatbody; Larvae; Malpighian tubules; Midgut; Pupae; Salivary gland
		LVTLNNEVIPFYLEKLDDIAR	scaffold00093:533110-533175					KB664688:+:1224689-1224751	98	7.32	2475.35	-0.71	1238.18	2		44	Thorax; Fatbody; Larvae; Legs; Malpighian tubules; Midgut; Ovary; Proboscis; Pupae; Salivary gland; Testis
14	ASTEI00924	TNLINELcK	scaffold00003:-:3973431-3973457	scaffold00003:3973393-3973494	Yes	Annotated	ASTE002176	KB664389:+:615038-615064	71	3.31	1104.57	-0.88	552.789	2	C8(Carbamidomethyl)	7	Testis; Malpighian tubules; Midgut; Ovary; Pupae
		tNLINELck	scaffold00003:-:3973431-3973457					KB664389:+:615038-615064	63	4.21	1381.73	-5.36	691.371	2	N-Term(iTRAQ4plex); C8(Methylthio); K9(iTRAQ4plex)	1	Ovary; Malpighian tubules; Midgut; Fatbody
15	ASTEI02774	YGPAVTcDQcK	scaffold00011:+:826865-826897	Exon 5:scaffold00011:826,843-826,930	Yes	exon annotated	ASTE001037	KB664721:+:1075565-1075597	75	3.59	1298.55	1.91	649.78	2	C7(Carbamidomethyl); C10(Carbamidomethyl)	4	Brain; Testis; Midgut
16	ASTEI03053	kLSFEPVAATLAPk	scaffold00012:+:2908386-2908427					KB664777:-:812371-812412	73	5.99	1904.16	0.62	952.583	2	N-Term(iTRAQ4plex); K1(iTRAQ4plex); K14(iTRAQ4plex)	4	Midgut
		KLSFEPVAATLAPK	scaffold00012:+:2908386-2908427					KB664777:-:812371-812412	96	6.29	1471.86	3.4	736.432	2		72	Salivary gland; Testis; Antennae; Fatbody; Head; Malpighian tubules; Maxillary palps; Midgut; Proboscis
		lSFEPVAATLAPk	scaffold00012:+:2908389-2908427					KB664777:-:812371-812409	34	-	1631.96	1.18	816.485	2	N-Term(iTRAQ4plex); K13(iTRAQ4plex)	1	Midgut
		LSFEPVAATLAPK	scaffold00012:+:2908389-2908427					KB664777:-:812371-812409	64	4.25	1343.75	-7.17	672.377	2		10	Antennae; Fatbody; Midgut; Proboscis; Maxillary palps; Salivary gland
17	ASTEI03067	WYYDPVQETcFAFR	scaffold00013:-:123064-123105	Exon 11:122,991-123,176	Yes	Annotated	ASTE006829	KB664843:-:306585-306626	113	4.38	1881.83	-0.1	941.417	2	C10(Carbamidomethyl)	8	Testis; Male accessory glands; Midgut; Ovary
18	ASTEI03156	lDNILLDAEGHck	scaffold00013:-:1857021-1857059	Exon 8:1,856,997-1,857,701	Yes	novel exons		KB664843:-:2122231-2122269	66	7.13	1774.9	-3.12	592.305	3	N-Term(iTRAQ4plex); C12(Methylthio); K13(iTRAQ4plex)	1	Ovary; Malpighian tubules; Midgut; Fatbody
		LDNILLDAEGHcK	scaffold00013:-:1857021-1857059				ASTE006927	KB664843:-:2122231-2122269	72	5.57	1497.74	0.45	749.372	2	C12(Carbamidomethyl)	5	Brain
		DLKLDNILLDAEGHcK	scaffold00013:-:1857021-1857068					KB664843:-:2122231-2122278	53	5.96	1853.94	0.89	618.653	3	C15(Carbamidomethyl)	2	Brain
		DVILQDDDVDcTMTEK	scaffold00013:-:1857291-1857338					KB664843:-:2122501-2122548	91	3.56	1896.82	0.19	948.914	2	C11(Carbamidomethyl)	3	Testis; Midgut; Ovary
		GTDEVYAIK	scaffold00013:-:1857351-1857377					KB664843:-:2122561-2122587	45	1.99	995.505	0.86	498.256	2		1	Brain
		KGTDEVYAIK	scaffold00013:-:1857351-1857380					KB664843:-:2122561-2122590	53	4.12	1123.6	0.22	562.303	2		2	Brain
		DDVLYPVWLSR	scaffold00013:-:1856681-1856713	Exon 9: 1,856,659-1,856,911				KB664843:-:2121887-2121919	55	2.91	1362.71	1.86	681.858	2		7	Brain; Testis; Male accessory glands; Salivary gland
		DMDWEALEQR	scaffold00013:-:1856480-1856509	Exon 10: 1,856,450-1,856,589				KB664843:-:2121686-2121715	61	2.71	1292.56	0.01	646.782	2		3	Brain; Fatbody
		DmDWEALEQR	scaffold00013:-:1856480-1856509					KB664843:-:2121686-2121715	57	1.46	1308.55	-0.02	654.78	2	M2(Oxidation)	1	Brain
		LGcTDGENQIR	scaffold00013:-:1856528-1856560					KB664843:-:2121734-2121766	72	3.21	1262.58	-0.61	631.793	2	C3(Carbamidomethyl)	3	Brain; Fatbody
		RLGcTDGENQIR	scaffold00013:-:1856528-1856563					KB664843:-:2121734-2121769	59	4.53	1418.68	-0.33	473.565	3	C4(Carbamidomethyl)	1	Brain
19	ASTEI01441	SQmAIEAIAELGYR	scaffold00005:-:2285431-2285472	scaffold00005:2285429-2285594	Yes	novel exon	ASTE002364	KB664977:+:635746-635787	67	3.44	1567.78	2.53	784.395	2	M3(Oxidation)	1	Malpighian tubules
		nYVGSWLEYAAk	scaffold00005:-:2286257-2286292	scaffold00005:2285975-2286299				KB664977:+:634926-634961	80	5.15	1688.88	-2.64	844.946	2	N-Term(iTRAQ4plex); K12(iTRAQ4plex)	1	Ovary; Malpighian tubules; Midgut; Fatbody
		NYVGSWLEYAAK	scaffold00005:-:2286257-2286292					KB664977:+:634926-634961	67	3.23	1400.69	5.55	700.85	2		9	Thorax; Testis; Antennae; Fatbody; Legs; Malpighian tubules; Ovary
20	ASTEI01550	DKNVWIQSIR	scaffold00005:-:3608444-3608473	scaffold00005:3608445-3608601	Yes	Annotated	ASTE001738	KB664599:+:668299-668328	31	2.81	1258.69	3.15	629.851	2		1	Brain
		YSFFTPENK	scaffold00005:-:3608679-3608705	scaffold00005:3608679-3608811				KB664599:+:668066-668092	50	1.57	1132.53	0.39	566.769	2		1	Brain
21	ASTEI00886	ASTSPEGcFWPR	scaffold00003:+:3479155-3479190	scaffold00003:+:3479074-3480720	Yes	Annotated	ASTE009146	-	71	2.48	1394.61	-1.18	697.811	2	C8(Carbamidomethyl)	3	Midgut
		LLEAAQESGYEYLEDFNGEDHVGFGR	scaffold00003:+:3479434-3479511					KB665376:-:85094-85171	69	5.19	2945.32	-0.83	982.445	3		1	Midgut
		lLEAAQESGYEYLEDFNGEDHVGFGR	scaffold00003:+:3479434-3479511					KB665376:-:85094-85171	83	3.81	3089.43	1.08	1030.48	3	N-Term(iTRAQ4plex)	2	Midgut
		dADLREFGISVVSDVPVGR	scaffold00003:+:3479791-3479847					KB665376:-:84758-84814	49	5.6	2175.16	1.5	725.724	3	N-Term(iTRAQ4plex)	1	Midgut
		dMVVPSYEYLMHR	scaffold00003:+:3479926-3479964					-	-	4.65	1783.86	-1.2	595.292	3	N-Term(iTRAQ4plex)	1	Midgut
		dmVVPSYEYLMHR	scaffold00003:+:3479926-3479964					-	46	5.12	1799.86	0.38	600.624	3	N-Term(iTRAQ4plex); M2(Oxidation)	1	Midgut
		IDAGYLTHR	scaffold00003:+:3480253-3480279					-	48	-	1045.54	-1.54	523.274	2		1	Malpighian tubules
		mGPSEDPDAVVDSR	scaffold00003:+:3480481-3480522					-	126	3.57	1490.64	0.75	745.826	2	M1(Oxidation)	2	Midgut
		MGPSEDPDAVVDSR	scaffold00003:+:3480481-3480522					-	114	4.01	1474.65	-0.62	737.827	2		6	Testis; Midgut
		mGPSEDPDAVVDSR	scaffold00003:+:3480481-3480522					-	126	3.57	1490.64	0.75	745.826	2	M1(Oxidation)	2	Midgut
		mGPSEDPDAVVDSR	scaffold00003:+:3480481-3480522					-	126	3.57	1490.64	0.75	745.826	2	M1(Oxidation)	2	Midgut
22	ASTEI01011	LGGSSSLVMPVFPLR	scaffold00004:+:159692-159736	scaffold00004:159553-159786	Yes	novel exon	ASTE010568	-	52	2.38	1559.86	-0.24	780.434	2		1	Brain
		TGGTAHTPHYSPYSPSR	scaffold00004:+:159737-159787					-	53	5.73	1815.84	-1.24	908.423	2		2	Brain
23	ASTEI01538	DDQREEATHHTLHSTAVDGSGGYQK	scaffold00005:-:3487913-3487987	scaffold00005:3487691-3488518	Yes	protein extension	ASTE001752	KB664599:+:789969-790043	26	5.06	2739.24	2.16	685.566	4		3	Ovary; Midgut
		MVQQHQENVGHWENRPR	scaffold00005:-:3487988-3488038					KB664599:+:789918-789968	42	5.35	2145.03	7.57	715.682	3		2	Testis
		SSGGTDGGYIDR	scaffold00005:-:3488114-3488149					KB664599:+:789807-789842	103	2.72	1184.52	-1.03	592.762	2		2	Midgut; Ovary
		TQYesLHEQPQQSYHVPSHHPDPHR	scaffold00005:-:3488150-3488224					KB664599:+:789732-789806	-	6.26	3034.4	0.83	506.572	6		1	Midgut
		LYFLYLDELR	scaffold00005:-:3488249-3488278					KB664599:+:789678-789707	74	2.54	1344.73	4.03	672.866	2		3	Testis
		WQHYQDNDQHQQHR	scaffold00005:-:3488396-3488437					KB664599:+:789519-789560	77	4.7	1919.83	1.42	640.615	3		4	Testis
		STNVGSIYVADVANQTLGR	scaffold00005:-:3488438-3488494					KB664599:+:789462-789518	103	4.84	1965	-0.17	983.005	2		5	Testis; Fatbody; Midgut; Ovary
		QYWEAGNAEYVGR	scaffold00005:-:3489000-3489038	scaffold00005:3488774-3489125				KB664599:+:788918-788956	85	3.99	1542.71	10.74	771.861	2		2	Testis; Fatbody
		TPDQDRIEEK	scaffold00005:-:3489048-3489077					KB664599:+:788879-788908	-	3.22	1230.6	-0.34	410.87	3		1	Ovary
24	ASTEI01570	STTSTENISNESSR	scaffold00005:-:3719744-3719785	scaffold00005:3719634-3720443	Yes	exon extension	ASTE0001726	-	94	4.09	1512.68	-1.44	756.841	2		3	Testis; Ovary; Brain
		iLDIMNkPSIIGLAk	scaffold00005:-:3719786-3719830					-	55	4.52	2058.26	-3.86	1029.64	2	N-Term(iTRAQ4plex); K7(iTRAQ4plex); K15(iTRAQ4plex)	2	Ovary; Malpighian tubules; Midgut; Fatbody
		NMPSDDAINFVVK	scaffold00005:-:3720197-3720235					-	71	3.44	1449.71	0.81	725.356	2		2	Testis; Midgut
		NmPSDDAINFVVK	scaffold00005:-:3720197-3720235					-	64	2.49	1465.7	-1.15	733.352	2	M2(Oxidation)	1	Ovary
		NSITVNVLHGIPAEHR	scaffold00005:-:3720236-3720283					-	61	4.84	1756.95	1.52	586.321	3		1	Ovary
		ASQGTYYcIVITPENQER	scaffold00005:-:3720284-3720337					-	101	4.68	2129	1.27	1065	2	C8(Carbamidomethyl)	2	Ovary
25	ASTEI01466	AmNEAGTTESIAK	scaffold00005:2680151-2680189	scaffold00005:2680020-2681074	Yes	Annotated	ASTE002334	KB664977:-:246448-246486	65	3.05	1338.62	-1.27	669.813	2	M2(Oxidation)	2	Fatbody
		FKEHVETLVEEIVTTETVQEIER	scaffold00005:2680553-2680621					KB664977:-:246016-246084	76	9.12	2758.42	3.25	920.146	3		7	Thorax
		LDVSDVESVK	scaffold00005:2680640-2680669					-	78	3.18	1090.56	-1.48	545.784	2		3	Thorax; Salivary gland
		ASEFGPGEAPLR	scaffold00005:2680709-2680744					-	87	3.13	1230.61	-1.21	615.809	2		4	Fatbody; Legs; Salivary gland
		EGYANIVTEILTETDMDETQLAATAGFR	scaffold00005:2680880-2680963					-	128	8.31	3059.46	2.89	1020.49	3		27	Thorax
		STSSNTAITTITTNNTTVTK	scaffold00005:2683126-2683185	scaffold00005:2683018-2690686	No	Annotated	ASTE002333	-	79	4.68	2056.04	-1.38	1028.52	2		1	Male accessory glands
		VVPETALVTEEIFLSER	scaffold00005:2683516-2683566					-	72	3.84	1932.03	0.06	966.52	2		2	Male accessory glands
		YYPELVVPTESAR	scaffold00005:2684104-2684142					-	50	2.54	1523.78	0.97	762.391	2		4	Testis; Male accessory glands
		SEQASASFVPVQSHTVVTVEANEK	scaffold00005:2684761-2684832					-	74	5.05	2544.26	-0.7	848.757	3		3	Male accessory glands; Midgut
		SVLVQETIANVSASELEHVTPASQLAR	scaffold00005:2685010-2685090					-	149	8.7	2849.5	0.39	950.505	3		7	Legs; Male accessory glands; Proboscis
		IVSETTIYETLR	scaffold00005:2685121-2685156					-	80	3.4	1424.76	-2.11	712.884	2		1	Male accessory glands
		SQEDMVRPEQK	scaffold00005:2685157-2685189					-	42	3.23	1346.63	-1.6	673.821	2		1	Male accessory glands
		TVLVEETVTSEGVDR	scaffold00005:2685334-2685378					-	97	3.22	1633.83	0.25	817.418	2		1	Male accessory glands
		LEIQQTQGTSQASLK	scaffold00005:2685379-2685423					-	76	3.58	1631.86	-0.47	816.433	2		1	Male accessory glands
		SAITNVERPVEGLTVTEVISEQR	scaffold00005:2685514-2685582					-	65	5.61	2527.33	-0.82	843.116	3		1	Male accessory glands
		SVLIEEVQLSSR	scaffold00005:2685652-2685687					-	41	2.1	1359.75	-0.29	680.377	2		1	Male accessory glands
		TELTITEVIAEDR	scaffold00005:2685859-2685897					-	82	3.4	1489.77	-0.44	745.391	2		1	Male accessory glands
		EGFDVAEIAK	scaffold00005:2685904-2685933					-	-	2.31	1078.54	-0.25	539.774	2		1	Male accessory glands
		EQEKVDETVIK	scaffold00005:2686213-2686245					-	45	4.07	1317.69	-2.65	659.347	2		1	Male accessory glands
		SVTVEQVEAAESLDSMEQPASIESLANVR	scaffold00005:2686285-2686371					-	54	2.35	3089.49	-2.21	1030.5	3		1	Male accessory glands
		EKEGFSVADIAQDYVAK	scaffold00005:2686528-2686578					-	46	4.09	1869.92	-1.25	623.978	3		1	Male accessory glands
		EGFSVADIAQDYVAK	scaffold00005:2686534-2686578					-	73	3.39	1612.78	-1.94	806.895	2		1	Male accessory glands
		SVLVEETIANEDTSQLSQPTASVSK	scaffold00005:2686603-2686677					-	49	2.73	2633.31	-0.31	1317.16	2		1	Male accessory glands
		SAESLYEPQIGVIVTEINTGQK	scaffold00005:2686780-2686845					-	96	4.9	2376.23	-0.76	1188.62	2		3	Male accessory glands
		EGFNVAELAQDHTATPVAGHALK	scaffold00005:2686852-2686920					-	44	5.21	2376.19	-1.13	792.735	3		2	Male accessory glands
		SPQQILSSASVR	scaffold00005:2686972-2687007					-	61	3.22	1272.69	-1.32	636.848	2		3	Male accessory glands
		EKEGYSVQDIAQEHVIK	scaffold00005:2687488-2687538					-	50	4.24	1973	-0.58	658.337	3		1	Male accessory glands
		SVIVEEVQTSDVVGDVEELR	scaffold00005:2687563-2687622					-	130	5.88	2202.11	-0.84	1101.56	2		1	Male accessory glands
		EQEGYDVQQIASNYNAK	scaffold00005:2687806-2687856					-	76	3.64	1956.89	-0.04	978.95	2		2	Male accessory glands
		SALIEETLPIDDVK	scaffold00005:2687881-2687922					-	53	2.61	1542.83	0.56	771.917	2		1	Male accessory glands
		HAEPVMPHQTELQVTEVITEQK	scaffold00005:2688055-2688120					-	59	4.75	2544.27	-1.04	848.763	3		1	Male accessory glands
		EELVVTEVVcEQK	scaffold00005:2688403-2688441					-	53	3.22	1561.78	-0.78	781.392	2	C10(Carbamidomethyl)	2	Male accessory glands
		ESEGFDVQEIASGYSAHLVPSQILK	scaffold00005:2688442-2688516					-	35	5.74	2704.35	1.48	902.122	3		1	Male accessory glands
		ALVNELEHEQK	scaffold00005:2688592-2688624					-	46	3.02	1309.67	-2.22	655.34	2		3	Male accessory glands
		TVQETMVYEMTLEKPAAQAPEQK	scaffold00005:2688625-2688693					-	88	4.47	2622.28	-0.23	874.764	3		1	Male accessory glands
		TDSLQETIK	scaffold00005:2688919-2688945					-	56	2.41	1034.54	-0.87	517.771	2		1	Male accessory glands
		SETTILEDITNLVQDDR	scaffold00005:2688946-2688996					-	118	4.7	1961.97	-0.34	981.486	2		1	Male accessory glands
		DFHAQALSGAEPMR	scaffold00005:2689111-2689152					-	87	4.16	1529.71	-1.56	510.576	3		2	Male accessory glands
		SIIVEEVHVSHDTPQLSTKPGQR	scaffold00005:2689153-2689221					-	89	5.87	2557.34	-0.49	853.117	3		2	Male accessory glands
		QHLELNEQTAK	scaffold00005:2689621-2689653					-	62	3.33	1310.67	-0.45	655.838	2		2	Male accessory glands
		TVSNLFVSTTTETVLGEGLDR	scaffold00005:2690080-2690142					-	126	5.48	2239.15	-0.01	1120.08	2		4	Male accessory glands
		SDFSLQSEAQTASMK	scaffold00005:2690143-2690187					-	73	4.35	1629.74	0.33	815.375	2		1	Male accessory glands
		IELAQEPEQR	scaffold00005:2690458-2690487					-	65	2.39	1212.62	-0.47	606.814	2		2	Male accessory glands
26	ASTEI01621	VFGEGLKSNDLQSLYYASVNAVLPAGDVINTcK	scaffold00005:4195373-4195471					KB664599:-:42226-42324	49	4.92	3542.82	10.5	1181.61	3	C32(Carbamidomethyl)	2	Salivary gland
		SNDLQSLYYASVNAVLPAGDVINTcK	scaffold00005:4195394-4195471					KB664599:-:42226-42303	45	2.01	2812.4	6.11	1406.7	2	C25(Carbamidomethyl)	1	Salivary gland
		SNDLQSLYYASVNAVLPAGDVINTcKR	scaffold00005:4195394-4195474					KB664599:-:42223-42303	95	7.58	2968.5	6.76	1484.76	2	C25(Carbamidomethyl)	20	Brain; Antennae; Fatbody; Male accessory glands; Malpighian tubules; Maxillary palps; Midgut; Ovary; Salivary gland; Testis; Thorax; Pupae
27	ASTEI01279	ELMNDIITNcR	scaffold00005:403656-403688	scaffold00005:403647-403698	Yes	Annotated	ASTE005811	KB664289:+:75428-75460	39	1.45	1378.65	0.1	689.826	2	C10(Carbamidomethyl)	1	Brain
28	ASTEI04121	STPQPTTEQPVQTK	scaffold00020:+:1829904-1829945	scaffold00020:1829847-1830140	Yes	novel exon	ASTE005222	KB664522:-:361979-362020	22	2.6	1541.78	2.17	771.396	2		1	Brain
29	ASTEI04128	qGELFDYLTSVVTLSEk	scaffold00020:+:1860281-1860331	scaffold00020:1860219-1860503	Yes	Annotated	ASTE005218	KB664522:-:331585-331635	39	5.16	2217.17	-7.04	739.729	3	N-Term(iTRAQ4plex); K17(iTRAQ4plex)	1	Ovary; Malpighian tubules; Midgut; Fatbody
		qIFEGVDYIHSk	scaffold00020:+:1860353-1860388					KB664522:-:331528-331563	46	5.39	1723.93	-0.15	575.313	3	N-Term(iTRAQ4plex); K12(iTRAQ4plex)	1	Midgut
30	ASTEI04541	QEGLIPWNFVAEDR	scaffold00024:-:22465-22506	scaffold00024:22448-22661				-	75	4.12	1673.83	-1.16	837.417	2		3	Brain; Midgut
		EETDVSFVKGDR	scaffold00024:-:22567-22602					-	74	4.04	1381.66	0.44	691.334	2		2	Brain
		EETDVSFVK	scaffold00024:-:22576-22602					-	70	1.73	1053.51	1.39	527.259	2		3	Brain; Testis
		IVVALYNYNAR	scaffold00024:-:22603-22635					-	64	3.12	1295.71	2.12	648.36	2		2	Brain
31	ASTEI03906	TGEPIETGIIATHEPTLRPHTELFR	scaffold00018:+:1702967-1703041	scaffold00018:1,702,949-1,703,075	Yes	exon extension	ASTE008238	KB665066:+:91318-91392	10	4.91	2815.49	5.28	563.904	5		2	Brain
		VGNTVYTIEER	scaffold00018:+:1703042-1703074					KB665066:+:91393-91425	76	4.18	1280.65	-0.31	640.828	2		4	Brain; Antennae; Ovary
32	ASTEI04229	VDAcTPGFR	scaffold00021:-:1480246-1480272	scaffold00021:1480224-1480288	Yes	novel exon	ASTE011252	KB665287:+:931421-931447	57	1.84	1022.47	-1.3	511.739	2	C4(Carbamidomethyl)	1	Testis
33	ASTEI03947	YNTDDSISIEDTLEETGWK	scaffold00019:+:411284-411340	scaffold00019:411,233-411,443	Yes	novel exon	ASTE003162	KB664489:-:80970-81026	104	6.23	2215.98	-3.84	1108.49	2		2	Midgut; Ovary
34	ASTEI04238	NRPKPSLPMPSK	scaffold00021:-:1556143-1556178	scaffold00021:1556094-1556222	Yes	Annotated	ASTE011245	KB665287:+:857687-857722	43	4.86	1351.75	0.01	451.255	3		2	Brain
35	ASTEI03958	TLTENGYQVNLR	scaffold00019:+:642003-642038	scaffold00019:641,969-642,150	Yes	Annotated	ASTE007685	-	75	3.64	1407.73	3.38	704.367	2		3	Testis
		cSPVNEQPASSDGR	scaffold00019:+:642126-642167					-	82	2.89	1503.66	4.64	752.332	2	C1(Carbamidomethyl)	1	Testis
36	ASTEI02702	YEDSPWQASR	scaffold00010:+:3337127-3337156					-	80	3.13	1238.54	-0.24	619.775	2		4	Brain
37	ASTEI04491	EIENASDAYTTR	scaffold00023:-:1510709-1510744	scaffold00023:1510709-1511175	Yes	novel exon	ASTE004364	KB665121:+:887081-887116	67	2.87	1369.62	0.83	685.316	2		4	Brain; Testis; Fatbody
38	ASTEI03781	LHTGETPFQcTYcQK	scaffold00017:-:968462-968506	scaffold00017:968424-968507	Yes	Annotated	ASTE010752	KB664555:+:379931-379975	35	3.97	1869.82	-3.97	623.944	3	C10(Carbamidomethyl); C13(Carbamidomethyl)	1	Ovary
39	ASTEI03576	GYDGSYSGSGGGGR	scaffold00015:2084987-2085028	scaffold00015:2084975-2085040	Yes	Annotated	ASTE000260	-	78	3.88	1276.52	0.6	638.763	2		2	Brain
40	ASTEI05606	TSVNNcNQQTANIIK	scaffold00032:+:818481-818525	scaffold00032:818474-818623	Yes	novel exon	ASTE011021	-	103	4.67	1704.83	0.65	852.921	2	C6(Carbamidomethyl)	2	Testis
		LNNLAEGHQR	scaffold00032:+:818544-818573					KB664312:+:84526-84555	68	4.11	1151.59	1.34	576.3	2		9	Testis
		YcELLADR	scaffold00032:+:818595-818618					KB664312:+:84577-84600	54	-	1039.49	1.38	520.248	2	C2(Carbamidomethyl)	1	Testis
41	ASTEI05720	DIGYSYNHSR	scaffold00033:-:466849-466878	scaffold00033:466785-466889	Yes	novel exon	ASTE009763	-	-	2.9	1211.54	-2.23	404.519	3		2	Brain
42	ASTEI05738	SPNYPTVGVQPDIISSNDIK	scaffold00033:-:730601-730660	scaffold00033:730601-730812	Yes	novel exon	ASTE008843	KB664553:-:160253-160312	101	5.76	2144.09	0.97	1072.55	2		2	Midgut; Salivary gland
		IALEDWFNVPEQLK	scaffold00033:-:731169-731210	scaffold00033:730886-731323				-	73	3.6	1701.89	2.2	851.448	2		4	Brain; Salivary gland
		GcLVYPVR	scaffold00033:-:731214-731237					-	42	1.57	963.507	-1.25	482.257	2	C2(Carbamidomethyl)	1	Brain
43	ASTEI05295	YSLENcPR	scaffold00029:-:2023942-2023965	scaffold00029:2,023,941-2,024,017	No	novel exon	ASTE003349	-	41	2.01	1038.47	2.23	519.738	2	C6(Carbamidomethyl)	4	Testis
44	ASTEI05856	NDSANNSILLK	scaffold00034:+:1194498-1194530	scaffold00034:1194496-1194574	Yes	Annotated	ASTE008459	KB665043:+:71586-71618	93	4.04	1188.62	-1.6	594.814	2		6	Antennae; Fatbody; Malpighian tubules
45	ASTEI05722	AVMTYVSSYYHcFSGAQK	scaffold00033:+:498515-498568	scaffold00033:498483-498568	Yes	novel exon	ASTE009761	KB664631:-:61874-61927	67	5.27	2098.95	8.57	1049.98	2	C12(Carbamidomethyl)	2	Salivary gland
46	ASTEI05881	DSAFLDIMNHSFFK	scaffold00034:-:1473962-1474003	scaffold00034:1473944-1474138	Yes	Annotated	ASTE008485	KB665043:-:349154-349195	58	2.33	1671.78	-0.88	836.395	2		2	Brain
		dSAFLDIMNHSFFk	scaffold00034:-:1473962-1474003					KB665043:-:349154-349195	60	6.99	1959.99	2.46	654.002	3	N-Term(iTRAQ4plex); K14(iTRAQ4plex)	3	Ovary; Malpighian tubules; Midgut; Fatbody
		LTDYGmcK	scaffold00034:-:1474542-1474565			novel exon		KB665043:-:349734-349757	37	2.07	1003.42	-1.36	502.214	2	M6(Oxidation); C7(Carbamidomethyl)	2	Brain; Midgut
		LTDYGMcK	scaffold00034:-:1474542-1474565					KB665043:-:349734-349757	42	2.36	987.427	-0.16	494.217	2	C7(Carbamidomethyl)	3	Brain; Midgut
		LDNVLLDHEGHIK	scaffold00034:-:1474566-1474604					KB665043:-:349758-349796	88	5.44	1502.79	-1.16	751.901	2		8	Brain; Midgut; Salivary gland
		DLKLDNVLLDHEGHIK	scaffold00034:-:1474566-1474613					KB665043:-:349758-349805	-	3.33	1858.99	-5.41	620.336	3		1	Testis
		RLPEEHAR	scaffold00034:-:1474677-1474700					KB665043:-:349869-349892	66	3.72	1007.54	0.21	336.518	3		6	Testis
		GGDLMFHMQR	scaffold00034:-:1474707-1474736					KB665043:-:349899-349928	38	1.82	1191.54	0.33	397.852	3		1	Brain
		ALVTDDEDIDWVQTEK	scaffold00034:-:1474935-1474982	scaffold00034:1474864-1475070				KB665043:-:350127-350174	126	5.07	1876.89	2.53	938.947	2		14	Brain; Testis; Fatbody; Midgut; Ovary; Salivary gland
		VLMVELK	scaffold00034:-:1475022-1475042					-	45	1.26	831.5	-0.87	416.254	2		2	Brain; Testis
47	ASTEI05747	SQGAVHGSEFPSESR	scaffold00033:-:790531-790575	scaffold00033:790532-790579	Yes	novel exon	ASTE008852	KB664553:-:233836-233880	93	4.87	1574.72	-0.1	787.863	2		4	Brain
48	ASTEI07540	IVEKEPSK	scaffold00055:-:1090685-1090708	scaffold00055:1,090,666-1,090,870	Yes	novel exon	ASTE008889	KB664476:-:430154-430177	51	2.24	929.529	-1	465.268	2		2	Testis
49	ASTEI07489	DGSLAAAAPSVSSSPGQVYHcYK	scaffold00055:-:153663-153731	scaffold00055:153,542-153,886	Yes	novel exon	ASTE007876	KB664551:+:4361-4429	56	5.91	2352.09	-0.44	784.702	3	C21(Carbamidomethyl)	1	Ovary
		ILAQPSSVSTTDSEPGAAALPER	scaffold00055:-:153735-153803					KB664551:+:4289-4357	137	4.96	2297.16	-0.06	1149.08	2		3	Brain; Ovary; Testis
50	ASTEI06691	GTVNcDDEQTNPAPPQAQVcVcVVHNK	scaffold00043:-:403308-403388	scaffold00043:403259-403454	Yes	Annotated	ASTE007648	-	54	4.57	3037.35	-1.98	1013.12	3	C5(Carbamidomethyl); C20(Carbamidomethyl); C22(Carbamidomethyl)	2	Midgut
51	ASTEI07490	GRYAKEPDNASK	scaffold00055:+:158012-158047	scaffold00055:157,995-158,089	Yes	protein extension	ASTE011789	KB664551:-:53-88	47	-	1335.66	-0.97	445.893	3		1	Malpighian tubules
		YAKEPDNASK	scaffold00055:+:158018-158047					KB664551:-:53-82	59	3.07	1122.54	-0.08	561.775	2		4	Testis; Midgut
52	ASTEI07561	TLQEDSSTTATTVSNTGGSK	scaffold00056:+:30219-30278	scaffold00056:30200-30575	Yes	protein extension	ASTE009339	KB664431:-:197527-197586	144	5.25	1984.93	-1.61	992.967	2		11	Antennae; Maxillary palps; Midgut; Proboscis; Salivary gland
53	ASTEI07618	LNPQHcVPTLVDNGFALWESR	scaffold00056:+:683813-683875	scaffold00056:683801-684322	No	novel exon	ASTE004110	-	85	7.36	2453.23	11.85	818.416	3	C6(Carbamidomethyl)	3	Legs; Proboscis
		AIMcYLVEK	scaffold00056:+:683876-683902					-	33	2.13	1126.58	10.8	563.792	2	C4(Carbamidomethyl)	3	Legs; Proboscis; Testis
		SWAEAARPYFDK	scaffold00056:+:684278-684313					-	53	4.76	1440.7	9.59	720.856	2		7	Testis; Legs; Proboscis
54	ASTEI08135	cVGIYQITTPNHFcAEDVVQR	scaffold00062:+:691209-691271	scaffold00062:691150-691368	Yes	Annotated	ASTE003621	-	90	6.14	2507.19	3.62	1254.1	2	C1(Carbamidomethyl); C14(Carbamidomethyl)	4	Midgut; Pupae
		SNVcNGDLGAGFVVSER	scaffold00062:+:691272-691322					-	124	4.27	1780.83	-0.66	890.917	2	C4(Carbamidomethyl)	8	Midgut; Pupae
55	ASTEI09308	LcTFFENLGWK	scaffold00088:-:549490-549522	scaffold00088:549490-549557	Yes	Annotated	ASTE007096	KB664597:-:176090-176122	74	2.78	1414.69	3	707.847	2	C2(Carbamidomethyl)	7	Brain; Male accessory glands; Malpighian tubules; Ovary; Salivary gland
56	ASTEI04867	fNAAVNVIR	scaffold00026:-:1026199-1026225	scaffold00026:1026183-1026988	Yes	Annotated	ASTE003998	KB665065:+:1186714-1186740	39	-	1147.67	1.49	574.34	2	N-Term(iTRAQ4plex)	1	Midgut
57	ASTEI05123	QITcPSGLAFDIEK	scaffold00028:+:1547916-1547957	scaffold00028:1547894-1548006	Yes	novel exon	ASTE007370	KB664499:+:916640-916681	61	4.57	1578.78	-4.67	789.892	2	C4(Carbamidomethyl)	3	Haemolymph; Legs; Pupae
58	ASTEI09419	TPPELLYSSYR	scaffold00092:-:7094-7126	scaffold00092:7090-7192	Yes	Annotated	ASTE000800	KB665210:+:221095-221127	69	3.42	1325.67	0.19	663.341	2		6	Thorax; Brain; Salivary gland
		LDPLGINSADLDDK	scaffold00092:-:7127-7168					KB665210:+:221053-221094	101	4.97	1485.74	-0.57	743.375	2		10	Thorax; Brain; Ovary; Testis
		lDPLGINSADLDDk	scaffold00092:-:7127-7168					KB665210:+:221053-221094	98	4.53	1773.94	-1.32	887.476	2	N-Term(iTRAQ4plex); K14(iTRAQ4plex)	1	Ovary; Malpighian tubules; Midgut; Fatbody
59	ASTEI09453	TDGKNLINEWK	scaffold00092:+:598263-598295	scaffold00092:598188-598337	Yes	Annotated	ASTE008984	KB664345:+:258629-258661	70	4.23	1317.68	-0.33	659.343	2		3	Larvae; Pupae
		NLINEWK	scaffold00092:+:598275-598295					KB664345:+:258641-258661	40	-	916.488	-0.51	458.748	2		2	Larvae; Pupae
		nLINEWk	scaffold00092:+:598275-598295					KB664345:+:258641-258661	28	-	1204.7	5.11	402.238	3	N-Term(iTRAQ4plex); K7(iTRAQ4plex)	1	Ovary; Malpighian tubules; Midgut; Fatbody
60	ASTEI08441	IVGGQYAEDTQIPYQIALFYR	scaffold00068:-:300895-300957	scaffold00068:300812-301241	Yes	Annotated	ASTE009202	KB664577:-:293610-293672	118	4.9	2445.24	-1.21	1223.12	2		3	Midgut; Pupae
61	ASTEI08657	aLcALIGNA	scaffold00073:-:37279-37305	scaffold00073:37068-37332	Yes	novel exon	ASTE002876	-	43	-	1035.54	-1.71	518.275	2	N-Term(iTRAQ4plex); C3(Methylthio)	2	Ovary; Malpighian tubules; Midgut; Fatbody
62	ASTEI10797	DDTYTAHAGAK	scaffold00165:+:84408-84440	scaffold00165:84148-84734	Yes	protein extension	ASTE008548	-	35	2.99	1149.52	2.55	575.264	2		1	Testis
		WTAPEGLAYNK	scaffold00165:+:84453-84485					-	48	2.24	1249.62	-0.06	625.314	2		1	Brain
63	ASTEI10811	GIGWYAELLR	scaffold00166:-:73601-73630	scaffold00166:73466-73670	Yes	novel gene		KB664750:+:32288-32317	48	1.95	1177.64	-1.2	589.321	2		1	Brain
64	ASTEI08310	ERTQYFAELNDAR	scaffold00065:-:807244-807282					KB664461:+:220678-220716	85	5.71	1612.77	1.78	806.891	2		21	Fatbody; Legs; Male accessory glands; Malpighian tubules; Midgut; Ovary; Proboscis
65	ASTEI07287	DTImQTALK	scaffold00051:-:1056790-1056816	scaffold00051:-:1053276-1061603	Yes	novel gene		KB664456:+:27175-27201	50	-	1036.53	0.33	518.771	2	M4(Oxidation)	1	Brain
		DTIMQTALK	scaffold00051:-:1056790-1056816					KB664456:+:27175-27201	42	-	1020.54	0.37	510.774	2		1	Antennae
66	ASTEI07239	SPPLVmYIFTLDTK	scaffold00051:+:433242-433283	scaffold00051:+:433242-433356	Yes	Annotated	ASTE000760	KB665232:-:173794-173835	78	4.01	1640.87	4.49	820.938	2	M6(Oxidation)	6	Testis; Male accessory glands; Proboscis
		SPPLVMYIFTLDTK	scaffold00051:+:433242-433283					KB665232:-:173794-173835	89	4.85	1624.87	-0.25	812.936	2		26	Antennae; Fatbody; Head; Male accessory glands; Malpighian tubules; Ovary; Proboscis; Pupae; Salivary gland; Testis
67	ASTEI07259	ITGLDPANPcFNEGESLSGIQR	scaffold00051:+:524288-524353	scaffold00051:+:524211-524445	Yes	Annotated	ASTE000739	KB665232:-:83257-83322	109	5.53	2375.13	0.71	1188.07	2	C10(Carbamidomethyl)	18	Testis; Antennae; Fatbody; Male accessory glands; Maxillary palps; Midgut; Proboscis
		gDADFVDIIHTNAk	scaffold00051:+:524354-524395					KB665232:-:83215-83256	16	4.57	1803.94	-3.09	601.986	3	N-Term(iTRAQ4plex); K14(iTRAQ4plex)	1	Ovary; Malpighian tubules; Midgut; Fatbody
		GDADFVDIIHTNAK	scaffold00051:+:524354-524395					KB665232:-:83215-83256	84	5.08	1515.76	8.58	758.382	2		23	Antennae; Fatbody; Haemolymph; Male accessory glands; Maxillary palps; Proboscis
68	ASTEI07319	LSFGWYR	scaffold00052:-:472954-472974	scaffold00052:-:472796-472975	Yes	exon extension	ASTE009751	KB664955:+:716477-716497	39	-	928.467	-1.07	464.737	2		2	Malpighian tubules
69	ASTEI10995	INSLEEEKYDLEYVVKR	scaffold00224:+:10885-10935	Exon 3 : scaffold00224:10847-10947				KB664768:-:31367-31417	95	5.5	2127.1	1.3	1064.05	2		9	Legs; Male accessory glands; Proboscis
		WDLEYEVRK	scaffold00224:+:17534-17560					KB664768:-:13700-13726	47	3.09	1237.62	1.13	619.315	2		2	Thorax
70	ASTEI08159	cFDILGLkPVHk	scaffold00062:+:922190-922225	scaffold00062:922121-922228	No	novel exon	ASTE003651	-	24	4.68	1848.07	4.12	462.772	4	N-Term(iTRAQ4plex); C1(Methylthio); K8(iTRAQ4plex); K12(iTRAQ4plex)	2	Ovary; Malpighian tubules; Midgut; Fatbody
71	ASTEI07562	FVVNLAYAYETK	scaffold00056:+:76883-76918					KB664431:-:137609-137644	96	2.34	1417.74	-0.5	709.371	2		2	Brain
		FHIYNMGGEPGFELSR	scaffold00056:+:77107-77154	scaffold00056:77093-77341				KB664431:-:137368-137415	80	4.37	1853.86	-0.14	618.626	3		3	Brain
		FHIYNmGGEPGFELSR	scaffold00056:+:77107-77154					KB664431:-:137368-137415	37	2.26	1869.86	0.1	623.958	3	M6(Oxidation)	1	Brain
		FYAAEVVcGLEHLHQQGIVYR	scaffold00056:+:77161-77223					KB664431:-:137299-137361	69	6.05	2489.24	-0.58	830.418	3	C8(Carbamidomethyl)	3	Brain
		DcKPENILLDDHGHVR	scaffold00056:+:77224-77271					KB664431:-:137251-137298	56	5.98	1917.92	-0.03	480.236	4	C2(Carbamidomethyl)	6	Brain
72	ASTEI08359	VVGAYDKVTADK	scaffold00066:-:701260-701295	scaffold00066:701260-701370	Yes	Annotated	ASTE003817	KB664561:+:292459-292494	80	3.74	1265.67	-0.5	633.34	2		7	Thorax; Testis; Brain; Malpighian tubules; Midgut
73	ASTEI10970	TIPDNFLSSAANLLR	scaffold00206:+:2452-2496	scaffold00206:2427-2498	Yes	protein extension	ASTE009328	-	64	3.32	1631.88	2.21	816.443	2		1	Male accessory glands
74	ASTEI01801	KSSGDYYAMK	scaffold00006:+:2901962-2901991	scaffold00006:+:2901935-2902831	No	exon extension	ASTE009692	-	33	2.91	1149.53	2.5	575.267	2		1	Testis
		DLKPENLLVDYR	scaffold00006:+:2902271-2902306					-	70	3.94	1474.79	2.98	737.901	2		6	Testis
75	ASTEI08688	VSTISQLVQQMFR	scaffold00073:425680-425718	scaffold00073:425,544-425,768	Yes	novel exon	ASTE002912	-	86	3.47	1536.82	0.73	768.914	2		4	Malpighian tubules; Ovary; Salivary gland
		VSTISQLVQQmFR	scaffold00073:425680-425718					-	53	-	1552.82	0.93	776.912	2	M11(Oxidation)	1	Malpighian tubules
76	ASTEI08999	DIPELTAEDTIR	Scaffold00080:264836-265011	scaffold00080:264,777-265,011	No	Annotated exon	ASTE000102	-	67	2.49	1372.69	-0.38	686.851	2		2	Brain
77	ASTEI08990	SSSSASASAGVK	scaffold00080:49956-49991	Scaffold00080:49,859-50,044	Yes	Annotated exon	ASTE000090	KB664954:-:650090-650125	65	-	1038.51	-0.44	519.757	2		1	Ovary
78	ASTEI09052	LLGNcVDVLLR	scaffold00081:+:413819-413851	Scaffold00081:413,794-414,477	Yes	novel exon	ASTE010177	KB665154:-:183087-183119	89	3.37	1271.71	-0.71	636.36	2	C5(Carbamidomethyl)	8	Malpighian tubules; Midgut
		YIDDAVYEMIR	scaffold00081:+:413870-413902					KB665154:-:183036-183068	82	3.1	1387.66	-0.08	694.332	2		11	Midgut
		YIDDAVYEmIR	scaffold00081:+:413870-413902					KB665154:-:183036-183068	62	2.77	1403.65	0.42	702.33	2	M9(Oxidation)	5	Midgut
79	ASTEI11241	SSSMSSLENNAMEAVTcLAFADSYVK	scaffold00847:+:2008-2085	scaffold00847:1976-2092	Yes	Annotated exon	ASTE001165	KB665176:+:1190771-1190848	73	3.18	2812.25	-0.09	938.087	3	C17(Carbamidomethyl)	1	Brain
80	ASTEI07389	VQFGDTEFEVPDR	scaffold00053:-:1219959-1219997	scaffold00053:1,219,912-1,220,126	Yes	Annotated	ASTE007551	KB664430:+:418441-418479	107	3.86	1538.71	0.85	769.86	2		7	Testis; Fatbody; Midgut; Ovary; Salivary gland
81	ASTEI07464	QSAELENQMVSVER	scaffold00054:+:1185913-1185954	scaffold00054:1,185,451-1,186,553	Yes	Annotated	ASTE001420	KB664622:+:1003573-1003614	96	4.37	1619.77	-0.07	810.388	2		1	Midgut
		SSLIQALFR	scaffold00054:+:1186168-1186194					KB664622:+:1003828-1003854	-	2.69	1034.6	-1.71	517.802	2		2	Testis; Pupae
		LAPFEGNIEIDDIDTK	scaffold00054:+:1186195-1186242					KB664622:+:1003855-1003902	47	1.34	1789.89	2.12	895.448	2		1	Salivary gland
		kDDELWNALDEVELk	scaffold00054:+:1186348-1186392					KB664622:+:1004008-1004052	43	5.24	2249.21	1.19	750.407	3	N-Term(iTRAQ4plex); K1(iTRAQ4plex); K15(iTRAQ4plex)	1	Ovary; Malpighian tubules; Midgut; Fatbody
		sTmLQVILGELELDEGR	scaffold00054:+:1193539-1193589	scaffold00054:1,193,459-1,193,934	Yes	Annotated	AGAP001420	KB664622:+:1011251-1011301	-	2.53	2063.08	1.49	688.366	3	N-Term(iTRAQ4plex); M3(Oxidation)	1	Ovary; Malpighian tubules; Midgut; Fatbody
		ISIIPQDPILFSGTVR	scaffold00054:+:1198589-1198636	scaffold00054:1198155-1198869	Yes	Annotated	AGAP001420	KB664622:+:1016306-1016353	49	1.2	1756	-0.01	878.504	2		1	Salivary gland
82	ASTEI07419	cDVDGVEVGVVYK	scaffold00054:+:485341-485379	scaffold00054:485,243-485,396	Yes	novel exon	ASTE001375	KB664622:+:305007-305045	83	3.47	1438.69	0.14	719.848	2	C1(Carbamidomethyl)	2	Ovary
		IDCSDGSDERDCKPVGCR	scaffold00054:+:476847-476883
		IDCSDGSDERDCKPVGCR	scaffold00054:+:477165-477181
83	ASTEI10005	DTEQcLAVAVQDAATEFNDMLVK	scaffold00108:-:426517-426585	scaffold00108:425509-426678	Yes	Annotated	ASTE006254	-	77	5.76	2568.21	3.62	856.74	3	C5(Carbamidomethyl)	3	Midgut
		DTEQcLAVAVQDAATEFNDmLVK	scaffold00108:-:426517-426585					-	90	6.66	2584.19	1.64	862.07	3	C5(Carbamidomethyl); M20(Oxidation)	8	Midgut
		dAAVLIGQTSR	scaffold00108:-:426607-426639					KB664519:+:100452-100484	49	3.71	1274.72	3.18	637.865	2	N-Term(iTRAQ4plex)	2	Midgut
		DAAVLIGQTSR	scaffold00108:-:426607-426639					KB664519:+:100452-100484	-	3.58	1130.62	0.03	565.812	2		2	Testis
		HIEAGAEK	scaffold00108:-:426825-426848	scaffold00108:426741-427238				KB664519:+:100243-100266	-	3.62	854.437	0.28	427.722	2		1	Testis
		VSPcFAEVPQEIR	scaffold00108:-:426939-426977					KB664519:+:100114-100152	73	2.96	1531.76	2.36	766.384	2	C4(Carbamidomethyl)	11	Testis; Midgut
		SKVSPcFAEVPQEIR	scaffold00108:-:426939-426983					KB664519:+:100108-100152	81	3.85	1746.89	0.72	873.946	2	C6(Carbamidomethyl)	1	Midgut
		EALVSLASLQQNADK	scaffold00108:-:427089-427133					KB664519:+:99958-100002	90	2.45	1586.83	-3.74	793.92	2		2	Salivary gland
		eALVSLASLQQNADk	scaffold00108:-:427089-427133					KB664519:+:99958-100002	70	4.29	1875.04	0.08	938.025	2	N-Term(iTRAQ4plex); K15(iTRAQ4plex)	1	Midgut
84	ASTEI06868	LIGELYHPDDSQL	scaffold00045:+:674621-674659	scaffold00045:674590-674676	Yes	novel exon	ASTE008217	KB664545:-:13308-13346	36	3.3	1499.74	-0.31	750.372	2		11	Male accessory glands; Midgut; Proboscis; Testis; Fatbody; Ovary; Salivary gland
85	ASTEI03065	TIATIDVHAR	scaffold00013:+:98194-98223	scaffold00013:98153-98294	Yes	novel exon	ASTE006827	-	64	3.38	1096.61	-0.09	548.809	2		3	Testis
		DSILDAHEFGWESQLR	scaffold00013:+:98248-98295					-	33	6.13	1902.9	-0.41	634.971	3		3	Testis
86	ASTEI03426	EIPSSSTSHELK	scaffold00014:+:2294884-2294919	scaffold00014:2294863-2294986	Yes	novel exon	ASTE007321	-	48	4.19	1314.66	1.94	657.832	2		5	Brain
87	ASTEI10335	TLATQEITR	scaffold00126:+:234481-234507	scaffold00126:234442-234566	Yes	annotated	ASTE003278	-	38	2.99	1032.57	-1.1	516.787	2		2	Midgut; Fatbody
		SIEKDQQTLR	scaffold00126:+:234538-234567					-	70	2.77	1217.65	-0.21	609.328	2		8	Testis; Head; Midgut; Salivary gland
88	ASTEI03953	TTGcVEGEcVR	scaffold00019:-:506542-506574	scaffold00019:-:498363-498441	Yes	novel exon	ASTE007690	-	90	3.71	1267.54	0.65	634.274	2	C4(Carbamidomethyl); C9(Carbamidomethyl)	4	Salivary gland; Testis; Midgut
		SGNPcDVGEEcEVQNHETVcVK	scaffold00019:-:498588-498653	scaffold00019:-:498594-498724				KB664463:+:452099-452164	65	6.97	2547.05	-2.1	849.688	3	C5(Carbamidomethyl); C11(Carbamidomethyl); C20(Carbamidomethyl)	2	Fatbody
		ScINGIcVDPcR	scaffold00019:-:498654-498689					KB664463:+:452063-452098	71	3.09	1450.62	-0.88	725.815	2	C2(Carbamidomethyl); C7(Carbamidomethyl); C11(Carbamidomethyl)	3	Salivary gland
89	ASTEI04035	ALMQAQQLYGGSGAIK	scaffold00019:-:2272291-2272338	scaffold00019:2272258-2272350	No	Annotated	ASTE009923	-	58	3.23	1635.85	0.2	818.43	2		1	Brain
90	ASTEI06528	dVDVLDNTLPQVLR	scaffold00041:-:822883-822924	scaffold00041:822859-823079	Yes	Annotated	ASTE009451	KB664457:+:403929-403970	67	4.99	1740.96	-3.13	870.982	2	N-Term(iTRAQ4plex)	2	Ovary; Malpighian tubules; Midgut; Fatbody
		DVDVLDNTLPQVLR	scaffold00041:-:822883-822924					KB664457:+:403929-403970	84	3.75	1596.86	-0.88	798.933	2		4	Malpighian tubules; Ovary
91	ASTEI00096	KTDVYLLDDPLSAVDAHVAK	scaffold00001:+:1435422-1435481	scaffold00001:1435400-1435610	Yes	Annotated	ASTE009978	KB664532:-:84335-84394	91	8.69	2170.14	-0.28	724.051	3		2	Testis; Malpighian tubules
		kTDVYLLDDPLSAVDAHVAk	scaffold00001:+:1435422-1435481					KB664532:-:84335-84394	61	7.71	2602.43	-5.52	868.149	3	N-Term(iTRAQ4plex); K1(iTRAQ4plex); K20(iTRAQ4plex)	1	Ovary; Malpighian tubules; Midgut; Fatbody
		ILVTHQIHFLK	scaffold00001:+:1435548-1435580					KB664532:-:84236-84268	-	3.82	1348.81	2.55	450.276	3		2	Malpighian tubules

## Sheet: Table S5.3_Exon extensions
Supplemental Table S5.3 - A summary of results of protegenomic analysis
Exon extensions
Prasad et al., 2016. Integrating transcriptomic and proteomic data for accurate assembly and annotation of genomes
	Gene symbol	Peptide sequence	Genomic coordinates of identified peptide (Indian)	Category	Revised coordinates for the extended exon	Transcript evidence (Yes/No)	Category (according to SDA500)	Gene involved (in SDA500)	SDA500 coordinates	Mascot score	Sequest score	MH+ [Da]	Delta M (ppm)	m/z [Da]	Charge	Modifications	no. PSMs	Tissues
1	ASTEI00333	ALENYIGHTQNVLR	scaffold00001:5236043-5236084 (+)	exon extension	scaffold00001: 5235647-5236432	No	annotated	ASTE002796	-	79	5.15	1627.85	-1.34	814.43	2		15	Salivary gland
		DVNVWSGIGGALDR	scaffold00001:5236085-5236126 (+)						-	99	3.65	1458.73	0.03	729.87	2		6	Salivary gland
2	ASTEI04290	TTLLHmLKDDR	scaffold00022:-:350214-350246	exon extension	scaffold00022:-:350214-350301	Yes	Annotated	ASTE005679	KB664781:-:4514-4546	65	3.75	1358.71	0.62	453.575	3	M6(Oxidation)	12	Malpighian tubules; Testis; Antennae; Proboscis
		TTLHMLK	scaffold00022:-:350223-350246
3	ASTEI04331	VPVLGNILNMPGISR	scaffold00022:-:744295-744339	exon extension	scaffold00022:-:744295-744,429	Yes	Annotated	ASTE010014	KB664435:+:364642-364686	103	4.35	1579.9	0.4	790.453	2		12	Testis; Larvae; Legs; Maxillary palps; Proboscis
		RVPVLGNILNmPGISR	scaffold00022:-:744295-744342						KB664435:+:364639-364686	79	3.34	1752	0.34	584.67	3	M11(Oxidation)	1	Testis
		TVDWLAGESDRTTV	scaffold00022:-:744253-744294						KB664435:+:364687-364728	50	2.7	1549.75	-2.39	775.376	2		4	Maxillary palps; Midgut; Proboscis
		TVDWLAGESDR	scaffold00022:-:744262-744294						KB664435:+:364687-364719	85	3.3	1248.59	-0.26	624.796	2		14	Brain; Testis; Larvae; Male accessory glands; Maxillary palps; Midgut; Ovary; Proboscis; Salivary gland
4	ASTEI05125	sFMDSDGDGVGDLNGIASR	scaffold00028:-:1562451-1562507	exon extension	scaffold00028:1562124-1562647	Yes	exon extension	ASTE007372	KB664499:-:931186-931242	158	5.98	2056.94	0.83	1028.97	2	N-Term(iTRAQ4plex)	6	Ovary; Malpighian tubules; Midgut; Fatbody
5	ASTEI05228	NMQPQIDPSYNIIDTASGPQGPPSK	scaffold00029:-:1195682-1195756	exon extension	scaffold00029:1194893-1195813	Yes	Annotated	ASTE001486	KB664467:+:331489-331563	121	4.51	2655.27	-0.64	1328.14	2		16	Testis; Male accessory glands; Midgut; Ovary; Salivary gland
6	ASTEI01983	AINEDLEEVWEGTK	scaffold00007:2207151-2207192	exon extension	scaffold00007: 2207151-2207330	No	exon extension	ASTE001638	-	97	4.14	1632.78	0.94	816.892	2		1	Brain
7	ASTEI01906	HADNHIEATYDPR	scaffold00007:157370-157408	exon extension	scaffold00007:156925-157408	Present but Not supporting exon extension	exon extension	ASTE004557	KB664438:-:609608-609646	-	3.11	1538.7	1.5	513.572	3		1	Malpighian tubules
8	ASTEI01971	TASSSTAEVNEQK	scaffold00007:1920545-1920583	exon extension	scaffold00007:1920151-1920583	Yes	protein extension	ASTE000052	KB664921:+:817642-817680	78	4.03	1351.63	-0.57	676.32	2		2	Head
9	ASTEI01928	QGYAVENQFLPQR	scaffold00007:506499-506537	exon extension	scaffold00007:506187-506888	Yes but Not supporting extension	Annotated	ASTE004531	-	92	4.97	1549.78	1.56	775.393	2		6	Testis
10	ASTEI02130	ESGELALENGSLGR	scaffold00008:1182036-1182077	exon extension	scaffold00008:1181909-1182292	Yes	Annotated	ASTE010272	KB664655:+:569215-569256	62	3.55	1431.7	-3.44	716.355	2		2	Midgut; Ovary
11	ASTEI02132	TDDSGEADGFTIK	scaffold00008:1188860-1188898	joining of exons	scaffold00008:1188830-1191943	Yes	Annotated	ASTE010270	KB664655:+:562320-562358	93	4.78	1355.59	-0.96	678.301	2		7	Fatbody; Midgut
		EPNAQPNVGTLAMNFR	scaffold00008:-:1189760-1189807						KB664655:+:561411-561458	98	3.8	1758.86	1.47	879.935	2		9	Fatbody
12	ASTEI02160	IHVQNLHTADKPIK	scaffold00008:1558549-1558590	exon extension	scaffold00008:1557331-1558658	Yes	protein extension	ASTE010242	KB664655:+:166557-166598	25	2.07	1613.91	0.22	404.234	4		1	Brain
13	ASTEI06327	LLEAAGVPDLR	scaffold00039:391951-391983	exon extension	scaffold00039: 392735-391951	No	annotated	ASTE004845	KB664610:-:308995-309027	82	2.66	1153.66	-0.51	577.332	2		1	Testis
14	ASTEI06317	GSYSFTADDGQVYTVNYIADENGFQPEAPHLPK	scaffold00039:302010-302108	exon extension	scaffold00039: 301739-302108	No	exon extension	ASTE004834-	-	68	6.03	3630.68	2.63	1210.9	3		2	Antennae
15	ASTEI06528	EGEISESGTYQELMDK	scaffold00041:825093-825140	exon extension	scaffold00041: 824917-825742	Yes	annotated	ASTE009451	KB664457:+:401713-401760	120	4.76	1815.8	2.93	908.404	2		6	Testis; Midgut; Ovary; Salivary gland
		VLVTHGITYLPNTDK	scaffold00041:825156-825200	exon extension	scaffold00041: 824917-825742	Yes			KB664457:+:401653-401697	103	6.25	1670.93	11.65	835.969	2		27	Brain; Malpighian tubules; Salivary gland; Testis; Antennae; Fatbody; Maxillary palps; Ovary; Proboscis
		VIEAcALKPDIEmLPGGDmTEIGEK	scaffold00041:825375-825449	exon extension	scaffold00041: 824917-825742	Yes			KB664457:+:401404-401478	40	4.81	2748.32	1.52	916.778	3	C5(Carbamidomethyl); M13(Oxidation); M19(Oxidation)	2	Testis; Fatbody
		IAYVSQQAWIQNATLKDNILFGKPMDQR	scaffold00041:825462-825545	exon extension	scaffold00041: 824917-825742	Yes			KB664457:+:401308-401391	43	4.96	3248.7	2.1	812.929	4		5	Testis
16	ASTEI06611	LTDGGWASSQDTGLAmK	scaffold00042:1252490-1252540	exon extension	scaffold00042: 1252289-1252681	No	annotated	ASTE008727	KB664621:-:2532367-2532417	89	3.8	1753.8	-1.48	877.405	2	M16(Oxidation)	3	Maxillary palps; Proboscis; Salivary gland
17	ASTEI06828	NITQYDPVYPIVTNYLENVAK	scaffold00045:104662-104724	exon extension	scaffold00045: 104045-104785	Yes	exon extension	ASTE001222	KB664482:+:95005-95067	73	3.14	2454.25	-0.5	1227.63	2		4	Salivary gland
18	ASTEI00212	fQQTFHQVMVDLk	scaffold00001:-:3540591-3540629	exon extension	scaffold00001:3540380-3541323	Yes	exon extension	ASTE001450	KB664484:+:78041-78079	-	5.84	1909.02	-3.94	637.01	3	N-Term(iTRAQ4plex); K13(iTRAQ4plex)	1	Ovary; Malpighian tubules; Midgut; Fatbody
19	ASTEI00096	GCLIGIVGPVGSGK	scaffold00001:+:1435151-1435187	exon extension	scaffold00001:1434318-1435311
		QNILFGDELDQYR	scaffold00001:+:1435151-1435189	exon extension	scaffold00001:1434318-1435311	Yes			KB664532:-:84627-84665	98	4.08	1610.78	-0.02	805.894	2		5	Testis; Malpighian tubules; Salivary gland
		VcALQPDLAHLPAGDMTVIGER	scaffold00001:+:1435208-1435273	exon extension	scaffold00001:1434318-1435311	Yes			KB664532:-:84543-84608	55	4.7	2363.19	3.66	788.403	3	C2(Carbamidomethyl)	2	Testis; Malpighian tubules
		FFETNPSGR	scaffold00001:+:1436291-1436317	exon extension	scaffold00001:1435673-1,437,025	No			-	-	1.75	1054.49	-0.92	527.751	2		2	Brain; Testis
		SPIFTHIAATLNGLPTIR	scaffold00001:+:1436618-1436671	exon extension	scaffold00001:1435673-1,437,025	No			-	51	3.31	1922.08	-2.28	641.365	3		2	Malpighian tubules
		LPDASEAGGK	scaffold00001:+:1437221-1437247	exon extension	scaffold00001:1435673-1,437,025	No			-	26	2.88	944.465	-3.15	472.736	2		2	Testis
		SSIIAAFLR	scaffold00001:+:1436996-1437026	exon extension	scaffold00001:1435673-1,437,025	No
		SHISIIPQDPVLFSGTLR	scaffold00001:+:1437320-1437373	exon extension	scaffold00001:1435673-1,437,025	No			-	77	5.01	1980.09	0.79	990.55	2		12	Malpighian tubules; Testis; Salivary gland
		NLDPFEAYPDAALWR	scaffold00001:+:1437377-1437421	exon extension	scaffold00001:1435673-1,437,025	No			-	84	3.74	1777.85	-0.45	889.43	2		11	Malpighian tubules; Testis; Midgut
		ALELVELR	scaffold00001:+:1437422-1437445	exon extension	scaffold00001:1435673-1,437,025	No			-	67	2.08	942.564	2.03	471.786	2		5	Testis; Malpighian tubules
		ILVLDEATANVDPDTDR	scaffold00001:+:1437572-1437622	exon extension	scaffold00001:1435673-1,437,025	No			-	93	3.95	1856.93	1.99	928.967	2		4	Testis; Malpighian tubules; Midgut; Salivary gland
20	ASTEI08922	cGTAGVPGVYTNTAEYVDWIR	scaffold00079:41176-41238(+)	exon extension	scaffold00079: 40661-41238	Yes	exon extension	ASTE009036	KB665132:-:811489-811551	90	4.47	2329.1	1.47	1165.05	2	C1(Carbamidomethyl)	2	Testis
21	ASTEI09057	GYTHccSVPAAQK	scaffold 00081:772559-772597	exon extension	scaffold00081:772182- 772596	Yes	exon extension	ASTE003572	KB664440:+:490334-490372	-	3.95	1478.65	-0.25	739.829	2	C5(Carbamidomethyl); C6(Carbamidomethyl)	1	Haemolymph
22	ASTEI09042	QFVGFSDDDIFK	scaffold00081:282182-282217	exon extension	scaffold00081: 282182- 282244	Yes	Annotated	ASTE010186	KB665154:-:322389-322424	55	2.65	1417.67	1.9	709.337	2		1	Testis
23	ASTEI08960	KLLISTLIR	scaffold00079:671685-671711	exon extension	scaffold00079:671252-671731				KB665132:+:26039-26065	47	3.79	1056.71	-0.07	528.861	2		2	Thorax
24	ASTEI09047	DFFTcSSGDYLEQNPEVR	scaffold00081:357330-357383	exon extension	scaffold00081: 357331-358038	Yes	Annotated	ASTE010182	KB665154:-:247869-247922	87	4.93	2163.93	-0.16	1082.47	2	C5(Carbamidomethyl)	1	Midgut
25	ASTEI09063	QWVLTAAHCVQTTSPK	scaffold00082:233212-234359	joining of exon3 and Exon4	scaffold00082: 234172-234740	Yes	protein extension	ASTE006240
26	ASTEI09103	TSPFPYDPMIIPR	scaffold00083:326911-326949	exon extension-5'	scaffold00083: 326625-326960	Yes	Annotated	ASTE006193	KB664455:-:144202-144240	79	2.78	1533.78	0.36	767.392	2		3	Testis; Ovary
27	ASTEI09302	GDSmTASFHPSDHANIEAFK	scaffold00088:448398-448457	exon extension	scaffold00088:448220-448458	Yes	Annotated	ASTE007091	KB664597:-:34045-34104	86	5.96	2177.95	-2.42	1089.48	2	M4(Oxidation)	11	Testis; Antennae; Fatbody; Proboscis; Salivary gland; Maxillary palps
28	ASTEI09312	TAYLVQDAHNLLVADWSDIAYR	scaffold00088:-:583382-583447						-	43	4.3	2534.27	0.31	845.428	3		1	Antennae
29	ASTEI07672	GGGIAHGPR	scaffold00057:391808-391834	exon extension	scaffold00057:391187-392245	No	exon extension	ASTE006482	-	61	2.88	821.438	0.62	411.223	2		1	Testis
		sGTTHFYMLPFFNR	scaffold00057:391835-391876						KB664288:+:3166476-3166517	-	4.48	1861.9	-7.38	621.306	3	N-Term(iTRAQ4plex)	1	Ovary; Malpighian tubules; Midgut; Fatbody
30	ASTEI08305	LTSPATSPVGETGAVR	scaffold00065:763685-763732	exon extension	scaffold_00065:763756-763562	Yes	exon extension	ASTE007947	KB664461:+:265006-265053	91	4.18	1542.82	2.54	771.912	2		17	Brain; Testis; Antennae; Fatbody; Maxillary palps; Ovary; Salivary gland
31	ASTEI08768	VSGTDPIESTQVK	scaffold00074:862008-862046	exon extension	Exon 1 :scaffold_00074 862682-861531	Yes	protein extension	ASTE009873	-	63	-	1360.69	-0.92	680.851	2		1	Brain
		KVSGTDPIESTQVK	scaffold00074:862008-862049						-	58	3.91	1488.79	2.44	744.901	2		1	Brain
32	ASTEI08188	QIVEENVATVK	scaffold00063:-:146364-146396	exon extension	scaffold_00063:146444-146280	Yes	annotated	ASTE005316	KB665387:+:765714-765746	67	3.8	1229.68	3.56	615.343	2		13	Brain; Testis; Malpighian tubules; Midgut; Salivary gland; Legs
33	ASTE002595	RGTITHPGQVPR	scaffold00064:273931-273966	exon extension	Exon 4: scaffold_00064:273805-273969	Yes	exon extension	ASTE002595	-	-	3.66	1318.73	0.76	440.25	3		1	Brain
34	ASTEI08010	FPSLScQDAPADDGQSVASGATQATEEKA	scaffold00061:-:49352-49438	exon extension	scaffold_00061: 48666-49438	No	protein extension	ASTE005774	KB664710:-:704848-704934	82	7.71	2938.3	-0.59	980.105	3	C6(Carbamidomethyl)	15	Head; Maxillary palps; Proboscis
		FPSLScQDAPADDGQSVASGATQATEEK	scaffold00061:-:49355-49438						KB664710:-:704851-704934	90	5.81	2867.26	-1.73	956.424	3	C6(Carbamidomethyl)	6	Head
35	ASTEI08025	EDSRPVSAASGLADK	scaffold00061:+:498649-498693	exon extension	Exon 5: scaffold_00061: 492506-498711	No	annotated	ASTE006032	-	82	3.79	1502.74	-1.01	751.875	2		1	Brain
		EDSRPVSAASGLADKDPSEK	scaffold00061:+:498649-498708						-	72	6.7	2058.99	-0.21	687.003	3		7	Brain; Male accessory glands
36	ASTEI08719	nIQkGEDFVk	scaffold00074:-:167838-167867	exon extension	scaffold_00074: 168776-167838	Yes	exon extension	ASTE009825	KB664999:-:238795-238824	59	-	1609.93	0	805.467	2	N-Term(iTRAQ4plex); K4(iTRAQ4plex); K10(iTRAQ4plex)	1	Midgut
37	ASTEI08493	DQGPVcGGIccDAETER	scaffold00069:-:436356-436406	exon extension	scaffold00069:428315-436406	Yes	protein extension	ASTE001947	-	139	4.16	1923.77	1.03	962.386	2	C6(Carbamidomethyl); C10(Carbamidomethyl); C11(Carbamidomethyl)	2	Testis; Ovary
38	ASTEI08318	KGSVAGGGGGAGGGGGGGGGAGSVGGGGDADR	scaffold00065:-:947176-947271	exon extension	Exon 1: scaffold_00065:947580-946867	Yes	annotated	ASTE007932	KB664461:+:37335-37430	89	7.63	2330.04	-1.21	777.353	3		3	Antennae; Male accessory glands; Ovary
		aSGSAAGASGGGAAAGGAAAAVTEGGGGR	scaffold00065:-:947284-947370						KB664461:+:37236-37322	92	8.87	2318.12	0.09	773.378	3	N-Term(iTRAQ4plex)	1	Ovary; Malpighian tubules; Midgut; Fatbody
39	ASTEI07875	IMYDTAENDDFDR	scaffold00059:-:768886-768924	exon extension	scaffold00059:-:768921-768908	Yes	Annotated	ASTE003698	KB664444:+:1592686-1592724	78	2.12	1604.65	-0.55	802.83	2		1	Brain
40	ASTEI08328	SPMVATPGGPLVR	scaffold00066:-:45801-45839	exon extension	scaffold00066:-:45696-45878	Yes	Annotated	ASTE004376	KB664688:+:580578-580616	60	-	1281.7	0.54	641.353	2		1	Brain
41	ASTEI07956	SKNHIVSIPR	scaffold00060:-:593511-593540	exon extension	scaffold00060:593511-593625	Yes	annotated	ASTE000681	KB664510:-:2467615-2467644	51	4.39	1150.67	4.46	384.23	3		4	Testis; Haemolymph
42	ASTEI07132	KQHLISHQK	scaffold00049:1164391-1164417	exon extension	scaffold00049: 1162591-1163950	No	annotated	ASTE006779	-	50	4.03	1118.65	4.2	559.827	2		2	Testis
43	ASTEI07285	DFNDADMER	scaffold00051:1038498-1038524	exon extension	scaffold00051: 1038480-1038740	Yes	annotated	ASTE010520	KB664456:+:53441-53467	49	1.98	1112.43	-0.16	556.719	2		3	Salivary gland; Midgut; Testis
		FKEEEKPSWAK	scaffold00051:1038537-1038569						KB664456:+:53396-53428	67	3.7	1378.7	2.94	689.856	2		8	Testis; Proboscis
44	ASTEI07258	cPLIAcTDR	scaffold00051:-:510211-510237	exon extension	scaffold00051: 509265-511122	Yes	annotated	ASTE000741	KB665232:+:97401-97427	36	-	1105.5	-11.98	553.253	2	C1(Carbamidomethyl); C6(Carbamidomethyl)	1	Testis
		NSTEAAQMLVTTQK	scaffold00051:-:510331-510372						KB665232:+:97266-97307	79	3.98	1521.75	-7.34	761.377	2		2	Testis
45	ASTEI07327	FSNYGQVIR	scaffold00052:702214-702240	exon extension	scaffold00052: 702190 - 702846	No	annotated	ASTE009744	KB664955:+:451400-451426	64	-	1083.56	0.52	542.283	2		1	Larvae
46	ASTEI07728	DLSEAQEWcR	scaffold00057:-:1099452-1099481	exon extension	scaffold00057:-:1099443-1,105,351	Yes	exon extension	ASTE011722	KB664421:-:494410-494439	63	2.58	1293.55	-0.46	647.28	2	C9(Carbamidomethyl)	2	Midgut
47	ASTEI02221	GIYHNDNKTFLVWcNEEDHLR	scaffold00008:2460638-2460700	joining of exons	scaffold00008:2460183-2462098	Yes	annotated	ASTE009536	KB664400:+:682189-682251	66	9.2	2660.23	0.75	887.416	3	C14(Carbamidomethyl)	23	Thorax; Brain; Legs; Male accessory glands; Malpighian tubules; Midgut; Proboscis
48	ASTEI02284	SKLQSVDNSTSSESFLGK	scaffold00008:3562301-3562354	exon extension	scaffold00008:3562280-3562465	Yes	annotated	ASTE006812	KB664569:+:85098-85151	142	6.53	1913.97	10.7	957.486	2		6	Legs; Male accessory glands; Ovary; Salivary gland
49	ASTEI02304	YVIDGGVMERPENcPDK	scaffold00009:-:14625-14675	exon extension	scaffold00009:122442-123956	Yes			KB665143:-:18492-18542	24	-	1978.89	-3.03	660.303	3	C14(Carbamidomethyl)	1	Brain
50	ASTEI02288	DIYETDYYR	scaffold00009:-:14929-14955	exon extension	scaffold00009:14788-16309	Yes	exon extension	ASTE004562	KB665143:-:18796-18822	37	1.65	1237.54	0.09	619.272	2		1	Brain
		IGDFGMTR	scaffold00009:-:14956-14979						KB665143:-:18823-18846	47	2.23	896.43	0.78	448.719	2		2	Midgut; Brain
		NcMVAEDLTVK	scaffold00009:-:14980-15012						KB665143:-:18847-18879	54	3.08	1279.6	0.72	640.305	2	C2(Carbamidomethyl)	2	Fatbody; Midgut
		NcmVAEDLTVK	scaffold00009:-:14980-15012						KB665143:-:18847-18879	52	2.35	1295.6	0.77	648.303	2	C2(Carbamidomethyl); M3(Oxidation)	1	Midgut
		VDEWEVPR	scaffold00009:-:15445-15468						KB665143:-:19312-19335	65	2.24	1029.5	0.12	515.254	2		3	Brain; Ovary; Salivary gland
		LFAQVNPDYAGVTYK	scaffold00009:-:15469-15513						KB665143:-:19336-19380	88	4.47	1685.85	-0.48	843.43	2		6	Brain; Fatbody; Salivary gland
		IASNYesmKDPNEEYYR	scaffold00009:-:16150-16200						KB665143:-:20017-20067	59	4.95	2124.93	6.26	708.982	3	M8(Oxidation)	2	Brain; Proboscis
		IASNYesMKDPNEEYYR	scaffold00009:-:16150-16200						KB665143:-:20017-20067	-	1.34	2108.92	-0.06	703.646	3		1	Brain
51	ASTEI02435	EPTDNLVSFEQLTNVGEFLR	scaffold00009:+:2255064-2255123	exon extension	scaffold00009:2254824-2255654	No	annotated	ASTE001541	-	94	-	2308.16	7.46	1154.59	2		1	Proboscis
52	ASTEI02610	ITTTDTGIHFKK	scaffold00010:-:1284654-1284686	exon extension	scaffold00010:1284516-1284701	Yes	exon extension	ASTE008296	KB664477:+:478958-478993	87	4.51	1361.74	-0.83	681.374	2		2	Brain
		KITTTDTGIHFK	scaffold00010:-:1284654-1284689						KB664477:+:478955-478990	78	5.8	1361.74	1.91	454.587	3		6	Testis
53	ASTEI095322	TMVVMGSGGHTAEMLR	scaffold00096:151648-151695	exon extension	scaffold00096: 151151-151696	Yes	annotated	ASTE007741	KB664742:+:18007-18054	109	2.34	1676.79	-1.6	838.898	2		1	Salivary gland
54	ASTEI09515	TIPVQTGLSR	scaffold00096:5805-5834	exon extension	scaffold00096: 5329-5927	Yes	annotated	ASTE007063	KB664481:-:155089-155118	26	-	1071.62	-0.53	536.311	2		1	Salivary gland
		LLAVIGPVGAGK	scaffold00096:6423-6458		scaffold00096:6132- 6992	Yes			KB664481:-:154465-154500	71	3.73	1094.69	-0.22	547.85	2		2	Ovary; Proboscis
		NNILFGLPYDR	scaffold00096:6576-6608						KB664481:-:154315-154347	68	2.87	1321.69	2.15	661.35	2		6	Antennae; Haemolymph; Malpighian tubules; Maxillary palps; Proboscis
		AVYNNASIYLLDDPLSAVDAHVGK	scaffold00096:6747-6818						KB664481:-:154105-154176	92	5.24	2545.34	19.8	849.119	3		1	Testis
		HLFDEVIGPR	scaffold00096:6819-6848						KB664481:-:154075-154104	38	2.86	1182.63	2.37	591.818	2		1	Testis
		QTTESIQQMTAVER	scaffold00096:8345-8386		scaffold00096: 7970-8967	Yes			KB664481:-:152535-152576	112	4.86	1621.79	1.96	811.398	2		4	Testis; Midgut
		VVQYTEITPETDPPK	scaffold00096:8387-8431						KB664481:-:152490-152534	73	3.84	1716.87	-1.88	858.937	2		2	Testis; Fatbody
		ISIIPQDPVLFSATIR	scaffold00096:8693-8740						KB664481:-:152181-152228	71	2.74	1770.02	0.67	885.512	2		2	Pupae
		YNLDPFNLYDDDMLWR	scaffold00096:8741-8788
		cADYAEcVEGQcQcR	scaffold00098:291484-291528		scaffold00096:291382-291529	Yes			KB664777:-:363268-363312	106	4.01	1905.71	4.91	953.357	2	C1(Carbamidomethyl); C7(Carbamidomethyl); C12(Carbamidomethyl); C14(Carbamidomethyl)	2	Testis
55	ASTEI09723	QANGTGPAPAASK	scaffold00101:467222-467260	exon extension	scaffold00101:-467222-467685	Yes	annotated	ASTE004447	KB665365:+:445419-445457	77	4.08	1169.59	2.92	585.301	2		2	Testis
56	ASTEI09752	STLHASGLLSHR	scaffold00102:-:297437-297472	exon extension	scaffold00102: 297428- 300645	No	exon extension	ASTE009898	-	54	5.39	1278.69	-0.84	426.902	3		1	Haemolymph
		ISPGSNAFLEIDHVR	scaffold00102:-:297536-297580						-	79	5.19	1654.86	1.9	827.933	2		2	Haemolymph
57	ASTEI09852	SSFYPAQPTSVLNSNYHSIAPTSK	scaffold00105:228892-228963	exon extension	scaffold00105:228886-229953	No	exon extension	ASTE009661	-	-	4.31	2596.28	5.82	866.099	3		1	Brain
		SLTNLPSSTTSAYPYER	scaffold00105:229720-229770						-	66	4.97	1886.92	4.42	943.964	2		1	Brain
58	ASTEI10069	NPNDTGPKPR	scaffold00111:-:253600-253629	3' exon extension	scaffold00111:252747-260982	Yes	annotated	ASTE000537	KB664510:-:110093-110122	64	3.8	1095.55	-0.22	365.856	3		4	Testis; Ovary
		SFGGFDNQNADNK	scaffold00111:-:253801-253839		scaffold00111:253801-267409				KB664510:-:110294-110332	101	3.39	1413.6	-0.65	707.305	2		17	Brain; Testis; Fatbody; Midgut; Ovary; Salivary gland
		KSFGGFDNQNADNK	scaffold00111:-:253801-253842		scaffold00111:253801-267409				KB664510:-:110294-110335	94	6.28	1541.7	-0.12	771.353	2		4	Brain; Ovary
59	ASTEI10024	TVVTSTPVTNQK	scaffold00109:-:393553-393588	joining of exon	scaffold_00109:389683-393588	Yes	annotated	ASTE006575	KB664419:+:243202-243237	88	3.35	1274.7	0.11	637.851	2		6	Brain; Male accessory glands; Testis; Ovary
60	ASTEI10186	DDFAETPPLPPDSVSWVISDFKR	scaffold00118:+:51337-51405	5'exon extension	scaffold00118:51337-54855	Yes	protein extension	ASTE011129	KB664502:+:729-797	32	4.75	2618.27	-3.92	873.427	3		2	Brain
61	ASTEI10271	VEAVGTYDK	scaffold00121:-:273943-273969	3'- exon extension	scaffold00121:273888-274390	Yes	annotated	ASTE00108	KB664799:+:777255-777281	71	2.27	981.486	-2.34	491.247	2		1	Testis
		AEVYLLDDPLSAVDSHVGR	scaffold00121:-:274087-274143						KB664799:+:777081-777137	77	1.74	2056.04	1.45	686.017	3		2	Salivary gland
		rAEVYLLDDPLSAVDSHVGR	scaffold00121:-:274087-274146						KB664799:+:777078-777137	44	5.75	2356.24	0.83	786.085	3	N-Term(iTRAQ4plex)	1	Midgut
		VNGDISYASQEPWLFSGTVR	scaffold00121:-:274330-274389						KB664799:+:776835-776894	85	4.11	2226.08	-0.04	1113.54	2		1	Proboscis
		SSLIHAILGELPLESGSIK	scaffold00121:-:274390-274446						KB664799:+:776778-776834	79	5.31	1964.1	-2.23	982.555	2		12	Testis; Legs; Malpighian tubules; Maxillary palps; Ovary; Proboscis; Salivary gland
		AFAITAYYNILR	scaffold00121:-:274858-274893						KB664799:+:776331-776366	-	1.77	1415.77	-0.49	708.387	2		1	Larvae
		LMNEIIQGIQVIK	scaffold00121:-:275143-275181						KB664799:+:776045-776083	76	4.62	1498.87	0.91	749.937	2		5	Testis; Larvae; Maxillary palps; Proboscis; Salivary gland
62	ASTEI10786	LLGDTALAAAVHTTVK	scaffold00164:+:17306-17353	5'-exon extension	scaffold164:175632-177090	Yes	exon extension	ASTE000567	KB664510:-:524647-524694	64	4.8	1580.88	-11.45	527.632	3		1	Testis
		LNRVPGPLNTHSK	scaffold00164:+:17354-17392						KB664510:-:524608-524646	37	3.9	1432.8	1.82	358.957	4		1	Testis
		VPGPLNTHSK	scaffold00164:+:17363-17392						KB664510:-:524608-524637	67	3.83	1049.56	-10.88	350.526	3		6	Testis
63	ASTEI10800	EHcLEccQK	scaffold00165:-:100786-100812	5'-exon extension	scaffold165:100786-101509	Yes	annotated	ASTE008546	KB664445:+:334982-335008	26	-	1263.49	0.27	632.25	2	C3(Carbamidomethyl); C6(Carbamidomethyl); C7(Carbamidomethyl)	2	Testis
64	ASTEI10516	LYDVDNDGFITR	scaffold00137:+:78854-78889	3' exon extension	scaffold137:175632-177090	Yes	novel gene		-	99	2.95	1427.68	0.54	714.344	2		7	Brain; Antennae; Maxillary palps; Salivary gland
65	ASTEI11059	FSLSHQSIQYVGNEPSTGPAR	scaffold00295:-:9786-9848	5'	scaffold00295:-:9762-9848	No	novel exon	ASTE000687	-	69	5.16	2275.11	1.48	759.043	3		3	Testis
66	ASTEI11272	TVDLFVGNFITFR	scaffold01015:+:839-877	5'	scaffold01015:+2-877	No	annotated	ASTE009899	KB665177:-:373793-373831	98	3.64	1528.82	4.03	764.915	2		12	Salivary gland
67	ASTEI00848	NPFPPLPISEcMcYNATK	scaffold00003:-:2991954-2992007	exon extension	scaffold00003:2991886-2993034	Yes	protein extension	ASTE009191	KB665376:+:621735-621788	78	5.27	2138.97	0.29	1069.99	2	C11(Carbamidomethyl); C13(Carbamidomethyl)	11	Testis; Male accessory glands
		NPFPPLPISEcmcYNATK	scaffold00003:-:2991954-2992007						KB665376:+:621735-621788	86	5.06	2154.97	2.67	718.995	3	C11(Carbamidomethyl); M12(Oxidation); C13(Carbamidomethyl)	26	Testis; Male accessory glands
		RPPVPSFSEAYKNPFPPLPISEcmcYNATK	scaffold00003:-:2991954-2992043						KB665376:+:621699-621788	58	7.77	3513.68	3.64	879.175	4	C23(Carbamidomethyl); M24(Oxidation); C25(Carbamidomethyl)	3	Testis
		RPPVPSFSEAYK	scaffold00003:-:2992008-2992043						KB665376:+:621699-621734	65	4.61	1377.72	-0.05	689.362	2		15	Testis; Male accessory glands
		cEAALPIRDcVR	scaffold00003:-:2992047-2992082						KB665376:+:621660-621695	35	-	1459.72	5.86	730.365	2	C1(Carbamidomethyl); C10(Carbamidomethyl)	1	Testis
		cEAALPIR	scaffold00003:-:2992059-2992082						KB665376:+:621660-621683	-	3.2	929.486	-1.59	465.247	2	C1(Carbamidomethyl)	11	Testis
		SScTTPAPSIEAPEcIK	scaffold00003:-:2992149-2992199						KB665376:+:621543-621593	81	5.9	1847.85	-3.09	924.427	2	C3(Carbamidomethyl); C15(Carbamidomethyl)	20	Testis; Male accessory glands; Midgut
		KSScTTPAPSIEAPEcIK	scaffold00003:-:2992149-2992202						KB665376:+:621540-621593	114	6.07	1975.98	18.73	988.495	2	C4(Carbamidomethyl); C16(Carbamidomethyl)	9	Testis; Male accessory glands
		ARDLGAFEGTVPER	scaffold00003:-:2992326-2992367						KB665376:+:621375-621416	90	5.3	1517.78	3.4	759.392	2		9	Testis
68	ASTEI01766	EcTSEScGAGVFmAAHEDRHYcGK	scaffold00006:-:2100636-2100707						KB664288:+:638609-638680	-	6.02	2775.1	0.67	694.531	4	C2(Carbamidomethyl); C7(Carbamidomethyl); M13(Oxidation); C22(Carbamidomethyl)	1	Midgut
		REcTSEScGAGVFmAAHEDRHYcGK	scaffold00006:-:2100636-2100710						KB664288:+:638606-638680	15	3.63	2931.2	-0.21	733.556	4	C3(Carbamidomethyl); C8(Carbamidomethyl); M14(Oxidation); C23(Carbamidomethyl)	1	Midgut
		ecTSEScGAGVFMAAHEDR	scaffold00006:-:2100651-2100707						KB664288:+:638609-638665	57	7.37	2235.86	-4.9	745.958	3	N-Term(iTRAQ4plex); C2(Methylthio); C7(Methylthio)	3	Ovary; Malpighian tubules; Midgut; Fatbody
		EcTSEScGAGVFMAAHEDR	scaffold00006:-:2100651-2100707						KB664288:+:638609-638665	152	7.34	2113.83	-3.86	1057.42	2	C2(Carbamidomethyl); C7(Carbamidomethyl)	36	Brain; Salivary gland; Testis; Antennae; Fatbody; Male accessory glands; Midgut; Ovary
		EcTSEScGAGVFmAAHEDR	scaffold00006:-:2100651-2100707						KB664288:+:638609-638665	117	6.02	2129.83	-0.41	1065.42	2	C2(Carbamidomethyl); C7(Carbamidomethyl); M13(Oxidation)	20	Salivary gland; Testis; Legs; Male accessory glands; Midgut; Ovary
		REcTSEScGAGVFMAAHEDR	scaffold00006:-:2100651-2100710						KB664288:+:638606-638665	73	8.23	2269.95	4.55	757.321	3	C3(Carbamidomethyl); C8(Carbamidomethyl)	6	Male accessory glands; Midgut; Ovary
		REcTSEScGAGVFmAAHEDR	scaffold00006:-:2100651-2100710						KB664288:+:638606-638665	75	7.4	2285.93	0.31	762.65	3	C3(Carbamidomethyl); C8(Carbamidomethyl); M14(Oxidation)	2	Midgut
69	ASTEI01316	AQTFFPcVGQSGDELSGR	scaffold00005:+:1156333-1156386	exon extension	Exon 3:scaffold00005:1155927-1157034	Yes	annotated	ASTE005852	KB664289:+:962410-962463	95	4.35	1955.91	7.78	978.457	2	C7(Carbamidomethyl)	2	Antennae
		LEQIAASELR	scaffold00005:+:1156387-1156416						KB664289:+:962464-962493	67	2.99	1129.62	1.23	565.315	2		1	Antennae
		EAAVHEDVGEVVADGAVGSFR	scaffold00005:+:1157289-1157351		Exon 4: scaffold00005:1157109-1157975				KB664289:+:963378-963440	35	4.08	2114.03	5.3	705.347	3		1	Antennae
70	ASTEI01456	cAcGGGNYAPSEDGSQK	scaffold00005:+:2492671-2492721	exon extension	scaffold00005:scaffold00005:2491940-2492917	Yes	protein extension	ASTE014264	KB664977:-:429470-429520	120	4.68	1757.69	0.01	879.346	2	C1(Carbamidomethyl); C3(Carbamidomethyl)	1	Midgut
		EcALKVESTGDV	scaffold00005:+:2494909-2494944		scaffold00005:scaffold00005:2494409-2494944				KB664977:-:427247-427282	30	3.36	1307.61	-0.68	654.311	2	C2(Carbamidomethyl)	3	Midgut
71	ASTEI00886	TDADWENYAER	scaffold00003:+:3482819-3482851	3' gene extension	scaffold00003:3482788-3484470	Yes	joining of genes	ASTE009145 and ASTE009146	KB665376:-:81755-81787	88	4.42	1369.57	0.12	685.287	2		48	Testis; Fatbody; Malpighian tubules; Midgut; Ovary; Proboscis; Pupae
		DYDSWAELGNANWGWR	scaffold00003:+:3482963-3483010						KB665376:-:81596-81643	111	5.48	1939.83	-0.95	970.421	2		28	Thorax; Testis; Legs; Malpighian tubules; Midgut; Ovary; Proboscis; Pupae; Salivary gland
		dYDSWAELGNANWGWR	scaffold00003:+:3482963-3483010						KB665376:-:81596-81643	88	6.66	2083.94	-0.19	1042.47	2	N-Term(iTRAQ4plex)	3	Ovary; Malpighian tubules; Midgut; Fatbody
		KSEDNNDPELLR	scaffold00003:+:3483032-3483067						KB665376:-:81539-81574	100	4.68	1429.69	0.85	715.35	2		8	Testis; Midgut; Salivary gland; Fatbody
		kSEDNNDPELLR	scaffold00003:+:3483032-3483067						KB665376:-:81539-81574	48	4.77	1717.9	0.36	573.304	3	N-Term(iTRAQ4plex); K1(iTRAQ4plex)	2	Midgut
		qDGGkFHASGGYLk	scaffold00003:+:3483068-3483109						KB665376:-:81497-81538	77	4.14	1897.03	0.05	949.018	2	N-Term(iTRAQ4plex); K5(iTRAQ4plex); K14(iTRAQ4plex)	3	Midgut
		VGNFPVNHPLAEVMLQAFKDAGFESNSDINGAR	scaffold00003:+:3483110-3483208						KB665376:-:81398-81496	73	12.49	3544.74	2.73	1182.25	3		3	Midgut; Salivary gland
		DAGFESNSDINGAR	scaffold00003:+:3483167-3483208	5' gene extension					KB665376:-:81398-81439	91	4.29	1452.64	0.17	726.821	2		51	Malpighian tubules; Salivary gland; Testis; Fatbody; Maxillary palps; Midgut; Ovary; Proboscis; Pupae
		dAGFESNSDINGAR	scaffold00003:+:3483167-3483208						KB665376:-:81398-81439	118	5.34	1596.74	0.38	798.872	2	N-Term(iTRAQ4plex)	4	Ovary; Malpighian tubules; Midgut; Fatbody
		GRVTLATENFNEFNPPR	scaffold00003:+:3483908-3483958						KB665376:-:80648-80698	101	5.8	1961.98	-0.59	981.495	2		5	Midgut
		gRVTLATENFNEFNPPR	scaffold00003:+:3483908-3483958						KB665376:-:80648-80698	46	6.36	2106.09	0.34	702.7	3	N-Term(iTRAQ4plex)	1	Midgut
		VTLATENFNEFNPPR	scaffold00003:+:3483914-3483958						KB665376:-:80648-80692	137	5.05	1748.86	-2.32	874.932	2		173	Thorax; Malpighian tubules; Testis; Antennae; Fatbody; Head; Legs; Male accessory glands; Maxillary palps; Midgut; Ovary; Proboscis; Pupae; Salivary gland
		vTLATENFNEFNPPR	scaffold00003:+:3483914-3483958						KB665376:-:80648-80692	95	5.16	1892.97	3.4	946.988	2	N-Term(iTRAQ4plex)	8	Ovary; Malpighian tubules; Midgut; Fatbody
		VTLATENFNEFNPPRIESGYLEAR	scaffold00003:+:3483914-3483985						KB665376:-:80621-80692	45	3.94	2767.37	1.15	1384.19	2		6	Midgut
		HMTLTLYHPVGTAK	scaffold00003:+:3484145-3484186						KB665376:-:80420-80461	75	6.52	1568.83	0.9	784.917	2		36	Testis; Legs; Male accessory glands; Malpighian tubules; Midgut; Pupae; Salivary gland; Fatbody
		hmTLTLYHPVGTAk	scaffold00003:+:3484145-3484186						KB665376:-:80420-80461	90	6.3	1873.03	2.29	937.018	2	N-Term(iTRAQ4plex); M2(Oxidation); K14(iTRAQ4plex)	6	Midgut
		hMTLTLYHPVGTAk	scaffold00003:+:3484145-3484186						KB665376:-:80420-80461	36	6.31	1857.04	3.11	619.683	3	N-Term(iTRAQ4plex); K14(iTRAQ4plex)	4	Midgut
		HmTLTLYHPVGTAK	scaffold00003:+:3484145-3484186						KB665376:-:80420-80461	75	6.51	1584.83	3.21	528.947	3	M2(Oxidation)	14	Testis; Malpighian tubules; Midgut
		MGPDSDKGAVVDGR	scaffold00003:+:3484187-3484228						KB665376:-:80378-80419	111	4.41	1403.66	1.16	702.334	2		9	Testis; Fatbody; Midgut
		mGPDSDKGAVVDGR	scaffold00003:+:3484187-3484228						KB665376:-:80378-80419	119	4.83	1419.65	-1.03	710.33	2	M1(Oxidation)	14	Fatbody; Midgut
		mGPDSDkGAVVDGR	scaffold00003:+:3484187-3484228						KB665376:-:80378-80419	49	2.41	1707.86	1.63	854.434	2	N-Term(iTRAQ4plex); M1(Oxidation); K7(iTRAQ4plex)	1	Midgut
		ASDMIKEDWGVGPK	scaffold00003:+:3484334-3484375				exon extension	ASTE009145	KB665376:-:80231-80272	87	4.66	1532.74	0.03	766.874	2		25	Testis; Fatbody; Malpighian tubules; Midgut
		ASDmIKEDWGVGPK	scaffold00003:+:3484334-3484375						KB665376:-:80231-80272	100	4.06	1548.74	-0.31	774.872	2	M4(Oxidation)	18	Fatbody; Malpighian tubules; Midgut
		EDWGVGPK	scaffold00003:+:3484352-3484375						KB665376:-:80231-80254	42	1.88	887.425	-0.6	444.216	2		2	Midgut; Salivary gland
72	ASTEI02745	QVAEPVYAAGVK	scaffold00011:+:583362-583397	exon extension	scaffold00011:583,089-583,397	Yes-partial	annotated	ASTE001008	KB664721:+:767523-767558	62	4.3	1231.67	1.56	616.339	2		1	Fatbody
73	ASTEI02746	TAYVSSYPSVYAEPAVYANQWH	scaffold00011:-:580251-580316	exon extension	scaffold00011:580,079-580,815	Yes	annotated	ASTE001007	-	48	4.85	2503.15	-3.11	1252.08	2		4	Legs; Maxillary palps; Proboscis
74	ASTEI02718	YSISNLLDcMEEDEERHDGIGLVSLAQR	scaffold00011:+:94794-94877	exon extension	scaffold00011:93,463-95,457	Yes	annotated	ASTE000981	KB664721:+:271266-271349	58	5.06	3249.53	3.61	1083.85	3	C9(Carbamidomethyl)	1	Midgut
75	ASTEI02990	HNcGGSVLSSK	scaffold00012:-:1261578-1261610	joining of exons	scaffold00012:1,261,578-1,261,831	Yes	annotated	ASTE008621	KB664621:+:767733-767765	55	4.76	1145.54	2.53	573.274	2	C3(Carbamidomethyl)	2	Testis; Midgut
		AVNVPTINQEEcDKAYR	scaffold00012:-:1266498-1266548	exon extension	scaffold00012:1,266,369-1,267,046				KB664621:+:762795-762845	98	4.88	2006.96	-0.59	1003.98	2	C12(Carbamidomethyl)	18	Midgut
		AVNVPTINQEEcDK	scaffold00012:-:1266507-1266548						KB664621:+:762795-762836	104	4.21	1616.76	-0.42	808.883	2	C12(Carbamidomethyl)	21	Fatbody; Midgut
76	ASTEI02963	SLSEQSEENATGK	scaffold00012:-:764017-764055	exon extension	scaffold00012:763,954--764997	Yes	annotated	ASTE008651	KB664621:+:1320346-1320384	74	3.45	1379.63	-1.57	690.317	2		4	Testis; Midgut; Ovary; Salivary gland
		VNLMTPDSFSTPVSTSGSR	scaffold00012:-:766048-766104	joining of exon	scaffold00012: 766,042-767,763				KB664621:+:1318296-1318352	91	3.9	1982.95	0.08	991.978	2		1	Ovary
77	ASTEI01466	KGDDTDDIIEK	scaffold00005:2700108-2700140	exon extension	scaffold00005:2700048-2703482	No	annotated	ASTE002332	-	47	3.93	1248.59	-0.66	624.801	2		1	Male accessory glands
		KPLDDVQQAPTEAIDK	scaffold00005:2700330-2700377						-	111	6.91	1767.91	-0.49	884.459	2		6	Male accessory glands
78	ASTEI01468	STSSSSSSWSSSNVSDK	scaffold00005:2728150-2728200	exon extension	scaffold00005: 2728030-2728631	Yes	annotated	ASTE002330	KB664977:-:194899-194949	141	4.63	1719.73	-2.87	860.366	2		4	Brain; Testis; Midgut
		STSSSSSSWSSSNVSDKHTQGAR	scaffold00005:2728150-2728218						KB664977:-:194881-194949	78	7.4	2370.06	0.37	790.69	3		3	Testis; Midgut
		DEEGYNTYKPHDPTDTHEYR	scaffold00005:2728219-2728278						KB664977:-:194821-194880	-	1.68	2467.04	0.1	617.516	4		1	Midgut
		DEEGYNTYKPHDPTDTHEYRK	scaffold00005:2728219-2728281						KB664977:-:194818-194880	34	4.65	2595.14	2.36	865.72	3		6	Thorax; Midgut; Ovary; Male accessory glands
79	ASTEI01725	ASETTNcPFVQYILAK	scaffold00006:1449000-1449047						-	103	5.48	1841.91	1.29	921.46	2	C7(Carbamidomethyl)	18	Testis; Male accessory glands
80	ASTEI01728	AESDTLASLIASYGEK	scaffold00006:1500340-1500387	exon extension	scaffold00006: 1500304-1501350	Yes	annotated	ASTE006356	-	70	3.81	1654.81	-2.67	827.91	2		3	Fatbody; Ovary
		ASLAcLVPAGNAWTR	scaffold00006:1500388-1500432						KB664288:+:1244167-1244211	-	3.02	1586.81	-1.63	793.908	2	C5(Carbamidomethyl)	1	Ovary
81	ASTEI03792	SGDDLTYAEIVAGLR	scaffold00017:+:1186581-1186625	exon extension	scaffold00017:1,186,404-1,188,879	Yes	annotated	ASTE010741	-	85	4.06	1579.8	1.55	790.403	2		3	Male accessory glands; Ovary; Salivary gland
		NVSVVDLRPLEEPLTVTSIELK	scaffold00017:+:1188168-1188233						KB664555:-:146446-146511	29	4.14	2451.37	-0.01	817.795	3		2	Male accessory glands
		EVEESTVQQTETVSYHR	scaffold00017:+:1188420-1188470						-	60	5.92	2021.94	0.59	674.652	3		3	Proboscis; Maxillary palps
		LTPNQPEDAQSESIVESVVK	scaffold00017:+:1195700-1195759		scaffold00017:1,195,347-1,196,761				KB664555:-:136990-137049	115	4.3	2170.08	-2.04	1085.55	2		5	Fatbody; Male accessory glands; Ovary; Salivary gland
		EDVQPQVDDTSR	scaffold00017:+:1195835-1195870						KB664555:-:136879-136914	67	2.84	1388.63	-0.66	694.818	2		2	Male accessory glands; Ovary
		VAEDTDVSER	scaffold00017:+:1197089-1197118		scaffold00017:1,196,828-1,197,622				-	73	2.86	1120.51	-0.4	560.759	2		2	Male accessory glands; Salivary gland
		QATDQQEVGASENASR	scaffold00017:+:1212477-1212524		scaffold00017:1,212,299-1,212,526	Yes	exon extension	ASTE010741	KB664555:-:120242-120289	117	4.64	1690.76	0.85	845.886	2		1	Testis
82	ASTEI03794	LVTNVNNNNPDDVTVR	scaffold00017:+:1226054-1226101	exon extension	scaffold00017:1,225,155-1,226,104-	No	annotated	ASTE010739	-	116	5.47	1783.89	0.87	892.451	2		5	Testis
83	ASTEI03806	EIITLLPLK	scaffold00017:+:1607234-1607260	exon extension	scaffold00017:1,606,827-1,607,259	Yes	annotated	ASTE011352	KB664644:+:273557-273583	53	1.53	1039.68	-0.02	520.342	2		3	Brain; Fatbody; Salivary gland
84	ASTEI03712	TKPIILVAQNDPSSGIIGLVNcIR	scaffold00017:+:20201-20272	exon extension	scaffold00017:20,197-20,705	Yes	annotated	ASTE010827	-	100	7.42	2578.45	3.55	1289.73	2	C22(Carbamidomethyl)	33	Testis; Fatbody; Larvae; Malpighian tubules; Ovary; Pupae
85	ASTEI03844	QFIDSYFSSFTNDPVR	scaffold00017:+:2399552-2399599		scaffold00017:2,399,549-2,400,593				KB664644:+:1077394-1077441	115	4.8	1922.9	2.81	961.952	2		10	Brain; Fatbody; Male accessory glands; Malpighian tubules; Midgut; Ovary; Salivary gland; Testis; Pupae
		qFIDSYFSSFTNDPVR	scaffold00017:+:2399552-2399599						KB664644:+:1077394-1077441	95	5.92	2066.99	-0.76	1034	2	N-Term(iTRAQ4plex)	1	Ovary; Malpighian tubules; Midgut; Fatbody
86	ASTEI01664	SRSPATTTVPEPEHEAFVR	scaffold00006:+:567798-567854	exon extension	scaffold00006:567727-567939	Yes	protein extension	ASTE006420	KB664288:-:2183131-2183187	40	5.75	2111.06	5.71	704.359	3		6	Antennae; Male accessory glands; Proboscis; Maxillary palps
87	ASTEI03881	YFHPPQHLK	scaffold00018:-:653457-653483	exon extension	scaffold00018:653,342-653,519	Yes	protein extension	ASTE011334	KB664788:-:714311-714337	26	2.4	1166.61	1.54	583.81	2		1	Brain
88	ASTEI02191	TYEGmEGISAAAVGAPIR	scaffold00008:+:1970572-1970625	joining of exons	scaffold00008:1967657-1968533	No	annotated	ASTE009501	-	120	3.69	1808.88	-1.22	904.945	2	M5(Oxidation)	1	Larvae
		TYEGMEGISAAAVGAPIR	scaffold00008:+:1970572-1970625						-	108	4.3	1792.89	1.04	896.95	2		2	Larvae
89	ASTEI03953	NPcVPSPcGPNSQcR	scaffold00019:-:476064-476108	exon extension	scaffold00019:475138-476,112	Yes	exon extension	ASTE003156	-	63	3.51	1729.72	2.32	865.366	2	C3(Carbamidomethyl); C8(Carbamidomethyl); C14(Carbamidomethyl)	7	Salivary gland; Fatbody; Larvae
90	ASTEI04507	VQPVPDNRPTVVGGR	scaffold00023:+:1633119-1633163	exon extension	scaffold00023:1633065-1633554	Yes	exon extension	ASTE004345	KB665121:-:722187-722231	42	2.85	1590.87	-1.92	795.938	2		3	Antennae; Fatbody; Testis
		vQPVPDNRPTVVGGR	scaffold00023:+:1633119-1633163						KB665121:-:722187-722231	25	2.93	1734.97	-0.13	578.996	3	N-Term(iTRAQ4plex)	1	Midgut
		EVEEEDRER	scaffold00023:+:1633422-1633448						KB665121:-:721902-721928	40	-	1190.53	0.14	595.768	2		1	Ovary
91	ASTEI04064	YADASKFEVPNQSDER	scaffold00020:+:735441-735488	exon extension	scaffold00020:735358- 735488	No	annotated	ASTE000495	KB665099:-:146987-147034	100	6.23	1855.86	5.58	928.432	2		24	Antennae; Legs; Maxillary palps; Midgut; Proboscis; Testis
92	ASTEI03463	VGLQVNLFKPR	scaffold00014:2745366-2745398	exon extension	scaffold00014: 2745166-2745749	Yes	annotated	ASTE003293	KB664761:-:21819-21851	61	1.81	1270.76	-0.85	424.259	3		2	Brain
93	ASTEI03569	VGNENSTANSAVANEAAVK	scaffold00015:1907075-1907131	exon extension	scaffold00015: 1904975-1907487	Yes	annotated	ASTE000268	KB664732:+:708781-708837	155	6.39	1845.89	-0.7	923.45	2		20	Brain; Testis; Antennae; Fatbody; Maxillary palps; Midgut; Ovary; Proboscis; Salivary gland
		ENEGNLIQNDNNADNDIKNDQQALGK	scaffold00015:1907210-1907287						KB664732:+:708625-708702	76	4.54	2884.33	0.16	962.115	3		2	Ovary
		ENEGNLIQNDNNADNDIK	scaffold00015:1907234-1907287						KB664732:+:708625-708678	-	2.49	2029.9	-2.11	1015.45	2		1	Ovary
		ENDSVGKENEGNLIQNDNNADNDIK	scaffold00015:1907234-1907308						KB664732:+:708604-708678	68	7.1	2759.23	-3.14	920.414	3		1	Ovary
		YDDVIIDLDAEEEPTKEEPTPK	scaffold00015:1907309-1907374						KB664732:+:708538-708603	51	5.3	2546.21	4.23	849.41	3		2	Testis
		LPAQNTVAGYEGVR	scaffold00015:1907393-1907434						KB664732:+:708478-708519	90	4.36	1474.77	6.71	737.891	2		4	Testis; Male accessory glands; Ovary
		RLPAQNTVAGYEGVR	scaffold00015:1907393-1907437						KB664732:+:708475-708519	90	5.43	1630.88	8.14	815.943	2		1	Ovary
94	ASTEI03537	LGYYEGDAYKQEL	scaffold00015:-:1374685-1374723	exon extension	scaffold00015: 1374008-1375689	Yes	exon extension	ASTE000302	KB664732:+:1266583-1266621	51	4.12	1548.72	-2.43	774.863	2		6	Testis; Midgut; Fatbody; Ovary
		lGYYEGDAYk	scaffold00015:-:1374694-1374723						KB664732:+:1266583-1266612	-	4.4	1466.74	-2.28	733.872	2	N-Term(iTRAQ4plex); K10(iTRAQ4plex)	1	Ovary; Malpighian tubules; Midgut; Fatbody
		LGYYEGDAYK	scaffold00015:-:1374694-1374723						KB664732:+:1266583-1266612	70	2.91	1178.54	2.77	589.774	2		7	Testis; Malpighian tubules; Midgut; Pupae
95	ASTEI02425	VPPHSTQIDGQSPSHLVPGK	scaffold00009:2057145-2057204	exon extension	scaffold00009:2056058-2057205	Yes	annotated	ASTE001553	KB665077:+:302460-302519	-	7.08	2081.08	-0.98	694.363	3		3	Brain
		NHFLQLLYR	scaffold00009:-:2059636-2059662		scaffold00009:2059459-2059680	No			KB665077:+:300000-300026	45	1.85	1203.66	-0.47	602.335	2		1	Brain
96	ASTEI03945	NANmINAcESTVDQSVQVENASK	scaffold00019:+:367940-368008	exon extension	scaffold00019:367,702-368,205	Yes	annotated	ASTE003164	KB664489:-:124291-124359	24	-	2525.13	1.45	842.381	3	M4(Oxidation); C8(Carbamidomethyl)	1	Testis
		NANMINAcESTVDQSVQVENASK	scaffold00019:+:367940-368008						KB664489:-:124291-124359	57	2.65	2509.14	2.52	837.05	3	C8(Carbamidomethyl)	3	Testis
		TYAIADK	scaffold00019:+:368024-368044			No			-	49	-	781.408	-1.83	391.207	2		1	Testis
		TQTDcTHSLHVR	scaffold00019:+:368045-368080						-	97	4.46	1454.68	-0.8	485.565	3	C5(Carbamidomethyl)	11	Testis; Male accessory glands
97	ASTEI03947	LGQTNGPNVFINNHLR	scaffold00019:+:410735-410782	exon extension	scaffold00019:410,656-410,812	Yes	annotated	ASTE003162	KB664489:-:81528-81575	63	2.82	1793.95	2.78	598.653	3		1	Testis
98	ASTEI04130	VSSSSSSSALTPTSAASSSHGK	scaffold00020:-:1982657-1982722	exon extension	scaffold00020:1,982,565-1,983,333	Yes	annotated	ASTE005216	KB664522:+:209302-209367	57	4.48	2022.96	0.24	674.991	3		1	Ovary
99	ASTEI02710	NSCSVVVESPSVANGNQWIAR	scaffold00010:+:3456492-345655	exon extension	scaffold00010:+:3456492-3457064	No	protein extension	ASTE007842
100	ASTEI03672	TLcGTPNYIAPEILNK	scaffold00016:-:1448302-1448349	exon extension	scaffold00016: 1447941-1448568	Yes	exon extension	ASTE006047	KB664323:-:232478-232525	99	3.65	1803.93	-2.13	902.467	2	C3(Carbamidomethyl)	4	Testis; Midgut; Ovary
		IGDFGLATK	scaffold00016:-:1448377-1448403						KB664323:-:232553-232579	59	3.12	921.503	-1.51	461.255	2		2	Testis; Ovary
		lGNLFLNDELHVk	scaffold00016:-:1448404-1448442						KB664323:-:232580-232618	57	6.41	1800.02	-4.3	600.678	3	N-Term(iTRAQ4plex); K13(iTRAQ4plex)	1	Ovary; Malpighian tubules; Midgut; Fatbody
101	ASTEI04136	SNNNQDSIGR	scaffold00020:-:2045784-2045813	exon extension	scaffold00020:2045753-2046628	No	annotated	ASTE005210	KB664522:+:146488-146517	74	3.07	1104.5	1.3	552.756	2		2	Testis
102	ASTEI03840	TEQFNNGMTK	scaffold00017:2337779-2337808	exon extension	scaffold00017:2337779-2337549	No	annotated	ASTE011390	-	56	1.85	1169.53	-0.24	585.266	2		2	Salivary gland
103	ASTEI03758	TQVYGSDHcPVTLFLNI	scaffold00017:671239-671289	exon extension	scaffold00017: 670946-672179	Yes	exon extension	ASTE010775	KB664555:+:681130-681180	49	-	1963.96	2.56	982.485	2	C9(Carbamidomethyl)	2	Ovary
104	ASTEI04135	LETDLTVEMLASGLWK	scaffold00020:-:2033395-2033442	exon extension	scaffold00020:2,033,392--2,033,717	Yes	annotated	ASTE005211	KB664522:+:158869-158916	35	1.79	1805.96	13.66	903.484	2		1	Salivary gland
		KLETDLTVEMLASGLWK	scaffold00020:-:2033395-2033445						KB664522:+:158866-158916	113	6.17	1934.05	9.92	967.528	2		2	Salivary gland
105	ASTEI05738	ADLLSSGSNSR	scaffold00033:-:730449-730481	exon extension	scaffold00033:729675-730529	Yes	annotated	ASTE008843	KB664553:-:160109-160141	47	2.43	1106.54	-0.72	553.775	2		1	Brain
106	ASTEI05742	cSTQTHQTPGPSPSVHGNATR	scaffold00033:-:760374-760436	exon extension	scaffold00033:760343-760752	Yes	annotated	ASTE008847	KB664553:-:201686-201748	55	6.21	2220.02	-0.46	740.678	3	C1(Carbamidomethyl)	2	Brain
107	ASTEI05856	fIEQQLAGSDFk	scaffold00034:+:1199605-1199640	exon extension	Exon 11:scaffold00034:1199532-1199701	Yes	exon extension	ASTE008459	KB665043:+:76658-76693	79	4.53	1670.9	-2.21	835.951	2	N-Term(iTRAQ4plex); K12(iTRAQ4plex)	1	Ovary; Malpighian tubules; Midgut; Fatbody
		FIEQQLAGSDFK	scaffold00034:+:1199605-1199640						KB665043:+:76658-76693	79	3.86	1382.7	0.44	691.851	2		7	Testis; Fatbody; Male accessory glands; Ovary
		FIEQQLAGSDFKYDS	scaffold00034:+:1199605-1199649						KB665043:+:76658-76702	-	3.45	1747.82	2.38	874.414	2		2	Malpighian tubules
108	ASTEI06644	VGLPGIGGmmPmmPLSASVAVPAVAK	scaffold00042:+:1551013-1551090	exon extension	scaffold00042:+:1551013-1551176	Not for extension	novel exon	ASTE008693	-	75	-	2545.28	-2.88	1273.14	2	M9(Oxidation); M10(Oxidation); M12(Oxidation); M13(Oxidation)	2	Haemolymph
		KEFPETWLWQTIAPK	scaffold00042:+:1551130-1551174						KB664621:-:2212583-2212627	120	6.6	1873.99	1.5	937.497	2		2	Haemolymph
109	ASTEI05881	QYSLNDFELIR	scaffold00034:-:1475150-1475182	exon extension	scaffold00034:1475151-1475335	Yes	exon extension	ASTE008485	KB665043:-:350342-350374	102	3.38	1397.71	2.17	699.358	2		13	Brain; Testis; Malpighian tubules; Midgut; Ovary; Salivary gland
110	ASTEI05700	FDYSPDVER	scaffold00033:+:219920-219946	exon extension	scaffold00033:219828-219974	Yes	annotated	ASTE010635	KB664540:+:69934-69960	57	1.99	1127.5	-0.76	564.253	2		2	Midgut
		fDYSPDVER	scaffold00033:+:219920-219946						KB664540:+:69934-69960	-	2.88	1271.6	-0.3	636.305	2	N-Term(iTRAQ4plex)	1	Midgut
111	ASTEI05688	QVAGmASTLDTWmSSITSmEQLIESR	scaffold00033:+:151663-151740	exon extension	scaffold00033:151279-151761	No	annotated	ASTEI006817	-	21	-	2920.35	2.74	974.12	3	M5(Oxidation); M13(Oxidation); M19(Oxidation)	1	Testis
		QVAGMASTLDTWMSSITSMEQLIESR	scaffold00033:+:151663-151740						-	72	7.14	2872.37	5.89	958.128	3		2	Legs; Midgut
112	ASTEI05799	AQDDYRPPTGK	scaffold00033:-:1744409-1744441	exon extension	scaffold00033:1744379-1745199	Yes	annotated	ASTE006499	KB664651:+:79017-79049	54	3.68	1247.6	2.7	624.306	2		1	Testis
113	ASTEI07879	ALcSGQGEcTcGR	scaffold00059:+:796925-796963	exon extension	scaffold00059:796789-798400	Yes	annotated	ASTE003696	KB664444:-:1564682-1564720	81	3.02	1455.58	-0.48	728.292	2	C3(Carbamidomethyl); C9(Carbamidomethyl); C11(Carbamidomethyl)	2	Midgut; Salivary gland
114	ASTEI07909	SYTQETYLAK	scaffold00060:-:74888-74917	exon extension	scaffold00060:74717-75358	Yes	annotated	ASTE000637	KB664510:-:1958042-1958071	47	2.26	1203.59	-1.16	602.298	2		1	Midgut
115	ASTEI07989	DLTTDDAATLIQSVFR	scaffold00060:-:948995-949042	exon extension	scaffold00060:949,893-948,995	No	annotated	ASTE000712	-	116	4.35	1765.89	-1.16	883.451	2		6	Testis; Male accessory glands
116	ASTEI07479	TLIEFIAQSVVQcSDcGSSSSSSKSEK	scaffold00055:-:67552-67632	exon extension	scaffold00055:67,540-68,982	Yes	annotated	ASTE007887	-	89	5.61	2921.37	7.85	1461.19	2	C13(Carbamidomethyl); C16(Carbamidomethyl)	7	Testis
		TLIEFIAQSVVQcSDcGSSSSSSK	scaffold00055:-:67561-67632						-	131	9.57	2577.18	-2.03	1289.09	2	C13(Carbamidomethyl); C16(Carbamidomethyl)	215	Testis; Male accessory glands
		RGMAGRPTR	scaffold00055:-:67633-67659						-	33	3.56	1001.54	2.47	334.52	3		15	Testis
117	ASTEI07541	VMDDRNGLGPQAGYIGR	scaffold00055:+:1102330-1102380	exon extension	scaffold00055:1102251-1102380	Yes	exon extension	ASTE008890	KB664476:+:441841-441891	76	5.53	1818.89	-2.41	909.947	2		2	Brain
118	ASTEI05904	VGTGAFTLYSSALKDYADAVSH	scaffold00034:+:1801155-1801220	exon extension	scaffold00034:+:1800086-1801362		annotated	ASTE008506	KB665043:+:676531-676596	59	7.67	2273.12	5.11	758.378	3		2	Ovary; Salivary gland
119	ASTEI07471	LVVSGSSDNSIR	scaffold00055:+:1383-1418	exon extension	scaffold00055:1155-1417	Yes	exon extension	ASTE007895	KB664551:-:204732-204767	95	3.26	1233.64	-1.43	617.324	2		9	Brain; Testis; Maxillary palps; Midgut; Salivary gland
120	ASTEI07606	LLEVAHcQVTDR	scaffold00056:+:485600-485635	exon extension	scaffold00056:485,480-486561	No models	annotated	ASTE010933	-	71	3.49	1440.73	2.07	720.868	2	C7(Carbamidomethyl)	2	Testis
121	ASTEI04647	QVFVPTYNR	scaffold00024:1857590-1857616	exon extension	scaffold00024:1857593-1857737	Yes	exon extension	ASTE005674	KB664832:+:1116313-1116339	52	2.32	1123.59	3.06	562.3	2		1	Malpighian tubules
122	ASTEI04867	lNISVQQVNNR	scaffold00026:-:1023099-1023131						KB665065:+:1189536-1189568	65	4.29	1428.81	0.78	714.906	2	N-Term(iTRAQ4plex)	1	Midgut
123	ASTEI04954	NIDALKTVLQNAPLMcK	scaffold00027:-:73422-73472						KB664575:-:233129-233179	132	6.28	1929.03	-0.76	965.018	2	C16(Carbamidomethyl)	2	Midgut
124	ASTEI05040	DGVPVQPDENSNR	scaffold00027:+:1767657-1767695						KB664471:-:491786-491824	69	2.55	1426.66	0.19	713.832	2		14	Brain; Antennae; Fatbody; Midgut; Ovary; Pupae; Salivary gland
125	ASTEI05074	AQLSSAQSAAEK	scaffold00028:-:628889-628924	exon extension	scaffold00028:628745-629882	Yes	exon extension	ASTE007089	KB664756:-:29988-30023	79	3.86	1190.6	0.95	595.805	2		4	Testis
126	ASTEI09365	lESSHFYk	scaffold00089:-:596808-596831	exon extension	scaffold00089:596762-596896	Yes	novel exon	ASTE006741	KB664590:+:22058-22081	60	-	1298.7	0.64	649.853	2	N-Term(iTRAQ4plex); K8(iTRAQ4plex)	3	Midgut
		gkTNAQIQAILGGkk	scaffold00089:-:603118-603162						KB664590:+:15664-15708	26	4.69	2103.31	0.97	526.583	4	N-Term(iTRAQ4plex); K2(iTRAQ4plex); K14(iTRAQ4plex); K15(iTRAQ4plex)	2	Midgut
127	ASTEI09353	KTPEELAAEAEQEDLDDFTSK	scaffold00089:+:485722-485784	exon extension	scaffold00089:485647-485832	Yes	annotated	ASTE006741	-	56	4.6	2366.08	-1.7	789.366	3		1	Fatbody
		TPEELAAEAEQEDLDDFTSK	scaffold00089:+:485725-485784						-	132	6.9	2238	3.11	1119.5	2		8	Fatbody; Midgut; Ovary
128	ASTEI09386	ENEWcEEK	scaffold00090:-:184537-184560	exon extension	scaffold00090:184537-185022	Yes	annotated	ASTE009077	KB664810:-:823158-823181	37	1.79	1123.44	1.82	562.223	2	C5(Carbamidomethyl)	3	Testis; Male accessory glands; Midgut
		NDFTPAEEEQVRK	scaffold00090:-:184561-184599						KB664810:-:823182-823220	58	3.58	1562.74	-2.97	521.585	3		13	Brain; Antennae; Legs; Midgut; Ovary; Proboscis; Salivary gland
		TFNIKNDFTPAEEEQVRK	scaffold00090:-:184561-184614						KB664810:-:823182-823235	53	6.19	2166.1	7.72	722.705	3		3	Legs; Midgut
		nDFTPAEEEQVR	scaffold00090:-:184564-184599						KB664810:-:823185-823220	69	4.31	1578.76	3.05	789.882	2	N-Term(iTRAQ4plex)	2	Midgut
		NDFTPAEEEQVR	scaffold00090:-:184564-184599						KB664810:-:823185-823220	72	3.77	1434.65	-1.73	717.827	2		29	Brain; Testis; Antennae; Legs; Male accessory glands; Maxillary palps; Midgut; Ovary; Proboscis; Salivary gland
129	ASTEI09440	vVNGEAATLGQFPYQVR	scaffold00092:-:532629-532679						KB664345:-:192147-192197	92	6.54	1993.06	-1.89	997.033	2	N-Term(iTRAQ4plex)	3	Ovary; Malpighian tubules; Midgut; Fatbody
		VVNGEAATLGQFPYQVR	scaffold00092:-:532629-532679						KB664345:-:192147-192197	116	4.67	1848.96	0.61	924.984	2		28	Testis; Whole mosquito; Midgut; Pupae
130	ASTEI09471	TNPAYGVYAADNK	scaffold00093:+:323904-323942	exon extension	scaffold00093:323501-324007	Yes	annotated	ASTE004398	KB664688:+:1011029-1011067	100	4.39	1383.65	0.45	692.331	2		6	Brain; Antennae; Fatbody; Head; Proboscis
		QMNSPLQATR	scaffold00093:+:323979-324008						KB664688:+:1011104-1011133	29	2.26	1145.58	4.32	573.293	2		2	Brain; Fatbody
131	ASTEI09472	IPTENLLLK	scaffold00093:+:342396-342422						-	-	2.8	1040.64	0.22	520.821	2		1	Maxillary palps
		mPVVDSLTcLASDR	scaffold00093:+:342708-342749						KB664688:+:1027497-1027538	103	4.59	1579.75	0.61	790.377	2	M1(Oxidation); C9(Carbamidomethyl)	1	Haemolymph
		GVVSFSNTIDSSGLcNLK	scaffold00093:+:342952-343005	exon extension	scaffold00093:342881-343301				KB664688:+:1027741-1027794	100	4.71	1897.93	0.22	949.47	2	C15(Carbamidomethyl)	1	Maxillary palps
		QYIGFTDASQYIDWLYENTPNSGISDPILGHPNIR	scaffold00093:+:343006-343110						KB664688:+:1027795-1027899	62	6.52	3994.92	-0.73	1332.31	3		1	Haemolymph
132	ASTEI09512	YAPEQNAITWTIK	scaffold00095:+:320875-320913	exon extension	scaffold00095:319825-320922	Yes	annotated	ASTE003824	KB664478:-:106296-106334	78	3.83	1534.79	2.16	767.9	2		21	Testis; Antennae; Fatbody; Male accessory glands; Malpighian tubules; Maxillary palps; Midgut; Ovary; Proboscis; Pupae; Salivary gland
133	ASTEI10861	LRNYDETcQLV	scaffold00176:+:17565-17597	exon extension	scaffold00176:16914-17594	Yes	annotated	ASTE001431	-	21	-	1410.67	1.06	705.838	2	C8(Carbamidomethyl)	1	Midgut
134	ASTEI07134	lLLSTLSGk	scaffold00049:1167904-1167930	exon extension	scaffold00049:1166766-1167996	No	annotated	ASTE006781	KB665110:-:750214-750240	45	2.75	1219.79	-0.9	610.396	2	N-Term(iTRAQ4plex); K9(iTRAQ4plex)	1	Midgut
		LLLSTLSGk	scaffold00049:1167904-1167930
135	ASTEI07035	KPAEAPPQLPTV	scaffold00050:300374-300409	exon extension	scaffold00050:300272-300535	Yes	exon extension	ASTE006642	KB665199:+:747152-747187	53	2.54	1247.7	-0.17	624.353	2		4	Whole mosquito; Fatbody
136	ASTEI07180	ESPPIQTIPPWAR	scaffold00050:920899-920937	exon extension	scaffold00050:30921005-922483	Yes	exon extension	ASTE010100	-	79	2.72	1491.8	2.34	746.403	2		1	Fatbody
137	ASTEI07217	TTDSTADPGESNEAQK	scaffold00051:+:24122-24169	exon extension	scaffold00050:24122:24595	Yes	annotated	ASTE000782	-	65	3.73	1650.71	0.24	825.858	2		2	Ovary
		TSVAEEEEEPTK	scaffold00051:+:24170-24205						-	87	3.34	1348.61	-0.01	674.809	2		4	Midgut; Ovary; Salivary gland
138	ASTEI07259	TGGcIGNPIPLGFAcPK	scaffold00051:+:524721-524771	exon extension	scaffold00051:524620-524840	Yes	exon extension	ASTE00073	KB665232:-:82827-82877	87	5.02	1758.87	1.36	879.938	2	C4(Carbamidomethyl); C15(Carbamidomethyl)	4	Fatbody; Male accessory glands
139	ASTEI08310	VPAPGGDSASVcPVPATPK	scaffold00065:-:809333-809389	exon extension	scaffold00065:809075-809431	No	exon extension	ASTE007942	KB664461:+:218569-218625	115	6.46	1806.91	0.07	903.956	2	C12(Carbamidomethyl)	24	Fatbody; Male accessory glands; Midgut
		QPPPASLPATTNAK	scaffold00065:-:809390-809431						KB664461:+:218527-218568	67	3.81	1392.75	-1.58	696.877	2		4	Fatbody; Midgut
		KcAQVImDAAGLDSELYR	scaffold00065:-:813278-813331						KB664461:+:214620-214673	74	6.15	2055.99	2.72	686.001	3	C2(Carbamidomethyl); M7(Oxidation)	2	Head
140	ASTEI08159	QTNQIAGGTLYVVNR	scaffold00062:+:922636-922680	exon extension	scaffold00062:922534-922766	Yes	annotated	ASTE003651	KB664444:+:875654-875698	86	5.33	1633.87	0.27	817.437	2		3	Thorax; Midgut; Ovary
141	ASTEI07618	KEAPGAAINQAGIEEFKK	scaffold00056:+:683510-683563						-	73	8.98	1901.01	-2.19	634.341	3		7	Antennae; Malpighian tubules; Maxillary palps; Ovary
		EAPGAAINQAGIEEFK	scaffold00056:+:683513-683560						-	110	5.06	1644.82	-0.64	822.915	2		30	Testis; Antennae; Fatbody; Head; Legs; Malpighian tubules; Maxillary palps; Midgut; Ovary; Proboscis; Pupae; Salivary gland
		eAPGAAINQAGIEEFk	scaffold00056:+:683513-683560						-	117	6.3	1933.02	-4.79	967.013	2	N-Term(iTRAQ4plex); K16(iTRAQ4plex)	5	Ovary; Malpighian tubules; Midgut; Fatbody
142	ASTEI07663	ISDMITQIVDK	scaffold00057:+:350002-350034	exon extension	Exon4:scaffold00057:349598-350262	Yes	exon extension	ASTE006476	KB664288:+:3123923-3123955	46	2.24	1262.67	-0.34	631.836	2		1	Brain
		iSDMITQIVDk	scaffold00057:+:350002-350034						KB664288:+:3123923-3123955	51	4.64	1550.87	-1.24	775.938	2	N-Term(iTRAQ4plex); K11(iTRAQ4plex)	2	Ovary; Malpighian tubules; Midgut; Fatbody
143	ASTEI07752	HVTPTNIAPLGK	scaffold00058:+:268636-268671	exon extension	scaffold00058:268218-268696	Yes	exon extension	ASTE001333	KB665188:-:562876-562911	62	3.72	1247.71	0.13	624.359	2		3	Brain; Ovary
144	ASTEI05636	EEYLESIGDVTK	scaffold00032:-:1425002-1425037	exon extension	scaffold00032:1,425,002-1,425,493	Yes-Partial	annotated	ASTE010983	KB664521:+:243192-243227	91	3.27	1382.67	-0.35	691.838	2		5	Brain; Testis; Fatbody; Ovary
145	ASTEI01769	GLAEVSPLMcK	scaffold00006:+:2119369-2119401	exon extension	scaffold00006:+:2119318-2119444	Yes	exon extension	ASTE006312	KB664288:-:626776-626808	70	2.74	1204.61	-0.83	602.806	2	C10(Carbamidomethyl)	2	Brain; Midgut
		FNQVSHcSASR	scaffold00006:+:2119402-2119434						KB664288:-:626743-626775	76	3.59	1292.58	-0.16	646.794	2	C7(Carbamidomethyl)	6	Brain; Midgut; Ovary
146	ASTEI05588	SQGQMRPITK	scaffold00032:-:303315-303344	exon extension	scaffold00032:303,315-304,114	Yes	annotated	ASTE000951	KB664480:-:441052-441081	38	3.8	1145.61	0.79	573.309	2		1	Testis
147	ASTEI05662	GNAILQHLNTIPTR	scaffold00032:+:1808654-1808695						-	44	1.62	1547.87	0.52	516.627	3		1	Brain
		SELHSYVLR	scaffold00032:+:1808696-1808722						-	41	2.65	1103.59	1.87	552.297	2		4	Brain; Testis
148	ASTEI11037	AEQSITNYK	scaffold00282:+:13976-14002	exon extension	scaffold00282:13961-15633	No	protein extension	ASTE011795	KB664873:-:3500-3526	57	-	1053.52	0.25	527.264	2		1	Ovary
		VQAANVIVAR	scaffold00282:+:14033-14062						KB664873:-:3440-3469	76	3.26	1040.62	-0.02	520.814	2		2	Ovary
149	ASTEI11204	RFQNVSAK	scaffold00660:-:4244-4267	exon extension	scaffold00660:3446-4462	Yes	annotated	ASTE000051	KB664921:-:812401-812424	36	-	949.518	-3.11	475.263	2		1	Testis
150	ASTEI08688	SAAYINSIEKIFQTYADAGLAF	scaffold00073:426346-426411	exon extension	scaffold00073:426,346-426,614	No	exon extension	ASTE002912	KB664488:-:1144912-1144977	108	-	2393.21	1.12	1197.11	2		1	Thorax
151	ASTEI08702	EAFNAISK	scaffold00073:860464-860487	exon extension	scaffold00073:859981-860487	Yes	exon extension	ASTE002925	KB664488:+:1589158-1589181	45	1.64	879.456	-0.93	440.232	2		1	Midgut
152	ASTEI08999	WILEPTDK	scaffold00080:270393-270416	exon extension	scaffold00080:270308-270417	Yes	exon extension	ASTE000102	KB664954:-:899819-899842	29	2.02	1001.53	-1.72	501.268	2		2	Brain
153	ASTEI09053	TITITGNPDSVALAQYLINMR	scaffold00081:-:459121-459183	exon extension	scaffold00081:459121-459398	Yes	exon extension	ASTE010175	KB665154:+:133391-133453	126	5.17	2291.2	-3.47	1146.1	2		1	Brain
		tITITGNPDSVALAQYLINmR	scaffold00081:-:459121-459183						KB665154:+:133391-133453	55	3.76	2451.31	4.59	817.776	3	N-Term(iTRAQ4plex); M20(Oxidation)	1	Midgut
		LIVPASQcGSLIGK	scaffold00081:-:468955-468996	exon extension	scaffold00081:468,954-469,056	No			KB665154:+:123450-123491	66	3.76	1442.8	0.09	721.906	2	C8(Carbamidomethyl)	22	Brain; Testis; Fatbody; Head; Legs; Ovary
		lIVPASQcGSLIGk	scaffold00081:-:468955-468996						KB665154:+:123450-123491	99	4.24	1719.97	-2.04	860.489	2	N-Term(iTRAQ4plex); C8(Methylthio); K14(iTRAQ4plex)	1	Ovary; Malpighian tubules; Midgut; Fatbody
154	ASTEI09116	VPQYTLQDVR	scaffold00083:+:572138-572167	exon extension	scaffold00083:571,925-572,647	Yes	novel exon	ASTE011455	-	66	3.23	1218.65	3.51	609.83	2		2	Brain
		FVEELGEGAFGK	scaffold00083:+:572168-572203						-	85	3.15	1282.64	3.84	641.822	2		3	Brain
		EIELISDLK	scaffold00083:+:572309-572335						KB664667:+:30320-30346	45	1.63	1059.59	0.27	530.3	2		1	Brain
		DIYSSDYYR	scaffold00083:+:572621-572647						KB664667:+:30632-30658	39	1.16	1181.51	0.17	591.259	2		1	Brain
155	ASTEI11217	IITTPQATAIGVAGSSGK	scaffold00731:-:3589-3642	exon extension	scaffold00731:3550-3733	Yes	annotated	ASTE001239	KB664482:-:221236-221289	111	5.23	1671.93	1.46	836.469	2		107	Brain; Salivary gland; Testis; Antennae; Fatbody; Head; Haemolymph; Larvae; Legs; Male accessory glands; Malpighian tubules; Maxillary palps; Midgut; Ovary; Proboscis
		iITTPQATAIGVAGSSGk	scaffold00731:-:3589-3642						KB664482:-:221236-221289	112	5.1	1960.13	-1.51	980.568	2	N-Term(iTRAQ4plex); K18(iTRAQ4plex)	4	Ovary; Malpighian tubules; Midgut; Fatbody
156	ASTEI08133	VTEPPRGFK	scaffold00062:+:684537-684563	exon extension	scaffold00062:684537-684935	Yes	exon extension	ASTE003620	KB664444:+:558919-558945	37	-	1030.57	-1.44	515.787	2		1	Midgut
157	ASTEI08110	GSQITDDEIR	scaffold00062:-:537550-537579	exon extension	scaffold00062:537478-537579	Yes	exon extension	ASTE003596	KB664444:-:405733-405762	77	3.07	1133.55	1.53	567.276	2		7	Brain; Testis; Midgut; Ovary
158	ASTEI03131	sFFVEALDAIPSVPESEQR	scaffold00013:+:1584669-1584725	exon extension	scaffold00013:1584669-1584725	No	exon extension	ASTE006906	KB664843:+:1822509-1822565	23	4.1	2265.14	-3.76	755.719	3	N-Term(iTRAQ4plex)	1	Ovary; Malpighian tubules; Midgut; Fatbody
		SFFVEALDAIPSVPESEQR	scaffold00013:+:1584669-1584725						KB664843:+:1822509-1822565	87	4.66	2121.05	0.98	1061.03	2		3	Brain; Midgut; Ovary
159	ASTEI03271	DDYSYGYAVR	scaffold00014:-:559598-559627						-	40	3.32	1208.52	-4.11	604.762	2		2	Head
		ESSDYDRDDYSYGYAVR	scaffold00014:-:559598-559648						-	61	5.14	2060.84	-1.25	1030.93	2		65	Salivary gland; Antennae; Brain; Head; Legs; Maxillary palps; Proboscis; Testis
160	ASTEI03387	SFAAPVAYSSPVAYTAPVVAR	scaffold00014:+:1662316-1662378	exon extension	scaffold00014:1662184-1662894	No	exon extension	ASTE003152	KB664548:+:257915-257977	135	6.52	2124.11	1.08	1062.56	2		122	Malpighian tubules; Salivary gland; Testis; Antennae; Brain; Fatbody; Head; Larvae; Legs; Male accessory glands; Maxillary palps; Midgut; Ovary; Proboscis; Pupae
		sFAAPVAYSSPVAYTAPVVAR	scaffold00014:+:1662316-1662378						KB664548:+:257915-257977	119	6.34	2268.22	0.68	1134.61	2	N-Term(iTRAQ4plex)	7	Ovary; Malpighian tubules; Midgut; Fatbody
		rIVNYYADPINGFNAVVQk	scaffold00014:+:1662748-1662804						KB664548:+:258347-258403	56	7	2469.35	1.05	823.789	3	N-Term(iTRAQ4plex); K19(iTRAQ4plex)	2	Midgut
		RIVNYYADPINGFNAVVQK	scaffold00014:+:1662748-1662804						KB664548:+:258347-258403	83	7.68	2181.17	11.07	727.728	3		15	Testis; Brain; Fatbody; Malpighian tubules; Midgut; Ovary; Proboscis
		iVNYYADPINGFNAVVQk	scaffold00014:+:1662751-1662804						KB664548:+:258350-258403	74	5.71	2313.25	1.22	771.755	3	N-Term(iTRAQ4plex); K18(iTRAQ4plex)	5	Ovary; Malpighian tubules; Midgut; Fatbody
		IVNYYADPINGFNAVVQK	scaffold00014:+:1662751-1662804						KB664548:+:258350-258403	92	6.59	2025.05	3.04	1013.03	2		86	Brain; Malpighian tubules; Testis; Antennae; Fatbody; Head; Legs; Midgut; Ovary; Proboscis; Pupae; Salivary gland
		IVNYYADPINGFNAVVQKDIPVAVATPAVAVAAK	scaffold00014:+:1662751-1662852						KB664548:+:258350-258451	42	-	3498.9	0.65	1166.97	3		2	Malpighian tubules; Whole mosquito
161	ASTEI09751	MELSIPLIELPNAFGVSVRK	scaffold00102:+:284766-284825						-	37	3.44	2213.23	-0.96	738.416	3		1	Salivary gland
		GWSLPLDYISVER	scaffold00102:+:284871-284909						-	80	3.72	1534.79	0.72	767.899	2		31	Thorax; Salivary gland; Haemolymph
162	ASTEI09760	dGAYVFIEHck	scaffold00102:+:354436-354468	exon extension	scaffold00102:354364-354468	No	exon extension	ASTE009892	-	35	4.19	1615.79	5.18	539.269	3	N-Term(iTRAQ4plex); C10(Methylthio); K11(iTRAQ4plex)	1	Ovary; Malpighian tubules; Midgut; Fatbody
		DGAYVFIEHcK	scaffold00102:+:354436-354468						-	51	2.89	1338.62	1.68	669.812	2	C10(Carbamidomethyl)	1	Midgut
163	ASTEI06268	ADTAFFWEER	scaffold00038:+:1194359-1194388	exon extension	scaffold00038:1194189-1196163	Yes	annotated	ASTE011613	KB664677:-:487190-487219	58	3.63	1271.57	-1.96	636.287	2		1	Testis
		DVKPDNMLLDK	scaffold00038:+:1194605-1194637						KB664677:-:486941-486973	42	3.01	1287.66	0.97	644.335	2		3	Fatbody; Salivary gland
		SSSAVGTPDYISPEVLQFQGEK	scaffold00038:+:1194704-1194769						KB664677:-:486809-486874	132	5.61	2339.14	-1.49	1170.07	2		9	Midgut; Ovary
		SHPFFVNDTWTFENVR	scaffold00038:+:1195014-1195061						KB664677:-:486518-486565	83	4.68	1995.95	5.44	998.476	2		2	Ovary
		DSVPPVVPELSSDDDTR	scaffold00038:+:1195062-1195112						KB664677:-:486467-486517	89	3.65	1827.86	-1.21	914.433	2		8	Testis; Midgut; Ovary
164	ASTEI006994	SEEMSLcQLFLQSEAAYAcVSELGELGLVQFR	scaffold00046:+:1314705-1314800	exon extension	scaffold00046:1314623-1314803	Yes	annotated	ASTE002868	KB664488:+:572155-572250	83	3.26	3664.74	2.37	1222.25	3	C7(Carbamidomethyl); C19(Carbamidomethyl)	3	Brain
165	ASTEI07011	TNETQVYVASAHK	scaffold00047:+:202810-202848	exon extension	scaffold00047:201625-202923	Yes	exon extension	ASTE010847	KB664910:+:305140-305178	91	4.57	1447.72	-0.28	724.362	2		28	Thorax; Brain; Testis; Antennae; Legs; Male accessory glands; Malpighian tubules; Midgut; Ovary; Salivary gland
166	ASTEI10278	SPNQSTTGSGQYKPSVSNR	scaffold00122:+:48504-48560	exon extension	scaffold00122:48496-48683	Yes	annotated	ASTE000838	KB664420:+:308267-308323	93	7.31	1994.95	0.3	665.656	3		4	Brain; Testis
167	ASTEI10797	AGGENQLSLR	scaffold00165:+:83049-83078	Exon extenssion	scaffold00165:82801-83745	Yes	protein extension	ASTE008548	KB664445:-:364918-364947	71	3.12	1044.54	-1.68	522.774	2		1	Midgut
		HSWYHGPISR	scaffold00165:+:83205-83234						KB664445:-:364762-364791	-	0.75	1239.61	2.91	620.306	2		1	Brain
		DFLEEAAIMK	scaffold00165:+:83682-83711						KB664445:-:364285-364314	55	1.61	1166.58	-0.45	583.792	2		1	Brain
168	ASTEI03021	GPSGSGGmEANSSGATSEPK	scaffold00012:+:1981459-1981518	exon extension	scaffold00012:1981423-1983051	Yes	annotated	ASTEI03021	KB664621:-:40761-40820	118.0	5.23	1823.77141	0.05	912.38934	2	M8(Oxidation)	4	Brain
		GPSGSGGMEANSSGATSEPK	scaffold00012:+:1981459-1981518						KB664621:-:40761-40820	118.0	5.23	1823.77141	0.05	912.38934	2	M8(Oxidation)	4	Brain
169	ASTEI04643	SQVESRDGDVVK	scaffold00024:-:1743560-1743595						KB664832:-:962320-962355	51.0	3.2	1318.65886	-0.71	659.83307	2		2	Head

## Sheet: Table S5.4_Protein extentions
Supplemental Table S5.4 - A summary of results from proteogenomics analysis
Protein extensions
Prasad et al., 2016. Integrating transcriptomic and proteomic data for accurate assembly and annotation of genomes
	Gene(s) involved (in Indian)	Category of protein correction (Indian)	Existing genomic coordinates of gene (Indian)	Revised genomic coordinates of the gene (Indian)	Peptide sequence	Genomic coordinates of identified peptide (Indian)	Transcript evidence (Yes/no)	Category of gene correction (in SDA500)	Gene involved (in SDA500)	Genomic coordinates of identified peptide (SDA500)	Mascot score	Sequest score	MH+1	Mass error (ppm)	m/z	Charge	# Missed cleavage	Modification(s)	PSMs	Tissues detected
1	ASTEI05294	N-terminal protein extension	scaffold00029:2003391-2006895	scaffold00029:-:2002036-2009331	WHADQRPDVFGVGSVPAFQR	scaffold00029:-:2008718-2008777	Yes	Annotated	ASTE003348	KB664412:-:569322-569381	36.0	6.12	2269.12314	-1.36	757.04590	3	0		3	Brain
					VEPGGPASAGIHHHR	scaffold00029:-:2008778-2008822				KB664412:-:569382-569426	66.0	5.48	1521.76565	-0.89	381.19687	4	0		2	Brain
					QPPISGHPLEQPSNR	scaffold00029:-:2008841-2008885				KB664412:-:569445-569489	72.0	4.06	1656.84514	-0.10	828.92621	2	0		1	Brain
					qPPISGHPLEQPSNR	scaffold00029:-:2008841-2008885				KB664412:-:569445-569489	72.0	4.06	1656.84514	-0.10	828.92621	2	0		1	Brain
2	ASTEI01955	C-terminal protein extension	scaffold00007:1542277-1550545	scaffold00007:+:1542277-1553720	APESSQLTGITR	scaffold00007:+:1551116-1551151		joining of genes	ASTE000033 and ASTE000034		-	2.34	1259.65618	-2.29	630.33173	2	0		1	Ovary
3	ASTEI02033	N-terminal protein extension	scaffold00007:3683892-3684954	scaffold00007:3683718-3685400	QPYGVPLGQEAR	scaffold00007:-:3685150-3685185	Yes	protein extension	ASTE002984	KB664520:-:279187-279222	51.0	2.98	1314.67412	-4.57	657.84070	2	0		1	Testis
4	ASTEI02146	N-terminal protein extension	scaffold00008:1423517-1428536	scaffold00008:1420696-1430235	SSGLQEPATQQEK	scaffold00008:+:1421475-1421513	Yes	Annotated	ASTE010256	KB664655:-:317750-317788	39.0	3.81	1402.68340	1.77	701.84534	2	0		1	Brain
					ETPAPEHATTPAR	scaffold00008:+:1422888-1422926				KB664655:-:316322-316360	53.0	4.09	1377.67656	0.57	689.34192	2	0		2	Brain
5	ASTEI06139	N-terminal protein extension	scaffold00036:1480584-1481423	scaffold00036:1480122-1481522	TVPAQAPFTVAPLPER	scaffold00036:+:1480437-1480484	Yes	N-terminal protein extension	ASTE004997	KB664606:-:145906-145953	90.0	3.25	1693.93157	2.54	847.46942	2	0		6	Testis; Fatbody; Midgut; Ovary; Proboscis
					VQGPDSVSFLQGLmTNDMR	scaffold00036:+:1480497-1480553				KB664606:-:145837-145893	38.0	2.63	2110.99370	1.89	1056.00049	2	0	M14(Oxidation)	1	Testis
6	ASTEI06552	N-terminal protein extension	scaffold00041:1370188-1371360	scaffold00041:1369897-1371360	LVSNLLDNAPSDAVDHFEEYcR	scaffold00041:1369927-1369992	no	Annotated	ASTE002121	-	108.0	7.72	2564.19292	8.04	1282.60010	2	0	C21(Carbamidomethyl)	16	Testis; Male accessory glands
					IDFLSPDYR	scaffold00041:1370002-1370028				-	70.0	-	1125.56023	2.39	563.28375	2	0		1	Testis
					QTLSALAETENENVcYNSK	scaffold00041:1370098-1370154				-	108.0	4.25	2171.00078	3.96	1086.00403	2	0	C15(Carbamidomethyl)	1	Testis
7	ASTEI06528				VIVLDKGQIVEFAPPAELLQSK	scaffold00041:-:813348-813413				KB664457:+:413442-413507	35.0	4.8	2394.35831	-2.54	798.79095	3	1		4	Malpighian tubules; Maxillary palps; Salivary gland
					vIVLDkGQIVEFAPPAELLQSk	scaffold00041:-:813348-813413				KB664457:+:413442-413507	35.0	4.8	2394.35831	-2.54	798.79095	3	1		4	Malpighian tubules; Maxillary palps; Salivary gland
					lNTIMDSDkVIVLDk	scaffold00041:-:813396-813440				KB664457:+:413415-413459	28.0	3.92	2136.23362	1.19	712.74939	3	1	N-Term(iTRAQ4plex); K9(iTRAQ4plex); K15(iTRAQ4plex)	1	Midgut
					lNTIMDSDk	scaffold00041:-:813414-813440				KB664457:+:413415-413441	56.0	3.45	1324.70281	0.52	662.85504	2	0	N-Term(iTRAQ4plex); K9(iTRAQ4plex)	2	Midgut
					LNTIMDSDK	scaffold00041:-:813414-813440				KB664457:+:413415-413441	56.0	3.45	1324.70281	0.52	662.85504	2	0	N-Term(iTRAQ4plex); K9(iTRAQ4plex)	2	Midgut
					LNTImDSDK	scaffold00041:-:813414-813440				KB664457:+:413415-413441	56.0	3.45	1324.70281	0.52	662.85504	2	0	N-Term(iTRAQ4plex); K9(iTRAQ4plex)	2	Midgut
					lNTImDSDk	scaffold00041:-:813414-813440				KB664457:+:413415-413441	56.0	3.45	1324.70281	0.52	662.85504	2	0	N-Term(iTRAQ4plex); K9(iTRAQ4plex)	2	Midgut
					VLILDEATAAVDLETDDLIQR	scaffold00041:-:813492-813494					114	4.62	2313.22	-0.2	1157.11	2	0		6	0
						scaffold00041:-:813566-813625
					iNLDPFNAQSDDDIWk	scaffold00041:-:813852-813899				KB664457:+:412956-413003	84.0	4.76	2179.08623	-2.21	1090.04675	2	0	N-Term(iTRAQ4plex); K16(iTRAQ4plex)	4	Ovary; Malpighian tubules; Midgut; Fatbody
					INLDPFNAQSDDDIWK	scaffold00041:-:813852-813899				KB664457:+:412956-413003	84.0	4.76	2179.08623	-2.21	1090.04675	2	0	N-Term(iTRAQ4plex); K16(iTRAQ4plex)	4	Ovary; Malpighian tubules; Midgut; Fatbody
					sSLTLALFR	scaffold00041:-:814029-814055				KB664457:+:412800-412826	53.0	4.19	1151.69170	1.03	576.34949	2	0	N-Term(iTRAQ4plex)	2	Midgut
					SSLTLALFR	scaffold00041:-:814029-814055				KB664457:+:412800-412826	53.0	4.19	1151.69170	1.03	576.34949	2	0	N-Term(iTRAQ4plex)	2	Midgut
					EGLELVLR	scaffold00041:-:814122-814145				-	61.0	2.25	928.54625	-0.01	464.77676	2	0		3	Testis; Ovary
					YREGLELVLR	scaffold00041:-:814122-814151				KB664457:+:412704-412733	40.0	3.03	1247.70755	-2.52	416.57404	3	1		1	Maxillary palps
					yREGLELVLR	scaffold00041:-:814122-814151				KB664457:+:412704-412733	40.0	3.03	1247.70755	-2.52	416.57404	3	1		1	Maxillary palps
					QEAAWELPNSTLPR	scaffold00041:-:814200-814241				KB664457:+:412614-412655	89.0	4.55	1611.81157	-0.65	806.40942	2	0		19	Testis; Fatbody; Malpighian tubules; Midgut; Pupae; Salivary gland; Ovary
					mTSDVETNIVAVER	scaffold00041:-:814266-814307				KB664457:+:412548-412589	133.0	4.07	1579.76384	0.35	790.38556	2	0	M1(Oxidation)	6	Testis; Fatbody; Midgut
					mTSDVETNIVAVER	scaffold00041:-:814266-814307				KB664457:+:412548-412589	133.0	4.07	1579.76384	0.35	790.38556	2	0	M1(Oxidation)	6	Testis; Fatbody; Midgut
					MTSDVETNIVAVER	scaffold00041:-:814266-814307				KB664457:+:412548-412589	133.0	4.07	1579.76384	0.35	790.38556	2	0	M1(Oxidation)	6	Testis; Fatbody; Midgut
8	ASTEI06476	N-terminal protein extension	scaffold00041:65485-70221	scaffold00041:64991-70221	TELATDNMK	scaffold00041:65464-65490	Yes	Annotated	ASTE009792	KB664564:-:235615-235641	56.0	2.14	1022.48039	-1.90	511.74384	2	0		1	Testis
9	ASTEI06523	C-terminal protein extension	scaffold00041:787057-787808	scaffold00041:787057-789812	ENLPTLTEESSmDDWWK	scaffold00041:787873-787923	Yes	Annotated	ASTE009455	KB664457:-:438958-439008	81.0	2.72	2096.90923	-1.24	1048.95825	2	0	M12(Oxidation)	2	Testis
					VYDATVQHHQQFMGLK	scaffold00041:787924-787971				KB664457:-:438910-438957	52.0	3.55	1901.93166	-0.57	476.23837	4	0		2	Testis
10	ASTEI06592	N-terminal protein extension	scaffold00042:629806-632031	scaffold00042:627792-632974	PTANQNLR	scaffold00042:632668-632691	Yes	Annotated	ASTE003564	KB664443:+:182908-182931	53.0	-	913.48393	-1.21	457.24561	2	0		3	Brain; Testis
					KLQQQDSSER	scaffold00042:-:631626-631653				-	62	3.85	1218.61	1.9	609.808	2	1		3	Testis
					KLQQQDSSER	scaffold00042:-:632659-632660				-	62	3.85	1218.61	1.9	609.808	2	1		3	Testis
11	ASTEI00095	C-terminal protein extension	scaffold00001:1422808-1429094	scaffold00001:1420450-1431890	DMVLATGPAESER	scaffold00001:-:1420929-1420967	Yes	Annotated	ASTE009979	KB664532:+:99227-99265	62.0	3.21	1375.65447	1.58	688.33087	2	0		3	Brain; Testis; Midgut
					dmVLATGPAESER	scaffold00001:-:1420929-1420967				KB664532:+:99227-99265	62.0	3.21	1375.65447	1.58	688.33087	2	0		3	Brain; Testis; Midgut
					LNTIMDSDR	scaffold00001:-:1421049-1421075				KB664532:+:99119-99145	56.0	1.92	1064.50347	-0.63	532.75537	2	0		1	Fatbody
					LIQDTIR	scaffold00001:-:1421118-1421138				KB664532:+:99056-99076	-	1.22	858.50768	3.84	429.75748	2	0		1	Antennae
					vSIIPQDPVLFSGTLRR	scaffold00001:-:1421451-1421501				KB664532:+:98692-98742	-	3.75	2042.19229	2.12	681.40228	3	1	N-Term(iTRAQ4plex)	1	Midgut
					skVSIIPQDPVLFSGTLRR	scaffold00001:-:1421451-1421507				KB664532:+:98686-98742	14.0	3.43	2401.41567	-0.57	601.10938	4	2	N-Term(iTRAQ4plex); K2(iTRAQ4plex)	1	Midgut
					SKVSIIPQDPVLFSGTLR	scaffold00001:-:1421454-1421507				KB664532:+:98686-98739	45.0	4.93	1957.10758	-2.15	653.04071	3	1		2	Malpighian tubules
					sPVFSHLSASLAGLPTIR	scaffold00001:-:1422105-1422158				KB664532:+:98035-98088	47.0	4.9	1997.13718	3.54	666.38391	3	0	N-Term(iTRAQ4plex)	4	Ovary; Malpighian tubules; Midgut; Fatbody
					SPVFSHLSASLAGLPTIR	scaffold00001:-:1422105-1422158				KB664532:+:98035-98088	47.0	4.9	1997.13718	3.54	666.38391	3	0	N-Term(iTRAQ4plex)	4	Ovary; Malpighian tubules; Midgut; Fatbody
					DMGSVDELLPK	scaffold00001:-:1422336-1422368				KB664532:+:97825-97857	56.0	2.49	1203.59331	0.56	602.30029	2	0		6	Malpighian tubules; Midgut
					dmGSVDELLPk	scaffold00001:-:1422336-1422368				KB664532:+:97825-97857	56.0	2.49	1203.59331	0.56	602.30029	2	0		6	Malpighian tubules; Midgut
					DmGSVDELLPK	scaffold00001:-:1422336-1422368				KB664532:+:97825-97857	56.0	2.49	1203.59331	0.56	602.30029	2	0		6	Malpighian tubules; Midgut
					SISFYQTSVR	scaffold00001:-:1422474-1422503				KB664532:+:97690-97719	57.0	2.26	1187.60320	-1.97	594.30524	2	0		4	Testis; Malpighian tubules; Midgut
					sISFYQTSVR	scaffold00001:-:1422474-1422503				KB664532:+:97690-97719	57.0	2.26	1187.60320	-1.97	594.30524	2	0		4	Testis; Malpighian tubules; Midgut
12	ASTEI00276	N-terminal protein extension	scaffold00001:4341121-4345426	scaffold00001:4,341,121-4,345,549	AVAANGSPGLNNDGTAALR	scaffold00001:-:4345427-4345483	Yes	Annotated	ASTE009958	KB664290:502876-502932	110.0	3.75	1768.91277	10.75	884.96002	2	0		2	Testis
13	ASTEI09166	C-terminal protein extension	scaffold00084:247757-252701	scaffold00084:252723-246539	EENAPCHTAAAMADQR	scaffold00084:247194-247168	Yes	Annotated	ASTE004718	KB664988:+:632815-632862	49.0	4.56	1787.74399	0.19	596.58618	3	0	C6(Carbamidomethyl); M12(Oxidation)	1	Brain
					NQPEDLPASTEPSTVSSETK	scaffold00084:247109-247242				KB664988:+:632890-632949	85.0	3.87	2116.98638	-0.84	1058.99683	2	0		1	Ovary
					LSPEESPQDCSAK	scaffold00084:247242-247281				KB664988:+:632776-632814	59.0	2.58	1447.63652	-0.34	724.32190	2	0	C1(Carbamidomethyl)	3	Brain; Ovary
14	ASTEI09237	N-terminal protein extension	scaffold00085:719699-728837	scaffold00085:729534-727879	GEENLVEITDAK	scaffold00085:729099-729134	Yes	N-terminal protein extension	ASTE004687	KB664513:361068-361068	60.0	2.63	1317.65325	-0.06	659.33026	2	0		1	Ovary
15	ASTEI07998	C-terminal protein extension			HQIETEGPR	scaffold00060:1112509-1112535	Yes	Annotated	ASTE000722	KB664510:+:3010034-3010060	54.0	3.17	1066.52629	-1.26	533.76678	2	0		2	Testis
					NNPNTLQTDAPK	scaffold00060:1112578-1112613				KB664510:+:3010103-3010138	58.0	3.26	1312.64983	0.46	656.82855	2	0		2	Brain
16	ASTEI08283	N-terminal protein extension	scaffold00065:445262-452147	scaffold00065:441268-452756	SVDDATGDASQHTER	scaffold00065:+:445046-445090	Yes	Annotated	ASTE000023	KB664530:-:93408-93452	107.0	5.17	1588.68242	-0.65	794.84485	2	0		3	Brain
17	ASTEI07827	N-terminal protein extension	scaffold00058:958192-967602	scaffold00058:956915-98431	NVQQHQQQQTLPR	scaffold00058:-:970007-970045	Yes	N-terminal protein extension	ASTE3385	KB664558:-:206468-206506	70.0	3.55	1604.83097	3.58	535.61517	3	0		1	Testis
18	ASTEI07092	N-terminal protein extension	scaffold00048:1281042-1283873	scaffold00048:1277943-1284046	YLAVTQPLNYSR	scaffold00048:1283904-1283939	Yes	Annotated	ASTE008828	KB664356:-:596521-596556	55.0	-	1424.75359	0.22	712.88043	2	0		1	Brain
19	ASTEI07104	N-terminal protein extension	scaffold00049:436409-437077	scaffold00049:431034-437450	QSTEWWDPQGPIR	scaffold00049:437090-437128	Yes	Annotated	ASTE000005	KB664650:-:72344-72382	77.0	4.09	1599.76164	4.09	800.38446	2	0		7	Testis; Malpighian tubules; Midgut; Ovary; Salivary gland
					TQYSNVDQR	scaffold00049:437150-437176				KB664650:-:72404-72430	56.0	2.31	1110.51909	1.48	555.76318	2	0		3	Testis; Head; Midgut
20	ASTEI02235	N-terminal protein extension	scaffold00008:2582170-2582895	scaffold00008:2578080-2582895	DVQAHTHASLGK	scaffold00008:2580450-2580485	Yes	N-terminal protein extension	ASTE009550	-	15.0	-	1263.64368	-0.31	421.88608	3	0		1	Brain
					sSSIQITADDKPATGLITPTK	scaffold00008:2613841-2613903				KB664400:-:860254-860316	93.0	-	2186.16190	3.08	1093.58459	2	0	N-Term(Acetyl)	3	Legs
21	ASTEI07376	N-terminal protein extension	scaffold00053:935290-935792	scaffold00053:931443-939296	SADAEQVEEmNGFEK	scaffold00053:935775-935819	Yes	N-terminal protein extension	ASTE002689	KB664543:+:24088-24132	108.0	5.01	1683.72673	5.93	842.36700	2	0		12	Testis; Antennae; Midgut; Ovary
					WKGYDSSSNSWEPR	scaffold00053:936039-936080				KB664543:+:23827-23868	87.0	5.08	1698.76274	7.07	849.88501	2	1		2	Ovary
					GKVEYLLK	scaffold00053:936081-936104				KB664543:+:23803-23826	42.0	2.91	949.57311	1.45	475.29019	2	1		6	Brain; Testis; Legs
22	ASTEI02374	C-terminal protein extension	scaffold00009:1084511-1096491	scaffold00009:1084511-1099366	eNPGIkVTEIAk	scaffold00009:+:1094064-1094099				KB664494:-:75712-75747	57.0	4.21	1731.03960	1.10	866.02344	2	1	N-Term(iTRAQ4plex); K6(iTRAQ4plex); K12(iTRAQ4plex)	1	Midgut
					ENPGIKVTEIAK	scaffold00009:+:1094064-1094099				KB664494:-:75712-75747	57.0	4.21	1731.03960	1.10	866.02344	2	1	N-Term(iTRAQ4plex); K6(iTRAQ4plex); K12(iTRAQ4plex)	1	Midgut
					MKDEYNKQmQDFER	scaffold00009:+:1094335-1094376				KB664494:-:75435-75476	32.0	3.47	1877.80130	-7.69	626.60529	3	2	M9(Oxidation)	2	Antennae
					mKDEYNKQmQDFER	scaffold00009:+:1094335-1094376				KB664494:-:75435-75476	32.0	3.47	1877.80130	-7.69	626.60529	3	2	M9(Oxidation)	2	Antennae
					kkDSEDEDDESGDESD	scaffold00009:+:1094446-1094493				KB664494:-:75318-75365	38.0	3.18	2231.96683	1.43	744.66046	3	2	N-Term(iTRAQ4plex); K1(iTRAQ4plex); K2(iTRAQ4plex)	1	Midgut
23	ASTEI02380	N-terminal protein extension	scaffold00009:1120664-1123061	scaffold00009:1120567-1123061	HVQAISEK	scaffold00009:+:1120610-1120633	Yes	N-terminal protein extension	ASTE002018	KB664494:-:49146-49169	51.0	3.42	911.49498	0.48	456.25113	2	0		1	Testis
24	ASTEI02305	N-terminal protein extension	scaffold00009:125194-125708	scaffold00009:124411-125194	TPYYSGNNWATYDEQR	scaffold00009:+:124741-124788	no	Annotated	ASTE004577	KB665143:+:130660-130707	108.0	5.02	1964.83855	-1.24	982.92291	2	0		2	Fatbody
25	ASTEI02407	N-terminal protein extension	scaffold00009:1890606-1892820	scaffold00009:1890606-1893095	TSSDTQLDKVQIK	scaffold00009:+:1890666-1890704	Yes	N-terminal protein extension	ASTE001573	KB665077:-:475814-475852	108.0	4.67	1462.77153	-2.25	731.88940	2	1		2	Midgut
26	ASTEI10271	C-terminal protein extension	scaffold00121:273310-276062	scaffold00121:273310-269285	STFNTLLK	scaffold00121:-:269262-269285	Yes	Annotated	ASTE001080	KB664799:+:781912-781935	35.0	-	923.52062	1.00	462.26395	2	0		1	Salivary gland
					lNTVMDSDk	scaffold00121:-:269465-269491				KB664799:+:781706-781732	-	2.84	1310.68608	-0.29	655.84668	2	0	N-Term(iTRAQ4plex); K9(iTRAQ4plex)	1	Midgut
					FNDcTVLTIAHR	scaffold00121:-:269492-269527				KB664799:+:781670-781705	41.0	3.51	1446.72461	6.05	482.91306	3	0	C4(Carbamidomethyl)	1	Salivary gland
					LIQQTIR	scaffold00121:-:269534-269554				KB664799:+:781643-781663	55.0	1.44	871.53588	-0.16	436.27158	2	0		2	Salivary gland; Testis
					ILVMDEATANVDPQTDKLIQQTIR	scaffold00121:-:269534-269605				KB664799:+:781592-781663	49.0	4.91	2712.42276	-0.38	904.81244	3	1		1	Proboscis
					ILVMDEATANVDPQTDK	scaffold00121:-:269555-269605				KB664799:+:781592-781642	95.0	2.2	1859.92082	8.17	930.46405	2	0		2	Testis; Salivary gland
					iNEGGSNFSVGQR	scaffold00121:-:269648-269686				KB664799:+:781511-781549	115.0	3.8	1364.66118	4.25	682.83423	2	0		11	Testis; Antennae; Fatbody; Maxillary palps; Ovary; Proboscis; Pupae; Salivary gland
					INEGGSNFSVGQR	scaffold00121:-:269648-269686				KB664799:+:781511-781549	115.0	3.8	1364.66118	4.25	682.83423	2	0		11	Testis; Antennae; Fatbody; Maxillary palps; Ovary; Proboscis; Pupae; Salivary gland
					YNLDPFDEYPDEK	scaffold00121:-:269759-269797				KB664799:+:781400-781438	84.0	4.11	1644.71074	2.60	822.85901	2	0		4	Testis; Fatbody; Salivary gland
					akLSIIPQEPVLFSGTLR	scaffold00121:-:269798-269851				KB664799:+:781346-781399	28.0	4.68	2257.35385	0.69	753.12280	3	1	N-Term(iTRAQ4plex); K2(iTRAQ4plex)	1	Midgut
					SSLINALFR	scaffold00121:-:269924-269950				KB664799:+:781247-781273	73.0	3.07	1020.58415	0.44	510.79572	2	0		10	Testis; Malpighian tubules; Maxillary palps; Ovary; Proboscis; Salivary gland
					sSLINALFR	scaffold00121:-:269924-269950				KB664799:+:781247-781273	73.0	3.07	1020.58415	0.44	510.79572	2	0		10	Testis; Malpighian tubules; Maxillary palps; Ovary; Proboscis; Salivary gland
					KPPKEWPQEGR	scaffold00121:-:270080-270112				KB664799:+:781085-781117	61.0	3.16	1351.71357	1.32	451.24271	3	1		1	Testis
					VVEYDNVDPEPALEAPADK	scaffold00121:-:270113-270169				KB664799:+:781028-781084	99.0	5.39	2070.99248	2.79	1035.99988	2	0		9	Testis; Maxillary palps; Midgut; Ovary; Proboscis; Salivary gland
					QSAELENTMTSVER	scaffold00121:-:270170-270211				KB664799:+:780986-781027	68.0	4.23	1594.73857	0.48	797.87292	2	0		1	Midgut
					SPIYSHLSASLSGLSTIR	scaffold00121:-:270455-270508				KB664799:+:780689-780742	53.0	6.81	1889.01175	-0.53	630.34210	3	0		4	Larvae; Proboscis; Salivary gland
					sPIYSHLSASLSGLSTIR	scaffold00121:-:270455-270508				KB664799:+:780689-780742	53.0	6.81	1889.01175	-0.53	630.34210	3	0		4	Larvae; Proboscis; Salivary gland
					ASMYFFNTNPSGR	scaffold00121:-:270811-270849				KB664799:+:780348-780386	68.0	3.12	1491.66899	0.28	746.33813	2	0		4	Maxillary palps; Proboscis; Salivary gland
27	ASTEI10455	N-terminal protein extension	scaffold00132:176041-177090	scaffold132:175632-177090	LKHEIASSNTTTNR	scaffold00132:+:175632-175673	Yes	Annotated	ASTE003684	KB664444:+:1334296-1334337	74.0	3.62	1571.81485	0.76	524.60980	3	1		3	Testis; Haemolymph
						scaffold00132:+:176032-176041				-
28	ASTEI10518	N-terminal protein extension	scaffold00137:110009-110917	scaffold00137:90900-116317	MEVEVFSR	scaffold00137:+:90939-90962				KB664704:+:76333-76356	-	2.5	996.48113	-0.83	498.74420	2	0		2	Brain; Ovary
					TFHRFEIEVPEEVR	scaffold00137:+:91316-91357				KB664704:+:76710-76751	-	3.53	1787.91391	3.54	596.64282	3	1		1	Salivary gland
					TIQAAVcR	scaffold00137:+:91480-91503				KB664704:+:76874-76897	72.0	-	918.48241	-0.21	459.74484	2	0	C7(Carbamidomethyl)	2	Midgut; Ovary
					ATMIQEMHFR	scaffold00137:+:91564-91593				KB664704:+:76958-76987	34.0	-	1263.59607	-1.00	421.87021	3	0		1	Brain
					LQSSGGFTDEFK	scaffold00137:+:91743-91759;110009-110027				-	71	2.85	1315.62	-0.95	658.311	2	0		2	Ovary
29	ASTEI10518	C-terminal protein extension	scaffold00137:110009-110917	scaffold00137:90900-116317	SGNSNYMDAR	scaffold00137:+:111250-111279	Yes	joining of genes	ASTE014832; ASTE006495	KB664760:-:11951-11980	83.0	3.35	1114.45586	-2.14	557.73157	2	0		1	Ovary
					RGGSTVVASSSGTSGGTDQAR	scaffold00137:+:111313-111375				KB664760:-:11855-11917	97.0	7.33	1937.93071	1.80	969.46899	2	1		7	Brain; Ovary
					GGSTVVASSSGTSGGTDQAR	scaffold00137:+:111316-111375				KB664760:-:11855-11914	85.0	5.37	1781.82639	0.16	594.61365	3	0		5	Brain; Ovary
					QTQQQHQHQSNQHSSSQNQQQNTENTSTSSK	scaffold00137:+:116225-116317				KB664760:-:6744-6836	55.0	6.19	3565.56409	0.26	713.91864	5	0		1	Ovary
30	ASTEI11552	N-terminal protein extension	scaffold04661:61-674	scaffold04661:1-1360	EmAEEYSTDTGVVLR	scaffold04661:+:58-102	Yes	Annotated	ASTE003679	KB664444:+:1303241-1303285	71.0	2.91	1715.78301	2.14	858.39514	2	0	M2(Oxidation)	1	Testis
					EMAEEYSTDTGVVLR	scaffold04661:+:58-102				KB664444:+:1303241-1303285	71.0	2.91	1715.78301	2.14	858.39514	2	0	M2(Oxidation)	1	Testis
					SSIIHGNVR	scaffold04661:+:1-27				KB664444:+:1303184-1303210	50	-	982.54460	1.74	491.77594	2	0		1	Testis
31	ASTEI00841	C-terminal protein extension	scaffold00003:2834263-2840878	scaffold00003:-:2828983-2841341	STSEGEAEPVAK	scaffold00003:-:2831556-2831591	Yes	N-terminal protein extension	ASTE005393	KB664635:-:95408-95443	62.0	2.49	1204.57097	1.43	602.78912	2	0		1	Head
					STAAATTTDSVEAEK	scaffold00003:-:2831649-2831693				KB664635:-:95501-95545	88.0	4.74	1481.69695	0.21	741.35211	2	0		10	Brain; Testis; Male accessory glands; Ovary; Salivary gland
					DGAATVAEDVK	scaffold00003:-:2831694-2831726				KB664635:-:95546-95578	58.0	-	1075.52788	1.13	538.26758	2	0		1	Brain
					AKDGAATVAEDVK	scaffold00003:-:2831694-2831732				KB664635:-:95546-95584	85.0	4.71	1274.66533	5.16	637.83630	2	1		1	Testis
					VTSDIPSKDNIPVEEVATTTSTTTSTTEAK	scaffold00003:-:2831733-2831822				-	65.0	5.5	3123.54453	0.54	1041.85303	3	1		1	Head
					MDLDKPDAPVEPEKPIAAAETSEK	scaffold00003:-:2832216-2832287				KB664635:-:96068-96139	66.0	4.83	2581.26944	-0.34	861.09467	3	0		1	Testis
					MEEEDSPVETPK	scaffold00003:-:2832303-2832338				KB664635:-:96155-96190	69.0	3.42	1390.60222	-1.52	695.80475	2	0		2	Testis; Salivary gland
					TEATEENGTTENK	scaffold00003:-:2832483-2832521				KB664635:-:96335-96373	69.0	3.78	1423.61821	-0.12	712.31274	2	0		2	Ovary
32	ASTEI01766	C-terminal protein extension	scaffold00006:2101472-2102251	scaffold00006:2100236-2103189	cHLTLVYSK	scaffold00006:-:2100609-2100635	Yes	C-terminal protein extension	ASTE006314	KB664288:+:638681-638707	56.0	4.26	1120.58196	-0.01	560.79462	2	0	C1(Carbamidomethyl)	24	Brain; Salivary gland; Testis; Male accessory glands; Malpighian tubules; Midgut; Ovary
					EcTSEScGAGVFmAAHEDRHYcGK	scaffold00006:-:2100636-2100707				KB664288:+:638609-638680	-	6.02	2775.10341	0.67	694.53131	4	1	C2(Carbamidomethyl); C7(Carbamidomethyl); M13(Oxidation); C22(Carbamidomethyl)	1	Midgut
					REcTSEScGAGVFmAAHEDRHYcGK	scaffold00006:-:2100636-2100710				KB664288:+:638606-638680	15.0	3.63	2931.20205	-0.21	733.55597	4	2	C3(Carbamidomethyl); C8(Carbamidomethyl); M14(Oxidation); C23(Carbamidomethyl)	1	Midgut
					ecTSEScGAGVFMAAHEDR	scaffold00006:-:2100651-2100707				KB664288:+:638609-638665	57.0	7.37	2235.86094	-4.90	745.95850	3	0	N-Term(iTRAQ4plex); C2(Methylthio); C7(Methylthio)	3	Ovary; Malpighian tubules; Midgut; Fatbody
					EcTSEScGAGVFMAAHEDR	scaffold00006:-:2100651-2100707				KB664288:+:638609-638665	57.0	7.37	2235.86094	-4.90	745.95850	3	0	N-Term(iTRAQ4plex); C2(Methylthio); C7(Methylthio)	3	Ovary; Malpighian tubules; Midgut; Fatbody
					EcTSEScGAGVFmAAHEDR	scaffold00006:-:2100651-2100707				KB664288:+:638609-638665	57.0	7.37	2235.86094	-4.90	745.95850	3	0	N-Term(iTRAQ4plex); C2(Methylthio); C7(Methylthio)	3	Ovary; Malpighian tubules; Midgut; Fatbody
					REcTSEScGAGVFMAAHEDR	scaffold00006:-:2100651-2100710				KB664288:+:638606-638665	73.0	8.23	2269.94876	4.55	757.32111	3	1	C3(Carbamidomethyl); C8(Carbamidomethyl)	6	Male accessory glands; Midgut; Ovary
					REcTSEScGAGVFmAAHEDR	scaffold00006:-:2100651-2100710				KB664288:+:638606-638665	73.0	8.23	2269.94876	4.55	757.32111	3	1	C3(Carbamidomethyl); C8(Carbamidomethyl)	6	Male accessory glands; Midgut; Ovary
33	ASTEI01450	C-terminal protein extension	scaffold00005:2446410-2447256	scaffold00005:2439547-2447597	EEISASVVDAEER	scaffold00005:+:2443845-2443883	Yes	Annotated	ASTE002356	#ERROR!	67.0	3.23	1433.66387	-8.13	717.33557	2	0		2	Midgut; Ovary
					AAAIVPSSPQPK	scaffold00005:+:2444796-2444831				KB664977:-:476572-476607	-	2.18	1165.65788	0.23	583.33258	2	0		1	Brain
					NSVSATSTSLQNISR	scaffold00005:+:2444832-2444876				KB664977:-:476527-476571	78.0	3.58	1564.79131	-0.82	782.89929	2	0		1	Ovary
34	ASTEI01310	N-terminal protein extension	scaffold00005:1129898-1133359	scaffold00005:1125276-1134719	RHPPSGNVEVSSMSAK	scaffold00005:+:1125661-1125708	Yes	Annotated	ASTE005845	KB664289:+:929632-929679	93.0	5.89	1682.82932	0.81	561.61462	3	1		6	Brain; Salivary gland
					RHPPSGNVEVSSmSAK	scaffold00005:+:1125661-1125708				KB664289:+:929632-929679	93.0	5.89	1682.82932	0.81	561.61462	3	1		6	Brain; Salivary gland
					FVDTEWEAR	scaffold00005:+:1125709-1125735				KB664289:+:929680-929706	63.0	3.33	1152.53520	2.72	576.77124	2	0		2	Brain; Testis
35	ASTEI01352	N-terminal protein extension	scaffold00005:1447671-1451646	scaffold00005:1437831-1451646	KTDTQMNVAGIR	scaffold00005:+:1447656-1447691	Yes	Annotated	ASTE005887	KB664289:+:1296466-1296501	87.0	2.9	1333.68974	0.31	667.34851	2	1		1	Brain
36	ASTEI01884	C-terminal protein extension	scaffold00006:4138883-4154420	scaffold00006:4133125-4162785	TATGGGAAGPSNYTGAR	scaffold00006:+:4158811-4158861	Yes	joining of genes	ASTE007270 and ASTE007271	KB664417:-:137026-137076	108.0	5.37	1508.70769	-0.79	754.85748	2	0		3	Brain; Testis
					LSPSSSISSSSLSSK	scaffold00006:+:4159066-4159110				KB664417:-:136777-136821	51.0	3.14	1453.74260	3.10	727.37494	2	0		1	Testis
37	ASTEI02772	C-terminal protein extension	scaffold00011:800681-801894	scaffold00011:799,416-801,996	FmEQHPEmDFSK	scaffold00011:-:800552-800587	Yes	Annotated	ASTE001034	KB664721:-:1047774-1047809	86.0	3.61	1525.64995	3.18	763.32861	2	0		5	Testis
					fMEQHPEMDFSk	scaffold00011:-:800552-800587				KB664721:-:1047774-1047809	86.0	3.61	1525.64995	3.18	763.32861	2	0		5	Testis
					FMEQHPEMDFSK	scaffold00011:-:800552-800587				KB664721:-:1047774-1047809	86.0	3.61	1525.64995	3.18	763.32861	2	0		5	Testis
					FmEQHPEMDFSK	scaffold00011:-:800552-800587				KB664721:-:1047774-1047809	86.0	3.61	1525.64995	3.18	763.32861	2	0		5	Testis
38	ASTEI02861	C-terminal protein extension	scaffold00011:2175183-2176260	scaffold00011:2174830-2178607	LPSNVNYHR	scaffold00011:+:2176541-2176567	Yes	novel exon	ASTE010448	KB664844:-:43395-43421	70.0	3.85	1099.57523	9.90	367.19659	3	0		4	Brain; Testis
					DLGQGAFGR	scaffold00011:+:2176637-2176663				KB664844:-:43299-43325	51.0	-	920.45879	0.30	460.73303	2	0		1	Brain
					EAcLLAEFDHPNIVK	scaffold00011:+:2176775-2176819				KB664844:-:43143-43187	77.0	4.94	1755.87297	-0.31	878.44012	2	0	C3(Carbamidomethyl)	3	Brain
					GDLNEFLR	scaffold00011:+:2176880-2176903				KB664844:-:43059-43082	-	2.14	963.48699	-2.58	482.24713	2	0		1	Brain
					QcSPFAQQNR	scaffold00011:+:2176904-2176933				KB664844:-:43029-43058	66.0	3.35	1235.56011	1.20	618.28369	2	0	C2(Carbamidomethyl)	1	Brain
					ADSISTELSHGDLLNIAHQIASGMVYLSER	scaffold00011:+:2176934-2177023				KB664844:-:42939-43028	53.0	6.43	3227.60703	2.10	1076.54053	3	0		4	Brain
					IADFGLSHK	scaffold00011:+:2177087-2177113				KB664844:-:42849-42875	67.0	2.16	987.52672	0.88	494.26700	2	0		3	Brain
					IYLQDYYKGDENDAIPIR	scaffold00011:+:2177114-2177167				KB664844:-:42795-42848	97.0	4.75	2186.07280	-1.69	1093.54004	2	1		2	Brain
					GDENDAIPIR	scaffold00011:+:2177138-2177167				KB664844:-:42795-42824	65.0	2.1	1099.53984	1.77	550.27356	2	0		2	Brain
					WMPLESILYNK	scaffold00011:+:2177168-2177200				KB664844:-:42762-42794	47.0	2.4	1393.71758	-0.66	697.36243	2	0		3	Brain; Testis
39	ASTEI02925	N-terminal protein extension	scaffold00011:3130902-3152130	scaffold00011:3113312-3153637	VFHAPmQAGTPFEFR	scaffold00011:+:3130887-3130931	Yes	protein extension	ASTE002734	KB665010:+:384035-384079	33.0	5.23	1750.83213	-2.83	584.28223	3	0	M6(Oxidation)	1	Brain
					VFHAPMQAGTPFEFR	scaffold00011:+:3130887-3130931				KB665010:+:384035-384079	33.0	5.23	1750.83213	-2.83	584.28223	3	0		1	Brain
40	ASTEI02925	C-terminal protein extension	scaffold00011:3130902-3152130	scaffold00011:3113312-3153637	HGLQPVEYIHVDR	scaffold00011:+:3152131-3152169	Yes	C-terminal protein extension	ASTE002734		69.0	5.69	1562.80826	0.52	521.60760	3	0		4	Brain
41	ASTEI03028	N-terminal protein extension	scaffold00012:2109152-2110276	scaffold00012:2,108,639-2,114,117	DTAIETVTTcATVcPQVFDPR	scaffold00012:+:2109029-2109091	Yes	Annotated	ASTE006524	KB664472:+:104390-104452	126.0	4.5	2381.11235	0.45	1191.05981	2	0	C1(Carbamidomethyl); C14(Carbamidomethyl)	8	Midgut
42	ASTEI03189	C-terminal protein extension	scaffold00013:2307095-2309039	scaffold00013:2,305,993-2,309,272	EAHVDEFVR	scaffold00013:-:2306896-2306922	Yes	Annotated	ASTE006962		44.0	2.47	1101.53240	0.00	551.26984	2	0		3	Brain; Testis; Midgut
					ENILYGLNMGEK	scaffold00013:-:2306956-2306991					50.0	2.51	1380.67864	-3.05	690.84296	2	0		2	Fatbody; Salivary gland
43	ASTEI00995	N-terminal protein extension	scaffold00004:29758-31660	scaffold00004:29151-31665	aAVcFGcK	scaffold00004:+:29716-29739	Yes	Annotated	ASTE010552	KB664448:+:29338-29361	60.0	-	954.41728	0.05	477.71228	2	0	N-Term(Acetyl); C4(Carbamidomethyl); C7(Carbamidomethyl)	3	Testis; Legs; Ovary
					aAVcFGcKEEIKDK	scaffold00004:+:29716-29757				KB664448:+:29338-29379	68.0	-	1696.82085	10.29	848.91406	2	2	N-Term(Acetyl); C4(Carbamidomethyl); C7(Carbamidomethyl)	24	Legs; Male accessory glands; Maxillary palps; Proboscis
44	ASTEI01394	C-terminal protein extension	scaffold00005:1817174-1830152	scaffold00005:-:1812691-1851327	SGSTGGPGPEWK	scaffold00005:-:1815588-1815623	Yes	exon extension	ASTE005928	KB664289:-:1667742-1667777	75.0	2.86	1159.54057	2.31	580.27393	2	0		1	Testis
					KVHMTTSSTSSSSTTMK	scaffold00005:-:1815624-1815674				KB664289:-:1667778-1667828	95.0	6.04	1800.84610	-0.33	600.95355	3	1		5	Testis; Legs; Male accessory glands
					EHHYQQQQQQQVIHTK	scaffold00005:-:1815675-1815722				KB664289:-:1667829-1667876	77.0	7.58	2060.00591	0.10	1030.50659	2	0		5	Testis; Legs; Male accessory glands
					YQQSQSPSHGFYNK	scaffold00005:-:1816056-1816097				KB664289:-:1668222-1668263	53.0	4.89	1670.75626	0.29	557.59027	3	0		2	Testis
45	ASTEI01466	N-terminal protein extension	scaffold00005:2647179-2715965	scaffold00005:2641587-2642408	QQQQQFVQR	scaffold00005:+:2642243-2642269	Yes	N-terminal protein extension	ASTE002332; ASTE002333; ASTE002334; ASTE002335 and ASTE014261	KB664977:-:285790-285816	73.0	3.24	1189.60723	-0.05	595.30725	2	0		2	Fatbody; Midgut
					QEFSQQQQFSSSQQR	scaffold00005:+:2642270-2642314				KB664977:-:285745-285789	102.0	5.49	1842.83562	-0.52	921.92145	2	0		6	Fatbody; Legs; Male accessory glands; Midgut
46	ASTEI01483	C-terminal protein extension	scaffold00005:2805090-2808717	scaffold00005:2804511-2809360	YEPINLDDIYGTLK	scaffold00005:2808858-2808899	Yes	Annotated	ASTE002313	KB664977:113143-113102	82.0	2.24	1653.83855	0.89	827.42291	2	0		1	Testis
47	ASTEI04127	N-terminal protein extension	scaffold00020:1854894-1855106		DAETNEIVAVK	scaffold00020:1854138-1855099		Annotated	ASTE005218	KB664522:-:337722-337754	56.0	2.91	1188.60344	-6.12	594.80536	2	0		3	Testis; Midgut; Ovary
					LLHELQHENIIGLLDVFGHK					KB664522:-:337593-337652	29.0	3.27	2325.27529	1.64	582.07428	4	0		1	Testis
					DLKPNNLLISGTGVLK					KB664522:-:337389-337436	66.0	3.62	1682.00078	9.51	841.50403	2	0		1	Ovary
					iGDFGLAk					KB664522:-:337365-337388	-	2.35	820.46111	5.76	410.73419	2	0		1	Ovary
					IGDFGLAK					KB664522:-:337365-337388	-	2.35	820.46111	5.76	410.73419	2	0		1	Ovary
					VPFLPGESDLDQLTR					KB664522:-:337173-337217	111.0	3.48	1686.86540	-2.61	843.93634	2	0		4	Testis; Ovary
					IFQVLGTPNETNWPDVK					KB664522:-:337122-337172	74.0	3.69	1958.01555	6.98	979.51141	2	0		1	Ovary
					DIFTAASEDLIELANK					KB664522:-:337023-337070	94.0	3.88	1749.89189	0.73	875.44958	2	0		4	Ovary; Testis
48	ASTEI03796	N-terminal protein extension	scaffold00017:1268434-1268793		QAAMAQQSGETSTAR	scaffold00017:+:1268425-1268469		protein extension	ASTE010737	KB664555:63764-63720	94.0	3.97	1536.70964	1.61	768.85846	2	0		2	Testis
49	ASTEI02183	N-terminal protein extension	scaffold00008:1891172-1891489	scaffold00008:1891033-1891487	KSSPIDTSK	scaffold00008:+:1891034-1891060	no	protein extension	ASTE009493	na	71.0	3.96	962.51409	-1.30	481.76068	2	1		3	Testis
					QGTGQTPPHNAAEPSK	scaffold00008:+:1891067-1891114					71.0	4.33	1619.77995	1.64	810.39362	2	0		3	Testis
50	ASTEI03953	N-terminal protein extension	scaffold00019:466625-518980	scaffold00019:464,535-519,365	LcDGTSDcYmGSDELR	scaffold00019:-:519150-519197	Yes	Annotated	ASTE07690	KB664463:+:431542-431589	117.0	4.35	1878.73186	0.80	939.86957	2	0	C2(Carbamidomethyl); C8(Carbamidomethyl)	5	Salivary gland
					LcDGTSDcYMGSDELR	scaffold00019:-:519150-519197				KB664463:+:431542-431589	117.0	4.35	1878.73186	0.80	939.86957	2	0	C2(Carbamidomethyl); C8(Carbamidomethyl)	5	Salivary gland
					HVGIFGLK	scaffold00019:-:519291-519314				KB664463:+:431425-431448	-	3.32	870.52110	1.68	435.76419	2	0		1	Salivary gland
51	ASTEI04217	N-terminal protein extension	scaffold00021:1320223-1321722	scaffold00021:1317721-1328822	QTmAEVGTSSSGDGESAAPDKPK	scaffold00021:+:1319146-1319214	Yes	exon extension	ASTE011266	KB665287:-:1092446-1092514	67.0	5.29	2266.01657	1.10	756.01038	3	0	M3(Oxidation)	1	Brain
					aEVGTSSSGDGESAAPDKPK	scaffold00021:+:1319155-1319214				KB665287:-:1092446-1092505	78.0	-	1931.88205	-0.48	644.63220	3	0	N-Term(Acetyl)	5	Brain; Testis; Antennae; Proboscis
52	ASTEI04217	C-terminal protein extension	scaffold00021:1320223-1321722	scaffold00021:1317721-1328822	LSGVSAVAAVAAGAVSSR	scaffold00021:+:1324917-1324970	Yes	exon extension	ASTE011266	KB665287:-:1086690-1086743	90.0	4.8	1572.87297	1.58	786.94012	2	0		3	Brain
53	ASTEI04494	C-terminal protein extension	scaffold00023:1541349-1544800	scaffold00023:1541349-1549741	RQHVPTDAIQQK	scaffold00023:+:1545236-1545271	Yes	novel exon	ASTE004361	KB665121:-:838600-838635	51.0	4.24	1420.77042	3.40	474.26166	3	1		1	Testis
					AATTVPVSGSPPNR	scaffold00023:+:1547720-1547761				KB665121:-:836078-836119	35.0	2.24	1353.71379	1.20	677.36053	2	0		2	Testis
					ATTNNVTTETDTRPSK	scaffold00023:+:1549155-1549202				KB665121:-:835130-835177	53.0	5.6	1735.84294	-1.62	868.42511	2	0		2	Brain
54	ASTEI04266	N-terminal protein extension	scaffold00021:2179664-2185753	scaffold00021:2178634-2201717	sSSGDFGNPLR	scaffold00021:-:2200505-2200537				KB665287:+:200909-200941	71.0	-	1178.54363	-0.06	589.77545	2	0	N-Term(Acetyl)	12	Brain; Midgut; Maxillary palps; Ovary; Proboscis; Salivary gland
55	ASTEI03244	N-terminal protein extension	scaffold00014:331098-335915	scaffold00014:330898-331154	qFVPFAQGDTAFITVTQk	scaffold00014:331009-331062	Yes	protein extension	ASTE002074	KB664469: 319121-319068	-	3.02	2286.24332	2.63	762.75262	3	0	N-Term(iTRAQ4plex); K18(iTRAQ4plex)	2	Ovary; Malpighian tubules; Midgut; Fatbody
56	ASTEI03254	N-terminal protein extension	scaffold00014:381631-382737	scaffold00014:380915-385449	AAGSDDHVLR	scaffold00014:381213-381242	Yes	Annotated	ASTE002064	KB664469 :270789 -270760	80.0	4.3	1040.51409	2.00	520.76068	2	0		11	Testis
					KQEEVLQESMMMIPDcQR	scaffold00014:381243-381296				KB664469 :270759 -270706	61.0	7.39	2529.17704	-4.46	843.73053	3	1	N-Term(iTRAQ4plex); K1(iTRAQ4plex); C16(Methylthio)	1	Ovary; Malpighian tubules; Midgut; Fatbody
					AYEELTEMIK	scaffold00014:381399-381428				KB664469 :270603-270556	67.0	3.37	1226.59831	0.77	613.80280	2	0		2	Testis
					AYEELTEMIKNEEELK	scaffold00014:381399-381446				KB664469 :270603 -270556	97.0	5.19	1968.92729	-10.08	984.96729	2	1		4	Testis; Fatbody; Midgut
					NEEELKESEQYQAAVAVLDDAK	scaffold00014:381429-381494				KB664469 :270573-270508	69.0	6.11	2479.19052	2.80	827.06836	3	1		2	Testis; Fatbody
					ESEQYQAAVAVLDDAK	scaffold00014:381447-381494				KB664469 :270555 -270508	81.0	4.23	1736.83550	0.97	868.92139	2	0		5	Testis; Ovary
57	ASTEI03664	C-terminal protein extension	scaffold00016:1250147-1262112	scaffold00016:1249838-1250147	QGGILGDSIK	scaffold00016:1249948-1249977				KB664323:28982-28953	69.0	3.63	987.54943	2.46	494.27835	2	0		8	Testis; Antennae; Ovary; Proboscis; Salivary gland
					VNGDEADPLYK	scaffold00016:1249993-1250025				KB664323:29030-28998	98.0	3.73	1220.57793	-1.21	610.79260	2	0		17	Testis; Antennae; Fatbody; Legs; Maxillary palps; Midgut; Proboscis; Ovary
58	ASTEI03959	N-terminal protein extension	scaffold00019:655728-656146	scaffold00019:654,882-656,681	TAQGSEDENERGQYGFGR	scaffold00019:+:655524-655577				KB664463:-:295223-295276	45.0	3.69	2000.87455	2.59	667.62970	3	1		1	Brain
59	ASTEI04120	N-terminal protein extension	scaffold00020:1814851-1817213	scaffold00020:1,814,845-1,817,612	IVEcSGTSQVSVMGR	scaffold00020:-:1817205-1817249	Yes	Annotated	ASTE005223	KB664522:+:375278-375322	133.0	4.15	1609.76641	-0.58	805.38684	2	0	C4(Carbamidomethyl)	12	Midgut
					IVEcSGTSQVSVmGR	scaffold00020:-:1817205-1817249				KB664522:+:375278-375322	133.0	4.15	1609.76641	-0.58	805.38684	2	0	C4(Carbamidomethyl)	12	Midgut
					cESDSSWSDcSASAR	scaffold00020:-:1817250-1817294				KB664522:+:375233-375277	67.0	5.03	1704.61980	-1.59	852.81354	2	0	C1(Carbamidomethyl); C1(Carbamidomethyl)	2	Midgut
60	ASTEI04003	N-terminal protein extension	scaffold00019:1294762-1300796	scaffold00019:1275833-1302383	FLEVLQNDFR	scaffold00019:+:1276744-1276773	Yes	protein extension	ASTE004271	KB664643:-:82384-82413	84.0	3.48	1280.66496	1.21	640.83612	2	0		6	Testis; Midgut; Salivary gland
61	ASTEI02638	N-terminal protein extension	scaffold00010:1970075-1986896	scaffold00010:1491128-1987200	FGEITEVMVMK	scaffold00010:+:1693397-1693429	Yes	protein extension	ASTE011178	no	70.0	2.52	1283.63677	-0.56	642.32202	2	0		1	Brain
					VLAHGTHELDGK	scaffold00010:+:1710238-1710273					61.0	3.71	1276.66509	0.47	638.83618	2	0		7	Brain; Antennae; Fatbody; Male accessory glands
					GFGFITFGDPASVDK	scaffold00010:+:1710193-1710237					84.0	3.57	1557.75847	0.00	779.38287	2	0		8	Brain; Antennae; Malpighian tubules; Salivary gland
62	ASTEI04520	C-terminal protein extension	scaffold00023:1867459-1869055	scaffold00023:1867240-1873700	SDDEETTAAAPSK	scaffold00023:+:1872236-1872274	Yes	Annotated	ASTE004333	KB665121:-:453166-453204	52.0	2.8	1321.57549	0.02	661.29138	2	0		1	Ovary
					LEFEYEVEAEQPAR	scaffold00023:+:1872329-1872370				KB665121:-:453070-453111	115.0	4.32	1709.79912	-1.56	855.40320	2	0		3	Ovary; Salivary gland
63	ASTEI03813	N-terminal protein extension	scaffold00017:1797375-1798819	scaffold00017:1796522-1811126	VVNIYTEFHEFSR	scaffold00017:-:1810588-1810626	Yes	protein extension	ASTE011361	KB664644: 481498-481460	47.0	4.09	1640.80625	-0.33	547.60693	3	0		3	Legs; Midgut
64	ASTEI03717	N-terminal protein extension	scaffold00017:87218-93375	scaffold00017:85476-104852	NSSPEDGPQGSVPK	scaffold00017:-:103785-103826	Yes	Annotated	ASTE010820	KB664555:1287122-1287163	56.0	1.9	1398.64983	0.14	699.82855	2	0		1	Salivary gland
					VISSGIEPSAGHVR	scaffold00017:-:103833-103874				KB664555:1287074-1287115	47.0	-	1408.74578	-6.10	704.87653	2	0		1	Brain
					ETVHGQHHPVQSTVGADK	scaffold00017:-:103902-103955				KB664555:1286993-1287046	62.0	5.21	1926.94168	-0.02	642.98541	3	0		2	Male accessory glands
65	ASTEI03580	N-terminal protein extension	scaffold00015:2184791-2191272	scaffold00015:2177581-2177628	aETYEEYEETHHVTR	scaffold00015:+:2177581-2177625	Yes	protein extension	ASTE000255	-	74.0	-	1935.82695	-4.45	968.41711	2	0	N-Term(Acetyl)	13	Testis; Brain; Whole mosquito; Legs; Male accessory glands; Maxillary palps; Ovary; Proboscis
					aETYEEYEETHHVTRK	scaffold00015:+:2177581-2177628					25.0	-	2063.94468	6.85	688.65308	3	1	N-Term(Acetyl)	1	Male accessory glands
66	ASTEI03603	N-terminal protein extension	scaffold00015:2700931-2709491	scaffold00015:2676552-2712115	sYQMPQNR	scaffold00015:2684818-2684841	Yes	protein extension	ASTE000921	-	29.0	-	1065.47881	0.54	533.24304	2	0	N-Term(Acetyl)	1	Brain
67	ASTEI04473	N-terminal protein extension	scaffold00023:1234057-1236886	scaffold00023:1233916-1235215	VKVTYSMMSR	scaffold00023:+:1234039-1234068	Yes	Annotated	ASTE006147	KB665243:-:269338-269367	69.0	-	1201.60443	-1.99	401.20633	3	1		1	Salivary gland
68	ASTEI04373	C-terminal protein extension	scaffold00022:1581510-1585388	scaffold00022:1581302-1586543	ATTQALQDFAR	scaffold00022:+:1585519-1585551	Yes	novel exon	ASTE003393	KB664627:-:129338-129370	93.0	3.59	1221.63213	8.06	611.31970	2	0		15	Brain; Fatbody; Male accessory glands; Malpighian tubules; Midgut; Ovary; Pupae; Salivary gland; Testis
69	ASTEI04214	N-terminal protein extension	scaffold00021:1303559-1309214	scaffold00021:1302793-1313451	aSVTATEQSRK	scaffold00021:-:1312046-1312078	Yes	Annotated	ASTE011269	KB665287:+:1099582-1099614	54.0	-	1219.62773	-0.02	610.31750	2	1	N-Term(Acetyl)	3	Legs; Midgut
70	ASTEI03616	N-terminal protein extension	scaffold00016:391145-402726	scaffold00016:370114-422306	EMAEGNGEVVEEMANQK	scaffold00016:+:391142-391192	Yes	novel exon	ASTE002399	KB665054:370572-370622	111.0	4.53	1864.80376	-0.81	932.90552	2	0		2	Testis
71	ASTEI03616	C-terminal protein extension	scaffold00016:391145-402726	scaffold00016:370114-422306	WAPWQQQPPGGPTGSASGHR	scaffold00016:408734-408793	Yes	protein extension	ASTE002400	KB665054 :401252 -401311	96.0	6.83	2101.99809	1.38	1051.50269	2	0		31	Brain; Salivary gland; Testis; Antennae; Male accessory glands; Maxillary palps; Midgut; Ovary
					GGGGGPWAGSNSSQR	scaffold00016:408815-408859				KB665054 :401333-401377	80.0	4.07	1374.61162	-2.16	687.80945	2	0		4	Brain; Testis; Fatbody; Midgut
					GEYGGWSWTWNHGTWPNR	scaffold00016:408690-408733					68	5.84	2190.96	4.54	730.992	3	0		5	Brain; Legs; Maxillary palps; Proboscis; Salivary glands
72	ASTEI03840	C-terminal protein extension	scaffold00017:2337713-2338637	scaffold00017:2337716-2353672	VLESASNSLIPNLIK	scaffold00017:-:2353508-2353552	no	Annotated	ASTE011390	KB664644 :1031605 -1031561	87.0	3.16	1597.91399	-1.27	799.46063	2	0		3	Salivary gland
73	ASTEI03845	N-terminal protein extension	scaffold00017:2404559-2410402	scaffold00017:-:2400510-2410911	FNGEQFLEMK	scaffold00017:-:2403266-2403295	Yes	Annotated	ASTE011395	KB664644 :1081114-1081085	74.0	3.01	1242.58281	0.33	621.79504	2	0		1	Testis
74	ASTEI03564	N-terminal protein extension	scaffold00015:1787964-1791724	scaffold00015:1785888-1791724	IHPAGQLDPTPDSTSK	scaffold00015:+:1786556-1786603	Yes	Annotated	ASTE000273	KB664732 :829263 -829216	53.0	2.13	1663.82219	-3.89	832.41473	2	0		1	Brain
75	ASTEI02891	N-terminal protein extension		scaffold00012:-:1128434-1128517	SPYVFLVPILHSSEEGLIQVINDNVLEK	scaffold00012:1,128,419-1,128,535	Yes	protein extension	ASTE008630	KB664621:+:899185-899268	48.0	5.19	3152.69529	2.34	1051.56995	3	0		1	Brain
76	ASTEI05054	C-terminal protein extension	scaffold00028:14801-17431	scaffold00028:14,796-18,546	SRPLKGPSSSTHNQHYQ	scaffold00028:+:17137-17187	Yes	Annotated	ASTE005681	KB664452:+:28886-28936	42.0	7.07	1923.93862	-1.78	481.74011	4	1		2	Testis
77	ASTEI05237	N-terminal protein extension	scaffold00029:1318643-1340476	scaffold00029:1,315,683-1,377,949	RPSDSDYSK	scaffold00029:-:1343140-1343166	Yes	no		KB664467:+:183853-183879	-	2.84	1054.48345	3.26	527.74536	2	0		1	Testis
78	ASTEI03681	N-terminal protein extension	scaffold00016:1504813-1521613	scaffold00016:1487663-1523458	TDGTESPIITESDADTDKPR	scaffold00016:+:1504753-1504812	Yes	protein extension	ASTE006056	KB664323 :289034 -289093	129.0	5.2	2147.99736	1.57	1074.50232	2	0		6	Midgut
79	ASTEI03532	N-terminal protein extension	scaffold00015:1269345-1272847	scaffold00015:1269313-1273911	scASVLTSK	scaffold00015:1273451-1273477	Yes	Annotated	ASTE000307	KB664732 :1381728 -1381754	53.0	-	994.48857	1.17	497.74792	2	0	N-Term(Acetyl); C2(Carbamidomethyl)	3	Brain; Midgut
80	ASTEI05604	N-terminal protein extension	scaffold00032:807915-809272	scaffold00032:784590-810172	GPPPSSLAAQATGR	scaffold00032:+:807328-807369	Yes	Annotated	ASTE011019	KB664312:+:71551-71592	66.0	2.94	1309.70317	13.14	655.35522	2	0		3	Testis
81	ASTEI07497	N-terminal protein extension	scaffold00055:226236-226838	scaffold00055:223,434-227,094	TQPETIPScITTEPVQLVDFLLNLR	scaffold00055:-:226863-226937	Yes	Annotated	ASTE006983	NA	57.0	2.37	2884.50931	-1.14	962.17462	3	0	C9(Carbamidomethyl)	2	Ovary; Testis
82	ASTEI08169	N-terminal protein extension	scaffold00062:1080414-1082121	scaffold00062:1082556-1076056	IGDFGLATAK	scaffold00062:-:1079882-1079911	Yes	protein extension	ASTE003663		63.0	3.49	992.54143	0.25	496.77435	2	0		2	Brain; Midgut
					LNTLIDIAR	scaffold00062:-:1080011-1080037					71.0	3.4	1028.61406	4.02	514.81067	2	0		2	Brain
					IGSGSFGTVYK	scaffold00062:-:1080266-1080298					90.0	2.64	1115.57341	0.20	558.29034	2	0		2	Brain
83	ASTEI08029	N-terminal protein extension	scaffold00061:528443-529141	scaffold0061:528045-529400	IEDDDDGFR	scaffold00061:+:528206-528232	Yes	Annotated	ASTE006028		58.0	2.61	1081.44060	-2.52	541.22394	2	0		1	Ovary
84	ASTEI08400	N-terminal protein extension	scaffold00067:278981-279579	scaffold00067:277942-279579	DcVWNPYTSLTK	scaffold00067:+:278101-278136	no	Annotated	ASTE014937		-	3.24	1483.68877	0.09	742.34802	2	0	C2(Carbamidomethyl)	1	Midgut
					cNIcQSSVSNScR	scaffold00067:+:278305-278343					53.0	3.14	1571.63555	-0.27	786.32141	2	0	C1(Carbamidomethyl); C4(Carbamidomethyl); C12(Carbamidomethyl)	2	Midgut
					cDSSQSSVEcAVcSR	scaffold00067:+:278482-278526					108.0	4.84	1731.67327	0.06	866.34027	2	0	C1(Carbamidomethyl); C1(Carbamidomethyl); C13(Carbamidomethyl)	1	Midgut
					WNcNTATVR	scaffold00067:+:278527-278553					58.0	2.37	1121.51506	-0.56	561.26117	2	0	C3(Carbamidomethyl)	3	Midgut
					STLScVQcDSR	scaffold00067:+:278800-278832					77.0	3.37	1312.56108	-0.74	656.78418	2	0	C5(Carbamidomethyl); C8(Carbamidomethyl)	4	Midgut
					TDADGSLQR	scaffold00067:+:278923-278949					53.0	2.64	962.45305	-0.79	481.73016	2	0		1	Midgut
					tDADGSLQR	scaffold00067:+:278923-278949					53.0	2.64	962.45305	-0.79	481.73016	2	0		1	Midgut
85	ASTEI08543	N-terminal protein extension	scaffold00070:720741-724505	scaffold00070:716573-746672	LLHAATEEKPK	scaffold00070:-:746561-746593	Yes	protein extension	ASTE003906		42.0	4.1	1236.69449	-0.19	412.90302	3	0		6	Brain
					EEmYLQAQR	scaffold00070:-:746627-746653					47.0	1.73	1183.54180	0.46	592.27454	2	0	M3(Oxidation)	1	Brain
86	ASTEI08565	N-terminal protein extension	scaffold00071:227483-231399	scaffold00071:222146-231719	VEVKPSVAEK	scaffold00071:+:225929-225958	Yes	Annotated	ASTE001891		75.0	3.21	1085.61931	-0.78	543.31329	2	0		4	Male accessory glands
					TLEQLEASPAAQAPAGDGTPAQTPEEIR	scaffold00071:+:226145-226228					99.0	4.2	2848.39336	-0.95	1424.70032	2	0		3	Male accessory glands
					TLEQLEASPAAQAPAGDGTPAQTPEEIRK	scaffold00071:+:226145-226231					64.0	5.31	2976.48868	-0.79	992.83441	3	1		1	Male accessory glands
					KIQIVESLLESLK	scaffold00071:+:226232-226270					112.0	6.2	1499.90788	2.33	750.45758	2	1		2	Legs; Salivary gland
					IQIVESLLESLK	scaffold00071:+:226235-226270					86.0	4.12	1371.80681	-1.90	686.40704	2	0		14	Legs; Male accessory glands; Ovary; Salivary gland
87	ASTEI09248	C-terminal protein extension	scaffold00086:483923-486670	scaffold00086:481664-491101	EALENLEDDQPIVAGGSYQK	scaffold00086:+:489371-489430	Yes	C-terminal protein extension	ASTE002606	KB664422:+:1130567-1130626	123.0	5.75	2176.04180	0.58	1088.52454	2	0		5	Testis; Midgut
88	ASTEI04562	N-terminal protein extension	scaffold00024:657193-660627	scaffold00024:653591-665311	IIQQPVPVVR	scaffold00024:661316-661345	Yes	protein extension	ASTE001988	KB664533 :1226141-1226112	-	3.14	1148.71453	-0.47	574.86090	2	0		1	Ovary
89	ASTEI04755	N-terminal protein extension	scaffold00025:1229819-1231365	scaffold00025:1170457-1233653	PSLGIScVR	scaffold00025:+:1221339-1221365	Yes	no	ASTE001988	KB665288:295687-295661	43.0	-	988.52733	2.89	494.76730	2	0	C7(Carbamidomethyl)	2	Antennae
90	ASTEI04762	C-terminal protein extension	scaffold00025:1363717-1371332	scaffold00025:1320685-1376498	ANQTSATVVYK	scaffold00025:1371620-1371652	Yes	novel exon	ASTE007751	KB665288:147894-147862	69.0	2.74	1181.61724	0.95	591.31226	2	0		1	Testis
91	ASTEI04691	C-terminal protein extension	scaffold00025:234769-236072	scaffold00025:+:215527-237259	GcWQELIAK	scaffold00025:+:236218-236244	Yes	C-terminal protein extension	ASTE000424	KB665343 :484092-484118	37.0	2.68	1104.55644	5.20	552.78186	2	0	C2(Carbamidomethyl)	2	Head; Maxillary palps
92	ASTEI04790	C-terminal protein extension	scaffold00026:107137-108180	scaffold00026:+:106841-189293	YDPGDILR	scaffold00026:+:113753-113776	Yes	Annotated (single mismatch)	ASTE010683	KB664632 :27318 -27295	41.0	1.59	948.47875	0.20	474.74301	2	0		1	Brain
93	ASTEI05033	N-terminal protein extension	scaffold00027:1588149-1592796	scaffold00027:1503965-1594800	NEINEMR	scaffold00027:+:1505408-1505428	Yes	protein extension	ASTE002192	-	32.0	-	905.41472	0.14	453.21100	2	0		1	Midgut
94	ASTEI04804	N-terminal protein extension	scaffold00026:327170-327819	scaffold00026:-:320894-334547	GLLADFFDR	scaffold00026:-:330178-330204	Yes	Annotated	ASTE004060	KB665065:1975099 -1975125	46.0	2.33	1053.54766	10.65	527.27747	2	0		2	Salivary gland
95	ASTEI04837	N-terminal protein extension	scaffold00026:549655-556364	scaffold00026:-:546273-571068	VEWVEIIEPR	scaffold00026:-:568456-568485	Yes	protein extension	ASTE004032	KB665065:1683314-1683343	67.0	2.3	1269.68242	-1.11	635.34485	2	0		2	Brain
96	ASTEI05093	C-terminal protein extension	scaffold00028:747921-755856	scaffold00028:-:745492-757573	NDDEDSPNKLYTLVTYVPVPTFKELQTENVESTED	scaffold00028:-:748073-748177				KB664434:110051-109947	21.0	4.74	4029.89353	-1.03	1343.96936	3	2		1	Whole mosquito
					nDDEDSPNk	scaffold00028:-:748151-748177				KB664434:110051-110025	65.0	3.65	1321.61211	0.80	661.30969	2	0	N-Term(iTRAQ4plex); K9(iTRAQ4plex)	1	Midgut
					LNKAIWHR	scaffold00028:-:748306-748329					42.0	3.18	1037.60007	-0.27	346.53821	3	1		3	Midgut
97	ASTEI05135	N-terminal protein extension	scaffold00028:1674256-1679724	scaffold00028:1673130-1679239	SIVTAPAVSAAIMEENYDTTHPK	scaffold00028:+:1673350-1673418	Yes	Annotated	ASTE007382	KB664499:1052671-1052739	43.0	5.13	2445.19974	1.24	815.73810	3	0		1	Midgut
					dRDSIGAVLESIGFDVR	scaffold00028:+:1673488-1673538				KB664499:1052809-1052859	38.0	2.75	1993.05356	3.20	665.02271	3	1	N-Term(iTRAQ4plex)	1	Midgut
					vFNNLDk	scaffold00028:+:1673539-1673559				KB664499:1052860-1052880	53.0	-	1137.65080	0.13	569.32904	2	0	N-Term(iTRAQ4plex); K7(iTRAQ4plex)	1	Midgut
					DLLDELDK	scaffold00028:+:1673563-1673586				KB664499:1052884-1052907	-	1.66	960.48546	-3.13	480.74637	2	0		1	Midgut
					EILQLLTAVSR	scaffold00028:+:1673989-1674021				KB664499:1053310-1053342	59.0	3.13	1242.74346	1.44	621.87537	2	0		4	Larvae; Midgut; Pupae
					VAYQYQSNVPDNLAMDAMK	scaffold00028:+:1674025-1674081		exon extension		KB664499:1053346-1053402	60.0	3.8	2157.98931	-2.38	1079.49829	2	0		1	Midgut
98	ASTEI06800	N-terminal protein extension	scaffold00044:726778-731574	scaffold00044:712414-733690	eLILTDkQIEEImR	scaffold00044:+:726796-726837	Yes	Annotated	ASTE008259	KB665066:+:432927-432968	122.0	6.22	1730.94402	4.75	865.97565	2	1		9	Thorax; Antennae; Malpighian tubules; Midgut
					eLILTDkQIEEIMR	scaffold00044:+:726796-726837				KB665066:+:432927-432968	122.0	6.22	1730.94402	4.75	865.97565	2	1		9	Thorax; Antennae; Malpighian tubules; Midgut
					ELILTDKQIEEIMR	scaffold00044:+:726796-726837				KB665066:+:432927-432968	122.0	6.22	1730.94402	4.75	865.97565	2	1		9	Thorax; Antennae; Malpighian tubules; Midgut
99	ASTEI09454	N-terminal protein extension	scaffold00093:22948-32399	scaffold00093:22944-32399	TVDIYEDISSPEVTNLNR	scaffold00093:+:22989-23042	Yes	Annotated	ASTE004382	KB664688:+:668433-668486	98.0	5.01	2065.00713	-0.66	1033.00720	2	0		6	Brain
100	ASTEI09511	N-terminal protein extension (coding UTR)	scaffold00095:317747-319010	scaffold00095:317415-319096	VPQDVLNR	scaffold00095:-:318899-318922	Yes	C-terminal protein extension	ASTE003825	KB664478:+:108286-108309	65.0	2.43	940.52123	0.13	470.76425	2	0		2	Testis; Fatbody
101	ASTEI09555	N-terminal protein extension	scaffold00096:478278-487655	scaffold00096:478278-488790	AMGVDDNYHR	scaffold00096:+:478283-478312	Yes	protein extension	ASTE004651	KB664554:-:257991-258020	-	3.22	1193.50046	0.01	398.50500	3	0	M2(Oxidation)	1	Brain
102	ASTEI08466	N-terminal protein extension	scaffold00068:761735-786243	scaffold00068:761785-786243	HTLGGDmLQYQAQTQPPNIQR	scaffold00068:+:761785-761847	Yes	protein extension	ASTE009234		50.0	5.74	2412.17997	3.07	804.73151	3	0	M7(Oxidation)	2	Brain
					HTLGGDMLQYQAQTQPPNIQR	scaffold00068:+:761785-761847					50.0	5.74	2412.17997	3.07	804.73151	3	0	M7(Oxidation)	2	Brain
103	ASTEI10835	C-terminal protein extension	scaffold00172:12526-13970	scaffold00172:12526-14383	NDVLEMLR	scaffold00172:+:14020-14043	Yes	protein extension	ASTE001599	KB664471:-:83088-83111	-	2.55	989.51195	3.48	495.25961	2	0		2	Testis
					KGGSYTPLR	scaffold00172:+:14074-14100				KB664471:-:83031-83057	53.0	3.42	978.53978	3.11	489.77353	2	1		2	Testis
					SEIVVNAEKDPHHAHASFANR	scaffold00172:+:14173-14235				KB664471:-:82896-82958	56.0	4.98	2329.14370	0.17	583.04138	4	1		5	Testis
104	ASTEI10862	C-terminal protein extension	scaffold00176:26892-31285	scaffold00176:26399-51051	lPNNVLSk	scaffold00176:+:46704-46727				KB664622:-:1156155-1156178	43.0	-	1172.72258	-1.34	586.86493	2	0	N-Term(iTRAQ4plex); K8(iTRAQ4plex)	1	Midgut
					LPNNVLSK	scaffold00176:+:46704-46727				KB664622:-:1156155-1156178	43.0	-	1172.72258	-1.34	586.86493	2	0	N-Term(iTRAQ4plex); K8(iTRAQ4plex)	1	Midgut
					LSDYDQDGFLDIEEFALAmHLINVK	scaffold00176:+:46737-46811				KB664622:-:1156071-1156145	90.0	10.56	2896.41281	1.84	966.14246	3	0		10	Thorax; Antennae; Legs; Male accessory glands; Maxillary palps; Midgut; Proboscis
					LSDYDQDGFLDIEEFALAMHLINVK	scaffold00176:+:46737-46811				KB664622:-:1156071-1156145	90.0	10.56	2896.41281	1.84	966.14246	3	0		10	Thorax; Antennae; Legs; Male accessory glands; Maxillary palps; Midgut; Proboscis
105	ASTEI07561	C-terminal protein extension	scaffold00056:28370-31893	scaffold00056:28370-32180	NSNYIELQGESYPGPGSVTTAPR	scaffold00056:+:31948-32016	Yes	protein extension	ASTE009339	KB664431:-:195789-195857	115.0	5.04	2437.20268	16.25	1219.10498	2	0		1	Testis
106	ASTEI07672	N-terminal protein extension	scaffold00057:391719-392245	scaffold00057:391187-392245	iDIVHQNIEWQR	scaffold00057:+:391643-391678	Yes	protein extension	ASTE006482	KB664288:+:3166284-3166319	12.0	3.2	1694.90549	-2.38	565.64001	3	0	N-Term(iTRAQ4plex)	1	Ovary; Malpighian tubules; Midgut; Fatbody
					IDIVHQNIEWQR	scaffold00057:+:391643-391678				KB664288:+:3166284-3166319	12.0	3.2	1694.90549	-2.38	565.64001	3	0	N-Term(iTRAQ4plex)	1	Ovary; Malpighian tubules; Midgut; Fatbody
					FVSFAHTK	scaffold00057:+:391688-391711				KB664288:+:3166329-3166352	33.0	1.6	936.49463	0.88	312.83640	3	0		1	Midgut
107	ASTEI10950	N-terminal protein extension	scaffold00198:23275-23928	scaffold00198:22369-24317	IAHAGcSAcGESDHSSDR	scaffold00198:+:22754-22807	Yes	protein extension	ASTEI14058	KB664510:-:351856-351909	71.0	4.72	1916.76040	-0.36	479.94556	4	0	C6(Carbamidomethyl); C9(Carbamidomethyl)	1	Ovary
108	ASTEI01830	C-terminal protein extension	scaffold00006:3195850-3210428	scaffold00006:-:3189555-3210428	TPLEQPSGSGPR	scaffold00006:-:3195796-3195831	Yes	Annotated	ASTE009729	KB664437:464279-464244	52.0	3.1	1225.61748	0.23	613.31238	2	0		1	Brain
109	ASTEI01723	N-terminal protein extension	scaffold00006:1426514-1430580	scaffold00006:+:1420778-1432213	ANSPTEMR	scaffold00006:+:1426496-1426519	Yes	N-terminal protein extension	ASTE006362	KB664288:1317924-1317901	41.0	2.37	905.41301	-1.74	453.21014	2	0		1	Testis
110	ASTEI01724	N-terminal protein extension	scaffold00006:1433116-1435650	scaffold00006:+:1432288-1435833	AEMSEFNTIAR	scaffold00006:+:1433110-1433142	Yes	Annotated	ASTE006361	KB664288:1311680-1311648	-	2.82	1268.59258	-1.15	634.79993	2	0		2	Fatbody
111	ASTEI11019	C-terminal protein extension	scaffold00249:11564-23060	scaffold00249:11564-23060	FDGFDWENAPKPK	scaffold00249:+:23128-23166	Yes	novel gene	-	KB664826:+:38421-38459	86.0	4.59	1550.73674	5.96	775.87201	2	0		3	Brain
112	ASTEI11212	N-terminal protein extension	scaffold00709:1668-2745	scaffold00709:1663-3653	GHIcGGSLITTNTVLTAAHcLVDSR	scaffold00709:+:1713-1787				KB664841:+:9302-9376	16.0	-	2653.32046	0.70	664.08557	4	0	C4(Carbamidomethyl); C2(Carbamidomethyl)	1	Midgut
113	ASTEI11037	N-terminal protein extensionand C-terminal protein extension	scaffold00282:14060-16367	scaffold00282:13741-17211	AEQSITNYK	scaffold00282:+:13976-14002	Yes	N-terminal protein extension	ASTE011795	KB664873:-:3500-3526	57.0	-	1053.52141	0.25	527.26434	2	0		1	Ovary
					VQAANVIVAR	scaffold00282:+:14033-14062				KB664873:-:3440-3469	76.0	3.26	1040.62114	-0.02	520.81421	2	0		2	Ovary
					MLNTSEFESGISPAR	scaffold00282:+:16493-16537				scaffold00282:+:16493-16537	78.0	3.1	1638.77898	-0.18	819.89313	2	0		1	Ovary
114	ASTEI11056	N-terminal protein extension	scaffold00295:189-2716	scaffold00295:72-3004	TLHGLHER	scaffold00295:+:216-239	Yes	Annotated	ASTE000690	KB664510:-:2572460-2572483	51.0	2.19	962.51758	0.95	321.51071	3	0		2	Testis; Haemolymph
115	ASTEI11192	N-terminal protein extension	scaffold00625:3358-5073	scaffold00625:1752-5135	DLLGAAETGSGK	scaffold00625:-:5095-5130	Yes	Annotated	ASTE010887	KB664500:-:122538-122573	58.0	2.99	1118.56914	0.25	559.78821	2	0		4	Fatbody; Midgut; Ovary
116	ASTEI08778	N-terminal protein extension	scaffold00075:605357-613055	scaffold00075:604817-613055	GEPTDDQPFVSKGDK	scaffold00075:604817-604861				KB664475:-:337485-337529	78.0	4.25	1619.75469	-0.10	810.38098	2	1		3	Brain
117	ASTEI08943	N-terminal protein extension	scaffold00079:583526-587861	scaffold00079:582350-589426	AERPVLSGQR	scaffold00079:589374-589403	Yes	Annotated	ASTE009011	KB665132:+:112098-112127	53.0	3.42	1112.61687	-0.24	556.81207	2	0		8	Brain; Testis; Head; Haemolymph; Ovary
118	ASTEI11599	N-terminal protein extension	scaffold06271:474-596	scaffold06271:474-668	DAPNLLcTPHAAFYSEAATTELR	scaffold06271:-:600-668				-	52.0	4.73	2548.21433	0.22	850.07629	3	0	C7(Carbamidomethyl)	4	Malpighian tubules; Midgut; Ovary
119	ASTEI07385	N-terminal protein extension	scaffold00053:1186006-1194450	scaffold00053:1,177,190-1,194,715	VSPEELEQR	scaffold00053:+:1177731-1177757	Yes	protein extension	ASTE007556	KB664430:-:462287-462313	41.0	2.11	1086.54314	0.47	543.77521	2	0		5	Brain; Testis; Midgut; Salivary gland
120	ASTEI09857	N-terminal protein extension	scaffold00105:307869-308713	scaffold00105:303984-310362	TRLQNQQVGPNGEK	scaffold00105:+:307059-307100				KB664453:+:381749-381790	81.0	5.19	1568.81243	-1.01	784.90985	2	1		13	Midgut
121	ASTEI09956	C-terminal protein extension	scaffold00107:413634-419347	scaffold00107:413250-420283	NDVFYLQPER	scaffold00107:-:413504-413533	Yes	protein extension	ASTE005739	KB664710:-:558338-558367	63.0	3.15	1280.62627	-0.59	640.81677	2	0		4	Brain; Fatbody; Ovary; Salivary gland
122	ASTEI09926	N-terminal protein extension	scaffold00107:136332-144668	scaffold00107:125466-146226	AMALYEQHELIR	scaffold00107:+:135431-135466	Yes	protein extension	ASTE005711	KB664710:+:279937-279972	48.0	5.22	1617.85251	-0.91	539.95569	3	0	N-Term(iTRAQ4plex)	1	Midgut
					aMALYEQHELIR	scaffold00107:+:135431-135466				KB664710:+:279937-279972	48.0	5.22	1617.85251	-0.91	539.95569	3	0	N-Term(iTRAQ4plex)	1	Midgut
					EGLYGFDPLNEPLR	scaffold00107:+:135473-135514				KB664710:+:279979-280020	85.0	3.26	1619.80449	-1.22	810.40588	2	0		4	Brain; Male accessory glands; Salivary gland
					EGLYGFDPLNEPLRAELETGK	scaffold00107:+:135473-135535				KB664710:+:279979-280041	33.0	3.78	2348.17948	1.06	783.39801	3	1		1	Male accessory glands
123	ASTEI06882	C-terminal protein extension	scaffold00045:935322-938897	scaffold00045:935322-943091	LDALLELIDGATNAER	scaffold00045:+:938955-939002	Yes	protein extension	ASTE007517	KB664414:-:338716-338763	53.0	3.29	1713.91301	6.51	857.46014	2	0		2	Brain
124	ASTEI03411	C-terminal protein extension	scaffold00014:2047225-2056643	scaffold00014:2043425-2056643	IGHVGGSAEPTLEVR	scaffold00014:-:2043636-2043680	Yes	protein extension	ASTE001812	-	63.0	4.0	1521.81864	10.89	507.94440	3	0		4	Testis
					FGYLHDGScIVAGR	scaffold00014:-:2043681-2043722				KB664592:-:47653-47694	75.0	5.01	1551.74065	2.13	776.37396	2	0	C9(Carbamidomethyl)	4	Testis
					LAAVTSSTQK	scaffold00014:-:2043756-2043785				KB664592:-:47728-47757	63.0	3.34	1005.56218	4.61	503.28473	2	0		3	Testis
					HLVPIIVPK	scaffold00014:-:2043786-2043812				KB664592:-:47758-47784	45.0	-	1015.66606	-0.24	508.33667	2	0		1	Testis
					TSAIILPWGK	scaffold00014:-:2043918-2043947				KB664592:-:47890-47919	54.0	3.04	1085.64055	4.73	543.32391	2	0		5	Testis
					IQDYLIHANGTQLEAQLSNR	scaffold00014:-:2044011-2044070				KB664592:-:47983-48042	90.0	8.54	2284.17606	3.48	762.06354	3	0		4	Testis
					SLHLFVGSLK	scaffold00014:-:2044290-2044319				KB664592:-:48262-48291	50.0	4.54	1100.65825	10.86	550.83276	2	0		5	Testis
					IDREENSTTEQR	scaffold00014:-:2044410-2044445				KB664592:-:48382-48417	51.0	5.45	1477.69031	1.70	493.23495	3	1		3	Testis
					IVHGYITcR	scaffold00014:-:2044488-2044514				KB664592:-:48460-48486	51.0	3.28	1118.56601	-10.32	373.52686	3	0	C8(Carbamidomethyl)	3	Testis
					YVTNFDQLQQR	scaffold00014:-:2044569-2044601				KB664592:-:48541-48573	81.0	3.6	1411.70183	3.78	706.35455	2	0		7	Testis
					ITLTGDGSFENQcFDEVK	scaffold00014:-:2044602-2044655				KB664592:-:48574-48627	96.0	5.66	2059.92143	-3.09	1030.46436	2	0	C13(Carbamidomethyl)	1	Testis
					VQFAPDGSDLVQALEQQR	scaffold00014:-:2044656-2044709				KB664592:-:48628-48681	146.0	6.1	2001.00847	2.39	1001.00787	2	0		17	Testis; Male accessory glands
					cGATFLHIEcGLYTSR	scaffold00014:-:2044827-2044874				KB664592:-:48799-48846	65.0	4.65	1884.87163	-0.82	942.93945	2	0	C1(Carbamidomethyl); C1(Carbamidomethyl)	1	Testis
					DVIMGDILLGALR	scaffold00014:-:2044875-2044913				KB664592:-:48847-48885	42.0	2.32	1401.78313	4.30	701.39520	2	0	M4(Oxidation)	1	Testis
					DVImGDILLGALR	scaffold00014:-:2044875-2044913				KB664592:-:48847-48885	42.0	2.32	1401.78313	4.30	701.39520	2	0	M4(Oxidation)	1	Testis
125	ASTEI09627	N-terminal protein extension	scaffold00098:302492-303496	scaffold00098:301068-303888	SGSNDPIPGSPMKDDQAFVFDR	scaffold00098:-:303464-303529	Yes	Annotated	ASTE005048	KB664777:-:397636-397701	56.0	4.04	2380.08634	-0.50	794.03363	3	1		2	Midgut; Salivary gland
					SGSNDPIPGSPMK	scaffold00098:-:303491-303529				KB664777:-:397663-397701	-	1.93	1286.60539	0.62	643.80634	2	0		1	Brain
126	ASTEI10429	N-terminal protein extension	scaffold00130:284252-284824	scaffold00130:282777-284821	KDSSSSSFTPSINK	scaffold00130:+:282876-282917	partial	Annotated	ASTE002677	KB664464:+:411052 -411093	104.0	5.34	1484.72234	-0.30	742.86481	2	1		2	Brain; Fatbody
					DSSSSSFTPSINK	scaffold00130:+:282879-282917				KB664464:+:411055-411093	61.0	3.43	1356.62566	-1.59	678.81647	2	0		4	Testis; Midgut; Brain
					YGFVEVETPTLFR	scaffold00130:+:283386-283424				KB664464:+:411562-411600	61.0	3.84	1557.81755	14.59	779.41241	2	0		2	Brain; Testis
					KPGHFYSLVQSPQQFK	scaffold00130:+:283535-283582				KB664464:+: 411711-411758	38.0	1.63	1890.98618	0.01	631.00024	3	0		1	Brain
					MTLAEAMER	scaffold00130:+:283796-283822				KB664464:+:411972-411998	39.0	2.88	1051.49187	0.68	526.24957	2	0		2	Brain; Fatbody
					FGSDKPDTR	scaffold00130:+:283823-283849				KB664464:+:411999-412025	44.0	3.46	1022.48845	-1.71	511.74786	2	0		2	Testis
					RLTLQPDDLLLLGWGK	scaffold00130:+:284120-284167				KB664464:+:412296-412343	70.0	5.3	1838.04929	-2.31	613.35461	3	1		1	Brain
					lTLQPDDLLLLGWGk	scaffold00130:+:284123-284167				KB664464:+:339965-339994	75.0	4.19	1970.14678	-4.96	985.57703	2	0	N-Term(iTRAQ4plex); K15(iTRAQ4plex)	1	Ovary; Malpighian tubules; Midgut; Fatbody
					LTLQPDDLLLLGWGK	scaffold00130:+:284123-284167				KB664464:+:339965-339994	75.0	4.19	1970.14678	-4.96	985.57703	2	0	N-Term(iTRAQ4plex); K15(iTRAQ4plex)	1	Ovary; Malpighian tubules; Midgut; Fatbody
127	ASTEI10369	N-terminal protein extension	scaffold00127:295834-296423	scaffold00127:294027-297903	aNmAVSR	scaffold00127:+:294898-294918	Yes	Annotated	ASTE011343	KB664725:-:24518-24538	51.0	-	806.38365	1.35	403.69547	2	0	N-Term(Acetyl); M3(Oxidation)	1	Midgut
					LEmVNDNFTELR	scaffold00127:+:295828-295863				KB664725:-:23574-23609	97.0	3.84	1496.71733	8.21	748.86230	2	0	M3(Oxidation)	3	Legs; Ovary; Proboscis
					LEMVNDNFTELR	scaffold00127:+:295828-295863				KB664725:-:23574-23609	97.0	3.84	1496.71733	8.21	748.86230	2	0	M3(Oxidation)	3	Legs; Ovary; Proboscis
128	ASTEI10361	C-terminal protein extension	scaffold00127:101268-108961	scaffold00127:98984-109802	FLNETGDSYR	scaffold00127:-:99000-99029	Yes	joining of genes	ASTE006108; ASTE014702	KB664442:-:412847-412876	74.0	3.26	1201.54961	0.98	601.27844	2	0		6	Testis
129	ASTEI06801	N-terminal protein extension	scaffold00044:735128-739522	scaffold00044:734150-740520	LGWGWQESSGGGASGGGK	scaffold00044:+:735040-735093	Yes	Annotated	ASTE008260	KB665066:+:441166-441219	-	2.04	1677.75847	-1.91	839.38287	2	0		1	Salivary gland
130	ASTEI09025	C-terminal protein extension	scaffold00080:739198-746312	scaffold00080:716710-748609	QQALSFVAAAAAAAAVAAATAAETAVAAATATAR	scaffold00080:747938-748039	TCONS_00024981; TCONS_00024982	Gene correction	ASTE000127		-	3.69	3029.59311	-2.81	1010.53589	3	0		1	Testis
131	ASTEI093046	C-terminal protein extension	scaffold00088:578420-579001	scaffold00088:577590-579001	YEIcLPDVR	scaffold00088:578233-578259	Yes	protein extension	ASTE014792		65.0	2.73	1164.56914	-2.30	582.78821	2	0	C4(Carbamidomethyl)	2	Male accessory glands
					KYEIcLPDVR	scaffold00088:578233-578262					69.0	3.85	1292.66411	-2.07	646.83569	2	1	C5(Carbamidomethyl)	7	Male accessory glands
132	ASTEI08753	N-terminal protein extension	scaffold00074:474366-480572	scaffold00074:438079-497393	TPTGGFPVGSPFYAGTGTK	scaffold00074:-:486697-486753	Yes	Annotated	ASTE009857		73.0	4.91	1841.90593	-0.54	921.45660	2	0		2	Ovary
					TIGAVATQVHDSASTVAAAISASASSPVQTHPR	scaffold00074:-:486754-486852					89.0	4.89	3188.63051	0.29	797.91309	4	0		1	Ovary
133	ASTEI08226	C-terminal protein extension	scaffold00063:745409-765115	scaffold00063:743964-806119	DSVLNPSQDYIQASSQHTIR	scaffold00063:-:744018-744077	Yes	exon extension	ASTE002767		61.0	5.03	2259.09848	-0.71	753.70435	3	0		3	Brain
134	ASTEI07866	C-terminal protein extension	scaffold00059:557188-562391	scaffold00059:556448-562391	IYRPPLDEFSASSNK	scaffold00059:-:557101-557145	Yes	protein extension	ASTE003707		54.0	6.21	1723.87589	6.29	575.29681	3	0		1	Brain
135	ASTEI06954	C-terminal protein extension	scaffold00046:892924-894392	scaffold00046:892616-896336	THRPDYTDEQLEDIVDSVMR	scaffold00046:+:895296-895355	Yes	protein extension	ASTE002822	KB664488:+:76296-76355	78.0	5.44	2419.11875	-0.32	807.04443	3	0		2	Midgut
					THRPDYTDEQLEDIVDSVmR	scaffold00046:+:895296-895355				KB664488:+:76296-76355	78.0	5.44	2419.11875	-0.32	807.04443	3	0		2	Midgut
					MmDLNNDGFVDYSEYR	scaffold00046:+:895356-895403				scaffold00046:+:895356-895403	128.0	-	1984.80644	0.61	992.90686	2	0	M2(Oxidation)	1	Midgut
					MMDLNNDGFVDYSEYR	scaffold00046:+:895356-895403				scaffold00046:+:895356-895403	128.0	-	1984.80644	0.61	992.90686	2	0	M2(Oxidation)	1	Midgut
					mMDLNNDGFVDYSEYR	scaffold00046:+:895356-895403				scaffold00046:+:895356-895403	128.0	-	1984.80644	0.61	992.90686	2	0	M2(Oxidation)	1	Midgut
					DHDGFITYTEYR	scaffold00046:+:896201-896236				KB664488:+:77200-77235	69.0	3.51	1516.66850	-1.20	758.83789	2	0		1	Male accessory glands
136	ASTEI10002	C-terminal protein extension	scaffold00108:367589-377556	scaffold00108:367589-379372	INAERAPEDIFADVEK	scaffold00108:+:378755-378802				KB664519:-:155392-155439	67.0	6.29	1816.90874	0.59	908.95801	2	1		5	Antennae; Legs; Proboscis
					APEDIFADVEK	scaffold00108:+:378770-378802				KB664519:-:155392-155424	82.0	4.32	1233.59819	-1.33	617.30273	2	0		68	Brain; Malpighian tubules; Salivary gland; Testis; Antennae; Fatbody; Head; Legs; Male accessory glands; Maxillary palps; Midgut; Ovary; Proboscis
					aPEDIFADVEk	scaffold00108:+:378770-378802				KB664519:-:155392-155424	82.0	4.32	1233.59819	-1.33	617.30273	2	0		68	Brain; Malpighian tubules; Salivary gland; Testis; Antennae; Fatbody; Head; Legs; Male accessory glands; Maxillary palps; Midgut; Ovary; Proboscis
137	ASTEI10074	N-terminal protein extension	scaffold00111:292984-294826	scaffold00111:281267-329553	TAFDLLDRDQDGHVTPEELQFMLR	scaffold00111:-:306840-306911				KB664510:-:161318-161389	-	5.46	2862.39035	6.12	954.80164	3	1	M22(Oxidation)	1	Legs
					sQNFINLSEIR	scaffold00111:-:327372-327404				KB664510:-:181551-181583	60.0	-	1362.70012	-0.83	681.85370	2	0	N-Term(Acetyl)	1	Brain
					TGSGLIDETEFLQWVAR	scaffold00111:-:294779-294826
					TGSGLIDETEFLQWVAR	scaffold00111:-:306776-306778
138	ASTEI10144	C-terminal protein extension	scaffold00114:290821-317398	scaffold00114:285778-317398	GDMYDEQDVLEWLR	scaffold00114:-:287551-287592	Yes	novel exons	ASTE001047	KB664799:-:115706-115747	103.0	4.46	1768.79387	5.15	884.90057	2	0		6	Legs; Male accessory glands
					GDmYDEQDVLEWLR	scaffold00114:-:287551-287592				KB664799:-:115706-115747	103.0	4.46	1768.79387	5.15	884.90057	2	0		6	Legs; Male accessory glands
					VMNWLTSQDVFEIKNEIEEVNRK	scaffold00114:-:287913-287981				KB664799:-:116077-116145	24.0	8.59	2837.43252	6.54	710.11359	4	2	M2(Oxidation)	3	Legs
					NEIEEVNR	scaffold00114:-:287916-287939				KB664799:-:116080-116103	51.0	2.37	1002.48387	-1.23	501.74557	2	0		1	Male accessory glands
					VMNWLTSQDVFEIK	scaffold00114:-:287940-287981				KB664799:-:116104-116145	65.0	4.11	1709.85759	0.46	855.43243	2	0		5	Legs; Male accessory glands
					YGVTTIPSLVYYRK	scaffold00114:-:288027-288068				KB664799:-:116191-116232	56.0	3.76	1659.91294	1.47	553.97583	3	1		1	Male accessory glands
					YGVTTIPSLVYYR	scaffold00114:-:288030-288068				KB664799:-:116194-116232	76.0	4.89	1531.81975	2.75	766.41351	2	0		24	Thorax; Fatbody; Head; Legs; Male accessory glands; Maxillary palps; Proboscis
					ELADEIEEVNER	scaffold00114:-:288315-288350				KB664799:-:116479-116514	85.0	3.06	1445.67327	-1.56	723.34027	2	0		3	Whole mosquito; Male accessory glands; Midgut
					eLADEIEEVNER	scaffold00114:-:288315-288350				KB664799:-:116479-116514	85.0	3.06	1445.67327	-1.56	723.34027	2	0		3	Whole mosquito; Male accessory glands; Midgut
					IQDPQLAK	scaffold00114:-:288795-288818				KB664799:-:116988-117011	37.0	2.48	912.51586	0.99	456.76157	2	0		2	Testis; Midgut
139	ASTEI08107	N-terminal protein extension	scaffold00062:407519-410771	scaffold00062:404211-431464	YDPTIEDFYR	scaffold00062:-:425062-425091	Yes	protein extension	ASTE003591	KB664444:-:257601-257630	63.0	3.14	1318.58208	-9.83	659.79468	2	0		10	Brain; Testis; Antennae; Fatbody; Malpighian tubules; Ovary; Salivary gland
					SALTVQFVSGCFIEK	scaffold00062:-:425092-425136				KB664444:-:257631-257675
					EIEVDNSPCVLEILDTAGTEQFASMR	scaffold00062:-:410701-410771
					EIEVDNSPCVLEILDTAGTEQFASMR	scaffold00062:-:425050-425056
140	ASTEI10045	C-terminal protein extension	scaffold00110:369651-371463	scaffold00110:369651-376719	LPDGNDFYAFR	scaffold00110:+:374981-375013	partial	novel exon	ASTE010341	KB664433:+:221576-221608	65.0	3.53	1314.60869	-2.05	657.80798	2	0		3	Testis
					TASAQQLAELcDR	scaffold00110:+:375748-375786				KB664433:+:222343-222381	80.0	3.46	1462.72453	19.83	731.86591	2	0	C11(Carbamidomethyl)	1	Testis
141	ASTEI10124	N-terminal protein extension	scaffold00113:77570-81991	scaffold00113:77570-90117	sHcDNNWNVK	scaffold00113:-:90024-90053	Yes	protein extension	ASTE006122	KB664546:-:16998-17027	64.0	-	1315.55083	1.81	658.27905	2	0	N-Term(Acetyl); C3(Carbamidomethyl)	2	Brain; Testis
142	ASTEI09253	N-terminal protein extension	scaffold00086:511125-514377	scaffold00086:511125-514760	SGSVSccGSIVGDR	scaffold00086:514557-514598	no	protein extension	ASTE002612	na	100.0	4.26	1440.62322	1.78	720.81525	2	0	C6(Carbamidomethyl); C7(Carbamidomethyl)	1	Male accessory glands
143	ASTEI04383	C-terminal protein extension	scaffold00022:2078907-2079156	scaffold00022:2078702-2079546	HGITGAIYK	scaffold00022:2078907-2079156	Yes	protein extension	ASTE002223	KB664541:4049-4075	37.0	3.68	959.53313	2.30	480.27020	2	0		1	Testis
144	ASTEI01807	N-terminal protein extension	scaffold00006:2953586-2954461	scaffold00006:2953388-2954640	mDNIFHQTDETFYETQYSR	scaffold00006:+:2953454-2953510	Yes	Annotated (exonic)	ASTE009700	KB664437:+:205023-205079
145	ASTEI00498	N-terminal protein extension	scaffold00002:2426908-2433177	scaffold00002:2426677-2443449	YNVAVTK	scaffold00002:-:2441486-2441506	Yes	Annotated	ASTE000481	KB664580:+:163584-163604	52.0	-	794.44213	1.79	397.72470	2	0		1	Testis
					LEVPGVYDR	scaffold00002:-:2441540-2441566				KB664580:+:163524-163550	60.0	2.07	1047.54692	-0.06	524.27710	2	0		2	Brain; Testis
					IHELQSELDNVR	scaffold00002:-:2441648-2441683				KB664580:+:163407-163442	52.0	2.34	1452.74687	1.85	726.87708	2	0		3	Brain; Testis
					IKAELSQDVGTSK	scaffold00002:-:2441690-2441728				KB664580:+:163362-163400	68.0	2.47	1375.74773	3.58	688.37750	2	1		1	Antennae
					YLIHLDSVNR	scaffold00002:-:2441897-2441926				KB664580:+:163164-163193	28.0	1.32	1229.66434	0.50	410.55963	3	0		1	Brain
					DLVQEYDRLK	scaffold00002:-:2441954-2441983				KB664580:+:163107-163136	11.0	-	1278.67583	5.43	639.84155	2	1		1	Brain
					QQELNIIEK	scaffold00002:-:2442329-2442355				KB664580:+:162735-162761	32.0	2.5	1114.60979	-0.47	557.80853	2	0		2	Midgut; Testis
					TALFEEISGSGLLK	scaffold00002:-:2442596-2442637				KB664580:+:162453-162494	77.0	1.96	1464.79900	3.06	732.90314	2	0		2	Testis; Salivary gland
					SVINASSEYR	scaffold00002:-:2442773-2442802				KB664580:+:162288-162317	60.0	2.7	1125.55242	-0.97	563.27985	2	0		2	Brain; Midgut
146	ASTEI05467	N-terminal protein extension	scaffold00031:537925-541829	scaffold00031:529516-542709	tDVAHELGALR	scaffold00031:+:530828-530860	Yes	N-terminal protein extension	ASTE011504	KB665299:-:606868-606900	62.0	-	1223.64104	2.54	612.32416	2	0	N-Term(Acetyl)	5	Legs; Male accessory glands
147	ASTEI05767	N-terminal protein extension	scaffold00033:1070327-1071591	scaffold00033:1068721-1072692	tSATGEVFIVSAAR	scaffold00033:-:1072192-1072233	Yes	Annotated	ASTE004170	KB664943:+:679150-679191
					TPIGNFMGTLASLSAADLGAVAVK	scaffold00033:-:1071538-1071599				-	143	9.07	2304.23	-0.25	1152.62	2	0		13	Thorax; Legs; Male accessory glands; Malpighian tubules; Ovary; Proboscis
					TPIGNFMGTLASLSAADLGAVAVK	scaffold00033:-:1072182-1072191				KB664943:679783-679783	143	9.07	2304.23	-0.25	1152.62	2	0		13	Thorax; Legs; Male accessory glands; Malpighian tubules; Ovary; Proboscis
148	ASTEI01516	N-terminal protein extension	scaffold00005:3303791-3304733	scaffold00005:3303473-3305091	mQQNNQLQQPDDPQR	scaffold00005:+:3303660-3303704	Yes	Annotated	ASTE001776	KB664599:-:988181-988225
					NALNYQFSPEELR	scaffold00005:+:3303705-3303713				-	95	4.8	1580.77	-0.44	790.888	2	0		38	Thorax; Brain; Testis; Antennae; FatBody; Malpighian tubules; Midgut; Ovary; Proboscis; Salivary glands; MAxillary palps
					NALNYQFSPEELR	scaffold00005:+:3303791-3303820				-	95	4.8	1580.77	-0.44	790.888	2	0		38	Thorax; Brain; Testis; Antennae; FatBody; Malpighian tubules; Midgut; Ovary; Proboscis; Salivary glands; MAxillary palps
149	ASTEI01219	N-terminal protein extension	scaffold00004:4365564-4368582	scaffold00004:4362909-4371363	TAVASYmR	scaffold00004:+:4365546-4365569	Yes	Annotated	ASTE007468	KB665310:+:380257-380280	51.0	1.96	914.44255	2.72	457.72491	2	0	M7(Oxidation)	2	Testis; Salivary gland
					TAVASYMR	scaffold00004:+:4365546-4365569				KB665310:+:380257-380280	51.0	1.96	914.44255	2.72	457.72491	2	0	M7(Oxidation)	2	Testis; Salivary gland
					aKPAQLLNIDPANELK	scaffold00004:+:4363817-4363864				KB665310:+:378545-378592	93.0	-	1776.98624	0.41	888.99676	2	0	N-Term(Acetyl)	16	Legs
150	ASTEI00491	N-terminal protein extension	scaffold00002:2285955-2288507	scaffold00002:2282265-2288518	mEIAQAVSNAFWSTK	scaffold00002:+:2282824-2282868	Yes	Annotated	ASTE003549	KB664623:-:101421-101465	59.0	-	1740.84220	9.17	870.92474	2	0	N-Term(Acetyl); M1(Oxidation)	1	Legs
151	ASTEI05800	N-terminal protein extension	scaffold00033:1757588-1759375	scaffold00033:1757587-1820986	AVSETPGPLTR	scaffold00033:-:1813678-1813710	Yes	protein extension	ASTE006497		43.0	1.97	1127.60369	-1.67	564.30548	2	0	0	1	Antennae
					TQQTIDGAIASGDR	scaffold00033:-:1813783-1813824					85.0	3.67	1432.70464	1.33	716.85596	2	0	0	2	Testis
					ELLVTVDPETGK	scaffold00033:-:1813825-1813860				-	51.0	2.19	1300.70036	0.63	650.85382	2	0	0	1	Testis
					QGDCNVIQGNVAK	scaffold00033:-:1759664-1759702				KB664651:+:63769-63807	81.0	3.94	1402.67693	1.80	701.84210	2	0	C4(Carbamidomethyl)	1	Testis
152	ASTEI02704	C-terminal protein extension	scaffold00010:3408090-3416121	scaffold00010:3408102-3427201	DmISLSDAPSTSR	scaffold00010:+:3422127-3422165	Partial	protein extension	ASTE007833	KB665021:+:577400-577438	63.0	2.45	1395.64495	2.03	698.32611	2	0	M2(Oxidation)	2	Brain
					DMISLSDAPSTSR	scaffold00010:+:3422127-3422165				KB665021:+:577400-577438	63.0	2.45	1395.64495	2.03	698.32611	2	0	M2(Oxidation)	2	Brain
153	ASTEI10225	C-terminal protein extension	scaffold00119:170011-186875	scaffold00119:170011-203884	IQEmAAPGGDILSK	scaffold00119:+:198016-198057	Partial	protein extension	ASTE005347	KB664523:-:230831-230872	55.0	3.74	1445.72734	-2.22	723.36731	2	0	M4(Oxidation)	1	Brain
					IQEMAAPGGDILSK	scaffold00119:+:198016-198057				KB664523:-:230831-230872	55.0	3.74	1445.72734	-2.22	723.36731	2	0	M4(Oxidation)	1	Brain
					EIYPGSMHQQGYR	scaffold00119:+:182786-182815				-	59	2.73	1581.71	-1.94	791.358	2	0	M7(Oxidation)	1	Brain
					EIYPGSMHQQGYR	scaffold00119:+:185021-185029				-	59	2.73	1581.71	-1.94	791.358	2	0	M7(Oxidation)	2	Brain
154	ASTEI06859	N-terminal protein extension	scaffold00045:470345-493391	scaffold00045:402626-493931	HQVVAYTEK	scaffold00045:+:402634-402660	no	protein extension	ASTE008227	KB664545:-:287687-287713	40.0	3.57	1074.55815	0.27	537.78271	2	0	0	1	Brain
					VQVEDGALLPR	scaffold00045:+:402730-402762				KB664545:-:287585-287617	82.0	2.18	1196.66313	-0.25	598.83521	2	0	0	2	Brain
155	ASTEI09515	C-terminal protein extension	scaffold00096:2777-8213	scaffold00096:2776-9799	QTTESIQQMTAVER	scaffold00096:+:8345-8386	Yes	novel exon	ASTE007063	KB664481:-:152535-152576	112.0	4.86	1621.78826	1.96	811.39777	2	0	0	4	Testis; Midgut
					VVQYTEITPETDPPK	scaffold00096:+:8387-8431				KB664481:-:152490-152534	73.0	3.84	1716.86589	-1.88	858.93658	2	0	0	2	Testis; Fatbody
					ISIIPQDPVLFSATIR	scaffold00096:+:8693-8740				KB664481:-:152181-152228	71.0	2.74	1770.01726	0.67	885.51227	2	0	0	2	Pupae
					YNLDPFNLYDDDmLWR	scaffold00096:+:8741-8788				KB664481:-:152133-152180	65.0	4.63	2105.94023	6.10	1053.47375	2	0	M13(Oxidation)	1	Testis
					FKHcTVLTVAHR	scaffold00096:+:9075-9110				KB664481:-:151811-151846	40.0	4.08	1468.80507	14.20	367.95673	4	1	C4(Carbamidomethyl)	1	Testis
					ILVMDAGEAR	scaffold00096:+:9138-9167				KB664481:-:151754-151783	41.0	1.88	1074.56133	0.04	537.78430	2	0	0	2	Midgut; Testis
156	ASTEI08929	N-terminal protein extension	scaffold00079:197218-207065	scaffold00079:165765-207065	ANDTAAAPAGSPSSK	scaffold00079:+:184020-184064	Yes	protein extension	ASTE009024	KB665132:-:636878-636922	89.0	4.74	1344.63970	0.46	672.82349	2	0	0	31	Brain; Testis; Head; Midgut; Ovary; Antennae

## Sheet: Table S5.5_Alternate frame
Supplemental Table S5.5 - A summary of results from proteogenomics analysis
Proteins translated in alternate frame
Prasad et al., 2016. Integrating transcriptomic and proteomic data for accurate assembly and annotation of genomes
	Gene symbol	Peptide sequence		Genomic coordinates of identified peptide (Indian)	Category	Exon involved	Revised cooridantes of the exon	Whether revised translation annotated in SDA-500	Genomic coordinates of identified peptide (according to SDA500)	Gene involved (in SDA500)	Mascot score	Sequest score	MH+ [Da]	Delta M (ppm)	m/z [Da]	Charge	Modifications	no. PSMs	Tissues
1	ASTEI04349	GGIDESEQFFDLK	GGIDESEQFFDLK	scaffold00022:-:1085120-1085158	Insertion of T between 1085090 and 1085091	Exon 1 and 2	scaffold00022:1085090-1086205	Yes	-		93	3.75	1484.69	-1.21	742.848	2		6	Fatbody; Male accessory glands; Midgut; Ovary
		gGIDESEQFFDLk	GGIDESEQFFDLK	scaffold00022:-:1085120-1085158					-		44	3.32	1772.89	-0.24	591.636	3	N-Term(iTRAQ4plex); K13(iTRAQ4plex)	1	Midgut
2	ASTEI03784	GENSYGIDIFcK	GENSYGIDIFCK	scaffold00017:1024997-1025032	Insertion of G between scaffold00017:1025031-1025032	Exon 7 and 8	scaffold00017:1024763-1025787	Yes	KB664555:-:323420-323455	ASTE010750	79	2.84	1402.63	1.91	701.82	2	C11(Carbamidomethyl)	3	Midgut; Ovary
3	ASTEI05717	VLIQRAEALTK	VLIQRAEALTK	scaffold00033:+:458470-458502					KB664631:-:102929-102961	ASTE009766	38	-	1241.76	-0.04	621.382	2		1	Malpighian tubules
		TKGGIVIPEKAQSK	TKGGIVIPEKAQSK	scaffold00033:+:458503-458544					KB664631:-:102887-102928	ASTE009766	46	4.71	1455.85	-1.87	485.955	3		6	Midgut; Malpighian tubules
		GGIVIPEKAQSK	GGIVIPEKAQSK	scaffold00033:+:458509-458544					KB664631:-:102887-102922	ASTE009766	38	2.78	1226.71	-0.07	409.575	3		6	Midgut
		VLLPEYGGTKVELGDSK	VLLPEYGGTKVELGDSK	scaffold00033:+:458638-458688					KB664631:-:102743-102793	ASTE009766	112	5	1804.97	-0.69	902.988	2		18	Thorax; Antennae; Midgut; Proboscis; Malpighian tubules; Maxillary palps; Ovary
		vLLPEYGGTkVELGDSk	VLLPEYGGTKVELGDSK	scaffold00033:+:458638-458688					KB664631:-:102743-102793	ASTE009766	34	4	2237.28	0.67	746.43	3	N-Term(iTRAQ4plex); K10(iTRAQ4plex); K17(iTRAQ4plex)	2	Midgut
		vELGDSkEYHLFR	VELGDSKEYHLFR	scaffold00033:+:458668-458706					KB664631:-:102725-102763	ASTE009766	19	2.92	1881.01	0.51	627.675	3	N-Term(iTRAQ4plex); K7(iTRAQ4plex)	3	Midgut
		VELGDSKEYHLFR	VELGDSKEYHLFR	scaffold00033:+:458668-458706					KB664631:-:102725-102763	ASTE009766	125	5.15	1592.81	-0.22	796.907	2		20	Thorax; Antennae; Brain; Fatbody; Legs; Malpighian tubules; Maxillary palps; Midgut; Ovary; Testis
		eADILAk	EADILAK	scaffold00033:+:458707-458727					-		-	3.1	1047.63	0.08	524.318	2	N-Term(iTRAQ4plex); K7(iTRAQ4plex)	1	Midgut
		EADILAK	EADILAK	scaffold00033:+:458707-458727					-		70	2.02	759.425	0.23	380.216	2		7	Testis; Midgut; Ovary
4	ASTEI07552	DYSTLFK	DYSTLFK	scaffold00055:+:1146649-1146669	insertion of G between 1,146,624 and 1,146,625	Exon 1 and 2	scaffold00055:1145524-1146751	Yes	-		44	-	873.435	-0.34	437.221	2		1	Ovary
5	ASTEI06745	eETPAAVPAETVGDVEGEPk	EETPAAVPAETVGDVEGEPK	scaffold00043:+:1293865-1293924	Exon split after peptide	Exon 2	scaffold00043:1293866-1293924	Yes	KB664766:-:274366-274425	ASTE006676	81	5.27	2313.17	0.57	1157.09	2	N-Term(iTRAQ4plex); K20(iTRAQ4plex)	5	Midgut
		EETPAAVPAETVGDVEGEPK	EETPAAVPAETVGDVEGEPK	scaffold00043:+:1293865-1293924		Exon 3			KB664766:-:274366-274425	ASTE006676	79	5.03	2024.97	0.72	1012.99	2		10	Whole mosquito; Midgut
6	ASTEI03464	QPVAEQSSEKPATDR	QPVAEQSSEKPATDR	scaffold00015:-:2879-2923		Exon 6	scaffold00015:1-19903	Translation in alternate frame	KB664732:+:2677067-2677117	ASTE000372	-	4.61	1944.11	1.23	486.782	4		1	Brain
									KB664732:+:2677022-2677066	ASTE000372	25	-	1642.8	-0.33	548.272	3		1	Brain
7	ASTEI04988	TAASSAVAATASVNAHGFASSDR	TAASSAVAATASVNAHGFASSDR	scaffold00027:+:467556-467624	joining of exons : Deletion of C in scaffold00027:467,475	Exon 1 and 2	scaffold00027:467288-468208	Yes	-	ASTE009603	69	8.62	2149.03	1.48	717.015	3		1	Midgut
		cEQSATASVPR	CEQSATASVPR	scaffold00027:+:467670-467702					-	ASTE009603	55	3.1	1205.56	-1.06	603.282	2	C1(Carbamidomethyl)	1	Midgut
8	ASTEI04773; ASTEI04774	IKPQQPAPVKPQQQQTK	IKPQQPAPVKPQQQQTK	scaffold00025:-:1799164-1799193	joining of genes: deletion of T at scaffold00025:1,799,238				KB665254:-:317479-317508	ASTE002945	67	4.17	1146.59	-2.42	573.797	2		4	Testis; Midgut; Ovary
9	ASTEI04563	FVSVGTNTDREDWK	FVSVGTNTDREDWK	scaffold00024:+:665772-665813	-	Exon 4	scaffold00024:665761-666132	Translation in alternate frame (ASTE04563)	KB664533:+:1230592-1230633	ASTE001989	53	3.37	1653.8	5.53	827.402	2		1	Ovary
		VILDNQLDQFIK	VILDNQLDQFIK	scaffold00024:+:665862-665897					KB664533:+:1230682-1230717	ASTE001989	73	2.67	1445.8	2.65	723.406	2		3	Testis; Ovary
10	ASTEI05129	STTDSTGAGATKPSGDGQK	STTDSTGAGATKPSGDGQK	scaffold00028:+:1627149-1627205		Exon 2	scaffold00028:1626984-1627329	Yes	KB664499:+:996415-996471	ASTE007376	136	5.58	1765.82	-0.12	883.414	2		4	Testis; Ovary
11	ASTEI08960	KLLISTLIR	KLLISTLIR	scaffold00079:671685-671711		Exon 10	Scaffold00079:671,631-671,731	protein extension of ASTE008996	KB665132:+:26039-26065	ASTE008996	47	3.79	1056.71	-0.07	528.861	2		2	Thorax
12	ASTEI09235	ENGQLGLIAAcAAGGQGVAmLLER	ENGQLGLIAACAAGGQGVAMLLER	scaffold00085:+:707040-707111		Exon 5	Scaffold00085:707,022-707,135	Yes	KB664513:+:337797-337868	ASTE004684	112	9.98	2415.21	0.78	1208.11	2	C11(Carbamidomethyl); M20(Oxidation)	3	Head; Testis
		ENGQLGLIAAcAAGGQGVAMLLER	ENGQLGLIAACAAGGQGVAMLLER	scaffold00085:+:707040-707111					KB664513:+:337797-337868	ASTE004684	127	8.45	2399.24	8.23	1200.12	2	C11(Carbamidomethyl)	16	Antennae; Fatbody; Head; Malpighian tubules; Ovary; Pupae; Testis
		ENGQLGLIAAcAAGGQGVAmLLERHPEANAE	ENGQLGLIAACAAGGQGVAMLLERHPEANAE	scaffold00085:+:707040-707132					KB664513:+:337797-337889	ASTE004684	41	5.24	3163.52	-0.96	1055.18	3	C11(Carbamidomethyl); M20(Oxidation)	1	Midgut
		ENGQLGLIAAcAAGGQGVAMLLERHPEANAE	ENGQLGLIAACAAGGQGVAMLLERHPEANAE	scaffold00085:+:707040-707132					KB664513:+:337797-337889	ASTE004684	61	7.08	3147.53	-0.64	1049.85	3	C11(Carbamidomethyl)	3	Antennae; Midgut
13	ASTEI11228	VAMLPHTGYVYYcDIVQDTPPDLR	VAMLPHTGYVYYCDIVQDTPPDLR	scaffold00798:-:540-611		Exon 4	scaffold00798:259-621	Yes	KB664511:+:1132904-1132975	ASTE002512	38	2.61	2823.36	3.99	941.791	3	C13(Carbamidomethyl)	1	Ovary
14	ASTEI03368	qITDVMTELAk	QITDVMTELAK	scaffold00014:-:1477434-1477466					KB664548:-:41784-41816	ASTE003130	81	4.72	1536.86	1.86	768.932	2	N-Term(iTRAQ4plex); K11(iTRAQ4plex)	2	Midgut; Ovary; Malpighian tubules; Fatbody
		QITDVmTELAK	QITDVMTELAK	scaffold00014:-:1477434-1477466					KB664548:-:41784-41816	ASTE003130	68	-	1264.65	0.42	632.827	2	M6(Oxidation)	2	Malpighian tubules; Ovary
		QITDVMTELAK	QITDVMTELAK	scaffold00014:-:1477434-1477466					KB664548:-:41784-41816	ASTE003130	80	3.41	1248.65	2.21	624.83	2		10	Testis; Fatbody; Midgut; Pupae; Ovary
15	ASTEI09788	EVPQPPESGDASK	EVPQPPESGDASK	scaffold00103:+:317765-317803					KB664367:-:286187-286225		47	2.45	1340.63	-0.05	670.82	2		2	Brain; Testis
16	ASTEI09973	lLLDPAPIISHSAk	LLLDPAPIISHSAK	scaffold00107:-:481965-482006		Exon 7	scaffold00107:481932-482437	Yes	KB664710:-:626851-626892	ASTE005756	79	7.49	1763.05	-7.55	588.356	3	N-Term(iTRAQ4plex); K14(iTRAQ4plex)	4	Ovary; Malpighian tubules; Midgut; Fatbody
		LLLDPAPIISHSAK	LLLDPAPIISHSAK	scaffold00107:-:481965-482006					KB664710:-:626851-626892	ASTE005756	78	4.65	1474.87	2.31	492.294	3		11	Brain; Testis; Fatbody; Ovary; Salivary gland

## Sheet: Table S5.6_Joining of genes
Supplemental Table S5.6 - A summary of results from proteogenomics analysis
Joining of genes
Prasad et al., 2016. Integrating transcriptomic and proteomic data for accurate assembly and annotation of genomes
	Genes involved (in Indian)	Revised genomic coordinates of transcript (Indian)	Peptide sequence	Genomic coordinates of identified peptide (Indian)	Transcript evidence (Yes/no)	Category of gene correction (in SDA500)	Gene involved (in SDA500)	Genomic coordinates of identified peptide (SDA500)	Mascot score	Sequest score	MH+1	Mass error (Da)	m/z	Charge	Modification(s)	PSMs	Tissues detected
1	ASTEI07668; ASTEI07669; ASTEI07670	scaffold00057:377454-386808	IEQMFKDYGLDTWFNPAR	scaffold00057:+:378125-378155	Yes	novel exon	ASTE006480-PA	-	88	5.94	2247.06	4.88	1124.04	2	M4(Oxidation)	2	Brain
				scaffold00057:+:378769-378791	Yes			-
			DYGLDTWFNPAR	scaffold00057:+:378143-378155	Yes			-	92	3.47	1454.67	0.09	727.839	2	0	28	Brain; Testis; Antennae; Head; Male accessory glands; Proboscis; Salivary glands
				scaffold00057:+:378769-378791	Yes			-
			aANAFADILVLEASDFTK	scaffold00057:+:379912-379965	Yes			KB664288:+:3154568-3154621	120.0	-	1937.98820	1.35	969.49774	2	N-Term(Acetyl)	35	Legs
			EYLDmDLTLSQEK	scaffold00057:+:381039-381077	Yes			KB664288:+:3155695-3155733	70.0	3.83	1600.73992	-0.77	800.87360	2	M5(Oxidation)	10	Brain; Legs; Proboscis; Salivary gland
			EYLDMDLTLSQEK	scaffold00057:+:381039-381077	Yes			KB664288:+:3155695-3155733	70.0	3.83	1600.73992	-0.77	800.87360	2	M5(Oxidation)	10	Brain; Legs; Proboscis; Salivary gland
			eYLDmDLTLSQEk	scaffold00057:+:381039-381077	Yes			KB664288:+:3155695-3155733	70.0	3.83	1600.73992	-0.77	800.87360	2	M5(Oxidation)	10	Brain; Legs; Proboscis; Salivary gland
			vQQLATFAVAHVNALLTGLR	scaffold00057:+:381078-381137	Yes			KB664288:+:3155734-3155793	157.0	7.86	2122.21782	2.16	1061.61255	2	0	173	Thorax; Brain; Testis; Antennae; Fatbody; Head; Larvae; Legs; Male accessory glands; Malpighian tubules; Maxillary palps; Midgut; Ovary; Proboscis; Salivary gland
			LFLVEDLVDSIK	scaffold00057:+:381141-381176	Yes			KB664288:+:3155797-3155832	88.0	3.81	1390.78508	1.58	695.89618	2	0	19	Thorax; Brain; Testis; Antennae; Head; Legs; Malpighian tubules; Maxillary palps; Proboscis; Salivary gland
			lFLVEDLVDSIk	scaffold00057:+:381141-381176	Yes			KB664288:+:3155797-3155832	88.0	3.81	1390.78508	1.58	695.89618	2	0	19	Thorax; Brain; Testis; Antennae; Head; Legs; Malpighian tubules; Maxillary palps; Proboscis; Salivary gland
			QSIDTHIEIVR	scaffold00057:+:381379-381411	Yes			KB664288:+:3156035-3156067	95.0	4.48	1310.70244	-2.98	655.85486	2	0	70	Thorax; Brain; Testis; Antennae; Head; Larvae; Legs; Male accessory glands; Malpighian tubules; Midgut; Proboscis; Salivary gland; Maxillary palps
			qSIDTHIEIVR	scaffold00057:+:381379-381411	Yes			KB664288:+:3156035-3156067	95.0	4.48	1310.70244	-2.98	655.85486	2	0	70	Thorax; Brain; Testis; Antennae; Head; Larvae; Legs; Male accessory glands; Malpighian tubules; Midgut; Proboscis; Salivary gland; Maxillary palps
				scaffold00057:+:381534-381540	Yes			-
			IQEITEK	scaffold00057:+:381418-381438	Yes			KB664288:+:3156074-3156094	43.0	2.42	860.47215	-0.30	430.73972	2	0	4	Brain; Maxillary palps; Thorax; Legs
			iQEITEk	scaffold00057:+:381418-381438	Yes			KB664288:+:3156074-3156094	43.0	2.42	860.47215	-0.30	430.73972	2	0	4	Brain; Maxillary palps; Thorax; Legs
				scaffold00057:+:384486-384515	Yes			-
2	ASTEI02290; ASTEI02291	scaffold00009:31164-49459	ENQLANQGSVDR	scaffold00009:-:34163-34198	Yes	Annotated	EXON of transcript ASTE004563RA;CDS of transcript ASTE004563RA		62.0	3.49	1330.63298	-1.25	665.82013	2	0	1	Brain
3	ASTEI06309; ASTEI06310	scaffold00039:244687-250200; scaffold00039:250280-251780	ISEIEIGNImER	scaffold00039:250253-250288	Yes	Annotated	ASTE004825	KB664610:+:163759-163794	53	4	1419.72	3.1	710.363	2	M10(Oxidation)	4	Testis; Ovary; Salivary gland
4	ASTEI06795; ASTEI06796	scaffold00044:690755-697283; scaffold00044:697608-698564	NQMILPDDKNPK	scaffold00044:699234-699269	Yes	Annotated	ASTE008255	KB665066:+:402159-402194	51	2.88	1412.72	1.18	706.865	2		1	Midgut
		scaffold00044:690755-697283; scaffold00044:697608-698564	RPGYGDDTDDER	scaffold00044:698937-698972	Yes	Annotated	ASTE008255	KB665066:+:401862-401897	87	4.04	1395.58	-0.08	698.292	2		2	Testis; Male accessory glands
		scaffold00044:690755-697283; scaffold00044:697608-698564	GGEmNATTGGSKPQQQAQNAAAQAK	scaffold00044:698991-699065	Yes	Annotated	ASTE008255	-	74	4.46	2460.16	2.57	820.725	3	M4(Oxidation)	1	Testis
		scaffold00044:690755-697283; scaffold00044:697608-698564	WVNTDEGEAEAEAYKPPPK	scaffold00044:699364-699420	Yes	Annotated	ASTE008255	KB665066:+:402298-402354	79	4.84	2131.04	19.23	711.018	3		3	Testis; Male accessory glands; Salivary gland
5	ASTEI08010; ASTEI08011; ASTEI08012	scaffold00061:48545-98201	NccILALNWR	scaffold00061:-:97882-97911	Yes	not annotated	novel	KB664710:-:759725-759754	-	2.8	1319.65	10.11	660.328	2	C2(Carbamidomethyl); C3(Carbamidomethyl)	1	Salivary gland
6	ASTEI10631; ASTEI10632	scaffold00144:139,400-209,008	DLFPPIATVQDGIR	scaffold00144:-:142694-142735	Yes	joining of genes	ASTE002479; ASTE002480	KB664511:+:778437-778478	85	-	1541.83	0.17	771.42	2		3	Brain
			LTKEDIEK	scaffold00144:-:143263-143286				KB664511:+:777886-777909	46	3.03	975.536	0.44	488.272	2		2	Head
			LQLSEMAK	scaffold00144:-:154165-154188				KB664511:+:768547-768570	42	2.09	919.491	-1.03	460.249	2		3	Brain; Midgut
			AWLTIALGR	scaffold00144:-:176084-176110	no			-	40	-	1000.58	-14.3	500.793	2		1	Male accessory glands
7	ASTEI10980; ASTEI10981	scaffold00211:-:36062-47775	GGVIFVDQLPMTASGK	scaffold00211:-:44194-44241	Yes	annotated	ASTE009796-PA	KB664794:+:3560-3607	75	4.28	1619.84	-5.13	810.423	2		9	Midgut
			GGVIFVDQLPmTASGK	scaffold00211:-:44194-44241				KB664794:+:3560-3607	15	2.27	1635.85	2.65	818.426	2	M11(Oxidation)	1	Midgut
			ALTEQAVIDHcAR	scaffold00211:-:44284-44322				KB664794:+:3479-3517	69	3.89	1483.73	-2.57	742.368	2	C11(Carbamidomethyl)	5	Midgut
			cYNDLATALIVR	scaffold00211:-:44353-44388				KB664794:+:3413-3448	64	3.08	1408.73	1.06	704.867	2	C1(Carbamidomethyl)	1	Midgut
			FDSDGFLYLIDR	scaffold00211:-:44509-44544				KB664794:+:3257-3292	106	3.72	1460.71	4.22	730.86	2		11	Midgut
			AALENGTEGFVR	scaffold00211:-:44563-44598				KB664794:+:3203-3238	72	3.56	1263.63	-1.16	632.319	2		6	Fatbody; Midgut
8	ASTEI00796; ASTEI00797	scaffold00003:+:1745502-1758433	qGLVLGVYSSDGkDEVk	scaffold00003:+:1747331-1747381	Yes	protein extension	ASTE009375	KB664562:+:240843-240893	59	5.89	2226.23	-3.82	742.747	3	N-Term(iTRAQ4plex); K13(iTRAQ4plex); K17(iTRAQ4plex)	2	Ovary; Malpighian tubules; Midgut; Fatbody
			QGLVLGVYSSDGKDEVK	scaffold00003:+:1747331-1747381				KB664562:+:240843-240893	79	6.85	1793.97	22.78	897.488	2		15	Thorax; Larvae; Legs; Maxillary palps; Midgut; Ovary; Proboscis; Salivary gland; Malpighian tubules; Testis
9	ASTEI02769; ASTEI02770	scaffold00011:748,109-753,826	SVQEQYDTEANLTEcAR	scaffold00011:+:752892-752942	Yes		ASTEI001031	KB664721:+:977759-977809	118	4.84	2013.88	-0.61	1007.44	2	C15(Carbamidomethyl)	8	Testis; Male accessory glands; Midgut; Salivary gland; Ovary
	ASTEI03017; ASTEI03018	scaffold00012:1,960,779-1,970,928	DAANTERQDEETNEVK	scaffold00012:+:1967100-1967147	Yes	Annotated	ASTE008592	KB664621:-:55183-55230	-	3.15	1848.82	0.97	616.946	3		1	Testis
	ASTEI03149; ASTEI03150	scaffold00013:1,767,282-1,776,108	LAGEFFTEDLLTPFFR	scaffold00013:-:1770556-1770603	Yes	Annotated	ASTE006922	KB664843:-:2033707-2033754	75	3.64	1902.96	-2.53	951.983	2		3	Brain; Ovary
10	ASTEI01491; ASTEI01493	scaffold00005: 3017814-3022174; scaffold00005: 3031562-3040974	NSGEYFAIK	scaffold00005:3039643-3039669	Yes	novel gene	-	KB664599:-:1290789-1290815	41	1.76	1028.5	0.15	514.756	2		1	Salivary gland
			DEVESLLSEK	scaffold00005:3039700-3039729				KB664599:-:1290729-1290758	47	2.13	1148.57	-0.87	574.787	2		2	Ovary; Salivary gland
			IFEVANTMR	scaffold00005:3039733-3039759				KB664599:-:1290699-1290725	43	1.18	1080.55	1.7	540.78	2		1	Brain
			NIVWDDLLLR	scaffold00005:3040689-3040718				KB664599:-:1289740-1289769	64	2.47	1256.7	1.12	628.854	2		3	Salivary gland; Midgut; Pupae
			LDNLLLDTEGYVK	Scaffold00005:3040048 3040075; Scaffold00005: 3040160 3040170
			DLKLDNLLLDTEGYVK	Scaffold00005: 3040039-3040075; Scaffold00005: 3040160-3040170
11	ASTEI01643; ASTEI01644	scaffold00006:152223-156989	HIESTLSSFR	scaffold00006:154568-154597	Yes	Annotated	ASTE006445	KB664288:+:2596769-2596798	49	2.46	1176.6	0.06	588.804	2		2	Testis; Salivary gland
12	ASTEI01280; ASTEI01282	scaffold00005:418633-440972	YTVMSGTPQK	scaffold00005:418634-418663	Yes	Annotated	ASTE005812	-	56	2.22	1111.55	-0.04	556.276	2		2	Brain
13	ASTEI04127; ASTEI04128	scaffold00020:1853865-1867421	DAETNEIVAVK	scaffold00020:+:1854162-1854194	Yes	Annotated	ASTE005218-RA	KB664522:-:337722-337754	56	2.91	1188.6	-6.12	594.805	2		3	Testis; Midgut; Ovary
			LLHELQHENIIGLLDVFGHK	scaffold00020:+:1854264-1854323				KB664522:-:337593-337652	29	3.27	2325.28	1.64	582.074	4		1	Testis
			DLKPNNLLISGTGVLK	scaffold00020:+:1854480-1854527				KB664522:-:337389-337436	66	3.62	1682	9.51	841.504	2		1	Ovary
			iGDFGLAk	scaffold00020:+:1854528-1854551				KB664522:-:337365-337388	24	2.72	1108.66	-0.6	554.834	2	N-Term(iTRAQ4plex); K8(iTRAQ4plex)	1	Midgut
			IGDFGLAK	scaffold00020:+:1854528-1854551				KB664522:-:337365-337388	-	2.35	820.461	5.76	410.734	2		1	Ovary
			VPFLPGESDLDQLTR	scaffold00020:+:1854699-1854743				KB664522:-:337173-337217	111	3.48	1686.87	-2.61	843.936	2		4	Testis; Ovary
			IFQVLGTPNETNWPDVK	scaffold00020:+:1854744-1854794				KB664522:-:337122-337172	74	3.69	1958.02	6.98	979.511	2		1	Ovary
			DIFTAASEDLIELANK	scaffold00020:+:1854846-1854893				KB664522:-:337023-337070	94	3.88	1749.89	0.73	875.45	2		4	Ovary; Testis
14	ASTEI00787; ASTEI00788; ASTEI00789	scaffold00003:+:1704126-1712602	qTFYGHFVAGEDR	scaffold00003:+:1712307-1712345	Yes	Translation in alternate frame	ASTE09730	KB664562:+:180271-180309	51	5.03	1670.8	-1.95	557.605	3	N-Term(iTRAQ4plex)	3	Ovary; Malpighian tubules; Midgut; Fatbody
			QTFYGHFVAGEDR	scaffold00003:+:1712307-1712345				KB664562:+:180271-180309	89	4.69	1526.71	4	763.858	2		26	Thorax; Testis; Head; Male accessory glands; Malpighian tubules; Maxillary palps; Ovary; Salivary gland
15	ASTEI03886; ASTEI03887; ASTEI03888	scaffold00018:1,041,640-1,056,880	LTQLFENLSHDELR	scaffold00018:+:1042576-1042617	Yes	Annotated	ASTE004966	KB665354:+:227203-227244	20	3.65	1714.88	1.68	572.298	3		1	Midgut
			lTQLFENLSHDELR	scaffold00018:+:1042576-1042617				KB665354:+:227203-227244	56	4.29	1858.98	1.31	620.332	3	N-Term(iTRAQ4plex)	1	Midgut
16	ASTEI03474; ASTEI03475	scaffold00015:143959-149082	vSGGNATATEk	scaffold00015:-:147900-147932	Yes	Annotated	ASTE000362	KB664732:+:2521115-2521147	65	3.96	1322.72	0.03	661.861	2	N-Term(iTRAQ4plex); K11(iTRAQ4plex)	2	Midgut
17	ASTEI03791; ASTEI03792	scaffold00017:1130760 -1214745	VPPLKVEDLIQDLK	scaffold00017:1151952-1151993	Yes	Annotated	ASTE010741	KB664555:-:182661-182702	88	4.87	1606.94	-0.05	536.319	3		13	Testis; Legs; Midgut; Salivary gland
			SGDDLTYAEIVAGLR	scaffold00017:1186581-1186625				-	85	4.06	1579.8	1.55	790.403	2		3	Male accessory glands; Ovary; Salivary gland
			TVVQLTGANRPTVNEPIAR	scaffold00017:1186818-1186874				-	38	3.15	2036.12	-0.22	679.38	3		1	Ovary
			TSEYGASEPSDPTETVNYR	scaffold00017:1187592-1187648				-	101	4.78	2102.92	3.66	1051.96	2		1	Ovary
			NVSVVDLRPLEEPLTVTSIELK	scaffold00017:1188168-1188233				KB664555:-:146446-146511	29	4.14	2451.37	-0.01	817.795	3		2	Male accessory glands
			EVEESTVQQTETVSYHR	scaffold00017:1188420-1188470				-	60	5.92	2021.94	0.59	674.652	3		3	Proboscis; Maxillary palps
			GVNAEELVEQANTGHSAPLTDDR	scaffold00017:1190532-1190600				KB664555:-:143986-144054	116	6.23	2423.15	0.74	808.387	3		3	Male accessory glands; Salivary gland
			HADTVmTSATAK	scaffold00017:1190676-1190711				-	48	2.23	1248.59	2.92	624.8	2	M6(Oxidation)	1	Testis
			SDAANMAAFLEAER	scaffold00017:1190757-1190798				-	87	3.68	1495.68	-1.33	748.345	2		1	Male accessory glands
			DQTSPGmSSTITK	scaffold00017:1190856-1190894				-	66	2.98	1368.63	-0.03	684.819	2	M7(Oxidation)	1	Male accessory glands
			SNLVFEDYDFMQQSPVK	scaffold00017:1191063-1191113				-	73	3.33	2046.94	-1.79	1023.98	2		1	Male accessory glands
			fkPQLETIPSDADLLGk	scaffold00017:1191165-1191215				-	25	4.69	2304.32	0.35	768.778	3	N-Term(iTRAQ4plex); K2(iTRAQ4plex); K17(iTRAQ4plex)	1	Midgut
			ISMITHEEVLLQPVSHIK	scaffold00017:1191408-1191461				KB664555:-:143110-143163	36	4.39	2074.13	-1.11	692.05	3		3	Male accessory glands
			VEVPEVRPDVVPLEPIVQETPK	scaffold00017:1191501-1191566				KB664555:-:143005-143070	26	4.22	2469.36	-1.97	823.79	3		1	Male accessory glands
			LLVQVNIPHKAAEEQAALER	scaffold00017:1194608-1194667				KB664555:-:138073-138132	42	4.65	2229.21	-13.48	743.74	3		1	Midgut
			AAEEQAALER	scaffold00017:1194638-1194667				KB664555:-:138073-138102	83	3.27	1087.54	-1.8	544.272	2		4	Male accessory glands; Midgut; Ovary; Salivary gland
			EVTVTNVTETVKPK	scaffold00017:1194743-1194784				KB664555:-:137956-137997	72	3.96	1544.85	-2.06	772.929	2		4	Male accessory glands; Ovary
			SEPETPIPNVWEQMK	scaffold00017:1194785-1194829				-	38	1.19	1784.85	-0.47	892.929	2		1	Salivary gland
			TYAEVVAGQEAER	scaffold00017:1194839-1194877				-	79	3.04	1422.69	0.22	711.847	2		3	Male accessory glands; Midgut; Salivary gland
			LTPNQPEDAQSESIVESVVK	scaffold00017:1195700-1195759				KB664555:-:136990-137049	115	4.3	2170.08	-2.04	1085.55	2		5	Fatbody; Male accessory glands; Ovary; Salivary gland
			APAKEDVQPQVDDTSR	scaffold00017:1195823-1195870				KB664555:-:136879-136926	62	2.96	1755.84	-3.55	585.953	3		1	Salivary gland
			EDVQPQVDDTSR	scaffold00017:1195835-1195870				KB664555:-:136879-136914	67	2.84	1388.63	-0.66	694.818	2		2	Male accessory glands; Ovary
			EIEHLLDHHAHKPSPLVEQEDVAPVVHADDAHK	scaffold00017:1196165-1196263				-	-	3.76	3712.88	10.28	743.383	5		1	Male accessory glands
			VAEDTDVSER	scaffold00017:1197089-1197118				-	73	2.86	1120.51	-0.4	560.759	2		2	Male accessory glands; Salivary gland
			AQITDcDTETIVR	scaffold00017:1197413-1197451				-	101	3.11	1521.72	-0.76	761.364	2	C6(Carbamidomethyl)	1	Male accessory glands
			QATDQQEVGASENASR	scaffold00017:1212477-1212524		Extension of exon		KB664555:-:120242-120289	117	4.64	1690.76	0.85	845.886	2		1	Testis
18	ASTEI02658; ASTEI02659	scaffold00010:2565711-2833979	DTIVLDPTSSDIR	scaffold00010:+:2763792-2763830	Yes	not annotated	not annotated	-	56	2.28	1431.73	0.23	716.37	2		4	Brain; Fatbody; Midgut
			dTIVLDPTSSDIR	scaffold00010:+:2763792-2763830				-	44	4.35	1575.83	-5.07	788.417	2	N-Term(iTRAQ4plex)	1	Ovary; Malpighian tubules; Midgut; Fatbody
19	ASTEI03594; ASTEI03595	scaffold00015:2591865-2621653	FLWSYNAQSAPK	scaffold00015:+:2611124-2611159	Yes	Annotated	ASTE000929	KB664582:-:208954-208989	87	2.67	1411.7	0.15	706.354	2		2	Brain
			sASDSPASPTSVSSSVMSSSGGSR	scaffold00015:+:2611268-2611339			-	KB664582:-:208774-208845	45	5.77	2359.07	-2.39	787.03	3	N-Term(iTRAQ4plex)	1	Ovary; Malpighian tubules; Midgut; Fatbody
			HDSQEYAVPER	scaffold00015:2610883 - 2610903; scaffold00015: 2611106 - 2611117
20	ASTEI03558; ASTEI03559	scaffold00015:+:1683910-1709291	DIKPDNILLDEEGHAHLTDFNIATR	scaffold00015: 1695448 1695484;scaffold00015: 1705708 1705745	Yes	Annotated
21	ASTEI01999; ASTEI02000; ASTEI02001	scaffold00007:2836176-2900794	LMPGSTAQTNK	scaffold00007:+:2882306-2882338	Yes	joining of genes	ASTE003117 ASTE003118 ASTE003119	-	43	2.8	1147.58	0.04	574.292	2		5	Brain; Ovary
			LmPGSTAQTNK	scaffold00007:+:2882306-2882338				-	54	2.53	1163.57	-0.52	582.29	2	M2(Oxidation)	4	Brain; Ovary
			LHTFYLQQRPDNGDTWADIK	scaffold00007:+:2882339-2882398				-	13	4.22	2418.2	5.62	806.737	3		1	Brain
			VNHPLDFETIK	scaffold00007:+:2882399-2882431				-	-	2.17	1312.69	-0.29	656.848	2		1	Brain
			YEITSGNIGGAFAVK	scaffold00007:2982885-2982929				-	75	3.46	1526.79	1.49	763.897	2		1	Brain
22	ASTEI05285; ASTEI05286	scaffold00029:1,884,610-1,926,405	ELHNNLLESSMR	scaffold00029:+:1911699-1911734	Yes	Annotated	ASTE003340	-	33	3.12	1442.7	-0.91	721.856	2		1	Midgut
			SYSDDLVWK	scaffold00029:+:1912802-1912828				-	34	1.34	1112.53	-0.75	556.766	2		1	Midgut
			gLAAGLDHEIAENGENLSVGQR	scaffold00029:+:1912865-1912930				-	85	7.07	2394.21	-2.21	1197.61	2	N-Term(iTRAQ4plex)	2	Midgut
			GLAAGLEHPISENGENLSVGQR	scaffold00029:+:1918935-1919000				KB664412:+:480920-480985	104	7.31	2248.13	-1.14	1124.57	2		2	Midgut
			fLNSAELDPSNVTNHk	scaffold00029:+:1922773-1922820				-	54	5.65	2074.08	0.2	692.032	3	N-Term(iTRAQ4plex); K16(iTRAQ4plex)	1	Midgut
			FLNSAELDPSNVTNHK	scaffold00029:+:1922773-1922820			ASTE003341	-	75	4.28	1785.87	-1.73	893.44	2		6	Male accessory glands; Midgut
			iVEAAGGQIIIDGLDISk	scaffold00029:+:1925449-1925502				KB664412:+:489314-489367	91	5.4	2100.22	1.09	1050.61	2	N-Term(iTRAQ4plex); K18(iTRAQ4plex)	1	Midgut
			GLTAGLEHEIAENGENLSVGQR	scaffold00029:+:1925662-1925727				-	111	6.05	2294.13	-1.62	765.383	3		6	Male accessory glands; Testis
			gLTAGLEHEIAENGENLSVGQR	scaffold00029:+:1925662-1925727				-	52	4.95	2438.24	0.92	813.419	3	N-Term(iTRAQ4plex)	1	Midgut
			dSIFYSMAk	scaffold00029:+:1926049-1926075				-	40	3.64	1349.7	-0.75	675.354	2	N-Term(iTRAQ4plex); K9(iTRAQ4plex)	1	Midgut
23	ASTEI07878; ASTEI07879	scaffold00059:793864-798400	TcEcNLQNSQNR	scaffold00059:+:796525-796560	Yes	novel exon	ASTE003696	KB664444:-:1565085-1565120	56	3.63	1523.63	0.49	762.32	2	C2(Carbamidomethyl); C4(Carbamidomethyl)	2	Midgut
			TcEcNLQNSQNRR	scaffold00059:+:796525-796563				KB664444:-:1565082-1565120	31	1.9	1679.73	0.01	560.583	3	C2(Carbamidomethyl); C4(Carbamidomethyl)	1	Midgut
			ELFEQcVAPNAGDELR	scaffold00059:+:796564-796611				KB664444:-:1565034-1565081	103	4.49	1847.86	0.51	924.434	2	C6(Carbamidomethyl)	12	Testis; Malpighian tubules; Midgut; Pupae; Salivary gland
24	ASTEI05205; ASTEI05204	scaffold00029:689,752-708,873	LESHLAVESSSNSNYGSR	scaffold00029:+:706925-706978	Yes	joining of genes	ASTE002048,ASTE003049	KB664429:+:499237-499290	89	6.41	1936.9	-0.6	646.304	3		3	Brain
			FIMADGMSGEQSLAPRPHRPK	scaffold00029:667701- 667718
				scaffold00029:690411- 690455
			NSEFTGSSK	scaffold00029:+:667523-667549				KB664429:+:442848-442874	-	2.31	956.432	0.37	478.72	2		1	Brain
			NSEFTGSSKDQQIELDEYGK	scaffold00029:+:667523-667582				KB664429:+:442848-442907	70	5.67	2275.05	5.07	759.021	3		1	Brain
			DQQIELDEYGK	scaffold00029:+:667550-667582				KB664429:+:442875-442907	55	3.21	1337.63	5.75	669.318	2		6	Brain; Midgut; Ovary
25	ASTEI08078; ASTEI08079	scaffold00062:9102-28538	SIVmTNYEETIKmPINEPAK	scaffold00062:-:9721-9780	Yes	joining of genes	ASTE006094; ASTE006093	KB664442:+:227504-227563	21	3.56	2340.15	0.24	780.72	3	M4(Oxidation); M13(Oxidation)	1	Maxillary palps
			sIVMTNYEETIk	scaffold00062:-:9745-9780				KB664442:+:227504-227539	78	4.74	1715.91	0.67	858.461	2	N-Term(iTRAQ4plex); K12(iTRAQ4plex)	1	Ovary; Malpighian tubules; Midgut; Fatbody
26	ASTEI04708; ASTEI04709	scaffold00025:481863-495284	HEDNLKPEGAFTVPER	scaffold00025:-:490526-490573	Yes	Annotated	ASTE011126	-	76	4.94	1838.9	-2.65	919.953	2		4	Testis; Fatbody; Midgut
27	ASTEI04912; ASTEI04913	scaffold00026:1683635-1785777			Yes	novel gene	-									3	Brain; Testis
			SSNFVSMVER	scaffold00026:+:1767257-1767286				-	42	-	1155.55	3.36	578.279	2		1	Testis
28	ASTEI05024; ASTEI05025	scaffold00027:1186123-1196260	YSSLWSHK	scaffold00027:-:1191468-1191491	Yes	novel	-	KB665032:+:555830-555853	32	-	1007.49	-0.51	504.251	2		1	Brain
29	ASTEI09482; ASTEI09483	scaffold00093:523320-527377	LPQPVESNTSVESR	scaffold00093:-:524100-524141	Yes	novel exon	ASTE004408	KB664688:-:1215580-1215621	87	4.25	1542.78	4.53	771.895	2		4	Testis; Ovary; Salivary gland
			YFLAEGIVNK	scaffold00093:-:524264-524293				KB664688:-:1215744-1215773	68	2.56	1153.62	-1.01	577.316	2		3	Testis; Ovary
30	ASTEI05417; ASTEI05418	scaffold00030:1,961,502-1,985,715	VPVLGFSETAQSVFR	scaffold00030:-:1974167-1974211	Yes	novel exon	ASTE0010888	KB664500:+:140968-141012	102	4.37	1636.87	-1.33	818.937	2		4	Male accessory glands; Midgut; Salivary gland
31	ASTEI10819; ASTEI10821	scaffold00167:79503-88118	RLPGSQWNAPIK	scaffold00167:+:80328-80363	Yes	Annotated	ASTE002815	KB664734:+:58237-58272	42	-	1366.76	1.98	683.885	2		1	Salivary gland
32	ASTEI07063; ASTEI07064; ASTEI07062	scaffold00048:159476-208387	TNEPNGLIILNTMTR	scaffold00048:+:183004-183048	Yes	Annotated	ASTE005555-PA	-	73	3.93	1686.89	2.55	843.948	2		1	Brain
			NLLAGLTVLNDNNWHTVR	scaffold00048:+:184597-184650				-	144	6.26	2050.08	-0.77	1025.54	2		4	Brain
			LQVDGTQPVR	scaffold00048:+:184678-184707				KB664454:-:209023-209052	55	2.83	1112.61	1.96	556.808	2		4	Brain
			GDVQLVTGVLDR	scaffold00048:+:197194-197229				KB664454:-:196516-196551	63	3.84	1271.69	-0.75	636.351	2		6	Brain
			GDVQLVTGVLDRNDQR	scaffold00048:+:197194-197241				KB664454:-:196504-196551	27	3.01	1784.93	2.18	595.648	3		1	Brain
33	ASTEI10981; ASTEI10980	scaffold00211:36062-45969	GGVIFVDQLPMTASGK	scaffold00211:-:44194-44241	Yes	protein extension	ASTE009796	KB664794:+:3560-3607	75	4.28	1619.84	-5.13	810.423	2		9	Midgut
			GGVIFVDQLPmTASGK	scaffold00211:-:44194-44241				KB664794:+:3560-3607	15	2.27	1635.85	2.65	818.426	2	M11(Oxidation)	1	Midgut
			ALTEQAVIDHcAR	scaffold00211:-:44284-44322				KB664794:+:3479-3517	69	3.89	1483.73	-2.57	742.368	2	C11(Carbamidomethyl)	5	Midgut
			cYNDLATALIVR	scaffold00211:-:44353-44388				KB664794:+:3413-3448	64	3.08	1408.73	1.06	704.867	2	C1(Carbamidomethyl)	1	Midgut
			FDSDGFLYLIDR	scaffold00211:-:44509-44544				KB664794:+:3257-3292	106	3.72	1460.71	4.22	730.86	2		11	Midgut
			AALENGTEGFVR	scaffold00211:-:44563-44598				KB664794:+:3203-3238	72	3.56	1263.63	-1.16	632.319	2		6	Fatbody; Midgut
34	ASTEI01847; ASTEI01849	scaffold00006:-:3720014-3862080	NIITHDEYHR	scaffold00006:-:3745436-3745465	Yes	Annotated	ASTE007306	KB664417:+:580426-580455	40	3.15	1297.63	0.44	433.215	3		2	Brain
35	ASTEI05675; ASTEI05676	scaffold00032:1,900,680-1,905,750	TATTATVEPVVGDEPLLFSDVFDESLER	scaffold00032:+:1902251-1902334	Yes	Annotated	ASTE004940	KB664855:-:675578-675661	59	2.51	3037.48	-2.1	1013.17	3		1	Brain
			AGNDPFQDDHTFDLLR	scaffold00032:+:1903034-1903081				KB664855:-:674831-674878	37	5.27	1860.86	3.16	620.957	3		2	Brain
36	ASTEI03210; ASTEI03211 and ASTEI03212	scaffold00013:2762526-2781823	SQLETLLSETQK	scaffold00013:+:2776492-2776527	Yes	Annotated	ASTE009420	-	94	3.24	1376.73	0.22	688.867	2		6	Testis; Midgut
			sQLETLLSETQk	scaffold00013:+:2776492-2776527				-	41	-	1664.93	-0.65	555.648	3	N-Term(iTRAQ4plex); K12(iTRAQ4plex)	1	Midgut
			TEELNQETR	scaffold00013:+:2776564-2776590				-	69	2.76	1119.53	1.58	560.268	2		4	Testis; Midgut
			VLEQQIEQLNK	scaffold00013:+:2776738-2776770				-	73	2.99	1341.74	0.49	671.373	2		1	Midgut
			vLEQQIEQLNk	scaffold00013:+:2776738-2776770				-	65	3.99	1629.94	-0.96	815.474	2	N-Term(iTRAQ4plex); K11(iTRAQ4plex)	1	Midgut
37	ASTEI09874; ASTEI09875	scaffold00105:472711-480495	FTTRPGIEHEER	scaffold00105:+:476491-476526	Yes	Annotated	ASTE010617	-	36	4.59	1471.73	-0.32	368.688	4		2	Brain
			TDAADSGLMQER	scaffold00105:+:477004-477039				-	-	1.62	1293.57	-4.06	647.288	2		1	Brain
38	ASTEI10445; ASTEI10446; ASTEI10447; ASTEI10448	scaffold00132:89008-108104	SHIITHTSTPSSAPTK	scaffold00132:-:99105-99152	Yes	protein extension	ASTE003674-PA	-	71	6.8	1664.86	0.11	555.625	3		3	Brain
39	ASTEI08908; ASTEI08909; ASTEI08910	scaffold00078:615128-703912	TRDQWEIDR; KLGSGQFGDVWEGLWNNTTPVAIK	scaffold00078:700074-700100; scaffold00078:700122-700193	Yes	joining of genes	joining of ASTE000604 and ASTE000605	KB664510:-:923369-923440	90	6.92	2617.34	1.05	1309.18	2		9	Brain; Fatbody; Male accessory glands; Ovary; Proboscis; Salivary gland; Midgut
			DFLAEAQIMK	scaffold00078:700305-700338				KB664510:-:923227-923256	51	1.8	1165.59	0.92	583.3	2		3	Brain; Salivary gland
			LPQLIDMAAQIAAGMAYLESQNYIHR;NVLVGDNNIVK	scaffold00078:700542-700622;scaffold00078:700836-700665				KB664510:-:922895-922927	51	2.81	1184.66	-1.17	592.835	2		7	Brain; Testis; Antennae; Fatbody; Male accessory glands; Midgut; Salivary gland
			LIKEDEYEAR;WTAPEAANYSK	scaffold00078:700758-700789;scaffold00078:700811-700846				KB664510:-:922776-922805	68	3.68	1265.64	0.96	633.323	2		11	Brain; Testis; Antennae; Midgut; Salivary gland
			RPTFETLQWK;LEDFFTMDPSEYK	scaffold0078:701132-701162; -701163-701203				KB664510:-:922364-922402	83	3.13	1621.72	3.63	811.361	2		4	Brain; Fatbody; Salivary gland
40	ASTEI06992; ASTEI06993	scaffold00046:1247707-1310781	YcQDPDAEDAANIMR	scaffold00046:+:1281083-1281127	Yes	joining of genes	joining of ASTE002864-PA, ASTE002865-PA, ASTE002866-PA, ASTE014322-PA, ASTE014322-PB, ASTE002867-PA, ASTE014323-PA	KB664488:+:538460-538504	70	2.36	1768.72	-0.96	884.866	2	C2(Carbamidomethyl)	2	Brain
			SNVSmTGSNQmLNSTK	scaffold00046:+:1301605-1301652				KB664488:+:559028-559075	104	3.14	1730.77	-0.27	865.888	2	M5(Oxidation); M11(Oxidation)	2	Brain
			SNVSMTGSNQMLNSTK	scaffold00046:+:1301605-1301652				KB664488:+:559028-559075	76	2.3	1698.77	-2.38	849.891	2		1	Brain
41	ASTEI07030; ASTEI07031; ASTEI07032	scaffold00047:477005-608587	EScLVNLYPHPSTLSK	scaffold00047:+:558529-558576	Yes	joining of genes	ASTE010864 ASTE010866 ASTE010867 ASTE010865	-	56	4.22	1844.93	4.12	922.968	2	C3(Carbamidomethyl)	2	Fatbody
			SFTIIYETNEGLVR	scaffold00047:+:563109-563150				-	25	2.12	1641.85	2.75	821.43	2		1	Fatbody
			AHGLSDYPITVR	scaffold00047:+:563169-563204				-	45	2.44	1328.7	5.29	664.855	2		3	Brain; Fatbody
42	ASTEI10224; ASTEI10225	scaffold00119:112109-186904	ILAELEHPR	scaffold00119:+:162914-162940	Yes	joining of genes	ASTE005347 ASTE005348 ASTE005349	-	59	2.84	1077.6	-1.61	539.305	2		4	Brain
			ISEPIETLQSR	scaffold00119:+:154976-155008				-	63	3.37	1272.68	4.34	636.846	2		5	Brain
43	ASTEI10295; ASTEI10296; ASTEI10297	scaffold00123:85551-159047	GPEDLQYYVIQYKPK	scaffold00123:-:134533-134577	Yes	joining of genes	ASTE008397 ASTE008398 ASTE008399 ASTE008400 ASTE008401 ASTE008402 ASTE008403	KB664427:-:439321-439365	79	6.43	1840.95	2.69	614.323	3		2	Brain
			LEWSYKGPEDLQYYVIQYKPK	scaffold00123:-:134533-134595				KB664427:-:439321-439383	28	6.39	2647.35	2.51	662.593	4		1	Brain
			VIETGHTAVmQcK	scaffold00123:-:143245-143283				-	88	4.69	1489.71	0.47	745.361	2	M10(Oxidation); C12(Carbamidomethyl)	9	Brain
			VIETGHTAVMQcK	scaffold00123:-:143245-143283				-	96	4.76	1473.72	0.17	737.363	2	C12(Carbamidomethyl)	8	Brain
44	ASTEI10461; ASTEI10462; ASTEI10463	scaffold00132:238021-265870	TELTLHTAYDHK	scaffold00132:+:265318-265353	Yes	joining of genes	ASTE003694 ASTE003695	KB664444:+:1499635-1499670	53	3.95	1428.71	1.39	714.861	2		3	Brain
			IYAWYVAEYPFGNPVR	scaffold00132:+:265557-265604				KB664444:+:1499876-1499923	48	3.04	1944.96	0.03	972.986	2		1	Brain
45	ASTEI08831; ASTEI08832	scaffold00076:494888-504492	DLMVGDEASQLR	scaffold00076:498224-498259	Yes	protein extension	ASTE001152-PA	KB665176:-:1023400-1023435	87	4.56	1333.63	-6.1	667.32	2		13	Brain; Testis; Fatbody; Midgut; Ovary; Proboscis; Salivary gland
			dLmVGDEASQLR	scaffold00076:498224-498259				KB665176:-:1023400-1023435	65	3.55	1493.74	2.69	747.375	2	N-Term(iTRAQ4plex); M3(Oxidation)	1	Midgut
			DLmVGDEASQLR	scaffold00076:498224-498259				KB665176:-:1023400-1023435	74	3.63	1349.64	1.36	675.323	2	M3(Oxidation)	7	Malpighian tubules; Fatbody; Midgut; Ovary
46	ASTEI03024. ASTEI03025	scaffold00012:2012789-2091465	QSTVLSEQQLNAGFFLGF	scaffold00012:+:2087244-2087297	Yes	joining of genes	ASTE006520-PA, ASTE006520-PA	-	-	2.77	1986	0.12	662.671	3		1	Antennae
47	ASTEI10304; ASTEI10305	scaffold00124:63724-78143	HccGAGGGGPSVSVIGPSNLK	scaffold00124:-:77524-77586	Yes	novel gene	novel gene	-	106	5.31	2010.95	-0.17	1005.98	2	C2(Carbamidomethyl); C3(Carbamidomethyl)	3	Testis
			KHccGAGGGGPSVSVIGPSNLK	scaffold00124:-:77524-77589				-	57	6.08	2139.06	5.85	713.69	3	C3(Carbamidomethyl); C4(Carbamidomethyl)	2	Testis
			SQSNVSLGK	scaffold00124:-:77677-77703				-	-	3.19	919.485	0.52	460.246	2		1	Testis
			DKPDSDKEHEMILmK	scaffold00124:-:77776-77820				-	23	4.14	1831.86	0.85	611.291	3	M14(Oxidation)	2	Testis
			DKPDSDKEHEMILMK	scaffold00124:-:77776-77820				-	40	5.08	1815.87	2.53	605.96	3		1	Testis
			DKPDSDKEHEmILMK	scaffold00124:-:77776-77820				-	32	4.36	1831.86	1.15	611.291	3	M11(Oxidation)	2	Testis
			GcGcccSASR	scaffold00124:-:77920-77949				-	70	2.61	1174.39	1.01	587.697	2	C2(Carbamidomethyl); C4(Carbamidomethyl); C5(Carbamidomethyl); C6(Carbamidomethyl)	1	Testis
			LLQQLTADGQSGGSGmGR	scaffold00124:-:77950-78003				-	94	5.21	1791.87	2.13	896.438	2	M16(Oxidation)	9	Testis
			LLQQLTADGQSGGSGMGR	scaffold00124:-:77950-78003				-	101	4.92	1775.88	3.14	888.442	2		6	Testis; Male accessory glands
			RLLQQLTADGQSGGSGMGR	scaffold00124:-:77950-78006				-	81	4.69	1931.98	2.03	644.663	3		3	Testis
			PPALLPEQPPSSDINK	scaffold00124:78064-78111
			QCCCPATHQDDVGGLGGGR	scaffold00124:75778-75834
			YTGGIHTVTHPEER	scaffold00124:-:75736-75777				-	110	5.48	1596.78	3.44	798.895	2		20	Testis; Male accessory glands
48	ASTEI02533; ASTEI02535	scaffold00010:102533-154069	IMGcAQSAEER	scaffold00010:-:132891-132923	Yes	protein extension	ASTE003767-PA	KB664525:+:35256-35288	76	3.33	1251.55	0.58	626.277	2	C4(Carbamidomethyl)	5	Brain; Midgut
			IMGcAQSAEER	scaffold00010:-:132891-132923				KB664525:+:35256-35288	76	3.33	1251.55	0.58	626.277	2	C4(Carbamidomethyl)	5	Brain; Midgut
			MPNLSIAFGNNER	scaffold00010:128672-128710
			YFLDDLDRLGAK	scaffold00010:-:104297-104331
				scaffold00010:-:127670-127670
49	ASTEI02196; ASTEI02197	scaffold00008:2182186-2222153	VDLMFTR	scaffold00008:2193012-2193032	Yes	joining of genes	ASTE009507, ASTE009508	-	48	-	881.454	-1.11	441.231	2		1	Brain
			IGIILASPLETIDR	scaffold00008:+:2203308-2203334
				scaffold00008:+:2206157-2206171
50	ASTEI02356; ASTEI02357; ASTEI02358	scaffold00009:817265-913045	AMDPQEATTWFNALHSAIGK	scaffold00009:-:831575-831634	Yes	joining of genes	ASTE002039 ASTE002040 ASTE014216	-	58	2.66	2188.05	-0.47	730.021	3		2	Brain
			AMDPQEATTWFNALHSAIGK	scaffold00009:-:831575-831634				-	58	2.66	2188.05	-0.47	730.021	3		2	Brain
51	ASTEI07393 and ASTEI07392	scaffold00054:34076-61090			partial	protein extension	ASTE008831
			MIGSFWNLCR	scaffold00054:61010-61039
			LPTGTGYANGTIEPVSHSGR	scaffold00054:44153-44212				-	128	7.47	2013.97	-14.78	1007.49	2		3	Brain
			SEGPPAGVANGR	scaffold00054:44213-44248				-	43	2.91	1111.55	0.76	556.279	2		1	Brain
			MIGSFWNLCR	scaffold00054:61010-61039
52	ASTEI03815; ASTEI03816	scaffold00017:1815330-1865140	VNQPTLQHQR	scaffold00017:1821501-1821530	Yes	joining of genes	ASTE011363-PA, ASTE011365-PA	-	68	2.89	1220.65	-0.58	407.554	3		1	Testis

## Sheet: Table S5.7_Alternate start site
Supplemental Table S5.7 - A summary of results from proteogenomics analysis
Identification of protein alternate start sites
Prasad et al., 2016. Integrating transcriptomic and proteomic data for accurate assembly and annotation of genomes
	Protein Group Accessions	Reference sequence	Peptide Sequence	Genomic coordinates (Indian strain)	Position of novel start codon (annotated start codon's position=0)	Transcript evidence	Whether annotated as start site in SDA500	Gene in SDA-500	Position of novel start codon (annotated start codon's position SDA500=0)	Genomic coordinates (SDA-500)	Transcript evidence in SDA500	Ortholog evidence	Whether annotated as start site in ortholog	# PSMs	Modifications	Ion Score	Exp Value	Intensity	Charge	m/z [Da]	MH+ [Da]	ΔM [ppm]	Tissues
1	ASTEI07149-PA	MTETLNSNNHLSQK	tETLNSNNHLSQK	scaffold00050:-:3318-3356	1	Yes	Yes	ASTE006629-PA	0	KB665199:-:432250-432288	Yes	AGAP009135-PA	Yes	6	N-Term(Acetyl)	70.64	1.20083e-05	1488790	2	764.373	1527.74	-1.1343	Salivary glands
2	ASTEI09830-PA	MAQEEIVSNTK	aQEEIVSNTK	scaffold00105:+:13984-14013	3	Yes	no	ASTE009636-PA	3	KB664453:+:36755-36784	NA	XP_001866231.1	Yes	1	N-Term(Acetyl)	51.03	2.28769e-05	3373360	2	580.793	1160.58	-0.433335	Brain
3	ASTEI05331-PA	MASNLQQQR	aSNLQQQR	scaffold00030:+:314750-314773	3	Yes	no	ASTE004812-PA	NA	KB664434:+:493950-493973	NA	NP_001246399.1	Yes	5	N-Term(Acetyl)	60.58	1.92496e-06	7437112	2	493.754	986.501	-0.215833	Brain
4	ASTEI05334-PA	MAAVATK	aAVATK	scaffold00030:322130-322147; scaffold00030:322353-322356	4	Yes	Yes	ASTE004815-PA	0	-	Yes	AGAP010591-PA	Yes	2	N-Term(Acetyl)	34.64	0.0011681	31088.8	1	602.35	602.35	-0.724313	Entire mosquito
5	ASTEI09599-PA	MLSDVEELPSVQLGDYVLR	mLSDVEELPSVQLGDYVLR	scaffold00098:-:26641-26697	5	Yes	no		5	KB664777:-:51594-51650	no	AGAP008165-PE	Yes	1	N-Term(Acetyl)	88.29	3.33567e-09	70216	3	735.717	2205.14	11.0698	Legs
6	ASTEI09193-PA	MSGNLDILSLK	sGNLDILSLK	scaffold00085:+:33243-33272	7	Yes	Yes	ASTE008185-PA	0	KB664490:+:13054-13083	Yes	AGAP011777-PA	Yes	12	N-Term(Acetyl)	73.73	9.32015e-08	56733.1	2	551.315	1101.62	7.27752	Ovary
7	ASTEI10600-PA	MSQEYAQHVLK	sQEYAQHVLK	scaffold00142:-:170108-170137	7	Yes	Yes	ASTE000908-PA	0	KB664582:-:37493-37522	Yes	AGAP000189-PA	Yes	1	N-Term(Acetyl)	55	7.58947e-06	734177	2	622.818	1244.63	0.881452	Fat body
8	ASTEI01137-PA	MATQITIDQLNK	aTQITIDQLNK	scaffold00004:+:2573243-2573275	9	no	Yes	ASTE005430-PA	0	KB664821:-:273574-273606	Yes	AGAP000781-PA (MAAQQITIDQLDK)	Yes	1	N-Term(Acetyl)	44.74	5.87541e-05	2725123	2	643.851	1286.7	0.293061	Brain
9	ASTEI02055-PA	MDSSHLSWLIIR	mDSSHLSWLIIR	scaffold00008:+:129579-129614	10	Yes	Yes	ASTE010695-PA	0	KB664458:+:67049-67084	Yes	AGAP005427-PA	Yes	193	N-Term(Acetyl); M1(Oxidation)	104.9	1.55325e-10	209764	2	758.386	1515.76	1.20868	Malphigian tubules
10	ASTEI04621-PA	MADLGAPVR	aDLGAPVR	scaffold00024:-:1529447-1529470	12	Yes	Yes	ASTE015961-PA	NA	KB664832:-:692971-692994	NA	AGAP006879-PA	Yes	33	N-Term(Acetyl)	69.78	1.20976e-07	3533478	2	420.732	840.458	0.139305	Ovary, Malpighian tubules, Midgut, Fat body
11	ASTEI07789-PA	MSDPVARPMK	sDPVARPmK	scaffold00058:-:640335-640361	19	Yes	Yes	ASTE001294-PA	0	KB665188:+:175617-175643	Yes	AGAP000669-PA	Yes	3	N-Term(Acetyl); M8(Oxidation)	44.42	0.000144564	6184578	2	529.775	1058.54	11.4044	Legs
12	ASTEI08956-PA	MALSDADVQK	aLSDADVQK	scaffold00079:-:662096-662122	20	Yes	Yes	ASTE008999-PA	0	KB665132:+:39319-39345	Yes	AGAP002401-PA	Yes	3	N-Term(Acetyl)	57.13	1.37486e-05	174836	2	494.754	988.502	7.16952	Salivary gland
13	ASTEI08702-PA	MDFYHLPLSAPCQAVR	mDFYHLPLSAPcQAVR	scaffold00073:+:859778-859825	20	Yes	Yes	ASTE002925-PA	0	KB664488:+:1588472-1588519	Yes	AGAP004378-PA	Yes	33	N-Term(Acetyl); C12(Carbamidomethyl)	72.33	2.01753e-07	146450	2	973.966	1946.93	-0.00355432	Midgut
14	ASTEI05355-PA	MAFGDVK	aFGDVK	scaffold00030:-:1012879-1012896	21	Yes	Yes	ASTE010059-PA	0	KB664888:-:616622-616639	Yes	AGAP010613-PA	Yes	1	N-Term(Acetyl)	36.1	0.0017183	143818	1	678.343	678.343	-3.94533	Entire mosquito
15	ASTEI07670-PA	MSKPQSDIDK	sKPQSDIDK	scaffold00057:+:383057-383083	27	Yes	no	ASTE006480-PA	411	KB664288:+:3157715-3157741	NA	AGAP007939-PA	Yes	3	N-Term(Acetyl)	52.16	3.74003e-05	251028	2	530.271	1059.53	2.94193	Thorax
16	ASTEI00904-PA	MTYNLDELQAPAWLNDEFFCNVMR	tYNLDELQAPAWLNDEFFcNVMR	scaffold00003:+:3654980-3655048	30	Yes	no	ASTE008784-PA	669	KB664517:-:278317-278385	NA	AGAP003762-PA	Yes	3	N-Term(Acetyl); C19(Carbamidomethyl)	49.16	1.27406e-05	196492	3	963.439	2888.3	-0.243586	Male accessory glands
17	ASTEI05718-PA	MASSDNSYQVVQLPGPR	aSSDNSYQVVQLPGPR	scaffold00033:-:460414-460461	44	Yes	no	ASTE009765-PA	92	KB664631:+:100968-101015	NA	AGAP001501-PB	Yes	7	N-Term(Acetyl)	108.64	4.58189e-11	108795	2	880.433	1759.86	-1.18925	Ovary, Malpighian tubules, Midgut, Fat body
18	ASTEI00297-PA	MMDSLGLSGLAGGVQR	mDSLGLSGLAGGVQR	scaffold00001:-:4683148-4683192	49	Yes	Yes	ASTE009936-PA	3	KB664290:+:163634-163678	NA	AGAP003069-PA	no	1	N-Term(Acetyl)	71.65	7.52303e-06	247949	2	751.886	1502.77	1.60842	Salivary glands
19	ASTEI02221-PA	MVDAAVLEK	vDAAVLEK	scaffold00008:+:2459919-2459942	54	Yes	no	ASTE009536-PA	128	KB664400:+:681470-681493	NA	AGAP005627-PC; AGAP005627-PD	Yes	92	N-Term(Acetyl)	65.51	9.70106e-07	276914	2	443.748	886.489	1.04579	Proboscis
		MVDAAVLEK	mVDAAVLEK	scaffold00008:+:2459916-2459942	54	Yes			127	KB664400:+:681467-681493				2	N-Term(Acetyl)	55.1	8.80734e-06	103380	2	509.268	1017.53	-0.209252	Fat body
20	ASTEI05923-PA	MESVVDVK	mESVVDVK	scaffold00035:-:298095-298118	89	Yes	no	ASTE007984-PA	89	KB664755:-:276392-276415	Yes	AGAP004870-PA	Yes	1	N-Term(Acetyl)	50.64	5.13472e-05	72398	2	474.74	948.472	1.84199	Fat body
21	ASTEI01441-PA	MSIATYEEVLDLPNHPEK	sIATYEEVLDLPNHPEK	scaffold00005:-:2285745-2285795	146	Yes	no	ASTE002364-PA	158	KB664977:+:635423-635473		AGAP013228-PA	Yes	9	N-Term(Acetyl)	77.77	4.76261e-08	28430.6	2	998.994	1996.98	-2.46518	Entire mosquito
22	ASTEI09779-PA	MANPEGAQQQLPSYLTESLIQR	aNPEGAQQQLPSYLTESLIQR	scaffold00103:+:93160-93222	157	Yes	Yes	ASTE004298-PA	0	KB664367:-:563479-563541		no		9	N-Term(Acetyl)	75.5	6.48228e-08	3067884	3	795.739	2385.2	-0.335212	Proboscis
23	ASTEI09767-PA	MAESTESNTSTPTSAR	aESTESNTSTPTSAR	scaffold00102:-:366780-366824	217	Yes	no	ASTE009885-PA	219	KB665177:+:295976-296020		AGAP009902-PA	Yes	1	N-Term(Acetyl)	71.88	1.3297e-07	2381526	2	790.857	1580.71	1.94665	Brain
24	ASTEI08087-PA	MAQNGFGHAATQLK	aQNGFGHAATQLK	scaffold00062:-:156856-156894	415	Yes	no	ASTE006086-PA	67	KB664442:+:73413-73451		AGAP004793-PB	Yes	9	N-Term(Acetyl)	95.07	1.15134e-09	543528	2	692.853	1384.7	0.691183	Midgut
25	ASTEI08703-PA	MDLYYHIR	mDLYYHIR	scaffold00073:-:862950-862973	476	Yes				KB664488:-:1591646-1591669	Yes	AGAP004380-PA	Yes	5	N-Term(Acetyl)	51.61	4.27949e-05	869764	2	576.779	1152.55	0.778343	Midgut
26	ASTEI08290-PA	MSINAYEDIMLGSFANFIALSGK	sINAYEDIMLGSFANFIALSGK	scaffold00065:+:485761-485826	540	Yes	no	ASTE000016-PA	926;1524	-		AGAP010175-PB; AGAP010175-PD	Yes	1	N-Term(Acetyl)	58.78	2.84733e-06	45112.8	2	1202.1	2403.2	3.06969	Legs
27	ASTEI10044-PA	MAEHCIVEVSSGLIK	aEHcIVEVSSGLIK	scaffold00110:-:369053-369094	542	Yes	no	ASTE010340-PA	14	KB664433:-:215651-215692			no	18	N-Term(Acetyl); C4(Carbamidomethyl)	77.72	5.15584e-08	175088	2	792.412	1583.82	4.09333	Fat body
28	ASTEI04589-PA	MARPSYDEFSR	aRPSYDEFSR	scaffold00024:-:1021090-1021119	559	Yes	no	ASTE005619-PA	561	KB664832:-:85757-85786		AGAP006907-PA (case of gene splitting in Indian)	Yes	1	N-Term(Acetyl)	44.55	0.000198175	338223	2	635.297	1269.59	1.32096	Ovary
29	ASTEI08114-PA	MAANLRPLVPELAAIAR	aANLRPLVPELAAIAR	scaffold00062:-:555742-555789	884	Yes	no	ASTE003599-PA	895	-		AGAP004762-PA (is a case of gene splitting in stephensi)	Yes	50	N-Term(Acetyl)	91.45	1.79036e-10	311382	2	859.011	1717.01	1.0641	Midgut
30	ASTEI10069-PA	MAALSDAVLDALVFEHLSK	aALSDAVLDALVFEHLSK	scaffold00111:-:255989-256042	2541	Yes	no	ASTE000537-PA	2250	KB664510:-:112464-112517		AGAP005369-PA; AGAP005369-PB	Yes	61	N-Term(Acetyl)	118.49	2.54843e-12	23364.5	2	971.02	1941.03	0.0706222	Legs
31	ASTEI02235-PA	MSSSIQITADDKPATGLITPTK	sSSIQITADDKPATGLITPTK	scaffold00008:-:2613841-2613903	-142	Yes	no		-62	KB664400:-:860254-860316	no	AGAP005641-PA	Yes	15	N-Term(Acetyl)	93.49	1.126e-08	47763.4	2	1093.58	2186.16	3.08169	Legs
32	ASTEI01807-PA	mDNIFHQTDETFYETQYSR	mDNIFHQTDETFYETQYSR	scaffold00006:+:2953454-2953510	-1	Yes	Yes	ASTE009700-PA	0	KB664437:+:205023-205079	Yes	AGAP013713-PA	no	1	N-Term(Acetyl)	75.84	6.2678e-07	26557.6	2	1234.03	2467.05	-0.463274	Testis
33	ASTEI06229-PA	MaAVYGGTNVPPTAFNR	aAVYGGTNVPPTAFNR	scaffold00038:-:674282-674329	-48	Yes	no	ASTE011652-PA	94	KB664677:+:1058632-1058679	NA	AGAP000086-PA and AGAP000086-PC	Yes	1	N-Term(Acetyl)	52.31	0.000604233	37295.2	2	838.924	1676.84	0.654254	Salivary glands
34	Scaffold rearrangement + alternate start site Insertion of scaffold02435 in scaffold00101 between contig ALPR02006621.1 and ALPR02006622.1	mDDGAASTGVIVK	mDDGAASTGVIVK	scaffold02435:+:1940-1978		Yes	Yes	ASTE004453-PA	0	KB665365:+:501405-501443		AGAP007249-PA; AGAP007249-PB	Yes	11	N-Term(Acetyl); M1(Oxidation)	107.82	3.04457e-09	1033173	2	661.324	1321.64	7.42417	Legs
35	ASTEI07997-PA	MaSQVQSIHTPSVALSK	aSQVQSIHTPSVALSK	scaffold00060:-:1099900-1099947		Yes	no	ASTE000720-PA	+953	KB664510:-:2997450-2997497	Yes	AGAP002547-PA	Yes	29	N-Term(Acetyl)	89.46	5.65068e-08	108575	2	847.958	1694.91	1.31398	Midgut
36	novel gene 20	MsHANSTTIGIEDDISSR	sHANSTTIGIEDDISSR	scaffold00010:-:1127874-1127924		Yes	Yes	ASTE014947-PA	0	KB664477:+:644616-644616	Yes	-		1	N-Term(Acetyl)	105.49	2.79239e-09	274063	2	922.933	1844.86	-1.34586	Ovary, Malpighian tubules, Midgut, Fat body
37	ASTEI06800-PA	mDLVKPFMGLNVDR	mDLVKPFMGLNVDR	scaffold00044:+:715163-715204	-51	Yes				KB665066:+:421221-421262	Yes	Hexokinase (Culex quinquefasciatus; Aedes aegypti; Anopheles arabiensis)	Yes	4	N-Term(Acetyl)	83.73	3.95894e-07	941921	2	838.93	1676.85	1.27446	Midgut
38	ASTEI00498-PA	MsAFLQcIEVENFK	sAFLQcIEVENFK	scaffold00002:-:2443131-2443169	-58	Yes	Yes	ASTE000481-PA	0	KB664580:+:161917-161955	Yes	structural maintenance of chromosomes protein 1A (Anopheles darlingi, Aedes aegypti)	Yes	1	N-Term(Acetyl); C6(Carbamidomethyl)	75.41	3.75644e-06	13534.7	2	813.896	1626.79	1.17599	Testis
39	ASTEI09857-PA	MaSNNNNSTPATPSGTK	aSNNNNSTPATPSGTK	scaffold00105:+:304994-305041	-11	Yes	Yes	ASTE009666-RA	0	KB664453:+:379976-380023	Yes	-	NA	4	N-Term(Acetyl)	103.46	5.71861e-09	203215	2	801.871	1602.74	-0.282592	Head
40	ASTEI05467-PA	MtDVAHELGALR	tDVAHELGALR	scaffold00031:+:530828-530860	-41	Yes	no	protein extension of ASTE011504		KB665299:-:606868-606900	Yes	AGAP001515-PA	Yes	2	N-Term(Acetyl)	61.88	7.98145e-05	17749.5	2	612.328	1223.65	8.5213	Legs
41	ASTEI03858-PA	MaAADVAVmK	aAADVAVmK	scaffold00018:-:251537-251563	-29	Yes	Yes	ASTE011307-PA	0	KB664788:-:285711-285737	Yes	septin (Culex quinquefasciatus)	Yes	1	N-Term(Acetyl); M8(Oxidation)	63.34	5.07706e-05	48694.2	2	467.24	933.472	1.30918	Antennae
42	ASTEI05767-PA	MtSATGEVFIVSAAR	tSATGEVFIVSAAR	scaffold00033:-:1072192-1072233	-9	Yes	Yes	ASTE004170-PA	0	KB664943:+:679150-679191	Yes	AGAP001318; Acetyl coA acetyl transferase (Anopheles darlingi, Aedes aegypti)	Yes	2	N-Term(Acetyl)	72.97	5.24091e-06	15523.5	2	725.882	1450.76	1.9418	Ovary
43	ASTEI09973-PA	MaAAHSGGVEWAAILKPFLSSSSENISK	aAAHSGGVEWAAILKPFLSSSSENISK	scaffold00107:-:491311-491391	-4	Yes	Yes	ASTE005756-PA	0	KB664710:-:636197-636277	Yes	AGAP001157-PA; Auxin transport protein (Aedes aegypti, Anopheles darlingi)	Yes	5	N-Term(Acetyl)	101.23	8.81426e-10	171427	3	933.816	2799.43	0.675297	Male accessory glands
44	ASTEI03481-PA	MsDPVEVEQmSETKPR	sDPVEVEQmSETKPR	scaffold00015:+:167098-167142	-37	Yes	no			KB664732:-:2501905-2501949	Yes	AGAP000889-PA; AaeL_AAEL009467; CG6891, isoform A	Yes	39	N-Term(Acetyl); M9(Oxidation)	97.57	9.47542e-09	90391.4	2	895.414	1789.82	-3.70871	Antennae
45	ASTEI08696-PA	MaQILTNIYDWYR	aQILTNIYDWYR	scaffold00073:+:768997-769032	-7	Yes	Yes	ASTE002919-PA	0	KB664488:+:1496667-1496702		AGAP004372-PA	Yes	2	N-Term(Acetyl)	77.93	1.59615e-06	121640	2	799.408	1597.81	4.49809	Legs
46	ASTEI01516-PA	mQQNNQLQQPDDPQR	mQQNNQLQQPDDPQR	scaffold00005:+:3303660-3303704	-1	Yes	Yes	ASTE001776-PA	0	KB664599:-:988181-988225		AGAP007618-PA	Yes	2	N-Term(Acetyl); M1(Oxidation)	79.43	9.24172e-07	253275	2	949.427	1897.85	0.0379799	Proboscis
47	ASTEI01219-PA	MaKPAQLLNIDPANELK	aKPAQLLNIDPANELK	scaffold00004:+:4363817-4363864	-9	Yes	Yes	ASTE007468-PA	0	KB665310:+:378545-378592		AGAP000626-PA	Yes	97	N-Term(Acetyl)	105.48	6.63961e-10	197707	2	888.997	1776.99	1.02819	Midgut
48	ASTEI08560-PA	mNAFGDNFEQSEVDPAAEFLAR	mNAFGDNFEQSEVDPAAEFLAR	scaffold00030:-:989460-989525		Yes	Yes	ASTE010054-PA	0	KB664888:-:594011-594076	Yes	AGAP010608-PA; clathrin light chain (Culex quinquefasciatus)	Yes	9	N-Term(Acetyl); M1(Oxidation)	100.99	2.82238e-09	33860	2	1258.56	2516.11	2.90213	Proboscis
49	ASTEI01213-PA	mNTVQSTGHATVR	mNTVQSTGHATVR	scaffold00004:+:4234459-4234497	0	Yes	Yes	ASTE007460-PA	0	KB665310:+:249313-249351	Yes			6	N-Term(Acetyl); M1(Oxidation)	80.98	1.24328e-06	52420.9	2	730.352	1459.7	0.0699324	Brain
50	ASTEI00491-PA	mEIAQAVSNAFWSTK	mEIAQAVSNAFWSTK	scaffold00002:+:2282824-2282868	-15	Yes	Yes	ASTE003549-PA	0	KB664623:-:101421-101465		AGAP001761	Yes	18	N-Term(Acetyl)	101.04	8.4332e-09	54703.7	2	862.927	1724.85	8.86286	Legs
51	novel gene	mIGSFWNLcR	mIGSFWNLcR	scaffold00054:-:61010-61039		Yes	Yes	ASTE014999-PA	0	KB664356:-:730778-730807		CG17816, isoform F (Drosophila melanogaster)	Yes	1	N-Term(Acetyl); M1(Oxidation); C9(Carbamidomethyl)	69.82	1.79018e-05	112815	2	671.309	1341.61	1.95145	Brain
52	ASTEI06445-PA	mDATSIITQVSR	mDATSIITQVSR	scaffold00040:1315650-1315685	-227	Yes	no	-	-	-	Yes	CG5830, isoform A (Drosophila melanogaster)	Yes	1	N-Term(Acetyl); M1(Oxidation)	68.78	2.18251e-05	83120.1	2	690.343	1379.68	-3.22388	Ovary, Malpighian tubules, Midgut, Fat body
53	ASTEI06118-PA	MaGVQQTGNMQQMASHSEK	aGVQQTGNMQQMASHSEK	scaffold00036:-:1303626-1303679		Yes	no	ASTE003549-PA	467	KB665276:+:169997-170050	Yes	AGAP012049	Yes	1	N-Term(Acetyl)	72.97	3.52254e-06	1110635	2	987.444	1973.88	0.216366	Salivary glands

## Sheet: Table S5.8_Joining of exons
Supplemental Table S5.8 - A summary of results from proteogenomics analysis
Joining of exons/intron retention
Prasad et al., 2016. Integrating transcriptomic and proteomic data for accurate assembly and annotation of genomes
	Genes involved (in Indian strain)	Peptide sequence	Genomic coordinates of identified peptide (Indian)	Revised coordinates for the extended exon	Transcript evidence (Yes/No)	Category (according to SDA500)	Gene involved (in SDA500)	Genomic coordinates of identified peptides (SDA-500)	Mascot score	Sequest score	MH+1	Mass error (Da)	m/z	Charge	Modification(s)	#PSMs
1	ASTEI01466	LEFTPTEAPEVETMPLPEKLEEIKPK	scaffold00005:+:2673766-2673843	scaffold00005:+:2673169-2674845	Yes	Annotated	ASTE002334	-	35	4.63	2995.55	-2.39	999.189	3		2
		QQKPKPQEEVAEEK	scaffold00005:+:2673883-2673924					-	54	5.12	1667.87	3.14	556.627	3		5
2	ASTEI01417	DSLTSNAPLAASIK	scaffold00005:+:2027967-2028008	scaffold00005:+:2027772-2032132	Yes	joining of exons	ASTE005951	KB664289:+:1876750-1876791	64	2.76	1387.74	1.18	694.376	2		1
		ASTGSQSAGAASPSLSVR	scaffold00005:+:2028606-2028659					KB664289:+:1877389-1877442	63	2.43	1633.82	1.83	817.412	2		1
3	ASTEI01466	EETPKPTEEPTIVQR	scaffold00005:2674879-2674923	scaffold00005:2674118-2675076	Yes	Annotated	ASTE002334	-	64	3.66	1753.89	-1.66	585.303	3		2
		EPQLSEPEQPKPAPWR	scaffold00005:2674924-2674971					KB664977:-:251666-251713	52	3.86	1888.95	-0.15	630.323	3		1
4	ASTEI01466	VFIDDSQPLPELEIITQK	scaffold00005:2675650-2675703	scaffold00005:2674942-2677425	Yes	Annotated	ASTE002334	KB664977:-:250934-250987	54	6.02	2085.12	5.87	695.713	3		9
		QLIETTQQQVAETK	scaffold00005:2675758-2675799				ASTE002334	KB664977:-:250838-250879	85	4.75	1616.85	0.9	808.929	2		2
5	ASTEI01466	SSITQPHEPETPKK	scaffold00005:2700987-2701028	scaffold00005:2700048 - 2703480	No	Annotated	ASTE002332	KB664977:-:222064-222105	42	2.75	1578.81	-2.46	526.941	3		1
		DQVTSIDDLSTAQASEETR	scaffold00005:2701227-2701283				ASTE002332	KB664977:-:221809-221865	124	5.49	2065.95	-0.31	1033.48	2		1
6	ASTEI01466	AKPSVEEEEEVQTK	scaffold00005:2708126-2708167	scaffold00005:2703768-2708924	Yes	Annotated	ASTE002332	-	89	6.15	1602.79	1.07	534.934	3		8
		KKPSITEPEEAEATFK	scaffold00005:2708183-2708230					-	58	4.94	1804.93	-1.41	602.315	3		2
7	ASTEI01537	TLELEFTYAPR	scaffold00005:3478104-3478136	scaffold00005:3477932-3479699	Yes	Annotated	ASTE002332	-	46	2.39	1339.69	0.34	670.349	2		1
8	ASTEI01585	KIWQATK	scaffold00005:3844132-3844152	scaffold00005:3843373-3844278	Yes	Annotated	ASTE001711	-	53	-	874.514	-1.16	437.76	2		3
9	ASTEI03753	ALIEEITTEEYTDITATK	scaffold00017:+:632498-632551	scaffold00017:632,214-635,031	Yes	Annotated	ASTE010781	-	13	3.68	1801.86	0.4	601.292	3		1
		GSTFGDSGIEPDKSQSEESTK	scaffold00017:+:632732-632794					KB664555:-:721006-721068	119	3.75	2041.02	0.29	1021.02	2		1
10	ASTEI04136	SNNMGGGGGGGGGMGGGNNNR	scaffold00020:-:2046612-2046674	scaffold00020:-:2046612-2046761	No	Annotated	ASTE005210	KB664522:+:145621-145683	56	3.37	2185.97	-1.31	729.328	3		2
		SNNmGGGGGGGGGMGGGNNNR	scaffold00020:-:2046612-2046674				ASTE005210	KB664522:+:145621-145683	182	5.53	1778.71	2.26	889.858	2		4
		GNNQGmGGGVSGmGGSGGGGMGGGGGmSR	scaffold00020:-:2046675-2046761				ASTE005210	KB664522:+:145534-145620	152	2.46	1794.7	0.79	897.854	2	M4(Oxidation)	1
		gNNQGMGGGVSGMGGSGGGGMGGGGGMSR	scaffold00020:-:2046675-2046761				ASTE005210	KB664522:+:145534-145620	24	-	2432.94	-1.47	811.65	3	M6(Oxidation); M13(Oxidation); M27(Oxidation)	1
		GNNQGMGGGVSGmGGSGGGGMGGGGGMSR	scaffold00020:-:2046675-2046761				ASTE005210	KB664522:+:145534-145620	76	8.34	2529.05	-0.81	843.69	3	N-Term(iTRAQ4plex)	1
		GNNQGMGGGVSGMGGSGGGGMGGGGGMSR	scaffold00020:-:2046675-2046761				ASTE005210	KB664522:+:145534-145620	146	4.92	2400.95	-0.33	1200.98	2	M13(Oxidation)	1
11	ASTEI04523	KEDEAVPGVSGVR	scaffold00023:+:1957732-1957770	scaffold00023:1957264-1959267	No	Annotated	ASTE004330	KB665121:-:358879-358917	160	7.86	2384.98	8.49	1192.99	2		2
		VGQVEGTGSVNR	scaffold00023:+:1957771-1957806					-	-	2.76	1342.7	-0.63	671.851	2		1
12	ASTEI03749	SYTEAEVSDIcR	scaffold00017:472148-472183	scaffold00017:471796-472696	Yes	joining of exons	ASTE010786	KB664555:+:903975-904010	82	3.66	1202.61	0.32	601.81	2		3
13	ASTEI05373	LHNNQHIIGINNK	scaffold00030:-:1182028-1182066			protein extension	ASTE010080	KB664888:-:888340-888378	69	3	1429.63	-0.8	715.316	2	C11(Carbamidomethyl)	2
		lIGTNVGDLk	scaffold00030:-:1182088-1182117					KB664888:-:888400-888429	77	2.46	1029.6	1.64	515.301	2		9
14	ASTEI07604	KLEPSNIPK	scaffold00056:-:478952-478978	scaffold00056:477341-479687	Yes	novel exon	ASTE010932	KB664512:-:308769-308795	54	2.78	1091.52	-0.7	546.264	2		10
		TVLEQQVTR	scaffold00056:-:478979-479005					KB664512:-:308796-308822	-	3.13	1025.6	1.33	513.304	2		3
		LQVEHTFEQQTGAK	scaffold00056:-:479135-479176					KB664512:-:308952-308993	38	-	1014.6	1.77	507.802	2		1
15	ASTEI05033	ALLNWSTQIAR	scaffold00027:+:1591315-1591347	scaffold00027:1590347-1594800	Yes	novel exon	ASTE002192	KB665032:-:157417-157449	-	1.07	1300.56	-9.32	650.786	2	M5(Oxidation)	1
		NVLVQTPScVK	scaffold00027:+:1591402-1591434					KB665032:-:157330-157362	63	2.07	1272.71	0.31	636.857	2		1
		LLDYDSDEYR	scaffold00027:+:1591459-1591488					KB665032:-:157276-157305	44	2.17	864.483	0.42	432.745	2		2
		DVPELIEIGHK	scaffold00027:+:1591642-1591674					KB665032:-:157090-157122	71	2.39	1288.57	-2.24	644.787	2		1
16	ASTEI11198	SDNYNPPIANEEQR	scaffold00644:+:1558-1599	scaffold00644:944-4923	Yes	novel gene	-	-	67	3.02	1233.62	-0.24	617.315	2		5
17	ASTEI09057	GYTHccSVPAAQK	scaffold00081:772559-772597	Scaffold00081:772,502-772,927	No	Annotated	ASTE003572	KB664440:+:490334-490372	45	2.41	1646.74	-1.21	823.873	2		1
18	ASTEI09834	IEQDSSATSEPTR	scaffold00105:+:68266-68304	scaffold00105:78909-81026	Yes	protein extension	ASTE009640	KB664453:+:86293-86331	29	2.13	1259.68	-0.46	630.345	2		2
		IEQDSSATSEPTRR	scaffold00105:+:68266-68307					KB664453:+:86293-86334	132	4.09	1420.66	1.01	710.832	2		3
		LGPAPIASMEDTTAEEK	scaffold00105:+:76142-76192					KB664453:+:94167-94217	43	3.24	1576.76	-0.52	526.257	3		1
		DGAQELSVSSAHDPHR	scaffold00105:+:79731-79778					KB664453:+:97760-97807	52	-	906.508	-0.79	453.757	2		2
		SPSPANVSVSR	scaffold00105:+:79803-79835					KB664453:+:97832-97864	95	5.84	1705.79	-1.39	853.397	2		5
		TSTASNESGTLGGR	scaffold00105:+:79932-79973					KB664453:+:97961-98002	70	2.73	1100.57	-0.01	550.788	2		1
		YYDQQTDHPSASNNSTPSK	scaffold00105:+:79974-80030					KB664453:+:98003-98059	78	3.57	1337.63	0.9	669.319	2		1
		IDNPDGSIIIPLK	scaffold00105:+:80508-80546					KB664453:+:98537-98575	61	5.8	2139.92	1.6	1070.47	2		3
		SPIEDKENSTQHWENVIGELSQR	scaffold00105:+:80547-80615					KB664453:+:98576-98644	45	2.83	1394.79	-0.38	697.898	2		2
		NSSTVSQSSEGSLQK	scaffold00105:+:81015-81059	scaffold00105:80613-83805				KB664453:+:99044-99088	45	7.45	2696.29	-0.34	899.435	3		1
		APSGHEDGANDSSALVGSGIVGGGGAQTR	scaffold00105:+:81060-81146					KB664453:+:99089-99175	88	4.28	1538.73	-0.41	769.868	2		8
		DSYVAENSTEAITDEVAAVVSR	scaffold00105:+:81345-81410					KB664453:+:99374-99439	145	7.56	2624.23	0.69	1312.62	2		3
		SSSPTEcISSDAK	scaffold00105:+:81411-81449					KB664453:+:99440-99478	127	5.54	2326.11	0.5	1163.56	2		2
19	ASTEI06801	SNQATTESLANTPSK	scaffold00044:+:739262-739306	scaffold00044:738937-740520	Yes	protein extension	ASTE008260	KB665066:+:445398-445442	79	2.88	1368.6	0.24	684.801	2	C7(Carbamidomethyl)	1
20	ASTEI010044	MVENLHADR	scaffold00110:-:367378-367404	scaffold00110:366567-367720	Yes	novel exon	ASTE010340	KB664433:-:213976-214002	89	4.64	1548.75	0.7	774.879	2		2
21	ASTEI007063	ILVMDAGEAR	scaffold00096:9075-9110			Annotated	ASTE007063	KB664481:-:151754-151783	41	1.88	1074.56	0.04	537.784	2		2
22	ASTEI00809	FLDISYNNLK	scaffold00003:+:2178348-2178377	scaffold00003:2177346-2178503	No	Annotated	ASTE001937	-	63	2.78	1226.64	-0.36	613.824	2		3
		FLDISYNNLKK	scaffold00003:+:2178348-2178380					-	52	3.85	1354.74	3.77	452.252	3		2
		KIDLENLTSQR	scaffold00003:+:2178378-2178410					KB665165:-:713198-713230	68	4.11	1316.72	3.94	658.865	2		3
		IDLENLTSQR	scaffold00003:+:2178381-2178410					KB665165:-:713198-713227	91	2.93	1188.63	3.33	594.817	2		2
23	ASTEI02191			scaffold00008:1967657-1968533	Yes	Annotated	ASTE009501
		INFNEGGINVHPQYVGSLYDIATIR	scaffold00008:+:1968066-1968140					KB664481:+:193446-193520	105	5.35	2790.42	0.4	1395.71	2		35
		TYEGmEGISAAAVGAPIR	scaffold00008:+:1970572-1970625	scaffold00008:1970083-1970892				KB664400:+:195950-196003	120.0	3.69	1808.88262	-1.22	904.94495	2	M5(Oxidation)	1
		TYEGMEGISAAAVGAPIR	scaffold00008:+:1970572-1970625					KB664400:+:195950-196003	120.0	3.69	1808.88262	-1.22	904.94495	2	M5(Oxidation)	1
24	ASTEI10458	QSHNmPEPSSQQSSQQQHGQQPQK	scaffold00132:+:221374-221445	scaffold00132:215562-223839	Yes	Annotated	ASTE003691	KB664444:+:1415751-1415822	33	6.31	2747.22	-0.21	687.56	4	M5(Oxidation)	2
		QSHNMPEPSSQQSSQQQHGQQPQK	scaffold00132:+:221374-221445					KB664444:+:1415751-1415822	37	6.1	2731.23	1.09	911.08	3		2
25	ASTEI01861	AGVYHFNPPPGFEEK	scaffold00006:+:3901998-3902042	scaffold00006:3901354-3902303	Yes	Annotated	ASTE007296	KB664417:-:418616-418660	61	4.5	1688.81	3.4	844.91	2		7
		AQASAEGSPVAAVAPTSPK	scaffold00006:+:3902064-3902120					KB664417:-:418538-418594	117	6.09	1738.9	-0.4	869.952	2		4
		HATITHSDDSSNTTASPK	scaffold00006:+:3902121-3902174					KB664417:-:418484-418537	76	5.28	1869.86	-0.35	623.957	3		2
26	ASTEI01750	IQTQAFSASLTPLR	scaffold00006:-:1778179-1778220	scaffold00006:1777803-1778399	Yes	Annotated	ASTE006332	KB664288:+:972202-972243	86.0	2.68	1532.86211	12.35	766.93469	2		2
		VAVEILDK	scaffold00006:-:1778242-1778265					KB664288:+:972157-972180	48.0	2.35	886.52556	1.24	443.76642	2		3

## Sheet: Table S5.9_Genome refinements
Supplemental Table S5.9 - A summary of results from proteogenomics analysis
Examples of Genome scaffold rearrangements (GSR) and genome gap regions (GGR) identified from peptides
Prasad et al., 2016. Integrating transcriptomic and proteomic data for accurate assembly and annotation of genomes
	Peptide sequence	Ortholog	Category (according to Indian)	Mascot score	Sequest score	MH+ [Da]	Delta M (ppm)	m/z [Da]	Charge	Modifications	no. PSMs	Tissues
1	VAVGANIRQLGVSMARNVYW	AGAP003573-PB	GSR/MGA	-	2.17	2204.18	2.83	735.399	3		1	Hemolymph
2	GAAGGAVGGDGGDDENDKEKEEEAER	AGAP003509-PA	GGR/MGA	44	5.95	2562.08	-0.45	854.699	3		14	Head
3	fRDADYEAAGASIVDGR	AGAP003167-PA	GGR/RGA	53	6.37	1956.95	-0.03	652.989	3	N-Term(iTRAQ4plex)	1	Midgut
	DADYEAAGASIVDGR			84	4.46	1509.68	0.42	755.345	2		9	Midgut
	FRDADYEAAGASIVDGR			113	5.55	1812.85	0.83	906.93	2		3	Midgut
	dADYEAAGASIVDGR			108	5.18	1653.78	-4.13	827.392	2	N-Term(iTRAQ4plex)	2	Midgut; Malpighian tubules; Ovary; Fat body
4	ILMSTIISDHMLVSLEELIR	AGAP002803-PA	GGR/MGA	-	3.02	2313.28	10.53	771.765	3		1	Brain
5	LLLTNIEPAQGGK	AGAP002154-PA	GGR/RGA	93	3.99	1353.77	-0.62	677.39	2		6	Salivary glands
	AcPETELSMcLR			41	1.17	1466.64	-0.49	733.825	2	C2(Carbamidomethyl); C10(Carbamidomethyl)	1	Salivary glands
6	NDIEELFR	AGAP001936-PA	GGR/RGA	63	2.96	1035.51	2.54	518.26	2		9	Salivary glands
	TEKLVYQILSDLGLPSGK			46	4.72	1961.1	3.91	654.373	3		1	Brain
	ADFTFEKFYELYHK			64	5.8	1837.89	3.06	613.3	3		1	Brain
	LVYQILSDLGLPSGKNDVIEK			64	7.01	2301.27	0.2	767.762	3		6	Head
	SEGREGDVIELcQVSDIR			52	6.08	2061.99	2.77	688.002	3	C12(Carbamidomethyl)	3	Head
	FYELYHK			47	2.22	999.493	-0.67	500.25	2		4	Brain
	ADFTFEK			41	1.89	857.404	0.4	429.206	2		4	Brain
	LVYQILSDLGLPSGK			81	4.72	1602.91	-0.38	801.958	2		17	Brain
7	YNIEKDIAAYIK	AGAP001335-PA	GSR/RGA	108	5.6	1440.77	-1.43	720.889	2		33	Proboscis
	YNIEKDIAAYIKK			93	6.8	1568.87	-0.54	784.937	2		25	Midgut
	yNIEkDIAAYIk			63	4.5	1873.09	3.38	937.047	2	N-Term(iTRAQ4plex); K5(iTRAQ4plex); K12(iTRAQ4plex)	3	Midgut
8	EEEMRDTNESTNSR	AGAP001064-PA	GSR/RGA	43	3.51	1697.7	0.29	566.573	3		2	Midgut
	sYEGIGEAAk			59	4.48	1312.7	0.31	656.853	2	N-Term(iTRAQ4plex); K10(iTRAQ4plex)	2	Midgut
	SYEGIGEAAK			68	2.67	1024.49	-0.41	512.751	2		29	Fat body
	EEEmRDTNESTNSR			42	3.11	1713.7	-0.2	571.904	3	M4(Oxidation)	1	Ovary
	DTNESTNSR			58	2.39	1023.43	-0.86	512.22	2		3	Ovary
9	sFGVkPILDYSVEEDLSQEEAEkR	AGAP003860-PB	GGR/RGA	41	4.76	3200.67	-0.31	1067.56	3	N-Term(iTRAQ4plex); K5(iTRAQ4plex); K23(iTRAQ4plex)	3	Midgut
	EVEASVSSAGTNLSEDSADSLPQYSVDKTFADR			58	7.02	3475.6	1.58	1159.21	3		6	Midgut
	EVEASVSSAGTNLSEDSADSLPQYSVDK			102	8.08	2885.31	-0.83	962.443	3		62	Head
	SFGVKPILDYSVEEDLSQEEAEKR			119	10.31	2768.37	1.18	923.46	3		172	Midgut
	REVEASVSSAGTNLSEDSADSLPQYSVDK			21	2.25	3041.42	0.4	1014.48	3		1	Midgut
	EVEASVSSAGTNLSEDSADSLPQYSVDKTFADRR			92	8.88	3631.69	-2.33	1211.24	3		7	Brain
	sFGVkPILDYSVEEDLSQEEAEk			67	7.84	3044.54	-10.71	1015.52	3	N-Term(iTRAQ4plex); K5(iTRAQ4plex); K23(iTRAQ4plex)	2	Midgut; Malpighian tubules; Ovary; Fat body
10	AAALDVHENEPYNVFQGALK	AGAP003893-PB	GSR/RGA	96	7.57	2186.09	-1.03	1093.55	2		25	Salivary glands
11	DVADFLYTILADK	AGAP006688-PA	GGR/RGA
	IPVVVLCNK
12	LTLNDPDIASGQGIK	AGAP003725-PB	GSR/RGA

## Sheet: Table S5.10_RT-PCR results
Supplemental Table S5.10 - A summary of results from proteogenomics analysis
Novel events confirmed by RT-PCR
Prasad et al., 2016. Integrating transcriptomic and proteomic data for accurate assembly and annotation of genomes
	Primer Name	Primer Sequence	EST#	dbEST Id	Novel/Modification	Source	Novel peptides	Scaffold	Category according to AsteI1 assembly	Category according to AsteI2 assembly
1	seq28_FP	CAGTACTACGCACTGTTCGAC	IOB_NIMR_AST0001.1	77967688	Novel	Midgut	LQSLTFQNIK ILEKLQSLTFQNIK VLTAVDSQPMFDGGVLINVLGR LQCDEDPPHAYSQTFVLKPLGGTFFCAHDIFR VLTAVDSQPMFDGGVLINVLGR VLTAVDSQPMFDGGVLINVLGR VLTAVDSQPMFDGGVLINVLGR	scaffold02222	Novel	Annotated
2	seq28_RP	GCCGAGTTGTGAATGTTGAG	IOB_NIMR_AST0001.2	77967689
3	seq795_FP	GAGAGAGAAATAAACCGCATTC	IOB_NIMR_AST0001.3	77967690	Novel	Midgut	LQSLTFQNIK ILEKLQSLTFQNIK VLTAVDSQPMFDGGVLINVLGR LQCDEDPPHAYSQTFVLKPLGGTFFCAHDIFR
4	seq795_RP	GCACTCATACACACAGAACAG	IOB_NIMR_AST0001.4	77967691
5	seq1110_FP	CTCGTTAATGTGCTTCGTC	IOB_NIMR_AST0002.1	77967692	Novel	Midgut	EEGGLVTIATQEDK EEGGLVTIATQEDKIK LLGNVEENVLR LLGNVEENVLR LLGNVEENVLR LLGNVEENVLR FVCHVVGITFQTIDR KFVCHVVGITFQTIDR KFVCHVVGITFQTIDR EIIYLANILEK ALTNFPHTDFVLCK ALTNFPHTDFVLCK ALTNFPHTDFVLCK LYQFNPHLMNQNITYIILLK LYQFNPHLMNQNITYIILLK ENQYDLEANLACLK ENQYDLEANLACLK ENQYDLEANLACLK IIEAYVEEQAR IIEAYVEEQAR IIEAYVEEQAR VMPIQEMLK	scaffold04663	Novel	Annotated
6	seq1110_RP	CTGTACCAGTTCAATCCACAC	IOB_NIMR_AST0002.2	77967693
7	seq916_FP	GATGCCGATTCAGGAAATG	IOB_NIMR_AST0002.3	77967694
8	seq916_RP	CTCGTTAATGTGCTTCGTC	IOB_NIMR_AST0002.4	77967695
9	seq660_FP	GAATCTAAGCTAGTTGTCG	IOB_NIMR_AST0003.1	77967696	Novel	Midgut	IGLCAFSGFK AIVGASLSEIMAK AIVGASLSEIMAK AIVGASLSEIMAK AIVGASLSEIMAK AIVGASLSEIMAK	scaffold01080	Novel	Annotated
10	seq660_RP	CTTCGTCTTCTGCTGCTTAG	IOB_NIMR_AST0003.2	77967697
11	seq779_FP	TGACTGAAATGGAGGACACTC	IOB_NIMR_AST0004.1	77967771	Novel	Testis	SCGEETVIAIK SCGEETVIAIK YEDICPSTHNMDVPNVK YEDICPSTHNMDVPNVK EDLKIPEGELGTQLR VHMVGIDIFTGK EDYQLTDIDDGFLVLMSDNGDLR	scaffold02117	Novel	Annotated
12	TstRP101_FP	ATGACTGAAATGGAGGACAC	IOB_NIMR_AST0004.2	77967772	Novel		YEDICPSTHNMDVPNVK VHMVGIDIFTGKK SCGEETVIAIK EDYQLTDIDDGFLVLMSDNGDLR EDLKIPEGELGTQLR VHMVGIDIFTGK SCGEETVIAIK YEDICPSTHNMDVPNVK		Novel	Annotated
13	TstRP101_RP	TTATCACCTGAGGTGTTG	IOB_NIMR_AST0004.3	77967773
14	seq659_FP	ATGAAAATCTGGAAGGATG	IOB_NIMR_AST0005.1	77967698	Novel	Midgut	LVDDVMYEVYGK VKLVDDVMYEVYGK TLGDVQLDGANPSAEEAEEGTESATETGVDIVLNHR LVDDVMYEVYGK KQFTTYLK LVETGFSDK SPGEVEVFK DIDGESVPILLCFK TLGDVQLDGANPSAEEAEEGTESATETGVDIVLNHR FKDLQFFTGESMDCEGLIAMLEYR SPGEVEVFKTNINK QFTTYLKDYMK TLGDVQLDGANPSAEEAEEGTESATETGVDIVLNHR VKLVDDVMYEVYGK DIDGESVPILLCFK DIDGESVPILLCFK TLGDVQLDGANPSAEEAEEGTESATETGVDIVLNHR LVDDVMYEVYGK	scaffold03026	Novel	Annotated
15	seq659_RP	AGAACTTCTCTTCCTCCAG	IOB_NIMR_AST0005.2	77967699
16	seq556_FP	CTGTTCGTTGAGGTTAATCG	IOB_NIMR_AST0006.1	77967765	Novel	Ovary	VDLENNIQSLREELTFK	Orthology based	Novel	Annotated
17	P6766302_FP	ATGAAAAACCTCACGGAAG	IOB_NIMR_AST0007.1	77967700	Novel	Midgut	NLTEVLHK EQFFGISPER	scaffold01705	Novel	Annotated
18	P6766302_RP	TACCCAATGAAGTTGAAC	IOB_NIMR_AST0007.2	77967701
19	seq1052_FP	ATGACTGAAGAGGTTAAC	IOB_NIMR_AST0008.1	77967702	Novel	Midgut	SQIVSIQQEIER ACGVSRPIVACSVTIDEGSQLK ACGVSRPIVACSVTIDEGSQLK ACGVSRPIVACSVTIDEGSQLK ACGVSRPIVACSVTIDEGSQLK IMTLIQQAVNYK IMTLIQQAVNYK IMTLIQQAVNYK AYPLADQALTSK	scaffold00511	Novel	Annotated
20	seq1052_RP	TTAAACGAGCAGTCG	IOB_NIMR_AST0008.2	77967703
21	seq146_FP	CCTCCGAAGAAGGATACCAAG	IOB_NIMR_AST0009.1	77967704	Novel	Midgut	DKLNNQVLFDK DKLNNQVLFDK LNNQVLFDK DKLNNQVLFDK DKLNNQVLFDK LITPSVVSER LITPSVVSER QVVHHHAQVIYTR	scaffold05487	Novel	Annotated
22	seq146_RP	TTACGCCACCGGGTCGTC	IOB_NIMR_AST0009.2	77967705
23	seq935_FP	GTACGCGTTGCGTCAGTaTTTC	IOB_NIMR_AST0010.1	77967706	Novel	Midgut	GTLDVMPYLATTAK LLALCGLDTVEALTLVPR GTLDVMPYLATTAK DFLSIYQEK ASFFHTDYPAGR LLALCGLDTVEALTLVPR DEADQFYANPMSWIR	scaffold01672	Novel	Annotated
24	seq935_RP	TTACGCATTGTACTCTGGATCG	IOB_NIMR_AST0010.2	77967707
25	seq339_FP	GTGCTGATCCGTGTTTTTC	IOB_NIMR_AST0011.1	77967708	Novel	Midgut	EAPILDASVVLAGEAER EAPILDASVVLAGEAER DHLPTITVPTK ARDHLPTITVPTK DHLPTITVPTK ARDHLPTITVPTK VDISPITGVPEEHVK VDISPITGVPEEHVKER NAMQSGTDNIHHWSIEFDNR NAMQSGTDNIHHWSIEFDNR NAMQSGTDNIHHWSIEFDNR VDFTNVDEAIAHCEK VDFTNVDEAIAHCEK VDFTNVDEAIAHCEK VDFTNVDEAIAHCEK VDFTNVDEAIAHCEK WFVDKPDIQK WFVDKPDIQK	scaffold05977	Novel	Annotated
26	seq861_FP	GAACTGACCGATAGCGAC	IOB_NIMR_AST0012.1	77967709	Novel	Midgut	YEGGREVDDFVK GFPTLYWLPK MDATANDVPSHFEVR MDATANDVPSHFEVR MDATANDVPSHFEVR MDATANDVPSHFEVR LKDEAVSIVK LAPTLEELGTK KLAPTLEELGTK KLAPTLEELGTK NFDDVVVNNGVDTLVEFYAPWCGHCK SEPVPESNDGPVK FIMKDEFSVENLQAFATELEEGSLEPYVK FIMKDEFSVENLQAFATELEEGSLEPYVK DDFQHELNEYGYDYTGDKPLVLAR DDFQHELNEYGYDYTGDKPLVLAR DDFQHELNEYGYDYTGDKPLVLAR VNFAVSAKDDFQHELNEYGYDYTGDKPLVLAR VNFAVSAKDDFQHELNEYGYDYTGDKPLVLAR NPLVVVYYAVDYVK NPLVV…	scaffold01363	Novel	Annotated
27	seq861_RP	GGGAGAGAGGGTAGGAGATTAC	IOB_NIMR_AST0012.2	77967710
28	seq861_SP	GGTGGCGAAGGAGTTTGTGG	IOB_NIMR_AST0012.3	77967711
29	seq964_FP	GGATATTAGCAACTGCGAGA	IOB_NIMR_AST0013.1	77967767	Novel	Salivary gland	GLATNNDLGVR	scaffold00953	Novel	Annotated
30	seq964_FP	GTCCAGCTCTGCTATTCACT	IOB_NIMR_AST0013.2	77967768
31	seq245_FP	GTGCTCGATTTGGACCTG	IOB_NIMR_AST0014.1	77967712	Novel	Midgut	FKDVALVETVIEQDK FNTDNYNK TLIDQAVVENEQQMK TLIDQAVVENEQQMK TLIDQAVVENEQQMK TLIDQAVVENEQQMK EVGNHLHESVPVSNDEDENRVER EVGNHLHESVPVSNDEDENRVER GYFLTGPAVFLEQALIQHALHSLYAK YLIATSEQPIAAYHR YLIATSEQPIAAYHR YLIATSEQPIAAYHRDEWIPEASLPIK VEQFVLTSPHDNK SGIG60.1 VEQFVLTSPHDNK seq334.1 VVNIVSGALNHAAAK LarIG35.1 VVNIVSGALNHAAAK SGIG63.1 VVNIVSGALNHAAAK SGIG69.1 LDLEAWFAGSGAFR SGIG68.1 KLDLEAWFAGSGAFR MGIG891.1 ELV…	scaffold03747	Novel	Annotated
32	seq245_SP	CAGGAGGTGGCCCAGCTGTCC	IOB_NIMR_AST0014.2	77967713
33	seq710_FP	CTACAAGAACGGTTTCAAGG	IOB_NIMR_AST0015.1	77967714	Novel	Midgut	TLSFIPEPVLQGK TVAISSSELGAKDTLLAYVSNR QIKTETDIWDAMQWFHDK ELLPIYRDEIVPLADIITPNQYEVELLTGK LYTHLLTGYVGNPAFLR ELADVYAGLVDNDLHK VLSIQSHVVHGHVGNK	Orthology based	Novel	Annotated
34	seq710_RP	GCTTTAGCTCTCGCTCTTGCG	IOB_NIMR_AST0015.2	77967715
35	Seq1573_FP	GCTGAGGAGAAGAGGAAG	IOB_NIMR_AST0016.1	77967716	Novel	Midgut	RLVPHPNSYFMDVK DFLHPLPAEEKR	Orthology based	Novel	Annotated
36	Seq1298_RP	CGCTCATATCGACGTACTTATC	IOB_NIMR_AST0017.2	77967717	Novel	Midgut	LarIG262 AFLKPNQTIQLTAQVDPALIGGMVVSIGDK FBIG463 AFLKPNQTIQLTAQVDPALIGGMVVSIGDKYVDMSVASK FBIG462 AFLKPNQTIQLTAQVDPALIGGMVVSIGDK seq80 YVDMSVASK seq763 YTDIITSPV MGIG790 KYTDIITSPV	scaffold01946
37	seq1833_FP	TAaGACCTGGCTGCACGATAAG	IOB_NIMR_AST0018.1	77967718	Novel	Midgut	TPQELLSGSFSK KFADVLEYWQPIR	Orthology based	Novel	Annotated
38	seq1833_RP	CTAACGGATGGGTTGCCAG	IOB_NIMR_AST0018.2	77967719
39	iTRAQseq679_FP	ATGGCCGGCGTTATCAAG	IOB_NIMR_AST0019.1	77967720	Novel	Midgut	QAPASQWAWPPANLPELK INCGQVEELIVQAENELTLAR INCGQVEELIVQAENELTLAR INCGQVEELIVQAENELTLAR INCGQVEELIVQAENELTLAR INCGQVEELIVQAENELTLAR NPHHTLTALYNK ATGLTGLNVAK	scaffold01888	Novel	Annotated
40	iTRAQseq679_RP	CTTCAACTCGGGCAGATTGGC	IOB_NIMR_AST0019.2	77967721
41	TstRP19_FP	ATGAATATACCCAATC	IOB_NIMR_AST0020.1	77967722	Novel	midgut	YVLPHVAR LCLIATFLEDGIR SLFAGVPSLGENKPK	scaffold02189	Novel	Novel
42	TstRP19_RP	TATGCTCATCCATCG	IOB_NIMR_AST0020.2	77967723
43	TstRP76_FP	ATGAGTCTGCTCAAGTTTCAC	IOB_NIMR_AST0021.1	77967724	Novel	midgut	TLQTTDPHSVPVLIIGQLR AVSCLQPAPTDTCSLYLDMAR LIQSNTTGGSESIVIVCEK QDLLASACAVAR GFGGIYGVGK AALDPPALAVLSYEPK GATETVAWVGK GIVFDTGGLSIK DCGGAAAILGGFYAAVK QNLHAVFCLAENSVGPLATRPDDIHR LYSGCTVEINNTDAEGR LVLADGVVYADR ANVILDMATLTGAQGIATGK YHGAILTNSDDWEAK TGDMLSPVPYCPELHFSEFNSAVADMK ATGYGVALLAGLFGEHSK DIANQPTVQR KPDVVHAIDSDGYTPLHK	scaffold00913	Novel	Annotated
44	TstRP76_RP	CACTTTATTCCGCTGCAC	IOB_NIMR_AST0021.2	77967725
45	hem205_FP	ATGTCGAAGATTGGAATTAAC	IOB_NIMR_AST0022.1	77967726	Novel	midgut	LISWYDNEYGYSNR AGIQLSDTFVK GILDYTEEEVVSTDFVGDCHSSIFDAK LSKPATYDQIK VPTPNVSVVDLTVRLSKPATYDQIK VPTPNVSVVDLTVR VPTPNVSVVDLTVRLSKPATYDQIK LTGMAFRVPTPNVSVVDLTVR GAAQNIIPAATGAAK GAAQNIIPAATGAAKAVGK GAAQNIIPAATGAAK DGRGAAQNIIPAATGAAK seq2.1 VINDNFGILEGLMTTVHATTATQK VINDNFGILEGLMTTVHATTATQKTVDGPSGK VVSNASCTTNCLAPLAK KVIISAPSADAPMFVVGVNLDAYEPSMK ASAHLEGGAK ASAHLEGGAKK AGAEYVVESTGVFTTTDKASAHLEGGAK AGAEYVVE…	scaffold01545	Novel	Annotated
46	hem205_RP	TTAATCCTTGGTCTGCATGTAC	IOB_NIMR_AST0022.2	77967727
[truncated: 49 more rows]

[truncated: 1 more sheets: Table S5.11]
