# Supplementary material for: Integrating transcriptomic and proteomic data for accurate assembly and annotation of genomes
Source: HighWire-hosted journal article supplement (doi:10.1101/gr.201368.115), 2016-11-15
Supplement: Supplemental_Table_S6.xlsx [file Supplemental_Table_S6.xlsx]

## Sheet: Summary
Supplemental Table S6.1 - A summary of results from 16 genome analysis
Prasad et al., 2016. Integrating transcriptomic and proteomic data for accurate assembly and annotation of genomes
		Summary from 'Missed annotations' sheet
Organism	Genome Size (bp)	GeneCount	Revision of genome assembly across 16 Anopheline species
			Missed genome annotation		Revised genome annotation		Annotated		Genome scaffold rearrangement	Missing orthologous genomic region
			Number of examples	Examples with RNA-Seq support	Number of examples	Examples with RNA-Seq support	Number of examples	Examples with RNA-Seq support
Anopheles stephensi (Indian strain)	221324304	12350	262	219	NA	NA	NA	NA	NA	NA
Anopheles stephensi (SDA-500)	225369006	13650	68	54	113	99	77	61	2	1
Anopheles albimanus	170508315	12335	39	25	53	52	101	99	0	69
Anopheles arabiensis	246567867	13678	59	49	76	74	94	92	1	32
Anopheles atroparvus	224290125	14230	43	37	60	56	97	95	1	61
Anopheles christyi	172658580	11156	90	NA	56	NA	67	NA	2	47
Anopheles culicifacies A	202998806	14882	31	NA	95	NA	104	NA	2	30
Anopheles dirus A	216307690	13239	56	49	69	67	93	88	1	43
Anopheles epiroticus	223486714	12602	73	NA	75	NA	74	NA	1	39
Anopheles farauti	180984331	13703	49	40	79	72	91	88	0	43
Anopheles funestus	225223604	13756	40	36	105	101	90	88	1	26
Anopheles maculatus B	141894015	15046	64	NA	79	NA	59	NA	16	44
Anopheles melas	227407517	16666	60	NA	78	NA	84	NA	3	37
Anopheles merus	251805912	14415	55	47	84	79	91	87	0	32
Anopheles minimus A	201793324	13128	54	49	90	86	91	84	1	26
Anopheles quadriannulatus A	283828998	13857	65	55	72	68	89	83	1	35
Anopheles sinensis	241390279	15280	44	36	67	64	88	84	1	62
Total number of examples			1152	696	1251	818	1390	949	33	627
			Summary from 'Revised annotations' sheet
Organism	Genome Size (bp)	GeneCount	Revision of genome assembly across 16 Anopheline species
			MGA		RGA		ANT		GSR	GGR
			Missed genome annotation		Revised genome annotation		Annotated		Genome scaffold rearrangement	Missing orthologous genomic region
			Number of examples	Examples with RNA-Seq support	Number of examples	Examples with RNA-Seq support	Number of examples	Examples with RNA-Seq support
Anopheles stephensi (Indian strain)	221324304	12350	NA	NA	300	281	NA	NA	NA	NA
Anopheles stephensi (SDA-500)	225369006	13650	5	5	218	223	74	68	2	1
Anopheles albimanus	170508315	12335	16	11	134	130	120	117	2	28
Anopheles arabiensis	246567867	13678	21	19	180	173	88	84	0	11
Anopheles atroparvus	224290125	14230	13	9	158	153	105	104	1	23
Anopheles christyi	172658580	11156	40	NA	133	133	89	NA	8	30
Anopheles culicifacies A	202998806	14882	18	NA	176	NA	93	NA	2	11
Anopheles dirus A	216307690	13239	11	11	173	169	100	96	0	16
Anopheles epiroticus	223486714	12602	15	NA	178	NA	87	NA	0	20
Anopheles farauti	180984331	13703	14	13	166	163	100	99	0	20
Anopheles funestus	225223604	13756	11	11	195	198	87	82	0	7
Anopheles maculatus B	141894015	15046	39	NA	91	NA	62	NA	70	38
Anopheles melas	227407517	16666	28	NA	151	NA	85	NA	13	23
Anopheles merus	251805912	14415	18	17	179	162	87	85	1	15
Anopheles minimus A	201793324	13128	10	10	186	178	96	93	3	5
Anopheles quadriannulatus A	283828998	13857	29	29	172	163	85	83	0	14
Anopheles sinensis	241390279	15280	17	15	133	125	103	99	4	43
Total number of examples			305	150	2923	2251	1461	1010	106	305

## Sheet: Missed annotations
Supplemental Table S6.2 - Summary of missed annotations in 16 genomes
Prasad et al., 2016. Integrating transcriptomic and proteomic data for accurate assembly and annotation of genomes
Novel gene no.		AsteI2	AsteS1	AalbS1	AaraD1	AatrE1	AchrA1	AculA1	AdirW1	AepiE1	Afar1	AfunF1	AmacM1	AmelC1	AmerM1	AminM1	AquaS1	AsinS1
IOB_NIMR_0001	Category	MGA	RGA	MGA	MGA	MGA	ANT	ANT	RGA	ANT	ANT	ANT	RGA	MGA	MGA	MGA	MGA	MGA
	Transcript evidence	Yes	Yes	Yes	Yes	No	NA	NA	Yes	NA	Yes	Yes	NA	NA	No	Yes	Yes	Yes
IOB_NIMR_0002	Category	MGA	MGA	ANT	RGA	ANT	RGA	RGA	ANT	ANT	RGA	ANT	ANT	RGA	ANT	ANT	RGA	ANT
	Transcript evidence	Yes	Yes	Yes	Yes	Yes	NA	NA	Yes	NA	Yes	Yes	NA	NA	Yes	Yes	Yes	Yes
IOB_NIMR_0003	Category	MGA	MGA	RGA	RGA	ANT	RGA	RGA	ANT	RGA	MGA	RGA	GSR	RGA	ANT	RGA	RGA	ANT
	Transcript evidence	Yes	Yes	YES	Yes	Yes	NA	NA	Yes	NA	yes	yes	NA	NA	yes	yes	yes	yes
IOB_NIMR_0004	Category	MGA	ANT	MGA	MGA	MGA	MGA	ANT	MGA	MGA	MGA	RGA	ANT	RGA	RGA	RGA	MGA	MGA
	Transcript evidence	Yes	Yes	No	No	No	NA	NA	No	NA	No	Yes	NA	NA	Yes	Yes	No	Yes
IOB_NIMR_0005	Category	MGA	MGA	ANT	MGA	MGA	MGA	ANT	MGA	MGA	MGA	RGA	MGA	MGA	MGA	ANT	MGA	RGA
	Transcript evidence	Yes	Yes	Yes	Yes	Yes	NA	NA	Yes	NA	Yes	Yes	NA	NA	Yes	Yes	Yes	Yes
IOB_NIMR_0006	Category	MGA	ANT	GGR	MGA	ANT	MGA	ANT	RGA	MGA	RGA	ANT	GGR	RGA	RGA	ANT	MGA	ANT
	Transcript evidence	Yes	Yes		No	Yes	NA	NA	Yes	NA	Yes	Yes		NA	Yes	Yes	Yes	Yes
IOB_NIMR_0007	Category	MGA	ANT	GGR	RGA	GGR	GGR	RGA	GGR	GGR	GGR	RGA	ANT	GGR	GGR	RGA	GGR	GGR
	Transcript evidence	Yes	Yes		Yes			NA				Yes	NA			Yes
IOB_NIMR_0008	Category	MGA	ANT	MGA	MGA	ANT	MGA	MGA	MGA	MGA	MGA	MGA	MGA	MGA	MGA	MGA	MGA	RGA
	Transcript evidence	Yes	Yes	No	No	No	NA	NA	Yes	NA	No	Yes	NA	NA	Yes	No	No	Yes
IOB_NIMR_0009	Category	MGA	RGA	RGA	RGA	ANT	RGA	RGA	ANT	RGA	RGA	RGA	GSR	RGA	RGA	RGA	RGA	MGA
	Transcript evidence	Yes	No	Yes	Yes	Yes	NA	NA	Yes	NA	No	No	NA	NA	Yes	No	No	Yes
IOB_NIMR_0010	Category	MGA	ANT	ANT	ANT	ANT	ANT	ANT	ANT	ANT	ANT	ANT	RGA	ANT	ANT	ANT	ANT	ANT
	Transcript evidence	No	No	Yes	Yes	Yes	NA	NA	Yes	NA	No	No	NA	NA	Yes	Yes	Yes	No
IOB_NIMR_0011	Category	MGA	MGA	RGA	RGA	RGA	ANT	RGA	RGA	RGA	ANT	ANT	GSR	ANT	ANT	ANT	ANT	ANT
	Transcript evidence	Yes	Yes	Yes	Yes	Yes	NA	NA	Yes	NA	Yes	Yes	NA	NA	Yes	Yes	Yes	Yes
IOB_NIMR_0012	Category	MGA	ANT	GGR	GGR	GGR	GGR	GGR	GGR	GGR	GGR	GGR	GGR	GGR	GGR	GGR	GGR	GGR
	Transcript evidence	Yes	Yes
IOB_NIMR_0013	Category	MGA	ANT	ANT	ANT	ANT	ANT	ANT	ANT	ANT	ANT	ANT	GSR	ANT	ANT	ANT	ANT	ANT
	Transcript evidence	No	Yes	Yes	Yes	Yes	NA	NA	No	NA	Yes	Yes	NA	NA	Yes	Yes	No	Yes
IOB_NIMR_0014	Category	MGA	ANT	MGA	MGA	RGA	MGA	MGA	MGA	MGA	MGA	MGA	MGA	MGA	MGA	MGA	MGA	MGA
	Transcript evidence	No	Yes	No	No	No	NA	NA	No	NA	No	No	NA	NA	No	Yes	Yes	No
IOB_NIMR_0015	Category	MGA	ANT	ANT	ANT	ANT	ANT	ANT	ANT	ANT	ANT	ANT	ANT	ANT	ANT	RGA	ANT	ANT
	Transcript evidence	No	yes	yes	yes	Yes	NA	NA	yes	NA	yes	yes	NA	NA	yes	Yes	yes	Yes
IOB_NIMR_0016	Category	MGA	ANT	ANT	ANT	GGR	ANT	ANT	ANT	ANT	ANT	ANT	GGR	GGR	ANT	GGR	GGR	GGR
	Transcript evidence	No	yes	yes	yes		NA	NA	Yes	NA	Yes	yes			yes
IOB_NIMR_0017	Category	MGA	MGA	GGR	GGR	GGR	GGR	GGR	GGR	GGR	GGR	GGR	GGR	GGR	GGR	GGR	GGR	GGR
	Transcript evidence	Yes	yes
IOB_NIMR_0018	Category	MGA	RGA	GGR	GGR	GGR	GGR	GGR	GGR	GGR	GGR	GGR	MGA	GGR	GGR	GGR	GGR	GGR
	Transcript evidence	Yes	no										NA
IOB_NIMR_0019	Category	MGA	MGA	GGR	GGR	GGR	GGR	GGR	GGR	GGR	GGR	GGR	MGA	GGR	GGR	GGR	GGR	GGR
	Transcript evidence	Yes	yes										NA
IOB_NIMR_0020	Category	MGA	RGA	GGR	GGR	GGR	GGR	GGR	GGR	GGR	GGR	GGR	MGA	GGR	GGR	GGR	GGR	GGR
	Transcript evidence	Yes	Yes										NA
IOB_NIMR_0021	Category	MGA	ANT	GGR	ANT	GGR	MGA	RGA	RGA	RGA	RGA	ANT	GSR	ANT	RGA	GSR	GGR	GGR
	Transcript evidence	Yes	Yes		Yes		NA	NA	No	NA	Yes	Yes	NA	NA	Yes	Yes
IOB_NIMR_0022	Category	MGA	RGA	GGR	RGA	RGA	RGA	RGA	MGA	RGA	RGA	RGA	RGA	RGA	RGA	RGA	GGR	GGR
	Transcript evidence	Yes	Yes		Yes	No	NA	NA	Yes	NA	Yes	Yes	NA	NA	Yes	Yes
IOB_NIMR_0023	Category	MGA	ANT	MGA	ANT	ANT	RGA	ANT	ANT	RGA	ANT	RGA	GGR	MGA	RGA	MGA	RGA	ANT
	Transcript evidence	No	No	Yes	Yes	Yes	NA	NA	Yes	NA	Yes	Yes		NA	Yes	Yes	Yes	Yes
IOB_NIMR_0024	Category	MGA	RGA	GGR	MGA	MGA	MGA	RGA	MGA	MGA	GGR	MGA	MGA	MGA	MGA	MGA	MGA	GGR
	Transcript evidence	Yes	Yes		No	Yes	NA	NA	Yes	NA		Yes	NA	NA	No	Yes	No
IOB_NIMR_0025	Category	MGA	MGA	RGA	RGA	RGA	MGA	GSR	GSR	MGA	MGA	RGA	MGA	MGA	RGA	MGA	MGA	RGA
	Transcript evidence	Yes	Yes	Yes	Yes	Yes	NA	NA	Yes	NA	Yes	Yes	NA	NA	Yes	Yes	Yes	Yes
IOB_NIMR_0026	Category	MGA	RGA	RGA	RGA	RGA	ANT	RGA	ANT	ANT	ANT	RGA	RGA	RGA	RGA	RGA	RGA	RGA
	Transcript evidence	No	no	yes	No	yes	NA	NA	yes	NA	yes	Yes	NA	NA	Yes	Yes	no	No
IOB_NIMR_0027	Category	MGA	RGA	RGA	RGA	RGA	RGA	RGA	RGA	RGA	RGA	RGA	RGA	RGA	RGA	RGA	RGA	RGA
	Transcript evidence	Yes	Yes	Yes	Yes	Yes	NA	NA	Yes	NA	Yes	Yes	NA	NA	Yes	Yes	Yes	Yes
IOB_NIMR_0028	Category	MGA	RGA	RGA	RGA	RGA	RGA	RGA	RGA	RGA	RGA	RGA	RGA	MGA	RGA	RGA	RGA	RGA
	Transcript evidence	Yes	Yes	Yes	Yes	Yes	NA	NA	Yes	NA	Yes	Yes	NA	NA	No	Yes	Yes	Yes
IOB_NIMR_0029	Category	MGA	ANT	GGR	ANT	ANT	GGR	ANT	GGR	GGR	GGR	GGR	ANT	GGR	GGR	ANT	GGR	GGR
	Transcript evidence	No	Yes		yes			NA					NA			yes
IOB_NIMR_0030	Category	MGA	RGA	GGR	GGR	GGR	GGR	GGR	GGR	GGR	ANT	RGA	GGR	GGR	RGA	GGR	RGA	GGR
	Transcript evidence	Yes	Yes								No	No			Yes		Yes
IOB_NIMR_0031	Category	MGA	RGA	RGA	RGA	RGA	RGA	RGA	RGA	RGA	RGA	RGA	RGA	RGA	RGA	RGA	RGA	RGA
	Transcript evidence	yes	Yes	Yes	Yes	Yes	NA	NA	Yes	NA	Yes	Yes	NA	NA	Yes	Yes	Yes	Yes
IOB_NIMR_0032	Category	MGA	ANT	MGA	MGA	RGA	MGA	RGA	MGA	MGA	ANT	RGA	RGA	ANT	ANT	MGA	MGA	ANT
	Transcript evidence	yes	Yes	Yes	Yes	Yes	NA	NA	Yes	NA	Yes	Yes	NA	NA	Yes	Yes	Yes	Yes
IOB_NIMR_0033	Category	MGA	ANT	MGA	RGA	RGA	MGA	ANT	MGA	MGA	RGA	ANT	RGA	ANT	RGA	MGA	MGA	RGA
	Transcript evidence	yes	Yes	Yes	Yes	Yes	NA	NA	Yes	NA	Yes	Yes	NA	NA	Yes	Yes	Yes	Yes
IOB_NIMR_0034	Category	MGA	RGA	RGA	RGA	RGA	RGA	ANT	RGA	RGA	RGA	RGA	GSR	RGA	RGA	RGA	RGA	RGA
	Transcript evidence	yes	Yes	Yes	Yes	Yes	NA	NA	Yes	NA	Yes	Yes	NA	NA	Yes	Yes	Yes	Yes
IOB_NIMR_0035	Category	MGA	MGA	GGR	ANT	GGR	MGA	GGR	MGA	MGA	RGA	MGA	ANT	ANT	ANT	MGA	ANT	GGR
	Transcript evidence	yes	Yes		Yes		NA		Yes	NA	Yes	Yes	NA	NA	Yes	Yes	Yes
IOB_NIMR_0036	Category	MGA	RGA	GGR	GGR	GGR	ANT	ANT	GGR	GGR	GGR	MGA	RGA	GGR	GGR	ANT	GGR	GGR
	Transcript evidence	yes	Yes		No		NA	NA				Yes	NA			Yes
IOB_NIMR_0037	Category	MGA	MGA	RGA	RGA	RGA	RGA	RGA	RGA	RGA	RGA	RGA	GGR	RGA	RGA	RGA	RGA	RGA
	Transcript evidence	Yes	Yes	Yes	Yes	Yes	NA	NA	Yes	NA	Yes	Yes		NA	Yes	Yes	Yes	Yes
IOB_NIMR_0038	Category	MGA	MGA	RGA	MGA	ANT	RGA	ANT	RGA	MGA	MGA	MGA	ANT	ANT	ANT	RGA	MGA	MGA
	Transcript evidence	Yes	Yes	No	Yes	Yes	NA	NA	Yes	NA	Yes	Yes	NA	NA	Yes	Yes	Yes	Yes
IOB_NIMR_0039	Category	MGA	RGA	GGR	MGA	GGR	RGA	RGA	RGA	MGA	RGA	RGA	GSR	RGA	RGA	RGA	RGA	GGR
	Transcript evidence	Yes	Yes		Yes		NA	NA	Yes	NA	Yes	Yes	NA	NA	Yes	Yes	Yes
IOB_NIMR_0040	Category	MGA	RGA	ANT	ANT	ANT	RGA	RGA	ANT	RGA	ANT	RGA	ANT	ANT	ANT	RGA	RGA	RGA
	Transcript evidence	Yes	Yes	Yes	Yes	Yes	NA	NA	Yes	NA	Yes	Yes	NA	NA	No	Yes	Yes	Yes
IOB_NIMR_0041	Category	MGA	RGA	ANT	ANT	ANT	ANT	ANT	ANT	ANT	ANT	ANT	GGR	ANT	ANT	ANT	ANT	ANT
	Transcript evidence	Yes	Yes	Yes	Yes	Yes	NA	NA	Yes	NA	Yes	Yes		NA	Yes	Yes	Yes	Yes
IOB_NIMR_0042	Category	MGA	GSR	RGA	MGA	ANT	GSR	ANT	RGA	ANT	RGA	GSR	ANT	ANT	ANT	ANT	ANT	ANT
	Transcript evidence	Yes	No	Yes	Yes	Yes	NA	NA	Yes	NA	Yes	Yes	NA	NA	Yes	Yes	Yes	Yes
IOB_NIMR_0043	Category	MGA	ANT	ANT	ANT	ANT	ANT	RGA	ANT	ANT	ANT	ANT	ANT	ANT	ANT	ANT	ANT	ANT
	Transcript evidence	Yes	Yes	Yes	Yes	Yes	NA	NA	Yes	NA	Yes	Yes	NA	NA	Yes	Yes	Yes	Yes
IOB_NIMR_0044	Category	MGA	RGA	ANT	ANT	ANT	ANT	ANT	ANT	ANT	ANT	ANT	GGR	MGA	ANT	ANT	ANT	ANT
	Transcript evidence	No	No	Yes	Yes	Yes	NA	NA	Yes	NA	Yes	Yes	NA	NA	Yes	Yes	Yes	Yes
IOB_NIMR_0045	Category	MGA	MGA	GGR	MGA	ANT	MGA	RGA	MGA	RGA	RGA	MGA	RGA	RGA	MGA	MGA	MGA	MGA
	Transcript evidence	Yes	yes		Yes	Yes	NA	NA	Yes	NA	Yes	Yes	NA	NA	Yes	Yes	Yes	Yes
IOB_NIMR_0046	Category	MGA	MGA	MGA	MGA	ANT	MGA	MGA	MGA	MGA	MGA	MGA	MGA	MGA	MGA	MGA	ANT	ANT
	Transcript evidence	Yes	Yes	Yes	Yes	Yes	NA	NA	Yes	NA	Yes	Yes	NA	NA	Yes	Yes	Yes	Yes
IOB_NIMR_0047	Category	MGA	ANT	ANT	ANT	ANT	ANT	RGA	ANT	ANT	ANT	ANT	ANT	ANT	ANT	ANT	ANT	RGA
	Transcript evidence	Yes	Yes	Yes	Yes	Yes	NA	NA	Yes	NA	Yes	Yes	NA	NA	Yes	Yes	Yes	Yes
IOB_NIMR_0048	Category	MGA	RGA	GGR	GGR	GGR	GGR	GGR	GGR	GGR	GGR	GGR	GGR	GGR	GGR	GGR	GGR	GGR
	Transcript evidence	yes	yes
IOB_NIMR_0049	Category	MGA	RGA	GGR	ANT	ANT	MGA	GGR	ANT	MGA	MGA	ANT	MGA	MGA	MGA	MGA	MGA	ANT
	Transcript evidence	No	Yes		Yes	Yes	NA		Yes	NA	Yes	Yes	NA	NA	Yes	Yes	No	Yes
IOB_NIMR_0050	Category	MGA	RGA	RGA	ANT	ANT	MGA	ANT	ANT	ANT	ANT	RGA	ANT	ANT	ANT	ANT	ANT	ANT
	Transcript evidence	yes	Yes	Yes	Yes	Yes	NA	NA	Yes	NA	Yes	Yes	NA	NA	Yes	Yes	Yes	Yes
IOB_NIMR_0051	Category	MGA	RGA	ANT	ANT	ANT	ANT	ANT	ANT	ANT	ANT	ANT	GSR	ANT	ANT	ANT	ANT	ANT
	Transcript evidence	yes	Yes	Yes	Yes	Yes	NA	NA	Yes	NA	Yes	Yes	NA	NA	Yes	Yes	Yes	Yes
IOB_NIMR_0052	Category	MGA	MGA	GGR	ANT	GGR	GGR	RGA	GGR	GGR	GGR	ANT	ANT	GGR	MGA	ANT	ANT	GGR
	Transcript evidence	yes	Yes		Yes			NA				Yes	NA		Yes	No	No
IOB_NIMR_0053	Category	MGA	RGA	GGR	ANT	ANT	ANT	ANT	GGR	MGA	ANT	ANT	ANT	MGA	ANT	ANT	ANT	GGR
	Transcript evidence	yes	Yes		Yes	Yes	NA	NA		NA	Yes	Yes	NA	NA	Yes	Yes	Yes
IOB_NIMR_0054	Category	MGA	ANT	GGR	GGR	GGR	GGR	GGR	GGR	GGR	GGR	GGR	GGR	GGR	GGR	GGR	GGR	GGR
	Transcript evidence	yes	Yes
IOB_NIMR_0055	Category	MGA	MGA	GGR	GGR	GGR	GGR	GGR	GGR	GGR	GGR	GGR	GGR	GGR	GGR	GGR	GGR	GGR
	Transcript evidence	yes	No
IOB_NIMR_0056	Category	MGA	ANT	GGR	GGR	GGR	GGR	GGR	GGR	GGR	GGR	GGR	GGR	GGR	GGR	GGR	GGR	GGR
	Transcript evidence	Yes	No
IOB_NIMR_0057	Category	MGA	ANT	GGR	GGR	GGR	GGR	GGR	GGR	GGR	GGR	GGR	GGR	GGR	GGR	GGR	GGR	GGR
	Transcript evidence	yes	Yes
IOB_NIMR_0058	Category	MGA	ANT	GGR	GGR	GGR	GGR	GGR	GGR	GGR	GGR	GGR	GGR	GGR	GGR	GGR	GGR	GGR
	Transcript evidence	yes	Yes
IOB_NIMR_0059	Category	MGA	ANT	ANT	RGA	ANT	RGA	RGA	RGA	RGA	RGA	RGA	MGA	RGA	RGA	RGA	RGA	RGA
	Transcript evidence	yes	Yes	Yes	Yes	Yes	NA	NA	Yes	NA	Yes	Yes	NA	NA	Yes	Yes	Yes	Yes
IOB_NIMR_0060	Category	MGA	RGA	ANT	RGA	RGA	RGA	RGA	ANT	RGA	ANT	RGA	ANT	ANT	RGA	RGA	ANT	ANT
	Transcript evidence	yes	Yes	Yes	Yes	Yes	NA	NA	Yes	NA	Yes	Yes	NA	NA	Yes	Yes	Yes	Yes
IOB_NIMR_0061	Category	MGA	RGA	ANT	RGA	ANT	RGA	RGA	RGA	ANT	RGA	RGA	RGA	ANT	RGA	RGA	RGA	ANT
	Transcript evidence	yes	Yes	Yes	Yes	Yes	NA	NA	Yes	NA	Yes	Yes	NA	NA	Yes	Yes	Yes	Yes
IOB_NIMR_0062	Category	mga	MGA	GGR	GGR	GGR	GGR	GGR	GGR	GGR	GGR	GGR	GGR	GGR	GGR	GGR	GGR	GGR
	Transcript evidence	Yes	Yes
IOB_NIMR_0063	Category	MGA	RGA	ANT	ANT	ANT	ANT	RGA	ANT	ANT	ANT	ANT	ANT	ANT	ANT	RGA	ANT	ANT
	Transcript evidence	Yes	YES	YES	YES	YES	NA	NA	YES	NA	YES	YES	NA	NA	YES	YES	YES	YES
IOB_NIMR_0064	Category	MGA	ANT	ANT	ANT	ANT	MGA	ANT	ANT	ANT	ANT	ANT	ANT	ANT	ANT	ANT	ANT	ANT
	Transcript evidence	Yes	YES	YES	YES	YES	NA	NA	YES	NA	YES	YES	NA	NA	YES	YES	YES	YES
IOB_NIMR_0065	Category	MGA	RGA	GGR	GGR	GGR	GGR	GGR	GGR	GGR	GGR	GGR	GGR	GGR	GGR	GGR	GGR	GGR
	Transcript evidence	Yes	YES
IOB_NIMR_0066	Category	MGA	ANT	GGR	ANT	GGR	ANT	ANT	ANT	ANT	MGA	ANT	RGA	MGA	RGA	ANT	ANT	ANT
	Transcript evidence	Yes	YES		YES		NA	NA	YES	NA	YES	YES	NA	NA	YES	YES	YES	YES
IOB_NIMR_0067	Category	MGA	ANT	ANT	ANT	RGA	ANT	RGA	ANT	ANT	RGA	ANT	ANT	ANT	RGA	ANT	ANT	ANT
	Transcript evidence	Yes	YES	YES	YES	YES	NA	NA	YES	NA	YES	YES	NA	NA	YES	YES	YES	YES
IOB_NIMR_0068	Category	MGA	MGA	GGR	ANT	ANT	ANT	RGA	ANT	ANT	ANT	GGR	GGR	ANT	ANT	ANT	ANT	GGR
	Transcript evidence	Yes	YES		YES	YES	NA	NA	YES	NA	YES			NA	YES	YES	YES
IOB_NIMR_0069	Category	MGA	ANT	ANT	ANT	ANT	RGA	ANT	ANT	ANT	ANT	ANT	GSR	MGA	ANT	ANT	ANT	ANT
	Transcript evidence	Yes	YES	YES	YES	YES	NA	NA	YES	NA	YES	YES	NA	NA	YES	YES	YES	YES
IOB_NIMR_0070	Category	MGA	ANT	GGR	GGR	GGR	GGR	GGR	GGR	GGR	GGR	GGR	ANT	GGR	GGR	GGR	GGR	GGR
	Transcript evidence	Yes	Yes										NA
IOB_NIMR_0071	Category	MGA	ANT	ANT	ANT	ANT	MGA	RGA	ANT	ANT	ANT	ANT	ANT	GGR	ANT	ANT	ANT	ANT
	Transcript evidence	Yes	Yes	Yes	Yes	Yes	NA	NA	Yes	NA	Yes	Yes	NA		Yes	Yes	Yes	Yes
IOB_NIMR_0072	Category	MGA	ANT	GGR	ANT	GGR	ANT	ANT	GGR	GGR	GGR	ANT	ANT	ANT	RGA	ANT	ANT	GGR
	Transcript evidence	Yes	Yes		yes		NA	NA				Yes	NA	NA	Yes	Yes	yes
IOB_NIMR_0073	Category	MGA	ANT	ANT	RGA	ANT	MGA	ANT	ANT	RGA	ANT	ANT	RGA	RGA	ANT	RGA	ANT	ANT
	Transcript evidence	Yes	Yes	Yes	Yes	Yes	NA	NA	Yes	NA	Yes	Yes	NA	NA	Yes	Yes	Yes	Yes
IOB_NIMR_0074	Category	MGA	MGA	MGA	ANT	MGA	MGA	GGR	ANT	MGA	GGR	MGA	MGA	MGA	MGA	GGR	GGR	GGR
	Transcript evidence	Yes	Yes	No	Yes	Yes	NA		No	NA		No	NA	NA	No
IOB_NIMR_0075	Category	MGA	MGA	ANT	ANT	MGA	ANT	ANT	ANT	ANT	ANT	ANT	ANT	ANT	ANT	ANT	ANT	ANT
	Transcript evidence	Yes	Yes	Yes	Yes	Yes	NA	NA	Yes	NA	Yes	Yes	NA	NA	Yes	Yes	Yes	Yes
IOB_NIMR_0076	Category	MGA	RGA	GGR	RGA	RGA	ANT	ANT	RGA	MGA	ANT	ANT	RGA	MGA	ANT	RGA	ANT	GGR
	Transcript evidence	Yes	Yes		Yes	Yes	NA	NA	Yes	NA	Yes	Yes	NA	NA	Yes	Yes	Yes
IOB_NIMR_0077	Category	MGA	MGA	ANT	MGA	ANT	MGA	ANT	MGA	MGA	ANT	ANT	ANT	ANT	ANT	MGA	MGA	RGA
	Transcript evidence	Yes	Yes	Yes	Yes	Yes	NA	NA	Yes	NA	Yes	Yes	NA	NA	Yes	Yes	Yes	Yes
IOB_NIMR_0078	Category	MGA	RGA	ANT	ANT	ANT	ANT	RGA	ANT	ANT	RGA	RGA	RGA	ANT	ANT	ANT	MGA	ANT
	Transcript evidence	Yes	Yes	Yes	Yes	Yes	NA	NA	No	NA	Yes	Yes	NA	NA	Yes	Yes	Yes	Yes
IOB_NIMR_0079	Category	MGA	RGA	ANT	RGA	MGA	MGA	RGA	MGA	RGA	RGA	RGA	RGA	RGA	RGA	RGA	MGA	ANT
	Transcript evidence	Yes	Yes	Yes	Yes	Yes	NA	NA	Yes	NA	Yes	Yes	NA	NA	Yes	Yes	Yes	Yes
IOB_NIMR_0080	Category	MGA	MGA	ANT	MGA	MGA	MGA	MGA	MGA	MGA	ANT	MGA	ANT	ANT	ANT	MGA	MGA	MGA
	Transcript evidence	No	Yes	Yes	Yes	Yes	NA	NA	Yes	NA	Yes	Yes	NA	NA	Yes	Yes	Yes	Yes
IOB_NIMR_0081	Category	MGA	MGA	MGA	MGA	MGA	MGA	RGA	MGA	MGA	RGA	MGA	MGA	MGA	MGA	MGA	RGA	RGA
	Transcript evidence	Yes	Yes	Yes	Yes	Yes	NA	NA	Yes	NA	Yes	Yes	NA	NA	Yes	Yes	Yes	Yes
IOB_NIMR_0082	Category	MGA	MGA	MGA	RGA	RGA	RGA	ANT	RGA	RGA	MGA	RGA	MGA	RGA	RGA	RGA	RGA	MGA
	Transcript evidence	Yes	Yes	Yes	Yes	Yes	NA	NA	Yes	NA	Yes	Yes	NA	NA	Yes	Yes	Yes	Yes
IOB_NIMR_0083	Category	MGA	RGA	RGA	RGA	RGA	RGA	RGA	ANT	RGA	ANT	ANT	RGA	RGA	ANT	ANT	ANT	ANT
	Transcript evidence	YES	YES	YES	YES	YES	NA	NA	YES	NA	YES	YES	NA	NA	YES	YES	YES	YES
IOB_NIMR_0084	Category	MGA	ANT	ANT	ANT	ANT	ANT	ANT	MGA	ANT	ANT	ANT	GGR	ANT	ANT	ANT	ANT	ANT
	Transcript evidence	YES	YES	YES	YES	YES	NA	NA	YES	NA	YES	YES		NA	YES	YES	YES	YES
IOB_NIMR_0085	Category	MGA	ANT	ANT	RGA	ANT	ANT	ANT	ANT	ANT	ANT	ANT	GSR	RGA	RGA	ANT	RGA	ANT
	Transcript evidence	YES	YES	YES	YES	YES	NA	NA	YES	NA	YES	YES	NA	NA	YES	NO	NO	YES
IOB_NIMR_0086	Category	MGA	RGA	GGR	GGR	GGR	GGR	GGR	GGR	MGA	GGR	ANT	ANT	ANT	ANT	ANT	MGA	GGR
	Transcript evidence	YES	NO							NA		YES	NA	NA	YES	YES	YES
IOB_NIMR_0087	Category	MGA	ANT	ANT	ANT	ANT	ANT	ANT	RGA	ANT	ANT	RGA	GSR	GSR	ANT	ANT	ANT	GGR
	Transcript evidence	Yes	Yes	Yes	Yes	Yes	NA	NA	Yes	NA	Yes	YEs	NA	NA	YES	Yes	Yes
IOB_NIMR_0088	Category	MGA	RGA	ANT	RGA	ANT	MGA	RGA	MGA	ANT	RGA	RGA	RGA	ANT	RGA	RGA	RGA	RGA
	Transcript evidence	Yes	Yes	Yes	Yes	YEs	NA	NA	Yes	NA	Yes	Yes	NA	NA	Yes	Yes	Yes	YEs
IOB_NIMR_0089	Category	MGA	RGA	RGA	RGA	RGA	MGA	ANT	RGA	RGA	RGA	MGA	MGA	RGA	RGA	MGA	RGA	MGA
	Transcript evidence	Yes	Yes	Yes	Yes	Yes	NA	NA	Yes	NA	Yes	Yes	NA	NA	Yes	Yes	Yes	Yes
IOB_NIMR_0090	Category	MGA	RGA	RGA	MGA	RGA	MGA	ANT	MGA	RGA	RGA	MGA	MGA	RGA	RGA	MGA	MGA	RGA
	Transcript evidence	Yes	Yes	Yes	Yes	Yes	NA	NA	Yes	NA	Yes	Yes	NA	NA	Yes	Yes	Yes	Yes
IOB_NIMR_0091	Category	MGA	RGA	GGR	GGR	GGR	GGR	RGA	GGR	GGR	GGR	RGA	GGR	GGR	GGR	GGR	GGR	GGR
	Transcript evidence	Yes	Yes					NA				Yes
IOB_NIMR_0092	Category	MGA	MGA	RGA	RGA	MGA	ANT	ANT	RGA	MGA	MGA	ANT	RGA	ANT	MGA	RGA	ANT	RGA
	Transcript evidence	Yes	Yes	Yes	Yes	Yes	NA	NA	Yes	NA	Yes	Yes	NA	NA	Yes	Yes	Yes	Yes
IOB_NIMR_0093	Category	MGA	RGA	ANT	ANT	ANT	MGA	RGA	ANT	ANT	RGA	RGA	RGA	RGA	ANT	ANT	ANT	ANT
	Transcript evidence	No	Yes	Yes	Yes	Yes	NA	NA	Yes	NA	Yes	Yes	NA	NA	Yes	Yes	Yes	Yes
IOB_NIMR_0094	Category	MGA	MGA	GGR	MGA	GGR	GGR	ANT	MGA	MGA	RGA	MGA	RGA	ANT	RGA	MGA	RGA	RGA
	Transcript evidence	Yes	Yes		Yes			NA	Yes	NA	Yes	Yes	NA	NA	Yes	Yes	Yes	Yes
IOB_NIMR_0095	Category	MGA	RGA	GGR	ANT	ANT	MGA	RGA	ANT	MGA	MGA	RGA	MGA	MGA	MGA	MGA	MGA	ANT
	Transcript evidence	Yes	Yes		Yes	Yes	NA	NA	Yes	NA	Yes	Yes	NA	NA	No	Yes	Yes	Yes
IOB_NIMR_0096	Category	MGA	MGA	ANT	MGA	ANT	MGA	RGA	MGA	MGA	ANT	MGA	RGA	RGA	RGA	MGA	MGA	MGA
	Transcript evidence	Yes	No	Yes	Yes	Yes	NA	NA	No	NA	Yes	Yes	NA	NA	Yes	Yes	Yes	Yes
IOB_NIMR_0097	Category	MGA	MGA	GGR	GGR	GGR	GGR	ANT	GGR	GGR	GGR	MGA	GGR	GGR	GGR	GGR	GGR	GGR
	Transcript evidence	No	Yes					NA				No
IOB_NIMR_0098	Category	MGA	RGA	GGR	RGA	GGR	MGA	ANT	MGA	MGA	MGA	MGA	RGA	MGA	MGA	RGA	RGA	MGA
	Transcript evidence	Yes	Yes		Yes		NA	NA	No	NA	Yes	Yes	NA	NA	Yes	Yes	Yes	No
IOB_NIMR_0099	Category	MGA	ANT	GGR	ANT	GGR	RGA	ANT	ANT	RGA	RGA	MGA	GGR	ANT	RGA	RGA	ANT	ANT
	Transcript evidence	Yes	Yes		Yes		NA	NA	Yes	NA	Yes	Yes		NA	Yes	Yes	Yes	Yes
IOB_NIMR_0100	Category	MGA	MGA	MGA	MGA	ANT	MGA	RGA	ANT	RGA	ANT	MGA	RGA	ANT	ANT	MGA	MGA	ANT
	Transcript evidence	Yes	No	No	Yes	Yes	NA	NA	Yes	NA	Yes	Yes	NA	NA	Yes	Yes	Yes	Yes
IOB_NIMR_0101	Category	MGA	RGA	ANT	ANT	ANT	RGA	RGA	MGA	ANT	RGA	ANT	ANT	ANT	ANT	RGA	ANT	ANT
	Transcript evidence	Yes	Yes	Yes	Yes	Yes	NA	NA	No	NA	Yes	Yes	NA	NA	Yes	Yes	Yes	Yes
IOB_NIMR_0102	Category	MGA	RGA	MGA	ANT	MGA	RGA	ANT	ANT	ANT	ANT	ANT	ANT	MGA	ANT	ANT	ANT	MGA
	Transcript evidence	Yes	Yes	Yes	Yes	Yes	NA	NA	Yes	NA	Yes	Yes	NA	NA	Yes	Yes	Yes	Yes
IOB_NIMR_0103	category	MGA	ANT	ANT	RGA	MGA	ANT	ANT	ANT	ANT	ANT	ANT	ANT	ANT	ANT	ANT	RGA	ANT
	Transcript evidence	No	Yes	Yes	Yes	Yes	NA	NA	Yes	NA	yes	YEs	NA	NA	YEs	Yes	Yes	Yes
IOB_NIMR_0104	Category	MGA	RGA	MGA	MGA	ANT	MGA	MGA	MGA	MGA	ANT	MGA	GGR	MGA	MGA	RGA	MGA	MGA
	Transcript evidence	Yes	Yes	No	Yes	Yes	NA	NA	yes	NA	Yes	Yes		NA	Yes	Yes	Yes	Yes
IOB_NIMR_0105	Category	MGA	ANT	GGR	RGA	GGR	GGR	GGR	MGA	MGA	MGA	GGR	GGR	GGR	MGA	GGR	MGA	GGR
	Transcript evidence	no	NO		Yes				Yes	NA	Yes				Yes		Yes
IOB_NIMR_0106	Category	MGA	RGA	ANT	ANT	ANT	ANT	RGA	RGA	RGA	RGA	RGA	RGA	ANT	RGA	MGA	RGA	ANT
	Transcript evidence	Yes	Yes	Yes	Yes	Yes	NA	NA	Yes	NA	Yes	Yes	NA	NA	Yes	Yes	Yes	Yes
IOB_NIMR_0107	Category	MGA	RGA	ANT	ANT	MGA	ANT	RGA	ANT	MGA	RGA	ANT	RGA	RGA	MGA	ANT	ANT	MGA
	Transcript evidence	Yes	Yes	Yes	Yes	Yes	NA	NA	Yes	NA	Yes	Yes	NA	NA	Yes	Yes	Yes	Yes
IOB_NIMR_0108	Category	MGA	RGA	ANT	ANT	RGA	RGA	ANT	RGA	RGA	RGA	RGA	MGA	RGA	RGA	MGA	RGA	RGA
	Transcript evidence	Yes	Yes	Yes	Yes	Yes	NA	NA	Yes	NA	Yes	Yes	NA	NA	Yes	No	Yes	Yes
IOB_NIMR_0109	Category	MGA	RGA	RGA	RGA	MGA	RGA	ANT	RGA	RGA	RGA	RGA	MGA	RGA	RGA	MGA	RGA	RGA
	Transcript evidence	Yes	Yes	Yes	Yes	Yes	NA	NA	Yes	NA	Yes	Yes	NA	NA	Yes	No	Yes	Yes
IOB_NIMR_0110	Category	MGA	RGA	RGA	ANT	ANT	RGA	ANT	RGA	RGA	RGA	RGA	RGA	RGA	RGA	RGA	ANT	RGA
	Transcript evidence	Yes	Yes	Yes	Yes	Yes	NA	NA	Yes	NA	Yes	Yes	NA	NA	Yes	Yes	Yes	Yes
IOB_NIMR_0111	Category	MGA	RGA	GGR	ANT	MGA	RGA	RGA	RGA	RGA	ANT	RGA	RGA	ANT	ANT	RGA	ANT	MGA
	Transcript evidence	Yes	Yes		Yes	Yes	NA	NA	Yes	NA	Yes	Yes	NA	NA	Yes	Yes	Yes	Yes
IOB_NIMR_0112	Category	MGA	RGA	ANT	GGR	RGA	MGA	RGA	RGA	RGA	RGA	RGA	RGA	RGA	RGA	RGA	RGA	RGA
	Transcript evidence	Yes	Yes	Yes		Yes	NA	NA	Yes	NA	Yes	Yes	NA	NA	Yes	Yes	Yes	Yes
IOB_NIMR_0113	Category	MGA	RGA	GGR	RGA	GGR	MGA	MGA	ANT	MGA	RGA	RGA	GGR	MGA	MGA	RGA	RGA	GGR
	Transcript evidence	Yes	Yes		Yes		NA	NA	Yes	NA	Yes	Yes		NA	Yes	Yes	Yes
IOB_NIMR_0114	Category	MGA	RGA	RGA	RGA	MGA	MGA	RGA	MGA	MGA	MGA	RGA	GGR	ANT	RGA	RGA	RGA	ANT
	Transcript evidence	Yes	Yes	Yes	Yes	Yes	NA	NA	Yes	NA	Yes	Yes		NA	Yes	Yes	Yes	Yes
IOB_NIMR_0115	Category	MGA	RGA	GGR	RGA	GGR	GGR	MGA	GGR	MGA	GGR	ANT	ANT	RGA	RGA	ANT	MGA	GGR
	Transcript evidence	Yes	Yes		Yes			NA		NA		Yes	NA	NA	Yes	Yes	Yes
IOB_NIMR_0116	Category	MGA	RGA	GGR	GGR	GGR	GGR	MGA	GGR	GGR	MGA	GGR	GGR	GGR	GGR	GGR	GGR	GGR
	Transcript evidence	Yes	Yes				NA	NA			No
IOB_NIMR_0117	Category	MGA	RGA	ANT	ANT	GGR	GGR	MGA	ANT	MGA	GGR	ANT	ANT	MGA	ANT	RGA	MGA	GGR
	Transcript evidence	Yes	yes	Yes	Yes			NA	Yes	NA		Yes	NA	NA	Yes	Yes	Yes
IOB_NIMR_0118	Category	MGA	ANT	RGA	MGA	ANT	MGA	ANT	MGA	ANT	ANT	ANT	ANT	ANT	ANT	MGA	MGA	ANT
	Transcript evidence	Yes	Yes	Yes	Yes	Yes	NA	NA	Yes	NA	Yes	Yes	NA	NA	Yes	Yes	Yes	Yes
IOB_NIMR_0119	Category	MGA	ANT	GGR	GGR	GGR	GGR	MGA	GGR	GGR	ANT	ANT	MGA	GGR	GGR	ANT	GGR	GGR
	Transcript evidence	No	Yes					NA			Yes	Yes	NA			Yes
IOB_NIMR_0120	Category	MGA	ANT	MGA	ANT	GGR	MGA	ANT	ANT	MGA	GGR	RGA	RGA	ANT	ANT	ANT	MGA	GGR
	Transcript evidence	Yes	Yes	No	Yes		NA	NA	Yes	NA		Yes	NA	NA	Yes	Yes	No
IOB_NIMR_0121	Category	MGA	ANT	ANT	ANT	RGA	ANT	ANT	ANT	ANT	RGA	ANT	MGA	MGA	MGA	ANT	ANT	RGA
	Transcript evidence	Yes	Yes	Yes	Yes	Yes	NA	NA	Yes	NA	Yes	Yes	NA	NA	Yes	Yes	Yes	Yes
IOB_NIMR_0122	Category	MGA	RGA	ANT	ANT	ANT	GGR	ANT	RGA	MGA	ANT	RGA	GGR	ANT	RGA	RGA	ANT	ANT
	Transcript evidence	Yes	Yes	Yes	Yes	Yes		NA	Yes	NA	Yes	Yes		NA	Yes	Yes	Yes	Yes
IOB_NIMR_0123	Category	MGA	RGA	RGA	RGA	RGA	RGA	RGA	RGA	RGA	RGA	RGA	RGA	RGA	RGA	RGA	RGA	RGA
	Transcript evidence	Yes	Yes	Yes	Yes	Yes	NA	NA	Yes	NA	Yes	Yes	NA	NA	Yes	Yes	Yes	Yes
IOB_NIMR_0124	Category	MGA	MGA	GGR	MGA	GGR	ANT	ANT	GGR	MGA	GGR	RGA	RGA	MGA	MGA	MGA	MGA	GGR
	Transcript evidence	Yes	No		Yes		NA	NA		NA		Yes	NA	NA	Yes	Yes	Yes
IOB_NIMR_0125	Category	MGA	MGA	GGR	GGR	GGR	GGR	GGR	GGR	GGR	GGR	RGA	RGA	RGA	RGA	RGA	RGA	MGA
	Transcript evidence	Yes	Yes									Yes	NA	NA	Yes	Yes	Yes	Yes
IOB_NIMR_0126	Category	MGA	MGA	ANT	RGA	RGA	MGA	GSR	MGA	MGA	RGA	RGA	GSR	RGA	MGA	MGA	MGA	MGA
	Transcript evidence	Yes	Yes	Yes	Yes	Yes	NA	NA	Yes	NA	Yes	Yes	NA	NA	Yes	Yes	Yes	Yes
IOB_NIMR_0127	Category	MGA	RGA	MGA	RGA	MGA	MGA	RGA	RGA	MGA	RGA	RGA	MGA	RGA	RGA	RGA	MGA	RGA
	Transcript evidence	Yes	Yes	Yes	Yes	Yes	NA	NA	Yes	NA	Yes	Yes	NA	NA	Yes	Yes	Yes	Yes
IOB_NIMR_0128	Category	MGA	MGA	ANT	MGA	ANT	MGA	ANT	RGA	MGA	MGA	ANT	MGA	MGA	MGA	ANT	MGA	ANT
	Transcript evidence	Yes	No	Yes	Yes	Yes	NA	NA	Yes	NA	Yes	Yes	NA	NA	Yes	Yes	Yes	Yes
IOB_NIMR_0129	Category	MGA	ANT	ANT	GSR	ANT	MGA	ANT	MGA	MGA	ANT	ANT	MGA	GSR	GGR	ANT	GSR	RGA
	Transcript evidence	Yes	No	Yes	Yes	Yes	NA	NA	Yes	NA	Yes	Yes	NA	NA		Yes	Yes	Yes
IOB_NIMR_0130	Category	MGA	MGA	RGA	ANT	MGA	MGA	ANT	ANT	ANT	ANT	ANT	MGA	MGA	MGA	ANT	ANT	RGA
	Transcript evidence	Yes	Yes	Yes	Yes	Yes	NA	NA	Yes	NA	Yes	Yes	NA	NA	Yes	Yes	Yes	Yes
IOB_NIMR_0131	Category	MGA	MGA	ANT	MGA	ANT	GSR	ANT	MGA	GSR	MGA	ANT	GSR	GSR	MGA	ANT	MGA	ANT
	Transcript evidence	Yes	No	Yes	Yes	yes	NA	NA	Yes	NA	Yes	Yes	NA	NA	Yes	Yes	Yes	Yes
IOB_NIMR_0132	Category	MGA	GSR	ANT	MGA	GSR	GGR	ANT	GGR	GGR	GGR	GGR	GGR	GGR	GGR	ANT	GGR	ANT
	Transcript evidence	Yes		Yes	Yes	Yes		NA								Yes		Yes
IOB_NIMR_0133	Category	MGA	ANT	GGR	ANT	GGR	ANT	ANT	ANT	ANT	ANT	ANT	ANT	ANT	ANT	ANT	ANT	GGR
	Transcript evidence	No	Yes		No		NA	NA	Yes	NA	Yes	Yes	NA	NA	Yes	Yes	Yes
IOB_NIMR_0134	Category	MGA	MGA	ANT	ANT	ANT	MGA	RGA	ANT	ANT	ANT	ANT	RGA	ANT	ANT	ANT	ANT	ANT
	Transcript evidence	Yes	Yes	Yes	Yes	Yes	NA	NA	Yes	NA	Yes	Yes	NA	NA	Yes	Yes	Yes	Yes
IOB_NIMR_0135	Category	MGA	ANT	ANT	ANT	ANT	ANT	ANT	ANT	ANT	ANT	ANT	MGA	ANT	ANT	ANT	ANT	ANT
	Transcript evidence	Yes	Yes	Yes	Yes	Yes	NA	NA	Yes	NA	Yes	Yes	NA	NA	Yes	Yes	Yes	Yes
IOB_NIMR_0136	Category	MGA	ANT	RGA	RGA	MGA	RGA	MGA	ANT	RGA	MGA	RGA	MGA	MGA	MGA	RGA	RGA	GGR
	Transcript evidence	Yes	Yes	Yes	Yes	Yes	NA	NA	Yes	NA	Yes	Yes	NA	NA	Yes	Yes	Yes
IOB_NIMR_0137	Category	MGA	RGA	GGR	GGR	GGR	GGR	GGR	GGR	GGR	GGR	GGR	GGR	GGR	GGR	GGR	GGR	GGR
	Transcript evidence	Yes	Yes
IOB_NIMR_0138	Category	MGA	ANT	GGR	GGR	GGR	GGR	GGR	GGR	GGR	GGR	GGR	GGR	GGR	GGR	GGR	GGR	GGR
	Transcript evidence	Yes	No
IOB_NIMR_0139	Category	MGA	RGA	ANT	ANT	ANT	ANT	RGA	ANT	ANT	ANT	ANT	RGA	RGA	RGA	ANT	ANT	ANT
	Transcript evidence	Yes	Yes	Yes	Yes	Yes	NA	NA	Yes	NA	Yes	Yes	NA	NA	Yes	Yes	Yes	Yes
IOB_NIMR_0140	Category	MGA	RGA	GGR	ANT	ANT	ANT	ANT	ANT	ANT	ANT	ANT	RGA	ANT	ANT	ANT	ANT	ANT
	Transcript evidence	Yes	Yes		Yes	Yes	NA	NA	Yes	NA	Yes	Yes	NA	NA	Yes	Yes	Yes	Yes
IOB_NIMR_0141	Category	MGA	RGA	ANT	RGA	RGA	RGA	RGA	RGA	ANT	ANT	RGA	RGA	RGA	ANT	RGA	ANT	ANT
	Transcript evidence	Yes	Yes	Yes	Yes	Yes	NA	NA	Yes	NA	Yes	Yes	NA	NA	Yes	Yes	Yes	Yes
IOB_NIMR_0142	Category	MGA	RGA	ANT	MGA	ANT	MGA	RGA	ANT	MGA	ANT	MGA	MGA	RGA	ANT	MGA	MGA	ANT
	Transcript evidence	Yes	Yes	Yes	Yes	Yes	NA	NA	Yes	NA	Yes	Yes	NA	NA	Yes	Yes	Yes	Yes
IOB_NIMR_0143	Category	MGA	MGA	GGR	MGA	GGR	MGA	ANT	GGR	MGA	MGA	ANT	GGR	MGA	MGA	ANT	MGA	GGR
	Transcript evidence	YES	NO		NO		NA	NA		NA	YES	YES		NA	YES	YES	NO
IOB_NIMR_0144	Category	MGA	RGA	ANT	ANT	GGR	ANT	ANT	ANT	ANT	ANT	ANT	RGA	ANT	ANT	ANT	ANT	GGR
	Transcript evidence	YES	YES	YES	YES		NA	NA	YES	NA	YES	YES	NA	NA	YES	YES	YES
IOB_NIMR_0145	Category	MGA	ANT	GGR	GGR	GGR	GGR	ANT	GGR	GGR	GGR	RGA	GGR	ANT	GGR	RGA	ANT	GGR
	Transcript evidence	YES	NO					NA				YES		NA		NO	NO
IOB_NIMR_0146	Category	MGA	MGA	MGA	MGA	ANT	MGA	RGA	MGA	MGA	MGA	MGA	RGA	RGA	RGA	MGA	MGA	ANT
	Transcript evidence	YES	NO	YES	NO	YES	NA	NA	NO	NA	NO	YES	NA	NA	NO	YES	NO	NO
IOB_NIMR_0147	Category	MGA	RGA	RGA	RGA	RGA	MGA	RGA	ANT	RGA	ANT	RGA	ANT	ANT	MGA	RGA	RGA	ANT
	Transcript evidence	NO	YES	YES	YES	YES	NA	NA	YES	NA	YES	YES	NA	NA	YES	YES	YES	YES
IOB_NIMR_0148	Category	MGA	MGA	MGA	MGA	RGA	MGA	MGA	RGA	MGA	RGA	RGA	GSR	RGA	RGA	RGA	MGA	RGA
	Transcript evidence	NO	NO	NO	NO	NO	NA	NA	NO	NA	YES	NO	NA	NA	NO	NO	NO	NO
IOB_NIMR_0149	Category	MGA	ANT	ANT	ANt	ANT	ANT	ANT	ANT	ANT	ANT	ANT	ANT	ANT	ANT	ANT	ANT	ANT
	Transcript evidence	NO	no	yes	yes	yes	NA	NA	NO	NA	YES	YES	NA	NA	yes	yes	yes	yes
IOB_NIMR_0150	Category	MGA	RGA	ANT	ANT	ANT	ANT	ANT	ANT	ANT	ANT	ANT	MGA	ANT	ANT	RGA	ANT	ANT
	Transcript evidence	Yes	Yes	Yes	Yes	Yes	NA	NA	Yes	NA	Yes	Yes	NA	NA	Yes	Yes	Yes	Yes
IOB_NIMR_0151	Category	MGA	ANT	RGA	ANT	ANT	MGA	RGA	MGA	ANT	ANT	RGA	RGA	ANT	ANT	RGA	ANT	RGA
	Transcript evidence	Yes	Yes	Yes	Yes	Yes	NA	NA	Yes	NA	Yes	Yes	NA	NA	Yes	Yes	Yes	Yes
IOB_NIMR_0152	Category	MGA	RGA	ANT	RGA	RGA	RGA	RGA	ANT	ANT	MGA	RGA	RGA	RGA	RGA	ANT	RGA	RGA
	Transcript evidence	Yes	Yes	Yes	Yes	No	NA	NA	Yes	NA	Yes	Yes	NA	NA	Yes	Yes	Yes	Yes
IOB_NIMR_0153	Category	MGA	RGA	RGA	RGA	RGA	MGA	ANT	RGA	RGA	RGA	RGA	GGR	ANT	GGR	RGA	RGA	RGA
	Transcript evidence	Yes	Yes	YES	Yes	Yes	NA	NA	Yes	NA	Yes	Yes		NA		Yes	Yes	YES
IOB_NIMR_0154	Category	MGA	RGA	ANT	ANT	RGA	ANT	ANT	ANT	ANT	RGA	RGA	RGA	ANT	RGA	ANT	RGA	RGA
	Transcript evidence	Yes	Yes	Yes	Yes	Yes	NA	NA	Yes	NA	Yes	Yes	NA	NA	No	Yes	Yes	Yes
IOB_NIMR_0155	Category	MGA	RGA	ANT	ANT	ANT	ANT	ANT	ANT	ANT	ANT	RGA	ANT	ANT	RGA	MGA	ANT	ANT
	Transcript evidence	Yes	Yes	Yes	Yes	Yes	NA	NA	Yes	NA	Yes	Yes	NA	NA	Yes	Yes	Yes	Yes
IOB_NIMR_0156	Category	MGA	ANT	ANT	ANT	ANT	ANT	ANT	ANT	ANT	RGA	ANT	RGA	ANT	ANT	ANT	ANT	RGA
	Transcript evidence	Yes	Yes	Yes	Yes	Yes	NA	NA	Yes	NA	No	Yes	NA	NA	No	Yes	Yes	Yes
IOB_NIMR_0157	Category	MGA	RGA	MGA	ANT	MGA	ANT	ANT	ANT	ANT	ANT	ANT	RGA	RGA	ANT	ANT	ANT	MGA
	Transcript evidence	Yes	No	No	Yes	No	NA	NA	Yes	NA	Yes	No	NA	NA	No	No	No	No
IOB_NIMR_0158	Category	MGA	RGA	ANT	ANT	ANT	ANT	ANT	ANT	ANT	ANT	RGA	ANT	ANT	RGA	ANT	ANT	ANT
	Transcript evidence	No	No	No	Yes	Yes	NA	NA	Yes	NA	Yes	yes	NA	NA	Yes	Yes	Yes	Yes
IOB_NIMR_0159	Category	MGA	RGA	ANT	ANT	ANT	MGA	RGA	RGA	RGA	RGA	RGA	RGA	RGA	ANT	RGA	RGA	ANT
	Transcript evidence	Yes	Yes	Yes	Yes	Yes	NA	NA	Yes	NA	Yes	Yes	NA	NA	Yes	Yes	Yes	Yes
IOB_NIMR_0160	Category	MGA	ANT	MGA	MGA	ANT	MGA	ANT	MGA	ANT	ANT	ANT	RGA	RGA	ANT	MGA	MGA	MGA
	Transcript evidence	Yes	Yes	Yes	Yes	Yes	NA	NA	Yes	NA	Yes	Yes	NA	NA	Yes	Yes	Yes	Yes
IOB_NIMR_0161	Category	MGA	MGA	MGA	MGA	ANT	MGA	ANT	MGA	MGA	MGA	RGA	RGA	MGA	MGA	MGA	MGA	ANT
	Transcript evidence	Yes	Yes	Yes	Yes	Yes	NA	NA	Yes	NA	Yes	Yes	NA	NA	Yes	Yes	Yes	Yes
IOB_NIMR_0162	Category	MGA	RGA	RGA	RGA	RGA	RGA	RGA	RGA	RGA	RGA	RGA	GSR	RGA	RGA	RGA	RGA	RGA
	Transcript evidence	Yes	Yes	Yes	Yes	Yes	NA	NA	Yes	NA	Yes	Yes	NA	NA	Yes	Yes	Yes	Yes
IOB_NIMR_0163	Category	MGA	ANT	ANT	ANT	ANT	MGA	RGA	ANT	RGA	ANT	ANT	RGA	ANT	RGA	ANT	ANT	ANT
	Transcript evidence	Yes	Yes	Yes	Yes	YeS	NA	NA	YeS	NA	Yes	Yes	NA	NA	Yes	Yes	Yes	Yes
IOB_NIMR_0164	Category	MGA	RGA	ANT	RGA	RGA	MGA	ANT	RGA	MGA	ANT	ANT	RGA	ANT	ANT	RGA	ANT	ANT
	Transcript evidence	No	Yes	Yes	Yes	Yes	NA	NA	Yes	NA	Yes	Yes	NA	NA	Yes	Yes	Yes	Yes
IOB_NIMR_0165	Category	MGA	RGA	GGR	GGR	GGR	GGR	GGR	GGR	RGA	GGR	MGA	GGR	ANT	MGA	MGA	GGR	GGR
	Transcript evidence	Yes	No							NA		No		NA	No	No
IOB_NIMR_0166	Category	MGA	ANT	RGA	ANT	RGA	MGA	RGA	MGA	RGA	RGA	RGA	RGA	ANT	ANT	MGA	ANT	RGA
	Transcript evidence	Yes	Yes	Yes	Yes	Yes	NA	NA	Yes	NA	Yes	Yes	NA	NA	Yes	Yes	Yes	Yes
IOB_NIMR_0167	Category	MGA	RGA	RGA	RGA	RGA	RGA	RGA	RGA	RGA	MGA	RGA	RGA	RGA	RGA	RGA	RGA	RGA
	Transcript evidence	Yes	Yes	Yes	Yes	Yes	NA	NA	Yes	NA	Yes	Yes	NA	NA	Yes	YeS	YeS	Yes
IOB_NIMR_0168	Category	MGA	RGA	GGR	RGA	RGA	MGA	RGA	MGA	RGA	RGA	RGA	MGA	RGA	MGA	MGA	RGA	RGA
	Transcript evidence	No	Yes		Yes	Yes	NA	NA	Yes	NA	Yes	Yes	NA	NA	No	Yes	YeS	YeS
IOB_NIMR_0169	Category	MGA	MGA	GGR	MGA	RGA	MGA	RGA	MGA	MGA	RGA	MGA	MGA	MGA	MGA	MGA	MGA	MGA
	Transcript evidence	Yes	Yes		Yes	Yes	NA	NA	No	NA	Yes	Yes	NA	NA	Yes	Yes	Yes	No
IOB_NIMR_0170	Category	MGA	ANT	ANT	ANT	RGA	ANT	ANT	RGA	ANT	RGA	RGA	GGR	ANT	ANT	ANT	ANT	ANT
	Transcript evidence	No	Yes	Yes	Yes	Yes	NA	NA	Yes	NA	Yes	Yes		NA	Yes	Yes	Yes	Yes
IOB_NIMR_0171	Category	MGA	RGA	RGA	RGA	GGR	MGA	RGA	RGA	GGR	RGA	RGA	RGA	RGA	RGA	RGA	RGA	RGA
	Transcript evidence	Yes	Yes	Yes	Yes		NA	NA	Yes		Yes	Yes	NA	NA	Yes	Yes	Yes	Yes
IOB_NIMR_0172	Category	MGA	RGA	ANT	RGA	RGA	RGA	RGA	RGA	RGA	RGA	RGA	MGA	RGA	RGA	RGA	RGA	RGA
	Transcript evidence	No	No	Yes	Yes	Yes	NA	NA	Yes	NA	Yes	Yes	NA	NA	Yes	Yes	Yes	Yes
IOB_NIMR_0173	Category	MGA	RGA	RGA	RGA	RGA	MGA	RGA	RGA	RGA	RGA	RGA	ANT	RGA	MGA	RGA	RGA	ANT
	Transcript evidence	Yes	Yes	Yes	Yes	Yes	NA	NA	Yes	NA	Yes	Yes	NA	NA	Yes	Yes	Yes	Yes
IOB_NIMR_0174	Category	MGA	MGA	RGA	MGA	GGR	MGA	MGA	MGA	MGA	MGA	MGA	MGA	MGA	MGA	MGA	MGA	MGA
	Transcript evidence	No	No	Yes	Yes		NA	NA	Yes	NA	Yes	Yes	NA	NA	Yes	Yes	Yes	Yes
IOB_NIMR_0175	Category	MGA	RGA	ANT	ANT	ANT	ANT	ANT	ANT	ANT	ANT	RGA	GGR	ANT	ANT	RGA	ANT	ANT
	Transcript evidence	Yes	Yes	Yes	Yes	Yes	NA	NA	Yes	NA	Yes	Yes		NA	Yes	Yes	Yes	Yes
IOB_NIMR_0176	Category	MGA	RGA	ANT	ANT	ANT	ANT	ANT	ANT	ANT	ANT	ANT	ANT	ANT	ANT	ANT	ANT	ANT
	Transcript evidence	Yes	Yes	Yes	Yes	Yes	NA	NA	Yes	NA	Yes	Yes	NA	NA	Yes	Yes	Yes	Yes
IOB_NIMR_0177	Category	MGA	ANT	ANT	ANT	ANT	ANT	ANT	ANT	RGA	ANT	ANT	ANT	ANT	ANT	ANT	ANT	GGR
	Transcript evidence	Yes	Yes	Yes	Yes	Yes	NA	NA	Yes	NA	Yes	Yes	NA	NA	Yes	Yes	Yes
IOB_NIMR_0178	Category	MGA	MGA	MGA	MGA	RGA	MGA	RGA	GGR	MGA	MGA	MGA	MGA	GGR	RGA	MGA	MGA	RGA
	Transcript evidence	Yes	Yes	Yes	Yes	Yes	NA	NA		NA	Yes	Yes	NA		Yes	Yes	Yes	Yes
IOB_NIMR_0179	Category	MGA	MGA	ANT	ANT	ANT	ANT	ANT	RGA	ANT	RGA	RGA	MGA	ANT	ANT	RGA	ANT	RGA
	Transcript evidence	No	Yes	Yes	Yes	Yes	NA	NA	Yes	NA	Yes	Yes	NA	NA	Yes	Yes	Yes	Yes
IOB_NIMR_0180	Category	MGA	ANT	GGR	GGR	GGR	ANT	ANT	GGR	ANT	GGR	ANT	ANT	ANT	GGR	ANT	ANT	GGR
	Transcript evidence	No	No				NA	NA		NA		Yes	NA	NA		No	No
IOB_NIMR_0181	Category	MGA	ANT	MGA	MGA	MGA	ANT	RGA	MGA	RGA	ANT	RGA	MGA	MGA	RGA	ANT	ANT	RGA
	Transcript evidence	Yes	No	No	Yes	Yes	NA	NA	Yes	NA	Yes	Yes	NA	NA	Yes	No	Yes	Yes
IOB_NIMR_0182	Category	MGA	ANT	ANT	RGA	MGA	RGA	RGA	RGA	RGA	RGA	ANT	RGA	MGA	RGA	ANT	RGA	RGA
	Transcript evidence	Yes	No	Yes	No	Yes	NA	NA	Yes	NA	Yes	Yes	NA	NA	Yes	No	Yes	Yes
IOB_NIMR_0183	Category	MGA	ANT	MGA	MGA	MGA	MGA	MGA	ANT	MGA	RGA	RGA	MGA	MGA	MGA	MGA	MGA	GSR
	Transcript evidence	Yes	Yes	Yes	Yes	Yes	NA	NA	Yes	NA	Yes	Yes	NA	NA	Yes	Yes	Yes	Yes
IOB_NIMR_0184	Category	MGA	RGA	ANT	ANT	RGA	ANT	ANT	RGA	ANT	RGA	RGA	ANT	ANT	RGA	ANT	RGA	RGA
	Transcript evidence	YES	YES	YES	YES	YES	NA	NA	YES	NA	YES	YES	NA	NA	YES	YES	YES	YES
IOB_NIMR_0185	Category	MGA	MGA	ANT	MGA	MGA	MGA	RGA	MGA	MGA	MGA	RGA	MGA	RGA	MGA	RGA	MGA	MGA
	Transcript evidence	YES	YES	YES	YES	YES	NA	NA	YES	NA	YES	YES	NA	NA	YES	YES	YES	YES
IOB_NIMR_0186	Category	MGA	RGA	RGA	RGA	RGA	RGA	RGA	RGA	RGA	RGA	RGA	RGA	RGA	RGA	RGA	RGA	RGA
	Transcript evidence	Yes	Yes	Yes	Yes	Yes	NA	NA	Yes	NA	Yes	Yes	NA	NA	Yes	Yes	Yes	Yes
IOB_NIMR_0187	Category	MGA	RGA	RGA	RGA	RGA	RGA	RGA	RGA	RGA	RGA	RGA	ANT	RGA	RGA	RGA	RGA	RGA
	Transcript evidence	Yes	Yes	Yes	YES	Yes	NA	NA	YES	NA	No	YES	NA	NA	YES	YES	Yes	Yes
IOB_NIMR_0188	Category	MGA	RGA	RGA	RGA	RGA	RGA	RGA	RGA	RGA	RGA	RGA	RGA	RGA	RGA	RGA	RGA	RGA
	Transcript evidence	Yes	Yes	Yes	Yes	Yes	NA	NA	Yes	NA	Yes	Yes	NA	NA	Yes	Yes	Yes	Yes
IOB_NIMR_0189	Category	MGA	RGA	RGA	RGA	RGA	RGA	RGA	RGA	RGA	RGA	RGA	MGA	MGA	RGA	RGA	RGA	RGA
	Transcript evidence	Yes	No	Yes	Yes	Yes	NA	NA	Yes	NA	Yes	Yes	NA	NA	Yes	Yes	Yes	Yes
IOB_NIMR_0190	Category	MGA	ANT	ANT	ANT	MGA	ANT	MGA	ANT	ANT	MGA	ANT	MGA	MGA	MGA	ANT	ANT	MGA
	Transcript evidence	Yes	Yes	Yes	Yes	Yes	NA	NA	Yes	NA	Yes	Yes	NA	NA	Yes	Yes	Yes	Yes
IOB_NIMR_0191	Category	MGA	MGA	ANT	ANT	ANT	ANT	ANT	ANT	ANT	GGR	GGR	ANT	ANT	ANT	ANT	ANT	ANT
	Transcript evidence	YES	YES	YES	YES	YES	NA	NA	YES	NA			NA	NA	YES	YES	YES	YES
IOB_NIMR_0192	Category	MGA	MGA	MGA	MGA	MGA	MGA	ANT	MGA	GGR	MGA	MGA	MGA	MGA	ANT	ANT	MGA	MGA
	Transcript evidence	Yes	Yes	No	Yes	Yes	NA	NA	Yes		Yes	Yes	NA	NA	Yes	Yes	Yes	Yes
IOB_NIMR_0193	Category	MGA	MGA	MGA	MGA	MGA	MGA	GGR	MGA	GGR	MGA	MGA	MGA	GGR	MGA	MGA	MGA	MGA
	Transcript evidence	No	Yes	Yes	Yes	Yes	NA		Yes		Yes	Yes	NA		Yes	Yes	Yes	No
IOB_NIMR_0194	Category	MGA	MGA	MGA	MGA	MGA	MGA	ANT	MGA	MGA	MGA	MGA	RGA	MGA	MGA	MGA	GGR	MGA
	Transcript evidence	Yes	Yes	Yes	Yes	Yes	NA	NA	Yes	NA	Yes	Yes	NA	NA	No	Yes		Yes
IOB_NIMR_0195	Category	MGA	MGA	MGA	MGA	MGA	MGA	MGA	GGR	MGA	MGA	MGA	MGA	MGA	MGA	MGA	MGA	MGA
	Transcript evidence	Yes	Yes	No	No	No	NA	NA		NA	No	Yes	NA	NA	Yes	No	Yes	No
IOB_NIMR_0196	Category	MGA	MGA	ANT	ANT	RGA	RGA	RGA	MGA	RGA	RGA	ANT	RGA	RGA	ANT	RGA	ANT	RGA
	Transcript evidence	Yes	Yes	Yes	Yes	Yes	NA	NA	Yes	NA	No	Yes	NA	NA	Yes	Yes	Yes	Yes
IOB_NIMR_0197	Category	MGA	MGA	RGA	RGA	RGA	RGA	RGA	RGA	RGA	RGA	ANT	RGA	RGA	RGA	RGA	RGA	RGA
	Transcript evidence	No	Yes	Yes	Yes	Yes	NA	NA	Yes	NA	Yes	Yes	NA	NA	Yes	Yes	Yes	Yes
IOB_NIMR_0198	Category	MGA	ANT	MGA	ANT	ANT	GGR	ANT	ANT	ANT	ANT	ANT	RGA	ANT	ANT	ANT	ANT	ANT
	Transcript evidence	Yes	Yes	Yes	Yes	Yes		NA	Yes	NA	Yes	Yes	NA	NA	Yes	Yes	Yes	Yes
IOB_NIMR_0199	Category	MGA	ANT	MGA	ANT	ANT	GGR	ANT	ANT	ANT	ANT	ANT	ANT	ANT	ANT	ANT	ANT	MGA
	Transcript evidence	Yes	Yes	No	Yes	Yes		NA	Yes	NA	Yes	Yes	NA	NA	Yes	Yes	Yes	Yes
IOB_NIMR_0200	Category	MGA	MGA	RGA	MGA	ANT	GGR	ANT	MGA	MGA	ANT	MGA	MGA	ANT	ANT	MGA	MGA	RGA
	Transcript evidence	Yes	Yes	Yes	Yes	Yes		NA	Yes	NA	No	Yes	NA	NA	Yes	Yes	Yes	Yes
IOB_NIMR_0201	Category	MGA	RGA	GGR	MGA	GGR	MGA	MGA	RGA	MGA	RGA	RGA	MGA	RGA	RGA	RGA	MGA	GGR
	Transcript evidence	Yes	Yes		Yes		NA	NA	Yes	NA	No	Yes	NA	NA	Yes	Yes	Yes
IOB_NIMR_0202	Category	MGA	MGA	GGR	MGA	GGR	GGR	RGA	MGA	GGR	GGR	ANT	MGA	GGR	GGR	RGA	GGR	MGA
	Transcript evidence	No	Yes		No			NA	Yes			Yes	NA			Yes		Yes
IOB_NIMR_0203	Category	MGA	RGA	MGA	ANT	MGA	RGA	MGA	RGA	MGA	MGA	RGA	RGA	MGA	MGA	RGA	MGA	MGA
	Transcript evidence	Yes	Yes	Yes	Yes	Yes	NA	NA	Yes	NA	Yes	Yes	NA	NA	Yes	Yes	Yes	Yes
IOB_NIMR_0204	Category	MGA	RGA	ANT	RGA	MGA	MGA	MGA	RGA	MGA	ANT	MGA	MGA	MGA	ANT	MGA	RGA	MGA
	Transcript evidence	Yes	Yes	Yes	Yes	Yes	NA	NA	Yes	NA	Yes	Yes	NA	NA	Yes	Yes	Yes	Yes
IOB_NIMR_0205	Category	MGA	ANT	ANT	RGA	ANT	ANT	ANT	ANT	MGA	ANT	RGA	RGA	ANT	RGA	ANT	ANT	ANT
	Transcript evidence	Yes	Yes	Yes	Yes	Yes	NA	NA	Yes	NA	Yes	Yes	NA	NA	Yes	Yes	Yes	Yes
IOB_NIMR_0206	Category	MGA	RGA	MGA	MGA	MGA	MGA	MGA	MGA	MGA	RGA	RGA	MGA	MGA	RGA	RGA	MGA	MGA
	Transcript evidence	Yes	Yes	Yes	Yes	Yes	NA	NA	Yes	NA	Yes	Yes	NA	NA	Yes	Yes	No	Yes
IOB_NIMR_0207	Category	MGA	ANT	ANT	ANT	ANT	ANT	ANT	ANT	ANT	ANT	ANT	ANT	RGA	ANT	ANT	ANT	ANT
	Transcript evidence	Yes	No	Yes	Yes	Yes	NA	NA	Yes	NA	Yes	Yes	NA	NA	Yes	Yes	Yes	No
IOB_NIMR_0208	Category	MGA	ANT	GGR	RGA	GGR	GGR	ANT	ANT	GGR	GGR	ANT	ANT	RGA	ANT	ANT	RGA	MGA
	Transcript evidence	Yes	Yes		Yes			NA	Yes			Yes	NA	NA	Yes	Yes	Yes	Yes
IOB_NIMR_0209	Category	MGA	RGA	GGR	ANT	GGR	MGA	ANT	GGR	ANT	GGR	ANT	RGA	RGA	ANT	ANT	ANT	GGR
	Transcript evidence	Yes	Yes		Yes		NA	NA		NA		Yes	NA	NA	Yes	Yes	Yes
IOB_NIMR_0210	Category	MGA	RGA	RGA	RGA	RGA	RGA	RGA	RGA	RGA	RGA	RGA	RGA	RGA	RGA	RGA	RGA	ANT
	Transcript evidence	Yes	Yes	Yes	Yes	Yes	NA	NA	Yes	NA	Yes	Yes	NA	NA	Yes	Yes	Yes	Yes
IOB_NIMR_0211	Category	MGA	ANT	ANT	ANT	RGA	RGA	RGA	RGA	RGA	ANT	RGA	RGA	RGA	ANT	ANT	ANT	RGA
	Transcript evidence	Yes	yes	yes	yes	yes	NA	NA	Yes	NA	Yes	Yes	NA	NA	Yes	Yes	Yes	yes
IOB_NIMR_0212	Category	MGA	RGA	ANT	ANT	ANT	RGA	RGA	RGA	ANT	ANT	RGA	GSR	ANT	ANT	RGA	ANT	ANT
	Transcript evidence	Yes	Yes	Yes	Yes	Yes	NA	NA	Yes	NA	Yes	Yes	NA	NA	Yes	Yes	Yes	Yes
IOB_NIMR_0213	Category	MGA	RGA	RGA	RGA	RGA	RGA	RGA	RGA	RGA	RGA	RGA	RGA	RGA	RGA	RGA	RGA	RGA
	Transcript evidence	Yes	Yes	Yes	Yes	Yes	NA	NA	Yes	NA	Yes	Yes	NA	NA	Yes	Yes	Yes	Yes
IOB_NIMR_0214	Category	MGA	MGA	ANT	MGA	ANT	MGA	ANT	MGA	MGA	RGA	ANT	MGA	MGA	MGA	ANT	MGA	ANT
	Transcript evidence	No	No	Yes	Yes	Yes	NA	NA	Yes	NA	Yes	Yes	NA	NA	Yes	Yes	Yes	Yes
IOB_NIMR_0215	Category	MGA	GGR	ANT	ANT	MGA	MGA	MGA	RGA	RGA	RGA	RGA	MGA	MGA	MGA	ANT	ANT	ANT
	Transcript evidence	No		Yes	Yes	No	NA	NA	Yes	NA	Yes	Yes	NA	NA	Yes	Yes	Yes	Yes
IOB_NIMR_0216	Category	MGA	RGA	ANT	RGA	RGA	MGA	RGA	ANT	RGA	MGA	RGA	RGA	RGA	RGA	RGA	RGA	RGA
	Transcript evidence	Yes	No	Yes	Yes	Yes	NA	NA	Yes	NA	Yes	No	NA	NA	Yes	Yes	Yes	Yes
IOB_NIMR_0217	Category	MGA	RGA	RGA	RGA	RGA	RGA	RGA	RGA	RGA	RGA	RGA	RGA	RGA	RGA	RGA	RGA	RGA
	Transcript evidence	Yes	Yes	Yes	Yes	Yes	NA	NA	Yes	NA	NA	Yes	NA	NA	Yes	Yes	Yes	Yes
IOB_NIMR_0218	Category	MGA	MGA	RGA	RGA	MGA	RGA	RGA	RGA	RGA	MGA	RGA	MGA	MGA	RGA	RGA	RGA	MGA
	Transcript evidence	Yes	Yes	Yes	Yes	Yes	NA	NA	Yes	NA	No	Yes	NA	NA	Yes	Yes	Yes	Yes
IOB_NIMR_0219	Category	MGA	MGA	MGA	MGA	MGA	MGA	MGA	MGA	MGA	MGA	MGA	MGA	MGA	MGA	MGA	MGA	MGA
	Transcript evidence	YES	YES	YES	YES	YES	NA	NA	YES	NA	YES	YES	NA	NA	YES	YES	YES	YES
IOB_NIMR_0220	Category	MGA	ANT	RGA	RGA	GGR	RGA	RGA	RGA	RGA	RGA	RGA	RGA	RGA	RGA	RGA	RGA	GGR
	Transcript evidence	Yes	Yes	Yes	Yes		NA	NA	Yes	NA	NA	Yes	NA	NA	Yes	Yes	Yes
IOB_NIMR_0221	Category	MGA	ANT	ANT	ANT	ANT	ANT	GGR	ANT	MGA	MGA	RGA	GGR	MGA	ANT	RGA	ANT	RGA
	Transcript evidence	Yes	Yes	Yes	Yes	Yes	NA		Yes	NA	Yes	Yes		NA	Yes	Yes	Yes	Yes
IOB_NIMR_0222	Category	MGA	RGA	RGA	RGA	RGA	GGR	RGA	RGA	RGA	RGA	RGA	RGA	RGA	RGA	RGA	RGA	RGA
	Transcript evidence	Yes	Yes	Yes	Yes	Yes		NA	Yes	NA	Yes	Yes	NA	NA	Yes	Yes	Yes	Yes
IOB_NIMR_0223	Category	MGA	MGA	MGA	MGA	MGA	MGA	MGA	MGA	MGA	MGA	MGA	MGA + GSR	MGA	MGA	MGA	MGA	MGA
	Transcript evidence	YES	YES	YES	YES	YES	NA	NA	YES	NA	YES	YES	NA	NA	YES	YES	NO	YES
IOB_NIMR_0224	Category	MGA	MGA	MGA	MGA	ANT	MGA	MGA	MGA	MGA	MGA	MGA	MGA	MGA	MGA	MGA	MGA	MGA
	Transcript evidence	YES	YES	YES	YES	YES	NA	NA	YES	NA	YES	YES	NA	NA	YES	YES	YES	YES
IOB_NIMR_0225	Category	MGA	MGA	ANT	ANT	ANT	MGA	MGA	ANT	ANT	MGA	ANT	RGA	RGA	ANT	ANT	ANT	RGA
	Transcript evidence	YES	YES	YES	YES	YES	NA	NA	YES	NA	YES	YES	NA	NA	YES	YES	YES	YES
IOB_NIMR_0226	Category	MGA	ANT	GGR	ANT	GGR	ANT	ANT	ANT	ANT	ANT	ANT	ANT	ANT	ANT	ANT	ANT	GGR
	Transcript evidence	NO	YES		YES		NA	NA	YES	NA	YES	YES	NA	NA	YES	YES	YES
IOB_NIMR_0227	Category	MGA	MGA	ANT	MGA	ANT	MGA	ANT	MGA	ANT	ANT	MGA	ANT	ANT	ANT	MGA	MGA	MGA
	Transcript evidence	NO	YES	YES	YES	YES	NA	NA	YES	NA	YES	YES	NA	NA	YES	YES	YES	YES
IOB_NIMR_0228	Category	MGA	MGA	ANT	MGA	RGA	RGA	RGA	RGA	RGA	ANT	RGA	MGA	RGA	RGA	RGA	RGA	MGA
	Transcript evidence	YES	YES	YES	YES	Yes	NA	NA	Yes	NA	YES	Yes	NA	NA	Yes	Yes	Yes	YES
IOB_NIMR_0229	Category	MGA	ANT	ANT	ANT	ANT	ANT	ANT	ANT	ANT	ANT	RGA	ANT	ANT	ANT	ANT	ANT	ANT
	Transcript evidence	Yes	Yes	Yes	Yes	Yes	NA	NA	Yes	NA	Yes	Yes	NA	NA	Yes	Yes	Yes	Yes
IOB_NIMR_0230	Category	MGA	MGA	ANT	MGA	ANT	GGR	ANT	ANT	MGA	ANT	ANT	ANT	ANT	ANT	MGA	MGA	ANT
	Transcript evidence	Yes	Yes	Yes	Yes	Yes		NA	Yes	NA	Yes	Yes	NA	NA	Yes	Yes	Yes	Yes
IOB_NIMR_0231	Category	MGA	RGA	ANT	ANT	ANT	MGA	RGA	RGA	RGA	RGA	RGA	MGA	RGA	RGA	RGA	RGA	RGA
	Transcript evidence	YES	YES	YES	YES	YES	NA	NA	YES	NA	YES	YES	NA	NA	YES	YES	YES	YES
IOB_NIMR_0232	Category	MGA	RGA	RGA	RGA	MGA	RGA	ANT	RGA	MGA	RGA	RGA	ANT	RGA	RGA	RGA	RGA	MGA
	Transcript evidence	YES	YES	YES	YES	YES	NA	NA	YES	NA	YES	YES	NA	NA	YES	YES	YES	YES
IOB_NIMR_0233	Category	MGA	RGA	RGA	GGR	RGA	GGR	GGR	MGA	MGA	MGA	GGR	MGA	GGR	MGA	RGA	MGA	RGA
	Transcript evidence	YES	RGA	YES		YES			YES	NA	YES		NA		YES	YES	YES	YES
IOB_NIMR_0234	Category	MGA	RGA	ANT	ANT	ANT	ANT	RGA	ANT	ANT	ANT	RGA	RGA	ANT	ANT	RGA	ANT	ANT
	Transcript evidence	YES	YES	YES	YES	YES	NA	NA	YES	NA	YES	YES	NA	NA	YES	YES	YES	YES
IOB_NIMR_0235	Category	MGA	RGA	RGA	RGA	MGA	RGA	MGA	RGA	RGA	RGA	RGA	RGA	RGA	RGA	RGA	RGA	MGA
	Transcript evidence	Yes	Yes	Yes	Yes	No	NA	NA	Yes	NA	Yes	Yes	NA	NA	Yes	Yes	Yes	No
IOB_NIMR_0236	Category	MGA	RGA	RGA	ANT	ANT	ANT	RGA	ANT	RGA	ANT	ANT	RGA	ANT	ANT	RGA	ANT	ANT
	Transcript evidence	Yes	No	Yes	Yes	Yes	NA	NA	Yes	NA	Yes	Yes	NA	NA	Yes	Yes	Yes	Yes
IOB_NIMR_0237	Category	MGA	MGA	RGA	RGA	RGA	MGA	RGA	RGA	RGA	RGA	MGA	RGA	RGA	RGA	MGA	MGA	ANT
	Transcript evidence	No	No	Yes	Yes	Yes	NA	NA	Yes	NA	Yes	Yes	NA	NA	Yes	Yes	Yes	Yes
IOB_NIMR_0238	Category	MGA	RGA	GGR	RGA	GGR	RGA	RGA	ANT	MGA	ANT	MGA	MGA	MGA	MGA	RGA	RGA	MGA
	Transcript evidence	No	No		Yes		NA	NA	Yes	NA	Yes	Yes	NA	NA	Yes	No	No	No
IOB_NIMR_0239	Category	MGA	ANT	MGA	ANT	ANT	ANT	MGA	ANT	RGA	ANT	ANT	ANT	ANT	ANT	ANT	ANT	ANT
	Transcript evidence	Yes	No	Yes	Yes	Yes	NA	NA	Yes	NA	Yes	Yes	NA	NA	Yes	Yes	Yes	Yes
IOB_NIMR_0240	Category	MGA	MGA	GGR	MGA	GGR	MGA	RGA	GGR	MGA	MGA	RGA	GGR	MGA	MGA	RGA	MGA	GGR
	Transcript evidence	Yes	Yes		Yes		NA	NA		NA	No	Yes		NA	Yes	Yes	Yes
IOB_NIMR_0241	Category	MGA	MGA	GGR	GGR	GGR	GGR	GGR	GGR	GGR	GGR	GGR	GGR	GGR	GGR	GGR	GGR	GGR
	Transcript evidence	No	No
IOB_NIMR_0242	Category	MGA	RGA	ANT	ANT	ANT	ANT	ANT	ANT	ANT	ANT	ANT	MGA	MGA	ANT	ANT	ANT	ANT
	Transcript evidence	Yes	No	Yes	Yes	Yes	NA	NA	Yes	NA	Yes	Yes	NA	NA	Yes	Yes	Yes	Yes
IOB_NIMR_0243	Category	MGA	MGA	GGR	GGR	GGR	GGR	GGR	GGR	GGR	GGR	GGR	GGR	GGR	GGR	GGR	GGR	GGR
	Transcript evidence	Yes	No
IOB_NIMR_0244	Category	MGA	ANT	GGR	MGA	MGA	GGR	MGA	ANT	MGA	MGA	ANT	ANT	MGA	MGA	MGA	MGA	GGR
	Transcript evidence	Yes	No		Yes	Yes		NA	Yes	NA	Yes	Yes	NA	NA	Yes	Yes	Yes
IOB_NIMR_0245	Category	MGA	ANT	ANT	ANT	ANT	ANT	ANT	ANT	RGA	RGA	ANT	ANT	ANT	ANT	ANT	ANT	ANT
	Transcript evidence	NO	NO	NO	NO	YES	NA	NA	YES	NA	YES	YES	NA	NA	NO	YES	NO	NO
IOB_NIMR_0246	Category	MGA	ANT	ANT	ANT	ANT	ANT	ANT	ANT	RGA	ANT	ANT	ANT	RGA	ANT	ANT	RGA	RGA
	Transcript evidence	YES	YES	YES	YES	YES	NA	NA	YES	NA	YES	YES	NA	NA	YES	YES	YES	YES
IOB_NIMR_0247	Category	MGA	RGA	ANT	RGA	RGA	MGA	RGA	RGA	RGA	ANT	RGA	RGA	RGA	RGA	RGA	RGA	RGA
	Transcript evidence	NO	YES	YES	YES	YES	NA	NA	YES	NA	YES	YES	NA	NA	YES	YES	YES	YES
IOB_NIMR_0248	Category	MGA	MGA	GGR	MGA	MGA	MGA	MGA	MGA	MGA	MGA	MGA	MGA	MGA	MGA	MGA	MGA	MGA
	Transcript evidence	YES	YES		YES	YES	NA	NA	YES	NA	YES	YES	NA	NA	YES	YES	YES	YES
IOB_NIMR_0249	Category	MGA	ANT	MGA	MGA	ANT	MGA	ANT	MGA	ANT	ANT	ANT	ANT	ANT	ANT	MGA	MGA	ANT
	Transcript evidence	NO	YES	YES	YES	YES	NA	NA	YES	NA	YES	YES	NA	NA	YES	YES	YES	YES
IOB_NIMR_0250	Category	MGA	ANT	ANT	ANT	MGA	RGA	RGA	ANT	ANT	ANT	RGA	GGR	MGA	RGA	NT	GGR	RGA
	Transcript evidence	YES	YES	YES	YES	YES	NA	NA	YES	NA	YES	YES		NA	YES	YES		NO
IOB_NIMR_0251	Category	MGA	RGA	MGA	RGA	GGR	GGR	MGA	ANT	GGR	GGR	MGA	MGA	MGA	GGR	MGA	ANT	GGR
	Transcript evidence	Yes	Yes	Yes	Yes			NA	Yes			Yes	NA	NA		Yes	Yes
IOB_NIMR_0252	Category	MGA	RGA	MGA	RGA	ANT	MGA	ANT	ANT	RGA	ANT	ANT	RGA	RGA	RGA	ANT	RGA	ANT
	Transcript evidence	Yes	Yes	No	Yes	Yes	NA	NA	No	NA	Yes	Yes	NA	NA	No	Yes	Yes	Yes
IOB_NIMR_0253	Category	MGA	ANT	ANT	RGA	RGA	ANT	ANT	ANT	RGA	ANT	ANT	RGA	RGA	ANT	ANT	ANT	RGA
	Transcript evidence	No	No	Yes	Yes	Yes	NA	NA	Yes	NA	Yes	Yes	NA	NA	Yes	Yes	Yes	Yes
IOB_NIMR_0254	Category	MGA	MGA	ANT	MGA	ANT	MGA	ANT	MGA	GGR	MGA	ANT	MGA	MGA	MGA	ANT	MGA	ANT
	Transcript evidence	Yes	No	Yes	Yes	Yes	NA	NA	Yes		Yes	Yes	NA	NA	Yes	Yes	Yes	Yes
IOB_NIMR_0255	Category	MGA	MGA	GGR	GGR	GGR	GGR	GGR	GGR	GGR	MGA	GGR	GGR	GGR	MGA	GGR	GGR	GGR
	Transcript evidence	No	Yes								Yes				Yes
IOB_NIMR_0256	Category	MGA	MGA	ANT	MGA	ANT	MGA	ANT	MGA	MGA	MGA	ANT	MGA	MGA	MGA	ANT	MGA	ANT
	Transcript evidence	Yes	Yes	Yes	Yes	Yes	NA	NA	Yes	NA	Yes	Yes	NA	NA	Yes	Yes	Yes	Yes
IOB_NIMR_0257	Category	MGA	RGA	ANT	RGA	ANT	ANT	ANT	RGA	RGA	RGA	RGA	RGA	RGA	RGA	RGA	RGA	ANT
	Transcript evidence	Yes	Yes	Yes	Yes	Yes	NA	NA	Yes	NA	Yes	Yes	NA	NA	Yes	Yes	Yes	Yes
IOB_NIMR_0258	Category	MGA	ANT	ANT	ANT	ANT	ANT	ANT	ANT	ANT	ANT	ANT	ANT	ANT	ANT	ANT	ANT	ANT
	Transcript evidence	Yes	Yes	Yes	Yes	Yes	NA	NA	Yes	NA	Yes	Yes	NA	NA	Yes	Yes	Yes	Yes
IOB_NIMR_0259	Category	MGA	RGA	RGA	ANT	MGA	MGA	MGA	ANT	MGA	MGA	RGA	MGA	MGA	MGA	ANT	RGA	MGA
	Transcript evidence	Yes	Yes	Yes	Yes	Yes	NA	NA	Yes	NA	No	Yes	NA	NA	Yes	Yes	Yes	Yes
IOB_NIMR_0260	Category	MGA	RGA	RGA	RGA	RGA	RGA	RGA	RGA	RGA	RGA	RGA	ANT	RGA	RGA	RGA	RGA	RGA
	Transcript evidence	Yes	Yes	Yes	Yes	Yes	NA	NA	Yes	NA	Yes	Yes	NA	NA	Yes	Yes	Yes	Yes
IOB_NIMR_0261	Category	MGA	RGA	RGA	RGA	RGA	RGA	RGA	RGA	RGA	RGA	RGA	ANT	RGA	RGA	RGA	RGA	RGA
	Transcript evidence	Yes	Yes	Yes	Yes	Yes	NA	NA	Yes	NA	Yes	Yes	NA	NA	Yes	Yes	Yes	Yes
IOB_NIMR_0262	Category	MGA	RGA	ANT	RGA	MGA	RGA	RGA	ANT	RGA	GGR	RGA	GGR	GGR	MGA	RGA	RGA	ANT
	Transcript evidence	Yes	Yes	Yes	Yes	Yes	NA	NA	Yes	NA	No	Yes	NA	NA	Yes	Yes	Yes	Yes

## Sheet: Revised annotations
Supplemental Table S6.3 - Summary of revised annotations in 16 genomes
Prasad et al., 2016. Integrating transcriptomic and proteomic data for accurate assembly and annotation of genomes
Name of the gene		AsteI2	AsteS1	AalbS1	AaraD1	AatrE1	AchrA1	AculA1	AdirW1	AepiE1	AfarE1	AfunF1	AmacM1	AmelC1	AmerM1	AminM1	AquaS1	AsinS1
ASTEI02374	Category	RGA	RGA	RGA	RGA	RGA	RGA	RGA	RGA	RGA	RGA	RGA	GSR	GGR	RGA	RGA	RGA	GGR
	Transcript evidence	Yes	Yes	Yes	Yes	Yes	NA	NA	Yes	NA	Yes	Yes	NA	NA	Yes	Yes	Yes	No
ASTEI02380	Category	RGA	RGA	ANT	RGA	RGA	ANT	RGA	ANT	ANT	ANT	ANT	ANT	ANT	RGA	RGA	RGA	ANT
	Transcript evidence	Yes	Yes	Yes	Yes	Yes	NA	NA	Yes	NA	Yes	Yes	NA	NA	Yes	Yes	Yes	Yes
ASTEI02407	Category	RGA	RGA	ANT	RGA	ANT	RGA	RGA	RGA	RGA	RGA	RGA	ANT	RGA	RGA	RGA	RGA	RGA
	Transcript evidence	Yes	Yes	Yes	Yes	Yes	NA	NA	Yes	NA	Yes	Yes	NA	NA	Yes	Yes	Yes	Yes
ASTEI02642	Category	RGA	RGA	ANT	RGA	ANT	RGA	RGA	RGA	RGA	RGA	RGA	ANT	RGA	RGA	RGA	RGA	RGA
	Transcript evidence	Yes	Yes	Yes	Yes	Yes	NA	NA	Yes	NA	Yes	Yes	NA	NA	Yes	Yes	Yes	Yes
ASTEI05294	Category	RGA	RGA	RGA	ANT	ANT	ANT	RGA	RGA	RGA	RGA	RGA	GGR	ANT	RGA	RGA	ANT	ANT
	Transcript evidence	Yes	Yes	Yes	Yes	Yes	NA	NA	Yes	NA	Yes	Yes	NA	NA	Yes	Yes	Yes	Yes
ASTEI06139	Category	RGA	RGA	RGA	ANT	ANT	ANT	ANT	ANT	RGA	ANT	ANT	GSR	ANT	ANT	ANT	ANT	RGA
	Transcript evidence	Yes	Yes	Yes	Yes	Yes	NA	NA	Yes	NA	Yes	Yes	NA	NA	Yes	Yes	Yes	Yes
ASTEI07748	Category	RGA	ANT	ANT	MGA	ANT	MGA	RGA	RGA	GGR	RGA	RGA	RGA	GGR	MGA	RGA	MGA	ANT
	Transcript evidence	No	No	Yes	Yes	Yes	NA	NA	Yes	NA	Yes	Yes	NA	NA	Yes	Yes	Yes	Yes
ASTEI08226	Category	RGA	RGA	RGA	RGA	RGA	MGA	RGA	RGA	RGA	RGA	RGA	GGR	GGR	MGA	RGA	MGA	GGR
	Transcript evidence	Yes	No	Yes	Yes	Yes	NA	NA	Yes	NA	Yes	Yes	NA	NA	Yes	Yes	Yes	No
ASTEI01955	Category	RGA	RGA	GGR	GGR	RGA	RGA	RGA	RGA	RGA	GGR	RGA	GSR	RGA	RGA	RGA	GGR	RGA
	Transcript evidence	Yes	Yes	No	No	Yes	NA	NA	Yes	NA	No	Yes	NA	NA	Yes	Yes	No	Yes
ASTEI02092	Category	RGA	RGA	GGR	RGA	GGR	GGR	GSR	GGR	RGA	GGR	RGA	MGA	RGA	RGA	RGA	RGA	GGR
	Transcript evidence	Yes	Yes	No	Yes	No	NA	NA	No	NA	No	Yes	NA	NA	Yes	Yes	Yes	No
ASTEI02288 (NE, EE)	Category	RGA	RGA	RGA	ANT	RGA	RGA	ANT	RGA	RGA	RGA	RGA	GSR	RGA	MGA	RGA	ANT	RGA
	Transcript evidence	Yes	Yes	Yes	Yes	Yes	NA	NA	Yes	NA	Yes	Yes	NA	NA	Yes	Yes	Yes	Yes
ASTEI02448	Category	RGA	RGA	RGA	RGA	RGA	RGA	RGA	RGA	RGA	RGA	RGA	GSR	RGA	RGA	RGA	RGA	ANT
	Transcript evidence	Yes	Yes	Yes	Yes	Yes	NA	NA	Yes	NA	Yes	Yes	NA	NA	Yes	Yes	Yes	Yes
ASTEI09166	Category	RGA	RGA	RGA	RGA	MGA	MGA	RGA	RGA	RGA	RGA	MGA	RGA	MGA	MGA	MGA	MGA	ANT
	Transcript evidence	Yes	No	No	Yes	Yes	NA	NA	Yes	NA	Yes	Yes	NA	NA	Yes	Yes	Yes	Yes
ASTEI10124	Category	RGA	RGA	MGA	MGA	ANT	MGA	MGA	MGA	MGA	MGA	MGA	GGR	MGA	RGA	RGA	MGA	GGR
	Transcript evidence	Yes	Yes	Yes	Yes	Yes	NA	NA	Yes	NA	Yes	Yes	NA	NA	Yes	Yes	Yes	No
ASTEI10271	Category	RGA	RGA	RGA	MGA	RGA	MGA	ANT	MGA	MGA	MGA	RGA	RGA	RGA	RGA	MGA	MGA	MGA
	Transcript evidence	Yes	Yes	Yes	Yes	Yes	NA	NA	Yes	NA	Yes	Yes	NA	NA	Yes	Yes	Yes	Yes
ASTEI10361	Category	RGA	RGA	RGA	RGA	RGA	RGA	RGA	RGA	RGA	RGA	RGA	MGA	RGA	RGA	RGA	RGA	RGA
	Transcript evidence	Yes	Yes	Yes	Yes	Yes	NA	NA	Yes	NA	Yes	Yes	NA	NA	Yes	Yes	Yes	Yes
ASTEI10455	Category	RGA	RGA	MGA	MGA	RGA	RGA	RGA	MGA	MGA	GGR	RGA	GGR	GGR	GGR	RGA	GGR	GGR
	Transcript evidence	Yes	No	No	Yes	No	NA	NA	Yes	NA	No	Yes	NA	NA	No	Yes	No	No
ASTEI10518	Category	RGA	RGA	GGR	GGR	GGR	GGR	RGA	RGA	GGR	GGR	MGA	RGA	GGR	GGR	RGA	GGR	GGR
	Transcript evidence	Yes	Yes	No	No	No	NA	NA	Yes	NA	No	Yes	NA	NA	No	Yes	No	No
ASTEI10631, ASTEI10632	Category	RGA	RGA	RGA	RGA	RGA	RGA	MGA	RGA	RGA	RGA	RGA	MGA	RGA	RGA	RGA	RGA	RGA
	Transcript evidence	Yes	Yes	Yes	Yes	Yes	NA	NA	Yes	NA	Yes	Yes	NA	NA	Yes	Yes	Yes	Yes
ASTEI10046	Category	RGA	RGA	ANT	ANT	ANT	RGA	ANT	ANT	ANT	ANT	ANT	RGA	ANT	ANT	ANT	ANT	ANT
	Transcript evidence	Yes	Yes	Yes	Yes	Yes	NA	NA	Yes	NA	Yes	Yes	NA	NA	Yes	Yes	Yes	Yes
ASTEI09103	Category	RGA	ANT	RGA	ANT	MGA	ANT	ANT	ANT	ANT	ANT	RGA	ANT	ANT	ANT	ANT	ANT	ANT
	Transcript evidence	Yes	No	No	No	No	NA	NA	No	NA	Yes	No	NA	NA	Yes	Yes	Yes	Yes
ASTEI06268	Category	RGA	ANT	ANT	ANT	ANT	ANT	ANT	ANT	RGA	ANT	ANT	ANT	ANT	ANT	ANT	ANT	ANT
	Transcript evidence	No	Yes	Yes	Yes	Yes	NA	NA	Yes	NA	Yes	Yes	NA	NA	Yes	Yes	Yes	Yes
ASTEI06382	Category	RGA	RGA	MGA	RGA	RGA	RGA	ANT	RGA	RGA	ANT	ANT	RGA	RGA	RGA	ANT	RGA	ANT
	Transcript evidence	Yes	Yes	Yes	Yes	Yes	NA	NA	Yes	NA	Yes	Yes	NA	NA	Yes	Yes	Yes	Yes
ASTEI06582	Category	RGA	ANT	ANT	ANT	ANT	ANT	RGA	ANT	ANT	ANT	ANT	GSR	ANT	ANT	ANT	ANT	GGR
	Transcript evidence	Yes	Yes	Yes	Yes	Yes	NA	NA	Yes	NA	Yes	Yes	NA	NA	Yes	Yes	Yes	No
ASTEI07866	Category	RGA	ANT	ANT	RGA	RGA	ANT	ANT	ANT	GGR	ANT	RGA	ANT	RGA	RGA	ANT	RGA	ANT
	Transcript evidence	Yes	Yes	Yes	Yes	Yes	NA	NA	Yes	NA	Yes	Yes	NA	NA	Yes	Yes	Yes	Yes
ASTEI095322	Category	RGA	ANT	GGR	GGR	MGA	GGR	RGA	GGR	GGR	MGA	GGR	MGA	GGR	GGR	MGA	MGA	GGR
	Transcript evidence	Yes	No	No	No	No	NA	NA	No	NA	No	No	NA	NA	No	Yes	Yes	No
ASTEI10069	Category	RGA	ANT	RGA	RGA	RGA	ANT	RGA	RGA	RGA	ANT	ANT	MGA	ANT	RGA	RGA	RGA	GGR
	Transcript evidence	Yes	No	Yes	No	Yes	NA	NA	No	NA	No	No	NA	NA	Yes	Yes	Yes	No
ASTEI10186	Category	RGA	GSR	ANT	ANT	ANT	ANT	ANT	ANT	ANT	RGA	RGA	ANT	RGA	RGA	RGA	ANT	ANT
	Transcript evidence	No	No	Yes	No	Yes	NA	NA	No	NA	No	No	NA	NA	No	No	Yes	Yes
ASTEI05040	Category	RGA	RGA	RGA	RGA	ANT	RGA	ANT	RGA	RGA	RGA	RGA	GSR	RGA	RGA	RGA	RGA	ANT
	Transcript evidence	Yes	Yes	Yes	Yes	Yes	NA	NA	Yes	NA	Yes	Yes	NA	NA	Yes	Yes	Yes	Yes
ASTEI06191	Category	RGA	RGA	ANT	RGA	RGA	GSR	ANT	RGA	RGA	RGA	RGA	GSR	GSR	ANT	RGA	RGA	RGA
	Transcript evidence	Yes	Yes	Yes	Yes	Yes	NA	NA	Yes	NA	Yes	Yes	NA	NA	Yes	Yes	Yes	Yes
ASTEI06735	Category	RGA	RGA	ANT	ANT	ANT	ANT	GGR	ANT	ANT	ANT	ANT	RGA	ANT	ANT	RGA	ANT	ANT
	Transcript evidence	Yes	Yes	Yes	Yes	Yes	NA	NA	Yes	NA	Yes	Yes	NA	NA	Yes	Yes	Yes	Yes
ASTEI07057	Category	RGA	RGA	RGA	RGA	RGA	RGA	RGA	RGA	RGA	RGA	RGA	GSR	RGA	RGA	RGA	RGA	RGA
	Transcript evidence	Yes	Yes	Yes	Yes	Yes	NA	NA	Yes	NA	No	No	NA	NA	No	Yes	Yes	Yes
ASTEI07104	Category	RGA	RGA	RGA	RGA	RGA	RGA	RGA	RGA	RGA	RGA	RGA	GSR	RGA	RGA	RGA	RGA	RGA
	Transcript evidence	Yes	Yes	Yes	Yes	Yes	NA	NA	Yes	NA	Yes	Yes	NA	NA	Yes	Yes	Yes	Yes
ASTEI07376	Category	RGA	RGA	RGA	RGA	RGA	RGA	RGA	RGA	RGA	RGA	RGA	GSR	RGA	RGA	RGA	RGA	RGA
	Transcript evidence	Yes	Yes	Yes	Yes	Yes	NA	NA	Yes	NA	Yes	Yes	NA	NA	Yes	Yes	Yes	Yes
ASTEI07827	Category	RGA	RGA	MGA	RGA	RGA	MGA	RGA	RGA	RGA	RGA	RGA	GSR	MGA	RGA	RGA	RGA	RGA
	Transcript evidence	Yes	Yes	No	Yes	No	NA	NA	Yes	NA	Yes	Yes	NA	NA	No	Yes	Yes	No
ASTEI08283	Category	RGA	RGA	RGA	RGA	RGA	RGA	RGA	RGA	RGA	RGA	RGA	GSR	RGA	RGA	RGA	RGA	ANT
	Transcript evidence	Yes	Yes	Yes	Yes	Yes	NA	NA	Yes	NA	Yes	Yes	NA	NA	Yes	Yes	Yes	Yes
ASTEI07092	Category	RGA	RGA	ANT	RGA	RGA	RGA	RGA	RGA	RGA	RGA	RGA	GSR	RGA	RGA	RGA	RGA	RGA
	Transcript evidence	Yes	Yes	Yes	Yes	Yes	NA	NA	Yes	NA	Yes	Yes	NA	NA	Yes	Yes	Yes	Yes
ASTEI07855	Category	RGA	RGA	RGA	RGA	RGA	RGA	RGA	RGA	RGA	RGA	RGA	RGA	RGA	RGA	RGA	RGA	RGA
	Transcript evidence	Yes	Yes	Yes	Yes	Yes	NA	NA	Yes	NA	Yes	Yes	NA	NA	Yes	Yes	Yes	Yes
ASTEI08655	Category	RGA	RGA	RGA	RGA	RGA	RGA	RGA	RGA	RGA	RGA	RGA	GSR	RGA	RGA	RGA	RGA	RGA
	Transcript evidence	Yes	Yes	Yes	Yes	Yes	NA	NA	Yes	NA	Yes	Yes	NA	NA	Yes	Yes	Yes	Yes
ASTEI00095	Category	RGA	RGA	ANT	ANT	ANT	ANT	ANT	ANT	ANT	ANT	ANT	ANT	ANT	ANT	ANT	ANT	ANT
	Transcript evidence	Yes	Yes	Yes	Yes	Yes	NA	NA	Yes	NA	Yes	Yes	NA	NA	Yes	Yes	Yes	Yes
ASTEI00021	Category	RGA	ANT	ANT	ANT	ANT	ANT	ANT	ANT	ANT	ANT	ANT	ANT	ANT	ANT	ANT	ANT	ANT
	Transcript evidence	Yes	Yes	Yes	Yes	Yes	NA	NA	Yes	NA	Yes	Yes	NA	NA	Yes	Yes	Yes	Yes
ASTEI00138	Category	RGA	RGA	RGA	RGA	RGA	ANT	ANT	ANT	RGA	ANT	ANT	ANT	ANT	ANT	RGA	ANT	RGA
	Transcript evidence	No	Yes	Yes	Yes	Yes	NA	NA	Yes	NA	Yes	Yes	NA	NA	Yes	Yes	Yes	Yes
ASTEI00276	Category	RGA	RGA	ANT	RGA	ANT	RGA	RGA	ANT	RGA	ANT	RGA	RGA	RGA	RGA	RGA	ANT	ANT
	Transcript evidence	Yes	Yes	Yes	Yes	Yes	NA	NA	Yes	NA	Yes	Yes	NA	NA	Yes	Yes	Yes	Yes
ASTEI01925	Category	RGA	RGA	RGA	MGA	RGA	RGA	MGA	MGA	RGA	RGA	RGA	MGA	GGR	RGA	RGA	MGA	GGR
	Transcript evidence	Yes	Yes	Yes	Yes	Yes	NA	NA	Yes	NA	Yes	Yes	NA	NA	No	Yes	Yes	No
ASTEI01954	Category	RGA	RGA	ANT	ANT	ANT	RGA	ANT	RGA	RGA	ANT	RGA	ANT	ANT	ANT	ANT	ANT	ANT
	Transcript evidence	Yes	Yes	Yes	Yes	Yes	NA	NA	Yes	NA	Yes	Yes	NA	NA	Yes	Yes	Yes	Yes
ASTEI02033	Category	RGA	RGA	GGR	RGA	GGR	RGA	RGA	RGA	RGA	RGA	RGA	MGA	RGA	RGA	RGA	RGA	RGA
	Transcript evidence	Yes	Yes	No	No	No	NA	NA	Yes	NA	Yes	Yes	NA	NA	Yes	Yes	Yes	Yes
ASTEI02146	Category	RGA	ANT	ANT	RGA	ANT	RGA	RGA	RGA	RGA	ANT	RGA	RGA	ANT	ANT	ANT	ANT	ANT
	Transcript evidence	Yes	Yes	Yes	Yes	Yes	NA	NA	Yes	NA	Yes	Yes	NA	NA	Yes	Yes	Yes	Yes
ASTEI02235	Category	RGA	RGA	RGA	GGR	RGA	GGR	RGA	GGR	GGR	ANT	RGA	MGA	RGA	MGA	RGA	RGA	RGA
	Transcript evidence	Yes	Yes	Yes	No	Yes	NA	NA	No	NA	Yes	Yes	NA	NA	Yes	Yes	Yes	Yes
ASTEI02290	Category	RGA	RGA	ANT	ANT	ANT	RGA	RGA	ANT	ANT	ANT	ANT	MGA	MGA	MGA	ANT	RGA	ANT
	Transcript evidence	Yes	Yes	Yes	Yes	Yes	NA	NA	Yes	NA	Yes	Yes	NA	NA	Yes	Yes	Yes	Yes
ASTEI06611	Category	RGA	GSR	ANT	ANT	ANT	ANT	ANT	ANT	ANT	ANT	ANT	GGR	ANT	ANT	ANT	ANT	GSR
	Transcript evidence	Yes	No	Yes	Yes	Yes	NA	NA	Yes	NA	Yes	Yes	NA	NA	Yes	Yes	Yes	No
ASTEI06828	Category	RGA	RGA	ANT	ANT	RGA	ANT	ANT	ANT	RGA	RGA	RGA	ANT	ANT	RGA	RGA	ANT	RGA
	Transcript evidence	Yes	Yes	Yes	Yes	Yes	NA	NA	Yes	NA	Yes	Yes	NA	NA	No	Yes	Yes	Yes
ASTEI07285	Category	RGA	ANT	ANT	ANT	ANT	ANT	ANT	ANT	ANT	ANT	ANT	GGR	ANT	ANT	ANT	ANT	ANT
	Transcript evidence	Yes	Yes	Yes	Yes	Yes	NA	NA	Yes	NA	Yes	Yes	NA	NA	Yes	Yes	Yes	Yes
ASTEI07327	Category	RGA	RGA	ANT	ANT	RGA	GSR	ANT	ANT	ANT	RGA	ANT	RGA	RGA	RGA	ANT	RGA	ANT
	Transcript evidence	No	Yes	Yes	Yes	Yes	NA	NA	Yes	NA	Yes	Yes	NA	NA	Yes	Yes	Yes	Yes
ASTEI07728	Category	RGA	ANT	ANT	ANT	ANT	ANT	ANT	ANT	ANT	ANT	ANT	ANT	ANT	ANT	ANT	ANT	ANT
	Transcript evidence	Yes	Yes	Yes	Yes	Yes	NA	NA	Yes	NA	Yes	Yes	NA	NA	Yes	Yes	Yes	Yes
ASTEI07956	Category	RGA	ANT	GGR	RGA	RGA	ANT	ANT	RGA	RGA	RGA	MGA	ANT	ANT	RGA	RGA	RGA	RGA
	Transcript evidence	No	Yes	No	Yes	Yes	NA	NA	Yes	NA	Yes	Yes	NA	NA	Yes	No	No	Yes
ASTEI00841	Category	RGA	RGA	ANT	RGA	ANT	RGA	RGA	RGA	RGA	RGA	RGA	RGA	RGA	RGA	RGA	RGA	ANT
	Transcript evidence	Yes	Yes	Yes	Yes	Yes	NA	NA	Yes	NA	Yes	Yes	NA	NA	Yes	Yes	Yes	Yes
ASTEI00848	Category	RGA	RGA	RGA	RGA	RGA	ANT	RGA	RGA	RGA	RGA	RGA	ANT	RGA	RGA	RGA	RGA	RGA
	Transcript evidence	Yes	Yes	No	Yes	Yes	NA	NA	Yes	NA	Yes	Yes	NA	NA	No	Yes	Yes	Yes
ASTEI00924	Category	RGA	RGA	RGA	RGA	RGA	RGA	RGA	RGA	RGA	RGA	RGA	RGA	RGA	RGA	RGA	RGA	RGA
	Transcript evidence	Yes	Yes	Yes	Yes	No	NA	NA	Yes	NA	Yes	Yes	NA	NA	No	No	Yes	No
ASTEI06650	Category	RGA	RGA	MGA	MGA	MGA	GGR	GGR	ANT	MGA	MGA	MGA	GGR	MGA	MGA	RGA	MGA	MGA
	Transcript evidence	Yes	Yes	Yes	Yes	Yes	NA	NA	Yes	NA	Yes	Yes	NA	NA	Yes	Yes	No	Yes
ASTEI06698	Category	RGA	RGA	ANT	MGA	RGA	ANT	ANT	ANT	ANT	ANT	ANT	GGR	GGR	ANT	ANT	MGA	RGA
	Transcript evidence	Yes	Yes	Yes	Yes	Yes	NA	NA	Yes	NA	Yes	Yes	NA	NA	Yes	Yes	Yes	Yes
ASTEI08107	Category	RGA	RGA	RGA	RGA	RGA	GGR	GGR	ANT	GGR	RGA	RGA	GGR	GGR	RGA	RGA	RGA	RGA
	Transcript evidence	Yes	Yes	Yes	Yes	Yes	NA	NA	Yes	NA	Yes	Yes	NA	NA	Yes	Yes	Yes	Yes
ASTEI08227	Category	RGA	RGA	RGA	RGA	RGA	GGR	GGR	RGA	RGA	RGA	RGA	GGR	GGR	MGA	RGA	RGA	MGA
	Transcript evidence	Yes	Yes	Yes	Yes	Yes	NA	NA	Yes	NA	Yes	Yes	NA	NA	Yes	Yes	Yes	Yes
ASTEI08753	Category	RGA	ANT	RGA	RGA	RGA	GGR	ANT	RGA	RGA	ANT	RGA	ANT	ANT	RGA	RGA	RGA	ANT
	Transcript evidence	Yes	Yes	Yes	Yes	Yes	NA	NA	Yes	NA	Yes	Yes	NA	NA	Yes	Yes	Yes	Yes
ASTEI08928	Category	RGA	ANT	ANT	ANT	ANT	ANT	ANT	ANT	ANT	RGA	ANT	GGR	ANT	ANT	ANT	ANT	ANT
	Transcript evidence	Yes	Yes	Yes	Yes	Yes	NA	NA	Yes	NA	Yes	Yes	NA	NA	Yes	Yes	Yes	Yes
ASTEI06528	Category	RGA	RGA	ANT	ANT	ANT	GSR	ANT	ANT	ANT	ANT	ANT	GSR	GSR	ANT	ANT	ANT	ANT
	Transcript evidence	Yes	Yes	Yes	Yes	Yes	NA	NA	Yes	NA	Yes	Yes	NA	NA	Yes	Yes	Yes	Yes
ASTEI08929	Category	RGA	RGA	GGR	MGA	GGR	MGA	MGA	MGA	MGA	MGA	MGA	MGA	MGA	MGA	MGA	MGA	GGR
	Transcript evidence	Yes	Yes	No	Yes	No	NA	NA	Yes	NA	No	Yes	NA	NA	No	Yes	Yes	No
ASTEI09025	Category	RGA	RGA	GGR	MGA	GGR	GGR	MGA	GGR	GGR	GGR	GGR	GGR	MGA	MGA	MGA	MGA	GGR
	Transcript evidence	Yes	Yes	No	Yes	No	NA	NA	No	NA	No	No	NA	NA	Yes	Yes	Yes	No
ASTEI09302	Category	RGA	RGA	RGA	RGA	RGA	RGA	RGA	RGA	RGA	RGA	RGA	GSR	RGA	RGA	RGA	RGA	RGA
	Transcript evidence	Yes	Yes	Yes	Yes	Yes	NA	NA	Yes	NA	Yes	Yes	NA	NA	Yes	Yes	Yes	Yes
ASTEI093046	Category	RGA	RGA	GGR	ANT	GGR	ANT	RGA	ANT	ANT	RGA	ANT	ANT	ANT	RGA	ANT	ANT	ANT
	Transcript evidence	Yes	No	No	No	No	NA	NA	Yes	NA	Yes	Yes	NA	NA	No	Yes	Yes	Yes
ASTEI09484	Category	RGA	RGA	ANT	RGA	RGA	RGA	RGA	RGA	RGA	RGA	RGA	RGA	RGA	RGA	RGA	RGA	RGA
	Transcript evidence	No	No	No	No	Yes	NA	NA	Yes	NA	Yes	Yes	NA	NA	Yes	Yes	Yes	Yes
ASTEI09752	Category	RGA	RGA	RGA	MGA	RGA	RGA	ANT	RGA	ANT	ANT	ANT	RGA	MGA	ANT	ANT	RGA	ANT
	Transcript evidence	Yes	No	Yes	Yes	Yes	NA	NA	Yes	NA	Yes	Yes	NA	NA	Yes	Yes	Yes	Yes
ASTEI09910	Category	RGA	RGA	ANT	RGA	ANT	RGA	ANT	RGA	RGA	RGA	RGA	RGA	ANT	RGA	RGA	RGA	RGA
	Transcript evidence	Yes	Yes	Yes	No	Yes	NA	NA	Yes	NA	Yes	Yes	NA	NA	No	Yes	Yes	No
ASTEI10727	Category	RGA	RGA	RGA	RGA	RGA	MGA	ANT	RGA	RGA	RGA	RGA	RGA	ANT	RGA	RGA	RGA	ANT
	Transcript evidence	Yes	Yes	Yes	Yes	Yes	NA	NA	Yes	NA	Yes	Yes	NA	NA	Yes	Yes	Yes	Yes
ASTEI00809	Category	RGA	RGA	MGA	MGA	MGA	RGA	ANT	ANT	RGA	ANT	ANT	RGA	RGA	ANT	ANT	RGA	ANT
	Transcript evidence	Yes	No	No	No	No	NA	NA	No	NA	Yes	No	NA	NA	No	No	No	No
ASTEI00787, ASTEI00788, ASTEI00789	Category	RGA	RGA	RGA	RGA	RGA	GSR	RGA	RGA	RGA	RGA	RGA	GSR	MGA	RGA	RGA	RGA	ANT
	Transcript evidence	Yes	No	Yes	No	Yes	NA	NA	Yes	NA	Yes	No	NA	NA	No	No	No	Yes
ASTEI10796, ASTEI10797	Category	RGA	RGA	RGA	RGA	RGA	GSR	RGA	ANT	RGA	ANT	RGA	GSR	GSR	RGA	RGA	RGA	RGA
	Transcript evidence	Yes	No	Yes	No	Yes	NA	NA	Yes	NA	Yes	No	NA	NA	No	No	No	No
ASTEI00927	Category	RGA	RGA	RGA	RGA	RGA	RGA	MGA	RGA	RGA	RGA	RGA	MGA	MGA	RGA	ANT	RGA	RGA
	Transcript evidence	No	Yes	Yes	Yes	Yes	NA	NA	Yes	NA	Yes	Yes	NA	NA	Yes	Yes	Yes	Yes
ASTE100293	Category	RGA	RGA	ANT	ANT	ANT	ANT	ANT	ANT	ANT	ANT	ANT	ANT	ANT	ANT	ANT	ANT	ANT
	Transcript evidence	Yes	Yes	Yes	Yes	Yes	NA	NA	Yes	NA	Yes	Yes	NA	NA	Yes	No	Yes	Yes
ASTEI00959	Category	RGA	RGA	ANT	RGA	ANT	MGA	RGA	ANT	ANT	ANT	RGA	RGA	RGA	ANT	RGA	MGA	ANT
	Transcript evidence	No	Yes	Yes	Yes	Yes	NA	NA	Yes	NA	Yes	Yes	NA	NA	Yes	Yes	Yes	Yes
ASTEI00746	Category	RGA	RGA	ANT	RGA	ANT	RGA	RGA	RGA	RGA	RGA	ANT	RGA	RGA	ANT	RGA	RGA	RGA
	Transcript evidence	Yes	Yes	Yes	Yes	Yes	NA	NA	Yes	NA	Yes	Yes	NA	NA	Yes	Yes	Yes	No
ASTEI00678	Category	RGA	RGA	MGA	ANT	ANT	ANT	MGA	ANT	ANT	ANT	RGA	RGA	ANT	ANT	ANT	RGA	MGA
	Transcript evidence	Yes	Yes	No	Yes	Yes	NA	NA	Yes	NA	Yes	Yes	NA	NA	Yes	Yes	Yes	No
ASTEI00986	Category	RGA	RGA	ANT	RGA	RGA	RGA	MGA	RGA	RGA	RGA	RGA	MGA	RGA	RGA	RGA	RGA	RGA
	Transcript evidence	Yes	Yes	Yes	Yes	Yes	NA	NA	Yes	NA	Yes	Yes	NA	NA	Yes	Yes	Yes	Yes
ASTEI00956	Category	RGA	RGA	ANT	RGA	RGA	RGA	RGA	RGA	RGA	RGA	RGA	MGA	RGA	RGA	RGA	RGA	RGA
	Transcript evidence	Yes	No	Yes	Yes	Yes	NA	NA	Yes	NA	Yes	Yes	NA	NA	Yes	Yes	Yes	Yes
ASTEI05881	Category	RGA	ANT	RGA	RGA	RGA	RGA	RGA	RGA	RGA	RGA	RGA	GGR	RGA	RGA	RGA	RGA	RGA
	Transcript evidence	Yes	Yes	Yes	Yes	Yes	NA	NA	Yes	NA	Yes	Yes	NA	NA	Yes	Yes	Yes	Yes
ASTEI05700	Category	RGA	ANT	ANT	RGA	ANT	RGA	RGA	RGA	RGA	RGA	RGA	RGA	RGA	RGA	RGA	RGA	ANT
	Transcript evidence	Yes	Yes	Yes	Yes	Yes	NA	NA	Yes	NA	Yes	Yes	NA	NA	Yes	Yes	Yes	Yes
ASTEI05688	Category	RGA	RGA	ANT	ANT	ANT	ANT	ANT	RGA	ANT	RGA	RGA	GGR	RGA	RGA	RGA	RGA	RGA
	Transcript evidence	Yes	Yes	Yes	Yes	Yes	NA	NA	Yes	NA	Yes	Yes	NA	NA	No	Yes	Yes	Yes
ASTEI01830	Category	RGA	RGA	RGA	RGA	RGA	RGA	RGA	RGA	RGA	RGA	RGA	GSR	ANT	RGA	RGA	RGA	RGA
	Transcript evidence	Yes	Yes	Yes	Yes	Yes	NA	NA	Yes	NA	Yes	Yes	NA	NA	Yes	Yes	Yes	Yes
ASTEI01723	Category	RGA	RGA	RGA	RGA	RGA	RGA	RGA	RGA	RGA	RGA	RGA	RGA	RGA	RGA	RGA	RGA	RGA
	Transcript evidence	Yes	Yes	Yes	Yes	Yes	NA	NA	Yes	NA	Yes	Yes	NA	NA	Yes	Yes	Yes	Yes
ASTEI01724	Category	RGA	RGA	RGA	ANT	RGA	ANT	RGA	RGA	RGA	RGA	RGA	RGA	ANT	RGA	RGA	ANT	RGA
	Transcript evidence	Yes	Yes	Yes	Yes	Yes	NA	NA	Yes	NA	Yes	Yes	NA	NA	Yes	Yes	Yes	Yes
ASTEI01769	Category	RGA	RGA	RGA	RGA	RGA	RGA	RGA	RGA	RGA	RGA	RGA	RGA	RGA	RGA	RGA	RGA	RGA
	Transcript evidence	Yes	Yes	Yes	Yes	Yes	NA	NA	Yes	NA	Yes	Yes	NA	NA	Yes	Yes	Yes	Yes
ASTEI01782; ASTEI01783	Category	RGA	ANT	ANT	ANT	RGA	ANT	ANT	ANT	ANT	ANT	ANT	RGA	RGA	RGA	ANT	RGA	ANT
	Transcript evidence	Yes	Yes	Yes	Yes	Yes	NA	NA	Yes	NA	Yes	Yes	NA	NA	No	Yes	Yes	Yes
ASTEI01847; ASTEI01849	Category	RGA	RGA	RGA	RGA	RGA	RGA	ANT	RGA	RGA	RGA	RGA	GSR	RGA	RGA	RGA	RGA	RGA
	Transcript evidence	Yes	Yes	Yes	Yes	Yes	NA	NA	Yes	NA	Yes	Yes	NA	NA	Yes	Yes	Yes	Yes
ASTEI01801	Category	RGA	RGA	MGA	MGA	ANT	MGA	RGA	MGA	RGA	ANT	RGA	RGA	ANT	ANT	MGA	MGA	RGA
	Transcript evidence	No	No	Yes	Yes	Yes	NA	NA	Yes	NA	Yes	No	NA	NA	No	Yes	Yes	No
ASTEI08990	Category	RGA	ANT	ANT	ANT	RGA	ANT	ANT	ANT	ANT	ANT	ANT	MGA	ANT	ANT	ANT	ANT	ANT
	Transcript evidence	Yes	Yes	Yes	Yes	Yes	NA	NA	Yes	NA	Yes	Yes	NA	NA	Yes	Yes	Yes	Yes
ASTEI09053	Category	RGA	RGA	RGA	RGA	RGA	RGA	RGA	RGA	RGA	RGA	RGA	RGA	RGA	RGA	RGA	RGA	GGR
	Transcript evidence	Yes	Yes	Yes	Yes	Yes	NA	NA	Yes	NA	Yes	Yes	NA	NA	Yes	Yes	Yes	No
ASTEI09052	Category	RGA	RGA	GGR	RGA	RGA	RGA	RGA	RGA	RGA	RGA	RGA	RGA	RGA	RGA	RGA	RGA	RGA
	Transcript evidence	Yes	Yes	No	Yes	Yes	NA	NA	Yes	NA	Yes	Yes	NA	NA	Yes	Yes	Yes	Yes
ASTEI08895	Category	RGA	RGA	ANT	ANT	ANT	MGA	ANT	MGA	ANT	ANT	ANT	ANT	ANT	ANT	ANT	ANT	ANT
	Transcript evidence	No	Yes	Yes	Yes	Yes	NA	NA	Yes	NA	Yes	Yes	NA	NA	Yes	Yes	Yes	Yes
ASTEI08960	Category	RGA	RGA	RGA	RGA	GGR	MGA	RGA	RGA	RGA	RGA	RGA	MGA	RGA	RGA	RGA	RGA	GGR
	Transcript evidence	Yes	Yes	Yes	Yes	No	NA	NA	Yes	NA	Yes	Yes	NA	NA	Yes	Yes	Yes	No
ASTEI09117	Category	RGA	ANT	ANT	RGA	ANT	ANT	MGA	RGA	RGA	ANT	ANT	ANT	MGA	ANT	ANT	ANT	MGA
	Transcript evidence	Yes	Yes	Yes	Yes	Yes	NA	NA	Yes	NA	Yes	Yes	NA	NA	Yes	Yes	Yes	Yes
ASTEI09235	Category	RGA	ANT	ANT	ANT	GGR	ANT	ANT	GGR	ANT	ANT	ANT	GGR	ANT	ANT	ANT	ANT	ANT
	Transcript evidence	Yes	Yes	Yes	Yes	No	NA	NA	No	NA	Yes	Yes	NA	NA	Yes	Yes	Yes	Yes
ASTEI08702	Category	RGA	ANT	ANT	RGA	ANT	ANT	ANT	RGA	ANT	ANT	ANT	GSR	ANT	ANT	ANT	ANT	ANT
	Transcript evidence	Yes	Yes	Yes	Yes	Yes	NA	NA	Yes	NA	Yes	Yes	NA	NA	Yes	Yes	Yes	Yes
ASTEI08696	Category	RGA	ANT	ANT	ANT	ANT	ANT	ANT	ANT	ANT	ANT	ANT	ANT	RGA	RGA	ANT	ANT	ANT
	Transcript evidence	Yes	Yes	Yes	Yes	Yes	NA	NA	Yes	NA	Yes	Yes	NA	NA	Yes	Yes	Yes	Yes
ASTEI08778	Category	RGA	RGA	GGR	ANT	GGR	MGA	MGA	RGA	RGA	RGA	RGA	MGA	MGA	RGA	RGA	RGA	GGR
	Transcript evidence	Yes	Yes	No	Yes	No	NA	NA	Yes	NA	Yes	No	NA	NA	Yes	No	No	No
ASTEI08831	Category	RGA	ANT	RGA	ANT	ANT	ANT	ANT	ANT	ANT	RGA	ANT	RGA	ANT	ANT	RGA	ANT	ANT
	Transcript evidence	Yes	No	Yes	Yes	Yes	NA	NA	Yes	NA	Yes	Yes	NA	NA	Yes	Yes	Yes	Yes
ASTEI08943	Category	RGA	ANT	RGA	RGA	ANT	ANT	RGA	ANT	RGA	RGA	RGA	RGA	RGA	RGA	RGA	RGA	MGA
	Transcript evidence	Yes	Yes	Yes	Yes	Yes	NA	NA	Yes	NA	Yes	Yes	NA	NA	No	Yes	No	Yes
ASTEI00001	Category	RGA	RGA	ANT	RGA	ANT	GGR	ANT	ANT	ANT	GGR	RGA	RGA	MGA	RGA	GGR	RGA	GGR
	Transcript evidence	Yes	Yes	Yes	Yes	Yes	NA	NA	Yes	NA	No	Yes	NA	NA	Yes	No	Yes	No
ASTEI02221	Category	RGA	RGA	ANT	ANT	ANT	ANT	ANT	ANT	ANT	ANT	ANT	ANT	ANT	ANT	ANT	ANT	ANT
	Transcript evidence	Yes	Yes	Yes	Yes	Yes	NA	NA	Yes	NA	Yes	Yes	NA	NA	Yes	Yes	Yes	Yes
ASTEI02284	Category	RGA	ANT	GGR	ANT	ANT	RGA	ANT	RGA	RGA	ANT	RGA	ANT	ANT	ANT	ANT	ANT	GGR
	Transcript evidence	No	Yes	No	Yes	Yes	NA	NA	Yes	NA	Yes	Yes	NA	NA	Yes	Yes	Yes	No
ASTEI02304	Category	RGA	RGA	ANT	RGA	ANT	RGA	ANT	RGA	RGA	RGA	RGA	ANT	RGA	RGA	RGA	RGA	RGA
	Transcript evidence	Yes	Yes	Yes	Yes	Yes	NA	NA	Yes	NA	Yes	Yes	NA	NA	Yes	Yes	Yes	Yes
ASTEI02425	Category	RGA	ANT	RGA	ANT	ANT	RGA	ANT	RGA	RGA	ANT	RGA	ANT	ANT	ANT	ANT	RGA	GGR
	Transcript evidence	Yes	Yes	Yes	Yes	Yes	NA	NA	Yes	NA	Yes	Yes	NA	NA	Yes	Yes	Yes	No
ASTEI02435	Category	RGA	RGA	RGA	RGA	RGA	GGR	ANT	RGA	GGR	GGR	RGA	ANT	RGA	GGR	RGA	RGA	GGR
	Transcript evidence	No	Yes	Yes	Yes	Yes	NA	NA	Yes	NA	No	Yes	NA	NA	No	Yes	Yes	No
ASTEI02610	Category	RGA	RGA	ANT	RGA	ANT	RGA	ANT	RGA	RGA	RGA	RGA	ANT	RGA	RGA	RGA	RGA	RGA
	Transcript evidence	Yes	Yes	Yes	Yes	Yes	NA	NA	Yes	NA	Yes	Yes	NA	NA	Yes	Yes	Yes	Yes
ASTEI04290	Category	RGA	RGA	ANT	ANT	ANT	ANT	ANT	ANT	ANT	ANT	ANT	ANT	ANT	ANT	ANT	ANT	ANT
	Transcript evidence	Yes	Yes	Yes	Yes	Yes	NA	NA	Yes	NA	Yes	Yes	NA	NA	Yes	Yes	Yes	Yes
ASTEI04331	Category	RGA	RGA	ANT	ANT	ANT	ANT	ANT	ANT	ANT	ANT	ANT	ANT	ANT	ANT	ANT	ANT	ANT
	Transcript evidence	Yes	Yes	Yes	Yes	Yes	NA	NA	Yes	NA	Yes	Yes	NA	NA	Yes	Yes	Yes	Yes
ASTEI05125	Category	RGA	RGA	GGR	ANT	ANT	GGR	ANT	ANT	GGR	GGR	ANT	ANT	ANT	ANT	ANT	ANT	GGR
	Transcript evidence	Yes	Yes	No	Yes	Yes	NA	NA	Yes	NA	No	Yes	NA	NA	Yes	Yes	Yes	No
ASTEI05228	Category	RGA	RGA	GGR	ANT	ANT	GGR	ANT	ANT	GGR	GGR	ANT	ANT	ANT	ANT	ANT	ANT	GGR
	Transcript evidence	Yes	Yes	No	Yes	Yes	NA	NA	Yes	NA	No	Yes	NA	NA	Yes	Yes	Yes	No
ASTEI06327	Category	RGA	RGA	ANT	ANT	ANT	ANT	ANT	ANT	ANT	ANT	ANT	ANT	ANT	ANT	ANT	ANT	ANT
	Transcript evidence	No	Yes	Yes	Yes	Yes	NA	NA	Yes	NA	Yes	Yes	NA	NA	Yes	Yes	Yes	Yes
ASTEI08441	Category	RGA	RGA	RGA	RGA	ANT	RGA	ANT	RGA	ANT	RGA	RGA	RGA	RGA	RGA	RGA	RGA	RGA
	Transcript evidence	Yes	Yes	Yes	Yes	Yes	NA	NA	Yes	NA	Yes	Yes	NA	NA	Yes	Yes	Yes	Yes
ASTEI08657	Category	RGA	RGA	RGA	RGA	RGA	RGA	RGA	RGA	RGA	RGA	RGA	MGA	MGA	RGA	RGA	RGA	RGA
	Transcript evidence	Yes	Yes	Yes	Yes	Yes	NA	NA	Yes	NA	Yes	Yes	NA	NA	Yes	Yes	Yes	Yes
ASTEI08466	Category	RGA	ANT	ANT	RGA	ANT	MGA	RGA	ANT	ANT	RGA	RGA	RGA	RGA	ANT	ANT	RGA	RGA
	Transcript evidence	Yes	Yes	Yes	Yes	Yes	NA	NA	No	NA	Yes	Yes	NA	NA	Yes	Yes	Yes	Yes
ASTEI07540	Category	RGA	RGA	RGA	RGA	RGA	RGA	RGA	RGA	RGA	RGA	RGA	RGA	RGA	RGA	RGA	RGA	RGA
	Transcript evidence	Yes	Yes	Yes	Yes	Yes	NA	NA	Yes	NA	Yes	Yes	NA	NA	Yes	Yes	Yes	Yes
ASTEI07489	Category	RGA	RGA	RGA	RGA	RGA	RGA	RGA	RGA	RGA	RGA	RGA	ANT	RGA	RGA	RGA	MGA	ANT
	Transcript evidence	Yes	Yes	Yes	Yes	Yes	NA	NA	Yes	NA	Yes	Yes	NA	NA	Yes	Yes	Yes	Yes
ASTEI04562	Category	RGA	RGA	ANT	RGA	RGA	RGA	RGA	RGA	RGA	RGA	RGA	GSR	RGA	RGA	RGA	RGA	RGA
	Transcript evidence	Yes	Yes	Yes	Yes	Yes	NA	NA	Yes	NA	Yes	Yes	NA	NA	Yes	Yes	Yes	Yes
ASTEI04755	Category	RGA	RGA	RGA	RGA	RGA	RGA	RGA	RGA	RGA	RGA	RGA	MGA	RGA	RGA	RGA	RGA	RGA
	Transcript evidence	Yes	Yes	Yes	Yes	Yes	NA	NA	Yes	NA	Yes	Yes	NA	NA	Yes	Yes	Yes	Yes
ASTEI04762	Category	RGA	RGA	RGA	RGA	RGA	RGA	RGA	RGA	RGA	RGA	RGA	GSR	RGA	RGA	RGA	RGA	RGA
	Transcript evidence	Yes	Yes	Yes	Yes	Yes	NA	NA	Yes	NA	Yes	Yes	NA	NA	Yes	Yes	Yes	Yes
ASTEI04691	Category	RGA	RGA	RGA	RGA	RGA	RGA	RGA	RGA	RGA	RGA	RGA	RGA	RGA	RGA	RGA	RGA	RGA
	Transcript evidence	Yes	Yes	Yes	Yes	Yes	NA	NA	Yes	NA	Yes	Yes	NA	NA	Yes	Yes	Yes	Yes
ASTEI04790	Category	RGA	MGA	RGA	MGA	RGA	RGA	RGA	RGA	RGA	RGA	RGA	GSR	MGA	MGA	RGA	MGA	MGA
	Transcript evidence	Yes	No	Yes	Yes	Yes	NA	NA	Yes	NA	Yes	Yes	NA	NA	Yes	Yes	Yes	Yes
ASTEI05033	Category	RGA	RGA	RGA	RGA	RGA	RGA	RGA	RGA	RGA	RGA	RGA	GSR	RGA	RGA	RGA	RGA	RGA
	Transcript evidence	Yes	Yes	Yes	Yes	Yes	NA	NA	Yes	NA	Yes	Yes	NA	NA	Yes	Yes	Yes	Yes
ASTEI04804	Category	RGA	RGA	RGA	RGA	RGA	RGA	RGA	RGA	RGA	RGA	RGA	RGA	RGA	RGA	RGA	RGA	RGA
	Transcript evidence	No	No	Yes	Yes	Yes	NA	NA	Yes	NA	Yes	Yes	NA	NA	Yes	No	Yes	Yes
ASTEI04837	Category	RGA	RGA	RGA	RGA	RGA	RGA	RGA	RGA	RGA	RGA	RGA	GSR	RGA	RGA	RGA	RGA	RGA
	Transcript evidence	Yes	Yes	Yes	Yes	Yes	NA	NA	Yes	NA	Yes	Yes	NA	NA	No	Yes	No	No
ASTEI05135	Category	RGA	RGA	ANT	RGA	RGA	ANT	RGA	ANT	RGA	RGA	RGA	GSR	RGA	RGA	RGA	RGA	RGA
	Transcript evidence	Yes	Yes	Yes	Yes	Yes	NA	NA	Yes	NA	Yes	Yes	NA	NA	Yes	Yes	Yes	Yes
ASTEI04647	Category	RGA	RGA	ANT	RGA	RGA	MGA	RGA	RGA	RGA	RGA	RGA	MGA	RGA	RGA	RGA	RGA	RGA
	Transcript evidence	Yes	Yes	Yes	Yes	Yes	NA	NA	Yes	NA	Yes	Yes	NA	NA	Yes	Yes	Yes	Yes
ASTEI04867	Category	RGA	RGA	RGA	RGA	RGA	RGA	RGA	RGA	RGA	RGA	RGA	GSR	RGA	RGA	RGA	RGA	RGA
	Transcript evidence	Yes	Yes	Yes	Yes	Yes	NA	NA	Yes	NA	Yes	Yes	NA	NA	Yes	Yes	Yes	Yes
ASTEI04954	Category	RGA	RGA	RGA	RGA	ANT	RGA	RGA	RGA	RGA	RGA	RGA	RGA	RGA	RGA	RGA	RGA	ANT
	Transcript evidence	Yes	Yes	Yes	Yes	Yes	NA	NA	Yes	NA	Yes	Yes	NA	NA	Yes	Yes	Yes	Yes
ASTEI05074	Category	RGA	RGA	ANT	ANT	RGA	ANT	RGA	ANT	ANT	RGA	RGA	GSR	ANT	RGA	RGA	ANT	ANT
	Transcript evidence	Yes	Yes	Yes	Yes	Yes	NA	NA	Yes	NA	Yes	Yes	NA	NA	Yes	Yes	Yes	Yes
ASTEI04748	Category	RGA	RGA	RGA	RGA	RGA	MGA	RGA	RGA	RGA	RGA	RGA	RGA	RGA	RGA	RGA	RGA	RGA
	Transcript evidence	Yes	Yes	Yes	Yes	Yes	NA	NA	Yes	NA	Yes	Yes	NA	NA	Yes	Yes	Yes	Yes
ASTEI05123	Category	RGA	RGA	RGA	RGA	RGA	ANT	RGA	RGA	RGA	RGA	RGA	MGA	RGA	RGA	RGA	RGA	RGA
	Transcript evidence	Yes	Yes	Yes	Yes	Yes	NA	NA	Yes	NA	Yes	Yes	NA	NA	Yes	Yes	Yes	Yes
ASTEI04597; ASTEI04598	Category	RGA	RGA	RGA	RGA	RGA	ANT	ANT	RGA	RGA	RGA	RGA	GSR	RGA	RGA	RGA	RGA	RGA
	Transcript evidence	Yes	Yes	Yes	Yes	Yes	NA	NA	No	NA	Yes	Yes	NA	NA	Yes	Yes	Yes	Yes
ASTEI04708; ASTEI04709	Category	RGA	RGA	RGA	RGA	RGA	RGA	RGA	RGA	RGA	RGA	RGA	ANT	GSR	RGA	RGA	RGA	RGA
	Transcript evidence	Yes	Yes	Yes	Yes	Yes	NA	NA	Yes	NA	Yes	Yes	NA	NA	Yes	Yes	Yes	Yes
ASTEI05024; ASTEI05025	Category	RGA	RGA	RGA	RGA	RGA	RGA	RGA	RGA	RGA	RGA	RGA	RGA	ANT	RGA	RGA	RGA	RGA
	Transcript evidence	Yes	Yes	Yes	Yes	Yes	NA	NA	Yes	NA	Yes	Yes	NA	NA	Yes	Yes	Yes	Yes
ASTEI04988; ASTEI04989; ASTEI04990; ASTEI04991	Category	RGA	RGA	RGA	RGA	RGA	ANT	RGA	RGA	RGA	RGA	RGA	RGA	ANT	RGA	RGA	RGA	RGA
	Transcript evidence	Yes	Yes	Yes	Yes	Yes	NA	NA	Yes	NA	Yes	Yes	NA	NA	Yes	Yes	Yes	Yes
ASTEI04946, ASTEI04947	Category	RGA	RGA	RGA	RGA	RGA	RGA	RGA	RGA	RGA	RGA	RGA	GSR	RGA	RGA	RGA	RGA	RGA
	Transcript evidence	Yes	Yes	Yes	Yes	Yes	NA	NA	Yes	NA	Yes	Yes	NA	NA	Yes	Yes	Yes	Yes
ASTEI03906	Category	RGA	ANT	ANT	ANT	RGA	MGA	RGA	ANT	RGA	ANT	ANT	RGA	GSR	RGA	RGA	ANT	RGA
	Transcript evidence	Yes	Yes	Yes	Yes	Yes	NA	NA	Yes	NA	Yes	Yes	NA	NA	Yes	Yes	Yes	Yes
ASTEI07490	Category	RGA	RGA	ANT	RGA	RGA	ANT	RGA	ANT	ANT	ANT	RGA	RGA	RGA	ANT	RGA	ANT	ANT
	Transcript evidence	Yes	Yes	No	Yes	Yes	NA	NA	Yes	NA	Yes	Yes	NA	NA	Yes	Yes	Yes	Yes
ASTEI07561	Category	RGA	RGA	ANT	RGA	RGA	RGA	RGA	RGA	RGA	RGA	RGA	RGA	ANT	ANT	RGA	RGA	RGA
	Transcript evidence	Yes	Yes	Yes	Yes	Yes	NA	NA	Yes	NA	Yes	Yes	NA	NA	Yes	Yes	Yes	Yes
ASTEI07618	Category	RGA	ANT	ANT	RGA	RGA	ANT	RGA	RGA	RGA	RGA	ANT	ANT	RGA	RGA	RGA	RGA	RGA
	Transcript evidence	Yes	Yes	Yes	Yes	Yes	NA	NA	Yes	NA	Yes	Yes	NA	NA	Yes	Yes	Yes	Yes
ASTEI08159	Category	RGA	RGA	ANT	RGA	ANT	RGA	RGA	RGA	RGA	RGA	RGA	RGA	ANT	RGA	RGA	ANT	RGA
	Transcript evidence	Yes	Yes	Yes	Yes	Yes	NA	NA	Yes	NA	Yes	Yes	NA	NA	Yes	Yes	Yes	Yes
ASTEI07287	Category	RGA	RGA	ANT	RGA	RGA	RGA	RGA	RGA	RGA	RGA	RGA	GGR	RGA	RGA	ANT	RGA	MGA
	Transcript evidence	Yes	Yes	Yes	Yes	Yes	NA	NA	Yes	NA	Yes	No	NA	NA	Yes	Yes	Yes	Yes
ASTEI07239	Category	RGA	ANT	RGA	RGA	ANT	ANT	ANT	ANT	ANT	ANT	RGA	GSR	ANT	ANT	ANT	ANT	ANT
	Transcript evidence	Yes	Yes	Yes	Yes	Yes	NA	NA	Yes	NA	Yes	Yes	NA	NA	Yes	Yes	Yes	Yes
ASTEI07259	Category	RGA	ANT	ANT	RGA	ANT	ANT	ANT	ANT	ANT	ANT	ANT	ANT	ANT	ANT	GSR	ANT	ANT
	Transcript evidence	Yes	Yes	Yes	Yes	Yes	NA	NA	Yes	NA	Yes	Yes	NA	NA	Yes	No	Yes	Yes
ASTEI07319	Category	RGA	ANT	ANT	ANT	ANT	ANT	ANT	ANT	ANT	RGA	ANT	GGR	ANT	ANT	ANT	ANT	ANT
	Transcript evidence	Yes	Yes	Yes	Yes	Yes	NA	NA	Yes	NA	Yes	Yes	NA	NA	Yes	Yes	Yes	Yes
ASTEI02774	Category	RGA	ANT	ANT	RGA	RGA	ANT	RGA	ANT	RGA	RGA	RGA	GSR	RGA	RGA	ANT	ANT	ANT
	Transcript evidence	Yes	Yes	Yes	Yes	Yes	NA	NA	Yes	NA	Yes	Yes	NA	NA	Yes	Yes	Yes	Yes
ASTEI02969	Category	RGA	RGA	RGA	RGA	RGA	MGA	ANT	RGA	RGA	RGA	RGA	GSR	RGA	ANT	RGA	RGA	ANT
	Transcript evidence	Yes	Yes	Yes	Yes	Yes	NA	NA	Yes	NA	Yes	Yes	NA	NA	Yes	Yes	Yes	Yes
ASTEI03053	Category	RGA	ANT	ANT	ANT	ANT	GGR	ANT	ANT	ANT	RGA	ANT	RGA	RGA	RGA	RGA	ANT	ANT
	Transcript evidence	Yes	Yes	Yes	Yes	Yes	NA	NA	Yes	NA	Yes	Yes	NA	NA	No	Yes	Yes	Yes
AASTEI03067	Category	RGA	ANT	ANT	ANT	RGA	RGA	ANT	ANT	ANT	ANT	RGA	ANT	ANT	ANT	ANT	ANT	ANT
	Transcript evidence	Yes	Yes	Yes	Yes	Yes	NA	NA	Yes	NA	Yes	Yes	NA	NA	Yes	Yes	Yes	Yes
ASTEI03156	Category	RGA	RGA	RGA	RGA	ANT	RGA	RGA	RGA	RGA	ANT	RGA	GGR	RGA	RGA	RGA	RGA	ANT
	Transcript evidence	Yes	Yes	Yes	Yes	Yes	NA	NA	Yes	NA	Yes	Yes	NA	NA	Yes	Yes	Yes	Yes
ASTEI03189	Category	RGA	RGA	ANT	ANT	ANT	RGA	RGA	ANT	ANT	RGA	RGA	ANT	ANT	ANT	RGA	RGA	ANT
	Transcript evidence	Yes	Yes	Yes	Yes	Yes	NA	NA	Yes	NA	Yes	Yes	NA	NA	Yes	Yes	Yes	Yes
ASTEI02733	Category	RGA	RGA	RGA	RGA	RGA	GGR	RGA	RGA	RGA	RGA	RGA	GSR	RGA	RGA	RGA	RGA	RGA
	Transcript evidence	Yes	Yes	Yes	Yes	Yes	NA	NA	Yes	NA	Yes	Yes	NA	NA	Yes	Yes	Yes	Yes
ASTEI09057	Category	RGA	RGA	ANT	ANT	ANT	ANT	ANT	ANT	RGA	RGA	ANT	ANT	MGA	ANT	ANT	RGA	ANT
	Transcript evidence	Yes	Yes	Yes	Yes	Yes	NA	NA	Yes	NA	Yes	Yes	NA	NA	Yes	Yes	Yes	Yes
ASTEI09054	Category	RGA	RGA	ANT	ANT	RGA	MGA	RGA	RGA	ANT	ANT	ANT	RGA	RGA	RGA	ANT	ANT	RGA
	Transcript evidence	Yes	Yes	Yes	Yes	Yes	NA	NA	Yes	NA	Yes	Yes	NA	NA	Yes	Yes	Yes	Yes
ASTEI04541	Category	RGA	RGA	RGA	RGA	ANT	MGA	RGA	RGA	MGA	RGA	RGA	RGA	RGA	RGA	RGA	MGA	RGA
	Transcript evidence	Yes	Yes	Yes	Yes	Yes	NA	NA	Yes	NA	Yes	Yes	NA	NA	Yes	Yes	Yes	Yes
ASTEI04229	Category	RGA	ANT	ANT	ANT	RGA	ANT	RGA	RGA	ANT	GGR	GGR	ANT	RGA	RGA	ANT	ANT	GGR
	Transcript evidence	Yes	Yes	Yes	Yes	Yes	NA	NA	Yes	NA	No	No	NA	NA	Yes	Yes	Yes	No
ASTEI03947	Category	RGA	RGA	ANT	RGA	RGA	ANT	RGA	ANT	ANT	RGA	ANT	RGA	RGA	RGA	ANT	RGA	RGA
	Transcript evidence	Yes	Yes	Yes	Yes	Yes	NA	NA	Yes	NA	Yes	Yes	NA	NA	Yes	Yes	Yes	Yes
ASTEI10995	Category	RGA	RGA	RGA	RGA	RGA	RGA	RGA	MGA	RGA	RGA	RGA	MGA	RGA	RGA	RGA	RGA	MGA
	Transcript evidence	Yes	Yes	Yes	Yes	Yes	NA	NA	Yes	NA	Yes	Yes	NA	NA	Yes	Yes	Yes	Yes
ASTEI01441	Category	RGA	RGA	ANT	RGA	RGA	RGA	RGA	RGA	ANT	RGA	RGA	ANT	RGA	RGA	RGA	RGA	RGA
	Transcript evidence	Yes	Yes	Yes	Yes	Yes	NA	NA	Yes	NA	Yes	Yes	NA	NA	Yes	Yes	Yes	Yes
ASTEI01550	Category	RGA	ANT	ANT	ANT	ANT	ANT	ANT	ANT	RGA	ANT	ANT	ANT	ANT	RGA	ANT	ANT	ANT
	Transcript evidence	Yes	Yes	Yes	Yes	Yes	NA	NA	Yes	NA	Yes	Yes	NA	NA	Yes	Yes	Yes	Yes
ASTEI00886	Category	RGA	ANT	RGA	RGA	RGA	ANT	ANT	RGA	MGA	ANT	RGA	RGA	RGA	RGA	ANT	RGA	RGA
	Transcript evidence	Yes	Yes	Yes	Yes	No	NA	NA	Yes	NA	Yes	Yes	NA	NA	Yes	Yes	Yes	Yes
ASTEI01011	Category	RGA	RGA	ANT	RGA	ANT	MGA	RGA	ANT	ANT	RGA	RGA	ANT	ANT	ANT	ANT	ANT	ANT
	Transcript evidence	Yes	Yes	Yes	Yes	Yes	NA	NA	Yes	NA	Yes	Yes	NA	NA	Yes	Yes	Yes	Yes
ASTEI01538	Category	RGA	RGA	RGA	RGA	RGA	RGA	RGA	RGA	RGA	RGA	RGA	RGA	RGA	RGA	RGA	RGA	ANT
	Transcript evidence	Yes	Yes	Yes	Yes	Yes	NA	NA	Yes	NA	Yes	Yes	NA	NA	Yes	Yes	Yes	Yes
ASTEI01570	Category	RGA	RGA	ANT	RGA	ANT	ANT	ANT	ANT	ANT	MGA	RGA	ANT	RGA	RGA	ANT	RGA	ANT
	Transcript evidence	Yes	Yes	Yes	Yes	Yes	NA	NA	Yes	NA	Yes	Yes	NA	NA	Yes	Yes	Yes	Yes
ASTEI01621	Category	RGA	ANT	GGR	ANT	GGR	ANT	ANT	ANT	ANT	ANT	ANT	ANT	ANT	ANT	ANT	ANT	GGR
	Transcript evidence	Yes	Yes	No	Yes	No	NA	NA	Yes	NA	Yes	Yes	NA	NA	Yes	Yes	Yes	No
ASTEI01279	Category	RGA	ANT	GGR	MGA	MGA	MGA	MGA	MGA	MGA	ANT	ANT	MGA	RGA	RGA	ANT	MGA	GGR
	Transcript evidence	No	Yes	No	No	Yes	NA	NA	Yes	NA	Yes	Yes	NA	NA	Yes	Yes	Yes	No
ASTEI04121	Category	RGA	RGA	ANT	RGA	RGA	RGA	RGA	RGA	RGA	RGA	ANT	GGR	RGA	RGA	ANT	RGA	ANT
	Transcript evidence	Yes	Yes	Yes	Yes	Yes	NA	NA	Yes	NA	Yes	Yes	NA	NA	Yes	Yes	Yes	No
ASTEI04128	Category	RGA	ANT	RGA	ANT	ANT	RGA	ANT	RGA	ANT	ANT	ANT	ANT	ANT	ANT	ANT	RGA	ANT
	Transcript evidence	Yes	Yes	Yes	Yes	Yes	NA	NA	Yes	NA	Yes	Yes	NA	NA	Yes	Yes	Yes	No
ASTEI05742	Category	RGA	ANT	MGA	ANT	MGA	ANT	ANT	RGA	MGA	RGA	ANT	MGA	ANT	ANT	ANT	ANT	MGA
	Transcript evidence	Yes	Yes	No	Yes	No	NA	NA	Yes	NA	Yes	Yes	NA	NA	Yes	Yes	Yes	Yes
ASTEI11552	Category	RGA	RGA	ANT	ANT	MGA	ANT	RGA	ANT	ANT	MGA	ANT	GGR	GGR	GGR	ANT	ANT	MGA
	Transcript evidence	Yes	Yes	Yes	Yes	Yes	NA	NA	Yes	NA	Yes	Yes	NA	NA	No	Yes	Yes	Yes
ASTEI11056	Category	RGA	RGA	ANT	ANT	ANT	RGA	RGA	ANT	RGA	ANT	ANT	RGa	RGA	ANT	RGA	ANT	ANT
	Transcript evidence	Yes	Yes	Yes	Yes	Yes	NA	NA	Yes	NA	Yes	Yes	NA	NA	Yes	Yes	Yes	Yes
ASTEI03028	Category	RGA	RGA	ANT	MGA	RGA	GGR	RGA	MGA	RGA	RGA	RGA	GGR	GGR	RGA	MGA	MGA	GGR
	Transcript evidence	Yes	Yes	Yes	Yes	Yes	NA	NA	Yes	NA	Yes	Yes	NA	NA	Yes	Yes	Yes	No
ASTEI02861	Category	RGA	RGA	RGA	RGA	RGA	RGA	RGA	RGA	RGA	ANT	RGA	RGA	RGA	RGA	RGA	RGA	RGA
	Transcript evidence	Yes	Yes	Yes	Yes	Yes	NA	NA	Yes	NA	Yes	Yes	NA	NA	Yes	Yes	Yes	Yes
ASTEI02772	Category	RGA	RGA	RGA	RGA	RGA	RGA	RGA	RGA	RGA	RGA	RGA	GSR	RGA	RGA	RGA	RGA	RGA
	Transcript evidence	Yes	Yes	Yes	Yes	Yes	NA	NA	Yes	NA	Yes	Yes	NA	NA	Yes	Yes	Yes	Yes
ASTEI04238	Category	RGA	ANT	ANT	ANT	RGA	ANT	RGA	ANT	ANT	ANT	ANT	GGR	RGA	ANT	ANT	ANT	ANT
	Transcript evidence	Yes	Yes	Yes	Yes	Yes	NA	NA	Yes	NA	Yes	Yes	NA	NA	Yes	Yes	Yes	Yes
ASTEI02702	Category	RGA	ANT	RGA	RGA	ANT	ANT	ANT	ANT	ANT	RGA	ANT	RGA	ANT	RGA	RGA	RGA	ANT
	Transcript evidence	Yes	Yes	Yes	Yes	Yes	NA	NA	Yes	NA	Yes	Yes	NA	NA	Yes	Yes	Yes	Yes
ASTEI04491	Category	RGA	RGA	RGA	RGA	ANT	RGA	RGA	RGA	RGA	ANT	RGA	RGA	RGA	RGA	RGA	RGA	ANT
	Transcript evidence	Yes	Yes	Yes	Yes	Yes	NA	NA	Yes	NA	Yes	Yes	NA	NA	Yes	Yes	Yes	Yes
ASTEI03953	Category	RGA	RGA	RGA	RGA	RGA	RGA	ANT	RGA	ANT	RGA	ANT	RGA	ANT	RGA	RGA	RGA	RGA
	Transcript evidence	Yes	Yes	Yes	Yes	Yes	NA	NA	Yes	NA	Yes	Yes	NA	NA	Yes	Yes	Yes	Yes
ASTEI03025	Category	RGA	RGA	ANT	RGA	ANT	GGR	RGA	RGA	RGA	RGA	RGA	RGA	RGA	RGA	ANT	RGA	RGA
	Transcript evidence	Yes	Yes	Yes	Yes	Yes	NA	NA	Yes	NA	Yes	Yes	NA	NA	Yes	Yes	Yes	Yes
ASTEI03616	Category	RGA	RGA	RGA	ANT	ANT	RGA	RGA	ANT	ANT	ANT	RGA	GGR	ANT	RGA	RGA	RGA	GSR
	Transcript evidence	Yes	Yes	Yes	Yes	Yes	NA	NA	Yes	NA	Yes	Yes	NA	NA	Yes	Yes	Yes	No
ASTEI11241	Category	RGA	ANT	ANT	ANT	RGA	MGA	RGA	RGA	ANT	ANT	ANT	MGA	RGA	RGA	ANT	ANT	RGA
	Transcript evidence	Yes	Yes	Yes	Yes	Yes	NA	NA	Yes	NA	Yes	Yes	NA	NA	Yes	Yes	Yes	Yes
ASTEI07389	Category	RGA	RGA	ANT	ANT	RGA	MGA	RGA	ANT	ANT	RGA	ANT	MGA	ANT	RGA	ANT	MGA	RGA
	Transcript evidence	Yes	Yes	Yes	Yes	Yes	NA	NA	Yes	NA	Yes	Yes	NA	NA	Yes	Yes	Yes	Yes
ASTEI07464	Category	RGA	ANT	ANT	ANT	ANT	ANT	ANT	ANT	ANT	ANT	ANT	GSR	GSR	RGA	ANT	ANT	ANT
	Transcript evidence	Yes	Yes	Yes	Yes	Yes	NA	NA	Yes	NA	Yes	Yes	NA	NA	Yes	Yes	Yes	Yes
ASTEI07419	Category	RGA	RGA	RGA	RGA	GGR	RGA	RGA	RGA	RGA	RGA	RGA	GSR	GSR	RGA	RGA	RGA	GGR
	Transcript evidence	Yes	Yes	Yes	Yes	No	NA	NA	Yes	NA	Yes	Yes	NA	NA	Yes	Yes	Yes	No
ASTEI10005	Category	RGA	RGA	ANT	ANT	ANT	RGA	RGA	RGA	ANT	MGA	RGA	MGA	RGA	ANT	RGA	ANT	ANT
	Transcript evidence	Yes	Yes	Yes	Yes	Yes	NA	NA	Yes	NA	Yes	Yes	NA	NA	Yes	Yes	Yes	Yes
ASTEI06868	Category	RGA	RGA	GGR	RGA	RGA	GGR	RGA	RGA	RGA	ANT	RGA	RGA	GGR	RGA	RGA	GGR	RGA
	Transcript evidence	Yes	Yes	No	Yes	Yes	NA	NA	Yes	NA	Yes	Yes	NA	NA	Yes	Yes	No	Yes
ASTEI03065	Category	RGA	ANT	ANT	ANT	ANT	ANT	MGA	ANT	ANT	ANT	ANT	ANT	ANT	ANT	ANT	ANT	ANT
	Transcript evidence	No	No	No	No	Yes	NA	NA	Yes	NA	Yes	No	NA	NA	Yes	No	No	No
ASTEI03426	Category	RGA	RGA	RGA	RGA	ANT	RGA	ANT	RGA	RGA	ANT	RGA	RGA	RGA	ANT	RGA	RGA	ANT
	Transcript evidence	No	No	No	No	No	NA	NA	No	NA	Yes	Yes	NA	NA	Yes	Yes	No	Yes
ASTEI10335	Category	RGA	ANT	ANT	ANT	ANT	ANT	RGA	ANT	RGA	ANT	ANT	RGA	RGA	ANT	ANT	ANT	ANT
	Transcript evidence	No	Yes	Yes	Yes	Yes	NA	NA	Yes	NA	Yes	Yes	NA	NA	Yes	Yes	Yes	Yes
ASTEI06800	Category	RGA	RGA	RGA	RGA	GGR	MGA	MGA	RGA	RGA	RGA	RGA	MGA	MGA	RGA	RGA	MGA	RGA
	Transcript evidence	Yes	Yes	Yes	Yes	No	NA	NA	Yes	NA	Yes	Yes	NA	NA	Yes	Yes	Yes	Yes
ASTEI06994	Category	RGA	RGA	RGA	RGA	RGA	MGA	RGA	RGA	RGA	RGA	RGA	MGA	RGA	RGA	RGA	RGA	GGR
	Transcript evidence	Yes	Yes	Yes	Yes	Yes	NA	NA	Yes	NA	Yes	Yes	NA	NA	Yes	Yes	Yes	No
ASTEI10074	Category	RGA	RGA	ANT	RGA	MGA	ANT	RGA	ANT	RGA	ANT	RGA	MGA	ANT	RGA	RGA	RGA	ANT
	Transcript evidence	Yes	Yes	Yes	Yes	Yes	NA	NA	Yes	NA	Yes	Yes	NA	NA	Yes	Yes	Yes	Yes
ASTEI10144	Category	RGA	RGA	ANT	RGA	ANT	MGA	RGA	RGA	ANT	ANT	RGA	RGA	RGA	RGA	RGA	RGA	RGA
	Transcript evidence	Yes	Yes	Yes	Yes	Yes	NA	NA	Yes	NA	Yes	Yes	NA	NA	Yes	Yes	Yes	Yes
ASTEI10232	Category	RGA	RGA	GGR	RGA	RGA	GGR	GGR	GGR	GGR	GGR	GGR	GGR	GGR	GGR	RGA	GGR	RGA
	Transcript evidence	Yes	Yes	No	Yes	Yes	NA	NA	No	NA	No	No	NA	NA	No	Yes	No	No
ASTEI10252	Category	RGA	ANT	ANT	ANT	ANT	ANT	ANT	ANT	ANT	RGA	ANT	ANT	GGR	ANT	ANT	MGA	ANT
	Transcript evidence	Yes	Yes	Yes	Yes	Yes	NA	NA	Yes	NA	Yes	Yes	NA	NA	Yes	Yes	Yes	Yes
ASTEI10278	Category	RGA	ANT	RGA	RGA	RGA	MGA	RGA	ANT	RGA	RGA	ANT	GGR	MGA	RGA	ANT	RGA	RGA
	Transcript evidence	Yes	Yes	Yes	Yes	Yes	NA	NA	Yes	NA	Yes	Yes	NA	NA	Yes	Yes	Yes	Yes
ASTEI10045	Category	RGA	ANT	ANT	ANT	RGA	ANT	ANT	RGA	ANT	ANT	ANT	ANT	ANT	ANT	ANT	ANT	ANT
	Transcript evidence	Yes	Yes	Yes	Yes	Yes	NA	NA	Yes	NA	Yes	Yes	NA	NA	Yes	Yes	Yes	Yes
ASTEI06730	Category	RGA	RGA	GGR	GGR	GGR	GGR	RGA	GGR	RGA	GGR	GGR	RGA	GGR	GGR	RGA	GGR	GGR
	Transcript evidence	Yes	Yes	No	No	No	NA	NA	No	NA	No	No	NA	NA	No	Yes	No	No
ASTEI09253	Category	RGA	ANT	GGR	ANT	ANT	ANT	GGR	GGR	GGR	GGR	ANT	GGR	MGA	MGA	ANT	GGR	GGR
	Transcript evidence	Yes	Yes	No	Yes	Yes	NA	NA	No	NA	No	Yes	NA	NA	Yes	Yes	No	No
ASTEI03576	Category	RGA	ANT	GGR	ANT	RGA	GGR	GGR	ANT	ANT	ANT	ANT	GGR	ANT	ANT	ANT	ANT	GGR
	Transcript evidence	Yes	Yes	No	Yes	Yes	NA	NA	Yes	NA	Yes	Yes	NA	NA	Yes	Yes	Yes	No
ASTEI05606	Category	RGA	RGA	GGR	GGR	GGR	RGA	GGR	GGR	GGR	GGR	RGA	RGA	GGR	GGR	GGR	GGR	GGR
	Transcript evidence	Yes	No	No	No	No	NA	NA	No	NA	No	Yes	NA	NA	No	No	No	No
ASTEI03959	Category	RGA	RGA	RGA	RGA	RGA	RGA	RGA	RGA	RGA	ANT	RGA	RGA	RGA	RGA	RGA	RGA	ANT
	Transcript evidence	Yes	Yes	Yes	Yes	Yes	NA	NA	Yes	NA	Yes	Yes	NA	NA	Yes	Yes	Yes	Yes
ASTEI04120	Category	RGA	MGA	RGA	ANT	RGA	ANT	RGA	RGA	MGA	MGA	MGA	MGA	MGA	RGA	MGA	MGA	MGA
	Transcript evidence	Yes	Yes	Yes	Yes	Yes	NA	NA	Yes	NA	Yes	Yes	NA	NA	Yes	Yes	Yes	Yes
ASTEI05054	Category	RGA	RGA	RGA	RGA	RGA	GGR	RGA	RGA	RGA	RGA	RGA	GSR	RGA	RGA	RGA	RGA	ANT
	Transcript evidence	Yes	Yes	Yes	Yes	Yes	NA	NA	Yes	NA	Yes	Yes	NA	NA	Yes	Yes	Yes	Yes
ASTEI07672	Category	RGA	RGA	MGA	GGR	GGR	GGR	ANT	ANT	MGA	GGR	GGR	MGA	GGR	GGR	ANT	GGR	RGA
	Transcript evidence	Yes	Yes	Yes	No	No	NA	NA	Yes	NA	No	No	NA	NA	No	Yes	No	Yes
ASTEI08493	Category	RGA	MGA	MGA	MGA	ANT	MGA	ANT	MGA	MGA	ANT	MGA	ANT	ANT	ANT	MGA	MGA	GGR
	Transcript evidence	Yes	Yes	Yes	Yes	Yes	NA	NA	Yes	NA	Yes	Yes	NA	NA	Yes	Yes	Yes	No
ASTEI08328	Category	RGA	ANT	ANT	ANT	ANT	ANT	ANT	ANT	ANT	ANT	ANT	ANT	ANT	ANT	ANT	ANT	ANT
	Transcript evidence	Yes	Yes	Yes	Yes	Yes	NA	NA	Yes	NA	Yes	Yes	NA	NA	Yes	Yes	Yes	Yes
ASTEI05596	Category	RGA	MGA	MGA	MGA	MGA	MGA	MGA	GGR	RGA	MGA	MGA	MGA	MGA	MGA	MGA	MGA	MGA
	Transcript evidence	Yes	Yes	Yes	Yes	Yes	NA	NA	No	NA	Yes	Yes	NA	NA	Yes	Yes	Yes	Yes
ASTEI11019	Category	RGA	GGR	ANT	RGA	ANT	ANT	MGA	GGR	GGR	RGA	ANT	GGR	GGR	GGR	ANT	RGA	RGA
	Transcript evidence	Yes	No	Yes	Yes	Yes	NA	NA	No	NA	Yes	Yes	NA	NA	No	Yes	Yes	Yes
ASTEI11035	Category	RGA	RGA	ANT	RGA	ANT	RGA	RGA	RGA	RGA	ANT	RGA	RGA	RGA	RGA	ANT	RGA	ANT
	Transcript evidence	Yes	Yes	Yes	Yes	Yes	NA	NA	Yes	NA	Yes	Yes	NA	NA	Yes	Yes	Yes	Yes
ASTEI11212	Category	RGA	RGA	RGA	GGR	GGR	GGR	ANT	ANT	GGR	RGA	ANT	GGR	GGR	GGR	ANT	GGR	GSR
	Transcript evidence	Yes	Yes	Yes	No	No	NA	NA	Yes	NA	Yes	Yes	NA	NA	No	Yes	No	No
ASTEI11037	Category	RGA	RGA	ANT	ANT	RGA	ANT	ANT	ANT	ANT	MGA	ANT	GGR	RGA	ANT	ANT	ANT	RGA
	Transcript evidence	Yes	Yes	Yes	Yes	Yes	NA	NA	Yes	NA	Yes	Yes	NA	NA	Yes	Yes	Yes	Yes
ASTEI05720	category	RGA	RGA	RGA	ANT	ANT	ANT	ANT	RGA	ANT	RGA	ANT	ANT	RGA	ANT	ANT	ANT	ANT
	Transcript evidence	Yes	Yes	Yes	Yes	Yes	NA	NA	Yes	NA	Yes	Yes	NA	NA	Yes	Yes	Yes	Yes
ASTEI04473	category	RGA	ANT	GGR	MGA	GGR	MGA	ANT	ANT	GGR	MGA	ANT	ANT	RGA	GGR	ANT	MGA	GGR
	Transcript evidence	Yes	Yes	No	Yes	No	NA	NA	Yes	NA	Yes	No	NA	NA	No	Yes	Yes	No
ASTEI04373	category	RGA	RGA	RGA	RGA	ANT	RGA	RGA	RGA	RGA	RGA	RGA	RGA	RGA	RGA	RGA	RGA	RGA
	Transcript evidence	Yes	Yes	Yes	Yes	Yes	NA	NA	Yes	NA	Yes	No	NA	NA	Yes	Yes	Yes	Yes
ASTEI00212	Category	RGA	RGA	RGA	RGA	RGA	RGA	RGA	ANT	RGA	RGA	RGA	RGA	RGA	RGA	RGA	RGA	RGA
	Transcript evidence	Yes	Yes	Yes	Yes	Yes	NA	NA	Yes	NA	Yes	Yes	NA	NA	Yes	Yes	Yes	Yes
ASTEI00096	Category	RGA	RGA	ANT	ANT	ANT	ANT	ANT	ANT	ANT	ANT	ANT	GSR	ANT	ANT	RGA	ANT	RGA
	Transcript evidence	Yes	Yes	Yes	Yes	Yes	NA	NA	Yes	NA	Yes	Yes	NA	NA	Yes	Yes	Yes	Yes
ASTEI01884 (ge)	Category	RGA	RGA	ANT	RGA	RGA	RGA	RGA	RGA	RGA	RGA	RGA	GSR	RGA	RGA	RGA	RGA	ANT
	Transcript evidence	Yes	No	Yes	Yes	Yes	NA	NA	Yes	NA	Yes	Yes	NA	NA	Yes	Yes	Yes	Yes
ASTEI02183 (ge)	Category	RGA	ANT	ANT	ANT	ANT	ANT	ANT	ANT	ANT	ANT	ANT	GGR	ANT	ANT	ANT	ANT	MGA
	Transcript evidence	Yes	Yes	Yes	Yes	Yes	NA	NA	Yes	NA	Yes	Yes	NA	NA	Yes	Yes	Yes	Yes
ASTEI08922	Category	RGA	RGA	RGA	ANT	RGA	ANT	ANT	ANT	RGA	RGA	RGA	GSR	RGA	RGA	RGA	RGA	RGA
	Transcript evidence	Yes	Yes	Yes	Yes	Yes	NA	NA	Yes	NA	Yes	Yes	NA	NA	Yes	Yes	Yes	Yes
ASTEI11192	Category	RGA	RGA	RGA	RGA	RGA	RGA	RGA	RGA	RGA	RGA	RGA	RGA	RGA	RGA	RGA	RGA	RGA
	Transcript evidence	Yes	Yes	Yes	Yes	Yes	NA	NA	Yes	NA	Yes	Yes	NA	NA	Yes	Yes	Yes	Yes
ASTEI04214	Category	RGA	ANT	MGA	ANT	MGA	RGA	RGA	ANT	RGA	ANT	RGA	GGR	RGA	ANT	RGA	RGA	MGA
	Transcript evidence	Yes	Yes	Yes	Yes	Yes	NA	NA	Yes	NA	Yes	No	NA	NA	Yes	Yes	Yes	Yes
ASTEI01766	Category	RGA	RGA	RGA	RGA	RGA	RGA	ANT	RGA	ANT	RGA	RGA	ANT	ANT	ANT	RGA	RGA	RGA
	Transcript evidence	Yes	Yes	Yes	Yes	Yes	NA	NA	Yes	NA	Yes	Yes	NA	NA	Yes	Yes	Yes	Yes
ASTEI01750	Category	RGA	ANT	ANT	ANT	ANT	ANT	ANT	ANT	ANT	ANT	ANT	ANT	ANT	ANT	ANT	ANT	ANT
	Transcript evidence	Yes	Yes	Yes	Yes	Yes	NA	NA	Yes	NA	Yes	Yes	NA	NA	Yes	Yes	Yes	Yes
ASTEI01316	Category	RGA	RGA	ANT	ANT	ANT	RGA	RGA	ANT	RGA	ANT	RGA	RGA	RGA	ANT	RGA	RGA	ANT
	Transcript evidence	Yes	Yes	Yes	Yes	Yes	NA	NA	Yes	NA	Yes	Yes	NA	NA	Yes	Yes	Yes	Yes
ASTEI01456	Category	RGA	RGA	ANT	RGA	RGA	RGA	RGA	RGA	RGA	RGA	RGA	GGR	RGA	RGA	RGA	ANT	RGA
	Transcript evidence	Yes	Yes	Yes	Yes	No	NA	NA	Yes	NA	Yes	Yes	NA	NA	Yes	Yes	Yes	Yes
ASTEI02191	Category	RGA	ANT	GGR	GGR	GGR	GGR	GGR	GGR	GGR	GGR	GGR	GSR	GGR	GGR	GGR	GGR	GGR
	Transcript evidence	Yes	Yes	No	No	No	NA	NA	No	NA	No	No	NA	NA	No	No	No	No
ASTEI04003	Category	RGA	RGA	RGA	RGA	ANT	GSR	RGA	RGA	MGA	RGA	RGA	GSR	RGA	RGA	RGA	MGA	RGA
	Transcript evidence	Yes	Yes	Yes	Yes	Yes	NA	NA	Yes	NA	Yes	Yes	NA	NA	Yes	Yes	Yes	Yes
ASTEI02638	Category	RGA	RGA	RGA	MGA	RGA	GGR	GSR	RGA	RGA	RGA	MGA	GSR	GSR	GSR	RGA	MGA	GGR
	Transcript evidence	Yes	Yes	Yes	Yes	Yes	NA	NA	Yes	NA	Yes	Yes	NA	NA	No	Yes	Yes	No
ASTEI05604	Category	RGA	RGA	RGA	MGA	MGA	RGA	RGA	RGA	RGA	RGA	RGA	MGA	ANT	RGA	RGA	RGA	RGA
	Transcript evidence	Yes	Yes	Yes	Yes	Yes	NA	NA	Yes	NA	Yes	Yes	NA	NA	Yes	Yes	Yes	Yes
ASTEI09248	Category	RGA	RGA	MGA	RGA	RGA	RGA	RGA	RGA	RGA	RGA	RGA	GSR	RGA	RGA	RGA	RGA	RGA
	Transcript evidence	Yes	Yes	Yes	Yes	Yes	NA	NA	Yes	NA	Yes	Yes	NA	NA	Yes	Yes	Yes	Yes
ASTEI05373	Category	RGA	RGA	RGA	RGA	RGA	MGA	RGA	RGA	RGA	RGA	RGA	GSR	RGA	RGA	RGA	RGA	GGR
	Transcript evidence	Yes	Yes	Yes	Yes	Yes	NA	NA	Yes	NA	Yes	Yes	NA	NA	Yes	Yes	Yes	No
ASTEI08565	Category	RGA	RGA	RGA	RGA	RGA	RGA	RGA	RGA	RGA	RGA	RGA	GSR	RGA	RGA	RGA	RGA	RGA
	Transcript evidence	Yes	Yes	Yes	Yes	Yes	NA	NA	Yes	NA	Yes	Yes	NA	NA	Yes	Yes	Yes	Yes
ASTEI08543	Category	RGA	RGA	RGA	RGA	RGA	RGA	RGA	RGA	RGA	RGA	RGA	RGA	RGA	RGA	RGA	RGA	RGA
	Transcript evidence	Yes	Yes	Yes	Yes	Yes	NA	NA	Yes	NA	Yes	Yes	NA	NA	Yes	Yes	Yes	Yes
ASTEI08029	Category	RGA	RGA	ANT	ANT	GGR	ANT	RGA	GGR	ANT	GGR	RGA	GGR	ANT	ANT	RGA	ANT	ANT
	Transcript evidence	Yes	Yes	Yes	Yes	No	NA	NA	No	NA	No	Yes	NA	NA	Yes	Yes	Yes	Yes
ASTEI08169	Category	RGA	RGA	RGA	RGA	RGA	RGA	RGA	RGA	RGA	RGA	RGA	GSR	RGA	RGA	RGA	MGA	RGA
	Transcript evidence	Yes	No	Yes	Yes	Yes	NA	NA	Yes	NA	Yes	Yes	NA	NA	Yes	Yes	Yes	Yes
ASTEI07497	Category	RGA	RGA	RGA	RGA	RGA	RGA	RGA	RGA	RGA	RGA	RGA	RGA	RGA	RGA	RGA	RGA	RGA
	Transcript evidence	Yes	Yes	Yes	Yes	Yes	NA	NA	Yes	NA	Yes	Yes	NA	NA	Yes	Yes	Yes	Yes
ASTEI03467	Category	RGA	RGA	ANT	RGA	RGA	RGA	RGA	RGA	RGA	RGA	RGA	GSR	RGA	RGA	RGA	RGA	RGA
	Transcript evidence	Yes	Yes	Yes	Yes	Yes	NA	NA	Yes	NA	Yes	Yes	NA	NA	Yes	Yes	Yes	Yes
ASTEI03532	Category	RGA	RGA	RGA	RGA	RGA	RGA	RGA	RGA	RGA	RGA	RGA	GSR	GSR	RGA	RGA	RGA	ANT
	Transcript evidence	Yes	Yes	Yes	Yes	Yes	NA	NA	Yes	NA	Yes	Yes	NA	NA	Yes	Yes	Yes	Yes
ASTEI09857	category	RGA	ANT	ANT	RGA	RGA	ANT	RGA	ANT	ANT	ANT	ANT	MGA	MGA	MGA	ANT	RGA	RGA
	Transcript evidence	Yes	Yes	Yes	Yes	Yes	NA	NA	Yes	NA	Yes	Yes	NA	NA	No	Yes	Yes	Yes
ASTEI09956	category	RGA	ANT	ANT	ANT	ANT	ANT	ANT	ANT	ANT	ANT	ANT	ANT	ANT	ANT	ANT	ANT	ANT
	Transcript evidence	Yes	Yes	Yes	Yes	Yes	NA	NA	Yes	NA	Yes	Yes	NA	NA	Yes	Yes	Yes	Yes
ASTEI09926	category	RGA	RGA	ANT	RGA	ANT	MGA	ANT	ANT	ANT	ANT	ANT	GGR	ANT	ANT	ANT	ANT	ANT
	Transcript evidence	Yes	Yes	Yes	Yes	Yes	NA	NA	Yes	NA	Yes	Yes	NA	NA	Yes	Yes	Yes	Yes
ASTEI04520	category	RGA	RGA	ANT	RGA	ANT	RGA	RGA	ANT	RGA	RGA	RGA	RGA	ANT	RGA	ANT	RGA	MGA
	Transcript evidence	Yes	Yes	Yes	Yes	Yes	NA	NA	Yes	NA	Yes	Yes	NA	NA	Yes	Yes	Yes	No
ASTEI06882	category	RGA	RGA	RGA	RGA	RGA	RGA	RGA	RGA	RGA	RGA	RGA	RGA	RGA	RGA	RGA	RGA	RGA
	Transcript evidence	Yes	Yes	Yes	Yes	Yes	NA	NA	Yes	NA	Yes	Yes	NA	NA	Yes	Yes	Yes	Yes
ASTEI03411	category	RGA	RGA	RGA	RGA	RGA	RGA	RGA	RGA	RGA	RGA	RGA	GSR	RGA	RGA	RGA	RGA	RGA
	Transcript evidence	Yes	No	Yes	Yes	Yes	NA	NA	Yes	NA	Yes	Yes	NA	NA	No	No	Yes	Yes
ASTEI06552	category	RGA	ANT	MGA	RGA	RGA	ANT	ANT	RGA	ANT	MGA	RGA	RGA	ANT	ANT	RGA	ANT	MGA
	Transcript evidence	Yes	Yes	Yes	Yes	Yes	NA	NA	Yes	NA	Yes	Yes	NA	NA	Yes	Yes	Yes	Yes
ASTEI06476	category	RGA	RGA	ANT	RGA	ANT	RGA	RGA	ANT	RGA	ANT	RGA	RGA	RGA	ANT	ANT	ANT	ANT
	Transcript evidence	Yes	Yes	Yes	Yes	Yes	NA	NA	Yes	NA	Yes	Yes	NA	NA	Yes	Yes	Yes	Yes
ASTEI06523	category	RGA	RGA	RGA	RGA	RGA	RGA	RGA	RGA	RGA	RGA	RGA	RGA	MGA	RGA	RGA	RGA	RGA
	Transcript evidence	Yes	Yes	Yes	Yes	Yes	NA	NA	No	NA	Yes	Yes	NA	NA	Yes	Yes	Yes	Yes
ASTEI06592	category	RGA	RGA	GGR	GGR	GGR	MGA	RGA	GGR	GGR	GGR	RGA	RGA	MGA	RGA	RGA	GGR	GGR
	Transcript evidence	Yes	Yes	No	No	No	NA	NA	No	NA	No	Yes	NA	NA	Yes	Yes	No	No
ASTEI02305	category	RGA	ANT	RGA	RGA	RGA	RGA	RGA	ANT	MGA	ANT	RGA	MGA	RGA	ANT	ANT	ANT	RGA
	Transcript evidence	Yes	Yes	Yes	Yes	Yes	NA	NA	Yes	NA	Yes	Yes	NA	NA	Yes	Yes	Yes	Yes
ASTEI03664	category	RGA	RGA	RGA	ANT	ANT	ANT	ANT	ANT	ANT	ANT	RGA	ANT	RGA	RGA	RGA	RGA	RGA
	Transcript evidence	Yes	Yes	Yes	Yes	Yes	NA	NA	Yes	NA	Yes	Yes	NA	NA	Yes	Yes	Yes	Yes
ASTEI03254	category	RGA	ANT	ANT	RGA	RGA	RGA	RGA	RGA	RGA	RGA	RGA	RGA	RGA	RGA	ANT	RGA	ANT
	Transcript evidence	Yes	Yes	Yes	Yes	Yes	NA	NA	Yes	NA	Yes	Yes	NA	NA	Yes	Yes	Yes	Yes
ASTEI03244	category	RGA	RGA	ANT	RGA	ANT	ANT	RGA	ANT	ANT	ANT	ANT	RGA	RGA	RGA	ANT	ANT	RGA
	Transcript evidence	Yes	Yes	Yes	Yes	Yes	NA	NA	Yes	NA	Yes	Yes	NA	NA	Yes	Yes	Yes	Yes
ASTEI03813	category	RGA	RGA	MGA	GGR	GGR	GGR	GGR	GGR	GGR	MGA	RGA	GSR	GGR	GGR	GGR	GGR	GGR
	Transcript evidence	Yes	Yes	Yes	No	No	NA	NA	No	NA	Yes	Yes	NA	NA	No	No	No	No
ASTEI06954	category	RGA	ANT	RGA	RGA	RGA	RGA	RGA	ANT	ANT	ANT	RGA	GSR	MGA	MGA	RGA	ANT	ANT
	Transcript evidence	Yes	Yes	Yes	Yes	Yes	NA	NA	Yes	NA	Yes	Yes	NA	NA	Yes	Yes	No	Yes
ASTEI08768	Category	RGA	RGA	GGR	ANT	RGA	MGA	GGR	ANT	ANT	ANT	ANT	ANT	RGA	RGA	ANT	ANT	RGA
	Transcript evidence	Yes	Yes	No	Yes	Yes	NA	NA	Yes	NA	Yes	Yes	NA	NA	Yes	Yes	Yes	Yes
ASTEI08188	Category	RGA	ANT	ANT	ANT	ANT	ANT	ANT	ANT	ANT	ANT	ANT	ANT	ANT	ANT	ANT	ANT	ANT
	Transcript evidence	Yes	Yes	Yes	Yes	Yes	NA	NA	Yes	NA	Yes	Yes	NA	NA	Yes	Yes	Yes	Yes
ASTE002595	Category	RGA	RGA	RGA	ANT	GGR	GGR	ANT	RGA	ANT	GGR	RGA	ANT	ANT	ANT	RGA	ANT	GGR
	Transcript evidence	Yes	Yes	Yes	Yes	No	NA	NA	Yes	NA	No	Yes	NA	NA	Yes	Yes	Yes	No
ASTEI09627	category	RGA	RGA	RGA	RGA	ANT	RGA	RGA	ANT	RGA	ANT	RGA	RGA	RGA	RGA	RGA	RGA	ANT
	Transcript evidence	Yes	Yes	Yes	Yes	Yes	NA	NA	Yes	NA	Yes	Yes	NA	NA	Yes	Yes	Yes	Yes
ASTEI10369	category	RGA	RGA	RGA	ANT	ANT	ANT	ANT	ANT	ANT	ANT	ANT	GGR	ANT	ANT	ANT	ANT	ANT
	Transcript evidence	Yes	Yes	Yes	Yes	Yes	NA	NA	Yes	NA	Yes	Yes	NA	NA	Yes	Yes	Yes	Yes
ASTEI06801	category	RGA	RGA	ANT	RGA	ANT	RGA	RGA	RGA	RGA	RGA	RGA	RGA	RGA	RGA	RGA	RGA	RGA
	Transcript evidence	Yes	Yes	Yes	Yes	Yes	NA	NA	Yes	NA	No	Yes	NA	NA	Yes	Yes	Yes	Yes
ASTEI03681	Category	RGA	RGA	RGA	RGA	RGA	RGA	MGA	RGA	RGA	RGA	RGA	GSR	MGA	RGA	RGA	RGA	RGA
	Transcript evidence	Yes	Yes	Yes	Yes	Yes	NA	NA	Yes	NA	Yes	Yes	NA	NA	Yes	Yes	Yes	Yes
ASTEI03564	Category	RGA	RGA	RGA	ANT	ANT	ANT	RGA	ANT	ANT	ANT	RGA	GSR	GSR	ANT	RGA	ANT	ANT
	Transcript evidence	Yes	Yes	Yes	Yes	Yes	NA	NA	Yes	NA	Yes	Yes	NA	NA	Yes	Yes	Yes	Yes
ASTEI03845	Category	RGA	RGA	RGA	RGA	RGA	RGA	RGA	RGA	RGA	RGA	RGA	MGA	RGA	RGA	RGA	RGA	RGA
	Transcript evidence	Yes	Yes	Yes	Yes	Yes	NA	NA	Yes	NA	Yes	Yes	NA	NA	Yes	Yes	Yes	Yes
ASTEI03797	Category	RGA	RGA	RGA	RGA	RGA	RGA	RGA	RGA	RGA	RGA	RGA	GSR	RGA	RGA	RGA	RGA	RGA
	Transcript evidence	Yes	Yes	Yes	Yes	Yes	NA	NA	Yes	NA	Yes	Yes	NA	NA	Yes	Yes	Yes	Yes
ASTEI08400	Category	RGA	RGA	ANT	RGA	RGA	GGR	RGA	RGA	MGA	RGA	RGA	RGA	MGA	MGA	RGA	RGA	GGR
	Transcript evidence	Yes	Yes	Yes	Yes	Yes	NA	NA	Yes	NA	Yes	Yes	NA	NA	Yes	Yes	Yes	No
ASTEI04494	Category	RGA	ANT	GGR	ANT	GGR	MGA	ANT	GGR	GGR	GGR	ANT	RGA	GGR	GGR	ANT	GGR	GGR
	Transcript evidence	Yes	Yes	No	Yes	No	NA	NA	No	NA	No	Yes	NA	NA	No	Yes	No	No
ASTEI04217	Category	RGA	RGA	RGA	ANT	ANT	ANT	RGA	RGA	RGA	ANT	RGA	RGA	ANT	ANT	RGA	RGA	ANT
	Transcript evidence	Yes	Yes	Yes	Yes	Yes	NA	NA	Yes	NA	Yes	Yes	NA	NA	Yes	Yes	Yes	Yes
ASTEI09511	category	RGA	ANT	ANT	RGA	ANT	RGA	RGA	RGA	RGA	ANT	RGA	RGA	RGA	ANT	RGA	RGA	ANT
	Transcript evidence	Yes	Yes	Yes	Yes	Yes	NA	NA	Yes	NA	Yes	No	NA	NA	Yes	Yes	Yes	Yes
ASTEI09555	category	RGA	RGA	RGA	RGA	ANT	MGA	RGA	RGA	RGA	ANT	RGA	MGA	RGA	RGA	RGA	RGA	RGA
	Transcript evidence	Yes	Yes	Yes	Yes	Yes	NA	NA	Yes	NA	Yes	No	NA	NA	Yes	Yes	Yes	Yes
ASTEI04643	category	RGA	RGA	ANT	RGA	RGA	RGA	RGA	RGA	RGA	ANT	RGA	MGA	RGA	RGA	RGA	RGA	RGA
	Transcript evidence	Yes	Yes	Yes	Yes	Yes	NA	NA	Yes	NA	Yes	No	NA	NA	Yes	Yes	Yes	Yes
ASTEI09852	Category	RGA	RGA	RGA	RGA	RGA	RGA	RGA	RGA	RGA	ANT	RGA	ANT	RGA	RGA	RGA	RGA	RGA
	Transcript evidence	Yes	Yes	Yes	Yes	Yes	NA	NA	Yes	NA	Yes	Yes	NA	NA	Yes	Yes	Yes	Yes
ASTEI10786	Category	RGA	RGA	RGA	RGA	RGA	RGA	RGA	RGA	RGA	RGA	RGA	RGA	RGA	RGA	RGA	RGA	ANT
	Transcript evidence	Yes	Yes	Yes	Yes	Yes	NA	NA	Yes	NA	Yes	Yes	NA	NA	Yes	Yes	Yes	Yes
ASTEI06689	category	RGA	RGA	RGA	RGA	RGA	RGA	RGA	RGA	RGA	RGA	RGA	GGR	GSR	RGA	RGA	RGA	RGA
	Transcript evidence	Yes	Yes	Yes	Yes	Yes	NA	NA	Yes	NA	Yes	Yes	NA	NA	Yes	Yes	No	Yes
ASTEI03210; ASTEI03211; ASTEI03212	category	RGA	ANT	ANT	RGA	RGA	ANT	RGA	RGA	RGA	RGA	ANT	GSR	RGA	ANT	ANT	RGA	RGA
	Transcript evidence	Yes	Yes	Yes	Yes	Yes	NA	NA	Yes	NA	Yes	No	NA	NA	Yes	Yes	Yes	Yes
ASTEI10981; ASTEI10980	category	RGA	ANT	GGR	RGA	RGA	RGA	RGA	RGA	RGA	RGA	RGA	GSR	RGA	RGA	GSR	RGA	GGR
	Transcript evidence	Yes	Yes	No	Yes	Yes	NA	NA	Yes	NA	Yes	No	NA	NA	Yes	No	Yes	No
ASTEI10002	category	RGA	RGA	RGA	RGA	RGA	RGA	RGA	RGA	RGA	RGA	RGA	GSR	RGA	RGA	RGA	RGA	RGA
	Transcript evidence	Yes	Yes	Yes	Yes	Yes	NA	NA	Yes	NA	Yes	Yes	NA	NA	Yes	Yes	Yes	Yes
ASTEI10156	category	RGA	RGA	RGA	MGA	RGA	MGA	MGA	RGA	RGA	RGA	MGA	RGA	RGA	MGA	RGA	MGA	GGR
	Transcript evidence	Yes	Yes	Yes	Yes	Yes	NA	NA	Yes	NA	Yes	Yes	NA	NA	Yes	Yes	Yes	No
ASTEI10819; ASTEI10821	category	RGA	ANT	RGA	RGA	RGA	GSR	RGA	RGA	RGA	ANT	RGA	GSR	RGA	RGA	ANT	RGA	RGA
	Transcript evidence	Yes	Yes	Yes	Yes	Yes	NA	NA	Yes	NA	Yes	No	NA	NA	Yes	Yes	Yes	Yes
ASTEI09482; ASTEI09483	category	RGA	ANT	GSR	RGA	GSR	RGA	RGA	RGA	RGA	RGA	RGA	RGA	GSR	RGA	RGA	RGA	GSR
	Transcript evidence	Yes	Yes	No	Yes	No	NA	NA	Yes	NA	Yes	No	NA	NA	Yes	Yes	Yes	No
ASTEI09365	Category	RGA	RGA	RGA	RGA	RGA	MGA	RGA	RGA	RGA	RGA	RGA	GGR	RGA	RGA	RGA	RGA	RGA
	Transcript evidence	Yes	Yes	Yes	Yes	Yes	NA	NA	Yes	NA	Yes	Yes	NA	NA	Yes	Yes	Yes	Yes
ASTEI09353	Category	RGA	ANT	RGA	RGA	MGA	GGR	MGA	RGA	RGA	RGA	ANT	MGA	MGA	MGA	RGA	RGA	ANT
	Transcript evidence	Yes	Yes	Yes	Yes	Yes	NA	NA	Yes	NA	Yes	Yes	NA	NA	Yes	Yes	Yes	Yes
ASTEI10980, ASTEI10981	category	RGA	ANT	GSR	RGA	RGA	RGA	RGA	RGA	RGA	RGA	RGA	GSR	RGA	RGA	GSR	RGA	RGA
	Transcript evidence	Yes	Yes	No	Yes	Yes	NA	NA	Yes	NA	Yes	No	NA	NA	Yes	No	Yes	Yes
ASTEI11421	Category	RGA	MGA	ANT	ANT	ANT	ANT	ANT	ANT	ANT	ANT	ANT	ANT	ANT	ANT	GGR	ANT	ANT
	Transcript evidence	Yes	Yes	Yes	Yes	Yes	NA	NA	Yes	NA	Yes	Yes	NA	NA	Yes	No	Yes	Yes
ASTEI06309; ASTEI06310	Category	RGA	RGA	ANT	RGA	RGA	RGA	RGA	RGA	RGA	RGA	RGA	RGA	ANT	RGA	RGA	RGA	RGA
	Transcript evidence	Yes	Yes	Yes	Yes	Yes	NA	NA	Yes	NA	Yes	Yes	NA	NA	Yes	Yes	Yes	Yes
ASTEI06795; ASTEI06796	Category	RGA	RGA	RGA	RGA	RGA	RGA	RGA	RGA	RGA	RGA	RGA	RGA	RGA	RGA	RGA	RGA	RGA
	Transcript evidence	Yes	Yes	Yes	Yes	Yes	NA	NA	Yes	NA	Yes	Yes	NA	NA	Yes	Yes	Yes	Yes
ASTEI01491; ASTEI01493	Category	RGA	RGA	RGA	RGA	RGA	RGA	RGA	RGA	RGA	RGA	RGA	GSR	RGA	RGA	RGA	RGA	RGA
	Transcript evidence	Yes	Yes	Yes	Yes	Yes	NA	NA	Yes	NA	Yes	Yes	NA	NA	Yes	Yes	Yes	Yes
ASTEI01643; ASTEI01644	Category	RGA	RGA	RGA	RGA	RGA	RGA	RGA	RGA	RGA	RGA	RGA	GSR	ANT	RGA	RGA	RGA	RGA
	Transcript evidence	Yes	Yes	Yes	Yes	Yes	NA	NA	Yes	NA	Yes	Yes	NA	NA	Yes	Yes	Yes	Yes
ASTEI01280; ASTEI01282	Category	RGA	RGA	RGA	RGA	RGA	RGA	RGA	RGA	RGA	RGA	RGA	GSR	RGA	RGA	RGA	RGA	RGA
	Transcript evidence	Yes	Yes	Yes	Yes	Yes	NA	NA	Yes	NA	Yes	Yes	NA	NA	Yes	Yes	Yes	Yes
ASTEI03223; ASTEI03224	Category	RGA	RGA	RGA	RGA	RGA	ANT	RGA	RGA	RGA	RGA	RGA	GSR	ANT	RGA	RGA	RGA	RGA
	Transcript evidence	Yes	Yes	Yes	Yes	Yes	NA	NA	Yes	NA	Yes	No	NA	NA	Yes	Yes	Yes	Yes
ASTEI03474; ASTEI03475	Category	RGA	RGA	ANT	RGA	RGA	RGA	RGA	RGA	RGA	RGA	RGA	RGA	RGA	RGA	RGA	RGA	RGA
	Transcript evidence	Yes	Yes	Yes	Yes	Yes	NA	NA	Yes	NA	Yes	Yes	NA	NA	Yes	Yes	Yes	Yes
ASTEI03791; ASTEI03792	Category	RGA	RGA	RGA	RGA	ANT	GSR	RGA	RGA	RGA	RGA	RGA	GSR	GSR	ANT	RGA	RGA	RGA
	Transcript evidence	Yes	Yes	Yes	Yes	Yes	NA	NA	Yes	NA	Yes	Yes	NA	NA	Yes	Yes	Yes	Yes
ASTEI03594; ASTEI03595	Category	RGA	RGA	ANT	RGA	RGA	RGA	RGA	RGA	RGA	RGA	RGA	GSR	RGA	RGA	RGA	RGA	RGA
	Transcript evidence	Yes	Yes	Yes	Yes	Yes	NA	NA	Yes	NA	Yes	Yes	NA	NA	Yes	Yes	Yes	Yes
ASTEI03558; ASTEI03559	Category	RGA	RGA	RGA	RGA	RGA	MGA	RGA	RGA	RGA	RGA	RGA	GSR	RGA	RGA	RGA	RGA	ANT
	Transcript evidence	Yes	Yes	Yes	Yes	Yes	NA	NA	Yes	NA	Yes	Yes	NA	NA	Yes	Yes	Yes	Yes
