# Supplementary material for: Integrating transcriptomic and proteomic data for accurate assembly and annotation of genomes
Source: HighWire-hosted journal article supplement (doi:10.1101/gr.201368.115), 2016-11-15
Supplement: Supplemental_Table_S7.xlsx [file Supplemental_Table_S7.xlsx]

## Sheet: Sheet1
Supplemental Table 7.1 - A summary on identification of peptide evidence against designated non-coding RNAs
Prasad et al., 2016. Integrating transcriptomic and proteomic data for accurate assembly and annotation of genomes
Trans ID	Gene ID	mRNA_size	ORF_size	Fickett_score	Hexamer_score	coding_prob	# exons	# Peptides	# PSMs	mRNA sequence	Peptides
ASTF_00020750	XLOC_011265	1256	150	0.4753	-0.0687679	0.00733656	2	6	497	CTCTAATACAATACTAGAATTTAACCATCCCATCAACGGTGCGATGGCGTTAAAGCTAACGATATTCCTAATAGCGGCTGTGAGCGCTGCCAGTCTTCAAGACTATCAACAGCAGCAACAGCAACAACAGCTTCAACAGCAACAACAGCAACAGCAGCAACAGAATCAGGCTGACCCGTGGGATTTAAAACGATATGCGGCTGATTCCCAGAACCAAAACGATGATCAAGTAGGCTACGATTTCTCCTACTCAGTGCACGATCCAGTGACTGGAGACCAAAAAAGCCAGGAAGAATCTCGTCGCAATGGACACGTCCGTGGGCAGTACTCCTGGGTGGATGCCGACGGTATTCGCCAGATTGTCAACTACCGTGCAGATGATCGCACCGGATTCAACGC…	TGFNAEQR;ADDRTGFNAEQR;RYAADSQNQNDDQVGYDFSYSVHDPVTGDQK;YAADSQNQNDDQVGYDFSYSVHDPVTGDQK;GQYSWVDADGIR;QAGQEVTSQSEVR;
ASTF_00014525	XLOC_007841	9224	714	1.3128	0.305105	0.000683387	2	30	462	ATTGGAGGCCGAGCGCTACGATGTACTGACCCGGTCCGAATCGCGTTGACGTTTGTCATTGCGCTTTGCTTCGACTTTGCACCGCCAGAGAACGCTACCGTACTTTTCATGCACAGGGAAAAAACTGGGTCTCTACGACACACATCATCTCTCGCACGGATTTTCGTTTCGTGGTGTCGTCGAGTAAATAATCTTTTCCGTCGCGGTCCGATCACATCACGGGAAAAAACACATCTGCCTGCGCATCGGTGCGGTGTAGAACGGGTAAAAACTGAAGCGGTAAAGCGGACGAGCCAGACCGAAAGGGACAACAGAGTACAGGCCATCAATACCTCGGGATCTATATGCTAAAATCCCAGACGATCGTAAAAGTGTATCGTAATCAACAAAAGCGAACTC…	NPTNTAALDDFER;RNPTNTAALDDFER;VMIVQHK;ILQAISFPFLVSLK;QVEHTLNEK;IEAPFIPR;VRFPSHFGSELKDLLR;EDFEEKWK;VDAAESVR;VRFPSHFGSELK;NLLQVDLTK;CKGPGDTSNFDDYEEETLR;VTDFGFAKR;LKQVEHTLNEKR;NLLQVDLTKR;RILQAISFPFLVSLK;EFLDQAKEDFEEK;KVDAAESVR;EFLDQAKEDFEEKWK;DLKPENLLIDSQGYLK;RIEAPFIPR;DNSNLYMVLEYVPGGEMFSHLR;EFLDQAK;LKQVEHTLNEK;VTDFGFAK;FPSHFGSELKDLLR;FPSHFGSELK;GPGDTSNFDDYEEETLR;IKTLGTGSFGR;TWTLCGTPEYLAPEIILSK;
ASTF_00021676	XLOC_011944	2539	360	1.1396	0.440554	0.169326	4	22	425	CTCATTTAGAGGGCACGAGCTCAGTAAGGGGCCGCGTATAACGTTTCCTCTTTGGCTCTCTCTCTCTCTGGCTATCTGGCTAGTCAGCATATTCGATATGTTTGGGGCCCGAGAGATTGAATCCGCCACTGACTGTCTCGCATTCCCCTTCCCTTCCCCAGGATCGCCATTCCAGTTCACCGTCGGCCCACTCAAGGATACCGGAGCGCATCTGGTCAAGGCTGGCGGCCCAGGTCTGGAGCACGGCGAACAGGGTGTGCCGGCCGAGTTTAACGTGTGGACCCGCGAAGCCGGTGGTGGCACTCTCGCCATCTCGGTCGAAGGCCCTAGCAAAGCGGACATCGACTTCAAAGATCGCAAGGATGGGTCCTGCGATGTATCGTACGTCGTCAGCGAACC…	LEVAQFPTGCVQADKPAQFMVR;HIPDSPFK;NGAKGELDAK;IKVGKDDVDPAAVHASGK;GDYILLVK;YNQMHIVGSPFK;VAMDCTEVEEGYKVR;ADIDFKDR;TGVILPIFK;ENGIHAIHVK;NQYTVNYLVR;ERGDYILLVK;DTGAHLVK;YTPLLPGHYYMTIKYNQMHIVGSPFK;VAMDCTEVEEGYK;DGSCDVSYVVSEPGDYR;DDVDPAAVHASGK;KDGSCDVSYVVSEPGDYR;WGDDHIPGSPFK;EAGGGTLAISVEGPSK;FNGVHIPGSPYR;TDLIIDTCNAGAGTLAVTVDGPAK;
ASTF_00018622	XLOC_010055	339	99	0.8945	-0.753725	0.0111112	2	5	151	AACGATGTGTACAGCTACACCAGCATCAGCCACAAGAAGGACGACAAGAAGCTTATGTACACGCTAAGGAAAAGTCGACCACTGGTAAGGCTCTATCTGAGCACTGCTTACCGAGGCTGGTGACCGGTTAGGAAGCGACGAGATCGGATCGCTTGAGCACACACACTCACACACGATTTCACATATGCCTAGTCCGTGTCGGTGGAACTGCACACCCAGAGTAATGGAAAAAAGAAAGAACAACAGCCCAATTGCCCACTGTACTTGCACAACACATTTTATACCCGTTGTATCGGCCCGTTTTGACACCCGTTGAACAGCTCTTCAAAAACGAACTTC	DINDVYSYTSISHKK;KLMYTLSNQIK;KLMYTLR;LMYTLRK;DINDVYSYTSISHK;
ASTF_00018020	XLOC_009702	1316	327	0.9153	0.077049	0.146484	4	10	84	CGCATATTGATTCATCCCATTTTTTTATTTGTTTACATTCACGTCAGTAATCGCAGGTTGACAACAAAGATCGCCAACGAACGATCTACATTACTTCGGATCATTCCTTCTGCTTCTGTATCTACATTCCTCCAAAATGATGCGTTTTACCCGTTTTCTGCCAACATTTGCACGAAACCGGCTTTACACAACTAATATCTCTCAACCAGTGTCAGTGCGAATCGTGGAGGTAGGCCCCCGAGATGGGCTGCAAAACGAACCAACGCTTCTGCCGGCAGCGGTCAAGATCGAGCTCATAAATCAGCTGTCCGAAACCGGGCTACGTACTATCGAAGCGACCAGCTTTGTGAGCGCAAAATGGGTACCGCAGATGGGTGATAACGCGGAGGTGCTTAAAGG…	GINKLPGISYPVLTPNLK;WVPQMGDNAEVLK;GYVSTVVGCPYEGK;NVNCSVDESIAR;IELINQLSETGLR;KNVNCSVDESIAR;FQDVMDAAK;LPGISYPVLTPNLK;GASGNAATEDVVYMLHGLGIETGIDLPK;TIEATSFVSAK;
ASTF_00021228	XLOC_011582	2190	294	0.7129	-0.211766	0.0107381	2	5	82	TAGGACATCGCCGCCTACATAAAGAAAGAATTCGACAAAAAATACAACCCCACCTGGCACTGCATCGTGGGTCGAAACTTTGGCTCGTACGTGACGCACGAAACACGCCACTTCATCTACTTCTATCTCGGTCAGGTTGCCATCCTATTATTTAAGAGCGGTTAAACCACAAAATTAGCTTAATATCATCAGAATGCGGAACGGCGGCGGGAGAGGAGAGGTGAGCGTAAAAGGAGAGAGATGCATGCATGCAAATACACACTACCACACGAGGAAACACGGCACCGTGAAGATGCGTTAGATAAATGGCAACGATATGTGGCGGCCGCCCGCATCCAGGATCCAGGACCATCAGCCCTTAGCCGCTCATGAACTGTGTGGGCCACTCGGAATGGCAGT…	DIAAYIK;NFGSYVTHETRHFIYFYLGQVAILLFK;DIAAYIKK;KYNPTWHCIVGR;NFGSYVTHETR;
ASTF_00021475	XLOC_011778	651	9	0.3586	-2.36383	1.48123e-05	3	8	46	TTTTGTACAAACTTACATCTACTTACATCCTGATCAAACCCTCCCAAACCACACACACACACACCGAACACTTTTTCTTCCAATTTTCACTCCCGTACTTACGTACGTATGAAATAAAAATCAACCACGATCGCGGTGCGTCTGCTCGAGTTCGCGCATCTTCCCATATAAGAGCCACCCGCTGAATGTGATCTCCCCCAGAAACCCCGAACTTGTTCTAACAGCTAATCAAATAGGAAAATTAAATCCAGTTCGCCCGACGCGCAAGTTCAACAACCCGAAGCTGTACGACGATCCGACCGATTCGAAGCTGAAGGACAAGCAGGAGAAGATCGAGCGCGTTGCCGAGCTGAACAAGGTTCGCTACGAACCGGTCAACCTGGAGAAGGAGCGCCTGAA…	LAAEEAER;IEEERLAEEAR;VRYEPVNLEK;YEPVNLEKER;LYDDPTDSK;LYDDPTDSKLK;YEPVNLEK;KKEEAAAER;
ASTF_00017669	XLOC_009518	266	177	0.943	0.283559	0.249818	3	1	43	TGCGTTCGTTCATTTCCGACAAGCTGACGGTCTCTTTTCCGTCATTGGTCTCGAAGTAGACACACTTGATCGAAATGGCGTCCCACAAAACGTTCCGCATCAAGCAAAAGCTTGCCAAGAAGCTGAAGCAAAACAGACCCATTCCGCAATGGATTCGTATGCGCACGGGTAACACCATCCGGTACAACGCCAAGCGCCGTCACTGGAGACGTACCAAGCTGAAGCTGTAAGCGGCTCGTACTCCGTATTGTTTACCATCGAGTGCT	QNRPIPQWIR;
ASTF_00001801	XLOC_000942	5444	528	1.2109	0.280208	0.0148753	2	14	41	TGATGTGTTTTCTCAACAGTGCAACTTTCACCGATACGTTCTTTCGCTTCTAACCCGTCACTGGCCATCTGGATAGTATATGCGCACCTCACTCGCACGAACGCCGGAGCTGGAAGCTCGCACCTTCCTAGGTGCATCGGACAAAGGGCGTTCCACCGTCCATGGCGACCTGTACCACCAGCGTTTGGCAATGGTGATGGTGTTGCGGGCGTACAGAACGCACCGGGAGGAGCACGGATTTTCTTTCTTCGTCGCAGTGGAGGTGGCGAAAGCGGGCAAATTCGACGATATCATGTACTTCTACGAATCACCGCGCCAGCAAACCAACGGCACGTGCTTTATACAAGCGAAACACAAGCAGGGCAACGGATTTCGGATCACGCACGAGGCACTGTGCAC…	ENVQISCGCFHDVK;AGKFDDIMYFYESPR;TAVQCEQQEK;AYAGWVQEQYR;AGTTESGVPTAAAR;SQTIWSDSLR;CGPLDNSSPITKK;QQTNGTCFIQAK;ALHEEPTPPVIQPGQGGK;GDRLEQFSGHHLTADAWSR;LNDSLYLCVR;FDAQVDHDVNGVNYAK;FREAFWEAYQTQAK;EAFWEAYQTQAK;
ASTF_00001802	XLOC_000942	5633	528	1.2109	0.280208	0.0115641	2	14	41	CTTATCGTAAAAAGAAAATATATTGCATAAAAACTGTTCGAACTGCAATCACACCGACCCGCAGTGCTTTCGAACCCGTTGAGAAGGTTCGACGTACAGGTGTGTTGAGAAGTTCCGCTGAACACCGTAACGTGTTATCTTGTCGAGTGTAATCCACTGTACACCGTGCGACAGCAAACGTTTGACGAGCAGCTAGCTCGTACAAGTGTGGGTCCAACTATTGCGAAGCATTTCGGTTCCCATTGTCGAACGTAGGAAGAGCATCAACATGCGCACCTCACTCGCACGAACGCCGGAGCTGGAAGCTCGCACCTTCCTAGGTGCATCGGACAAAGGGCGTTCCACCGTCCATGGCGACCTGTACCACCAGCGTTTGGCAATGGTGATGGTGTTGCGGGC…	ENVQISCGCFHDVK;AGKFDDIMYFYESPR;TAVQCEQQEK;AYAGWVQEQYR;AGTTESGVPTAAAR;SQTIWSDSLR;CGPLDNSSPITKK;QQTNGTCFIQAK;ALHEEPTPPVIQPGQGGK;GDRLEQFSGHHLTADAWSR;LNDSLYLCVR;FDAQVDHDVNGVNYAK;FREAFWEAYQTQAK;EAFWEAYQTQAK;
ASTF_00001033	XLOC_000535	4124	639	1.0189	0.109624	0.0826026	3	18	38	CTGCTGCTGGTCGCCGTGCTACAGTGCTCGGATTTACGGTGTTTTCTGTGGTTTTCAGCCGATTTATGAACGAAGCGGCTGGAAATTATCGTCCTCGACGTGAGCCCCAACGTTTGACCTAAAGCGGAGGTAAAGGCGACGCAAAATGTCGGCTTTTTTGCAATGTATCGAGGTGGAAAACTTCAAGTCCTACCGGGGACGCACAACGATTGGACCGTTGAAGCGCTTTTCTGCTGTTATCGGACCGAATGGATCTGGAAAGTCCAATTTCATGGACGCCATCAGCTTCGTCATGGGAGAGAAAACGAGCAGCCTCCGTGTACGGAAGCTGACGGAACTCATAAACGGTGCCTCGATCGGGCGTCCCATTTCGAACCGTGCGTCAGTGATGGCGAGGTT…	IHELQSELDNVR;QQELNIIEK;TALFEEISGSGLLK;FIITNETEGEVEK;YNVAVTK;AVQDDEDSLETYK;AAFENEVAGESK;LEVPGVYDR;YLIHLDSVNR;IQSTNEEFEVAR;AVQDDEDSLETYKQTEAR;AEFEQQIDR;DLVQEYDRLK;SGIISGGSHDLAR;SVINASSEYR;INNNLEFER;ELVLQQER;IKAELSQDVGTSK;
ASTF_00014087	XLOC_007600	4483	717	1.1184	0.546522	0.295138	4	2	38	TCGGTGCGGGATAGATATTCAAATAGTGCAGTGTCGCAGCCATATATAGCTAAACAGCCGTTGCTTAAGACCTCTAGTCTTCTAGTTGAGAAGGAGCCCCTTTAGTGAAAGCTTAGGATCGGCACAAGAACACAGAGACACTTTGGATTTGGAAGTGTCATCGCGGAACTATTTAAAGAAAAAAAAAGTGCCCAATCAAAAAGTGGTCCCGTGTTTCCATCGAACGTTGGTTCAGTTTTCTTTGTGTTTGCAAAGAAAACTGTGAAAATCTCAGCAAAATTTTACCAGCAATTATAGTGATCGTTTTAGTTGTTTGTCTACTGATCTTATACTTCAAGATGGGTGGTGTTAAGCCCACTGAGGACACTGTCGCCGCTACTGCTGCCGTAGCTCAAGAAG…	VEPAVAAAPEVSTTTAAVAAPAVEAVAAAAPTPAADVTTTTAPAVDTTK;EAAAPAVVEEPTVPK;
ASTF_00013508	XLOC_007286	326	84	1.1486	0.603305	0.34725	2	4	37	CGTGCAGGAGCTACCATGTTAGAGTTCGTCATCATGGCTGTGTAGTATAGCAAATTAAAGATTGATAAATCCCGTGCATCTTTTCCCCTACTACTTGCAGGTTGCCGGCAAGCGTGATCGCGATCAGGAGCGTGAAGCGCAGCACTGGATCGAGACGGTGATTGGCGAAAAGTTTCCCGCCGGTTACGTCTACGAAGACTGTCTGCGGGACGGTATTCTGCTCTGCCGGCTCATGAATCGCCTGTCGCCCGGCATTGTGCCAAAGATCAACACCACCGGCGGCGATTACAAGATGATGGACAATATTAATCAATAAAATCGATCGC	INTTGGDYK;DGILLCR;EAQHWIETVIGEK;LSPGIVPK;
ASTF_00022370	XLOC_012573	602	222	1.0965	0.0618957	0.227752	1	4	37	GCGTCATCCCTTAGCGAGCCCTTTGTGGTGCGTAAAGCGTGTGTCGGCTAACTTATACCGGTTTGGTTTTGTTTGTTGCGATTTCAGAAACGCCGAAAAACAGTTCGTGGCCGAGACGGACGAGATTGAACCGGGCACGGAATGGGAACGGATCGCCAAGCTGTGCGATTTCAACCCGAAGACGAACAAATCCAGCAAGGACATCTCACGCATGCGTTCCATCATTTTGCAGCTGAAGCAAAACCCGCTCCAGGCCACCAAGAAGGTTTAAGCGTTTCCGGCGCAAGGATTCGTCCGCATACATATTACAATAATGCAATTATTGCGATAATATAACTATAAATTAAAAGGCAAAAAAGCGACACCGATACCGGGTAAGGCAAACAGTACACACAACCA…	QNPLQATK;SIILQLKQNPLQATK;LCDFNPK;QFVAETDEIEPGTEWER;
ASTF_00021852	XLOC_012097	255	126	1.2695	-0.146935	0.170999	1	4	35	CTTTTCCTGTACTCGAAGGAAAAACCACAGAAAGGTTCGAACGCCACCCTACCCCAACCGCTCGTCGCCTTCAAGGGTTCACGTTCGATCTTCCTAACGCAACGGTCCAGCCAGGACGAGCTGTTGAATGCACCGAGCGTTAGCATACTGGAGCTGCGCAACGAAGATGTCGAGCTGCCGGACAGTGACGAAAGCTTGTACTGGTGCAAAATCTTCAAGCTGGACGACTTCGCCCAAAAGCATCATCTCGTGCGG	GSNATLPQPLVAFK;IFKLDDFAQK;SIFLTQR;NEDVELPDSDESLYWCK;
ASTF_00020677	XLOC_011223	548	135	1.0028	-0.0959125	0.0710121	3	6	34	ACATCAACACTCTTTTGGCCACACATCCCTATCCGCAATTCTCGTTTTTTCTACTAAAGTTCGTGCAACTTAAGCATTAGCGGAGATTTGTTCATACCGCGTTTTAATTTAATTTCAATCTTTTGGTTTGTACACAAATAGAAAAGGTTTTCATGTAATGCACGTCTGTTCTTAGGCTTGGTTCTCGTTATTTTTGCCTCGTGTTGCCCCAAAACTAACTTATGCTGGTAAAATTCAATAGAATAGCTTCTTTATACAAGGATCGATCATCTTCAAACTCATTGGCGTTGTTTCGTGCTATATCATCAACAAAAGTAATTGATTGTCAGTCTACATTCGTAGCCTTTCCATAACTGATCTCTAATTGTATTTTTTTTATTAAAGGAATATTTATAGCTT…	GKYVLPHVAR;LCLIATFLEDGIR;MWVQWNEQR;YVLPHVAR;TEEVADQVIRK;TEEVADQVIR;
ASTF_00015594	XLOC_008415	170	150	0.7815	-0.189559	0.0566924	2	1	33	TGCGGCCGAGGAGAAACGCAAAGTGCGCCAGGCGGTGCAGCAAAACCTGTTCGCTTTCGTGACGCTATGCGTAGCCATACGAATAGCATCAGTCTTAATGGAGGCGTAGAACGAGGTTTCTTCAAGCACGAAACAAAGCCGCACAGTTGCATTTAGCTACCAAATAAAGA	MQGLPPTDAAEEK;
ASTF_00021703	XLOC_011969	1606	180	0.5437	-0.171114	0.00575154	4	4	31	GATTTTGTTCTTAATAATTTAAAATTTGCTGTATGCGGAACTGGGCAACGAATAACTGAGCTTTTCTGTAGCTGCTGCTGCTACTGATGTGCGTGCCTGCCTGCCTGCCTGCCTGCCGTGTCCGCATGGAAGTTGGGTATTCTGTTTTGGGCTAACAGTGGATTGCTGTACTGTTGTTTTGTGAGAGTGAAGTGCCATTTACTAATCCACGAACTATTTCTACAACTTTTGCGTTTATCGCCTTGCTTATTCCCTTCCCGGAGCTAGCTCATCCCTATCTTCAGCCCTATCAGGCGGTATTCAATCTCCTTCCGATCATGCTTTATTTACTCCTCTCTCTCTCTTTTTGATCACTTATTAATTGTAATTTCGTTTTCTTCTTTTTTTACTTTCCCTTCT…	ALYDYEGAESDELTFK;VGLYPANYVEVVAT;QGDLFEKLEDEDEQGWCK;NSTALSITNSTGNNR;
ASTF_00022303	XLOC_012508	743	213	0.9804	0.18791	0.176562	2	4	26	TGCGTAGCTATCTTTGGCAAACCGCTTCCATCTGTACTCACTCATCCCTCAAACGCGTCTCTTATCTGGACGGTCGTTTTTTCGTTGGCTGTCCTCCTCCGAGTGTGTGTGTGTGCCTCATTGATTGACGGCAGAAAACGACACGATCCGTATTCTAATTGATCAATTGTGCGCGCCAATCGGTACGAAGCGAAGTACGAAATCTGTGGGTCAGTTCCTCGCGGCTGCTGCCAGTCACGATAAGAGAAGCGATAACGTGCACTACGACCGTCCCTGCTGAGAACCGTATTTGGTCAGACGAAACTGTGCGATCCGGGAGTTACGCACCTTTTTTTCTGCAAAGCAAGCAGGGCACATTCACCATGGATACTCCAAGGGCTGCTGTGAAGTTGAGCGATA…	GDAYLSELYR;NEANFYNVVLK;KPANPFKDIDR;FTEETLDEIVR;
ASTF_00022867	XLOC_013060	757	111	1.3418	0.469979	0.329116	1	4	25	GCCCGTAAGGCGGCCGAAGAGGAAGCTGCCCGCAAGGCCGCCGAAGAGGAAGCCGCCCGCAAGGTTGCTGAGGAAGAAGCGCGCAAGGCGGCCGAGGAGGAGCAGAGCCGCATCACCGAGGCCCAGAAGGTGCGTGAGGATGAGCTGGCGCGGTTGAACGAGCTCGAGAAGCAGGCGATCGAGGAAAACAACGAGGAGCTGCTGAAGGAGATTGCCGAGCTGAAGGCGATCGCACAGTCGGACGAAGAGCTGCTGAAGCGTCAGGCGGCCAAGCTAGAGGAGACGGGCGCGCCGGTCGAAGGTGAGGCTGCCCCAGCGGAGGAAGCGGCTCCGGCCGCTGAAGCTGCCCCCGCCGAAGCAGCCCCGGCCGAAGAGACCCCCGCTGTCGCCGACGCTGCC…	VREDELAR;KAAEEEQSR;AIAQSDEELLK;KAAEEEAAR;
ASTF_00007331	XLOC_003969	1295	237	1.3172	0.418163	0.372721	7	6	22	GGAAAACAAATGCCGTTGATGAACCGTGGCTAGCGTTGTGCGTTCACGTCAAACGAATTGAAGTGTTTACATCGTGTGCGTCTGTGTGTGTGTGCCGGTCTATTGACGATTGGTCATCAGTGCAAACTTGATTGTTTACAACAAACGAGCAACATGAAGCTGGTGAATCTTTTCCATGCACCGGCGCTGTTGCTATGCCTTTTGGTGCTTAATTTCAGCGTTCAGTGCACCCTGGCTTGGTTCAGCATTCCAAGCTTTGATGCTGTACTCGACGGTGTGTCGGGAGCGATTAAAACGAGCTACAAGTTTGTAAACGATAATGGATACTGTGCGCTGAGAGAATGCTGCAATGAGGTTCACATCCATTCCGACATTACTGAACTGCGAAAGTCTTTAGAG…	NFIAEHITR;LNLVNDIKK;SLFIFDEVEK;SLFGQHIAAEVIVNAVGGHFK;SELIESHVVDHFVPFLPLELR;IHFPLQSEVETYK;
ASTF_00007330	XLOC_003969	2012	306	1.2222	0.339384	0.206038	8	6	22	CGAATAGAGTTTAAGTAATTATGTCTAATTATAGCGCTTCAAGCTTCGAAATGTGTACCCGACTGGTATGAATGCTAGCTCGATCTAGCAATCCCGTCGGTTAGGGCGGAATTGGAATAACAGCGGCGCGCACAGTACGATGGTTAGCGATGGTAAACTACACGCGTACAGTGTTCCTGCGATACGTCGGAATCTGTGTGTTTGCGTCGTGCTGTATTCTGCTGCTGATAAGCGGTCTGCCAGGTGCACTGGACACGTGCAAATGTGAGGAACGGCAGGATCGCGATCTACAGCACGAACAGTTCCACAAAAGCTTTCGGTTCGATGAGCAAACAGAGCGTCAAAAGCGGCTCGCCATCATTGTACCGTTCCGGGACCGATTCGACGAGCTGCTACAGT…	NFIAEHITR;LNLVNDIKK;SLFIFDEVEK;SLFGQHIAAEVIVNAVGGHFK;SELIESHVVDHFVPFLPLELR;IHFPLQSEVETYK;
ASTF_00000510	XLOC_000264	727	195	0.9005	0.191576	0.129248	4	1	20	TTTTATCCGCGTTTGACAGCTGTAACGACGCATAGCGTCTCTGTGCGTGTGTTGGTGAGATAGGCATTCAAGATCGATTCCACGTCAAGAAAGTGTTTACATTCTGTATTTTCTTTTGTCCCACAAAACGCCGGTGCTAGTAAAAATGGCGGTATCAACAACGGTGTCGCTGGTGCTGGCCTCACTGTCGGCTGTGCTGATTTTTTCGGGCATGCAAATGTATCGACCCCTGTTGGCCTCCTCCCAAATGGCTACCATCTTCGGTGGATACCTCGGATCGTGGCTTTTCATTCTTTCCCTCACCGCGGTATCAAACCTGGAGGCGGTTGTGCTGGGCTACGGATTTCAGGCCAAATTCTTTCCGGAAGTTTCGTTCTGCCTCGTCGTTGCGCTGTTCGC…	VHNVAAPVDSYAGK;
ASTF_00012990	XLOC_007003	2905	198	0.5229	-0.697653	0.000317159	6	2	19	GGTGCAGAGACTTGCGAGGAAAATACTTAGGAGAATACTTATATGTCGTGTGAATTTGTAAAATAAAAGTGACGAAGACATAACTATATGTTACTGCTGCTTTATCACAGAATGGCATGAAAATGTTCAGTTTGAAGCGAAACGAAATACATTGTGAAAGTTTATATTTGTCGCATAAAGTATTTAAGTGTACTTGTACTTATCACGCCTTCGGTGTCAAGTAAAAAAGCGAGTGAACAAAAATACTACCCGCAAATGGAGGTTTCATATGCTGCGGACAGCACGAAGAGACTATACGAAGCGTCATCTACCTGTAAAACTGTCCACAGCAGTAAAGTGACATGCTCTAAAGATTGTTCAATCGATTCAAACATTCAAGACAGTGAGGCAAACAATCGA…	DLDGSYLPTRPR;EHGVDTVDSPGVVHVVHSER;
ASTF_00023034	XLOC_013224	331	48	0.9335	0.135918	0.0626221	2	3	18	CGGTATAGCGGTCGGGTTTCTTGTGCCACCGATGCTGGTGGAAAACCATGACGATATCAGCCTTATCGGTGATGACCTACGGCTGATGTTTTACATTGTGGCCGGCGTCACGACCGTGCTCGTCGTGCTGGTGCTTTTCTTCTTTAAGGCATCGCCACCGACACCTCCGTCCGCTGCACAGGAAGCCACCAAAACGCCCAACCCGCTGCAATCGTCACCGTTCCTGCACTCGATCAAGCGGCTGATGCTTAACCGGAACTACGTGCTGCTTCTCATCTCGTACGGCATGAACGTGGGCGTGTTCTATGCCATCTCCACGCTGCTCAATCAG	ASPPTPPSAAQEATK;TPNPLQSSPFLHSIKR;TPNPLQSSPFLHSIK;
ASTF_00006982	XLOC_003780	1714	540	0.8072	-0.246297	0.181674	2	3	15	GGTCGATTCGTTCTTGCTTGCGCTTACCGCTCGTCGTTTCTCATTATCGTTTACAACGTCTTGTCTGGCGTGGGTATCTTCGTTGCTGTCGTCGTCGCGGTTTGCCGTGCTCTGTGTGCCAGGAGTTTCGATCCAACGCTGTACCGCCAAAAAATTGTGCATTATCAACGCGTTTTTCCATCAGCCACCCCATCAGCTAATAAGATTCCCCGTGCCAACACACATCAACCGAACTAAACATGACCGAAGAAAGCGTGGCCGTAAAGAAGGGACGTGGCCGCCCGAAAAAGAACCCCGCCGCCGGCGGCTCACCCGCTGCCACCACCAAACCTACGCCCGAGAAGAAGAAACCGGTGGAGTTGCCGCCGGCAGCCGACTCGGCCGAAGATAACGAGACCA…	NPAAGGSPAATTKPTPEKK;NPAAGGSPAATTKPTPEK;TSEATQNDKSEPAPK;
ASTF_00014839	XLOC_008014	365	54	0.9896	-0.292737	0.0280343	1	2	13	CTGTTTCAATTCCGTAAACAAACCCCCGCAAGCTAGAGAAGCCAATACATCGGACGGATCGGTTCGGACGGGATTCTATCGACCATCTGCACCAAAGAATTCCAATGGAGAGGGACAGTAAGACTTCGGCGGCAGATAATGGCCGAAAACCAGCCGGAAACAATCTACAATCGTTACCCACCAGACAGTATTTGGACCAGACGGTGATTCCCGTTCTGCTGCAGGGATTGAAAGTGCTCGCCAAAGAAAGACCCCAGGATCCCGTGCAATATCTAGCAAACTTTCTAATGGAAAACCGGAACCGCGTTGAAAAGAGCAATGGAGGCACCACAGAAGAAGCACAATAAATAGATTTTGTATAAGTG	KPAGNNLQSLPTR;ERPQDPVQYLANFLMENR;
ASTF_00015622	XLOC_008430	176	105	1.125	-0.0162917	0.144253	2	1	13	CCTGGTCGGTATTGCGGGATGCGTATTTTTCTTCGAGCGTGGCTTCGATATGATCACCGATGCCGTGTTCGAGTCCCATAACAAAGGGAAATTGTGGAAAGACATCAAGCACAAGTACGAGCAGTAACGAGTGAAGGCAGCATTGCAATGAAACAGCTTCTCGTTTATTGACCTAA	GFDMITDAVFESHNK;
ASTF_00015559	XLOC_008402	513	42	0.7645	-0.322526	0.00999683	3	6	12	CATATAATCCTGGCCATAATATGCATGACAATGTGACACTTGTCAAAGTGACATCGGATAAGTCAAATCACACACATACACATTTTCACTCACCTTCCGAAAATCCGTCGCTGCTTTCACGATACGCTTTGCGTAAATACTAAAAGTTACATAACTTCAACATGGCTGGTGGTGGTGATGAAAGCAAACTTACCGGACTGTCGCGTTACTTCAATGGCGAAACGATGCGGGGCCGTGCCAATGTTGCGAAGGCCACCTACGCGTCGATTGGGCTGCTGATTCTGTACTTCTCACTGAAGCCAAGCAAGAAGTGAGGAGCCCGCACCGTACCTGTCTACGCGTCGGTCATAGGATTACTTCGTGAAGTGTGCCAGTGGTGAAATACATTATGCAACAGTC…	ANVAKATYASIGLLILYFSLKPSK;AGGGDESKLTGLSR;ANVAKATYASIGLLILYFSLKPSKK;AGGGDESK;ATYASIGLLILYFSLKPSK;ATYASIGLLILYFSLKPSKK;
ASTF_00023384	XLOC_013572	502	285	0.71	0.235907	0.21879	1	3	12	CCTGCAGGTATGCAAACAACTGTCGGCCATTGCTCCAACGAAGGAAGACTATTACGAGGCGCATCTAACTGCCCTGCGTGATGTGATGGGAGTGATGCAGCATCATGACGCGATCACCGGTACTGAGAAGCAACATGTAGCGGACGACTATGCTCGCATGCTGTACGAAGGATTTGAGGCTTGCAGTGCCAATATCCGGTCGGTTCTGAACCAACTGTCTGGATATCGCGAGGACGGCAAGTTCGATTGGAGCTACTGTAAGCAGGCAACATCAGTGCTTGTGCAACGACCGAGAACGCGGACAATACGGTGGTATTGCTGTACAATCCTCTCGGATACGGCTCGAACGACTATGTACGACTACCGGTAAAGGATGGTCAGTATTCGGTACTAAACGAT…	DVMGVMQHHDAITGTEK;QHVADDYAR;LPVKDGQYSVLNDR;
ASTF_00018685	XLOC_010086	4673	333	0.5718	0.0438471	0.000644001	1	5	11	TCAACCGAACTCGCCACATGCATATGTACGCACGTTTCATTACAACCAGCCAGGATACTTGACAAGGATAGCAGACCCATTCCTGACCGAAACGATCGACTACCTTGGCACGGGGTATGGTGGACGTCCGATCGGTGATGGTACCGTGCAGGCAACCCATTTCAATGCAACCTGGCACGCACATAGCGATGCAAAACAGCTTAAGCTGAAACCTTCACACTTGGGAACGGGACGAAGAGCAAAGTTCTGCTACGACGCGCTGGTGACGGCAGGATATCTAGATCCGGCAGGACGTCCGTTGAAAAGTTTCTATCCCATGCTGGAGCTACGTTTACCCGTTGTATGCCGGCTCGGTACGTTCGGTCATCAGGTTGGGGCCATTTTAAATGGACGAGGATT…	TLVQPNSPHAYVR;FQVEHNEEGSVTR;FTGKEWDEETR;DLQGKPLIEYEAVYR;TYGADPDHHLDYR;
ASTF_00021443	XLOC_011752	1482	330	0.8339	0.0133791	0.086735	3	5	11	TGTAAACTTACTCGTTTCGGGATGTTTAAAAAAACGCGAGTGAAGTTGCTGTCAAGCTTTTTTTTAAAATATATTCCGCCGATAACGGCATCAAGCCCAAACTTACCCGAAACGCCGGACGAAATATCGCTAGAGCTAAGGAAGCAGGAAAGCCTGCTGGCGCAAATTCACGCCGAAATGAATGCCGGCTTCGTTACGAAGAAACGCGAAGAGCAGCTTTGGGAAGTGCAGCGCATCATTACACAACTGAAGCGAAAATTGCGATCATTCGAGAAAAAGTCCGATTGCGTACAGAAAAGCCTCGACGATACGGTGGACGGAGATGTTTCGATCGATTTGAACATACAAAAATCTAAACTGTCCTGTTCGGACGATGAATCGTCCATTAAAACCGTAACG…	KASIAESPDTATVK;KINLISVFR;TVTAISTESATNTEAK;NTPQETSDETAVPAER;LSCSDDESSIK;
ASTF_00014349	XLOC_007746	2251	432	0.9869	-0.146081	0.0823834	4	7	10	AGCGTTCCCAAACTAGCAGAAGAATTTTCCATTCAGCAGGACGTGACGCGTTGTGCAAAAGTTTGAAAGCCATTTCCTAATTCCTGTACGTATTCCAACATTAGTATCAAAGGTAATGGCGGACAGCAGTCAGGAAACTACAAACGACAACATGGAAATTGAATGTGGTTCGCCCGAAGAACAACCTTCGCAGAACGTGATTCAGAAGGTGATGGAACAGATACAACAAATGGTAGAGCAGAATAAGTTCACCGTGCTGCATCAAGTAATTCAGCAAAGCATCCAACACGTAAACCAGAAAAAGGAAATCATGAAGCTGCAGCATTCCATCAAGAAAGTGCTGGAGGAGCGGATGCAGACCAAAAGTGATCTATTCCTGCAGCACAATTTTCAGAAAAA…	IKNEITQNQAK;LADDLQSSK;DQSNAFDQLQAEK;AQLKEDDAMAR;EKLEAINALIK;LRDQSNAFDQLQAEK;LEAINALIK;
ASTF_00021662	XLOC_011931	380	150	1.1094	0.059393	0.178674	1	1	10	CAACAATCGTACGCCAGGCATCAACCGTTGTGCACCCGCAGTATCCAGCATTCAGCTCCCACAGAGGTACAGGAACTTGGTACAAATTACAAACAGCCAGCACAGTGAAAGTGTGTTAAAGATCGTTCGGAAAATCGGATCGCTTGATTTGTGTTTCGAGCTTGTGCGTTGAAGTGCGATCGATCTCGACCCCAGGTTTCGACACACGGTTCTTTAAGGAACGAAAGTGATCCCGTACCACGACAGCAACATGGTGAAGCTTCATCTCGTCTGTGCCGTACTGCTGTTCGCCTTTCTCGGCTGGGCTCACGGGCTGCCGGTGAAGGAGCAGGAGCTGGAGGAGGTGCTGACCAAGCTGCAGGAACTGAAGCGGCTGAACG	EQELEEVLTK;
ASTF_00021951	XLOC_012187	657	201	0.7813	-0.182591	0.0473203	3	2	10	TAGCTCAAAATAATAAAAATGTTTACGCATCTCCTACCAGGTCTGTCTGATGTTCCCGGTGAGGCAATGGTAAAGTCTTACTGTCCCAAATGCATCGACGTTTACACACCAAAGTCCTCTAGACATCATCATACCGATGGCGCATACTTCGGAACTGGATTCCCGCACATGCTGTTCATGGTACACCCAGAGTACCGTCCCAAACGTCCCGCAAATCAATTCATACCACGTCTCTACGGTTTTAAGATCCACTCCTTAGCGTATCAAATCCAACTGCAGGCAGCAGCGAACTTTAAGGCACCGCTACGAGGGAGCTCGGCGAAGGGCATCGATAACTGAACCGCAAGCCGCCGAGACTATATCGAGAAGATAGTTTGAGGCCACCCTGCCCCCCCCCGA…	CIDVYTPK;HHHTDGAYFGTGFPHMLFMVHPEYRPK;
ASTF_00017977	XLOC_009684	505	225	0.9676	0.036588	0.181098	3	1	10	AACAAACTGTTTCTCCCTTGGCAGGATGAGATACGGTCGATCACGCTTTCCGGAACTGCTGATTATTACGGTGTTCGGTATAGGTGGAGGATTTTACGTGTTCCAGCCAACGTTTCGGCAGCTGCAACAAGAACGCACCGGTACTGGCACTGCCACCGGTGAAACTCCCGCAACTACTTCCAAAGGAGCATAAAACGATCAGCATCCGTAAAAATGTCTATGTCAGCGGTGGCGCGTATGTTTCAAATGATTAAAGGATCACCGATAGCAGTGGTCGGAGGAACTATCCTAATTACGGGATCCTTAATCTACAGCTACCGATCCGTGTATCGACCGTTCGTGACGCGACGGGAACGAGCGGAAGCGGAAGCGATGGCAAACTACATTTTCCAGATGGAG…	TGTGTATGETPATTSK;
ASTF_00004265	XLOC_002241	983	195	0.733	0.018902	0.0405859	1	2	9	CATGTAAGGGTGAACACGGCGAGCAGGTCGGTTTTCTCACTACCACTCTGCTCCATTGTGCCGTGTGTTCTTCGCAACGTCCAAACAACATCCGATCGTATCGGATCGGCGCGTCAGTGCGTGATCGTGCAAAGTCTAACGTCAGTGAAGAATTTCGCGTGAAGAACGTATAACGTGTGAGTAAGTGCGCTTCTCATTTGTTTGCCCCTGTGCCTGCAAAACTCCTCCCGAGAATTTTAAGCCAGTCCAAAACCATACACCCCACACATGGGTTATCGGCGACGTCACAGAAGTCGCAGCCGGGATGGAAGCCCGGAGCGCACCAGCTCAAGGCCAACGGAGGCCGCTGCAGGCGAAGGTGATGAAGCATCCGGCCATCGGACGTCATCGTCACGTCAT…	SSYTSSNSTAVATR;TSSRPTEAAAGEGDEASGHR;
ASTF_00015526	XLOC_008387	3424	447	0.9163	0.285868	0.0452255	5	3	8	AGGATGCGCGCCATTTTTATGGGCACGATCTAGTGGCCGCTCTCGAACATCATGAGCATGATCAGGGTCAGGAGTATGAGTTCGCGTTGACAGCACTCGCAATATGCAGTTCGGCAACGCATGTACGAAAGCGCCAAATACGACGGCTGTTGGATATAGCCAGCGGCGAGGTGAATGATGTCGACACAATCGCCATGGTGCTGCTGGCACTACGGTGCATCGTTACCGATCATCGCCATCGTCATCTGCAGCATTTCGTCCGTCGTCCAGCGCGTGGTTTGGCTAGTTTGCAAGGACCGCAGGGTAGCTTTGGTTCGCTCCGAAGCACGGCACTGGCTATGCAAGCACTGCAAGATTTGGAGCCAGATCCGGCCGGAAAATGGAATCGCACCGCTGCGT…	LAAPIGLGISPVEELEPR;GLASLQGPQGSFGSLR;NPPGNQLIAPLGVDELLVEDGEHYLYWYK;
ASTF_00007932	XLOC_004309	779	192	1.1151	0.250141	0.227235	2	2	8	TGTCCGGTGCTATTGAAGCGGATTTGTGCGGAGTGTACAGAGCGTATCGGTTGAACGGTCGGAAACGATATCGGTGCAGTGAAGATGAAACAGTTCGTGGTGTTCGCTAGTGTGTGCTGTGTCCTGCTGGCAGGACGTGTCGTGTTGTCTGCTCCGGCACCGCAGCAGGGCGGTGGTGCTGGCGGTGCATCACCGAACGACGTCCAAACTGTGCGATATTACAGCGAAAACAATGGACTAGATGGTTACAAGTTCAATTACGAGCTGAGCGATGGACAGATCCGTTCGGAAGTCGGCACTTACCGGGACGTGAAGGATGCGGAAGGCAAGGACGTGAAGGCGCTGTTCGTGCAGGGCTCGTACTCGTTCGTTGGCCCCGATGGTCAGACGTACTGGGTG…	YYSENNGLDGYK;VGTGPTGGIQPGQEAPVTSA;
ASTF_00015057	XLOC_008124	2895	327	0.8137	-0.334049	0.00564567	2	2	8	CGTCAGTTTGTTTGCTAGCGTTAGTGACGCATCTTGGATGGTTCCGGTCCGGTCGCTTCCCGACGGTTTCCCTGGGCGAGATTTTCCACGCGTGTGTGTGGAAACATCGACGGTTTCGCGTGTGATACCGGTGCAGTGAAAAAAAAAACGGTGGCATTAAAAGTATTTTGCACCCACCCCTCCCCCTCCTTTTCGTTTGTTTGTTTCCTTTCACCGTGTCCAATGTGTCATTGAGTACTTGCTTGAGGGTCTGCGTGTGTGTGCGTGTTTTAATGTGGTGATAAAGAGTGTCTTTAATAGCGCCTAGCCGTGGTAGATGCATTCGCATGCATGCGGAATGAACTGTTCAGTCAGATCTCGTTTATCTTGCTCTCGGTGCGTCTCGCTAATGTGCTCTGG…	SFSAMQDASAK;VGNAQGRPPTGK;
ASTF_00022082	XLOC_012304	1208	96	0.8729	-0.660804	0.00393884	2	2	8	TCATCCCTGATCCAGGTGTACCGAAGGGGATGCATCCCACGGGGTGGTAACTGTGACCATCGGTCTAACGACTGCTGCCACAACAGCTCCTGCCGGTGCAATCTGTGGGGCTCCAACTGTCGCTGTCAACGCATGGGCCTGTTCCAGAAATGGGGATGAGCGCTGAACGAGTTGGATCACTAAGCTCCTTACCAACCCTTCCCGAGTACTTCTAAATTGTGTTTGTTTTTCAAATCCTTGAGTTCCTTTACTTTAAGCATCCTACACGAAACAAGAATCTGAAACACGGCACCCAGAACCATTGCAAATCGATTAACCGGACAAGAAGCGTCAAACTATCACGGAACGGAACAACGGAAAAAGAATATCTGATCACGAACACGGAACCGAAACTAATGA…	CNLWGSNCR;SSLIQVYR;
ASTF_00022153	XLOC_012369	257	186	0.7255	-0.05311	0.0790529	2	2	8	TTCCCGTTTGTGGTTTGCGTTCGCGAGGCATCCAAGTTTGAAGTCATTCTTCGCAGTGTATCGGAAAGAATTCATCACACCGCCGAACAGGAGCTGGCCATTGCTTTGGGTGAAGTGAAGAAAATTTGCCGCTTGCGTATTTTGCAGTTGGTTGATAATTTGTGACCATTTTTGTGAGCCTTTCATCGTTTTGGACGCTTCACATACGCTTGTAGCTCGAAAGATAGGCAGAGATTCCAGTCAGCATCTGAAAGTAA	ILQLVDNL;EASKFEVILR;
ASTF_00003645	XLOC_001881	1572	321	0.8735	0.294815	0.145474	1	3	7	GGAGGTGATACAGCGCAACTGTCGGAACTGCTCGCCCCAGCAGGCACAGAACGCCCAGAAGCTGACGAACTTCCTGCAGACCCGCTATCCGGAGGTGTGGGCGATGCTGATACGCAAGTATGGTGCCGTTTAAGGGCCCGGTCGCGTACAGCGGGACTCCATTCACCGATCGAGAGCGTCGAATGGAGCTGCCGTACCGTGGAGCGCACCATATTTCATCACCATCATCGTCGTCAGTATCACCGGCATTCACCGACAGCAGTTTCTTCATGTGACCGGAGGACAAAAAAAGAAAGAGAGGCACACACACGCACACACACATTCCAATAAAACCCGAATCTTACCGTTTTGTCGTCAAACATATCCTGGCAGCAAAGACTGGCAAAATGGCACGGCGCG…	AALPEVIQR;YPEVWAMLIR;LTNFLQTR;
ASTF_00022712	XLOC_012906	526	150	0.7466	-0.495655	0.0159629	1	3	7	AGCAAAGAAACAGCAGGATGAATCCAGCAGCGAGGAAGATTCTTCTGAAGATGAAGCACCGGCGAAGAAGCCAGCTGCTCCTAAGAATCCGGTAGCGGCAACCGCTAAACGGAAAGCAGAGTCGTCAGATGAATCAGACAGCTCGGACGAAGAACCACCAGCCGCAAAGAAAGCTGCGTTATTAAATTCCTCCACTCCGAAGGCTGCTGTAAAAGCAGCAAAGGAAGAATCGTCTTCGGACTCAGAATCGGAGGAAGAGGAGGATACAGGTTCCGCAAAGGCGAAACAATCAGCTAATCAGGTGGGCCAGAAAAGAAAGATGGAAGAACAGGAACAGAGCAATCCACCAGCAAAGAAAGTGAACAACTACAGCAACTTTGTACGGGCCAGTGATCAACA…	KMEEQEQSNPPAK;VNNYSNFVR;KAALLNSSTPK;
ASTF_00007749	XLOC_004205	715	201	0.9784	-0.201474	0.073375	2	2	7	ACTGCCGACTGTTGTTTTATCAAGCGCCCTGGCTAACAAGATTTGTGGCATCATGCGATTTGCTAATCCGGCTGGCGAAAGAAACAAAGATCCGATACTGAATGTGTTGAAGCGGGTTTTATCCAAAACCCTACCCAATCTTCGACTATTGGAAATTTCTTCCGGTGTGGGATTACATGCGCCTTACTTTGCCAAGGAATTCCCCAACATCACTTTTCAACCATCGGAATTCGATACCACTTTGTTTGGCAGTATCGAAGCCTATCGACAAGGGGTAGAGAACGTTCGTTCTCCAATCTTCATCGACGTTTCGAAGCCGTGCCAAGAATGGGAGAATGAGGCCAACATTAACCAACGCAACTGCGCGAACCATTTCGATTACATGCTCAACATCAATAT…	LLEISSGVGLHAPYFAK;GISLLEVIDLPANNK;
ASTF_00022772	XLOC_012966	650	219	0.9553	0.429742	0.29656	2	2	7	GATACAACCGCTCAGTTTCAGGCCGCTTGTAATGACGGGTGTCACAAGTTTGTTTGGGCGCAAATTACGGCTTTATTAAAAATTGCTCGGCGAAAAACAGTAAAGTTGTGTTATTAATAATATTCGTTCATTGGTTTCATCAAAGTACACTGCTAACTAGCTTGGGAACTACACGCCATACACGGCATAGCGGCACATTTCATCGATTGCATTTGCAGCGCCGTACCCGAAAGCGAACGCAGCAACCGGACCACACACACGCGACGCGCTTCTCTCAAGAACTACCGTAATTTGCGCTTAAAGCTATTCGCCAGCGCCCCTAAATAGTGGAATCTCTTGAGCCTCAGTTTCCGGATTTCCCGCGAGCAGAAGTATTTGTGGTGTAGTTTGTTCAGTACG…	GYSSEENTWEPEENLDCDDLIQAFK;VVNGKVEYFLK;
ASTF_00021918	XLOC_012158	1527	225	0.8539	-0.670568	0.00737092	2	1	7	TTCCCTTTTCTGTTTTCTGTTTTTTTTTCTCGTTATGTTTGATGAATGTTTGGTTTGAATAGCAGTGATTAATTCGTACCTTTATATTATTTGATTAAACCGTTTCGTTGAGTCGAACAACGTAAAGATTTTTAATGCTGTCCTAGTTTTTGCGATAAGTTGCATTATCCGGAATGGAATATTGACTTTTGTTAAACCAAACCAGCAGTTTCGCATTCGCTTTAATGAGCCAACTGAAGAGAAGAAAAAAATCCGTCGAGGGCGGCGATGGAGCAAATGAAGGTTACAAAGATGTGTTTGAAGCATACAAACCTAAAACCCAGCGGCCGTCGAACGCTAGCACCGACGAAACGCTCCGGCGGCAGGATTCACCGGGGCATCCCACTGTCCCGTCCACCC…	SESANIHNHNPPTHAR;
ASTF_00013936	XLOC_007522	629	234	0.815	-0.0667129	0.0913199	3	3	6	ACGTGCCGGACGGTTGCTGTTCGACGCACCCTCAAACCGTTGCTTAAATTGCGTGTCGAAAAAAAAAACCGTGTGACCTACACCTCGGGCGTTGTTTGTGTGCGAGTAAGAGTAAGTGCGAAGGTTGCTGGTCCTAGAAAACCGTGAGCCCATCCTCACCGTGCGGTTGTGTGGTTGTAAATCTTCCAATTTCAAAGTGCAAAAAAGTGCGAAGCGGGAAGGCTACGGTACGGTACCGACCGAATTGAATAACTGTTTCGTGCGCCCCCGGGAACCGAAAATTGTTTCGCGCAAAAAACAAAAAGCCAGCCACCACAAAAATGCATAAGTGTGTTGCATTATGCTTTACGATACTGGCCCTTGTGCTAGCAGTGCTTCTCCCAGCCGCACAAGCTACTC…	LLYGYGGPELYQYK;APNFQYFERPK;SFSPLDGIH;
ASTF_00013446	XLOC_007252	605	180	0.9507	-0.144235	0.0744352	5	1	6	ACCACGATAACTCGGTTTGCATCAGGGATCCATTTCATCCCCCCATTCGGCCTAGATGAATTTTCGTCACGATTGAACCGGTCAACGATTTGTTTACTCTAGTTGCAAATGCTCTTGTGACTTATTATATTGTCTAGTGCACTCGTTAACAGTTATCATGGCCAACAATTGTCGCCTGGGATCAAGACTTCGAGTTTCTGTGGCGATAATTGTTTTAATATGTGTGTGTTTAAAGCAAGTGAAAGGATCCTGTCTAAGCTACGGTCATTCATGTTGGGGAGCGCATGGCAAACGGGCAGGTCCGCCGGGACGTACGGCTTCTGTTGATGCACCATTCGCCGTACAGTTTCAACCGCAGCCGCTGCTCGACCAAACCAACCCACTCCCTGCTGCTTTATC…	IGSEPTNSVEGR;
ASTF_00001768	XLOC_000922	700	147	0.7197	0.00388168	0.036242	2	2	5	CAGCTGACCATACAACGAGTTTGTTTGTTGTTTTGATGTGTGGCTACAATTTCATTTTTGCGCAACAGCTAGCTCCCAGCGAATCTTCCCGCAGCGAACGAACGAACGATGGCGGATCATCGGCGACGTGTGTTGGATCTTTACAAACGGTTGCAGTACATGGGCCGCGAGTATCCGGGCGGACCGGACAAATTTCGGCAGCGCTGCTACAACGCGTTCAAGCGCCAAAGCACCGAAACCGATCCGGAGAAGATTGAGAAAGCGATCGGGCTGGGCGAGTACGTGGTGAAGGAAATTGAAGCCCTGTACAGCCTGCGAAAGTATCGGGCCATGAAGCGTAGATATTACGATGAGAAGTAGTGGAAGGGGGCGGGTGGTGGGGGTTAAAAGAAGTTACAG…	QSTETDPEKIEK;AIGLGEYVVK;
ASTF_00002178	XLOC_001163	3294	450	1.2925	0.178394	0.121608	12	2	5	CTAGTCGTGGAACAATTGATTGTGTTTTGGTGAAATTCTTGGTAGCGGCGTGGAATATACTCGTTCGTGGTGCGTTAGCTTTTTTGTTTTTTGTTCGTTGGTCTCTGAGTGCGTGCGTGTGTTTGCGAGGGACAGGAAATCGAATCGAACCCTTATTCTACGGAAACCTAGAAGACTTGTAGTGCAAAACTAAATCGCGTGCCCGATTGTTTCGAAATTTGTGCCTATATCACCTGACAATCTCGGCGATCATGGAATCCAACAAGGAAGTTGATATGGTAAAGCTCGAGAACGTGCTGGAACCTCGGCCGCAAGCGGTGGAAGAACAATCCCCACCAGCGGTCGAGAACGTTGGCGAATCGGTTCTGCCGGTACCCGGCGACGATCAACCAAACGATC…	QASEMPSDEPQSEVVPESVSK;DTAGATVSEAGGQESENASVEPQSEVVK;
ASTF_00002180	XLOC_001163	3294	450	1.2925	0.178394	0.121608	12	2	5	CTAGTCGTGGAACAATTGATTGTGTTTTGGTGAAATTCTTGGTAGCGGCGTGGAATATACTCGTTCGTGGTGCGTTAGCTTTTTTGTTTTTTGTTCGTTGGTCTCTGAGTGCGTGCGTGTGTTTGCGAGGGACAGGAAATCGAATCGAACCCTTATTCTACGGAAACCTAGAAGACTTGTAGTGCAAAACTAAATCGCGTGCCCGATTGTTTCGAAATTTGTGCCTATATCACCTGACAATCTCGGCGATCATGGAATCCAACAAGGAAGTTGATATGGTAAAGCTCGAGAACGTGCTGGAACCTCGGCCGCAAGCGGTGGAAGAACAATCCCCACCAGCGGTCGAGAACGTTGGCGAATCGGTTCTGCCGGTACCCGGCGACGATCAACCAAACGATC…	QASEMPSDEPQSEVVPESVSK;DTAGATVSEAGGQESENASVEPQSEVVK;
ASTF_00002179	XLOC_001163	3289	570	0.7226	-0.12337	0.0346231	12	2	5	CTAGTCGTGGAACAATTGATTGTGTTTTGGTGAAATTCTTGGTAGCGGCGTGGAATATACTCGTTCGTGGTGCGTTAGCTTTTTTGTTTTTTGTTCGTTGGTCTCTGAGTGCGTGCGTGTGTTTGCGAGGGACAGGAAATCGAATCGAACCCTTATTCTACGGAAACCTAGAAGACTTGTAGTGCAAAACTAAATCGCGTGCCCGATTGTTTCGAAATTTGTGCCTATATCACCTGACAATCTCGGCGATCATGGAATCCAACAAGGAAGTTGATATGGTAAAGCTCGAGAACGTGCTGGAACCTCGGCCGCAAGCGGTGGAAGAACAATCCCCACCAGCGGTCGAGAACGTTGGCGAATCGGTTCTGCCGGTACCCGGCGACGATCAACCAAACGATC…	QASEMPSDEPQSEVVPESVSK;DTAGATVSEAGGQESENASVEPQSEVVK;
ASTF_00016396	XLOC_008836	693	99	0.8331	-0.358786	0.0145555	6	1	5	GAAGGGTTGACAACGATTTAGGTAAATTCTTTCTGAACGTGCGCTCAAAGTGGAAGGTCAAACTTGTCGTAAATCAAAGAAAAGTTGTCCTTACAGCGATGAAGAAGTTGATATATGTTTGTGTAGTTCACATAAGTATTAATCCGGATTGACCAGTACGTTCTGAGTGTGTATAAATTTACTGAAATCATGCGTTGAAATTCCGATATTGGCGGCAATCGTCGTCTTGGTCGTGGCTGAGTCGCATGGTATGCCACCGCACATGTAGCTATCATGGATGAATGGAAACCGTTGGTCCTCATTTCACAATGTCCCGACTCGACATAACTTGAACCGTCCTCCTACAAAAGGTTGCGTTCCCTCATGGCTTGGGTAAAAAAGGTAGAAGATGACTGGATG…	QTSVDIPIDTNSLQR;
ASTF_00003877	XLOC_002023	3521	489	1.0235	0.0450412	0.0448317	2	4	4	CTTATTTCAACGGTTTGTAGCAACCACTGGTTGTTGTTCGCGTGTGTCCCGTGTCGTGTGGTGCCGATGCCTGAATAAGATGGCCAATAAACAGCCAACCGGTTCCAATCGGCAGTCGTGTGCGAAAATTCAAACCACCATTCACGAAGCGCTGGTGAAGATAAGCAATCAAGCAAGGAGGCGCGCACTTTTACCGCCAAGGCAAAGCAATCCAACGAACGTAACGCAAGCATCTACCGCGGTGAGTACGTCCACTGCTACCAGGAATCGCACCGAACAACCGTCTACATCGAAAGCGTCAGACGCGGTGAATAAATCCACCGCCCAACAGCGACCACCTAACGAACCGCCCACCGTAACCGGCAACGCACCCGGAACCCCGGAACTGTTGGATAATTC…	CITPINVTNNR;KYEVGDYSK;LLTPAEQEEQVSK;EEEITEKPPAATIPVDPSENVPQNHQR;
ASTF_00004251	XLOC_002234	1014	471	0.8266	0.0101208	0.376343	3	3	4	CCGGACGCATTGTTCCTGTGTGTCTTCATTTAGCTGATTCTACTCAAAGTGACCGGACGCAGGGACGCAGCGCAAGAAAGATCGTCAAGATGTTCAGTGCATGGCAAAATTGGTGGGATAAACAGCGCAATAAGTGTAACAAATTCGGATGGAATAGTTGCGTACAGCCCGAAAGGGCAGCATCGACCGAATTTGCTTTTACTCAGCACACAAACTGGGCCCAAGAACCGGCGCATCACGACAGTCTCCCGAGACGTGTGTTTGGTAATTTCCGATCGGAAAAGAACGAAAGCGAAGTGTTGGAACAAATGGCGTTGAAACGCTTGCTGAAAGAACATGGACTGTATAACAAGCATCAGACGATACAGCAACGCCGGCGACTGAAGTATCTTCTGGCAC…	RCDPVASPELR;CDPVASPELR;SEKNESEVLEQMALK;
ASTF_00021611	XLOC_011886	3338	258	0.7446	-0.216059	0.00182074	2	3	4	AAGCAGTCGATAATGGAAGTCTAGTCTACGGCAGCGACCTGCCGGTCGGAACTGGTGGCCTGATGGTGGTACAATCGAGGGACGATTCCAGCCCCAAGCAGCAGCAGCAGCAGCAGCAGTCAGCAGCCCAACAGCCACAATCACAGCAGCAGTCCCACCATCACAGCACGCCCCGGGACTCGCTCACCAGCAGTGGCGATCTACGTGCCATCCAAAGACCGCAACCGAAGAAGCCCCCGTCGAAAGGGGTCGGTGCGATACCGCCCCCACCGCAGCGCGATTCCGCTGCGGCCCATCCGGCACACGCGGGTAACGAATCGATGACCATATCGCTCGATGCGTCCGGTTTCGCGGCGAGTTGCAGTGCCGGGTCGGCCGGCTCCACCACCCAACCGAGCA…	SVESSAVVSGDYDK;GVGAIPPPPQR;ANDPPPVMPDVLK;
ASTF_00021291	XLOC_011634	3493	480	0.7096	-0.150458	0.0109626	3	2	4	CCCCCTTAATTCTAGCACATTTATGTCACTCTTGGCAATTCAAATAAATGGACTAACATTAATGTAATTACATTATGGAGTGATGTTAATATATTGACATTCGTCGTTTATTTTTAGATCGGCGAGGCAGCAAAATTAAAACCTTTGGAAGTTGACCTAAAACGGCTTGAGGATCTGTCGGATGCTATTGTGCAGGATTTTGCGTTAATGCGAAAACGGGAGGAAGAAATGCGTGATACGAATGAATCAACGAACAGTCGGGTGCTTTTCTTTAGCATTTTTAGTATGAGTTGCCTATTAGGTCTCGCTACATGGCAAGTGTTATATTTGAGACGGTACTTCATTGCAAAAAAACTAATTTAACCAATTGTGCAACTCTTCTATTTTTGATTTCTTGCG…	LKPLEVDLK;DTNESTNSR;
ASTF_00001558	XLOC_000818	1119	294	1.1379	0.0500213	0.233858	2	3	4	AGCGCTGCCGGTTGATCTGTCACAACAAACCGTACTGAAAATGCTGCTCGGTCCAAGGTTGTGTAATTGTTCGGTGCAAAAATCGACATAAAACCCGATTAAAATCGTCCCTACACATCGCGTTCATCTAGGAAGAGAGTAATGCATACAGATTTATCGCCCCATCTACATTCAACTGAATGCAATCTAATTATCGAAGAGCTGAAAAAGTGCCACTCGGAGAACAAATTTGCCAAATTTCTGGGCATCTGCAATGATCTAGATCGGCAAATGATTGTGTGCTTGCGGAATGAACGGAAAACGCGCCAGAAACTGAACCGAGAAAAAGCACTGGAAAAGCAGAAACGGGTGCAGCAGCTAATGCGAGAACAGCAGGGATGATGACCACCACGCCGGACG…	ICLVGLAK;SISFEVGKFDR;LLSEEAYR;
ASTF_00019988	XLOC_010836	2384	264	0.7052	-0.287024	0.00521213	2	3	4	CAATGTTTCGGCATTGATTCCGCCTCGGGAACCAGTTGCGAACCTACTTACCGGATCGATTTCGAATCGAAACATTATAAATCCCATCACTAGCTCCCAGCACTGTACGTCAACTGGGATGCGTGAATCACAACAAAAACATTGAATTAACACTGCATGTCCGTGTTTCTGCTCAGCAAGCTGTTTGTGAACTGTGTAATCGTGCGTTTACAAAATATCTGTTCCAACATTTATTAGCACCGAGCGATAGTCATCTTAACAAGTGTACTCATCAACACCAATCCTACAATGGGACAACAAACTGTTGCCAAAGACGAAATGCTGAAAATGCGTACCGACACTTCCTTCCTACCTGCATGCTGGTCGGATGATAGACGTATGGGCATTCTCTTAGCCGAA…	ISALENLQILLLK;QLNAESYDMK;FAGANPAAQPITSIEK;
ASTF_00019989	XLOC_010836	2572	333	0.6255	-0.34784	0.0050792	2	3	4	CAATGTTTCGGCATTGATTCCGCCTCGGGAACCAGTTGCGAACCTACTTACCGGATCGATTTCGAATCGAAACATTATAAATCCCATCACTAGCTCCCAGCACTGTACGTCAACTGGGATGCGTGAATCACAACAAAAACATTGAATTAACACTGCATGTCCGTGTTTCTGCTCAGCAAGCTGTTTGTGAACTGTGTAATCGTGCGTTTACAAAATATCTGTTCCAACATTTATTAGCACCGAGCGATAGTCATCTTAACAAGTGTACTCATCAACACCAATCCTACAATGGGACAACAAACTGTTGCCAAAGACGAAATGCTGAAAATGCGTACCGACACTTCCTTCCTACCTGCATGCTGGTCGGATGATAGACGTATGGGCATTCTCTTAGCCGAA…	ISALENLQILLLK;QLNAESYDMK;FAGANPAAQPITSIEK;
ASTF_00002142	XLOC_001140	1233	258	0.7229	0.067246	0.0542143	3	2	4	CCGCTAACCATCCGTGGCTGTCAGCACAAGGGTTGAAAGGGTGTTCATCGCCCGTTCACCGCACCAGATTCATCCGCACGATGCCCGATGAACGTTTGACAGCTACGGTCATCAGCGACAAACGAACGAACGGACGGACGGTGCGGAGTTGTGTGTGTGTTTTCCCTGGCTTTTCGATTGAAAAGTGGTCCAGTGCTGTGGCGTGTTGTTGTTGTTACTCCCATTTTCCCTTCCGTGTTTCGGTCCATGTCGATATCGGTTTGTGCAAGAATTCGTCCCGTTTTATCGTCCGCCACACGGGTAACCTTCCGGACACCAAAAGTAAACTCATGCGCATTGTTTGCTAACAACAGTGTTGACAGCGTTGTGGTGGTGAAATTGGCGTGTTGCAAGAGGTGT…	AHVNAVFFNQLR;QRPEDEIQYLISDK;
ASTF_00012097	XLOC_006551	5714	765	1.2025	0.297178	0.0796713	6	2	4	AAACAAAGGAGACTGTCGGTATCGTAGCTGGTGTTTGTGTCGAGCAAATTTTGTGATTCTACCCAATATTACTGTGTTTCGTGTTAATTTGTGAAAAATTTGTGCATCATTGCATTCCCCAGTATAATTAGTGAAGTCAAAATTCTACCAGTGGCCTAAATAAATGGTTAAAACACGAACAGTTTGGCAGCGTAATACCGGATGATCTAGGAAGCTGAACCGCATAGCAGTAGATAGAAGTAAGGCGAAATCTTCGCAAACGCCTAAGACTGATCGTAAAGAAAACGCAATCATCCATCTCATCAAAATGGCAAATTTGGTTCCATCGTCACTGTTGCAAACCGTTCAGGAGCTGCTGACGCGTTTCTACAGCCCGCAGACGAACAATGAAGAGAAAAA…	GDSIQTVFDSINGER;NLNPADQQQLR;
ASTF_00003761	XLOC_001957	1237	195	0.6751	-0.296733	0.0118185	2	1	4	TGTCGAGCCTTCGTCGATTGTCGTATCATTCGAGCTGTCCTTCCTGAGTGAATTTGGATTGAGCTATAAGAGATGATCCCCGGAGGCTCCAATTCCAAGTCTCATATACCTATATGGATCTTATTTATTTCTCTGGCGTAAAGCAATCCTGAAAATCTCCAGGTTCTGACATCTGAGACATGAGGAGAAGGTATACATAAAGTTGGTACTCTGGCATTTTCTCCAAGATTTGCATCACACGGTGAAGATCTGATCTCTCTGATCTGATTCACTCATTACAGTAGAAAAAAAACCGTGGCTTTCCGCGAGCTTTACAGAAAAGGTGCCTCATTCGTAAGATCTTCCGCCCGCTCTATTTACTTTCCACTTCTCCCCGCGCAGATGTGAATCATGCGATAA…	EGYDIDDANFGK;
ASTF_00020586	XLOC_011170	3587	270	0.9832	0.288646	0.00967606	3	1	4	ACCACTACCCCACCTGGCGCACTGTGGCCAACAACCACCGTTCTAGTCTTCCCCCCAAATCCTGCTCAGGCTACTTCACGCTGCTAGCTTCACAAAAATTTCGGCCCATCTACTGTCGGCTAACGGCTGTAAGCTTATTAGTAGCGGCAGTAGCACTAGCATTAATGTCGATCAAAAGTCAACCGGCGCAGACAGCAACGCATCCATACCGGCGGTGGTAACGGCGGCGCCCGTCCCATTTCGTAGCTTCTCCACCATTCCACCACCGTCCGCGCAGCATCTGATCCGATTGAACACGATCGAGGAAGCGAGAAAGCGCGAGGAAGCGAAACAATCCGACTGTCCCTGCATTTGTTCGTGACGACTGTTGGTGTGTGTGTGTGTGTGCGTGTGAAAATG…	LIEMYKVDEEEYK;
ASTF_00021520	XLOC_011814	185	48	0.8374	0.312062	0.0847715	1	1	4	AGTACGAACCAGTGTTCGATTCGAGCACGAGCGTCCTCTACCTTAACCATCTGATCCTGTACGAGTGTCAAGGATTGTCGCAGGAGCTGGAGCAACTGTCCCGCGAGCGTGGTTCGCCCTGCTTCCGGCTGCAACCGATGCACTGCAACACCGTCGTAGCTAATTGGGCCCGCGGATCTGACGTA	LQPMHCNTVVANWAR;
ASTF_00002899	XLOC_001505	1313	342	0.7932	-0.0440261	0.0930024	5	2	3	TTTCTGCTCCGGTGGGCAAACTCTGGCTATTATTTTAGTGTACCCGGTGTTGATTGAAGCACTTCAAACAATCCCGTCCATGCTGCTAACACGATTAGGTGGCTGTATTTTTATGTCTTAAAGTATTGCGAATCGGTGTGGTGAATAGTGTGTTCCGGTCGCTAAAATTGCGTACCAATTCCATGTGACGAGCGGGAGCGAAAAAATAAACTCCTGTGGACGCCGGGCTTGTACGCAATCAAAACAAACCCAACCTGGTCGAGTGGTTGCTGCAGGCAGGTTTGATTTTAATCTAATAAAATTGCCGCTTGCCTGAGCATATTCCGGTTTTGGCATCGTGCTAGGATCAGCAGCAGCAGCAGCAGTAGCAGTGCGAGATTGAGGACAGTTCGTGCAAAA…	RPDTSQPGR;GDADNVNHSDGIGQTNVR;
ASTF_00023382	XLOC_013570	451	324	0.5269	-0.176255	0.0845308	1	2	3	TTGAAGCTAATTTTCACTTTTTTCTCTCCCGTGTGTGTATTACCGCTTCGTTGCGTTAACCAGTAGTGCAGTTTGCCGTTTTGCCGAAGGCACATATTTCCGTGGTGCGTATTTCCCAAGCGCCCCCGCTGACGGGGGCAGTTGCACGGGAGTTGGTTTGTTTGCGTATTGGCGTAATAATCGCAATCGTGCTGCGTATTGCGTGTGTGGGCCACTTCTTCTGACTCGGTCGTTGTGTGTGTGTGTGTTGTTTTTTTTCTATTCTTCACTTTCCCAATTAAAGGTGGTTCGGGATAGCTACCGGATAGAGGATAAAAATAAACCATGAACAAGGAAGCAGCTGAGGACTGCGTCGAGCGGGCCGTAAAGTACTTGGCCGAGGGGAAAATCGAGAAAGCG…	EAAEDCVER;MNKEAAEDCVER;
ASTF_00002293	XLOC_001211	954	300	0.7528	0.090514	0.122762	2	1	3	GTCAGCATGGGACGGGGGTTCCCCTGTTCAGTTTTTGTTTTTACGGGCGCTCTTCGACAGGCGCTGGGCAGTATATAAAATTGAGCTGATCGATGCAACGGTATCATCAGTCTGCAGGAAGCGTTCAGACAGCAACCATCCTATCAACCTATCAACCGGCAGCCAACCAACCAACCGAACCGTATCAACAATGAACTTCAACAAGATCTTCGTCTTCGTCGTTCTGGCGGTACTGCTGCTCTGCAGCCAGACGGAAGCGGGACGCCTGAAGAAGCTGGGAAAGAAGATTGAAGGAGTTGGCAAGCGTGTGTTCAAGGCAGCTGAGAAAGCTCTCCCGGTGGTGGCAGGTGTCAAGGCTCTTGGATGAAGAGAGAGAGAGAGAGAGAGAGAGAGAGACAA…	ALPVVAGVK;
ASTF_00013015	XLOC_007018	2891	549	1.0472	-0.0360027	0.141984	1	3	3	GCAAAGAGGGCATCAGAAGAGACACCCAAAAGCCGTACCAAAACGCCAGAACATTCTTCATCGGCTCATGCGCGACCCAAAAGCCGTACCAAAGTTCCAGAATCTCCTTCAACGACTCATGCGAAGAAGGCATCAGAAGAGGCGTCCAAAAACCGTACCAAAGTTCCAGAATCTTCTTCAGCGGCTAAACGATCGCAGCCTACTGTTGGATGCAATGGCGAAACGGGTACGCCTACCGTTGCCAGTTCGCAAACACCATCCAAGCAGGTGTCAAACGCGGCGAAGGCTGCGCCTGCTGCAACAGGTGTTGAAAGTATGAAAGCCTCAAACCATTCCGCACAGCCGCCTCGATCCGTCTCGTTCAACATAGCGGGCGACGCGAATGCTGACAAGATCATA…	VVANESNSGSQEQVSTVTK;IIGHTVNDDAQQK;TKVPESPSTTHAK;
ASTF_00002898	XLOC_001505	2816	342	0.7932	-0.0440261	0.0133001	7	2	3	TTTCTGCTCCGGTGGGCAAACTCTGGCTATTATTTTAGTGTACCCGGTGTTGATTGAAGCACTTCAAACAATCCCGTCCATGCTGCTAACACGATTAGGTGGCTGTATTTTTATGTCTTAAAGTATTGCGAATCGGTGTGGTGAATAGTGTGTTCCGGTCGCTAAAATTGCGTACCAATTCCATGTGACGAGCGGGAGCGAAAAAATAAACTCCTGTGGACGCCGGGCTTGTACGCAATCAAAACAAACCCAACCTGGTCGAGTGGTTGCTGCAGGCAGGTTTGATTTTAATCTAATAAAATTGCCGCTTGCCTGAGCATATTCCGGTTTTGGCATCGTGCTAGGATCAGCAGCAGCAGCAGCAGTAGCAGTGCGAGATTGAGGACAGTTCGTGCAAAA…	RPDTSQPGR;GDADNVNHSDGIGQTNVR;
ASTF_00021573	XLOC_011856	123	0	0	0	0.00256608	1	2	3	TAGGCCCAGTATGTCCCACGGCACGGGACTGGGACTGCAGCGTGGCCAGGAACGTGACTTTGTACTATCGACGACGGAGGAGTTTGTGAACAAATTCAACGGTACGCGGGTGATTAACAAGGT	DFVLSTTEEFVNK;DFVLSTTEEFVNKFNGTR;
ASTF_00001706	XLOC_000889	439	225	0.9277	0.46746	0.373072	1	1	3	CGACTTGTGCTCGCCTTGCTCGAAGACCCCCGACCCAAGCCACATCCATCATGAACAAGCTGTTCGGCCTCCTGCTGCTGTTCGTTGCCTGTCTGGCATCGTTCGCCACTGCCCAGACTTACACGCGCCAGATCCAGTGTACGGACTACAACAGCTGCCTGTGCCAGTCGCTCCCGCGCATGATTGCTGCTGCCCGTGGTCGTGCGGCCACCGCCACCATCACCAACCCGACCACCGGCGTGCGGGAAGTGTACGACCTGTCCAGGCCCATGTCCGGCGCGCTGCGCTCGTTCTGCGCCAGATACCAGGCGTCGGCACGCAAGGGATAAGCTGTTGTGCAACGAATCTTGCTATCCCATCTAGCACGCATCGACTGTTTGTGCCTTATGTCGCCACGAT…	AATATITNPTTGVR;
ASTF_00012761	XLOC_006886	1238	165	1.0214	0.50644	0.147316	1	1	3	CCCTCCTATCGGTGTAAGGTCATTCATTTACCAATTTTCAAACTGAGCTGCTCATTGAGCTGTACGTATTTGGGTCGGGGTTTTCTGTGTGAGTGTGTGGGTTTTTTTTTACTCTCTACTACCCGGTCCCTTTAAAATCCAATTCTAATCTCATACGCCTTCTTTCCCTCGTTACGGAAATCTCTCTCCATACAGACCTCACACACCGACTGGCACCGGTCGTACACATCGGTTTCCCGCTCGGAGATGATACTGACCGCGGCAAAAACGATAGCGACACTCTACAAACGAGCCGTACTCGACTACGAACACACGGTAGCGGCAGCCGCCACAACCCAACAGGATCCGATGCAGGTGGAGAGCAGCGTCGTCACCGGTGGCGGCGGAGGACCCATTGAA…	SEMILTAAK;
ASTF_00021688	XLOC_011956	474	222	0.6316	0.308378	0.135301	1	1	3	TTCATTCGCTATTGCTTGCTCTTTGTCTTCTCGTCAGGTGTAACGGATGGTTGGTCTGAAAGGAGCGACTGAGTAGAGCTTGCGCCGGGCACCGAATGGAAGCAACGTCGGTGAAGGCGTGCGATTGGGTCAGAACCGTATCCGGTAGCAACAGCTCCTCCCAGACAACCGGCGAAGAAGGTGGCTCCATGTCGCCACCCGCTCGGAGGACACTGTAAACCATCCCAACGACAGCGTACGTGAGCACGCGTTACAAGCCAACGACGAGGCCATGGGCGAGGAAAGTTTGGAGCGCAGCGACGGTAAGCTGCTGCAGCCGCACGTGGCCGATTACAGCCCGGTTCGGCAGGAGCATGCTCAACAGCATCCTTCCCAGGGGCCACCACCACCACAGGACGA…	QEHAQQHPSQGPPPPQDEPSPDEDSVHQR;
ASTF_00004874	XLOC_002567	723	327	0.963	0.0297869	0.282693	2	2	2	CCGTTCGTTAGCAGCTTCGTCGGAGCTTGTCGCACTGCACTGAACAGTATCAAAGTTGATCACAGAAACGAAAGGCTGAAAAAAGTGAATTGTGAATTGTGATTAAAGTAGCACAATGGGTAGTTTCCTATCCAAAGACAAGCAAGCGAATAGCGAGCGCAAGAAATCTAACTCACTCGAACAGACGGTAACGTCAAACGGCCGTACCACGAGAATTTCCTCCGTGACAATGACGCGAGAAGTCCAAATATCGCAATCGATGACCAGTACAAGAACTTCCGTAAATTCTGTAACTTCGCAATCTTTTCGATCTGCTGGAACGATAGCACCAGGCGCAGCAGTGATTAGGTCTTCGAGAGGACCCAGATCGATTAACATCCAACCATCGGCCGACGCTTC…	TSVNSVTSQSFR;EVQISQSMTSTR;
ASTF_00018235	XLOC_009830	1830	276	1.0227	-0.00431983	0.0584798	8	2	2	CGTCAGGACGCGTTGGTCACGCACGCAATTTCCGCCGACAATTGCTCTCCAGTGTAAAGCTCCTCAAAAGTGTTTTGTTTTAAAAATGGCTAACGAAACCAGTTCCCCCACTAGCAGCAAGCTAGTGCTGATGAGCGATCAGCTATTCGTACGCGTCTATACGGCTGGGACAAACGTGAAGAAATTTACGCAGCAAGCGGACAAGAACAACCAACCCACCAACGTTCTGGAAGTGTGCAAATTTGTACTACGTCTCATCGAAAGCCGGACACTGCCGTTGGAAGTGTGTGCTAAAATTGTATGCGGCATGGGGCGCATTCGTCTGTATCACTTACAGAAATTGTTTGCTGAATTTACGGTACTCAGCAAGCGCACTTCATGCGATCGGCGCATTGGATA…	SCDPSASEPQK;QHITTTEPVQEPEIR;
ASTF_00000191	XLOC_000089	2622	312	0.6605	-0.101295	0.0078267	3	1	2	CACTTATTACACACGCACACACACACACACGCTAAAACTTCGCTCGTCTAACGCGTCCTGTCTCGGCAGCGGCTGGATCAAGAAAGAGGCCGATCGGTCCCGAAGCCCGAACACGAAGGATGAACCGCATGGCACGTCGATCGCTGTCATCCGTTGACAGGACCGAGTAACGGCGTTACGGTCCGGGCCTCCGCTGCTTGGTCGAGTATACACTCAACACTACCGAACTACCTCCATTAGATTTCCCTTCACGTCGCCGTTACCAGTGACCTAACACTAAGTTGGTGCCATAAAATGAAAGTGTTGTTTTTCTCGGTCATTGTACTGACTGCATGTGGATGTATCGCATGCGTACCGCTCGTTGCTGAACCGGACGAGAAGTGTGAGTGGAGGTACACG…	TPCPKPSIVCPTEETK;
ASTF_00021719	XLOC_011985	1785	285	0.6109	-0.201486	0.0129113	1	1	2	CCATGAACTTCAGCACGAAAGCTCTACAACGATTCTGCTTTCTTTCCCCCTTTTTTCTCCCAGAGTTATGCCACGCTGGGCCGTGCAAACAATAGCAGCGTCACCTCGACGCTCAGTCCACTTAGTCAGCAGGCGTCCACGGCGACGCTGCCCCTGCCGTCGATGTCCGTTACCGGGGTCGGTGCGGTGGGGAGCCTGCTGAGCAGTCCGGCCTCCCAGTCGCTGGTCACGTCGACGCTGAACGAGTACCGGTTTCGGCCCGAGGTGGTCACCACATCCAACCGAATACAGGAAAGTTGTATATAAACGTGTGTAGAGCGTGCCGGCGCCGCTTAGAGTGTAAGTGTTTTGCTGAGAGCGGGGGCTGAAGCGTATATCCAGCCGTAGCCATACATATCC…	FRPEVVTTSNR;
ASTF_00021871	XLOC_012114	622	207	0.9957	0.0880883	0.165192	2	1	2	TTCATGAAATTTCTTTTATAAATCATTTTTCTAAAATTTTAAAATATTAAAATTTGTGAGAACCCTTTGCAAACGTGGTATTCCACCAACACCTCTGTTTTGAGGTAAAAAAAAGGAATAATCAAAACGGGAGACGAATTCGTGAGGATTAGGCATTTTTGCAGAAATTAACAAATTGCACGTAGATTTGATGGTTTGACTGTGACTGAGGACACAGCGCCGAGATGCGTTCGAAAATAATAACAAAGATAGTACAGAGCGATTAAAGCATCAATCAGGCACAGCGAGGAACTGCTCGCGCGCGCTAGTGATTGTGATTGACCATACGAAAGCCTTTGTTATCTGTTGCCGCTCAAAACGCATTCGGTCACCTTCCGAATCACGAACGCATTCAGTACA…	TFENVIECWPEAAIFCSALLPFK;
ASTF_00022193	XLOC_012404	1273	330	0.8424	0.0704904	0.128825	1	1	2	AATCATCATCACCCAAAGACACCCGAGCAGCGATCAATAACGAGGCAATACTGAAGGAAGAGCATGAGATTGCGGTCGAAGAGAAGGAGAAAATAGTGCAAGAAATCAGTGAACTGAAGAACGCAAAAAAGGTACTCGAAGCCGAGGTGGAAAACATTAAGGAAGAGTTGGTGAAGAAGAACAAGGAAACGGAACAGCTGGTGCTGAAGAAGCTGGACGAGATAGTGGAAAAAATATCCGTCCAGAAAGCTAGCATTGGGTCGCGGGAAGAACCGGAACAGAAACTGGGGAACGGTCCAGTACCGTCGATCGCAGCAAAGAACGATCCCATACCGAACGATCCGATCGTGAAGCTACTGAAAGCCGGTGGAAACAATAAATCGATTCCACAGATGCAGG…	VLEAEVENIKEELVK;
ASTF_00009688	XLOC_005252	1107	84	1.0893	-0.238689	0.0207094	5	2	2	GCGCGTTGTGCTCCTGTATTGCATTCTCTGGCGCCTCTGTCCGTCCGTGTGTGTTTGTGTGTGTACTACGGACCAGACTGGACGCAGAAACAATAGTTTTTGCTCGAAATCACCAGCCTACGAAGCGGAGCAAGTTGTTGTCTGCTGTGCCTGGTCCGCTCACATTGCCGCCAATAGTGCTGTGTGTGTATAATGGATCCACTCGGCGGTCCACTAGCCACCGAAGTTGTGAGTCCCAGATAAGTGTGAAGTGAAGATGGTTTGATTGATTAAAGATATTTTTATCTACAATTTGAGAAGAATTCCCCGCGCTCTAAGTTGTGCTCTGTCGGGCGTGAACGCGAAGAAGAAAGGAAACAAAAAAAAAAGGTGCACAGATCTGGGTCGTCTCCGCTAAAT…	REQIAEIIR;LGQTLMHVPR;
ASTF_00009689	XLOC_005252	1799	84	1.0893	-0.238689	0.00824022	4	2	2	ACTTCCCTGTCTCCCATAAACATGTCGATTACGCACGGTTTAAAAAGATTTTAACTCGAAACTTTCACCCTTGTGAACCGCGAAATAATGTTGTGTTCCGTTCCAATCTTGACTTAACAGCAAATGTTATGGATTTCATTCACATAAATCAAGCAAATGTGTTGTTTTCAAGCGGACGGTTCAAACGTGTAGCTGTGTGCGTGCCAGATATCTAAAAAAGCAAACGCTTGCAGTCATTTCCCGTCTTTCTCTCACCTCCTGGGACGATCCGAACGAACAACAGTGCAGTGTGCGAAAAAAAGTATACACAAAAAGAACGACACAGTGGACATACGAAACCAGTACTAGAGAAACAGTGTGTGGAGCGTGTGGCTGTCGCGCGTTGTGCTCCTGTATTGC…	REQIAEIIR;LGQTLMHVPR;
ASTF_00009690	XLOC_005252	1886	84	1.0893	-0.238689	0.00733377	5	2	2	ACTTCCCTGTCTCCCATAAACATGTCGATTACGCACGGTTTAAAAAGATTTTAACTCGAAACTTTCACCCTTGTGAACCGCGAAATAATGTTGTGTTCCGTTCCAATCTTGACTTAACAGCAAATGTTATGGATTTCATTCACATAAATCAAGCAAATGTGTTGTTTTCAAGCGGACGGTTCAAACGTGTAGCTGTGTGCGTGCCAGATATCTAAAAAAGCAAACGCTTGCAGTCATTTCCCGTCTTTCTCTCACCTCCTGGGACGATCCGAACGAACAACAGTGCAGTGTGCGAAAAAAAGTATACACAAAAAGAACGACACAGTGGACATACGAAACCAGTACTAGAGAAACAGTGTGTGGAGCGTGTGGCTGTCGCGCGTTGTGCTCCTGTATTGC…	REQIAEIIR;LGQTLMHVPR;
ASTF_00007854	XLOC_004265	1202	255	1.1098	0.29319	0.240143	3	1	1	GTCATTAGTTTGACACTGGGCAGCGTGTTTCAAGTGTTTTCTGTACCCTTGGAAACGCTGGACGTCGCTGGGTACTGTGATCGATTAGAGAGCGAGCTAGCGGCAACGCGTACTTCGATCATTTTGCTACAAATTGGACGACCAAGCAAGGCGTACCAAGTTGTATCGGGCGATCGGAACACGACCAGATCTTCGCACTGTGAGTTCCTCGAGAGTGACGTGCGGGTTGGTGAGGATCCTAACGCAATGGAACTTATTGTGCAGGAAATTCAGGACAGCGTTATCGCTGTAAAAAGGCATCTCATCGTGGAGTACATAACCCTTCTCACACTGGACGGTGAATATCTGCTGACCCTTGAGCGTACCGGTGACTTGGAAGAACCGATCGGACTGGAACCA…	TSIILLQIGRPSK;
ASTF_00008603	XLOC_004671	2697	471	1.0248	0.335637	0.195627	5	1	1	GGATTTGCTTTTTTTATGTAACATTTGCTATTCAAAAATGGCAAACATTATCATTTGATGCGCCTCTTGTGCCGCTTTATTTTGGTTCGGTGTAAACGTGGCTTAATGTGACGTTCGACGAACGAATCTGCTCCAGACCGTTTGTAGCGTTTGAAAGCGAACGAGAAGTAGGCTGCGACTGTTCGCCAGAATTCGGGAGAAGGCGACGCCGGCCCGAACGAACGTGTGAGGTAAATTGTTAGCAGAGTGGTTAATTGCTAGGAGCAGCAGAACGCACAGAAATGGACGCAGCGCAGCAAGCATTCCAGCATGATCTTGCAATCATGGTGTACCACTATCTGCTCGAATGGCGAATGGAGAGTGTGGCACAGCAGTTTGCCGCTAGCTGCCCGGTACTGG…	QLNYEAELK;
ASTF_00011789	XLOC_006394	1099	129	0.7429	-0.408526	0.00749915	2	1	1	GTCACAGTGAAAACAGAAAATCTTCCTAATAGCCAATCGAACAAGAAAGTTTCCTCCTCGTTCAATGGAGCCTTCAAGCTGTACCGGTTTATGATCTGCGAGTGGTTTTACAGCCACATTGATCGGCCATTGTTTGCGGAAGGGTATAGCAAGAACTTGGATTTGGGCGTACTGTTAAAACTCCATTTTCCATCCCTTTTCACGCGCTCGTTGAATCGAGCGCAGTGGAACTTTGTCCGCTTGGGACTCCGGAAGGAGAGGCCGGTTCGTCGCTTGTCGCACGCATTCTTCCTTCAGGAGCGAATCAATCTCGAGCGCCGCCGGGAGAAGTTGCGCTTTCTGATGGAAAATTCGATGATCGAATATTTGGACGACGATATACCGTCCACCATCCCGAAA…	LSHAFFLQER;
ASTF_00012987	XLOC_007003	2916	198	0.5229	-0.697653	0.000312485	6	1	1	CGTTAGACACAGTTTTGATCGGAAATTTACGTAATACTTAGGAGAATACTTATATGTCGTGTGAATTTGTAAAATAAAAGTGACGAAGACATAACTATATGTTACTGCTGCTTTATCACAGAATGGCATGAAAATGTTCAGTTTGAAGCGAAACGAAATACATTGTGAAAGTTTATATTTGTCGCATAAAGTATTTAAGTGTACTTGTACTTATCACGCCTTCGGTGTCAAGTAAAAAAGCGAGTGAACAAAAATACTACCCGCAAATGGAGGTTTCATATGCTGCGGACAGCACGAAGAGACTATACGAAGCGTCATCTACCTGTAAAACTGTCCACAGCAGTAAAGTGACATGCTCTAAAGATTGTTCAATCGATTCAAACATTCAAGACAGTGAGG…	EHGVDTVDSPGVVHVVHSER;
ASTF_00013380	XLOC_007223	797	153	0.8437	-0.591527	0.0121603	3	1	1	AGAGCACACTCGACTGACGCTAGACCCAGATTCGGCAAACGGGGTGGCTACCTTAACCCGGCAGTATTTGGACAGGACGAACAGGAGGTTGATTGGCAGGATCCAGCATTTTCGAGATGAACAGCTTCCGACCAACTTCTAGATGGCGTCCCGAGCTCGGACACAACGGTACCCCGTAACACATCGTGTTTCTCCTGTCCCATCAAGCTGGCCGCTAGCCAGTGCTAGCCTATGACGATATGATGTTGATCCTTTCGCCAAAGCTCCATCCAAAGTTCGGTGCATTGTGAATAGCAATTCAATGTTGCCACCCATACAAACTTACGCTCAACCATTTAACCTGCTTCTAGTTCTACACAACTCTTTTTCTTCGATTGTTTGCTGACCAGTATGTAGTAA…	IQHFRDEQLPTNF;
ASTF_00015950	XLOC_008598	1617	279	0.6865	-0.26298	0.0165866	5	1	1	AATGCTGCCAATTGGAAAATAAATATAAATATCGTAACAACGCAGCCGATCAGCGTAACCCCACGGATAATTAGGTCCGATAGAAACTGGCGCCCCGGTGATAGAGGCCGGCACCAGACAAACCATCACACACCGAAAGACTGTTAAACAAACCTCGTAAAGCAACATCCTACCTCTACGAATTCCTGCAAAGTCTTGCACAACTCGACGTAAAAGGGGAAAAGAAATGTTCAAAGTTGCACACAGTAATGCGATTTACAAAGCATTGCAGGCACAAGTAAGGTACACCCATCGGACGCACTACAATGTGCTAAAACTACAGCCAAACTGCTCGTCGAGGGACGTCCGAACTGCGTTCATCCAGCTTTCTAAAGAACTACATCCTGATGCGAATGTTAG…	QNAITHAEVR;
ASTF_00017902	XLOC_009643	962	330	1.0989	0.164826	0.37726	1	1	1	AGCTCCGTATGAAAAAGCAAATTTCTATGGTAAAAAGTGATTGTAGCCGTACGAAAAGTGTGACAAACGCATGGTGAATGCGCCTAGCATACGGGACGCATAGAGAAAGATGCAGAATGCTGAACAATCCGGAGTGAAAAACCGGGAGAAAATTGTTAAATCAGTGAATCAGCAGACTTCGTTGAAATCGCAGCTGCAGCAGCAGCAGCAGCAGCAGCAGCCTTCATTGTCGTGTTCGTCTTCGTTGTCTTCGTCCTCCTCAACATCATCGGAAGGAGAAGAGACGGCGGCATTAGTTTCCACTGCCCAGGAAATAGCAGAAACAGGAGCAGCCAAGACTTCGTCATCGACATCAAAGAACAATAGCAGCAGCAGCAACAACAGCAGCACAATCGGTGG…	SSTTTTTAGATKPAPPPSAVLVGAATGSTSAPGAGDGVGTGK;
ASTF_00019540	XLOC_010602	6568	615	1.2588	0.786874	0.0266377	2	1	1	TGTCGACATGTCTGTTTATTTCCTGTCTCTCTGTATCACACTCTGTCTCTCTCTCTCTCTCTGTCCGTCTGTCTCTCTCTCTCTCTGTCTCAACTATCTCTAACTCTCTGCGCGGGGCTGGTGGGGTTTGGGGGAGGGTTTCTGCACAGCAGTTAGCGAGTGTTCGATGGGATGTCGGGGATAGGCGGGATGATCGGTCAAGGGATAGGGATCGGTGGTAATGTCGGCGGCATGACCGGGATGCAGCAGCAGCAAACCCCGATGCAGCAACAGATGCAGCAACCGATGCAGCAACAGATGCGTAACAACCAGCAGCAACAACCGATGATGCAACAGTCCCACCAGCAGCAGCAGCAACCGATGATGCAGCAGCAGCAGCAACAGCAGCAACCGACACCG…	IQEMAAPGGDILSK;
ASTF_00021289	XLOC_011632	836	303	0.7325	-0.165631	0.0795979	1	1	1	GATCATCTCGTATGGTGGCGCAGCGATCGAATCGTTGTCGTGCGCAAACCGGCGGTGTATTTGATACGCGAATTGAACGATAACAGAGAAGGAGACATCACCCCAAAACCACCCCGTTGCAGTTGTAGTGCAATTCCAAAATAAAAAAATAGAAACCAAACGAGCGAGCAGGAACACCTTCGCCGATGACAGGAAGTTGGTCTGCCGCGGCTACTATCAGTTACAGTGGAAAACAAAAGTTCAACTCCACAGTGTGGTCCGGTGCTGATTAGCAGCAGAATCGAAGACAGAGCTAGTGACGCCATTTGCACCACCTCAGTAATTTCCTACCGAGCACTAGGTCGGTACTCGGTACTAGGTGCTCCGTTACGCAATCCCTCAATCAGGCAGGCAGCTCCT…	NDMLNIPAVDLAER;
ASTF_00021866	XLOC_012111	182	30	0.7972	0.250749	0.0573406	1	1	1	CGAGCCGGTGTTTGATTCCGGTACGAGTGCATCCTACGTCTATCACATGATACTGCACGAGTGTCAAGGATCGTCGCCGGAGCTGGAAATTATGTCACGGGAAAATGGTTGCCCGTGCTATCGGGCGGATAAATCGATACTGACCTGCAACTCGATCGTGGCCGCCTGGACGCGCGGCTCGG	SILTCNSIVAAWTR;
ASTF_00022320	XLOC_012524	1152	411	0.9204	-0.168677	0.203466	2	1	1	CTTCAGGTGGCCAAACTGGTGCTGGATGATTACTTCAGCAGCAACGAATTTCTGGCCTCGGTAGACATGTGCTCAAGTTTCGATCTACCGAACTCGCTTTCCTCGCCGGTGGGAGCAATGCCTGGCCAACATTCGCTCATCACCGGCACACCGTTCGTGGACAGTGGCGTCGGATTGAACAACATCGGCTCCACGGTGCACGGCGAGCCGGGCAACAGCAGCATCGAGCTGATGGACGACGATGTGTTTATCGTCGAGGCGGGCTCTGGCTATAAGCCGAACGAAGTGCAGAACAGCGGCAGCAGCGGTACGATTTCAGCCAACAGCAACAATGGTCTGAGCCGGTCTCGTCGGAGCCATTTTTCGCGCAAGGATAGTGCGGGCGATGGGCTGAAGGAG…	SPYSWDLPADWKR;
ASTF_00007818	XLOC_004244	1762	180	0.4771	-0.256246	0.00312927	1	1	1	CTGTATTTAGCACGTGCTTCTAGTGCAATTAACAGTTCATTAGCATCATTCACGATTTTGCACGCTCCGGACTCGTGCGATCTCTTGATGATGGTGATGTGATGAAGCCATCAACAACTGTGGCAGTCGGCCGTGTGTGTTTATACAACCGGCCGGAAGCAGAGGTGGGCGTGCGATGTTTGGAGTTTCCCTGAATGAAAGATCACGTTCCGTGCTTGGCGGCGGCGGCGTCGTTGATCGTTAGGTTCGATGCGGTGCGATCGATCTGGTGATGCAGTTTTATGGGCAGCGAACGTGTGTGATGTAATAATTGATGTTTACAGTGACAGGCTAGTTGACAGATTTGACACTTGCGTGTGAATTGGGGTAGCGTGGCGCAAGAGTACACAGTTCGCTGTT…	ANSDAALGK;
ASTF_00012989	XLOC_007003	3099	198	0.5229	-0.697653	0.000244098	6	1	1	GGTGCAGAGACTTGCGAGGAAAATACTTAGGAGAATACTTATATGTCGTGTGAATTTGTAAAATAAAAGTGACGAAGACATAACTATATGTTACTGCTGCTTTATCACAGAATGGCATGAAAATGTTCAGTTTGAAGCGAAACGAAATACATTGTGAAAGTTTATATTTGTCGCATAAAGTATTTAAGTGTACTTGTACTTATCACGCCTTCGGTGTCAAGTAAAAAAGCGAGTGAACAAAAATACTACCCGCAAATGGAGGTTTCATATGCTGCGGACAGCACGAAGAGACTATACGAAGCGTCATCTACCTGTAAAACTGTCCACAGCAGTAAAGTGACATGCTCTAAAGATTGTTCAATCGATTCAAACATTCAAGACAGTGAGGCAAACAATCGA…	EHGVDTVDSPGVVHVVHSER;
ASTF_00012986	XLOC_007003	3100	198	0.5229	-0.697653	0.000243769	6	1	1	AGTTTTGATCGGAAATTTACGTAATACTTAGGAGAATACTTATATGTCGTGTGAATTTGTAAAATAAAAGTGACGAAGACATAACTATATGTTACTGCTGCTTTATCACAGAATGGCATGAAAATGTTCAGTTTGAAGCGAAACGAAATACATTGTGAAAGTTTATATTTGTCGCATAAAGTATTTAAGTGTACTTGTACTTATCACGCCTTCGGTGTCAAGTAAAAAAGCGAGTGAACAAAAATACTACCCGCAAATGGAGGTTTCATATGCTGCGGACAGCACGAAGAGACTATACGAAGCGTCATCTACCTGTAAAACTGTCCACAGCAGTAAAGTGACATGCTCTAAAGATTGTTCAATCGATTCAAACATTCAAGACAGTGAGGCAAACAATCG…	EHGVDTVDSPGVVHVVHSER;
ASTF_00012988	XLOC_007003	3135	198	0.5229	-0.697653	0.000232521	6	1	1	CAGAGACTTGCGAGGAAGTGCGTTAGACACAGTTTTGATCGGAAATTTACGTGTAAAAATACTTAGGAGAATACTTATATGTCGTGTGAATTTGTAAAATAAAAGTGACGAAGACATAACTATATGTTACTGCTGCTTTATCACAGAATGGCATGAAAATGTTCAGTTTGAAGCGAAACGAAATACATTGTGAAAGTTTATATTTGTCGCATAAAGTATTTAAGTGTACTTGTACTTATCACGCCTTCGGTGTCAAGTAAAAAAGCGAGTGAACAAAAATACTACCCGCAAATGGAGGTTTCATATGCTGCGGACAGCACGAAGAGACTATACGAAGCGTCATCTACCTGTAAAACTGTCCACAGCAGTAAAGTGACATGCTCTAAAGATTGTTCAATC…	EHGVDTVDSPGVVHVVHSER;
ASTF_00012985	XLOC_007003	3346	198	0.5229	-0.697653	0.000174895	6	1	1	ATGAAAGGCTCGCGAAAATCGGCTCCCTGCTGATGAAATCGATTGTTCCGCTACCTACTTGACATTTTGTGTTGATGTGTTAGTGCGCTTGTAGGCTGGTGTTTCCGGAGAAGATACGGAATGTGAAAGAAATAACCGAAAGAAATGGTGGAACAATCATTAATATTGTGTCCTATGTGTTACTTCTTCATATTTCTCCGGAAATGCACGGGAACGAACGGACGAACCGCAAGAGGAATAAGGACCCTGCGTTTGGTGTACACGTGAAAATACTTAGGAGAATACTTATATGTCGTGTGAATTTGTAAAATAAAAGTGACGAAGACATAACTATATGTTACTGCTGCTTTATCACAGAATGGCATGAAAATGTTCAGTTTGAAGCGAAACGAAATACAT…	EHGVDTVDSPGVVHVVHSER;
ASTF_00009691	XLOC_005252	882	84	1.0893	-0.238689	0.0278551	3	0	0	CGCGCGTTGTGCTCCTGTATTGCATTCTCTGGCGCCTCTGTCCGTCCGTGTGTGTTTGTGTGTGTACTACGGACCAGACTGGACGCAGAAACAATAGTTTTTGCTCGAAATCACCAGCCTACGAAGCGGAGCAAGTTGTTGTCTGCTGTGCCTGGTCCGCTCACATTGCCGCCAATAGTGCTGTGTGTGTATGTGAGTCACAGTGTATTCGGTTTCGCTTCTATTGGTTCGAAAGTGAAAAAAGGCAGCAAGCAAACGTGTGGTGTGTGGAATGCTTTAATTAAGCGTGAGGAGCTGAATGAAATCGGTATCCATTTGATTGTGCCCCCACCAACCGGCCAAAGACGTCCGTGAGTGCTATCCAAGAGATAAGCAGCCTCTTATAGTGAAATTGATATT…
ASTF_00000004	XLOC_000002	712	51	0.7895	-0.688456	0.00377308	1	0	0	AATTTTTGTGTGAATTAATTTTAATTTTAAAAATTAAAATTTTATAATTTATTCGCAGTAATTAATATTAATTATAAAAGAAATTTTGAATTAGTAATAATATATAGTATTGGTAAAATTTGTGCCAGCTACTGCGGTTATACAAATGATGCAAATAAAAATTTTTAGTATTAGTTAAATTTTATTTTATTTAATTTATTTATAAATTTATTAGGTGAAATTTTTAAATTTATTTATAATTAATTGAAAATTAATTTAAGCTATAAAAATTTTATTATAAACTAGGATTAGATACCCTATTATTAAAATTAAATAAATAAAATACTTAAGTAGTATTAGTTATATTCTTAAAATTTAAAGAATTTGGCGGTGTTTTAGTCTATTTAGAGGAATCTGTTC…
ASTF_00000005	XLOC_000003	3368	306	0.7638	-1.32559	0.000205038	1	0	0	GTTTCTAATCGGAAACATTTATTATCTACTTTGTTAAGATTAGAATATATAGTATTAAGATTATTTATTTTTTTATTTTTTTATTTAAATTTTATGAATTATGAAACTTATTTTAGAATATTTTTTTTAACTTTTTGTGTATGTGAAGGAGTATTAGGGCTATCAATTTTAGTTTCAATAATTCGAACTCATGGTAATGATTATTTTCAAAGTTTTTCTATTTTACAATTGTTAAAGTTTATTTTTGTTTTATTATTTATATTTCCTCTTTCTTTTTTAAAGAATTTTTATTGAATGGTTCAAAATTTAATTTTTTTATTAACTTTTGTATTTATAATTAATTTGAGTTCTTTAAGTTTTTTTAATTATATTCTTATTATTTTGGGTTGGATATAATTT…
ASTF_00000006	XLOC_000004	2202	90	0.7644	-1.48817	9.99132e-05	1	0	0	CCTCTTTTTGGTTTCAATTAATAAGGTAAATTGAAAGTTCAATACTTTTTAAATGCAAATTAAATGTTATAATTAACTATTACCCCAATAAAATATGGGTGAATTTCACCTAAGATTAGGCCGAAACTAATTGCAATATATCGCTTCATATTTAATTATTCATTTCATTCTAAAGCTCCTTGATTTCATTCATGATATAATCCAATTAATAAAATAAAAATAAAAAATAAACTTGTAACTGTTCAATTTATTAAATTTGATGATTTAATAATTAAAATTATAGGCAATAATAAAGCAATTTCTACATCAAAAATTAAAAAAATAATTGCAATTAAAAAAAATCGTAGTGAAAAAGGTAATCGAGAAGAATTTATTGGATCAAATCCACATTCAAATGGT…
ASTF_00000007	XLOC_000005	2365	276	1.0552	-0.769685	0.00540036	1	0	0	ATGAATTAGTTATTGAAGTAATTCATTTAATAAAGTAATTTATAGGGATTCTTTCAATTACAATTGGTATAAAACTATGATTAGCCCCACAGATTTCTGAACATTGTCCAAAAAATAATCCTGGTCGATTAATTAAGAAATTAATTTGATTTAATCGTCCAGGAGTAGCATCTACCTTTACTCCTAAAGAGGGAACAGTTCATGAGTGTAATACATCAGTAGCTGTTACTAAAATTCGAATTTGATTGTTTATTGGTAAAACAACTCGATTATCAACATCTAATAATCGAAATCCGTTTGTTTCTAATTCATTAGTAGGAATTATATATGAATCAAATTCTAAATTTAAAAAATCAGAATATTCATATCTTCAGTATCACTGATGTCCAATTGATTTTA…
ASTF_00000008	XLOC_000006	645	54	0.504	-1.40196	0.00033467	1	0	0	AATTTGATTAAAATAAAATAATTTAAAATTATTAAATAATAATACAATAGAAATAGATAATAAAGAATATAATAAAAAATAAGTAAATCATAATATTTCATTATTTATTATAGCTAATATTATTCAACCTAAATGATTAATTGAAGAAAAAGCTATTAATTTTCGAATAGAAGTTTGATTTAATCCTCCTAATGAACCAATTAATATACTTAAAATAATTGTAATTATAAAAAAATTATAAATAAAGTTATAAGAAATTAATATTAAAGGTGCAATTTTTTGTCATGTTATCAAAATTAGTCCATTGATTCAAGATAGTCCCTCTATTACTTCTGGAAATCAAAAGTGAAAAGGTGCTGCTCCTCTTTTTAGTAAAAGAGTTGATAAAATTAATATTTC…
ASTF_00000039	XLOC_000021	3285	225	0.5137	-0.504036	0.000370912	2	0	0	TCTTTGAATGACTTAGCTGCTAGGAGTTGTACGAGAAAAAGGGGTGAGAGGCGAGACACTCAGATGATTGGGTGGTCTGAACGAATTTACCACACATGATCGATAGCTCGAAGGAAAACTCGTGAGCGATAAACGAAATGCTACACTGCAAACAGCTTTAGAACGGAATGGAACATTTCTACTATTTTCTTCGCCGGAAAAAAAACTGATCCCGGTGGCCTCCTACCTTTCCCCTTTTTGAGAAGAGAAACAAACACTCACATTTTAGCCAATTATTCCAAACCGTTTGACACTAGGTATCGCGTCTCGATCATCGAACGAGGGTTGTTGTTTTCTAAGCTAGCAAGTACTTCCCACGGAGGTGCTTAAATTCTTTTCTACACCGGATCGCGGAACATC…
ASTF_00000075	XLOC_000042	581	36	0.4707	0.126061	0.0103864	2	0	0	ATAAGCAAGAACGCACGGATCAAGAACATCAGCCTAACAGCGGTTGTCAAAAGTGCAAAAGCAGTGTTCCTTCAAGCAGATCAAAAACCGATCGAACGATCGTTGGTGTGTAAATTGGCGGCTCGTCTGTGAACTGCAGCGCGTCTTAAGGTTTCGTCGCTTGTCGTCGATGCCGTGCCAGCTGCGTTGAGTGAGCGTGTGATATTTCGTTTCGTTCGTTCGCCCTATCCAAGGATGAGCTTTTCGGACCGTGCACCACACGGCGAGTGAGTGATTTCGTGGTTCCATTATTGGATAACACACACTTGTCGTTCGGCCTACCCGGTCCAGTGGACCAGCAACACGCGGGATAGTTTTGTTTCCCCGCCCCCCCGGGGACGTTCTTCCGTTACATCCCTT…
ASTF_00000079	XLOC_000043	830	180	0.8724	-0.171356	0.0421856	1	0	0	GTCCGTTTGATGTTAAAAATCGTGCGCCAGAGCATCTTCTAATCCTAGCCAGTAAGCAAGCAAAGGTTGACTCTCACGCGTGGTGTTTTGGGGGGCGAAGAATAGATGGATACAAGCTTTACCTCGTTTCACTCCTGCGAAAAGAAGAAAAAAAAACACACACACACGCGCGTGACTCCATTTCCTACATCTTTTCTTCTGACGGGATCTCTGACTCCCAAGCAGGCAAGCAGGCAAGCGAAGCAGAACAGAAACACTTCCATCACCATCACACATTTATTGTGATCACAGTATGGTTCAGCGCTGGTAGCGGCCATGTTTCTGTACTACATTTCTGCAAAAACAACCCCAAATTATTTGTAAAAGCTGCCGGGTGAGGGGGGGGAAGGAGAGAGTAGA…
ASTF_00000162	XLOC_000077	1425	315	0.4752	-0.56133	0.00782111	1	0	0	GCACTATACTTTTGCAAGCACGTCATACGAAACAAATCGAAAGTGTGTTGTGCATATGTATTATACACTTGTTTCATGCCTGTTTCATCCAGTCGCAACTGTGTACAGCAATGGTAAGAATGGTTCCGAGAATCACGAACGAGCACTTTAAAAAAGTAGCGATTTTACACAGGATCATTCAGCTGCCAACATGATCAAACGTTTGTTTCGTAAGTACAACAAGATGAGTGTAACCAAAAATTAACCAAAAACCCAGCTACAAAAAGCCTTCCCAACATATCACTTGCTGCTGAAACAATCCAGTGATATGACACCGCTTTTTTTGTTTGGATGATTCATAAAACTCTGTCCCCTACTTCAAATTTGTCTGATCAACGTCTTTTTAAGTGATTTGCTACT…
ASTF_00000231	XLOC_000109	442	135	0.8852	0.229772	0.118287	1	0	0	CTTCGTTTGTTTCCTAATGTAAAAGTATGCACCAAAGCTTGATTTTCTCCACTACACTGATCTAACGCTGCCTAAGAGAGTACGCGTTCGCAAAGCTACAGCCACTACACTGATTATAGACAAGAAAACCGAAACCACCACCCCGCTCGTATTCGCGTATCTTATCGGGCTCTCGGGCTGATGCGTGGGGGGGGGGGGGGGGGGGGATGATAGCAAGGGTGGCAAGGGGTTTTTTTTAATCACGCTGAAAAATGTCAATCGCCACAGGAAATGTCATCGACAAGTGTGGCTCGCTCATTACCATTGCACTGGGATCGCGTTTGGGCGATACGATGCCCACATGTCACACATACGTGTGGAACAGCGCACTGAGCCGGATACCGTAGAACTGCACTTGCA…
ASTF_00000344	XLOC_000169	1783	228	0.8082	-0.0834962	0.018548	1	0	0	AGTGACAACCGCTCAATAAAGCAAAGTGTTAATGTGGAAGCTTCAAGAACGGTGCAGTAATAGCGGGGGCAGCAGTGCGTCTGCTCTCGATCGTCATCGGCGGCGGTAGTGGTGGTGGTGGTTGTGAAAAAAGTCCCGTGTCCTTCCGCTAGGGGAGGGGCGGAGGAGAAAGCTGCGAACATCGCCACGATCCAGCTGTGTGTTTGGTGCGTTCACGAGCCTTTATTTCCTGCTGGCTTGCGACATCTGGCATCTGCAGGAATTTTCTGTGGTGTCTGTCCTTCGGGGCCATCTCGAACGAATAATCGTCATCCTCGGTGTCATCGTCATCGAAAACGGGACAGCAGCAGCAGCACGGAACGGTGCCACGACGGGCCCAAAAAAGCTACAACGCATTAT…
ASTF_00000386	XLOC_000193	543	141	0.7981	-0.0999679	0.0417604	4	0	0	GATGATACGCGAGTGAAGCTGCGGATCGACACCAAATTGTTGGCTAGTGTTGTAGTTGACCGGTAAAAATAGCGACATTCGAAGCAGACGCGCGGTACCGGTTCATGGTCAACTAGATCCAGGGTGTAAGGGCAGCTTTTCAGATTTACAGATTTTCATAGCTATTTTCCGTCAATCAAAGTGTGCGTCTTGTGAACAGTGTGTTGTGGAGCAGGCACGAGAGCTGATTGGAAAACTTTAGCAAATTTAGCACAAAGTTTATCGCGGACATATCGCAAGGAGTATGGAGAAATAAAAACGAGACATCTTCATGCCTAGTGGCATTCGGTTAGGAAGGCATGCTTGACGTGCGGACCGCTGTTGGTGACTTTCGTCCTTATCGACGTGCTGTTTCCGCAT…
ASTF_00000385	XLOC_000193	558	141	0.7981	-0.0999679	0.0409575	4	0	0	CGTCGTTTTAACGGGATTGTGTTTCGTTTCGTCAGTATTGCCTCCGTTGGTTTGTTGGCTAGTGTTGTAGTTGACCGGTAAAAATAGCGACATTCGAAGCAGACGCGCGGTACCGGTTCATGGTCAACTAGATCCAGGGTGTAAGGGCAGCTTTTCAGATTTACAGATTTTCATAGCTATTTTCCGTCAATCAAAGTGTGCGTCTTGTGAACAGTGTGTTGTGGAGCAGGCACGAGAGCTGATTGGAAAACTTTAGCAAATTTAGCACAAAGTTTATCGCGGACATATCGCAAGGAGTATGGAGAAATAAAAACGAGACATCTTCATGCCTAGTGGCATTCGGTTAGGAAGGCATGCTTGACGTGCGGACCGCTGTTGGTGACTTTCGTCCTTATCGAC…
ASTF_00000398	XLOC_000197	235	30	0.7875	0.218897	0.0485376	2	0	0	GGAGCTGAAGAAAAACCATTCGTTGGTTCGGAAAAACACTGTGCGAAACCGTGCTTGTGCTCGTGGGTCTAACGTTTGTGCCAGTTTTCAGTGTAATTTCTTCAATTCTCGCGCTCACCTGCCGGATGGTAGGTCACAGCAACAACTTCAGAAGCCGCCGTCACTATTGCCTTGCATTGGCTCGAGTAGAAAGTGTTCCGAACAGTGTTCACAGTGCTTCAAAGTGAGTGAAGAG
ASTF_00000462	XLOC_000240	3547	312	0.6605	-0.101295	0.00225775	2	0	0	ATTTATTTCGTTCTATTGGAATTATTAAGTTGTCCTGTAACTTCAAATCTTATGTAGATTCATTTATACAAAGTGAAGATCTCAGTAAAGTTGTTGAATGTGTTAAAGTTCAAACGGGGTCCCTTTTAAAGCTCTTACTTGCCTTTCGCTACGTTTATCTGTTTATTTCTCAGGGATGTCAACGTAAAGGGATGTCTTGTTGCCTTGAATATCCACGCAATAGTTTGATCACATTTTATACGTCAATAGCAATTTCTTTACATATCTCTCAATGCATACCCTGAAGGGCTTATGGAAAATTCTCGAAACATTAAACAACTTTCAAAATAATTCTCGTTTCTGTTGCATACGCCATGTTATCTGGAGCTCCTGCTTACGTCCGTACCTTTCCTTACACGT…
ASTF_00000485	XLOC_000253	1193	372	0.8818	0.0166264	0.191282	2	0	0	CAAAACATTCCCAGAAGGACAGGTATCGAGTACAGTCACGGTTCCGTGCAGCGCTCCTCGCTGTTCGGAAGGTTGCATTCCGATTCTTTCTGCAACGGCAGCAGCAGCAACTACCAGCCAAAATCTTCTCTTCAATGCATAATCGAGTGCGTATCCGCAAAATCCGCTGATTGAATTTGACGGTGTCCACGGCGGAACGCAACGGAATGCTGGGTGTGTGCTGCGCGCGTGTGTTTGTGAACGTGTTCCGCCGGAGTATGGTGCAAAGTGCGGCTGCCCGAATCACACGTCTGGAAGCTGTGGATGGATGTCAACTGAAAAAAATGGAAATGATACCCCAACGAGCAGCTAGCTAGCACAGCCCCACACGACTGACCGTACGTACGTGACAGACAACTG…
ASTF_00000483	XLOC_000253	1189	426	0.5589	0.0792824	0.144795	3	0	0	CAAAACATTCCCAGAAGGACAGGTATCGAGTACAGTCACGGTTCCGTGCAGCGCTCCTCGCTGTTCGGAAGGTTGCATTCCGATTCTTTCTGCAACGGCAGCAGCAGCAACTACCAGCCAAAATCTTCTCTTCAATGCATAATCGAGTGCGTATCCGCAAAATCCGCTGATTGAATTTGACGGTGTCCACGGCGGAACGCAACGGAATGCTGGGTGTGTGCTGCGCGCGTGTGTTTGTGAACGTGTTCCGCCGGAGTATGGTGCAAAGTGCGGCTGCCCGAATCACACGTCTGGAAGCTGTGGATGGATGTCAACTGAAAAAAATGGAAATGATACCCCAACGAGCAGCTAGCTAGCACAGCCCCACACGACTGACCGTACGTACGTGACAGACAACTG…
ASTF_00000484	XLOC_000253	1104	312	0.739	0.00521304	0.0906159	2	0	0	GTACAGTCACGGTTCCGTGCAGCGCTCCTCGCTGTTCGGAAGGTTGCATTCCGATTCTTTCTGCAACGGCAGCAGCAGCAACTACCAGCCAAAATCTTCTCTTCAATGCATAATCGAGTGCGTATCCGCAAAATCCGCTGATTGAATTTGACGGTGTCCACGGCGGAACGCAACGGAATGCTGGCTGCCCGAATCACACGTCTGGAAGCTGTGGATGGATGTCAACTGAAAAAAATGGAAATGATACCCCAACGAGCAGCTAGCTAGCACAGCCCCACACGACTGACCGTACGTACGTGACAGACAACTGGCGCTAGGGGTGGTTAGATCGTCGTCCTGGTTTGCTGCAGCAGCGCACAATCGTGCTCGTTGTGAAACGGCAGCACCGCTATTATCAAC…
ASTF_00000509	XLOC_000263	690	183	1.0204	-0.470112	0.0402414	2	0	0	GTGTCATTTGTGCTAGCGAACGTACCACTCGAGTGGCATCGGGATTCGCTGAACTCGATATTCGTCCCAACCCCGTTGATTGATTTGTGAGGTTAGCTTCGCCCCAAAAACCTAACCACCGCTTACTTAAGCATCGCAGTCGGCGTGAGATCCCTGCCGCCCCCGGAAAGCTTAACGCATCGTGAAAATGAGAAAATCGTTGCTAGCAGTGACAGTGCTGATACTTTTGGTGCCAGTTCGTGCCACTCCCGGACGCCCTGTGTACGGTGCACCGGTGTACGTCGGTGGTGGCGTTCGGCCAGTTATTGCACGGCCGGGTACTTATCGGGCGCCTGTTATATACCGACCACCGGTTGTGGTGCAGAAAGTAATTCAACCAGTGATTATTGCTCGTCCCGG…
ASTF_00000508	XLOC_000263	697	183	1.0204	-0.470112	0.039878	2	0	0	GTGTCATTTGTGCTAGCGAACGTACCACTCGAGTGGCATCGGGATTCGCTGAACTCGATATTCGTCCCAACCCCGTTGATTGATTTGTGAGGTTAGCTTCGCCCCAAAAACCTAACCACCGCTTACTTAAGCATCGCAGTCGGCGTGAGATCCCTGCCGCCCCCGGAAAGCTTAACGCATCGTGAAAATGAGAAAATCGTTGCTAGCAGTGACAGTGCTGATACTTTTGGTGCCAGTTCGTGCCACTCCCGGACGCCCTGTGTACGGTGCACCGGTGTACGTCGGTGGTGGCGTTCGGCCAGTTATTGCACGGCCGGGGTGAGTGTACTTATCGGGCGCCTGTTATATACCGACCACCGGTTGTGGTGCAGAAAGTAATTCAACCAGTGATTATTGCTC…
ASTF_00000541	XLOC_000272	446	354	0.4756	-0.0900325	0.113089	1	0	0	AGACGCACGCGGTTAAGTTTCCTCTGTAGCCCCGCTCCGTGGGGAAAGATTTTCCACAGCAACCGCGCGTGCGTATGCCTGTCCGGGCTGTGTACAACTCCGACGGTCGAATAGTTTCGTTGCGACGAGTGCAGTGTGCATGTGGTGCGGTGTATCGTGCTCGCTTGCCTGTCGTCCGCTTGGTAAAAGGTGCACTTTCCATATGTGAAATGTGAAACTCCATGTGTTGCGTTTTTGGCAGGCAGTGAAGATAAACCGTCCAGCAAGGAGACGCAGCAGACGGAGAAGCAAACAAGAAAAAAGAGGGAAGCAAAGCATTTCGGAAGAAGAAGTTGTGGAAAAATGCAAACCACATACACCGTTCAAAGTACAGCAGTGTTTCTGTAGTGCAGTGTGTGA…
ASTF_00000549	XLOC_000275	467	135	0.8852	0.229772	0.114812	2	0	0	GAATTCACTCTAGAACTATAAAGCGTCGCGATAGTTTGACCGATTTTAACCATTTCGCGGTGTACATGTGCAAGTGCAGTTCTACGGTATCCGGCTCAGTGCGCTGTTCCACACGTATGTGTGACATGTGGGCATCGTATCGCCCAAACGCGATCCCAGTGCAATGGTAATGAGCGAGCCACACTTGTCGATGACATTTCCTGTGGCGATTGACATTTTTCAGCGTGATTAAAAAAAACCCCTTGCCACCCTTGCTATCATCCCCCCCCCCCCCCCCCCCCACGCATCAGCCCGAGAGCCCGATAAGATACGCGAATACGAGCGGGGTGGTGGTTTCGGTTTTCTTGTCTATAATCAGTGTAGTGGCTGTAGCTTTGCGAACGCGTACTCTCTTAGGCA…
ASTF_00000554	XLOC_000279	3997	276	0.4528	-0.562423	0.000161676	2	0	0	TTTTTCCATCACCACCACCGACCGTGTTATGACACCACACATTGCACAGATCTCCCTAGCTGCCAACTACCACGATACACACAGAGCCTTACACTAAGACGAAGCAGATGCTCGCGAGTTCAAGATCCACCCCTCCCATTATACCTTCAACGTACTTATAAGGGCGGGGCGCGCAATGTGTTGTTACTATGATCATTGTTTTTTAAAACGCGCACACTACTTCACACAGTTTAGTGTCATAATTTTGAGGCAAGCACCTAATCGTGTAGCAAATTTTGATCCCAACCCCAACTTCCTTACACGCGCACCGTTTAAATGTTCGATGGGGGGGGGCTGGAAGAAGAGGAGAGGTCTTTGTTGTTTTTATTGTTGTTAAAAGCCTATGTAACGAATCCCCCC…
ASTF_00000603	XLOC_000302	1362	288	0.5794	-0.147771	0.0239839	1	0	0	AGTTGCACTATTATTGTACTCTGTAAATTGTAGGGAAATGTATAAGATTACACTGCACAACGGTAAGCAGGGGATAGAACTCCTTAAATCAAGAGCACCATAACAAAAGAAACGAGCGTTTTGGAGCTTTTCCTTTGTGGTGTTTCCATAGCGGTGTAGGATTAGTGCACTCTTTTACGGAACGCTGGCGGAACACAGTGGCGGTTGCAACGGCGCGTGCAATGACGCACAATCTCGGGGAGCGTTTGAGATATCCACGTAAGGTAGGCTTTGTCCGTGACTGGGGCAGAGGTAGACGGATGGAACGGTCTGAACACAATTTTCGCGATTTCACTCCGTGACCTCCTCGGTTTGGTTCCTCCGAGGGTGAAGGCATTGGGGTCGCACTATAATTTGCAC…
ASTF_00000608	XLOC_000306	1021	105	0.8387	-0.491731	0.00737047	1	0	0	ATTTATGTATTTTTGAAAGTTTCACCGCTTCCCTCGGGGTGGTGGTGTGACTAGTCCGCCGTTTTTGGGGAGCAGATATTTATCACTTACGCACGACGTTCACGTTCCACCCCCCGGTGATGAGGGGATAGCATTTGGAGGGACAGTCGTGAAGTTGTGAACCGTTGGCAGCGGGTGGAGTAGTGTCTTTTGATGAGATCTCAGTAAATCCGAACCAAGTCGCTGCTTGCTATGATGGTCGGCCGTACTAAAATAGATTCGAAAAATGGGTCGTGCGCCGTAGATTGACTTGCTTGCTCGCTGATGCAGAACACGACCACGATCTACATGTACCGCGGGGCGTACGTACGGGAGAGTTTTTGCACGGCTTTCCTGGCAGTTATGCGGTCCGGTCGTGGC…
ASTF_00000612	XLOC_000310	492	270	0.7657	0.0356033	0.154527	1	0	0	AGCTTTCCAACATTCTACGGAACCGGTATTTATCAACGCATCCGTGGCACTCCGAGATGATGCTCCAGGACTATCACGCGGTACGTCCACACGTGCGTGTGTGTGCGTGCGAGTTTGTATGCGCATGCATAGTTGCCTTGCCCAAAAGCACACAAACAAAACATTCCTCTTGCCGTTCCAACTGCATTTGGGTAATATACAGGGTAACAGTTCCACTTCTAGCCGAGGGGGAAAATCCCGCACGGATGACTGTTCAGGACACTTGAAACTTTCGTTCCGTTTCAGCCCTATCCGGCTTTCGGCACACTTCGTCAGCATTACACCACCAAACCGCCGTCCACACTCGCCGTCGCCCACCAGCTCCGGCCCTCGACCGCGGGCTCGCTAGCAAGCAGACAT…
ASTF_00000615	XLOC_000313	427	132	0.9466	0.146781	0.116304	1	0	0	TGTGTTTTTCTGTAGGCGCCGTTCTTCCGACACATTTGACATTTGGTCCCTTGCGTGTGTAACCCATTTGTGGGTCTGACATCTTGCAGAAAATACCGGTTTGCTAAAACACCTTTCCCCCTTACCGAATGCCGCGAGGTCGTTGCATTCACCTTCGAGACGGCGACGTGTTGTGTAAAATCTGCATCCCATCCCAGCAGCAGCAGCACTGCATCGGATATGTCACGAGACACCTCGTTCGCTGCCGAACCGCCCAGTGAATTTCAGCGGCAAAGGTGGTGAAGAGAAGCAGTGAAAAGAAAACAACAACGGAAGGGAAACGACCCACACAGAGTCAGCGATATTTTTAAGCCCGGTTGCTGCTACCTACTGCACACATAACCACCGAGAAGAACGGCC…
ASTF_00000616	XLOC_000314	784	129	0.8926	-0.288385	0.023474	1	0	0	ACCAATTACCGCTTTCGAAAGGTATTTATTAATTTTCTTCTGTTGAGTTTGCACGCGTAAGTCTTATTATCCTATCTGTACATATTGTTTTTTTTCCAGAACACAACACGATCACCACCACCACCACCACCACACTCAGAAAGGCACGCATTATCGCTAGTAGAGAGGTCATTTTCATTACCTACTACACTACTACTATTCATGTTTGTTAAATGGTAGAGAGCAAATGGTAGTAGTGCAAACGCGTAGTATCGCTATGACTAGCGTGAGCGAAGACCCTACGCCGCCTAGACACGCGACAGTATGTCGTTCTAATCCCAACTTTAAAATAATCCCTATCGTTCGCTCGTCCTAGTGGAAAGGTATTTATAGGCACGTCAGAGCAGACTCTATCCAAAA…
ASTF_00000619	XLOC_000317	1347	90	0.8996	-0.901012	0.00190289	1	0	0	GGTCTTTCCACACATTACTTTCATTTGTTTCTTTTGTGTTGCTGTGGTGTGAGTTTGTTGTTGTTATTATTAGTTTAAGTTTGAGTTTAGTTTCATTAAGATTAATTTCCTGTCGGATGTCAAAACCATTTAAATTATTTACTTTTGTTGAATTATTACTCCCCCCTCCCCCCTCCTTTATCGTTCTCTCCTTCATTGTAGCTTAGTTTGATTAGTTTGTTCACCGTTTCTGTTGCTGTTACTCGATTAGTTTCAGTTTGAATGCGTTGCTTCTAAGAATCAATTGTTTTGTTGGTATTGTTTACTCTTTTATTTTCTTAAACTTTTTATCCTTTCTAGAGTGTTAGTGTTTCTTGTGTGTTTTTTTTGGTCGATGAAAATTCATCCGTTTTCCTCCCA…
ASTF_00000620	XLOC_000318	838	192	0.6743	-0.334049	0.0179015	1	0	0	GCTGCGCATTACAAACGGCAGGACGCATCCATCGGGAGAGTGCACGAACGATTGTATAGCATTTGGGCGTTTGCAGGACCTGACGACATTTGGTAAGCAGCGAGCTATCTTATGCAGCAAACAAGGCACTGTGGAATTATTTTTTCCTATATCGATCTCTTAGTCGTTTTATTTGCATTTTTGTTTTCTTACTAACCCATTACTCACTTTCCGTTCTCGCGTTCCGTTCTAGCTAGCCTGTCTTCCAGGATTCGTCCGTTCGATGCCTGTGGAGCTCTACAGGGGCTACCTGATACAACAGCCGATAATCCTTTGTTCCTTATTCATTGCAATTTATGTTTCCTAACCTATCATCACCTGGTATTGGCCGTTTGCCTGGATGTTGCCTGATGACAGGCA…
ASTF_00000621	XLOC_000319	444	93	0.6693	-0.0278152	0.025624	1	0	0	GAATCGGTGAAAGTTGTGACGAATTTTTTGAAGGCAAGCACGTGCCAAAAAGTTGTGTTTGATGTTTGAAAAATTAACTTATCATAGGACCAAACGAGAGAGAAAATCAAGGGGACCAACCAATTGCATTGGGTAGCAGACAATTTTGGGGAAACATCAAGGATCAAACCCATCGCATTGGTTAATCCGTATCCGCTGGGAAAAAAAACTCTTGCCCAGTTCCAGACTAGTTCCAGGAACGTCCCTCAACCTGCCTTCAACAAACTCGTCTAATGGTTTCGAGCGAAATAATCAAGTCTTGGGGAGGGCTTTTCCCGAGCCGAGTGTTTGCCGTTGTCTAATTGGCCTAAATGCCTAAACCATTAGCGGATAGGATTGATGAAGCTGAAAGCTGGTGTC…
ASTF_00000622	XLOC_000320	417	192	0.5287	-0.0186065	0.0420865	1	0	0	ATCGAGAGAGCTGCTTGTACGGACGGTAACAACAATCGAATAAACACTATTCTGAAGCACTGTTTGCACTGTATTGCACCATTACCACGCACAGGTGCACTTCATTATGGACGCTTGATTTCACTGCAAGCGTGGGATTCTTCTAGGGGAACTCTTAAACTCCACCAGAACACACTTACACGTACGCTTGCTCACAACCTTAGCGATAATCACACCGTTCGGTGATGATGAATAGCACTGCATCAGGTTGCTGTGTGCAGTGCAGGTGCGACAGGCATCGTACCCAGCTGTTATGGCTTTTTTCACCTCAACCGTGTCACGAAAGGGTCACGCAAAAGGGTCAGCAAAAACTGGTCACCGCATCATCAATCGCTTCCGCTGACAGCACGGAACATACGC…
ASTF_00000623	XLOC_000321	300	72	0.7354	-0.268711	0.0179471	1	0	0	TTGCTACCTTCGGTTTCGGGAAGGCGTCCAACCGTCTGCTGGTTTATCTGCAGTCCGCAGAGTGTATTTGGTGTACGGGTACGAGAGAGCGAGAGAGCTGTCCTGGGAGAGCAAGAGCGAACGACACGTCTATGGACCACAACCGAATGCCTTAGATGTTAGGCTCGGGTCGCCCTTGGGTCACCGCCATAGTTAGCAGACACGTTTTCACGCATGGTGTACGGTAGCACAGGTTATACACCGGAACCGCCGTTCCGGCTGACGATCGCAAAATCGATTTGACACGATTGTCGGCGTAAA
ASTF_00000628	XLOC_000326	3988	336	0.6233	-0.534104	0.000495145	1	0	0	GCTGCATTCTCATTCAGTGTTATTGTTATTATTATTCTTTTGTTTCATAATAATTATTATTTCATAGTCATTTGTTTAATTAATTACTATTTATTGGCTAATAAATTTGCTTCGTTCTTTCTTTTTTTCTTTCTGTAGTCCAATGTGTGTGTGTGTTTGTTTTGTATGTTTAGAGTTGTCGGGGGTTTATTCGTACTATTGTATGTGCAATGTAAACTTAATTTAGTTCATTAACCTTTTGCCTCTTTCGCATTATTTGTTTTTGTTTTACCACGTTTTCGCAGTTTTTCGCAGACAGAATCAAAAGGGGTTTGAACTTAAACTGGAAGAAAGCGCGGTTGGACGAACTGCGGTTCTGTGGTAACAGTGCTTGTCACAAGCCTAAAAACTGTTAACCAA…
ASTF_00000629	XLOC_000327	1572	285	0.5888	-0.428371	0.00944917	1	0	0	GCACACAATTTAATACACCTTATCAATAAATTTAATTATGATCGCAAAATGTGGGTCAACTAATTACGGTTCCTTTAGCGGTATTGATAATTGCTTACAGTTCTCTACTCAGTAACCGGCAAGAAAAAGGTACGAGATTGTGTAATATACGCCCAACCCGCCTCCCCACAATCGTTAGTAGTAGTAGTAATGTGAAGTAGTACAAAAATATATATTTATTTGCTCTCTCAGTGCGCCGAGCCGAGAGATCGTGCAGGGTTCGACACGTGTACGACGACGGCAAACGGGATTTTTTGTTTCGCTGATGAATTATGTTGCGAAATAACGCGCATCGAATCTTGCTGATCGGGCTGTTGATATATAACTGGCATTCGAGTCTCTCTAGCGCTTGTATCGTTT…
ASTF_00000633	XLOC_000331	356	96	0.7724	-0.613495	0.0102393	1	0	0	TGTCTTTTAGACGTGATCCACCAAAAAAAGCAGAAGAAGACAGGTACTATTGCCTTACATTATCCTGCGAGAATGAACCTACCAGCTTACAAGAATTTTAATAGAATAATACAACCAAATGATATACCAAGAGAAGTAAAAAGGAGCAGTCAGCAAAACATTCCTTAATTAAGAATATTACTTATAATGTTACACAAACCACCAATGTTTCATATGTTTCATAAATATATTCTCTTCATAATTTTCCACCAACATTTCACTACACACTTAAAATAAATAAATAAAAATAAACTTCACTACACAAAAATTTGACACATTTTCGCCGTCGCCGCAGCCAGTGTGCCGGGGTGGGTGGT
ASTF_00000634	XLOC_000332	615	303	0.8029	-0.0324131	0.164714	1	0	0	CACGACGATCTCACCTACCCCAGCCCCGGAAAAGCACACGACAGACCGCAACACGAAAGCGCTGCTCTTGGTCCCTCACTGGTCAGATGATCACTTCAATCACGGCGGCGGTACCCGTCAGATACCGCCCGGCTACGGGGTATCCTCGCGGGATTCTCCAGTCTGCCTGCCTGCCTGCCTGCAATCGCCGAAATTGATGCTCCTTCCGATGATCGGGGTGAGCGATTGGAAGCGCTTCTTCTGCCACTGCTGCTGAAGACGAGAAGAAAGAGATTCCAAAAGAAAGCTACCTGTCTGGACCACGAATGGAATGGAACACACACAACAGGACACCGACTGGTTTTATCTCTCGCGCCTCGTCACACACAAGCACCCTCTCTCGCCCAGCATTGCATTGCC…
ASTF_00000635	XLOC_000333	492	228	0.9207	-0.0618877	0.13726	1	0	0	GAGAAGGAAGGGATGTGGTTCATGTTTGTCGTCTGTCCCCTCCTGTATGTGCGAGTGTGTGTGGGTTACCCCTTCTTCTATTCTGCCGACGATTTCTACTTGGTTTCAGCAGCTCAGACCACGTCGTCCGCCGAGTGGCACCGACTTTAACCGGACTCTGGACACTACTTACTTACAGATGTTGTTTCCATCGTTTGCGTCGACTTTCCCTTGGTGCTGCCCTTTACTACTCTTCACTGCATCGATCACCACCACCACCACCATCGTAGAGTAAACATCCGGCATTGGCGTTCCAAGCGTGAACACAGTATATCCCGCTCTAAATAAGCTAATACTGCCACCGCTACAACTAACATCCACCACTCTGGCATTCCTCGATGAGCGATAGGGGGAAAAGAA…
ASTF_00000636	XLOC_000334	716	114	0.6419	0.0727778	0.025	1	0	0	CTGTAAGCGTGTTATAATTTGCTTACTCGAAACGGCCTTTTCCGCGTGACCTGCACACAAGGAGCGTGGTGCACAGAGTGGGAAGGTCATCGCGAGATATGGACAGGCCTCGATTAGAAGAGTCGCCCCCGGGGAGATTCACGCGTCTGGCGCCAATTGCCTCACGACGTCGCGTTACGCCCTCTGACACTGTTTGGGCGAACGTGCCGTGAAATCATCGCACCACAATAGTATTCAACCCACTCTTCTCCCACTCGCTCTCTCGCAACACAGCTGCCTACTCACACACCACCATTCCAAACATTGTTTCACGATGGCAAATACTTCAAAAACACACTGGGAGACTTGAAAATAGCTGGCTCACGCTCCTCTGCACGCTACACTACTGGTGCACACCAT…
ASTF_00000637	XLOC_000335	456	36	0.9248	-0.538321	0.00992137	1	0	0	GTGCCGGCAGATGTTTAATCGTGTGTTGATAGCCGCAACGATCTGATCGTTTCCTAGCGAGCGAACTTCCTTCGCAGAGCTTGTGTTCCCGGGATTTTGTGGATAAACCAAAAAAGGGACAGCGGCACTGCCTAATCGCCCCACCCCCCCTCTAAGGACTAGTGCTGGTACCGCGCAGGGAAGCAGCAAAGGTAGTGGTGATAGAAAGTTCGCCAAAGCAAGCCAGCCAAAACGGGGGCAAGTTGTTAGTTTTCCGGGAAAGTATCATTCGTTCTGCCTCCCGTCCGGGTTCCGGTGACTGAGTGACCTAATAGCTTGTGCCGGCTAAAGTGTGCGTTAATTAGGCGGCATTAAAACAGTTTTCGGGTGGTGGTAGCTCGTGTCAGTAACACGTGCCCT…
ASTF_00000643	XLOC_000341	560	141	0.6077	-0.570714	0.00784559	1	0	0	CACACACGCACGAGACACGAGTATAGTAGTAAAATATACATAAAATGTCGATCAAACGCTGTGTTTGTTTCGTTCGTTTAAGTCTGGTTTGTTTTAAAAACATCAATCAAAAAAAGCCACACGCCCTCCTTTCGCTACTTTTACCATTTCCTTTGTTCTATATGTTGAAATTTATGGAGGAATAAAATGGTACTACTATTAAAACAAGAGTAAATTTAAAAAACACTTTTTGCAAACTTCTGTGCACTGTTTTTCTCGGGGTGTGTTGTGTGAATCGAGTGCAATGATTTTTTTTTTGTTCTAAATTAAGGTAATTTTGTTTACACTTTTGTCTAATAAAATAAGTTCAAACACAATCGAAAAGGAGCATTACTCATGCTTGCCTCATAATGTGTTAGT…
ASTF_00000644	XLOC_000342	552	105	0.6866	-0.416113	0.0105032	1	0	0	ACAGCCAATATTCCAATGATATCTACCCTAAAAGAACATGCAACCACGTGACCGGTAAAAGGCTCGAGAAGCCCCCCCCCTGACAAAATTTGTAAAAACTGTAAGATTTACGCCTGAATGTATGCAATCCGCAGTACACGTTGCGAAAGCTTCACAGTGCACTTTCAGTGTGGTCAAAAATGGTTGAATAAAGTCGAATGAAATATTGCTTATTGTTCGATCAAACCCCCCACCCCCCTATCCTGACCATTTATATTGGCTTACAGGAGCTACGTAATAATTTTTGGTCACGCAGGGAGTGATCAATCAGGCTTACAACATACACGGTGTTCCCAGACTGTAACGGAACATTGGTTCGATGGATACTTTTTACCGGGCATAGATATTCAGAAAAGGAGG…
ASTF_00000645	XLOC_000343	268	207	0.7531	-0.44531	0.0418692	1	0	0	ATGCCTAAACCAAAGTGATGTTTGGCCGAACTTTGTCTGTTGTGTATTAAACTTCACTAATGTGTTTGGTGGTACAACCACGTCCACCCGGTTCCAAAAACATTCAAATCTATACACCACACATCCTTAAATTTTTTCTTAAATTTCACATTAATTTGATATATCTCCGAACAGCCGAACTAACACAACCACAGGTTACAAAGTATCGACACCTAAAGTTTGCACAGCTCGTACAACATCACAGCGGTATTCACATTCCTGGTTCAAA
ASTF_00000646	XLOC_000344	592	222	0.7594	-0.109461	0.0677833	1	0	0	CTAAGCTAGTAACGACACCACTCAATCACTTCCCAATTCGCCGAGCCGCATATCCGTAAGTGCTAGCGAAAGTCGAGCGATCACCTTGTACCGAGCGCAATGCCGGTCGCAGTCAGTGATAAATTTTTCCCTATCTTTACCGCTTCACTCGATCAATGAAGTGCTAGCGAGTACATTCCGAGATGAATGGTACAATTTGCCAAACAAAACTGCGTGATGCTTGAAATGGGAAGAGGCACCACCACCGGACAGACAGTCCGACACACACATACTTTTCACAGCTCATCACCACCAGGCGACTCCATCGGGCAGAACGGATGGCACACCGCTTTGACAATGAATCACACCACACACTGGCCGGAAACAGTAATTGGTGCCGTAGGAACAGCGCGTAGAAAA…
ASTF_00000647	XLOC_000345	6817	483	0.5171	-1.0409	8.74613e-06	1	0	0	TTTTCAATGTTTTATTCATATAATCTTCCTGCAAACCGAGAACTTGACATCGATAGTTAGCACACTGAGCGGTGCTTTTGTTAAGTCTAACATTTTTTTATACTTCTTATTAATGTAGTTGTTTGCTTCTGTGTTCAAAGCCATCATCATGTCTGTCCCTTTTTTTTCCACACGCTACCCATCATGTACCAGATAGATGTTCGCAATGGTATGTGTGTGTGTTTTTTTTTGTTGCTTCTTTTTGCTTTTTTCGACTGATGTTCGAGGATTCGAAGGCTTTTCTTTTGCCTTTGGTTTTAGTAGTGTAGATGGTTTTACTTTTCCATTTTGCATGACAGTGAACAGTGTTTCCCATCTGCATGCGCAAGAGCTTTCATTTAGTGGTGTGTGTTTTTGTTT…
ASTF_00000648	XLOC_000346	1008	234	0.7637	-0.0903813	0.0465875	1	0	0	TTGTCTAGAACTTTTTTGCGTGCTCTTGTTTACGAGGACATTGGAAAGCCTGTAAAAAGGGCCCTCTTGCCTGACAGCTTCTACGGAATATGTGCGTTTTATTGTACTGTTTTTGTTTTCACTTCTCGGCCTACTCGGTTTCCGCTGGATTTCTTCTTCTCTCGTTCAGAAGGTTCTATCTGCTACATACGCACACAAGTTCGCACCTCTTTTCCTCGTTCCCGTCATTCGCACACGACACACACAACAAAAACACAACGTAACACACAAGAAGCTCACGCAAAAACACCGCACAAACAAATGGGGTGCATATACAATTTTATGCCGGGGTATACGAGAATATTCTTGCCGTGCACAACTTCTAACTGATTCGCGGAACCAAACCGTACACCCGATTGG…
ASTF_00000649	XLOC_000347	417	153	0.9938	-0.233485	0.0699251	1	0	0	TGCCACTGATTGCTTTCGCACTCCACGGTACGGTTATGAGGCAGTCTTCCTCGAAGATACTCGCAGTCGTCGTCGTCGTCGTCTTCGCAGCAACCGTTTGTTTCAACTCCATTAAAAAGAATTAGTCGCACGCACAACCGGCTGCCTAAATACACGACCTCTGCCACCTTTCAACTTCGATGGACAACGCGCTTTTCCGAGAGCTGTTCACTTTTCACACAACATTGGTAGACACACACACGCTCGCAACCACACAACTTCTAGCACTTGGAGAAAATGTTGACGGAAAAACTAAAGCCGCGACGAAAGTGAACGCTCGCTTGCCCGTTTGATTCGTTTTCCTCACGTGCTGCTTCCTACTCGTCTCGCACACGCACACGTCTGGCACTCTCTCGCTGC…
ASTF_00000651	XLOC_000349	827	210	1.0996	-0.00180779	0.145237	1	0	0	CGAGTTAGCAACGAGCGTCGGTAATCGCTAAATCAGCATTGGGAGTGTCGTGTTGTATCCAACGCGACGAGTTATGCTGATGCGGCGATCGCTGCTGGGCCGTTTATGGGCCGATAACGGAATCGGCTGAATTCAATAAAATAGTTAATTTCAAGACACCGAACTGTAAAAGACTCTTTCTATCTATTCAGAAAGAAAAGTTTTAACTGGCGCCCGAATAGGGACCTGACAAAAAAATCAGCGGGAAGTGTATAAGTTAAAAAAAATCCTATAAAGTTAGCCATTTAAAAATTGTGGCTAATCTCGTGGTTGAAGGAGCCATCATAATAACGAAGCGAACTTTGGGACACCGTGGTTAATTCCCGATTGCTGCCAGCGAGCCCCCAGTCATCAGAAGGA…
ASTF_00000652	XLOC_000350	733	141	0.8409	-1.11072	0.00348915	1	0	0	TTTTCAGTATTCGTTTCGTGGCTACCTGTACGGCTGGGCATGATTTATTTACGCTTTCCGCTTCTTACCCTATTTCCATGTGTGATTTATTGCCTGTAAAACGATTGGTTTGTTGTTTGGGGGCTTAGTTGTTTCCTTGTGTAGTGATAGAGTATCTAAGTTCGCACATTTAGAATCACATTTATACAGTATTTACAGATGACGAAATGTTGCTTGTACGTTTGCCCATAGTTGGGGATTTTGTGTGTGTTTGTGTGTGTTTTTGTTTTGTATCTCTTATCGTTACGCTATGCCGGATGAGGGTTTTTGTTTGCATAATTTTTAATATTTCAATTACTTGTATATGACTTACCTAGCACAAGTGTTACGCAGCTTCCCGCTGCTTTGTAGTTTTTGTGT…
ASTF_00000654	XLOC_000352	360	27	0.8331	-0.808043	0.00421097	1	0	0	CCGCACACGGCATTCTCGTTAAGCCGCAGTTGCAATAGAGAAGCGAAAACTTCTGGCTCGTGGTGAACGGGCGCTTCGTTTCCGTGAGCTCTGGATAAAACAAAACGGAAGTACAAATAAGTAAAGAATTAAACACAACCGTTTTTGTGTGGCCACCGACACGGTTTATTAGGACCGTGCTGGTACACTGTAGAGCAGTATTAAGTTGACAGCTTGCGCCGTAAGGACATTCACCGACCAGGATCAAACAAGCTCGGGAGCGTAGAGTGTGTGCAGTGCAATCGATTACATTTTGCCGAGTGTCCTTATGTGTAGTGCAGGAGTCAACGTTTGATACTGTCAGCAATACAGCTGACGGAA
ASTF_00000657	XLOC_000354	506	138	0.8974	-0.299477	0.036085	2	0	0	GAGTGTACTTTCTGTACGCGGGTGTCTTTGTGTGTGTATGTTTCTGTTAGTGTGCCTTTGATTTCTACTAGTACTTTCTTTCGGTTTTGTTTGTTTTTTATCAAAATTGGAATCTTTAGTACTCGCCCATCTAGTAGCTTATCGTAACCTTACCGCTCATGCACCGGGTGAGTAGGAAGGTCAGCATCGTAACAACAGTATAGCATCAAAAAACTGGGAAATGTTAGTAATCAACCCATACACGGAGAAACGAAAACACAAGCGGAATATTTTGATTTAGCACGTGCGACACGCGATTGTATCTCTTGACAATAGAAGGCTTGGAAGGTTTTCTTCACTACAACACGGATCGTAAGTCGTGTACAGATGTGCCATCGAATTTCTAGACATTGTGAGCGA…
ASTF_00000688	XLOC_000370	1019	159	0.8781	-0.15513	0.0290864	1	0	0	ACTACTCTCAAAACAAACCGGAACTCTTTCTATGCTGTAAAAAAACTAACCTTAAATTATGAAGGTATCCTACAATGAAAAATAAAAACGGTGGCAACAAACGGAACAAAAACTGAGAAACTATGGGATAGTTTGTGTTACGTACCAGTGTAATAAAAATCGAAAATAACTGCATCTTGTTTCTAGATTTATGTTTGTCCTATAACCAATGAAACTAAAATCACACGTAAATCCCACAACACTACTATCTAACTCGATATTTAAATCAAACCCAAGGGATTAAAGGGAAACCGTAAGCTAAATCGTAATCGTAACCTTGCACTATGCGCCACAAACTAAACACAAATCATCTCTTTACTATTACTACTAAAACTGATAAACAAATGGGCGGTGTAGAGT…
ASTF_00000735	XLOC_000394	705	183	0.6166	-0.129821	0.0267561	1	0	0	TATCTCTTCGATGTGAACTCGTTTTCGCGGGATGTAGTGCGAAAGGAACAAAATGTGTAGGTGTAGTGGAGTTTTTCATGGTCCATTTCTACTATTGACTTTGAAAGCTACACGGTAAAATCATTTAGAGTTTTTTATTCGGATGATAAATATTTTTCTTCAATTGAGTTCTAACAAAATCATTTCATCATTTTTCATTTCGATTTTGTTTTTTTTTATAAAATCGGCTCAGTTACGCTCAGCTTCATCAGCTACGATAGCAAATATCATTCTCATTGAGATAAATTTCAAGAGCTACATGTTTTTGATACTTGTCTAACATTTTACCAAAGAAGTTAAGGTGTTTTAAATATCGTTTGAAGTTTAACTCGTCCGGAACGGCTCTATGGACAGTTTCCA…
ASTF_00000736	XLOC_000395	472	66	0.7432	-0.115826	0.0197975	1	0	0	TTACGTCTGGCATCAGTTAACGTGTACCGAGTGCACGCACCAACACACTGGAGGAATTGGTATTATGCTTACAGCTCGTACATAATCATCATACCCGATATCGTGCTACCCGGAACAGGCGAGTGTAACAAATCTGGCGTTCAACAATCAAAACTGTTTCCCCAAACTTCCTTTCCCTAATGTAGACCCCCGAGTATCGGCAAGCAAAAGCAAAAAGTAAAATCATCCATAGTAACCGAGTTAACCGATGTGCATGTATGTGTGTGTGTCTGTGAGAGAGTAGTAAAGTGAATTGTATCGGCCAGGTTGATTGATGGGTGAGGCTAGGCAACAATGGCGTAGGCGTTGTGAAAATGTCACAACCCTGTGTAGGTGACAAACCGGCTGAACGCATGTGGG…
ASTF_00000743	XLOC_000398	768	216	0.6426	-0.643584	0.0107112	2	0	0	GTCGGAGATGAGTGCGAGATTACTGGAGCTACATGGAGCACACATGACGATGGTCCAACAATAATGAGAATCGAACCAACAAACATCGTTTCAAAACAACCACTCTCCTGTTCATCATCTTTCTCGTCGTTAATCAGCGGCTCCCGATGTAGGCATTATCGATGTTTGATGAATCACGACGAAATTCACATCATGAAGCAGAAAGTAACTAAAATTTTATATCCCTTTTACTTTAGTCCTTTTGGCTTAGTATGTTGTTCCCAGTGTATTTTATTATAAGTCTTTCTCAAACAAATTGCATGACGAAGTTCAATGTGTTATAAATAATGCAACAAGTGCAAGATAAATGGCATTCAAATCAATATTTTTCGATAATGTTTGCCATTCTGACGGTAAGGA…
ASTF_00000744	XLOC_000399	3332	405	0.4282	-0.676975	0.000878813	1	0	0	CTGTATGTAGTGCATCTGTACGTGAATAAATTAGCGTAAAAAACCAACCATATAATGAACACAGCTCGCATTGAATGCTATTTCGCGAGGCGAGGAAATGCTTGCTGTGTAGTGTTAGGAAAATATTGTCTAGTTGGTTTCAAGCTTTTTCTTACACCTATACTAAGAGAACCCTAAGTAGATGTTGGTGGAAAAAAACCCAACTTGCAACTAAACGTAGCGTAACATTGCTTGTGGTGTGGATTGTTTCCAGCTGGTTTGGCTACACACAAATGAGCCCCTTTCGGTTTTCTGCCAAGATCCAGTCATGAAAGGTTTGTGATGAAAAAAAAACAAAACAGAAAAACATAACTGTTGTGTATTTTTTTGCTTGATTTGTTCTGGATCTTTTAACACACT…
ASTF_00000865	XLOC_000462	310	33	0.4653	-0.639927	0.00235914	2	0	0	AAGTTGGCGCTCGCTAACGGCTCGACGTTTTCGCGTGCGTGAGGTGGTTTCGAGTGTGTTTTTCGCGTAATTAAACGGATGCGTTTTGTTCACAACGGGTCGCCTGTTTGACGTGCCGTTGACGTGCTCTGTGTGCGGACGGGTACCGCACGCTATTCCGTGTGACGGTGCGGTGACCGATGGGTCGCCCGCAATCGCGCTAATCGTGCGTGCCAGGGTATGGGAAATGTGTGAGAGTAAATAGCTTCTTAGAAGACAACAACAAGTGAATTGCAAAACCAAGTGAGGAAAAGATCAAGTAAATAAACTG
ASTF_00000898	XLOC_000482	1239	222	1.0719	0.424345	0.214758	1	0	0	CACAATGTCCACAAACAACAGCAAAAAGGGAAGGGTGAAGCAAAATTGAACGGGCAACGCGAAATTCCAGCCTAGCACATTACCTCCAAACTTCGTCGTGCGTGTCACTCGAGTGTTCTCTTGCGCAAAGTAGCCCTCCGCGCGTTCGCAAATTGTCGCAAAGAGTTGTGAATTTTACGGCCAATAGAATCAAAGCACCGACGGCAAAGCATTCACCGCGAAATAAGAAAAGAGAAACCCTGGTCGCGGACATCGGAAACAAAGCAAATCGCGCGACCAGCGGAGTGGGTACAGCTGGAATAATAGCGGAACAGCATCGGGAAAGCAAAAGGTGTTCTCTTCACTGGCGTCTACCTGGGGGATGACGATATTTCAGTGAATGTGAACGAAGGCTTGAAC…
ASTF_00000906	XLOC_000486	1266	318	0.5747	-0.376423	0.0205004	1	0	0	TTCTCGTGTAGGAATTCAAAAGAATGCAATTAGAAACCACCGCCCTTCAAGAGGCCGAACGCGCGTATAGTTGGAGTAGAAGAAGTAGTGCGAGTTTGCTAAACAGGTACCTGGTAGACAGTTCGTTTTGTTGGAACAAGCGTAGTCGCGCGAAAGAAGAGCTACACAAAGAAAGCGGCTTAACAGGCTTTTGTAACACAATTGCATCAATTCAGGCGCATCGAACGCATGGTCGATTCTCTACTATACTACCTCAGCACAATGAAACAATGTACACGTGTGGAACCTACGAGTGTGTGTGTATTCACACTAAAAACAAAAAAACCGAAACTTTTTTTTAAAACAAAGAAATGCATCCTTTTTTGTTCGTAAGAAAGTGAAACTTTATCGCCTTTAATC…
ASTF_00000996	XLOC_000521	1205	252	0.5505	0.00710506	0.0284089	1	0	0	AACGGGAGAATCAACGAATCTCAGGTGTGAATGAGTGTGTGAAGCAGTGAATAAATACAACGACTGATCCGCGAGTTTTATGATCGGTCAGTACATCAGCATCATCAGCATCGTCGTTGGCCCGTTTTCGAAAGTTTCAATCCCACCGCCAGAAGCAACCGGACCGAATACGGTGGTAGGTGTGCGCGTTGAGCTCGTGTCCGAACCAAAACCGTCCGATTTCACCCGGTACCGCGTTTAGAAGTGTAGCAGCGCACCTGCAGCGGCGTACAACTGCAACAGCACCGAATAAGTGCAACGTGTCGTGCGTGTGCCACACACAAGCGCGATCGTGTGTGCCGTGTTGGAACACTGCAACGCTCGGCGATAGAATCAGCGAAAACATCATTTGCACACGGC…
ASTF_00001000	XLOC_000523	444	120	0.6908	-0.0542469	0.0323642	2	0	0	TCGGTCAATCAGTGCGAGAACCAGTGCGCAACGGTTCACATCCGGGTTCCGCAAACAGCATCATCAGCAGCTGCTGCTGGTTGCTGAGCTTGCGTGCAGGTGTAAGAAATCCTAGTGTGTGAATCTGCTCAGTCTGTGTGTGTGTATGTGTGTGTGAGTGCTTTTGTAAATCTCTATGCGTACGTGTGCTTTGCGTGTGAATAAACCGGTGCAATCACAAATGAGTGTCAGTATTGGAAGGACATAGCGAAACCCGCATAGCTATTACACCACTGCGCCGTTTATCGTGGCCCATCCCAGTGTGTGTGTGTGTGTGTGTGAGTGGGTGATGCGAATCCCACCCGAGTGAAAATGTTCACCAGCCGCAGTGTATCGACAGCGTCGCCGGAAGTGAACATC…
ASTF_00001081	XLOC_000556	1656	297	0.8544	0.0180371	0.0568639	3	0	0	CAGAGCAACTTTTACCGCTCGAGATGAGCACGATCCTGAGCGGATCGCGATCTAAAAAATGTATTATTTGTTTGCAGTACGCACCGACCATGGTTCCACTGAACACGGAAGTCGACATTGATGGTGTTACGGTGAACTGTGAAGCTATGTATGCCAAGTTCACAGGCGTTCAGCTCGAAACTGCAACACTCTCAAAAAAGCGATTGCTCAATCTTTGTTTGGCCTGCCTAACGCAGCTAAATTCTTGCTATTTGTTTCAAAAGCAGGCCATTGAAGCAGCGGAAAGAATATTTACAACTTTACCACAATTGGAACTTCATCTAACAGTTGATGGAGATAAGCTCACATGCCAGTACCTTAACCCACAGTTTGAAAAAACGAACGAACAGACTGAAATTA…
ASTF_00001084	XLOC_000558	312	45	0.8563	-0.773778	0.00611194	2	0	0	GCTAGTCGCCGCTGTCATTCGATAAGTTTTTTGGAGAAATCATTAGTGTGTGTGTGCGTTGTTCCTTGGTCTAGCCTCCACGTGTGATGAAATCCAGTGCAATACCCAACCCGTAGAGGCACCGTCAAATGCAAATCGTCAAAACTAGTGTCTGTGTGTGTTATATTCTCTGTGCGTGAGTGTGTACATTAGGCAGATCTGGTGAAAAAAAAATAATTAAAAACGGAAGAATTGTTCAGTAAACGTTAGCAGCTTTATCAAAAGCCACACAGCTGAAAGTGTGTGTGTGTGTGTGTTTTTTTGCTAGGTTTT
ASTF_00001091	XLOC_000563	3907	435	0.5231	-0.616161	0.000808687	2	0	0	GGGGACGAACCTTACGATCATCCCGACGGGGGCGCCATAATGGTGGCCCCAGTTCACCAACCAACCAACCACCACACCCCGAGACACCCTTTAAGCCAGCAACAAGCTCAACGCAACGGTCGAAAGATTCATACTCGATCGGACCGTACAGGATGCGCATATGCAAAGGCTAAAACGATGCATTTATGGCATACCCTTGAGGAATAGGAACTTCCTTCAAAAACACAATCATACCCACCCACCCAAACTATCACACACATGAAATCGAACAAAAAGCACATCTCGAACGCCCACCGCGCCAACGGGTATGTTGGGAAGCATAGATGGATCTACAGTGAAAGGGGAACCAGTAGTAAGTGTGGTGTTGGATCGTGACGTGCAGTAGTTGACGTTGACCAG…
ASTF_00001094	XLOC_000565	4884	438	0.4904	-0.486391	0.000273952	1	0	0	TGTGCTTGTTGCTTAAGAGAAAGATATATAACTAGTATCGAATCAGACGTTTTGTTTCACAAAAAGGGGAATCAATTAGCAATCAATTTGTGCAAAATCCTGCAAAACAAAAATACGTAATACTGACTGACTGTGACACGTTCGCGCTCTTGGAAAAATCAAAAGGAAGAGAGTAGCTAAACAAAAACAAACATCACGAAAAAAAAACATGGGAAAGGGGCAGCAAAGATAGGTTAATTCCTGTAACCATACGTAGCGGTAAGTGGTTGAATACTAAACTGTGGCATTACTAGCGAGCAAAGCGCGAAACAAATATCCTCGCCCTTTCGGATTAGGAGAAAAAGGAATGAGAGAATAGCAAGAGGATGATTACAATTAATCATTGGAATAGAGGAATGC…
ASTF_00001095	XLOC_000566	629	156	0.474	-0.585922	0.00529206	1	0	0	GGTTATTGGAACTAAAATTTTAGATCCCGCTGGTCACCTACGACTAGTCATGCGATGTCGTATTCCGAGCGTCATTTTTAATCTCTCTTTTTCTTTCAGCTTGATCAATCTGTCTGCATTAAATTAAAAAAAAAATGTTTTTTTTAGTCTACCACTCCTTTTCCCATCCTTAACACATTCTTAACAATTTTGTTACAGTATGTTTGATTCTTGGAAAAGTGCTTGGAGAGTGTCAAATACTGAATTTGCCAAATTGTCACGTCACATTATTATTTTCTTATTTAGATGTAGATTTGTTCTTTTTGTTTATATTCATTATTACGTTGCATGCCCTTTTACAACTCTCAATGTGTCTAGATTGTTGCAATTTACTTTCAATCCTCCAATTACCAATCAATT…
ASTF_00001096	XLOC_000567	547	267	0.6564	-0.0325486	0.0920807	1	0	0	ACATTCAGGAAAAAGGTTAACAAACACACAAAGTTTGATAGGAAACCGGGATGTGTACAGTACACTTCGCCGTAACAGAGCAGACTAACCTGCAAGGAAAACTCAGCCAAACACTCCGCACTACGCATCGGTGTGCTGCCTACTTAGTTCGCATTGATGATTGCATTTATGATTTTAACTTTACATTTTTTCTCCAATTCCCTTTATTTTCCCATCCGTCGAGGACGAAATATGTTTCGGATCCTCCAAATGCCTCGCTTGGGATGCCCGAAGGATCAACCGAGTTGAGCGCACAATTGAGTTGCAACGGCCTGGCTGGCGGTAGTAGTAGCAAGCAGGTTGAGCATGCATTTGGTGGGCAGCTGTTGCACAATGCGACTGCAATGAGATGATTAATGA…
ASTF_00001151	XLOC_000593	1007	186	0.6295	0.000539666	0.0258854	2	0	0	CAAAACCCTGCGAGCTCTTCTCTAATCGCAACCGGTTATCGGTACACAAAAGCAAAACCCCAAAAGTAAACCAAAAGACAACCTTCTTTCGTCTTACATCCCCACCCCCGAACAAGGACGAAACGCCACAGGGATTCTTCGAGGATCATGGGCTCGGATAGACAGCGGCCGGTGTCGGTGGAACAAGACGTATCCTTTCGCTAGCCAAAGCTCGCAACGAATTATGATTTACGGTAGTGGAATAGTGGAAGAAGTAATTTTTGTTTGTACCAAACTCTTCTCACAGCTAGTTTGGCAGAGTATTATTTGGGATAATTTCTTTTCAAGTTCATCTCCGCGCATTTAAGTTGATCCTTTCTTGTCGAAAAAAGTTCCCAAGTTCTCAACATATCATTTTAT…
ASTF_00001191	XLOC_000612	1738	258	0.9312	-0.352163	0.0196294	1	0	0	TACGGTCAGAGTATGCTGCTAGCATAACAAGGGGATTTTGCAACAGATCTCTACCGCGGGTAGTCTGCAAACGGTGGAATTTGCTGAACGACATAAACGCCGTGACCTAGTGGAGCAATCATTGTGCGTGTTCTCTTCCACTCGACTAGTTGTATTTTAGTTTTTTTTAGCGGACATGCTGCTGAACGCAGCAATCTTCCACAGTCAATCTTATCCTTGACCGCAGACGGGCAAAAGGAGGTAAAGCAACGAACCGTCAGAGGTCGGTTCCGTTTCACTGAACGGATTACTCATCGCAGCGTTGCGGAGGAGAGCTACGACCGCTCATCGCCCACATACGCGGGGTCGATACAAATTTGGAGCTTGCCGAAAACGGCCACATTCGCTCCGATGGTGAAC…
ASTF_00001192	XLOC_000613	1025	246	0.5785	-0.0302294	0.0339954	1	0	0	TTTTGATTCAAAGTTCTACCTTCAAGTGAGTTTTTTTTCATGGTACAATCATAGCAAGTTAAAGGAAATGAATGTTTTTTTTTGTGAAAAAGTAGGAGCCTGCTGTAACCATTCGTTACACAATTAAAAATTTCAATTGCTTTATTTTGAGTTTTGTATTTAAAAGGTGTTGGTGATCCACAATTACTCGATGATATCGGTACAAAATCGAAAAAAAACTCTCAAGAATACGTTTAAAATTTGAAGAGTGATACTAAACCAAACGCCCTTCACTAGAAATAGAAATCTCTAGGCAGGCTACCAACCAAGGTACCAAGGGCAAGGCCACAATGAAAGATAATTGTTATTGTTTGTAAATGTGCGATTTGTTAAAGCTTTAGCTACACACTGTTTCTTGGA…
ASTF_00001195	XLOC_000616	250	114	0.9903	0.0642012	0.11785	1	0	0	GCTTCATTTAGTCTACCGTTTGGCACATCGCATTTTAGCACACGCAACCGGCCACGAACACTTTAAACACTGCGTAACGCACATCCCACGCGCCTGTGCGCACGCTATTCGGTGATCGTTTGTGACACGTTACGAATGCACACTTTTAGGCGCAACACCTTCACAGCTATCACGCACTGCATCTCCGTTCGAATGTTTGGGCATTATCGCGACGGCAGGGCGGATAGTGGCTGTGAAGATGTAAAAAACC
ASTF_00001196	XLOC_000617	4279	732	0.5885	-0.335158	0.0157597	1	0	0	TTTTATTATAATTTTTGGATTAACAAGGCATTGAGCAACGATGTGAAAAGCAAAGAGCTTGTAAAACAATTTATTTAGATAAGTTACGCATACACGCAAACTGTTGCTAGTGAAACATTTCAAGGCACAAGTACGGCTCGTGGTTGTGCTGTCTGATGCTGTTTTACTGCTGCTGTCGTTGGCCATAATAATTTATAAATGTTAATATTTTTTTCGCCATTACCACTGCATTCGAACTCTCCGTCTACAGACATGCACACACAGGCACGCTCGTCATTACGCTGTGCGCCAATCAGTTCGCGCATCGATGATTCAGCGTGCGCACGTTTAAAATACATTTCAACCCCATCCCATGTGGGGAATTCACCCTCTGGTACGGTGGGTCGGCTACTTCTCTTG…
ASTF_00001197	XLOC_000618	440	129	0.6489	-0.121457	0.0266688	1	0	0	AATACCTGCCAAAAAGGACGAAAACAGAACATACAGTTCATTTGTTTAGTAGATTAAAAATAATGCTGCATTTGACCAATACTAATTTTAGTCCGAACTATCAGTTGCCATCAAATGGTCACTAACCTACCCTCGCTCTAGCTTGCTCGAAAACCTACCCGGATACACACGCACGCCCACATCCATTCCTACCAAAACCATGTGGCGGATATTTTTAGCAAAACTTCTTTTCTCGATGTTTAGTATGGTAGTTGCATTACTGCATTACCCCACCATCTCCCCATTTTCTGCCAAGTGCAAGCCTTGTAGATGAATGTTTGCATCGGACGAAATCTCATAACCTCTGCCGACCTGCAACAGCCGTATGCCGATGTAGGCAAATTAAAAGCAGCGCATTTA…
ASTF_00001198	XLOC_000619	1400	294	0.7327	-0.0357029	0.0483093	1	0	0	ATGTCTCCTTCGATAGATTAATAACGATTATCAATATTCCGCAAATGTTCTCCACAGTTCAGACAAACACGCACACAAGCTTGAGAGAAGTGTTGCGAAGTAAACCGAAGGAGACCTTTCGTCGTCGAGAAAAAAGAAAATCGTTCACCGTGAGAACATTTCCGGAGGTATGCGAGGGGTGTGCATGTGGGGAGGACGTGTGACGTATACGAAAATAAGATCGTCCTCGGCATCGGTGATAGGTCGAAAGTGTCGCGATGAAGATTTGGCACAAACATGCCATTTACGTGCCATACTCGCTGCCCGTGCGCGGCTTGCTGCTGCATTCGACGCTGCAGCACCCATCGCACCACAATCCACCTTGCGTCTAATGCATTAAAACCAACCACCCCGCTGCTG…
ASTF_00001199	XLOC_000620	1620	180	0.5559	-0.188294	0.00562099	1	0	0	ATTTACCACTTTACCCTAGTTTTTCGTATCGTTCCCAAATCGTTTATAAACTTACCTCTCGTTTACTCTTTCGCATAAACAGACACTCATAGCACAATGTAACCCAATCGCATCGAAAAGGGAGGCAACAATATAGCTGCAGCGAGCGTGTCGTTTGCATTGCGCAGCTGAGCTGGGCGCTTATGTGCACTTTCGTGCACTCCGTCCGTGTGCTGCGTCCGTGTCAGCTGGGATGCGGTGCGGAAGACCGCATCAGGTGATGAAATCGATCGATCGAACACTGTTTCACTTGCTCCCATCGGGGCGGTACGGCAGAAATGTGACCCGTGGTGGCTTTCGATTTCAATTAGTACCGAATTTGTTCCTTTACTGCATTTCGCACACACACGCACACGGATT…
ASTF_00001201	XLOC_000622	764	288	0.5483	0.0170128	0.0690315	1	0	0	TTAATGTTGCGAGCGATTGCAAAAGGAGAAGAAATGCATGAGAAAGGTACAGTTTTCATTGCAGTTCATCACAGTTCACAGCTAGAATGTTAGTGTATTTCGGCATGAGGGGGGGCGAACGAAAGATGTGCTGACTGGGGGAAGCTGCTAAAACTGAACTCAGATCTTGTTGACCTTCCTGTGGCCTACTGCGAAGGAAGAGTGGAAGACAAGAACGGTTGCCACGATCATCGGTGGGGTGCAGCATTGATGGCGATGGTGTCTTCGCTCTGCGCAGCATCGCTGGTTTACATCGAGCAAAACCTGCCCGCGGCATGCCATGGGATGTGATCCGACCGTCTGTCACGGGTACCCATCTCGTCCCCACGTAGCGCCTAATGTCGACGAAAAGCAGCATGC…
ASTF_00001204	XLOC_000625	973	108	0.8052	-0.331993	0.0106283	1	0	0	CGGTTGTTGCAAGTATTTATTGTTAGTCGAGAGAGCCTCTGTTTGAGTGAAGATACATGCGATAGCAGGAATCTGTTTTCTACCACAAAAAGGTTTCCATCTTCAATAAATCAGTGTTGGTAAAGAGCTTCCGATGCTGGAGAAGAAAACACGGTCCAGCAAACCACTGAAACGATAGTGGGTATAACAGTGCGCGCTATAGCTTTACCTAGCGAGAGTACAATCGATGCATCTTAAACTCTCTTTCTCTCTCCTTTTCTATTCGAACTGAGTTTTTAACGTAAACACTCAACTTACGACCGTTGCAGATAGATCTTACAGATAGTTCTTAACATAATACTTAAAAGCTTTCGCCCTGTGCAGGAAAAAATAACCACCGCCCTATTCGTAATCTCTCAC…
ASTF_00001205	XLOC_000626	2537	249	0.6455	-0.788499	0.000951535	1	0	0	GAGACTCGTGACTCCTCAGGAATATCGTCCCACGGCATGTTGATCACACGCTTGCCGCCCCATGCGTGATTCGTGGTTCCAGCTCGGGAAAAAGTTCTTGTGTGACACATAAAGTAGGTCCCTGTTTATGACAAATGACCGCCGAGTGATGTAAGTGTAGTGCCCAGTTAGCAGCACTGCAGTGTTAACGCAGTAACGCTAGTAAATCATCGCTGTGGAGTGTGGTGCACGTTGAAAAGGCTCATTGCGGTTGTGGGAAGGGAAATACGAGCTTCCCTTCTGCCGGCAAATGAGTGTGGGACGTTCATGGCTGCTTGAAGGTTGTTGGCGATTTTTAGCAGGTATCACCTTGAAGCTAATGTGCAATGACTTGTTATGGGTTTGGAGAAACGCTTTCAA…
ASTF_00001206	XLOC_000627	593	162	0.9	-0.389933	0.0323977	1	0	0	GTGTTTTTTCTTCTTCGGTGGTTGCCCCATGGACCCAACCCCTGCCTCCTTTGTCACCTTGCGTTATGTTATCAGACATGGGGCACAAAACTTTCGTAACCACCTACTGGCATTCGCTCTGAGAGCCATATTTTGCCCAGTAGTAGTAATACAGACACCTTGTAACCGAATGGCTTGGCGAGTTCGTTGACTGTTTGGTTGCTGGCACTTCCGAGCAATTCCGTGCTAGATCCGCTCGCCGTTTCGATAACGAAGGTGCCCACGAAGACACACGGTAGGGCCACTGGTAATCGTGGTTCACGTTTTTTTATCGGGAATCTGTCGTTAACGTACATGAGATAATGTAACATTATAAATTACTAGTATTGCCAATCGGATTACGATTAGACAGTCTTCAGT…
ASTF_00001207	XLOC_000628	483	102	0.5716	-0.311309	0.0102047	1	0	0	CAAACACACACACACACACAAAAGCAATCGAAATCGAGGAAGCTAAAACCATCAACCATCTCAAATGAATAAATAAGTAGTAACGTACGAATTAATAATATCGCTATCTGGAGCATTACATAAATCCACACTTACGCTACTCAATCGAACAACTACTATCCTGTTAGAGGTTTGTGCAAAAATTGGTTAGAAAACAGTAGACGAACCGCGGGAGAGTAGGTTGTGTGGGGAAGAAGGGTGAGGACAGAACGGAACAGGATATCAAATTATCGTTAGGGGAGAACAGAACGTGAATAGGAAGCGCACAGGGCGAAGGATGCCGCTTGGTCTGGATGGGATGATGGGACTGACAGCATGAAAGAAACCCACAAAATAAACGAAACCGAAATGATAATTGAT…
ASTF_00001209	XLOC_000630	1334	384	0.4576	-0.150165	0.0395707	1	0	0	GAGCGCAATACCATTTCTAGACTGATGGCAATGGTGAGGTGATTTGAACTAACTTTTGGCAATTAATGGGCTCTCTCCCGCACCCACTGGGACATGCGATGGGGTGTTTAGGATTTCCTGCCTGCCGACGGAAACTTCAGGCGAGTATGCCGTTTCGTCTAGCCGCCAGTAATGAACTGGCGTCAAGTACCCGGAACCGTACTCCTCGGCCCGGAATATTCTAGTGCTGTCCCAAAAGTGCCCAAGGAATTGGCCGTACCAAAACTTTAGCCCAATGTACGGCGTGTTCAATGCGACAATCACCCAGCACCGGCAAACTAGTACACAGTGTACACAGTTTGTATGAGCAACGTTGACAGTTGGCCGTACCATGGGGAGCTGGGGAAGAAAATGGCGCCC…
ASTF_00001210	XLOC_000631	799	519	0.5019	-0.00964533	0.308288	1	0	0	ACATTGCCCTCGGAGTTTCGAAGGCGTTTTTAAAGCGGGCGTATTACGTGGGCGATCCCCCCAACGGGTGCGCTCGAGAAATGCTAGAACCGATTTACCCCCACACGGTCCACGCAACGACCAGCATTGCGAAGGTGGTAGCTATCGGATGTGGGAACTGGGCTACTCAGCAACATGTGTAGGCTATTTGGGCGGGAGGCAGACGTCTGGCTGGAGCCAGGTTCTATACCGGCGAATCCGTAGCTTTCTTGCCGGAGGACCTTCAGACGCGCGCGCCTCGGAAGTGGGCGGACATCGGGGGTTTGCTCGAGCAGTGCAGTTATTGGGTGGGATGCGAACCAGATCTTACGGATGGACCTTGGAACGGTTGTCGCGTTCTCACGAGGAACGAATAAAAGA…
ASTF_00001211	XLOC_000632	487	105	0.7068	-0.525647	0.00940859	1	0	0	GTTCAAAACGTAAAATTAAACAAACCACACCAGTTAAAATAGAGTTGAACAGGAGCGATTGCACGAAAGCGAAGTAATATGGTGGGTAAAAAACGGGCAACCCCTACCCCATATCCAAATCCAAGAGATATGCCAACCAAAAGCGGAAAAACTCCGGCAAGATTCTTAAGCAAAACCAGATAAAGAAAACCACACATACACACACAAAAAAACCCCCCCAAAAAAACACTGTTCGTTCGTTCTCATCAGCAAATCGGGCTCGGGAATTGCTACGCTCGGGAAGCGGACGGGATAATGCTGTGCGCGATAGTTTGTTGTTTCTGAATTCACTGGAGTTGTTAATAGAGAAAAAGGGGAACTAGGCAAGCAAACAAAACCCGAAAACCAGCAGCAGCACAT…
ASTF_00001212	XLOC_000633	2916	222	0.7813	-0.357051	0.00187108	1	0	0	TTGTGATTTTTGTATGTTTCTTTGTTTGCACGTGTTTTGTCTGCGTTCCCTGCTCCCTCAATTATTTGTGTCCGCGCGAAACTGGCCCGCTTTGGGGATCTCCGTGTTCAACTTCACCCTTTTTCCCTTTTTGTTTGAACAGAATATCACTGTCCGATAGGGGATATGAATGTTTCTGCTGTGCAGTTGCAGCATTACCCGTTCGTAGTGCTGTACTCATTCGTCTTGATATCCAAGCTTCTTTCCACCGCGAATCTCTGTCTCTGTCTCTGTTCTTGACTTTTTATCTCTTCTTTCTCTCACTGTTCAACTTATGCTAGTTTTGATGCAGAAAACACATCTACAGATACAACAACGATAAGGAAAATTGTTTCAGTTTACTTTCCCGTTGTATAGTTT…
ASTF_00001213	XLOC_000634	1557	168	0.4571	-0.620713	0.00147761	1	0	0	GATTAACCAGATAAAAGAAAACTTAAAAATAAAAATCACTCCATTGCTTCTGTCTGCCATTTTGCTTCACTTCCTTCTGTGCTATATGGTGGCTGAATTGGAAACTAAAAAACACATTGGCACCGTTGATTATACCACCGATTTTGAGGTTATGTGTGTTGTGCTTTGATTTTTGTTTTCCTTTCCCATTTCCGAACATACACTTATCGCGACCACTGTAAATATGATGCATTACCCTCTGTTACTTTCTTATTTGTTTTGTGTGTTTGTGTTTTTGTACGATACTCGTTACCCGTACGTACACTATTAACCTATTAATTGTATGTCCTAATATGAAGTCCCTGCCATCGAAAGTAGCTGTTGGCTAGTTGGCTTACACACTTTAATAGTATATTTGCT…
ASTF_00001217	XLOC_000638	391	141	0.7995	-0.311209	0.0315578	1	0	0	TAGCTTCGGATAAGACTAATGGGGCTGACTCGTCGATTAAGCTAGGTCTGTGTACATTGATCGCAGTGGGATCGCCATACGGCATGAGTGAGAAATGATGACGTAAACAGCGAGACGCACACACCGTTTATCCAGTGAAAGATCCCATCCGGTTAAACCCGAAAGCGGGATACCCGTATCGCGCATTGGAATGGAAGGCCTTTGAAAGGGGGAGACAAAAAAATGAAGGAACAAATTAAGACGGGGAAACAAAATGTGAACCGCGGTTCGTGGGCTGAAGATCGTATTGTTGGGATAGTTTTACAGGGTTTCTCAGGCCAGTTCAGAATTGTAACACTACATGTCAACAGCATAAAACGCTAATTCGGCATTGTAGATGCAGTTCCACAAG
ASTF_00001220	XLOC_000641	961	189	0.4307	-0.427682	0.00578036	1	0	0	AACAAAAATTGCTGGTACATTACAATAGAACGGGTTCGTGGTTTGAACTACGCCTTTTGTTCGTTGAAGTCTTTTGTTGCCTGACGGAAAGCTGAATCATGAACGATTGGCATGAACCATTTATTCATTTTTGAGACATGTGCGTAACCGTAAGTAAACGAAACTATAGCAATGTATATTGAGGGAGATCGGTTCTCCAGCAAACATTACCCACCCTTGACATGCGATGACGACCGTTTCGAAACGTGCAAAGGTTATTAATAATTGAAAACATAAAAATAAAAAAAAATGGGTTTGCTTTCATTTTTTTCCACGGGTGTAATAACACGTATCTTTTGATTAAAATTGAAAAAAAATGTGCTAAAAACCCGACTTATGTAAAAAACAGAAACTAAATTT…
ASTF_00001221	XLOC_000642	525	60	1.0957	0.238871	0.10593	1	0	0	ACGTGCTCCGCCACGACACACGGCACGCGTGAATTGATCGTTCGTGCTCAAGATTTCGGGGCTTTGTGTGTTTGTGTTGGTTGGCCGTAAAAATTTGCGAATAGCTACTTTGTGAGTTCATTTTTTTCTTTCGGAGTGTTAACAAAGTGAACGAACAAAACAGAACCATTAGAGGCGTCCGTAAGTTACCGTACCGTAGCATGATCGTATTGTGTAAATTTTTAAAGTGATCTTCAGGCAAACAATTAAAATTGTCTATTAATACTTTCCTAAATCGTTACGACGGTATGAACAATGTTCAGTTTGATCACTGATGTGCCAAAGTGTTGTTCAATTTAGCCTGTGAATAATCGTTGGAACTACTTGGCGATCCTCAACCAAATGTTGTGAAAGTTAAGT…
ASTF_00001224	XLOC_000645	474	231	0.8938	-0.388677	0.0665143	1	0	0	TAGCACCAACACTAGCAGAATACCACCAGAGCTAGACGTTTTTCTTCTATCTTATTGGAATTTTCTTTCAACACAGCACACCAATCAGTTGGGTTTTGTGATGGGTGAAATCTGGCTACTTCAAAACATCGGACGACCACATCAATTGGATTTTCCGCACTTCCGATGGTGCGTGTGTCACGGCAGGTCAAAAACTAGACTTGCGACGCACAAACATTACACAACACAACTGCTCTTCAATACACGCTTCTGCGAATTATGTTATACACCGAAAACACGATCCGTACTGAATCTGATGTCTTTCTTTTTCACGTTATTGTTGTCGATCTGATTCTTCAAGAAACTATTTTTAATGCTTTGCTTAACAAGTAATTGCTTCAGTTAATTTTCCATTTCACA…
ASTF_00001225	XLOC_000646	711	105	0.9013	-0.926279	0.00484013	1	0	0	ATGTGTTTGTGTATGTCGTCGTGGGGGTATTTTTTATATCGTTAAATTGTTTCATTTTTTAAACTATTATTTGCAACAGCATTGCCCTTTTTTGTTGTCTATCATATTTCCGAAATATATTTTTATTAAGCGTGTGAAAAGGATAGATGGCTCTTTTATCGTATAGAGTAACGAATAAATCGGTTGCTATTATTAATATGCCACTGTCAGCATTATTTGTGATTATGTTCTGCTTATGCTAATTAAGTCATGATTATATATATATGGTTCATGCGTAAAAGCTTTACCAGACTTTTTACTGTCGGACGTCTGATTGTTTTACGGAAAACTTATTTACGAAAAAAAAACTCTTAAAAAAGAAATCCTCTCATTTCGAATTATTCGAACAAGCTCGATAAG…
ASTF_00001226	XLOC_000647	711	231	0.5857	-0.539228	0.0142143	1	0	0	TTATCTAGCTTTGTTTACCATTTCATGCAGAGTTTACAAAATAGGATCGATGCTTTTAAATTATCAACCGAAAAGCCCTGTATTTTGCTGTGCCCTTTCGGGAACATGTTATTAAAAAAATCTACAAATTCGAAGAAGCAAATGGATGAATATCAAAGAAACTCTATTGCAAAAAACACTCCCAGTAGCAAAATTAAAACGACCAAACTTGACCAAAAGAAAGAGAGAGAAAGAGACAAAGTACAAACGTCGTAAGAAGGAACACTAATTTAACGATAACGAACAACTTAAATATGTAACGGATAAGCACATTTGAATATTCCGAACCATTTGCATATTTACAGCGTAGATGAAGAGGATGCGCGCATTTCTGTTTCAGCCCAGCTCTGTCGATTGTCA…
ASTF_00001229	XLOC_000650	837	138	0.46	-0.328521	0.00600772	1	0	0	ACTCAATTCAATCAGATCAACTACTTAAATACTTACTTAGAATTAGACTCAACTATCCAAACAGTCTGATACTTCTGAAGTAGAAAGCCTCAACTCTCCCACCCTATCCCTCATCCCTATTCCTTCACCATCGCACCATCCTACCAAGAGATCCAAGTTGGCCCAAAGACTCTTTAATATTGCAATAGCAACAACAACTCACTCAGCCGATGAAATTAGAGAAACCCCGTGACAAATGCACCTCTTTCTTAGCGGAAGATCATGTGCGTTAATTGCTGAAGGGAGGGTTTACATTACAAAAGATTCTTTGTTTCAAATAAGCGAGGACTACTCACTGTGCCGGCACTTCCTGGATGCTTCTTGCAATGATTGACATACAAAAGGGGGAGGGTTAGTACT…
ASTF_00001232	XLOC_000653	1859	312	0.5552	-0.254814	0.0110893	1	0	0	TAGAGCTATTATCTGCATTGGTGCATTAAGTTGGAGGTGCATTTTATTGTGATGCCTGCCTAGCGGAACTATTGTAAGGGCAGCATAGCGCGTAGTTGAGCATTTTGAATCGAGCACACGAATCAACCGATGGCTGCTAGGAGGTTACGATATTTTTGTGTAGCAGTGAAACAATGAATCAAAGTAATTTGGCAGTGAAGCTGGACGAAGCTGAAGAAGCTGTTTGTGTTTTAATTTGTCTGTTTGTTTAATGTTTTATATATAGATAGAGTTTAAGGCGGAAGTCCAGCTCGCACAGACTTTTATATTGGAGCACAGAAATGGAAAAGAAAAACGAACAAGTATAATGCTATAAGCGATCGTTTAACGTGTTGGGTGTTTATCGATAAGGCAAAGCTA…
ASTF_00001239	XLOC_000657	1168	144	0.9755	-0.19673	0.0253576	1	0	0	GGTATCCTGTTCGAGCTGGTACAAAAGGCACTCTGCACATCACCACCTCAGAGGGTGGTGATCATCCTGTGTCATGACGCCATTTTGATTGCCACTCAACTTAGGATTCAATCACTAACATACACACACTATCACTCATTTTCTAATGTTTGCTTCGCCGTGTATTACAATTCCGGTGCCTTTCCTTTCTGATCGCATCATATATCCGCACTAGTTGTAGTAGGTTGCCCTAAGTTACCACCGGAAGATCGAGACTCGTCGGGTTGTTTAGACGCAGGCAAGATGTTCCAAGTACTGAGAGTGGGAAGGTCAAAATGTGCCATTATGTGGGAAAGTAATGGTTGGAATCGTTCAGCAAAATTTGGGCCGGTAACCAAATCCGGAACGCGAACGCGATTG…
ASTF_00001295	XLOC_000679	1224	216	0.5565	-0.389483	0.00818538	1	0	0	CCAACTGGCTATCTCTCTGTAGAAGGTTGCCGCCAAAAAAGGCTTCCGACGTTAAGCTACTACCGACCGGCAGGAAGCTGTCGAGATATTGCTTTAGAAATGTGTTGTGCGATCTACTTTTTCAAAAAATAGTCGTTTAAATTCCCGCGCTTACGCATGCCGATGGTAGATGCGATAGAGGCGCCGGTCTTCACACGGCAGGACCGGGGCTCAAATCCTTTCTGAGCCGTTCCCCCCATAGTGAGGATTGACTAACCAACTATGCGGCATCCAATAAGGCATGCCGTTAAGAGGTCGTTAGGCCTAGAAAGAAGAAGACCAAGAAGAAGATTCTCCGGTTTTTTTGTCTTCTTCGCATCAAACATTATAGCCCTTGTGATTTATTTTAATTCGTTTTGC…
ASTF_00001324	XLOC_000696	576	189	0.9976	0.0767363	0.149522	2	0	0	TACCGGCGTCGCACTAGTGGACGGCTGCGATCCTCGCTTTTGTTCCACCGATCCTGCCGGTCGCGTAGCGATATCCATGGAACCAGCATCGGGGGCAAGAGACGGTTCCGGCGTCGGTCTTGATGACGTTCGCGGTCCAAAAACACGGACGATCGCTCCTGTGGAGCATAACACAGCCGAAGGCAGTTGTTGCAGTGCAAAAAGGCGCCCTTTCTTTGGTGGTTCCGACATTATATTTTGGCTGAAATAATCAATCGTTTTATTATTTTTTATGTGAAACTGCTGAGTTGAATTTGAATGCTGCTTTGCGCTTTGAAATCTGAATGTTTATGTTTTCAGCTGTGACTTTCAATAAAGGGTAACAATCACACGCACAATGCCACATTCATGCTAGATGAC…
ASTF_00001386	XLOC_000730	602	114	0.4422	-0.270693	0.00724642	2	0	0	AACAAGGAGGCACCGAGATAGCTCCCAGACTGAATGTGTTGGCGTACCAACTACACACACGCCTCGTTGCCATCCCTGTGCTCGCTGGAGGCGAAGTTTCCATGGTAACCGTCGGTATCCTGTCGCCTCCGCCAACTATACCAGCTGCACATGTTGTTGGCCAGATATGACTGATTCTTTCAACCGCAAGCAAAGGGACGTTATTGCGGTTCGATGGGGGTTTTGGCTCGTCTGTGGACTGCCTCCTCCTCAACTCGTTGTGTGGTGCTTGGGGACGTGATTGCGGGTACGTGACGGGCGACGACTTCTAACAGTGTAGTTTAACAGTGGTGCGCCTAACAGCCTGCATTGTGCATTAGTAGTTCCGCTTTAAAGCCTAGTTCGTGCCGTACATCGTCA…
ASTF_00001418	XLOC_000745	486	342	0.4357	-0.141516	0.078647	6	0	0	AAAGGGGGGTCCCAAAGGATGACACACCGATTGACCAGTTCGAAAGGTTATATTCAGAATTGTGTCACCGCAATCCTCTCGTGGGGTACAATGGTCCCAAAGGATGTACTGTCCCATCGGCCCGATATGACCTGTCTATGTTTCAGATGCTATATTTATGGCGCAGTCTGTGGAAAGCAGTTCCTGTTATGTACGTGTGCACTGGAGATATCAGAGCACACAGCCCCCCGACTCTACAACAGTACTTCAATTCAGAAGATTCCAGAAAACGGATGCGCTCGAACGAAGCTGAATGGTACAAAAGCAGATGAATGCAGATTTTACTCATACCATTCCGTCCGGACCAACCCGTCTGTCTGATTTCATCAGTGCTGCTTGCCAAAACAGGAAAAGGACACC…
ASTF_00001474	XLOC_000776	415	111	0.784	-0.357614	0.0202775	1	0	0	AGCCGACAACCGTAAACATTGCTCGATGTCGGACACCCCCGAACGGATACCATCGATCGCCATCCCGGTCACTGCGCGCATTGAGTGTTGCTATAAAGCGGATGGAAGAAGTATATGAGCATAATCTAAAACAAAACACTACGAGCCTAAGAGCACTTGTTGAGCAAAACAAACGAGAAATCCCCAGCAAACGCGAGAAGACAAAACGCTAAGCAACTGTTTAAAATACACCGAGCACACGCATCACACGCACACAACATAAAACTACAACAAGTAAACAGCGCGGTAAGCTTCACAGTTAACCACAAAACAAGCAAACAAAGAAAACAAAATGGCGGCCGAGAAGAACATCCACCCGGAACCGGTAGGAGGGAAAAGTAATACAAGAAACAAGTTATA…
ASTF_00001504	XLOC_000795	1142	273	1.025	0.446339	0.309442	2	0	0	TGGAAGGCTGCAGCGCGTAACCCCGTGGTCTTGAAGCTGCGTACGTGCGGTTGATCGAGTGGAGTGTGTGCGTACTGTGGTTGGTGCTGTTGTCCGAGAGTCTCAAAACCAATGTACACAACCGGATTCACCTATAGGAAGCGAAGGAACGGAACATAAGGAAACAGTAAAGCCGACACACGTAATAAACAGGGTGGCTGAGTGATTGTTGCTACGGGAAACGGCCACGAATAACGCTCGAAAACGAAAGAGGTGCAAGATTTAAATCATAGGAACCCTTTGGAAGTTTGAAGGTCACTCAGGTTTCTTCTGGCCAAGAGGACCAATACCGTTGGTTGGTGTGGTGGCTGGGCAGCTTTTCAAAACCATCCGCCCAAGTGGGATTTATATTTGAGTGTT…
ASTF_00001557	XLOC_000817	256	123	0.9038	-0.00884829	0.0852498	2	0	0	AATTCGCGAAAAGTAAATTAGCGATTAGCTATAGGAACTCTAGTTCCTTTTCTGTGCGACACCATGAAGGAATTGAAGGTGTCGAACCGGTCGAATGGGCCGAGCCGGATGGCGACTGCAGACGGACGCACCATTATCATGGGAACATTTGATGACCTAAACAAAAGTAATACTTAAGTTAAGACGCTACGCACCAACGATTCCAACCCTATTTGTTAAGCACATTCAATAAACATGTAAGCTTCCTCCATACCTT
ASTF_00001589	XLOC_000834	462	318	1.0314	0.0196574	0.382767	2	0	0	GATTTCAAAGCGCAAAGCAGCATTCAAATTCAACTCAGCAGTTTCACCTGGAAAATAAATAAATAAAACCAAAATATAATGTCGGAACCACCAAAGAAAGGGCGCCTTTTTGCACTGCAACAACTGCCTTCGGCTGTGTTATGCTCCACAGGAGCGATCGTCCGTGTTTTTGGACCGCGAACGTCATCAAGACCGACGCCGGAACCGTCTCTTGCCCCCGATGCTGGTTCCATGGATATCGCTACGCGACCGGCAGGATCGGTGGAACAAAAGCGAGGATCGCAGCCGTCCACTAGTGCGACGCCGGTACCGGCATTTGTTCCCGCTGCAGGTTCCATGCGTGTCATTCCGCGGCCGGCAGGATCGTCTGCGACGTCGGAATCTTCTACTGCTCTCACT…
ASTF_00001591	XLOC_000836	1589	378	0.8104	-0.38117	0.0440015	1	0	0	TGTTGATTTATAATAGTGTTTTACAGTGCTTTCCAGATCATACAGGGTTTCCCAATGTTGTTTGACAATTTCCTAAAAGTTTTTCGGTTTTGTCCCGGAGACGTTTTTTTCCGTTTATTTTTGAATTTAATTTTTTGCACTAGTATCAATTTGTTTCGACACACCTGGTTTTGTTTTACAACAGATAAAGAATTTAGGGAGATGAACAAAAAAGATATTCATGACAAGACAAGTTGACATGAATAAAATTACTTCTTCTTCCTTGGCACTACAACCTCGAAAGGTCTCGGCCTGCCATTTCTGGCTTTCTGTGACTTGGTTTTCACCCATAGTAAAGTAGTCAGCCCTACGTACGGGGAGGCGGCCTAGATGGGATTTGAACCCCGGCCCTGCCGTGTG…
ASTF_00001630	XLOC_000855	1417	174	1.1469	-0.214073	0.0373846	3	0	0	CGAAAGACGCCAATCGTAAATAATGCACACGCCAAAAGTGCTTCCAACGATGAATGAACAAGAAAAGTTATCGTTTGCGGCATTTAGTCAAAAACTGCTAAAGTATTGTTCCAACAGTGCTCATTGTTCGGTGCAAGAGAAAGAAATCGTTATACGCTTTGAGAAGTTCATCGCACAACGAGACGAATGCCTTGCCCATTTGGTAAAACGTAAGGAGGAAGATTTGGTGTGCACCGAGGACATTAGCGACATGGAGCACCAGCTGGTGGAAGCGGTAGAATTTTTGGAAAGCATCGAAAAGAAGTGCAACCTGCTATCGCTCGAACAGCTGTCGATTGATGGTGAAGAACGGCCGATTAAGGAAGACGCTCAGCAGCATGCTTCGGAGCCGGCAGTGGA…
ASTF_00001697	XLOC_000886	162	30	0.8516	-0.761193	0.00665456	2	0	0	GGGATAAGAGGCGTTTTAGTGATATAAGCTTCTATAGCTATCGGCTGCTACCCATTTTTGAAAAGCCCTACCTCCGTCGAGTGTGTACAGTTGATTCTAGGTACAAACAAACCACACCGAAACCATCAACAAAATGAGCTCGCAGTATTATCCATTCCAAGT
ASTF_00001736	XLOC_000902	528	189	0.6862	0.0792174	0.0692126	2	0	0	CGATCGCAGAACACGATCAGAAAGCAACGGACTAGCAAGCGAGCTGGTTGTGAATACGACGACACGCGCATTGCGATTGCGTAAAACCATCCGCATCCGGCGGAAAGTTGTATCTTGTGAATCTTGTGTGGGTGGATAGCGCACCGTGTACGACGTGGTGTGTGAGAAATTGTTGCGAAGAAAAGCCATTTTTGTGGTTCCAACACAGCGCGGCTCGCAAAACTACGACGCAGTGAAGGTTTGCTCTGTAGTTGTTGCAAAACGAAAAAGGCAATTGTTGCTTGAAATCAAGCAAAGTAAGTTCGAACAAGTGCTCCTGTGATACAGCGTGGTGAGCAAATTCAAACAGCAAGTGTTAGTGTGCGTCGCAGCAGGCGGCGAGAAAAATTCGCAGCAGAA…
ASTF_00001743	XLOC_000905	2997	330	0.351	-0.890217	0.000341204	1	0	0	AGGATGTGAGATCTCCCTCAAAACAGCGTGATCTTAGTGATCGTTCTTTTTTTCTTTGGACGCAAAAATCGCAATCTCACACGACGCTGGTGGACGACACATTGTTCCGGATTGTTTTATAGTTGTAAATTTCATGGCGGACACTTGTGTATAGATGCTAGAGAGAGAGAGAAAGAAGGAACCAGCAACAAAATCTAACTCGGGATAAGCCTGTTTTTTTCGGGAACACTTCGGATATACTTTGGATGGACAGCATACGAAACTAAATCGTTTCATCTGGACTAGAAAATTCTGCGACAACAACGACACAAATGAGGCATACAGCTACGCTCCGATAGGTACGCATGAACGGATAAAGTAAATTCAAATTATCAGCTTCCAAACCAGATCCCCGATCCC…
ASTF_00001744	XLOC_000906	2040	207	0.4884	-0.448531	0.00179345	1	0	0	CTCACGATCATCATATAAATATCGATATAAATACTAATAATATAAATATTCCTCATAATGGATAGAGACTTTCTTAGTGAACAATTTTTCTAGACTTTAATATAAAAGCAAAAACCCGTGTTTGTGAGAAGAAGAAGGAAAAAAATGAAACAAAAATAAAACACAGTAAACAGTAAAATGGGGGAAGTTAAAATGTTACGAAACCATTAAATATGAATAGAAAGATGGAAAGAGAATAATCCCATTTCTAAAGAGAGAAAAAAAATGGAATACGAAATATGTGAGCTACAGAAGGTGGAAAATGAAAGGAAATTGCTACAGCTACGATATCGAACAACCTAATTAGAGCGGGAGGTTAGGAATGAAAACTTCCGACACGGTTTTTCTTTTTATTTTGCC…
ASTF_00001749	XLOC_000908	400	96	0.8219	-0.0231009	0.043736	2	0	0	TCGTGTTGAACAAATGTGAATTGCGTTGAATCTTAGTTGAGGTTCTCGTTACCCGAAGTGATCACAAAGATACAAGGAATATCAAATTTGTTGTTAGTGTTACCTGGAAGAAGCATCAGTGTTATTGTGTGTGTGAGTGGAGTTAGTGGAATTATTCGGTTTCCGGTACGAGCACACACAGAGGCCGGCTTATACTAGAGAGAGTGTTGGGGCGCAGTAGTATTAGCCGTCGGCAACGTCGCTCGATCGTACGATGGTAGTACTGGAAGGTGGTACGATGGGGACATCATTGCTGGGCGGCCCTTACGCCCAAGGTGCCCCGGCACTTAAGATGATGCAGAAGCGTTACGTTGGATTGCACCAGTGGCTCAGTCCGATGTGCGCCACCAAGGATCTCAAG
ASTF_00001755	XLOC_000914	2078	369	1.0775	-0.279349	0.0584961	3	0	0	AATTAATTGCACGTGAAACGGCGATTTCTTCTCCACAAAATGCTTACTGTTTACTGTAGGATATGTTTGAGTTCTGCGCAGTTCAACGAAATGGTATCCCTGTTTGATAAATACAAAGGATTTTGCATACGTGATGCGTTGCTGGATTTGTTTCAAATTAAGATTCTCCCCACGGAGATGATATCAACTATCTGCAAGAAATGTGTGGTAAAGGTGTGTACTGCTCGCGAGATCCGCGAAGAATTTATCGCACAGGATCGCAAATATCGACAAATGATCAGCACTTCAACCGAAGAAGAATCACCCTCTACGGAGCAGATAAACGTTACCGAACCTTCGCACGTTAATGCTGAACCCGCCGCCTCCGTTGAAAGCACTACCGACGAACGGGATGAGCGT…
ASTF_00001772	XLOC_000924	572	45	1.123	0.113029	0.0727371	1	0	0	TTTTATTTTAAATTACAAATTTCCCTATTTTTTTAATTTTAAAAATCTATATCTATATACTTATAAGTTGCTTGGATAATCAATAACTGTTACTACAAAACTTAAATACTACTATCAATAAAAGTCTTTAAACTAAACTCTGCTCTGCTCTATCATTGCTGCTGCTCTTATTTCTCTTCCCTACTACTTCTACTTCTTCTTCTTCTCCTTCTCCTTCTCCTGCTGTCTTCTGGACTCTGCTCACTTCACACGTTCTACCCTATTGGCCCACATCGGCGTTTCTATTTCTGCTATCGGCAATCATCTCTTCACTGTCGTCTTGTCTGTCTCATCTTTTATTCTTCCACCATTTTCTTCCACTGCTGCTGCTGCTGCTGTTGCTATTTTTACTACATTTCC…
ASTF_00001773	XLOC_000925	141	6	0.3299	-3.44614	2.03256e-06	1	0	0	AAAGCATGAACAAGAAGAAAAAGGAAAATGATGTGAGCCCAGGGATGTTGTTAGTACGTAATATTCCTTTCGCTTTCACATAACAACAAAAAAAACACAATTATACAACAACAAAAAATGGCGAAATGAACCACCACAAAA
ASTF_00001774	XLOC_000926	944	135	0.7068	-0.823752	0.00328822	1	0	0	CCTTTCACACCATTCTTTCCCCTTTTTCCACGTATCATCGTAACCATAACAACACAGCAGCGTGCACTACACGCACGCTGCGAGAGATTTCAAGTGATGAACCGGGAGTTATAGATAGACAAAAAGGCGTGAGTGGTGGCGCTGGCCTAAGTGACAGCTAGTGGTTTTGTTTTGTTTTGAGATTGTTCTTGCAGAAAAAGAACGAGAAAAAGCGGGAGAGGGATAACACAAATGGAATGTGAAAAAAACACACACACAAAACACAGCTTACGTTTACGCATTATTACGTTTAGCCAAACCAATATTAAAATAGTTGTAAATGTGTATGATTAGAATGGCAGCAGAATTAAAAAAACAAACAAACACATGGCCACACACGCACACAACGCAGTCATCGAG…
ASTF_00001775	XLOC_000927	461	123	0.9967	-1.05452	0.0077859	1	0	0	AGCCCGAGGTGTTAACTAAAGAAAACACCTCAAGGAATCAGGACATTCAGGAACACAATCAAATCAGACAAATGCAAGTGTTTGTGTGGGCGACGCCCTCTACTATCCAGTCGCACTATAATGTTAGCTATCATCATCCGCTACTATTCGTTCGTACCGAGTAATAGTAATAGATGTTTACTTTATCTACTTTATGATTTAAGATTTTTGTTACTACTACTACTACTGCTATTTTTCCCCCCAAATTTAAGATGACTAAATTCTTGTAGGAATTTAAAATAAAAACCAATCCACAACAAAACACACACACACATACACCAGAACACAGGACAAGGATGGCTGCTACTACTATCTATCTATCTAGCTCTAGTATACTATATAACTACTTCTCTTACTCTA…
ASTF_00001777	XLOC_000928	1186	237	0.7009	-0.379466	0.0162276	2	0	0	GAGCGCAACGTGTTTAGCGTGTTGCAGATATCAGTGACAAAAAAATATCAACAAAAAATCAAAACAATCGTAAACCAACCAAGAAGGAACATAAAAGGAACAGTTGTGTATTTAGTATCTAGTTGAGGAGATAAAGAACCACACACACACACAACACAATCATTACCACATCTTAGCAAAAGAAAAACGGGGATCGTTATCCGAAGAATGTTTGTGTGTTTACAAAGTAGCCAACAGCAGCCAACAGGAACGAAATGGGAGGAAATGAATCACCAAAAGAAAAGCACAAATGGTGCCGAAGTGGGTGGGTGTGTGTGTGCGTGTAAACAATGTAAGCGAATTTAGTAAATTTGTAGTAGTTGAAGTTTTGAAGTCGAGCAATGGAGAGCGATCTCTGTG…
ASTF_00001778	XLOC_000929	1779	198	0.8592	-0.304291	0.00996394	1	0	0	CCCTAAAACATTACACAAAATATTTAAATGTTGTTTCAACACACACACACAGTAGCTAATAAGTCTTTGAGCTGTCGAAAAGCTGTTCGAGCTATTCGGTACCACTTTAAAACGGTTCAGCAAACTCTCACTCTCCCCAGGGCCAGGTCAGAATCGGGTCAGAATCGGGTAATGGAAAACGCACATAGGCGCGCGCTCTCGTCGTGAGCACATTTGTTGTAGGTTTAGCAAAATGGATTGAGATGTTGACGGTAGAGCAGCTGAAGCTTATGCTCGAGTTGATTTCCCTAAAAAACCGCCTGATTTCCGTACCTTTCGGCATTGTGTTGTTGCTGTTGATTTGTGCGTTATTATGTCCCCCTCAAAATTAAACAGAACAAAAAAAATCCAACCACCCGC…
ASTF_00001803	XLOC_000943	518	183	0.857	-0.0406667	0.0823008	1	0	0	TGGGATTATTTTTACTCATGGAAAAGTCCATGGAAAACCGGTGCCTTTCTTTGTCACCGATTAACCGATCTTCATCACTGGACAATTCGGTACGATCGCGCACATTCACAACAACACTCGGACAGGACAATCGGACCTGGCGGCGTCGTAATTGTTACCCACTCAGCGGTACACGGGCGACTAAGAGCGAGCGCAATTAAAAATAGCACTGTATGCTGCTGTGTCTTACACTCGGCATGTGATCGTTCGCAATGTACCACCAACAGCAGATAAACCTCCGGCTGTAACACTATTATCAGCAAAAGTAGCAGCCCTCATCTTGCCGTTGCCGGTCGTCGTCGTCGTGGCTGCAGCTTCCTAGACGCTGAGAAAGCTTGACTTGACAGCTGCATTTCTCCG…
ASTF_00001805	XLOC_000945	263	66	0.9174	0.110099	0.0714737	1	0	0	AACAGCAACAGTTTTTATGTTTTCTCAAGCAAGCAGCGCATATCTAATAAAACGTTTCACTTTTTAACGTTTTTGAGCGTTAGTTCAACTTAACCTAGCCAGCTGTGAAAACACGAAAAACTCGTTTCTTCACTCTCACTGACTCTGGCTAGGCTGCCGCTTGGGGCGCGTTGAGGCTTTTGGCGATGGTCCACACGCGCGCACCGGCCATGAAAATGTATGATGGAGCCTTACGAAAGCTTAAGCAGTAATTAAAATTTGTC
ASTF_00001806	XLOC_000946	331	63	0.7683	-0.373882	0.0137311	1	0	0	TATTTCGCCTTATCCCGGGCGTGCTCGGTTGTAGATGTGTGGAGGTTGTGGTGAGTTTGTCCAGTTCTATTGTTGGTCCGGGTCTATTGCTGTGTAGAGTGTGTTGGTGGTTGAGATGTGTACACACGGGACTCCATCCTTCCGTGTAACGGATCTGGACTGAAACAAAACAGAAGGAAAACAACAATTGTGACAGCACAAACATTTGCCTGTGAACAGTGGACCTCAATCTGCCCAGCAGTGATAGCCCGAGCTCGATCAAGCCAGCACCGAACTCAGAAGCTATCGGCGAGTTCCATCCCGTAACAGCAGGGTCTCTGCTAATTACGAG
ASTF_00001807	XLOC_000947	438	39	1.1089	0.0730662	0.0721373	1	0	0	GTCGGTACGTTTCACAACACACACGACTAGTGTGATCAGTGTGTGGTGGCGTCGTTCAGGGTTTTGATCGATTCCACCGCGGTGTGCGTGTTCTCGCTCGCGTGCTCGTTCACGGAAAACGGTTCACCAAGCAAAACCTCACCAAAGCGGGGGCCAGACCACTAGTAATCGTGCCTCAGAATGTGCGCAGAAGATCAATGTCGCGGTGATAAGCGGTGATCGTGTTGCCGTTCCTTTTGAGTCGGATTTTTACCGCGTGATCCTTTTTTTGCCTTTTGCCCCATCCCATCCGAGAAAACGGGCCAGAGCCAGTGTGCCCTTGAAATTTCGCATCCTCCGCGTCGAGATTTATTTTAAGCTGTGGCCCCTCAAAATAAGCGTCCCAACTTTGGGAATTCG…
ASTF_00001808	XLOC_000948	400	114	0.6511	-0.648083	0.0072746	1	0	0	ACAACAAACGAGGGTTTTTCTTAGAGGTGAATTAATGTAAACTCATGTTTGGGAATTTTTCCGTGAACAGGGAAAAGGGAAATTAAACATCGTCTTGCTGCTTCCGCATCACACTCTACAGGCTATCCCGATCGGATCCCGAACAGGCTTAAATAAATTTGTGTCAGCTCGCGCACACATCACACATCCTCCTTTTCGTTTCGCTGTTCCCTAAACGCGTCGCCTTGTCACGGCCATTAAATACTTGTCGCTTGGCTTTGCTACCGCCAACAACGGATAATATCCGATGCCAGAGTTCGTTCGTTTGTTCGCCATCTTGTTTTGTTGGATACTGATTTTTGTTTTGTTAATTTCTCAACACCACGCACACAGATACATACAGAGAGAGAGAGGAACAGTT
ASTF_00001809	XLOC_000949	1696	243	0.819	0.415252	0.0754729	1	0	0	TTTTTTTGTTGTGTTCGTTACGTTTAAATATATGTTGTTGTTTTTTTTCGTTTTCTCTTCTCTTCCTTTGGTTTCGCACATCGTTTTGTTTTAATGTTGCATCACGTTTTCGGTTGTATTGTCATATCTCTGTAGCTTTTTTACATCCTTTTTTCGTTTTTTCTTGCCTGCTGCTGCTGCTATGCTCCTTAAAACCAATATCTACGAAGCGCGCTTCCGTTCGATCCCCGTTCGGTTGCATCATTCCCTCATCGTTGTTTGCATCGATGGCGGATCCCGCTGCTGGGCCACACCTCGCGCAGCAGACGTTGCACAGAGCGATGCTGGTTTGCTGGACACGGGCTGCGCTGGCCTGCAGGCCGAAGGATGCCAGATCGGGCAACATCAGGAACCCGAACC…
ASTF_00001810	XLOC_000950	534	150	0.5373	-0.814804	0.00401523	1	0	0	AGATTTTTTGGTTTAATTTCAATATGTTTCAACCACTCGATATCGATATACATTGCAGTGGCGTGTATAATTTGTTATCTCATATATTATTAACATTTTATCCGCGCACGCCTTTATCCGGTTCACGGTTAGTCCTTTCGGTTCGCATATGTTGCTGTTGGTTTGTAGTTTAATAATTTTAAATAGGTTCGCAATTGCCCAGACAAATGCCCGTTTATACCTCCGTTCCGAGTTTCTGTTTGTCTAGGCGCGCCTGCGAAAACATAGATACTGTAAGTTGTTCTGCATCTACTGTTTCGAGTTGACGAAGAAGAAGATTCAGTATTATGCACCAGTTCCAGTGGTATGTCTTTTACTTTGCCGTTTGCCATTTTGCCTGCTCGTAACCGTTTCTCCCTT…
ASTF_00001811	XLOC_000951	703	156	0.5579	-0.54578	0.00675814	1	0	0	GGAGAAAAAAACAAACGAACTAGAACAAAACATAAGCAGCGTGAACGAATAGTCAATGAAAATCGTCTACTTCAACAAGATTGTTGATATGCGAGAAAAGCCACTAAACGTCTTTTAGAAGCTTGGGTTAAACGAACGTATACCCAAACTTCGCTGAGAAACAACAACATATCATGTTTGCCAGCTCGGAACCCAAATCCCACGCAAACAGCCTAAGTAATGTACGGGAGGGTGCTCATTGAAACACGTTTCCGGTGCAACACGTGCCAAGGGTTGCCATATTCGGTTCAACATGCTATACCAGATTTTAAAAAAACTAAGTTAATGCTTTTCCTCAGAGACTTTCCTAACTTTTATTCGATAAGTATGGTTTAGTTAAGGCACAGAAGATTTTAGACG…
ASTF_00001814	XLOC_000954	818	78	0.637	-0.0976449	0.0105845	1	0	0	ACATTGTTGTGCCGCTTATAGCTTGTATTACATTGAGCTGCACACCAGTCCAACTGTGTGCCAAAAAACCAATCTAAAACTAACGAACCGTTCGATCGGTAAGGAAATGGATTCGAAAAGGGAGCTGTCAAGTGGGTTTTCGTCTATATTTAAACCCGATGCACCGATGATCGGTGAACGGTGAACTGCTGGTGCTGCCAGAAGATCAAGTTAGAGTCGTGCCAACTAACAGCTGAGAAGAGGTTCAAAGCTGCAACCACTTTTGATCTTCGACCCCGAAGGAAAGCGAGAACGGAGCAGCCACACTGTTTTTGATTTGCTATCGAGCGAAATTGCTCCCGGTGGTGTCCTCAAAGGATGTTGCACAAAGCACGTTGAACCGGAACCACTTTAAACCGG…
ASTF_00001815	XLOC_000955	281	54	0.7884	-0.0586349	0.0298896	1	0	0	CCATCAGCTGGCTCAGCTGACACACACCACACCCCTTGCGCTGGTATTGATCGGCATCGGGATGGTAAAAGTGGCTGCCACGTGCGTCAAGCCGCGTTGCAAAGTGCGGCCATAAATTCCGCTGCCCGGTTCAATGATTCACCTACTTGAGGCTGGCAATAAATTGGTCCCGTTTTCGAAATAGTAGGTAGCACTGTTGCGCTACTTTTGAGACTCGGATAAGAAGATCGACGGCTCTCTTTTTTTGCAACCCATTTCGACGACTTAAGTTAGACGTACTT
ASTF_00001816	XLOC_000956	448	69	0.6263	-0.75918	0.00328217	1	0	0	ACGATTTCACCGGCCGGCCATATCTGAGCGTCATCGCGAAACGGACCGAACTTAACAAAGATGGAATACAAATTGCCCTGATCTTGGGATGACATTGAGCGCGAACCGGGGCTAGCTTAGGAACGAGGCTATAGACAACACGAAAATTCGCACAAGTTGAAGAAGTTGATTTTATGTCCTAATGGCCATAAAGGTCGCCAAGTTTAAGGAATAGATTTTTTGCTGCTTTCTATTGTGGTCGATTGTTAGCTGCTCTGTCCCTGTAGCTCCTTATATCACGTCATATTAACTCATAGAACCCTCGTACATACATCACACCTGCATACGATACTAACCAACACATACTGTGAAGATATTGTGTAACTAACAACTGACCAAATGTGTATTTTCCTCTCTCTT…
ASTF_00001818	XLOC_000958	261	27	0.5754	-0.495803	0.00466235	1	0	0	ACTGTGAAGCACACATAGTTTTGCTAGGACATTGATACGCTCTACTCAATCTACACTTTATTAGTTTACACGTAGTTGCTCTTGTTGGGCACAGATTTCACACAGACAAAATGCTGGCCTTATTGTGTGGTGCTTGATAAAAACTAGAAAAGAACTAGACCTTTACACGCTCATGGCTATTATCTTACAGTAAGCTGCCTGGGGAGCTTTAGAATCTATTAGAACGATTAGAAGATTGAAGCAGAGCTTATACATAACGTT
ASTF_00001822	XLOC_000962	737	87	0.9643	-0.256	0.0230905	1	0	0	GGTGACAAGATTGAACTATGAGATCTGTTAACCAACAAGGGTATTCTGGAAAATGAGTTGTCTTCTTGGCTCTTTGTATCCGCCAACTCTGCCTACCGTTACTCCCGCCACTGCAAAACTTATGTGTGGTAGCGTGTAAGCAAAATTGTTTTTTAAACCACCCTTCAGGTTTAGCATAAAACAAATTTAGTAGCTTTTTGTTGTCGTATCATTTATCACCCAAACACTTCTTGATGGCTATCCCATACATACCAAACAATACCACTGTAAAAATGAAACAGCTTTGAGCGTTGAAACAGCACAAATTGAGAAGCAGCACCCAATTAAACTACAAATTTAGAAATGATGCAGAAATAAGAACGCAAACTCGTTTGCACAAACTTTCGATTACTTTATGTG…
ASTF_00001823	XLOC_000963	621	201	0.8113	-0.331948	0.0385076	1	0	0	GCTTTTACATAGATCAAACATATCTAAACGTTGGAAAATGTACCATTTCAAATATATATATAATATATGTGTATGTATATATGTATAATAATATAATGTATCTAAACGTCCGTTCTATTGGGTTTGGGAGGGGGGTGTGTGGTGTGGGTGTGTGTGTGTGTTTTTCTTCTCATCCTTCTATTCTGACCGGTCTCCGATCCGATTGGGGCCATCCATAGCTGTCCTCGTCGATCCTTTCTTCCCTGTTCAAAGTCTCCGGATCTTCGCCAGCTGACTCATATCTGGCATCTGGTTCGCGTCCGTTCGTCGTGTCGTGTTTTGTGTTGTATGGTGTGGAAATTTCACAATTTCAATTTACCTACGAATTATAAGTACTTCTTTACAGGATTTTGTTGGTTT…
ASTF_00001824	XLOC_000964	375	81	1.0853	0.0309153	0.0937882	1	0	0	CTTTTTTTCTATCCGAGAGCAATTAAAACAATTCAAACGCGCACTGTTATATCACACGCACACTCGCACACACAGGCGGACCACACACGCGAATTCATTGGGGAAGGTCGTTTGAATGCCTTATCTGGCGCCACTCAGGATTATTAGTCCGGAACTGCGGGCTCGACTATTGACAGAGTTAACCGAGCTTCTCTAATGCAAAAAGGAAGCAAATTTTCAACCTTGTCCCCCTTGTTTTCTTGTCCTTTGCCTTTGACACTATAGTTGTGTCTGAGCGGTAGCTCTTAGGTCCTTCTCTAAAATAAGTAGTATTATAAATACAATAAATACGGGCTTTGCTTGCTTACTTTCTCCATCTTGCAGCTATCATAATTG
ASTF_00001825	XLOC_000965	464	63	1.068	-0.396808	0.0262904	1	0	0	GTCTGTTGCACTATTCTTATTTTCCTTTTTTAATTTTCTCTATTCGTATAGACGTCTTTGTTTTAATTCTCCTTTACGAACGTTTTTCTACAATTTCTGTTTTTTTTTTCTTCTTTTTTTGCTATATTACTATAATTTCACGTCCATTGTGTATCACACGGTTTTGGTTTTTGCTTGGTTTTATTGCTAGAATGAGTTCAATAGTTTGATCTGCTTGCTATCGTGTGTGTATGTGTTTCCGGAGCTTTGGGGTAATGCTTTTGGGAGGAAGCATCATTCAAAGTCTCTTTTAGTAAATTAAAGCGTCAAATAGGAAAGTAATTTATGTAAAATCTACATCTCTAACGATCTCCTCGCAATTCCCGGGGTTTCCTTTTGTTTTGCTGGTTGTCAAATACC…
ASTF_00001826	XLOC_000966	524	90	0.9138	0.249878	0.084382	1	0	0	TTAGCTCATTTTGAACATTTTATAGAAAGATTTTTATAACAAAAAAAATCCTGATGAATTTAAATTATTAGTAAAGTCTGTGAGGGAACCAATTAGAGAGCCTCGAAGTTTGGAGACCCCTGGTTTAGAGTAAGAGGTTTTTGCAAGTGTTTGCAATAATAGATAAGCACACTTTTCAGCATGTGTGTGTGTGTGTGTTTTTTTTTTTGTAGTAATCAGTCCAACTAAGATCTATAAACGGAAGGACGAAATTTGAGTAGATCGTTCTTGGTGTAGTGGTAGAATTTCACCTCCTTGCACATCTCTACTTCAAGTACTAACATTCGTCCGTTCTTTAGATGAGCCTGTCCATTTGGTACACCGACTTTTCTTGGAACACAAGTCTTCAGCCACTGCCAT…
ASTF_00001827	XLOC_000967	484	186	0.8509	0.11357	0.12003	1	0	0	CGGTCGCGCGAATGCGCCATCAAAGTGGTGCTGTCTCGCTTGCCATCGACGGAATCCTGAGGCGCATACCGTTTTCGGGGAAGGATGCAATGGCGTCGCAACCACCATCATCATCAACACCACCACCACCGTCACCGGTGAGCATTGCAGTGCATCATACAGGCTTGCACGTCGAATGCGTGTGTGTGCGCCGATGACATTGAAAAAGCGTGCGGCGAACGATGACTCAGGCCGGCAGCCGACAGCCTGCGCCCATTCCTGCGGCAACAGGATTGAGCAAAACTACATAAAACTACAATAAACAAAAAAAAGGAAACGGGGACCAACACTCGCGGCAATGTGACTCCCGTGTGCGGAGAGGATGCACTTTTATCTTGTTTTATTGTTATAGCATCAGGA…
ASTF_00001828	XLOC_000968	723	162	0.4944	-0.0328564	0.0190825	1	0	0	AATGCCGCAGTGGTTGGGTTTTATGTCCTGCTCACTCGTCGTCGTTGTTGTTGCGCTTTGCGCTATCTCGATTAACACAGGGCTCTGAGCAAGCACCAACTGCAGCGCTTTCGAAGCTAAAACGCTCGCACGGTCGTCGACTACTCTTCCCCGCTCGTTTCACCCCATTCGTGTCCTCCCTCTTCCTTCACAAACCAATCCATCGCACCATCTCTGGGCCTTCTGCGCGTACAGGCAGCAGCAAAAAAGCAGCACATACACAGCCGATGTGGAACCAAGGGGATGAAAAGCGGCATAGGGTGAGAGCCGGTGTGTGGTGTGTGTACGGCAAATGAAGGGAAAACGCGAGTGTCAGCTGTGTGTGGATGGTTTCGAAGAGGGTAGCGAGCAAGGCAGGTA…
ASTF_00001832	XLOC_000971	435	93	0.6864	-0.832545	0.00415134	1	0	0	ACCTATTGACCTGATGTTTGCAGTTCAACAGATAAACCTTTTAGCAGATGGATGAACTAGGACTAGGTCTTCTAGGATGGAGTACTGTAATGTAATAACACTTTCCTCAGTTTCTTCTTGCGAGTCAATTGCATTCTTTTTTCTAGAAACAAAAAAAAGGAAAGCTTAATTTGTTTCACCTTTTCATTCGATTGCCTAATTCGCTTCACTCAACAGAAAGCCATCAAACGTACCCGTTGGTTGGATAATTTAAACAACTTTAAAGAAGAAATAAAAATACCACTTTAGAATATTTTGCCCATCATAACAAACCTAAGAAAATAACCATTACCATTTATACTTAAAAAAATGCACTACAATCACGTTAAAATCACTTTATCTATAAACTAACTAAAACAC…
ASTF_00001833	XLOC_000972	1157	297	0.7417	-0.514392	0.0233757	1	0	0	TCTGTCGCGAGCAAGTTACTGAAGCAAACACATCAGCTGAGTGTTCTTGATGACGAGGTGTTCAAGCTATTTTTAGCATTTTTCTATAGGCACAATTTCCAAAAATGCTATAAAACGGCAATATTTAATCAAACAAAAACATCAGTTTGTATTGTTCTTGCATGTTTTTAAATAATAGTAATGAGTATTAATTAAAATGTAAAAATTCAATTCCGTAACCGGATTCGGAATCGGTTCCGAAATATGTTCCGGACCTACTCTTCGGAATCGATTCCAAAAAATTAGGAGCGCTCTGGAATCGATTCCGACCAAACCATCATTTTGCCCATCACTAGTGCACAGGTTACTTTGATTACTACGGCGGTAACCATGGAGAAGTAACGCAGCGTTAGCCCTTTG…
ASTF_00001834	XLOC_000973	504	36	1.0044	-0.448465	0.0145267	1	0	0	GCAACATTTAATTTTAATTTTAATATTTAAGTAGCTCTAAGTGTAACACACGCATTACACGCAATCGAAACGAACCAAGAAAAAAAAGGAAAAGAAAAGAGCGAATCAGTCGAAGAAAGCTAGAGCAAACAAGAGCTACCCAACGAAACGCGAAGAGTTACTAATAAAAAAGTGTACTACTACTTCGAATAATTTTGCAAAAAAACGAAACGAACCTCCAAAAGTCCCAAGCGTGTCAGCAAGCAGAATCAGCAGCGGTAGTGAATCACATATACGAAGCCAAGCTTGAGGCAACATTTGCAAAACGAGCGAATCGCACTGCAGTGAATCTAAACGACACGTTATTTAATTTATGTTCGAAATTACGTTCAACGAAGAAAAATCCTAATACGAGTTAGA…
ASTF_00001835	XLOC_000974	448	0	0	0	0.00165622	1	0	0	GTGTGTTTTTTTTTTTGCTTTATAAGTTTCAATAAGTTTTGTGCTACAAGTTCTACATCTACAAGAAAAAATACAAGTTTTAATTTGTGAGCAAAAAAGAAGAAGAAACCCCCAAGTGCGATTACTCGTCGGAATTCCTGCGTGCGTGTAGGAATTGTGATAATACACACAATCGACTAAAAGTGGGCAGCACAGCTAGCGTGTGGCTAGAAGACAACAAGGGGACGTAACAGAAAAAAAGGAACTAAAACGGCAAATCGCAACCGTGCGTGCGTTCGTGCGTGAAGTGACCGTAGCAGTGGCACGCGGCCAGAAGTGTACACGGTGTTGGTGGTGTTGTAAAAATAATTGAAATCCGTACCGAAATCCGACGGCTGCCATCGCCGAGATTGTGAGGAC…
ASTF_00001841	XLOC_000980	243	153	0.463	-0.308826	0.0160079	1	0	0	GTTTAACTATTTCCTTTCCAGCTTGTGTTTGCGTATCCTTTATGCTAACGCCGCATTATGCTAAAGTTTAACTCACTATCGTGGTCGCAAACCACCAGTTCAAACCAATGCTATAATGTTTGTTCATTGATCAGGAAGACTTTCGTTTCACATAAGGTAAACATTCATCGTGCTGGACGCACTTGCCGTTTGTCACATGCTGTAATGTAAATTTTAATCGCGCTGAATGCGTATGTTGAGGCG
ASTF_00001842	XLOC_000981	242	84	0.6619	-0.261462	0.0176289	1	0	0	CGTTCAGTTTTGACTTTCACACACGGTTCACGGTTTCTCTGCATTGGCGAACACAGCAGCACAGCTCTTTTTGCTGCGGTATTTAGTAGTAGCTGTTACCATGGATAACATTTCCAACGCTTGCTTGATTGTTTTAGGATGACTTTCTCTCTTCAATATGCTGCTTTTGGGAACAGTTTGGACACAGGGCTTTTGTTTCATGTTTTTAATGGCTTATGATCTCTGTCTGCATGTGTGTTTGA
ASTF_00001843	XLOC_000982	1046	165	1.1292	-0.430836	0.0325077	1	0	0	GGGATGTGATAAAGCCAATATTACTGCTAAATATTCTTTGCCTGTTCCTTTTCTATGTCCACCCTTTCGTTTGTACCCTTAAAACAACAACAATTTGGCCACATGCGTTTGCTAAACATTTCAAAACATTCATGGTTGTGCTTGTGGCGTTCGACGCCGCAACAACGCTCAATTCAAACATTACGCCTAAAAGGTATGCAATCACGTGCTGCACAGTGACGACTGCATGCTACGCTCACTGTGCGATGTGTTTGCATCGACTAAATACAATTTGACTAATTTGATAATTGTTTTTTTCAGCTCCTCTCCCCTTTCTCTACCCCTTTCTTCCCTTCTGCTACCTTTCAAAACATTTTGCTACACACAAGCCATAATGGTCTAACACTAAAACCAGCTGCT…
ASTF_00001844	XLOC_000983	269	237	0.8192	-0.440054	0.0655952	1	0	0	AGCGCAAACTCAAAACGCATTGTTCGCTGCATGTTCCGTTTTTTCTTTTGTTGTTATGAATTGACTTGTTGCGCGATCGTTTTGTCTTTTGTTTATGTATTGACCCTAGAGAAGTTTGTTCTACAACACTTACAGCAGTTTGGCTGTACACTTGCCCGTAACTATGAAATGGTTGAGTTGCTAATGTGCTTTAGACAAGAAGTCGCCCAACGGGATACAAGCCGAGAGGAACGGTGGCTCTGTGTAGTAGCGGTGCTGTTGTTTGCATG
ASTF_00001845	XLOC_000984	326	63	1.0731	0.0191093	0.0812352	1	0	0	ACATGGTTCCTCAAAAGACCCACGCATTCAGCTTCTACATGACAACCCTTTATCTCCTGAAATAGTCCTCTGTTGGATTCCGGGTCATTCCGGAATCGACGGCTAGCCAACGAAGGTCGACTCCGTCCGACCAAACCGCACAGCTCTCTTTCGCACCGTGACGCTTCACTAACGCAATAGTCGCTCAACACTGGAACACCACCTGACACAACCTAGACCTCTCCACAAAACTCCGCTTTATAAAGCACAACACCGCACCTTGGGACGATCCCGATTCCAGTCTTCACATTGGTCACACCCGCCTGACACATTCCTACCTTCTCGAC
ASTF_00001847	XLOC_000986	754	237	0.4343	-0.370842	0.0134099	1	0	0	TCACCCAACACTAACACCATACCATACCGTTTACCACGGCAGGTGAGATGTGAATGTTGCAGCCTTTGGGGCAATTTTATGTTTCGTTCGTGTGTACTGATGCGTACGAGTTTGTTTCACTGTCTTCTACCCGCCTGTTATTCGTCACATTGCTTTCTTTCTTTTTCTGATTTGTTTAATTCCATTTATGCTTTATTCCAATTGTTGGGGGGTGGGGACAGCCTTCCCATGGTGCTGGAGCTGGAGGCATTTTCATTAGACAAATTTCCTGGCCTTATATGTCGTACGACTGTGGATGTTCGCGATCCTCTCTGATTAAAGGCACCCGTTTTGCTGCTGGGGTGCAGATCAATACTTACGTATGGCCAAATCAAATATGGCCGAAGGACAATAGTTTAC…
ASTF_00001871	XLOC_001000	1005	96	0.969	0.132632	0.0433943	1	0	0	CAAGCTTCTGCTGGAAAAAGGAAGTTTCGTGCGTCGTGCGCCAGGAAGCAAAAGGGCCCTCGTTTAGCGGTGGCCATATCGAACCCGGGGTTGTGTTTTTGCTTCAGCCGACCATTCCGCATTGACCGTGTTTCATCCCGGCCCCATCCGCGGTGTGCTTCAATCTTTCAACCGTAGTGGAAATTGTTGGTTCACAGAAGAACGTACAAACTGTTAAAACAGGGGGAAGGAAAGGGGGGGAGGAGAAACCGAAAACCGCTGCTCGTCGTCGCAAAAGCACGCGATATTTTCCCACAATCAACTTTTGTCGCCCAGACACCACCACCACACAAACCACAGTCCAGTCGGGCAACGCTTCGAGTTCCACCGATAAACAAGGCCTACAGCCTTTAGGATGCG…
ASTF_00001935	XLOC_001034	886	141	0.655	-0.538397	0.00629251	1	0	0	AAATGTCGTAATTTTAAACAGAGAGTAACAAAACACAAAACAAAAAACCAGTGCTAGGGCAGAGTTTTATACACACTTACATTCAACACGCGTTCTGGAGTAATAATTGTGAATACACCGCCAGCAAAACTACAAATCATTGATGCATGTAAAAAAGGGAAATAGAATTCAAATCGTCCTCGAAAGAGACGGTGTTTGTTGCAAGAAAAACGGGGGGAAATGAAATAATTGTAATTTAATTTAAAAACTCAATCTGTAAGCATATTTAATCATGTTGATAAGTGAAGCAAAAATAAGCAAATCAATCCCATTTTCACGAGAAGAAGCTTACAAATGATATGCAGATAAAGACCAACAGAGCAAGTTTGCTTGGTTTTTTGGATACAGTGGATGGGGTAG…
ASTF_00001941	XLOC_001038	743	153	0.6893	-0.945353	0.00359785	2	0	0	AGAGGATTGCTTTTTTTATCATCCGCTGGTTAAAAGCTACATCCAACGTGAATGTCCGAATGTGCATGTGATCGACTTCTCCTATGCAACACACAACGCCCCACCCCCACCAGCTCTCTGTATGTTACCATTTTTTAGGGGGAAAAAAACAAACGAAAATGCAAAACAAACGGCGAGAGCACCCCGAAGACCAAAAGTGATAATAAGGCTTACAGGAAAAGCACACACACACGCGCGCGCGTATAGAGACACGAGAGTGTTTAGCAGATCATAAAACAAGGCGCTCCATGATTAAAACAAGGTCGTACGGTGAAATATAACTACAGAACGTAGCCGTCGATATTGCTTCGATTGTGTGTTGTGACAAAATCGCTCGATTGTTTTAAACATGTGTACACT…
ASTF_00001943	XLOC_001039	889	168	0.5523	-0.958238	0.00217522	1	0	0	GTGGAGAGAGAAAGAGAGAAACAAAAAGCATCAAAATGACAACTCTTGTCATGTCGCGTGTTCGGTATGATTGGCGTGTATTTATATTTACCACACTGTTTATTTTATATATTTTTTATTTTATTTGATGATTTATTCAACCTTCTTTTACATCTCAGCTCACTCAAAACACCTTTGGAGATGAGCCCCCCCCTTTTTTTTGTTCGCCTACCAAGAGCAAGCTTTTGCAATTAAGTTACATTTTGAGAACACAAGAAAGGACACCCACACACACACAGTGTAGAACGTTGAGGATTAATTTTCTTTCTTTTTTCTATGGAAACAGAACAGAGCAACCAAGGACAGAGTAGTGGTTGCGCCAAAAAAAAAAGAGAAAACAAATATGGTTACGGTTCCTGT…
ASTF_00001947	XLOC_001043	881	51	0.7516	-0.901751	0.00162189	1	0	0	CAAAGAAAAAAGCAAGTTTGATTCGTGCAGTAAGACAAAGAAGAAGAAGAAGAAAAAACACACAGACACACACACACACATGAAGTCTCAGTAGGAAGCAGTAAAGGAAAGGTGGAAAGGTGGAAAGAAGCAAATGCAAGAGTGGATAAACCAAAAAAGGAAAAACAAGAATCATATAAGATAATTATGGATATAAATATTTATATAAAAAAAAATCTCCCATAATCAGGCAGGTCCTACCGGGAGTTAGAGAAAGCTCATAATCATACGTACACAAACACACACACACACAAACTCACACAAACACAGGTGAAAGACTTCTGAATACTACCCCCCCTCCCCCTTCCTTCTTGGCTGCACTATCCTCTAGTTTTCGCCGGCTCGCTTGTAGCTTTACTT…
ASTF_00001956	XLOC_001048	1004	216	0.4272	-0.557817	0.00503973	3	0	0	TGATGTCACGTTGCTCACTCGTGGCAGCTCGTTCAGTTTATTCTTCAGTTCAAACGTCAGTTGCTCCAGGTGCAACGACGTATCATTACGACGGTTTCCGATCTTACGGCTGGCCATTTTCGATGAAATATGGTGCTGAGATGAGACACAGTGGAAAAAGCGTCTGTTGCACACTTCAGCTTGCTAAATAATGGTTTCAACGCATGCCTGACTTTTACTTATTAATTATTCCTATGGATGGTTTCCAATGTGTGCTGAGATGTGTTTTCAATTCACACTGTCATTATCTAATGTCGTCTAGTAGGCAAACAGAGATTTGCCGTGTTTCTCATGTTTTCAATTTAGTGTTTCGTGTTCCGTGTGCCGGCCTCGCATTCGCCCGTTACACACAGTGTTTGA…
ASTF_00001967	XLOC_001053	858	132	0.9571	0.313267	0.101177	2	0	0	GTTGGTAGCATTTATCCAAGGCCTCCCCTGTCCGCAACTGTGTTGTGTTGAAAATCTCTCGTTGCTGGTGGAATCGTCGAACGACCGAACGATAGGAAAAAGGCCCTGCGTAATTTGGAGGAAAAAAACACGTCCCAATTCGGCTCACGGATTTCGTCACCCCAAAAACACTCGCACAAGTGTCGAACTGCAGCTCGCACGACTAGCGACTGGTTACCAAAGTTGTGTGTATACAATCTGCTGCTGGAAAGGATCCCAGGTTTGGGTTGGAACGATTTGTAGGGCGGTGCAAATCGACGAGCGAACTGCCTTGCCAGCCTGTGGTGCTGCTCGATAGTTCGGGGAAATGAGTTTTGCTTCAGAACGCAATTACAGCAGGAAAATTGGAATCACACCAAG…
ASTF_00001986	XLOC_001060	1408	183	0.5425	-0.729882	0.00205557	1	0	0	CGGGGATATTAAATCGGTAATTAAGCTCAAAAGGCGCTAGACCGTGATGGGGTTCTTCCGAGTACTTTATTGGTAGGTCTTGCGAACTGCGATTTCAAAACGGTGCATTATTTAAAACATGTGGAAGCTTGTATTATTGGCCTTCGGGAAACACTGTACATTTCACCGATCACCACTTTTCCGTTCTACGTTTTTACAATCGTTAGGATGTAAGTTTAGGCCTCAGAAAATACCTCACAATTATTTAAATTCCCTCATTTGTCTCGGGACTTTATCCTGGGCAACGGAATTGGGCGTTTAGGGTGGGATATGCGGGATATATATTAGCATTTTACGCTCTTACCTCTTCTCACCAACACCCACAAACCTAAACGATTCGGAGCAATTTGTTAAATGAAT…
ASTF_00001991	XLOC_001063	577	18	0.7619	-0.589595	0.00393416	1	0	0	TTTTTTGTGTTTTGCTACCTATTTATAGCCATATCGCGTGTTGCTTTACGCCTCGGTTCTGGCTACTACTATTACTACTACTACTACTACAACAACTACTACTACTACTACCGAATAAAAAAGGTACAGTTCTGCGAAACCAATCACACCCGAGAAAGTCGGCATCAGAAACGAGAGTAGAAATCAACAGTGTACGTATGTAAAAGTAGACATTTTTGCCTCTTATATGTAAGCGAGTAAACGCTCCCGCCTGTAAGTGAACCGAAATTCTGAACTGGTGTGTGAAAACGAAAAATCGATTGGCCAGACTCTCCCATCCAAACCGGCTCTATCAACCTTCCCAGACGCACAAATGTCACAGCACCGTTGAACGGATTGAGCGGATTGAAATTTTCCTAC…
ASTF_00001992	XLOC_001064	4341	180	0.7018	-0.768868	5.61614e-05	1	0	0	GTGCTGTCAAAACATGTTAGTGGTAGTAGTGCACAGTGGTGTGCCACCTTTGGTCAATTATTGCTACACTGACAGATGGTTCAATCACTAGAACACTGGGGAAAAAAAACCTCATTGCGCAATTTTTGGTTTAGTTTCTTAGCTGTATGGATGAAGCACCACCATCGGCCATATTGTTGACTTCATTACAAGAAAAAATCATACAAACAAAGTAAAACCAATCTAGGTCATAAAGCAAGTAGAAGGCGCGGAAGGTTAGAAATAGGTTGGCAAAAGTGACTGATTCTCCTAAAATCCCCCATTTATCTCTCTCTCTCCATCCCCGCCTCATCACCCTAGAAGTGCTAGTTGAACTACATACACGCGCTAGTTGGCGTACATGTCTATTTAAATGCAGAA…
ASTF_00001997	XLOC_001068	1841	306	0.6736	-0.138426	0.02004	1	0	0	AATCCGGCACTACGTGGTGGGCGAGGGTGTACGCGTCGCTAGCGTATGCGAATGATGGTTGGTGATGGTTGGCGGTAGTTGTTGTTGTTGTCAGCGGTTACCAGAGAGGTTTTGGGAGAGTGCAGAGGAATCAGAGTAGTACATCATTTTGGACAACTGAACATGGGAGACATAAAATAAAAAATAAAACCCCGAGATTGTAGGAAAAGTAACTCATAATCCTATTTCGGTATTTACCTTTTGCATTCTATCGCCTAGACAACGATAGTCACAAATCATTTGTTCCCCTATTCACGTTGTCTAGGCGGAGGGTGAGTAAGTGTGTGAATGCGCATCAAAAGGAAGCTTGATGCAAGAAGAATTCTCTGTCGTATGTAACTAGCAGTTGGTAATAGTCTT…
ASTF_00002021	XLOC_001081	1181	201	0.5917	-0.769335	0.0034504	1	0	0	AAACATCCAAACAATCGAGCAGACTGTTTTGCTATCCAGCCTCCCCCCCCCCTCCACGTCCCTTTTTGTCACCCGTTCGTACCACTCTTCCAGTCAACATCTTTAGCGTAACACTCGTATGTAGACAGTTTTTTGAAACCCTTTTGCTCTGACGATGCTCTGACGTAATGTGTAAAGTGCGTACTGTTGTAAAGTAAACCGTGTATTCATGACTAAGACTTGAAAACTGCAAACAAAAAGGGGAGGGGGGGGGGGAAACAAAACAAGAAAAAGTGCATTGTGGGAACTTTTTTTCCGAACTTGGGGTGGGGGAAAACAAAAGAAGAAATAGATCTTACGTACCAGTATGTGTATAAACGAAGAAGAAGGAATGAGAAGAGGAAGAAACGACCAGAAAGA…
ASTF_00002030	XLOC_001089	2439	327	0.6239	0.0434916	0.0143531	1	0	0	TACGGGAAACGCCACACTACAACAGGAAGTTGTGTCTATTTTTAGTCCGCCGCACACTCATCGTCGCCGCCGGAAGTGTTCGCCGATGCAGTTCCTCCCGACAACGCTTTACTCCTTAAACAGATAAGGATAAAAGAGTGTGTGTGTGAGAGAGAGAGAGAAAAAGACCGCAGCACGGAGGTTTAATCAACTTTTGCACCACAGATGGACCTCCGCTAAATAGTGCTGGCGAATGCAATCAAACCGTAGTAGACCAACAATACTCCGTTATCCATCTTCTCGCAAAGGCCGTTTGATGTGGTACGAAACCACAACGGCGACGCATTCCTGGAAAGCGGAAGTGCAATAATGTGACAAATGGGTAACTGGGTTTGGTGTTCATTTTTAGAATTCCACATC…
ASTF_00002035	XLOC_001091	541	105	0.9164	-0.0507412	0.0484071	2	0	0	AGCCCTCCTGAAAACTAGCTTCCCTGATGTCGTTCTTCTTTTGATAGGATGAACCGATCCGATTGTGTACGGTCCGAAACGGCCAGGAAAGTTAGAATAGTATTCGGATGTTCCGGGTCTATCTTCCTCGGTGAAGGTTAGTAATATTATTCCTGGAAACTGTGTGTATTGTGTGTCCTAATTCTGGTCTCCCTAGCGGTTGTTCCAATAGATGGTGACAAGGAATTATCGCTTCTATCCCAATGAGTGGAAGATCCGGTCCAGCTGGTTATCCCGGAACAGTAGGATTCAGTTAACTGTGGAAGATCCTTGTTAGCAAAACAAAGGGAGTATCAGTTCTGACCGGCATTTTCGGGCACCCTTTACTTCGTTTATTCCGCAGCAAGGAGGCAGCATCCG…
ASTF_00002038	XLOC_001093	736	279	0.8635	0.107641	0.18447	3	0	0	GCTCTGGAATGGTATGGAAATGGTGTGAAAAATTCACATTCCAGCTGTCAAAACGCGAAACAACAACAAACCATACCGAAACGTCACTTCACCCATTTGACACTTACATAATTCGGTGCAACTTTGGAAAGCGCCAGCCAATGATTCGCAGCTTCTGGAACCGCTACAAGGTCGTGATTATCTTTCCAGCGCTCGCGTTTGGCTCGATTGCGGCCGACTACAGCTACACCCGGCAGTGGAAGAAGGCACGGTTGGAGCACAGCCAGCAGCAGACTAATCACGCGTAACCGGACCCTACGCTATCAACCCCACTCCCCCTGCAACGCTATCAACACAACCGCAACATGTTCGGACTGACCCGCCAGTATCTGTGGAGTGTGGTGCCGATGTTCGGGTTCG…
ASTF_00002066	XLOC_001109	573	132	0.8663	-0.79628	0.00903298	1	0	0	GATCGATTTTTACTTCCAATTCATTAGCATATTCAGGTTCATTGCGCTGTGTGTCGATATATACTAAACGTTAACTTAAAAAATGGTGCAACAAACAAGCTGAACAAATCGAAAAGAAGAAATGGAAGAAAAAGCGTCAAACCAAACACGAAGAGCAAAACAAAAAAAAAAACAATATAAAAGACAACTAAACACATACACCATCAGAAAAAAGGAACAAAACAAAAACCAATACGCAGCAATACGCGATTAAGTGTAGCAAAACTAACAAAACACCACCCTTTCTATTATCAGTCTTTGTCATATTCTAAAACTGCAAACTCGAAAGAAATAAAAAAAAAAGTGGAAACGATACAACCCTAGGCAAGCGAAACGAAGAAGAAGAAGAAGAAAAAACAC…
ASTF_00002067	XLOC_001110	1748	135	0.614	-0.360575	0.00252128	2	0	0	AAAATAAGCTTCCTTTTTATGTTTAAAAAACGGCAATATTTATATTATTGATTGTACAGGAAATTTTTCACCACAGTCATAATTGCAGTTAATTTGACAGGCAGACTCTCTTTGTTCATGAATCAGTCGTGAGATGGTAGAGGGTTGTGTGCTTGCCTGGCTCATGGTTTCGATATTTCCAGCAAAAAAGTATGATTTGTTCGCAATGCACAACGCTTGCTATGCTGAGTAATAGCTCACGAAAGCCAGTTTGCGTGAAAAATCTGCAAAGCAGCCGAAAACCTCCGTAGAAAACGCGTACGTACGAAACTTACGATACAGAGCAAGAGCTAAACAAAATGGCGCTTCACATCTGTGCGTTGAGTCTGGCTGCGCTGGCTGCTGGCTTCGCGTACGGCA…
ASTF_00002074	XLOC_001111	1911	318	0.4625	-0.329679	0.00694886	1	0	0	GTCAAAATCCTGCAAGCCCCGCTGCCACCCTACCTCCACCCTTCCGGTGGTAGATGAACCTGTAAAGCCCGCGCACCGTACCGTACGGAAGAGTTCCGGAACCCGTATGGCCGGGGAAATGTTTTCACGTAAATGCGTGTGTGGGTGTGTGCACGTGTGTGAAAGTGTGTGGGAATGTGTTGTACAAGAGGGTAGCAAGGCAGGGAAGAAGGGAGTAGGAGGGTGGCGCTGGAAAGGGGATGAGATTGTGTATAAACTTAACAGACCACCAGTGGCATCGGTGGAATATGTGTGTCTGTGTGTGTGTGTATGTTTTGCTTTTTTCGTAAACAAATCGTCACGAATCCGTACCGTCCGTCGTGTAATTAACATACAGAAGAGTGCATCTTCTGGACACTT…
ASTF_00002080	XLOC_001113	693	168	0.553	-0.433212	0.00976861	1	0	0	GCTTTGCTCTAATTGTGAACACTGCATCACATAGGATTACTATTTCATGAAGTCTTGTAGTGAAGTCTACTTTGCTGAGCTACATGGGCAAAGTGCTTACGCTCGCGGTTCTCAGAGAACTGTCAAACTCGGATGTAGTAGAAACAGATATTCCCTCTTCCTGTGTAAGCTAATGATAAATTCCCTTCATTTTCCAATATTGAATATCTCATGATTAACAGCTCCCTATCTAACCACGTTTCACATCACATAAGCAAACAAACACTCATGCAAGGCACAGAGTGGTCTAGCTAACGCGCAAGGCACAGAGACTCTCTGTCACCGAACACTACACCACATCGGAACAGAACTGTCAAAACGCAGGCCTATAACGTACTATTATTGATTTATGGTTTTGTG…
ASTF_00002101	XLOC_001121	458	159	0.6975	-0.254606	0.0285772	2	0	0	ATTGTCTATATATATAACACGGCCAGCGTTCCACGGTTTGCGCGTATTCAGCTCTCAGCAGTTGCCTTGAGCAGTTCGCAAACTCCGCAATAAACAAAACGACTCAGTATTTTTGCTGGCCCCCCGGTTATTATTCGAGAAAAATAGTGCACATCTGTACTCCAGTGAAAGCATTTCTGTGCGTGTGTAGAAGTCAGTGAAAGGTCTTATTTCTTGTGATTTAAAGTGTGTTGGTGTTCCAGATCACTGTAACGATCGTCTCAAGTGAGAACTCAAGCAGAAGCTGTGTACACACCAATCAAACCAAGTACCGAGATCGCAGAAATCAACAAAGCTTTCCCGGTGTCCTACAGGACCTGTAGCCGAGCGCCGAGGCCGCGACCTAACGGAAGAAGTTTG…
ASTF_00002117	XLOC_001129	1567	369	0.6103	-0.901833	0.00696805	1	0	0	GGTGACGTTTCTTTGAGTGAACCCTAAAACCCTAACGTGCATTTCTGTTGTACCAAGAAAGACTGAATTTGGACTTGTATTTGCAACCGATACGTATTATTAAACCAGGGCCTAGACAAGCGAGCTCTTGGCTTAAGTATTAGCTTTTGGTTTAATGTTTTAAAACATTGCCGGTAGAATCAGTTTAGGTAGTATGCTCTATTTTCCTTTTTCGGGGTCTAGTTAGAAAAAAAAACTTTGAAACTTCAAACTTTAAGACCACATACCTATTTAAATGCGCTACTACTGCGCATCTCCCACAATTCTATTAATTGACGGGAGATTTACAAAAAGGAAGCAAAACAAAAACGCTGTGAATTGCAACTAAAGGTCACGAAAAACGCAAAGGTTTGACGTGTT…
ASTF_00002118	XLOC_001130	854	177	0.6372	-0.292103	0.0152069	1	0	0	GTGGGTTAACATCCAAGTACGATGGTTGAACTGGAGTTGCAAAAGTTTCAGTATATTGTTTTAAAAAGATGGCGACACTTGCTTCTGGACCTAAGGTATACCGTAGCCTTGAGAAAATGGACTTGACCTGTCATTTCCTTGGCCCTTGGCTGGACTCGATGTCAATCCAATGTCAATGTGACAGATCTACCATTCTCGGCCGACCAGACCGTCTGTTTAGGTTATAATTTTGTGTGTTGTGATTGCACCTAATTTATCGCTTTTTTTTTAAGATCGTGCGAAAGGAGCGCAAAAAAAAATCGTTAGTATATGGGCGAATGGGCGACGCGAAAACTATGGAAGTAACAATTTTATCATCTTATTACAAAGGCCTTCTAGAGACAAAGAATTACAACCTAT…
ASTF_00002185	XLOC_001167	984	354	0.475	-0.273925	0.0383082	2	0	0	GTTCAATCAACCCCATCAAAAATAATCAATTACGTTGCGTTTCCAAGCAAACCTAGCAGTACATCATGTCAGCAGATAAATCAACCCCAAGCGTACCTGCTTCCGAGTGCAGCAGCAGCACCATCGAACAAGAAAACCGTTGCACGGCACCGACCAAGACGATTCAGATGGACAGAGACGAACATCACGATGCGGCCAAGAAACCGGACGTATTCGAACGAAATTACCAGTTTGCCCGCATATACCAGGACAGGCGGCGCGCCCTAACGGCCAAAATGGAAGCGAACGAAACGGGCCAGCGTTGCTTCAAGGCACAGCCGATCCGTATTGTAGAGTTTCGGGAAGCGGAAAAGAAGCTCAAGTTCACCGTCCCGACCACGCCAGAAGTAATGAAGCACA…
ASTF_00002273	XLOC_001201	653	153	0.5548	-0.939176	0.00275968	1	0	0	TATTTAAAACAACAAAACACTACTACACAGTTCTTTTAATTGAAAAATAGTATTTTCTGCATTGTGAAAAAATAGAAATAAAAATAAAAACAGAAAAAAAGTGTTTAGGGGATCTTCCGCACGTAACGAGTTTAGGAGTAGTTAAAGTGAAGGTGTTAAAAGAAGATGAAAAGATTAAAACAATATTAAACTGTGTACCCCAACCAGAGCAAGAAAAAAATATCGAAAGAGAGAATAGAGAAGAAAAAACAAAATTTTGAGTGTAAAAATGGTTCGATTTTAGCACACTCAGGCGGTGATGGAACAAAAACACAAAAAGAAAGGACAATTTTTAACATTACAATCAATAGAAGAAAATCGGAAAATCAAACATAAAAAATTTATATTTTTTGGCCATCA…
ASTF_00002274	XLOC_001202	236	45	0.7733	-0.622353	0.00755115	1	0	0	AACATTTTCAATGACACAATGATTTATAATTCGCAAGCATAATATATACAAAGCCCCACTACCCAGCGTACCCAACGTAGTGCAGAAACATATAAGTGTCTTAAGCAAAAGAAAGATTGAACTTACAGAACAAAACCTTAACAAAAAACCAGCGTGTTAGCGTTGTGGGTGTGTGTATGCATGTGTTACCGGCGTATAGTAGTAGCAGCAAACAAAAAAAAAGCCAGAAAATAAAC
ASTF_00002285	XLOC_001208	456	132	0.9498	-0.246579	0.0479364	2	0	0	CTTAGAGAAGACCTCCGTGCTTTAGTTTGCGTTGTGGTTGGCCGTGGGAGAACCCATGTCGTCCAATGCACCGTGCTACTTCGTCCATCTTGTTCTTGGCGGGGAACGGGTGCGTCCGAAAGGACAAAAGGACCGTAAACGTGTGCCAACCACAGACAGGTGCGGTTGTTGAGTGCTGTGTGGCAGAAGGAACCAGGACAACGTCAGGATTAGACAACCACGAAGGGTGGTAGGGTAGATTCTTCGGATGGGCTTTTTCGAGACCCGAAACCTCACCTGTGCCTGGAGCGAGCTCGACCGGGCCTATGCCTAAGACACGTCATCCCGGGTCGATAAATGGTCCCGTGCAGAAGATTAAACAAACAACATCAAACTGAAAAGGTGTGCCGCTGAACGTGA…
ASTF_00002317	XLOC_001222	405	267	0.6341	-0.258991	0.0629989	4	0	0	GATGGACCACATTGGACATGCCGACCTTTGCCTTAAGGAGAATCGAGACCTCTGTCGGTAAACCAACGTATGACCGGGAAGGAAGCTCATGATGTCACATGTCCTTTCAACTTTCGGGCTCCCATATCGAACACCCTCCTAAAGAGGTTGGTTGTTCGGGAATAATCTCTGATGGTTCCGTGGATTTTTAACATCATGAAAAAATCCATCCATAATCGGGTCGCTAATCGAAGAGAGGGATTTGTAATGCGGACCTCTGCCGGCAAGTGATTCTACAATCCATACACCAATCATTCCGATTACTGCCTGAAACACTGCTATCAACAATCCAATCATCAATGTGATGGAAACGCAAACAAGCGTTGTGCGTTGGCGCAATGGTTCACGACGATTTTGAAG…
ASTF_00002351	XLOC_001240	4262	369	0.911	0.0730113	0.0045384	5	0	0	AGCGGTACGTGAAGTTTTCGTCGCCATTTTTCCATTATTTGCTAGCTAGCTAGCGGATCTGGGTTTTCAGTCTTTCGGCGTTGGCAAGTGAGCCACACACGCTGTCCAATCTGGTGCCGCCGTTGCCGGGCAGCTCAAAATCACAGTAGAACAACAGCACAGCGCGGAAAAATCGGTGCGTGCCGGCGCTTCTGAGCAAAATGTCGCAGCGGAGCTACACACCCGACGAGCCAGCCGAAGGTGAGGAAGATGATGAGTTAATACCGAGCGCCGATTCCAATGAAACGCTGGATGGCGACAGGTCCGAAACACGGCCAGCCAACACTAGCAGCAATGAGGCAGAACAGTCGTTTGTTGGCAAAATTCGCGACAACGTCTCGAGCGTGCTGTCAAGGATGA…
ASTF_00002356	XLOC_001242	1871	477	0.6599	-0.243101	0.0625626	2	0	0	AGCTGCTGGACGAGTAAGGGTTTTTCGTGACTGTCACTCTGAAAACCCCGAGTGGCACAGCAATTTTTAACCAAGTGTCCCGTTCGTTACGTGCAAGATGAACGGGCAGTGCTAGATTTTACTGCAATAGTGGCGTCGTGATAGTAGCTACGGTTAAAAAAGAGGCAAAAGCAAAAAAAAAAGCAAAACGCGCCACTATTTTTTAACGTGTTTATAACTAAGCGGGATCAATTGCAATAGCGGCGGGGCGCCCCAAGTAGTAAGCAGCACGCAGCAGGCGGCGGAAAACAGATCAGCGGTGCTCGTAGCCATGTTTGTTTCGCCGTGGAGTGGTGTGTCATTCAGTATTCCGAAATAGTGGTGTGCGGTTCTCTCCAGCAAACAGGGACACACTGCATA…
ASTF_00002360	XLOC_001245	5178	186	0.9952	-0.689004	5.55753e-05	1	0	0	GTTTAAAATATTTTTCTTTAACTAATTACACCTTTTCGAGTGTTTCAAATCGTCTATTCGTGATGCCGAAAATAGGAACACGGCCTGCCCAAAATAGGAGCATTCTGCCCAAAATAGGAGCAAAACCAATGTTTGCATTTTTACTAATATTTCTAAAAAACTAGGGGTTTAAACAATAAAACATAAATACTGAAACATTCTTTGATAGTTTTACAACCAAAATAATACCACCTTCAATCAAAATTATTAAGTTTAATAATTGTATTTGTATTTTTTTTCTGATCAACTGCACTAAAGTGCCGAAAACTGGTACAGTTACCGTAGGTAAAAACTTTATTTTTATTTTACTTTATTTTCCAGAGATTTCTGCTCCTGTCATTTCCACCATCGCTTGATGTT…
ASTF_00002369	XLOC_001249	1784	168	0.6861	-0.723928	0.00168906	1	0	0	CCATAATATCTTTATTTTACATGCTTTGTTTTGTTCTGTTTTTGTTTTTTGCCAATGAGGCGGTGTGTCTGCAATACATAATATTCTATTTATGATCCACGCTATCGTGTTTGGAAAAGGTTGATATGTGTCGATTGTTGTCACTTAGCATTCGGGTTTTTCTTTTGTATTCTGTTGTTTTCCCCACCTCTTCGTCTGCATGCCATTTGTTAAAATTGTCTCACCCTCACTCGTCTCACTCGGTCTCGCTCCCTCTCGCTTTCTCGCTTTCTCCCTCTCTATATATAATATAAAATAGACACTTTCGGATTATCTTGCTACATCCCGTGTACCTTAGGTTTTAGGTTTTTTTGTTTTTAATTTTATTATTTTCCTAACCATTGTTTTGCTTTCGTCTGT…
ASTF_00002370	XLOC_001250	1911	324	0.7937	-0.642473	0.00938413	1	0	0	ATATGTTTCTGGCCCACTAAAGCAAAATACACATACGCACACACGCGTCGGTCTCTACTATATGTATATGTCTATCAGTGGAAGTTTCACACAACTGTCGCGCTACCAAGAGAGGCGCACGCAAATATGTCCCTCGGTTGTAAGTGTAGCGGGGTAAGTAGTGTAGCGATAGTAGTTAGTATTTCAGTAGCACTATGTGTGTGTGTGTGTTTCTTGGTAAACATTATTGTGTTGAGTTATTGTTTGTTTGCAGTTGTTGAAACCAAACTAGCGGTGTATACGTTAGTAACATCTAAAAATTGATGTGTGTGTGTAGGGGGAGCTGGGTGGCGGGAGGAAACGCCACCCGGGTTACTATTTGAGGTGGGATGATCTAAACCCCGTTCAACTACAAAAACT…
ASTF_00002371	XLOC_001251	1559	219	0.3923	-1.11897	0.000586378	1	0	0	GTACTTGGAAAGTTAAGTCCTCACTAAAAATCGGAACGGGAGTTCCGGGATGGGATATGATTCCCGAGCCTGCCGTGTGAAGACCGACATCGCTGTCGCCTCGACCACCACGGCCGCTCGACCAATGAACGTCTTATTGCTGTCTTAAATATCGACTGCCGCACATCGTGTCCCGAACATGGAGACGCTTGTTGCATGAACTGTGGAACACTCCAAGCGCGCTCATTCCGACATCCGACAAGCATACCAAGTGTGTTGAAATATATTATGCCGTTTTAGTATATAATTTCACCAATTCCGTCCGCTCGGCTCCGATTAACTCCTGAGTGTATTAATTCTTAGCTACTTTACTTATTGTGAGACAGAGAACAAAAAATGTATGTAAATAGCAAATCCTAA…
ASTF_00002374	XLOC_001254	765	111	0.8163	0.223928	0.0533078	1	0	0	TCTCGTCTTCTCGTTTGTCCATGTGTAATGTTTGCTCTTAAACGATGGATTGGCTAGTACTGGTTTGTTGTTGTATAGGTGTTTACATATGAGAGTCAAGCATATGCTACAGAATGGTCACCGCCAACGGTTTACCCCAGGCGTGCTGTTCCAGATACCCGGTCGCGTTATGGCGGCGTTACCTGTGAAGGGCGGCTGAGTTAGCGCAGCAGAGTTAGCGTTACACCATCCCCGGGTAGCCTATCCCTCTATTCAAGTGCAAGTAGTAAAGGAGGCGGACACGCGGTACACGGTACACAGGGTGACGATCGCGACTACATCTCCGATCGCTTGGTGCAAACGCAAGCAATATGGGCAGCAAGAGCGCTACGAAAGCGATCGCTGATTGTCCACCCGCGG…
ASTF_00002378	XLOC_001258	859	84	0.9457	0.154019	0.0464812	1	0	0	TTTCTGTTGAAGTGTTTCTGCTTAAGTTCCTCGCAATACTTTCACAGTAGGCTCCCTAGACCGAACCCCAATTTCCTTCAATTTTTAAGTCCAGTTCGTTGCATTTTTTCTCCCGATTTTTCGGCGACGGTTGTACATTAGTTCACCGCCCACTGTGCTATATCACTACAACTCGTACCCAACTCGGAAACCGGTGCAGAGTTGTTCCAACAAACTCGGAGCAGATTGTGCTGGTGAATACTGGTGATTCCGCGCGGATTTCCTCGCGCAGAGTGAGTGCAAGCAACGTGTCTTCGGGCGTCGTGAGCATCGTCGCTCGGAGTTATCAGTGTCGCTTGGGGAGGAGGAGATGCTACCAGCTATCACATACCCACAGCATAAGTGTTAAAAAGGCGCGAG…
ASTF_00002380	XLOC_001260	140	30	0.7053	-0.810687	0.00394746	1	0	0	ACAGAACACAACACTCGGCTTAAATGTCTCTTCAGATTTCTTCAGAACTTTAGAAAGAAAAAAACACACACACACAAGAGTCTCAACCACAAGTCACAAACGGTACAAGTCTCCCGGGAGCTAGCCACGAACGCGTCTGA
ASTF_00002381	XLOC_001261	273	84	0.7621	0.218417	0.0674489	1	0	0	GGCAGTTGCCAAAGCCGGTACGATACGCTGGTTAGTGCACATGATGAGGATGCCGGACTCATGTCCTACCAGGCAGGTGCTTGCCAGTGATCCCTTCGACACGAGGCGAAGAGGAGCACAGTGAGCTCGTTGGCTGGACCAAGTGGAGTCAGACCTAAGGGAGATCGGATGTAGCCGGGGGTGGAGGAGTGCAGCTATGGACCGAGTCTCCTGGAAACGGATTGGACACCAGGCCTTGTCTCTTAGACGTGCTCCATAGAACAAAATGTCAGG
ASTF_00002382	XLOC_001262	528	138	0.8045	-0.362276	0.0231735	1	0	0	GACTATTTGTTTAGACAGTTGGACAAAGTTTTATGCTAGTGAGATGGATTTAATCGAGAAGCAGTCTTAAGGGCTATCATCCCTTTGGGTTATTGAGAATCTTCATATGCCGTCCATAACTGACCAAGCGTATCGTGGATGGACTCCACCTACTTCACCATCAACAACAAATCTTTCCACGATTTCCACATTGCATCATTCAACGAAATATTCCGGTATCTTCTTTGAAACACAACAACGATGAAGTAACGAAGAAATTTACGTTTCTACACCGAGCATTAAATTTAACAAAATAAGCCTTTGTTATTATTGTTAATAAAACTGGCAATAGATATTACTAGGCGATGACCCAGTTTACGTTAAAACACGGAAGTAGACAGAAATGAATGCTCAAGATAA…
ASTF_00002384	XLOC_001264	570	108	0.4464	-0.615166	0.00322754	1	0	0	TTTTCTCTGGACCGAGTCTGGAAAATGCGGCCCCGTTTCGGGAGGTGAATGTGTTAGGCAGGGCGGAAGCGCCATGTTAATTGAATTTTATCGATTCGCTAGCGGAGGCCAGCAGAGGCGTTAGCAGATTGAACAAAACTATGTGCGTTTCGGGCTGGAGGTTTCATGCGATGTTTCATTTATGCGTTGTTTGCTCATTCCGATCTTTTTGGGAGGATATTGAAACCAGATTCCTTGCAATAAGTTAGAAATCCGGCTGGTAATAGGTAAACACTAGTTCCTTTCTCTTGACCTAGCTGCTCTCTGCTGGATGAAGTCATTCGGGTCAAAGATGCTGTTCGGTACAATTTCTAGATCGCTATTCTACTCTTAAAACACCAACTCCTGCACTAAACGACG…
ASTF_00002386	XLOC_001266	616	219	0.7403	-0.00221742	0.0770306	1	0	0	TCGATCGTGCACAGGATGTCCTCAGACATGCTGGGACTGCTGGGACGCGTTCCATCCAGACCCCGATTCGCCTCTAATGGTTGTGCCTCTTCCATTGGTGACGCCAGCGTGCGGGTGCACGGGCAGAGTGGTTGAAAATAAAAGTGCCCAGTCTGTGTACGCTCCTTGGGGTTCGTTCTTTCCTACGTGGTTCTGGTGTGGTAGGGGCCTAAACGTCCACCACCGGCAAAGGCCTCCGGGCGACGCGCTGGTGGAAGTGGTGCGGTCGGGCATAAATCTTGCGGCAATAAATTAACTGCTCGAGCAACGAATTTGTTAAGCCAACGGGATTAGAGTCGTTGGGTAAACATCCCTGAACTAGGATAAAGATAGATACCGGTGCACACACGGTGTGTGTCG…
ASTF_00002387	XLOC_001267	1531	375	0.7378	-0.403673	0.0356698	1	0	0	TTTTTATTGTAGTTTTATTTGATTCTCTCTACAACATAATGATATAGTAATGTTTCATCTGTGTTTCTCTTCTCGCGTTCCTTTCTCTCTTTTCCCACTCTCGCTTTGTACGTACGTGAATTCTTCTCAACACGTTTGCCAACATTTTGCCAAAAACTGCTCTTTCTCTCCATCCGTCCTCCAGCGTCTTCGATGGTGCGTGAGACTGGGTGTGACAGCTGTCAATGCTTCCCGTGACCTTCCATTTCCCGCTCACTCACCCTCACCCTGCCCAACCCCTAGCGCCTCTGCCTCATGTCTCTTTCACATTCCGGGAAGCATCACCGTATCCTAAATCCGTGTGTTCATCACAATGCCCGTTCCGAATCTGTCACACACTCGGCCAAAATCTTTCGTTTG…
ASTF_00002388	XLOC_001268	679	153	0.5453	-0.794456	0.00364494	1	0	0	TTTTTCTTCTATTTTCTGTTCACATTTTTTGTTTTTATTCCAGACAATGAACTCCTGGGCGATAATAAAGATAAAGATGTAAATCGTTTTTTTTTCTTTTTTCTTCTTTCTCTCTCTCTCTCTTTGTCTTATCTATCTCATCAAAGTAACATTTTTCCTCTCGGTCCACTTAACATACAGACACACACACACTGTTTCCCATTGTTTTTTCCGCTTTGTAATTGGTTTGCTTCTGTTCTTGTTGTCTGTTCTTCTGCTCCACTGCTGCTTTTATACTTGGCTGTTTGCCCGTTTTTACCGTTTTTAATTTTCATTTTAGGTTAATTTGTTTTCCTTTTGTATTAAGCCATTTAGCTTAGCGCGTGGTTCGAGCAAATTGCAACAAAACGGGGGTTTTCT…
ASTF_00002389	XLOC_001269	931	168	0.6444	-0.84889	0.00350216	1	0	0	TTTTATATGTATATATATATACTTGTATTTATATTATATTAAAATATTAACAAAAAGATCCATTTATCTTATACTCAACCACTTACTAGCATACTTTCTCTACCACTTCGCTTACACCGCCTTATCTCCAAGAGCACAATTCACTTCTTAAACACGCGTGTTTGTGTGTGTGTGTATGTATGTGTGCTTTGTTTTCTTTTTTCTTCCTTTCTTATCATACACCAATAAAAAACTATCTCCTACTCTCCGTCTCTCTCTCTCTTTACACATCTTAATCTGCAGGTGCTCAAAGATACGCCATTTTGTTTTTTCTTCTTCATCGTGCAAATGGTTTGATTTCTAGTATCCCACTTTGTTTTGTTACTGTGGTATACTAATAGTCGGTTAATGTGTGTGTGT…
ASTF_00002390	XLOC_001270	2319	333	0.4027	-0.375243	0.00344609	1	0	0	AAAAACACACACATACACGTACGTATCACATGCGCAATCTATCTAATAGACACGGAGCGTTTCGTGGTAAGGTACATGAATCTCTTCGCTTTTGCTTCGCTTTCATTAAACTTCCTTCCTGTTTTGCCTTTCGGTTCGCCCCAAAAGGATGTCCGTGTGTCTCCTTCCACACACGCACACCTACAAAACACCCATCAATACAACCACACCAGTTTGGGGGGGGGGGGGGGCGGGGAGACATTCAAATATCCACACCGAACGAGACAAAAATATCAGATGGCGAGCTTTCGTGCGCCGAAAAGTATGCAAATGCATCTAGCTTCTTTGCGCTGCGTCTTTCAAATAGTTTTTTGTTGTTGTAAATAATCTGCTCTCACTATAGTTACGATTTTCCATTGT…
ASTF_00002391	XLOC_001271	405	78	0.9445	-0.49524	0.0179518	1	0	0	CTTTAAGTGCACCTACGCATTATATGTTATCATTTGCTCTAAAACAACATAATTGAACGCATTTAATGCAAACAACCGAGAGATAGAAAAAAAAACAGGAAGACAGAAAAAAAGGTTGAGAAAAGGCGGTGTTAGTTGTTCGCGCATCATTTTGCAGGAACTGCCGGTATGTCTCGTCTCTTTATTTCCACACCATTCATTCACGTCACGAACATTTTGAACATTACTCAGTGTGTAATAAGATAGCATCTAAAACGTTAACTTAATATGCTTGCATTATTTTCTACTTTCCGTTTATCCTTCTTTTTTTGTTTCTTTATCCCGTGTCAACCTTAGTGCGCACTTGACTCTCATTTCTTTTTTTGTTGCGAGCAGTTTTACATCGCTGCTACCCTCCGT…
ASTF_00002395	XLOC_001275	3083	243	0.5423	-0.692416	0.000398354	1	0	0	CCGGGTTTGTTTCGGATGTTACACAATCTTGTTGCACATCTGTTTGCACATCTATCCATTTTGCACCAACATACCTGCTGTCACTCACTCTTTATTGCAGTACAATACTTAAACAAACACGTGTATTTTTTCTTTGCCCTCTTTTCCCATTTAACTTTCCGTTGTGAAAATTTTCACCCTTCTTAATGCCTCTTTACAGCGTGCAGCGTGTGTCCCTTGATCCATCCCCTCAACAGCTTCCATTTCGTGCTATCTATTTACTATCTCTTGCTTATCATTTTTCTGCTGTCTATTCCATTCTCGTTTTCTTTTCTGTTTTTTTTTTGTTCGTTTATACTCCTTCGCATATCGCATCATTTTACATCATCTACTTTCAATCAACAATATAATGCTGTAACG…
ASTF_00002396	XLOC_001276	614	123	0.5744	-0.390054	0.00862985	1	0	0	ATAGGATATTATATCAAAATCGCTTATTGTTTTCAACATGGAGATACTTGTTGTATGTCCTGAGAAGCCAGAAGGGATATTCCTTACCATATAAAACAAAAAAATGACTGTATGTATAGTGTGTGTGTGTGTGTTTTTGTGAGAAATTATATTTTACTTCTATATGGTTCTCTGCTCTGCATGAATAACGGCTAATTCAAAATTCATTTCAGTATGAATGTTCATTACGTAGACATTAAATTCGAGTGAACTTTGGCATGAAGTAATTTTGACATTTCTGTACCACTGGATTTACTAACAGGAGACTGGAGCTCAAAAATATACCTCACTGGGCGCACAATTTGGAAGAAAAAAAAACCAAAACGAAACTCAAATACTACGCAATTCTACATATGCAAC…
ASTF_00002397	XLOC_001277	344	0	0	0	0.00190539	1	0	0	GTAAAACAAAAAAAAACTCGCGTGCTTCAGGTGTGAGTGTAAGTGAGTGTTGAACGAAGTCGTGTGATATACGGTGCCGTCCCAAGAAGGCAAACTGGATCGGATTATTAGTGCACCGTGTTGTGCTGCTGCTGCTGTGAAACAGTAGCATTGTGACTGTGAACTAAGCTGTGGTGTGTGAGAGTGCAATCATATCGCTCCAGTAGACAGATCAGTGCCAGGTGTACTTAGTAGTGCGAGTGTACGCAGCCACCACAGTTGTCTCCTTACGTACGCAGCCGTTTGCCAGTTGACAGTTGATCGTGTTTACAGCGGTACGCTTCACCAGTGAAATAATAACAAGG
ASTF_00002401	XLOC_001280	596	87	1.0336	-0.788285	0.00987753	1	0	0	ACGAGAGATTGTAATGAAAAAATGAAAAGAAACCCACAAATACTACTACTATTCAATCAAATAGCAGCAGACGAATACACATACATACGAATTGCAATAGATTGCTAACGGTTTTTGACTGAATAGAAAATTGACCCTTATCATTGGAGGGAAAAAGCAATGAAAAACAAAAAAACTGGCACAAAAAAGCGAGTGGAAATGGAGTTAAGTAAAAGGGGCCGGAAAACACTCATTATATTTTAATTTAACAACATCACGAGCGTAAAACACTTTGACAAAAAAAAAATTGAAATGAAAAGCAAAACAAAAAAATTAGAACAAAAAAACCTAACAAGAGATGGTGAAGCAATAAGAAACGAGAGATAGTTCGTAAAACCAAAGGCTGGCAACACATTGTGG…
ASTF_00002402	XLOC_001281	545	108	0.7092	-0.955157	0.00327509	1	0	0	AGAGAGAGAGAGGAAAAGCTTCTTTAGTATTTGCTCGAATATTGCATGGGTATTGGATTACGCATTAAAAAGTGAATCATCCTCCAAAGCCGGAAAATCATGTTTAATCAAGTCCAGATTTTTTGCTTTGTTTTAGAATATATACTAGATAAAGATGGCCGTAGATTATTCACGGAAATTTTTCAAAAATTTAAAGGTTCAAAATAAAAAAGCGATTTCGAAAAATCTGATATAAAAATGGACCGAAATTTAGAGTGTCCGGACGGGCTGTTAAAAAACTTCAAACTTTCTTATTCCTTTCCCCTTCGATGTTATTAGACGCATGATGTAATTATGTCTCTGTTTACATCTAGCATAAAACACCCACTCCTTCCATCTCGCCACATAAACAAAACAAAC…
ASTF_00002404	XLOC_001283	361	219	0.7012	-0.245093	0.0556686	1	0	0	CAGAAAGATGCTTCGGGGGGTTAAGATTGAAGGCTAATGAAACCGAGCAAGCACTCCTCGGTTCGGAGGAGTTCTATTATTCTCATTTGCGTGTGCGGTCTTGGCCCTTGCCGGCTCACACACACACACACACACACACATGCTCACACATTCGATTTGCCTGTATGGGGACAGGGCCACAAGCACGGGAAGGGAGGGCAAGATTTTTATCATTCCACGGATTCATTCACGCTAAACCGGCTTCGGTGCAAGTGAAGAAGCGTCGGTGATTATAATGTTTGCCGCATTCACACCACACTGCACTTAATTTATTAGTTTTTGACACGTCGACCGACACGTCACCGTACCGCACACGCTGGTA
ASTF_00002405	XLOC_001284	459	102	1.0928	-0.609371	0.0243784	1	0	0	GCCACCAGAAGGTGAACCAGGTAGGCATCGCCAACCGTGTAAGCAGCAAACGAGAGCAAATTATCCTCCGAAACTGATTACAGACTATTACACGGCCAGTAATCAATTGCTGCGGATTGAATTAATTGTGCTTCAAAAACCAGCTTACGCGCGGGGGTAGGGGCGCTACAGTAACGCGGTGGTGGAGACGAACGAACGAGAGCGAGAGAGAGAGAGAGAGAAACGATATAGTGGGTGGATGACGGTGTGTGCGTGAGTGGAAGAGATAGAGCCATAGCATCAAGGATCGTTTCTCGTTGTGCGGCGGTATGTGCTGTGTGCTCTGTGTGTGCCGAGACTTTTTATTACGGATCCCGGATACATTGATCCGATGCGAACGGTGGTGTGTGTGTGTGTTGA…
ASTF_00002406	XLOC_001285	159	3	0.3299	0	0.00670356	1	0	0	TGTGTTTAAGGTCTCACAGATATATCAGTCTTCCACTCCAAGCACCGGCAGCCAATTGCTGTTGCTCAGCCCACCTATTCACAGTTCACAGTTTTTCACAAGTGGCGCATTGCTTCCGGTAGGGTATTTTAAAAGCAACCATTAGAAGCAGTTAATGGG
ASTF_00002407	XLOC_001286	2803	156	0.8685	-0.312006	0.00175587	1	0	0	AAAATTAGGAAAACGAAACAACGAGTGGTGCGCTAGTATTGGTGGTAGCAGTAGCAGCAGAAGTAGCGTGGGATGGATGTGTGAAGATGTGTGAGAGTAGTGTGTATACATCAATATATATTAGCCGATTTTTTTAAAGATTAGCTTAAATTTCATAGGAACCAAATGTTGACAATATATGTATATATGTGTGTGTATTGTAAATTTCTGTGTATTACACATTGTTATGCATTTTTCGTATCTGTGTGTGTGTTGGTTTTTCGATTTCATTTCTTTTTTCTGTAAATGACGATTGCTTGGCGTGATAAAATACATGCATTTTTTATATATAATAGAGGTTGTATATTTCATAAAATTTTGATCATCTTTTCCCAACGGTGACCACACACACACACACAC…
ASTF_00002410	XLOC_001289	1587	210	0.8328	-0.141124	0.019339	1	0	0	GATATATCTAGAAGGCGTTGACATTAGGTTTGACGAGTTTTTGGGTTTGAGCTTCGAAAGATTGTAGTTTTGTTGGTTTGCTGTTTGTGTATGAGAAGTTAAGGAAGACTTCAAGGATCCGTTTGATTATCTGCAAATATTCTTCTGATTCTCCTTCTTATTTGACACTTCAATCGTAGAAACCCGTTTGCTTCTCGTTGATCTCCATTCTTAGAAGCGCCGTAAACTAGTAATGTCTATATAACCAGGTTAAGTCAAGCAAGTGATCGACTATCTGTTCTTCAATTCAAGAATTGTTAACAATTCTTCTTATTTAGGTGTTGCTTTTCAGGTAGCAACGTTGTTTTTGTCTATATTGATAGGTTAGGGAGTTCAGATTAATTTGTACATTATATCCGC…
ASTF_00002411	XLOC_001290	414	120	0.6604	-0.37164	0.0147794	1	0	0	CGAGAAGGCCCCCCCTAGAATCTTTTGTGTGCAGCACTGTGGCCTGTCATTTTTGTTGTACAGTGGGATTTCTGTATGGTCAAAACCCATTTGATGTAAACATTGTGCATTGTTCCTTAATACTGTTAATAGACAGTGAATAGAACTTGATAAAATACATTGTAACAAGTGGTTTGAGATTATGATATTCTTATGCTTCCTCCTTTGCTGAATATCAATGCAAGGTAACAAGTATTCATCGAATTACTGTTCCGTTACCGTCCGAGAACGCCGTGCATGTTTTAGGCCCGATTATTCACCCCAAGTGCGACCGAAAATTAGTACGAGGCCTTTGTAAGCCAAAATGAATGGTAGGGTTAGCGGAGAGGGGATTCTAATCAAATAATAACAATATTTTAT…
ASTF_00002416	XLOC_001295	309	6	0.3299	-3.44614	1.62011e-06	1	0	0	ACACACACCTAGCACACCTAGCAGTCTGTGTGCAGCACGGTATGTGACGCATCCCGGAAGCGTGTCCAATTTGTGTTGTGTGTTCTCTTCTTTTTTTTGCTGGCGTGGTGTGGTCCAAGACTCTTGCGAGATACCTCACGACGCTTCAAACACGTGCAGGTTGACGAGTGAGAGGTCAAAAACGGGTTGTGCACTTAGTAGCCGCTAGTAGTTCTGCAGTGTGTTGGCGTTTCGGTGCCCGAAGAGTGGTGTCAATCAGACACGGTAATTTAAGATCACACGTGAACAAGTGGCTGCTGCGAAGGTTGT
ASTF_00002417	XLOC_001296	818	129	0.7509	-0.575508	0.00755857	1	0	0	AGAGAGAGAGAGAGGACATAGCTCGTTACAAGATTGAAAAACAAAATATCTCAACTAACACTGAATCAACGATTTGTGAGCAGAAGCGTGTGTGTGTGCGTGTATGGTTTTTTGATGTTATTGTAACCTGATGGAACCAGTGAAACAGTGAAGCAAAAGGAAACCATGGAAAATCCGTTGTAAACATAAACATGAAAAAAAAACCCAGAACAAAGGTTATTAAAGTTGGTTTTATTTTTTCTTTATGCTTCATTTGAAATTTGAAATGATTTCAAAAAATGTTTACTAATTGTCAAATTGCTGGAAAAGCCACTTGACCTACATATTTACTTTTGAGTTGATCGAATTTTTGTTTTTTGAAACTAATTTCTACCGTCTCCAAAAATTATTTAAATTTGT…
ASTF_00002418	XLOC_001297	2308	159	0.6498	-0.465429	0.00127257	1	0	0	AAAAACAATACATGAATGCCCACCATGTTTTTACAAACGATATTTGAAATGTATTTGAATTTTATGAACCTTGCTCCAAAACACGGGGAGCAACAACAACAATTTTTCGAGCAAAACACACACACACACGCACACATACATGAAGGCAAATGGGGGAATGCGAGATGAGCAAACACAGAAAACGGCTCAAGCTGAAGAGGAAAGATTTTGCTCCTTTTTATCTTCTTTTTTCTCGCTCTTCGGAGATGAATTTATACAGAGAAAACTATTGAAAAAAAAACTAGTCAAAAGGTCGTAAAGTTGCTATACAAAAGTTGGAAACCTTTACTGAGTAACGATAAATCGATTATCTGTTTGCAAAAATAAGAAAAAGAAATAAACAGAATAGAAGAAACAAAC…
ASTF_00002420	XLOC_001299	200	45	0.7733	-0.484151	0.0109578	1	0	0	ACGTGTACAACGCCCAAATCATAGGCCATTTTATTAACAAATTTCCATACAAAAGATTTTACACATTAAGTATTAAATGAACCCATTGTTTAGAGGTCACTTCTTCTTGATCGTTGTTTAAAAAGTTTTCACTCCGAGTCCGAGTACAATCCTTGGTGTGATTACATTCTGAGGTCTGTTCAATCCTCAGCAAGGGCCGG
ASTF_00002423	XLOC_001302	1494	201	0.7887	-0.0595091	0.0214828	1	0	0	TCTTCAAATATTTATTGCTAATCAAAGAAAGCCGTTAATGAACGCTTCAGGAGGTTACTAACAATTGAATGTCTGGGATTATCAGACATCAAACTAACTTTAATGAATTTCATAGAGTCTGTTCCAATTAGGATCGCATAACTAAAATTAATGCGCTTTGCTTCTTAGTTCTATCAGGATGAGCTGTGTTCTAGGAGGAAAAACTATATTTGGAATTCAAACAACACATGGCATCCAATTTGAATAATTTGACAGATAAGGATTGCAAACGTCAACCAACATATCTTCCCGCAAGTCAACTTCAAATATTTATTACTAATCAAAGAAAGCCGTTAATAAACGCTTCAGGAGGTTACTAACAATTGAATGTCTGGGATTATCAGACATTAAACTAACTTT…
ASTF_00002425	XLOC_001304	585	96	0.4359	-0.389569	0.0046954	1	0	0	AAAAAAACAAAACTTTTTCCCGGTTTAGATAGGACAAAATAATCATCCGGCGATTATGCCAACACGATGAGATGGAACAGGGAAGACCGGAAACCAAAACTCATCTCAGCAAAAAAACATGACGTAAAACGGGGAACTCCTGAACACTCCTCGGAACGGTAAAACTAGGGCGAGAAGATTAAATAACTTACGCAAATCCCTCGCAAACCGCAGTATCTGATGAAAGTGTCAATGATTTTGACAAACACTCTAAAGTTAAATAGTTCAGTGTGGGCGCAAACGGTGAAACCACAAAAGGTCGCGTGATTTGAAAAATTGAGAAGAATTAACGAAAAGCAGAAAAAATTAAAAACCCAACAAAAAAAACGTTGCATTTACACACAATTAACACAATTTAGT…
ASTF_00002426	XLOC_001305	477	141	0.9978	-0.581139	0.0269605	1	0	0	GGACTGACTATCAGACTGCGGGGTATCATTAAGTCTACTAGGCCAGAAAAAAGCAATCATGACCTAAGAGGTCGTTAGGCCAAGAAGATGTGATGGATCTCAGCAACGTGTTGAACCTTCCGTACTTTCTTCATATCGTGCTTTTACATCTGGCAGAGAAGTCTTCAATATCCATTTTTAGGCTGAAAAATAAAATAAACTTGATACCCTTTTTTATATGTTTTAATACTTGAGATCGAGGCGATTGCTGTACCGGTCTTCGGAGGATCAAATCTCATCCAGACGGTGAGGACTGAAGCCTCTTTGGGCTCGAGAAGTCTCGGTCTGGCCTCCTTTGACTTGTTGTCCCCCTTAACAGGATAGTCAGATAGTAGGATTTGATCCTCGGTCCTGGCGTGT…
ASTF_00002427	XLOC_001306	1793	228	0.6777	-0.635682	0.00340301	1	0	0	TATGATGGAAGAAAAACAAGGGGGAAATGGAAAACTGTAAAAGCGGGCAAAAATACGGCTTGTACCAAACAAAGTAACAAGAAGAAGAAGCAAAAAACGCAAACAGAAAAAGGAAAAACCATACAGGCTAGCATTTGATACCGAGGAACTTATGTGCAACCCACGTTTGTGCACTTATTGGACATTTGTAGATTAATTATTATATATTAAAAGAAAAACAACACTGAGATAGAGAGAGAGAGAGCGCGCAGAATAAGCAAATAAGGAAAGGAAAACCATACAAACCAATACCGGAAAAAAATTAGACGGCATCCCGCTAAGGCAACCCCACACCGCATGATGGTCTCTTTACAGGTCAGTAACGGATATAATATGACCGTGCAATGTGTGTGTGTGTGT…
ASTF_00002428	XLOC_001307	296	87	0.5459	-0.570035	0.00579923	1	0	0	GGAACGGAGGGGAAAATCATTACGCTTGCAAATATAGGTTAAGCTTACTTAGTCATTTAGGCCTGCCAATGTACAGTAACGCGCAGTGCCGACTATAACGACCCGGCCACAGTAGTAGACAACGACGACCGAACACGCAAACACTACCGCAGAGATGTGATTGGTATTTATGCGAAAACAATTGTACAGCAACGCAGGTACCGACCACTATCGAACGGCTTATTTTTTTTTTCAACAAATCAATTCCATTAATTAAGGATTCAGCCATTTTGCAACTGCCCCATAATGTGCAGAAA
ASTF_00002429	XLOC_001308	288	0	0	0	0.00205472	1	0	0	AGGAGGTAGTACATCTAAGCATTATTCGAGCTCTGGATCCTTCAGAGCACCATTATTTTCCCAGCATCAAACAGAAGGGGCGCGCTTGTGGAGGAGAAACATAAAGAATAGAAGATCGGTCTATCCAACAGGAGGCGTAATCTTTTTCCGAAATTCTATACCTTTAACAACATTGGTTTGTTTAGAGTAAAGAGAAAAACTTACTATAGCTGATTTGAGTCGAGGAGCAGCTGATCGTCGCCCAAATCAAAGCTGCATTTCCTATATAGCTTGTTCCTGGGAGAATAT
ASTF_00002433	XLOC_001312	322	108	0.8339	-0.161476	0.0404978	1	0	0	GAAGCTGGTCATACTGGCTATGCCTGTTCAATTGACCCTAAACCACAGCTATTGAGTGTTGTAAGCTGCGTGCCTCACTATCGCACCACGTGGAGCGTCGTTAGCTGATTCGGAAGCTGCCACATCTCAGCAAAACATCCGACTCGGTGTAGACTGCGATAAGCGATCCCTCCCAAGCTCCCAAAACCTTCGGTGACTCGGTTGGTGACTCAATGCGGAAGAGGCACTATTACACATTCCGCACACACACACACGAGGCTAGAGTGATCAGATCGTGGATCGGATCTTGCTTTCTGCTACAGTGGCATTCCGTTTTTGTCTT
ASTF_00002434	XLOC_001313	451	126	0.7238	-0.299372	0.021127	1	0	0	AAATCCGTAACCCTGGGATGTTAAAAGTCATACAGCTGCGGACACAAGGTGTATCAAACAGTGACAGCAGTGAGAGCGATATGAAGTGTTTCAGTGCATTCTGTCTGTTAACAGCTCGAAAATTCGATATAGTGAACTTATAAACCCCCAAAAAAAAGTGAAAAATCATAAAAGAAAAACAGAAACATCATCAACAACAATGCAAAATTTATCAAAAGAAAGTGCAAAAAATATAACTTGTGCATGCTCTTAAGAATATTAAAGAAGGCGAAGAAAAAAAAACAGTTGTATAAACGAAGCGACAGGCATAGTAAAGTTTAAAACAGAACAGAAGTGAAGCGAAAAGCAGTGTAAAGAAATTTTGGCAAATAGCAAACTTGAAGCTCACTCAACATTCTT…
ASTF_00002435	XLOC_001314	362	117	0.7169	-0.223158	0.0256938	1	0	0	CTCCATCCCGGAGCATTTCCAAGGAATAATCTTTAGTTGATGCTAAGTACTCAGAACTTTGAATTGCTTTCATCAATAATTAATTGTAATAAGTAAATGAACCGGCAAAAATGTAGCAACGAATGCATCGTGAACCACATCGAATTGTTCGTTCGTTCGTGCGAAAACCGATCTCGAGAGCAAAAGGGTGAATCAAATTGCATAGCACGGTAACATAAAGTACAGACTAGCGTTCATCGATTAATAAGAGTTTTCCATTGCCTACAGCGTGAGCTTATTATGTAAACATTAGATGAACAGTTTTTGAAGCACTTTTTCTTTTCAATAACTTGCCAGCGGTCCCGGTGGTAGATGCGACAGCG
ASTF_00002436	XLOC_001315	247	15	0.7999	-0.0293991	0.0247165	1	0	0	TCCGTGACTCAGAGGTGGAAACTTCGTGGACCATCTTCTATAAGTCAATCCAGATCCAGGCATACGCTGATGACATAGACATCATTGGTTTGAGGCTCTCCTATGTAGCAGAAGCTTATCAAAGGATCGAGCGTGCGGCACAGAACCTCGGGTTGGAGATTAACGAGGCGAAAAGTCGTCCAAAACTTCACCTATCTGGGGTCAAAAGTCAGTCCACCGAAAACAACATTGATGTCGAGTTATGCGC
ASTF_00002577	XLOC_001368	716	123	0.7202	-0.12945	0.0212773	2	0	0	TCATGAATAATCCAACAGCATGCATCTTTTGTTTAAAACTTCAAACGGTTGTTTAATAATCTGTTTTTGGTTCGGTTGTATAGTTCCTCCAGCTTAAAATACGCGTATAAAAATATGTAAAATGCTCTTTGTGTTTTGCCGTGCATTTGCGTGCAGCGTTTTGGTACTGCTGTTTGTTTTCGGTTGCGAAATGTAGCGTCCACAAATCACATCTTACGTTTCTTTTGGTGTCAATATGCATATCTCATTGGCTAAACAAACGTTTCGTAACGAGTGTCGGGAGCTGTTTTTGGGACAAACGTCGTGCACCCTGCCCCGGGGGGTTCAACCCTTTGGGATGGGACGTCCCTCTGTTTAGTTTAATAAATAGTTCCTTTTTTATCTATACTCGCTGTTTCC…
ASTF_00002605	XLOC_001385	1073	120	1.0103	-0.0724598	0.0344	2	0	0	CATCAAGCAGTCAAACCGACGACGACGACAAAAGACCGAAAGACCGAGCGCCGTGGCGAGACGGAAAATAGCGCCGTTTTTTTGTTCGAATCGGATGTGTACGGGGCGTGCGTGTGTGTAAGTGTGCGTGTTTTTGTGCGTGTGTGTGTGCGCGTGCGTACGATCGATAAACGTGTGTAGATTGAAAAACGCAACGATGAAGCAATAGGGAAATTAAAGCAAATCACAAAAATAAAATTACTTTTGGCATCGGTATTTTGACAAATCGAATGAAAGCGAAACGCGCCCTCGACACCACATCAACAGGTGCCGCGGAAACGGTGTGTAGCGAGAAAGCACTCCGAAACCCGATCCAAGTAGCCCGACGGAGCAGTAGAAGCGAGATTTGAAATTTGTACT…
ASTF_00002617	XLOC_001393	389	93	0.9802	-0.425395	0.027236	2	0	0	TCTGTCGCGTCCGCGTTCCGAGTGTTTTGTGTTAAAAAGTTTGTACATTACGCAAAACTGTGTGCATCGAACTTAACCCGATGCAATGCAATACGAAACAGAAACAGTGCAAGTGTAGCAGCAAATCGAATTTCCCAGTTTGTTGCCGCCGGAAATTCGCTGTGTTTGATTGATAGTGCGTGAATCGTGTAGTTGAGTGTTTTTTTTACCATTTACATAGTTTCTTGTGTACACAAAGTGAAAGAAAAAGGAAACCAAACGTAGTGAGGTTTGTGAAGTTTGTTGCGGAGCTGTGGCTGTGTGCAGATCAGGTGCAGCTGTTAGACAAAAAGTAGGTTCGGAACATCCGGAATTGTGGTGCCAGTGGTCAGGCTTTAGGTTGTGGATTT
ASTF_00002640	XLOC_001403	1159	207	0.8826	0.114059	0.0677505	2	0	0	ACCCTCTTTAGCCGTCACCCACCCCACCTGTCTACGCAATTCCTGGAACGAAAGTAGATCGCTTGCGCTTGTGTGGTGATCATCGATCATCGCGTACAACGACGGTGTCTATTCGTGCGTGCACTTTTGAGTGTTCACTGTATCTAGCTGTGCGTGAGTGTGTGTGATCGTGATTTTCCCGTGCGCATCAGAAGCACTGAGCACAGTGGGGAAAACCGGGCAGTCCGTCCGTGTGCTGCGGAGCCTTGCATTATCAGTATCGCATCATTGCTCTGTGCGCGAGATCGTTTTGTGCAATGCAAGTGCTGTGTTAGTGTGTGTGTGTGTGCTAACAACAGAGCAAAAAGAAAAAGCGAGTGTGATCGCAGAGTGGTGGTAGTAAGAAAAAAAGAAATCCAA…
ASTF_00002723	XLOC_001436	3839	327	1.0613	-0.0697044	0.00618514	2	0	0	CTTGGAAGAGGTCTCTTGATCTCTTCAACTACGAGGACCTTTCCGATTCCAAATGTCCTGAAATCGAATTTCGAATGTGTTACACAAATGAAGAAACTACATAAAAACATGTTTCTTAAGCATAATATATCCCCGTTCTTTGTCTACGTGTGTGTTTTCATTATCGAAGATGTAAATCAAACACACAATTAGAGTACTCAAGTTGGAATATTTCGAATTCCGCGTGCTGCTGCTGCTGCTATCGTTTGCTTTTGCTTTTCCCCTTTTCTAAGTTCTCCACACCAAAGGGAACCGATTGGAACGTTATTTGCTTTTTTTTCAATTTTTGCATTGGATAGAGAGACACACACCATCGATCCCCACACAGAAACAAACCTCCCGAATTTGTGTGTGTGTGTG…
ASTF_00002735	XLOC_001441	609	42	0.7316	-0.549536	0.00467491	2	0	0	GAACCCGAACGGTTGGCCGAACCGAACCAGCTAGACGAAGCTGTGGCCACATATTCTATTAATAGCGGTGGAAAATCGAACTGAAAATCAGTACCAAGCCAGTACCCGTACGTTGTCGTGTCGTCGTCGCCATCATCGCCATCGTCATCATCAGCCAGTGGACGTGGACGTGGTGGATCAGTGTTGTGAGTGTTGTTACCCAGGGGGCCAGGAGTAGGACCCACAAGGAAAAAGGGAGAAACCAGTTGAAGTGTGCACGGCTTCAAAAAGGACGAGTGGTGGAGGTGGCGGTGGTGGAAGGAACTGCGCAAACGATCGCACTCCTAACGCAGCTGCTGCTGCGCAGTCTTGCACAGCAATGTTCGGAAAAATGCCAAATGGCAAACGGGTGATGTGAAC…
ASTF_00002769	XLOC_001457	520	225	0.988	0.118151	0.218389	2	0	0	AATTCAATAACGCCTGTGCAGTCACCGTATCCGAACAAACAATCCACTGCGCCCAAGTGTACAATCATCCAATTTGCCACCAAGTTTGAGGTTACTATTTTTTCCGCTTACATTGTTCTTTTGGAAGGGTTTTTTTTATGAGACATTTGCAATATATAAGCAGCGGACGAGAAACTAAATGCAGCACAATATTCGCGTGGAATCGTTGAACACTGAGTGAGCAATCGTCAACATGTTCAACCGAAAGTTTGTGGCAGTCGTTGGTATTCTATCGACACTCCTTTCACTTGTTCTAGCTGCTCCTCAAAATGGGGAAGAAACGATTCATTTCGGAAGTCCAGCAAACAGCAACGGTCCAGTGCCGATGAATCCCGCTGAGAATGGGGCCGTTGTCGACGA…
ASTF_00002779	XLOC_001462	547	204	0.8899	0.0775851	0.131632	2	0	0	GTATAAATACGTTTATTCTTGCTTAGATTATTTTTACTGAAACTCAACACCACCGAACATTCTTAATGTGTTTGGGTGTATTTAGTCAAATCAGCAGAATCAGTTCCATACCATTAATTCGCATGCCTCGGTACGGTACGGGGATCATAGCGTTGCCATACACAAAGATGATACGCAGTCGAGAATGGACGATCGTCACTGGTGGATCATGTTTGCGTTTTTACTAGTAATGCTCCTCTCCTTCGTAACCGATGTCCGTGGATTCGATGTGGCTTTGATCATGAAGCAACTTAGTGAATATCTGCAGCGAATATTCAACACGACCACAGTACCGATATTACGACGATTCGAGCGCCCTACCGAGAATCCTCTTGCGGAATGGATCTAATAAGCAGATAC…
ASTF_00002844	XLOC_001487	1106	135	0.7881	0.118945	0.0305342	2	0	0	GTTTACTGTGTGAGTGTGTGTGTTTGTGTGAATATGTAGGGATATGAATTTCTACGTTATTCATGTCCTGCTCTTTTAACCAAGGAAAAGAAGTGATTTCTTTATTAGTGCCCTTTGTGTGCGGTCCGTTTTTACAGGTCCTGTACAAATCAGTAACGCAATGAAATGTGCTGGTGTTAGTGAGTGAAACATTGCTGTTCCCATAAGCAAAAAGGTGAAGATGTGGAAAAGAGCATGCAGTAAACAAGCATCCGAAACAGCAGGCAGAACGCTGCTTTAGTGATCATTGATGAGTTCTCCATCAGATTTGGATTTGACCATCTCAACGAAAACAAACCAGGAAAAAGACTCCTTTGCTTCACGACCACCATTCAGTTCCAGCCGTCATCAGTTGACAAC…
ASTF_00002893	XLOC_001501	816	150	0.603	-0.0861465	0.018473	4	0	0	CGAATAAGGAAGTCGCATTGCAGTTTAAACAAACGCCACCATCGATCGAGAACTAAGACATCTTTTTGTTCCATTCACACTATCGAGAGCGCCCGAATGGCAAAAACACGACATCGTCGAGCCCTTATCACCACGCTTCACCCACGCCCTGCTGTGCTGCGCGCCCTGATAGGAGGATAAATAATTGTGCGTGTCGTATCGTACTTATCTATTACTTGGCCAGCTGTTTCGGTTTCCTCCGGTGCTGCTGCTGCTGCTGCGTCATTTCAAGCGGCAAAACGTGTGGGAAACGGCGCCCTAATGAGATTCATGATTCGTTTCGTTTAGTCGGAAACCATTTTTTCGGAAGTCTACGGTCTCATCCACGAACCTAAAACATTGAACTTCGTCATGGTCAAC…
ASTF_00002926	XLOC_001518	293	171	1.1306	-0.0389225	0.199156	2	0	0	GGAAGTACGCATGCACGTGTGCTTCTTCGTCGTACCGCGTAAAACTCCACCCGGTCTGACTCCAGTTCCCGTGTGCGTCTAGGTGCCTGTGGTCGATCAGTGTGTGTGTGTTGCGTTGAAGGTGCAGCAGTAGTAGCAGCAACAACCGATAAACGAGTGCAATTGTTGCCATTCCGATTGTGTGTGCGGTGCGGTGCAATTGGCTTTTGTCACTCGCACTTTGGATGCTTGGTGACGGTGTTGCAGGGTGAATCGAAACGAAGTGTGCGCAATTCTAACCCTCAACTAACCTC
ASTF_00002929	XLOC_001520	2851	360	0.6624	-0.39539	0.00441796	2	0	0	TCGCTTTTAGTTTAGGTTATTTTCCTTCTTAAACGACTCCCTGTGGTTTTTTGATTCAGCGGCGAACAGTATGGGAAGGATTTGCATTCCAACGCACTTGCCTGTATTATTCATGCCCTCCGCTAAGAGCGTTTGCTCGTGCGTGGAAAGACTACTGGCAGTGGCGATAATTTTGTGTTTTTTGCCCTGGTTTTATTCTCACACCCTTTCCCCACCGGCCTCTTCCCACTGGCGACCGTCTGGTACAGTCGTTCTGGTATGTTTTCCAGTCGCGCTCACCCACCGCCTCACAAGTCTCGTCATTAGCCTGTGTTGCCTTTTAGCCACCTCACGGCACGACAGAAGTGGAAATAATGCTCCCACGCTCCGCAAAACAAAATATTAAAACGACTGCGACTC…
ASTF_00003029	XLOC_001565	480	63	0.7934	-0.219567	0.017378	1	0	0	ACACACCTGCGTCTCAGAATGTGTGCTTGAAGTGCTTCCATTTTGTGGCCAGCGTTAGCAAACATCACCGTGCTGCTTTTGTTGAGTGAAGCGGTGGCACTTGAAACAAGTCGTCCTCAGAGTATCAGTAGCCTGCGGTAGTGGCCTGGTCCCAGCGGTTTGTGAGTGCCTGTGTGTGTGTGTTACGAAATGCGAATAATGGCTTGACAGATGCGAGAAGAAGCCCCCCAAAAATCGTTCCCTGTCTCGGCTACGTCACTTCCGTCATCGTTATCGCGCCCGTGTCGCCCATGTCCGTTATTGGTTCGTGCGTAAATCTAACATCTTTTCGAGTGCCAAAACACGGCCCTTCGGTACACAATGCGTAGGTAGAAAGAGGCACAGTGTGTAAGTGTGGCT…
ASTF_00003030	XLOC_001566	1050	111	0.6626	-1.19069	0.000849228	1	0	0	CGATTAAGGCAAGGTTTTAAATGTCCATACCCATGTTCAGCATAGCGTTACTCAACCACAGATGTGTATCTGTTAGTAGAATCTCACGAAACTAAAACACACGCCACGGGACAGGGCCGTGAACCTGGGATCGTCGTCGTTGCACAGGCAACAATCGATGTAAGCTTTAATCTGTAGCTTTTAATGAGCTAGCTTTTAGCGTAGGCAAAAGCTTTTCGCTGAAAGCTTTCGCGCTCTCACTCACACACAGCCACAGGCGGAAAATTGCAAATGGCGCAAGCTTTCAGTGGAAGGCTTTGGTTTTGGTGAAAGTTTTCCGGTTGTTTTTTTGTTGAAATGTTTTCGCTTCTACGTGTGTGAAGCGATGGAAATGAAAACTTTACAAACCCCTTCGGCGAG…
ASTF_00003032	XLOC_001568	2739	366	0.822	-0.181784	0.0143375	1	0	0	CCCTTCCAATTTGTCTTGGAAAGAAAGGGGTAAGACGTGTGTTATCATATGTTGCTTTTTTTGTTTTGCTTCGTGTCCAGCGGAAATAATTCCTTCTGGAGGGGGATTAAGATGTGGGCTATACTCTCACTAGCTTTAGTTGGTTTCAACACACCTCAAGCGCAAGATCGTGCGGACCATCGACAGGCCTGAATTCCAGTTGTTACGCAGCGAGTGATTAGTTGCTTAGTTGTGGAATTAAGGAAAGTGTTAATTAAATCCACAGCTCCAGAATTAGTACGTGACAGATGAAAATGGCTTATCCGACAATCGTTATCAGACTGTGGCGAATGATGCAGGCCAGCGGACTCAACATTCCAATACAGCTGATTGCTAGTTTGGCCATTGCGTTGGGGCTGA…
ASTF_00003033	XLOC_001569	551	123	1.1292	-0.442984	0.0420828	2	0	0	GAAACCGGGCTAGGAAAGAATGGAAGCTCAGCTTCGTTAATCCTTCCATCGTGAAGCCGTAAATGCCGGGATCCTTTCGGATCTGCACGCTGTATGGAGCGCATCTTCAATTGACACCTTCACCGTACGCTCTTCAGCGAAGGACTTTGACGCGTGGTGGTGGTAATGTTGGTGTAATTAAAAGAGTAGCTACGTGAAAGATTACCGCACGAACACGAACGGGCGCACACTTGAGGGAAAATATTAGCGGAGGCATTAGCTACACAATTCTACACCGGCACAACAAGGCCCGAGTCTCCATCGTACGCGCACCGGATAATGAACAGTCAACTGTGCAGAATGTCAACCAACGCATGGACCGTCGCCGTAGTGCTGCTGGTTATTGGAATTGCGTTTGCC…
ASTF_00003045	XLOC_001577	335	135	0.6563	-0.310879	0.0212744	2	0	0	CATAGCCGCAACAATAGATGAAATAAAAATGTAAATTTTGTGTGAAAAGTGTAAATATTTGTTCACTATTAACAGAAGGATTTGCCATTTTTTAAACTGCTTTGTGTCACGAATGTTTGAGCGCTCAGAAGGGGAAACAACGATTAGAAAGTTCTTCACGCAATTAGAAAGTTTATCCCGGCAAGTTGTTATCAGCAAAAAAAAACTGCATCAAATTGCAAATATCCGAAGGAACATCAAAACCCCTGCAAGCTTTGCAAGCGCATACGTTGCATATGCTGGTATGACACCGACTCTGAACCAGCATCAATCAACGCTATCCCCACCACTGCCAC
ASTF_00003067	XLOC_001584	551	192	1.0345	0.0620273	0.167624	4	0	0	CAGCGACTGTAAAATTTCACCACCCGAGCACCACAGCTATGAACCCCTTTATCATCACGCCCAGTCTTGTGGTACGGTCGTGTCCGACAACATCCGGCAACGGTTTGAGTTCCGGAAATGGCTGCCTACATAGTGATACCGGTGATCGTACTAACGATTATGGCCATCTATTTTATGGTGTACATGTATGATAGACGATTAAAAACCATGCGTGCGTCTGCCGCACCGGCTACAACCACATCCACCTGCACCAACGTACGACAGGAAGGGATAGTGTACACCATTTCCAATGCACCTTCCGCCGGGGGGAATGGCCCTGCTGCTCGTCCCGGTTCGGACCTGAACAGTGCGACACACATTCGAATCGAGCCGGATGGACGTGGCGGTGCTGGTGTACCG…
ASTF_00003075	XLOC_001586	274	75	0.7676	-0.132521	0.0286961	2	0	0	TGTAACTTTCATCCTCCACTGTGCGATTGTCTGATAGGTTAAAAAGACGAAGAACCAAAATCGCCATCAATATTGTAAAGGTAAACCCATATCTCGTACTGCAAACGCACCATTAACCATTATAAGCCGGTCACCAAAAGCACTCTTCAAGTCACTCTTCGCTCTAAGCTCTAATCTGTATCGGCGCTGTGGAACACGGTTACCGAGTGGAAAAACTAAAGAGTCGTAATTTCCAATTGGTGCTTGCTGTGGGATTGCTCTAACTATAACTGTC
ASTF_00003145	XLOC_001611	373	237	0.7927	-0.511793	0.0453952	3	0	0	AAATCTTATTTTCTGACACCTCTTATGAATTTGCCGTGATTCATATTGCTATTAATAATATCTGATATAAAATTTTGAGAAGTAAACACTGTTACCACGTTAGTTTGTTGTTGAAGGCATGCCATCAGAAACAACAGCAACCAGGAGGTGACTCAACAACACGAGACGAATGATCAATCCGGCGACGGAGGCCACGAATAACAGACGTGTTTCGCAGCAAACGGGCCAACTTACAAGCTGAACGGGATTGATGTTGTATTACATTTCCAGGAGTCTTGCCAGGAGGAAGAACTGCAGCAATTAATGTACATTTTAAAACATTGAATGATTTTAATTCGTTTGTAATTAAATGAAGCAACATAACTATGTTCGG
ASTF_00003163	XLOC_001620	825	336	0.8352	-0.147821	0.14284	1	0	0	AGTACTTACTTGCATTATTCACAAAATGTACGAACAAAAAAAGATGGTTTAGTGTTTATTCGAGCAATTTAAGTATCATTTCAGTTGAAGCATGGCAATCGAACTTCAAAAACATTTAATTCCTTTCAGGTCACACCCGATGGGACTCGCTCGATTTTCTTTCGACTCCACAACCCATTCAGCTGTCCATCCACGTTCTCAGGTTTGGCCAGCATTGTTCTCGGTGTAAAATTGCAGTTAAAAGCACGGTAGCGTGCTGTTCCTCAACCTCAACTGAAAGCATTGCCAGGCGGCAATCGTTCATTCTAACCGCGGCAACACACACATACACACATACAATATGCGCGATGAAACAACGAATCGATCACCTGCCATCGGATATCCCCACTCCCAAGCAAG…
ASTF_00003195	XLOC_001631	820	321	0.8731	-0.523941	0.0632741	1	0	0	TACGGACGATCCGTTCCGTGTGTGTCTAGCTCCACATGTGTTAAGAGCTTGGGCGTGAGATTAGTTTTCCATCGGTTGTCCGCGCTTGTATTCGAGTGTGTTGCGTTGTTGAAATATTTTCCACCTAAAAACGACAGTTTTGGAAAATTGAAAGGTAAATTGCGAAGATAAACGATAGAATAGAATCTCGAGGCGAAATCAGCGTGCTTTTTGAGCAGTGTTAAGAGAAAACGAAACACCGTGCATCCTACATATCGCGTAGTGTACTGAAAGAGAAAGGAAAAGTGTGAGAGAGATAAAAAGAGAGTGAGAGAAAGAAAGAAATAAACCGTGTATACCGTGTATATGTGTGTTGTGTGGTGGCTGTTGTTTGAATATGTGAGCTTTTTGCAGGTAGTT…
ASTF_00003203	XLOC_001635	717	198	0.6155	-0.862574	0.00540237	1	0	0	CTTTATATTCGAAGTAGATGTAAGAAACACAGCGAAACATCAGTGTCACCTAGTAGAGGAGCAATGTGTAATAGCCGTTTATATAAATGTTCTGAACGGGTGAACCCGCCACTGTTCCACGTTTTGCACCAGATGGTAGAGATTTACGAGATAGCTCTGGGTTAAGACATGAGGAAAGGAAGGAAAGAAAAAAGCAAAAGCGGTGATTATTATGTAAAGAAAAACTCTGTAAATCCACTCCACTCGTGAGCAACAAACGCATGTTTCACTACTGTACCTTGCTGAGACTTAAATACTTCGATTGTGCTAGTGAGAGACGATATAGATAGGACAAAATAAGGAGATGTGTATATCGGTGCAGGAAGCAGTGAATGAGTAGCGAACGGAACGCACACAAAT…
ASTF_00003204	XLOC_001636	1118	195	1.0205	-0.86135	0.0102576	1	0	0	CTTTTCTCTCGGTGCACGTATTAGCGTTAGTTGCATTCCTTGCTTCCAGGCCCCGTTCTGCCCGTCCGGTTTTTTTTTTCACCCGGATCCCTTTTACGGGGTGAACGGGGTGCGATGACGACTCGCTAGGAGTGTAACCCCGCCGGGTGTAGCCATTGTTGTGCGTAGTGTGAAAAAAGTAGTCGTTCGAAAAGCATAGCAAATCAATGTAATTAATGTGTGTGTGTGTATGTGTATGTGTATTATGTACTTGTACATTTGGAAGTCATACGAAAAGAAGACACATTCTAAAAACCAGTCTCCCCCTTTGTATGAGGAACGGATGTGGACGAAAAAGGCGTCGGAAGGCAGGCAGGCAGGTAGAGCAGACAGAACGATCACCTAATTGTACTAATATAC…
ASTF_00003205	XLOC_001637	564	36	1.1967	-0.0536634	0.0579528	1	0	0	ACGTTCGAATCGCAGGAACCGTCGTACGCGCACACACACGGTTTCGCATCGGCCATCCGTTTTGCCGTCTTGTGGACACGCGCGTGTCGTTACTTCTGTCACGAGAAGAAAAACGGTAAGGGTCACGCAATTTCTTCGGCGTCTGTCCCTGTGTCTCGTCGTGATACAGCCTGGGACAGCTTCAGCCGCAAGCGCCCGCCGCTTTCCGCGTATGTTTTCGTCCTTCGCCGACGACCGAGGGGAATAGACGGTGTGTGAGTGCGCACGTGTGTGTGTGTGGTAGTGTTTGGTGTGCATGCGTACAAGGTTGCTTGTGTGTTGTGTGTAAAGTCGTCGTATTTGTCGCCGTCGTCATCGCGTAGCTCGTTCTCCCGCACACCGGTGGCGGTGGATAATAAG…
ASTF_00003207	XLOC_001639	879	87	0.7591	-0.274751	0.0100045	1	0	0	GGGAAGATGGGACGGTTGATGTTCGAGAACAGACGAAATTATTGGCGGTTCCACACAATTCTACTTGACTTGTTCGATTTTGGATAAAGATGTAAGTGAAGTGTGGCGCTCTTTGGCACTGTCAAAGATCGGCTAATTTAGGCACACTATTTAGAGGTTTTGCTGGATGACACTAGAGAGCTGATACTGTTGAGTTAAATTATTTAAAACCCGGCACTACTAACGAACTACTCGCCAAAACAGCATCCACACACAGGTACTGTTGAACACACCGCACCTTGGCAGAACACGTCGATTTTGTAGCTTACAACTAGTGTACTTCCTTCTAGCGCGTTTCTGTAAGTCACATAAGCTTCCACGAACTGAGCACAAGAACAAAAAACTACTAAAAAAAAGACG…
ASTF_00003208	XLOC_001640	382	108	0.763	-0.563835	0.0120003	1	0	0	AGTGTACTGTGTAGTTCGTTGCCTTGGAACGAGGGAGAAGATGTTGAGTTGAACATTTTCCTTTGTCATGTACAATTTCATGATGAAACATAGCTTGAATCCAATAATGCAAAGCTCTATGTGTAAAGGAGGAAAAACTGAACATAGCTACAAACAAAAGAGAAGAGACAGTTAATTGGACGTAACAACACAACAGCGAGACACAACCACCGACTGATTCCTCTTCGAAGGAAAGAAAACTAGCAGATCTAAACACAAGACAAACATTTTAAACGATGTCCATAAAACGTAGCACCAATGGAAAAAAAGTTGACAACTAAAATAGAGTAAGTAATAAAGTAGAAAGTTCCCCAACCGGGCCTTGCATCGCTGCAACGTTCGG
ASTF_00003210	XLOC_001642	678	90	0.9487	-0.264825	0.0239783	1	0	0	GCGAACGGTGGTGCGTGCGCGTCCGGCGTTGTTTCTTTTCCTTTTCGTTAGTTCAGCAAATCGTGCCCAAACTTTTGGAGTAAAAAGTAGTTATAAAAAAAGCGGAAAATCGCACCGTGCGGGTAGTTAGGTTGTCCAAAATTATTGTTTCCACTGTGCGTTGTGGATCAAAACGTTCGTTTATCGGTCAACTACGGCATAATAATACGATGGTGTTTCCTTGCGTTGCGTTAAATGCGTGTTGTTTGTAGTGTGTGATATGATTTTGTTTCGGGTTGTTCGGTTCGCGGTTCGCTGGTGTGAATGAAGAGCCTTCTCAAAGCTAAACGTGCTTCCAAATTGTGAAATTGCTTCACCGCCAAGCCACCCGAGAGTGCGGTGGAAAAAGCCTTGGCAATC…
ASTF_00003211	XLOC_001643	698	237	0.4333	-0.37612	0.0142289	1	0	0	AATATATATATATCATTGTGTTCCATTTATAAGTATGTTTATGCATAGTACTTTCATCACCCAAAATGTTTCCCTTCTTCTCGCTTCCTCTTTCCCACTTTCCTAACTGCCCTTTTCCGCCCTGCTAGCCTTTACAGCCGAAAAAACATGGGATCCATCCCCCCCGTTTCCCCTCAAATGCTGCTGCTGTGTACCTTTGATTTAGTAGCGAAATATTTGTCTCTAATCCTTTCCTCGTCCACCACCATTACGCATCATGCTCTCTCTCTCTCCCACAGAAACGCTAATCTAGGCAGGTATTCGGTGCGATTTTTCTTTTTATCAAAATTATTCAAGCTTCCTCTCGGCCGTCCTTGTTGTATTTGTGTGCGTAAATGTGAGTGATTCGTTCCACTTTCC…
ASTF_00003212	XLOC_001644	837	183	0.577	-0.616735	0.00641139	1	0	0	CGTGTATGTTACTAGTTGGTTTTAGCTATTATTATAATAATTCGCTCGCTATTCGATTATTGTGTTCGCAAGTACGTTGAGAAGCTTTTGTATAAAACGTTGCCCTCCATTTTAAGTTCCTACACATTTCGACCTTGCGAGAAAGAGTGAGCGGCTGGGTGGTCGTGGGTATTGCTGAACTTCTTCGCCCACCTTCTTCTTCCTCCTTCGAATGGTAAAAACTTACTAAGATTGGTTGGTTGGTTGGTTGGTTCTGCAGAAAACTTTCATTGCCTTTTGCTCGCCTTACTGTACAAAACCCCTAACTGCTTCCGGTTTCTCTAATCGATGGGATGTGAAAAAGTTACTCTTGCTGGTCTCTTTCTGGTCTTGCTGGTCGCACGGAGCTTGAAGCTGGAG…
ASTF_00003213	XLOC_001645	845	231	0.5167	-0.241046	0.0194459	1	0	0	GTGTTGTGCTGTGACGAGCACACAAAAAAAGTAATTAAAAGACACACACACACACACACCCCGGGCACGTTGTTGCGAGAAGATTGTATCCCGAGTGAAAACAGAAGCCCTCGATTGTGTGTTGCACGAAAGGGTGATGACGTTGACAGAAACGCGTCTTATTTGCCGCTTCGATTTCGCAGTCATGAAATTGAGGTTATGCAACGAGGCTCGTCGCGTGTCTCATTACTGTGGAGGGTCAAACCCTACGGGGGAAGGAGGTTTGTTAACAACTCGCTCTTATCCTGACCGGACGAACGATCAAGTACGGAGGCGCAAAACTGGAAAAGCAGCAGCAGGAGTAGGCGCAAAGGAGTGTCGACCATGACCTATTATGGATGGTAAGGGTGAGCAGCGCAT…
ASTF_00003214	XLOC_001646	486	135	1.0004	-0.166504	0.0652627	1	0	0	AGGCGAGATGAGTTCCGAATTGAAAACACACACGCACTCGCGGCCCCTGGCTACCACATGCGACAACGGCTGCAGTTAATCAGCTACCGAAACTTCAAACGGGACGTTACTTGGCAAAGGGGTTGTATATTCAAACAATGCGCCTCATCCACGTTCGGTCACTTGGAATGGGAACCCTTTGCGTCGAGCTGACACCGAATACACTGACTGATAAAATCACTGAGTTTTATAGCACTTTCCGATAAGAGATAATGCCCGACAATGTATCACCGTTTGCCAGTAAATATTTTGCACTCAATTTAACACACTTTCAGCTCAATTTCTTCTCTTCATTTATATCGACAAACGCTGTTATTTTCTCCCCTTTTTTCAATCCACCATAAAAAAAAACACAAGCCG…
ASTF_00003218	XLOC_001650	493	90	0.6341	-0.396904	0.00892429	1	0	0	CCCCATTGGACAACCTTAACTTTTGCCAGGCTGGAGCGGACCATTTGTGCAATATTTTTTCATATCGCACCACATCTATGTAGGTGGGGAGGGCCGCCACAATTCCATCGAAAAACACCACACACCAGATGCAGACGCAGGCCTTGATTTTGCTCACTTTTCGACTACAATTCCTTTCGATAGCAACACCCACGCACTGCTGCAGGATTGAATGATTCGCACGTACCTGATTGGAAGGGTTGCAGACGGTTTATCGTACAGAATTTTACGGAAAAAGGTTTGCGATACAAGAATCGCGTAAGGCACCACGGTCAGCACTCACAAAACACCACGAACAGACAGAGACTAATACGGCAGGTAGCACAATCGCGTTCCGGAGTTGTGCGGCACCAGAATTTC…
ASTF_00003221	XLOC_001653	457	252	0.7632	-0.193508	0.086169	1	0	0	TCAGGGGGGGTTCTGGTTCAGCACGGAAACGGATTGTCACATTTTCGCTGTTCCCACTGAGATACATTCTGAGGTCATGTCCTGTTTTAACCAACACCGGCCACCGACGGAAAATCCACCGAGATAAACAATTGTTCTTCACACCACATTCGGTCATCGATAATTATACTCCGCGCTATCCACTGTGAATGCACCTAACCTAATCATGACATTCTTTCTTCAAGTGTCCTCTTCTTTTTTCTCTCACACACACACACACTCGCGATACACGAATACACCAGGATTTTGTGTTCTTCTTCTGGGCAAGCGATCCAACGCGAAAAGGTGGATGGTGCAGTCATTGCACTTTTGGAAGATCACCAGCCGAACGGCTACGCTATCTCACGGTGAGAAGCATCA…
ASTF_00003222	XLOC_001654	1283	135	0.7328	-0.588646	0.00392125	1	0	0	GTCGACGCTGCTCTGGGCTGCACTTTTCTCGCACTTCAACCCAGCCAAAAGGTCCAATGGAATTTGCGGCCGTGAACAGGAAGAAGGTGGCGCCGAAGAAGAACAAGCTAACGAGTCGAGTTGAAACATCGTCGGCGTAAATTTGGCATAGCCTGCTGGTGTTTGTGTCGAGTGTGCGTGTGTATTGTGTACAGTGCGCGTCGTGTGGCAAGTGCGCGACGGAGGCTCGTACCACAGGTGAAAGAAACAGTTGCAACAAACAACACGAACAACAGGGCAAAGAAAAGCGCACTCACCCGCTCCAACAAGAAGACGGCGCATCGAAGTTGAACATAAAGTACAGTTAAAAGACGATTCCACACATTACACAGTCACCGCATACCGTGTGTCCGAGAGAAA…
ASTF_00003223	XLOC_001655	857	84	0.9378	0.250249	0.056561	1	0	0	CCTTCGCACGGGAACAAAGGAGGTTAAAATAGGGAAGGTTTAATACTCGAACGGGATAGTCATAAGGTGGCTCTTAAGGATTGTCAATCGAAATGCATACTTTGAGGCGAATTCATCATCCACAGGTGCTTCATTTAATCCATGCATCATTTGCTGGATAATCCCACATAAGAGCTCTCGTAAGAAAGATTTCACCAGCAGAATGCTCTTCTTCCCAACGATTACTCCACCCCCTAAGAACTGACGCTTAAAGCCCCACATTGACGACGGGAATCTGTCAATGTTCGAACGACAGTGATCGATGGGGCCCTCTGTCGGAAAACGTCAGCACCAAGCGCGCTACTCCCTCTACGTCTACGCCTGCCAGGTTCCTTCCACCAGATGATTGGATTATTGCTT…
ASTF_00003224	XLOC_001656	788	249	0.778	-0.521521	0.0274642	1	0	0	CACTCGTCATACAAGTGCTCGAATCCGCATGCAACGTCCTAATTTTGTGTCACAAGCCCGCCGGCCATACAAAATTGAGGACGTTTTTACATGGGCTGAGGACATTCTGAGGACGTTCGGATTCGGGCTTATGGGGTGGTGTGCGTGAGCGTTTGCGCTCCAGGGGTATACATGTGTGTGTGATCACGCTGTTTGTATGTATTGTGATATGTGTTTTCTTTCGCCTTGCCACTATTTGCTTCACAAACAAAACAGCTCTTTTTTAAATCATTTATTAAAAGAGGCTTTGGCCCTCAGAGACCTCATCCGCCTCTTTAAACACTCCGATAGTATCCGATGCCGGCTCCGAAACACATCCGGAAGCTTCCTACGCCGGCTCCGAAAGAGAGCCAAAGGCTT…
ASTF_00003227	XLOC_001659	573	192	0.7774	-0.112779	0.056524	1	0	0	GCTCCACTTAAGTTTGCCGTCAGAGCATAAGTGCAATTCCGTGTGTGTAGATGGGAAGTTTTTCCACCACGATGAGCTTTATTTGTTAACTTTTGAAAGCTTATCTGATTGACCGCCCTACGCCAAATTCAGCTTCTGCTCCTGATGTGTCCCTTTTACGTCTACAGATGACAGATACGGGGCATTCGACTTTCGACACACGAAATAGGCCGTCTGGGTCTGAGATTAATTGCTGCTTGCTGTTCTAAGACACCGTCACTCCATTCTCTTCAAAAGAACGGCTCTCAGCTCAGGTGTCAATCGCAACAGCCAACAGTGGATGGTGTCTGGAGGCCAATGTTTGCACACTGTCGAGCCTTTGTCTCGCTCTGTCGACTGTGGAGCATCACGATGCGAAAA…
ASTF_00003228	XLOC_001660	461	291	0.8105	-0.344002	0.0965008	1	0	0	TGAAGACACGACACGTTAATGTATCGATTATTTGGGTTCGGTTGTTTGGTGGGTCGGTTGTTTCGTTTTTTATGTCCTCGTCGCTCGTTGTTATTATTGCTCACTTCACCTTGGCCCTTAGTGGTGCTTGCTTTTACCGGGCATCCATGTGAGTGGTGGTGTATTTTGCGCGCCTCCGTGGAAAAGGAAAGAGTGCAAGCGAGAAGGAAGGATATGCAAATGTTCGCGTGCCAGCGGAAAACCTTTGGCAAGAGGCTCTGGAAATCAAACCAGCTGTGCCTGTTTGGCCCGGCAAAACCCCTTCTCTAGCGGGGTGGTGGGAATTCGCGTGCGCGTTGGAAAAGCTCGCATAAATTGTGCCTCCACCTGCCGCTTGCTGGGAGCATATGAGCGATGGAG…
ASTF_00003230	XLOC_001662	293	51	0.7787	-0.351167	0.0141443	1	0	0	TCGGGAACTGCCTGTAAATTTTTTTTCGTACCATCGAGCATACTCAACCTGTGTAGCAAAAGAACCAGTGCAGATATTTTACACCGCTTGTTTGCGGTAAAATTGTTTACTAAGTTGTGCAAGTGAATCGTTGAGTGGTACAAAATCAGTTGTGTGCTGCAGGTTAGTGACTGTTCCGTGCAGTGTAAAGTGGTGAAGCAAAATCTGTGACCGATTGTAGTTTATCCTAATTTTTCGTGAATGTATCGGATCTTTCTAACGGAAGCGTATGCCGCTAAACTTACACACGCAAT
ASTF_00003234	XLOC_001666	673	135	0.999	-0.168576	0.0510094	1	0	0	GTCTGCTTGAAGAATGCAGGATCGAAAATTTGCAAATCAATTATAACCCCGCTCCATCCCACGACGATATATGATGTGAGTGCGTGTGCGACAAATGGTGGCCATGGTTAACGATTGTTAAACTATTTGTTGCTCTTCACGAATGAAACAGACATTGGGACGTGTTAGGTGTTCGGGAATGTCCGGTAGAGAATACATGTATTATGACGACAATGGCAATAAATGTGAAAATAGGTAAGGACAAGACATATATGACAGAAGAATACGGCCACACACAGCCGCAGCAGCTACCAACGATAGGAATGTATTCATTATTGATGGCGGATAATCACACCTAACCCTGCTAGAGAGAGGAGACCCACAATTGCATTTTCCTGCAAGTGCATCCCCCCGGAGAGA…
ASTF_00003235	XLOC_001667	556	141	0.6945	-0.106791	0.0299841	1	0	0	ACAAAAAAGTATATTTTAGAGTTTAGGGCGATCGAAAATCTTTACACAGGCACGCGAAACGTAGATGTGGGTATATATCGGCCCGATGATATTCTTACACCAGAGCTCGCAGATAACAACCATGCAGGAGGAAGAAGGTAGAAGAGTGTGTGATGCTAGTCGCGGCACATCTTGACCCTTTCGTTTGACGAGGAACGAGGACTATTACACGGGGGGAAGGATTCGTTCGGCAAGGATCGTTTAGTACAGTTCACGTTTGTTTCATTCGGTTCGCCATGAATGAACTGCATTTTGTGTGTGCAATTATGCGCTTCCAGGTAAAAAAAACTACACTCTCTCACTCTCTATCTAATTAAACACGTGCACATGAGAATAGTCAATTTATATAGCCACAGTGGA…
ASTF_00003237	XLOC_001669	215	30	0.8442	-0.680965	0.00732205	1	0	0	TGTCCTTAACCTCACTTTTGCGCCTTCAGTGATCTTCTTCTGCTCCAATCGAAACACACGCCGTTTTTATGTACTTTGCGCAAAATTTTCACAACTAACCCAATCACAAGCTTACTATGCACAGTTATTAGACTTATTAACAGGATTTTACACTACAATACTTCTAAAACACTGAAAATAACAGGATTAATCGAAACTGCTGTACGATTCACGTG
ASTF_00003248	XLOC_001675	7769	318	0.5792	-0.605966	1.89602e-06	3	0	0	GAGAGAGAGAGAGAGCAAATCAATCACCATCTTATTTCATAATGTCGTGCGGCCACAGTGCTGCGGCATGTTGCGCGCCGACGGTGGTGTCTCCTATGCGTGTTCGTGTGTGTGTGTGTGTGTTTGATTGTTTGCTTGTTGGTTGTTTTTATTTCTTAAAGTAAGACCAACGGTCCTAACCAAATGACAGCTAAAAAGCCAGTAGCTTAAACGTTGGAGCTGGGGAGACACGCTCACGCTTGCTCATGCTTTTTTTTCCAACTTAGACTAAAGCACAAGCAGCGCAAATCAGACGGCTCGGTGCATCCGTGTCGTGTACCTCTCGCCAGAAGGTATGTCTCTATGTTGTTTTAACTTTAACTACGTTTACTGTTTACTGCTCGGTTTTACGGCGCCCCT…
ASTF_00003252	XLOC_001678	2791	192	0.7787	-0.364367	0.00165716	4	0	0	GCAGGTGTGTACGTGCGGTGGATACGCCAAAAGTGTAGCAAATGAACAGGGCGCCGAAACCGGAATTGTCGCTGCTGCTAGTTCAAGTTCCTGGCAGCTTCGGTGTGCAGCTGCAGCAGTGAGAGTGCACTCTGGGTTTTGGGTCGCAAGCAGCAGCTTACGCGTCTCCCCACGACGAGCAGGTCGTGGAGCAAAAAAGGAAAAGGGAGCGAGAAAAAAAAAACGTATCGTGAAAAACGGGCAGCCCACCACCCCCTCGGATTTTGGTGGAGAACGTAACGGTATGCGTACGCGCGCATAAGTGCTGTATGTGTGTGAAGTAGTGGTAGTAGTAGGCGCTGCTCGGAATGATTGGCGTTCAGGTTTTCGTCAATTCCATCCACGGAGACGCAAAGGCAA…
ASTF_00003262	XLOC_001682	681	132	0.8577	-0.399249	0.0192774	2	0	0	CGTCCAGTGTGTGTCTGTCAGCTGCGTTCCGTTCACGTGCGTGTCAGCTTGTATGTGTGCAGCGTGTTGTAGGCAGGCAGTTCGGTTTTTACGGGTGTGAAGTTTGGTGTGATTTTTGTCAGTGAAAGTGAAGTTTAAGTGAAGTCTGCGAGTGAGGGAGAGTGAGCTAAGCGTGGCTTTAGGATAGCCAACGTTCGAGTGTGGTGATCCGGTTGATCGATACAAGCGAGCAAAGCCGGTCATTAACAGGATAATCTGGTGCGTCGCAGGTGATTTGAATGAATTTCCCGGTCTTGAAGGATTCCGTTGCAGCGTTTTGTTGCGTCGTCCTCACACAGTCGGTTGAAGGTGTTTTATTGTGTGTGGGGTGCGCACTAATTAAATTAGTGAGAAGTGAGC…
ASTF_00003291	XLOC_001696	924	72	1.184	-0.106094	0.0423625	4	0	0	GTCGGGTGTGTATTTGGTGCCGTGGTCCGCTACGCGACGGCAGACAGAGAAATACAAATCAGTGTAGAAACTTGAAGTGTACGGATTATCTTCGGTAAAATCGATCGGCAATCGCTCGCCACCAAACGCCGCTATTGGGTTTTCTTCCTGCTGATACTTGGCAAGAAGAAGGAAAAATAAAATAGTGATGCAATAAGCGAAATAAAGTAGCGGAGAAAGAATTGTGCACTTGGTTCTGTGGGTGTATGTGAGAATAGAAGTAACAGAAAAAAACACGCATCAGTGTGTTGGAGGAAATCTCTCATCGCATCTGCTACATAACCGATAACGATCTTCGAAAAGCAAGAAAAAATAACGTGTAGAAGTAAACTAGCAATAAAGTGTGTGCGAATTACGCTT…
ASTF_00003300	XLOC_001702	356	96	0.8983	0.170273	0.0879282	1	0	0	GTTTAATTTTGCATTCTAGTGAGAGGACAAAAAAAGGCGGAAATTAAATACATAAAAGGCACAGACAAATTGAACGAGCTCGTCGTCGTTTGATCCTGACGCAAAGAGCGATAATTAAACAAGTGGAAAATGACGTTAAAGTGTTGAACGCATTAGCAGAATGCTTGGAATCGGCAAACCGGGGGCACCCATGGATATAGTGGCGACAGTGCCGATGTGTGCGGGAACCGAGGTTTGTCGAATCGATCGCTTCTGATGACGGAGTGCTATTAAAGTGTCTCTCTGTGTGTATGTGTGTGTGTGTGGGCCCGTGTGGAAGGAAAATCACAACGTTCAACAGAAGCTATCAAACCGGA
ASTF_00003310	XLOC_001709	505	153	0.5172	0.227982	0.0456821	2	0	0	TGTAAAGAGACGTAAACATACGTCCCATCTCGACTGTAAAGTGTAAGTTTGCCACTGCCGTTGTGAAGTGTAATCCTTGGAAGGATTCACCATAGCCGCAGTAATGTCCCAAAGGCGTTAAAACGCCCGCAAACCAGTGGAAATGTGTGAAGGAAATCGTGAAATTGGTGTGTTTTGCTCCACCGTGCGACGTTAGATGGTGTGCGTGCGGGGTTTCACCGAGTGGGACAGCAAGATGTAATTTGGAGCAACGCATCGACTCCTGCAGGGATGGGGAACCGGAGAACGCACGGCCGATGACGTCACAGCAGCACGCGGCGACATCCCCCATTCACTTTTCACCATGATAGATGCTGGCTAGCGAAGCGGAGCACAAACACCCACCACCCTTCTTTGATC…
ASTF_00003375	XLOC_001739	948	123	1.0727	0.381401	0.132582	2	0	0	GTGTGTCTTCCACCGCTCGGATGCAATCCTTCGAAGAGGAAGAAAAGGCCCCTATTTGATTTGTGTGTTGCATGACGGTGCATGAAAAAGGTGCTCCTGGGAACGACATTGGTGCGCGCCTGCTCGCATCCATGCTGTGTGTGCGTGTGCCTGTACAAGCTTAACATAGCATATAGCGAAGCCGAGCAGCTGCTCTACGTGTGAGTGTGTGCGCAGCGTCTGTGTCCTGTAGCTGTGTGCGTGTTAAATACCGGAAAACGGAAAGCAGAATCTTGTAGTGAGAAGAAACACAGTGCACAAAAAATTCTTCTGTGTCACACAAAAGATACTTATCTCGCGAGGCAGTTTCAAGGCCATCTAGCGTGCGCGGCTACTCCGACGTGTATTGCCAATCGGTCC…
ASTF_00003415	XLOC_001755	1644	141	0.7612	-0.545121	0.00306771	1	0	0	NNTGAGGGAAGCATCGTAGCGCCATCGTTCTCTGGAACAACTATAGCTTAAAAGGATAAGATCCTCAGAACCAATACACACACCACACAGACACATGAAGGACCTATATTGATGAAACCTTTGGCCAAAAAAGCGAGTATTTTTGTAGGGTGGTTGGAGGAAGAATTTAGTTTTTTGGGCTCCACTGGTTTGGTGTGGGTGGGGTCACACATCGTATATAGGAGATAGAGAGCCATAGAGAGTCGCATATTTCGTCACACTTATATACGTAGCGATTTTCCGCCTAGTAGGTCCATTTGGCGTTGATGATCAGGGAAAAAGGAAGGTCGTGATGGTGGACACACGATTAATCTGTTATTGACGTACAACACTGCTATCGTTTGTATGTCGATTGATTCA…
ASTF_00003436	XLOC_001768	1034	144	0.8467	-0.130063	0.0242355	1	0	0	TTCGGTGGTCGTTGTTCTCCTTTTTGTTTTGTTCTTGTTTGCGGAAAACCCCTTTTTTCCTAAAACATGCCATTGACCAGCGCCAAAAAGGTCATACTGAATTACACTGGCAGAATGAAGTACCTAATCAAAATTCCCGGTTTTACGTCAAACGCTAAGGAATCATGCAACAGAAAAGCGCTATGGGAGAGCAAAAATACATTCCAATAGTCGAATACCGCACATCCGATGCTGAGCTACAAATTTTGAGGACTCACACAAGCGCCAAGGGATAGTAGCGTAAGTGCCAACAGATGAATACGTTTCTTTCCTATTCGTTTCCATCTCAGGCACATCATAAATAGAATCATAACACAATTAATTGTGTCGCGACGGCGAAAGTTAGACTGGGTTGAAGAG…
ASTF_00003437	XLOC_001769	1720	267	0.8112	-0.839753	0.00486793	1	0	0	ATTTAGGTTTTGTTCGGTTCGTGGAACGAAACACTGTCCACTTGAGACGAGATGAAACAAAAGAGTTGATAACGAGAGAGAGCGAGTGTATTTGTGAAAGTAAGCTGTAAGTAGAATGGATTAGAACAAAATGGATTATAGAAAGCCGATAGCCGTGTGGAAAAACTAAAGAAAAAAAAACCCGCGAAAGGATCACATACACAAATTTGACAATAAAAATATTAAATCGTTTTTAAAAGAAAACAATGCAAACTATTTGTCCGTAGGTAATATTGAGCGAGAGAGTGAGTGAGTGAGTGTGTGAGAATAATGTGAGAGCGAAAAAGAGCTGTTGGTTATTGATTTATCATGTTCCTCTTCCTTTTCTCGCTTTCCATACTGCTTCATTTTAGCGATAGA…
ASTF_00003441	XLOC_001772	1612	225	0.9393	-0.537175	0.011585	1	0	0	GTAGACAAGTCGGCTCTCGATAGCGTGAGTAAAATGAAATGAAATTAAGGGGGCAATCAAAAACATTGGGGGCAACAGCATTCACAGAGCAATTCAAAGCCTGCTCTCTCTCTCTCTCTCTCTCTCTGTCTCTCTGTCTCCCTGGCTTGTGCGTCCTTAGCATATTCCTTGTCGCTTAAATTTGTTTTAAAAATACCCGGAAGCTTTCATTCGAGGTGATTCTGTGCCGCTGTTTTTCTGATTCTGTTTCCTGAAACAAATTATTGTACGTTAATGTATCGGTTTACCGGTCGGAAAACGCAATTCACACTTCCTTTTGATCGCTGTGTCGGGGCTGCTAGCGATAATCACTCTTCTTACTGGCATGCAATTAACGGTCGGTCCCTTCCTTCCGTCGCT…
ASTF_00003442	XLOC_001773	2476	267	0.5609	-0.463739	0.00202718	1	0	0	GGAGAGTTGCCGGTTAGCTTGGTCGTTTTACTTTTTCTCTTTACAACAGTCTTGAACACTTCGAGCCTTGGTTTTCGAAATTTAAGCACCTCCATCCAAACGCGAATGTGTGTAACATCCCCACTTGACAGTTTGCTATAATGCTATAAAACATAAGCACAAACCAATGCTGGACCCCGCTGGTTACGCCTTAGTACACGTGCGCCAAAACCAATAAGAGAAACAAGCCAAAACACAGGCGCGCATTTCACCGAAAAGTAGTCACCTGCATTCGTATCGGAGCGCGCGTGGTGTGCTGGACGGTACCAATCAATAATAGTATATTATCACAGGGAAACCGGTAAACCTGCCGGCATCCTTTTTGCCGAACAGTGTCGCACACGTGCGGTTAGTATATGC…
ASTF_00003468	XLOC_001787	2030	132	1.1232	-0.538912	0.00503014	1	0	0	GGTCCAAAATATCGTCCTCTTGTGAAATTATTCGACAAAACTAGAACTTCGACCACCGTTTGGTTGGTATACCCTGCACTACTGCTGCTACTATTACTATTACAGAGAAAGATCGCTAGCTACGTGGCTAGATTGTTGCTGTGCCATTTGTTTAAATAATTAAGCTGCACTGCAGAGAGAGAGAGAGAGAGCAATAGTACATCCCCTTCAAGTAAGCACAGTTAAACACAGGGTGTTAGTCATGATCAGTTAGGGATATTCTGATTACACTATTATACTACTACTAAATGGCACGCACCAGCACAACGTTCGTGTAATGAGTTGAAATAGCATTGTCAAAGCCGCCCTCCATAGTGAGCAGTACAACAATTGAATCGTGTCCACAACCCAACAGATTAT…
ASTF_00003471	XLOC_001789	473	78	0.5335	-0.393112	0.00617552	2	0	0	TGCACATGCATTTGCCTGAAATAGATTTACAAAGCTTCGGAAGCTTCAACCAATCTAGCAATCAATTTGACATTATTCACTAACCTCCGCCGGTTGTGATAAGCACGGCAGGTACGGCCATAGTTAGTTTTCCACGCCTTTACACCAAATCATGAGAACCGGCCGTGTACTGCTGGTGTGAGCAGTGCGTGTAGTAGTTGTGGGTTGGCGGGAAAAAGTGTAGTGTATGTGAGCCATCATCGTTCCAGCTACTAGTGCGCCACCACCTGTTTTGCGGCACGTTGCGCTTGCACACGTTGCGCCCTCTGTTCACTGTCCCTGGAGCTTGGTGGGGGAAACGATTGCATAAACGCACTCAACTCCCCAACACGGCCGCTGCCAGCAAGTGCTCCCTTAAGC…
ASTF_00003478	XLOC_001792	513	129	0.834	0.183987	0.0817238	2	0	0	GGTGGGTGTGCGCGTACATCGTCCATCCGGGAGAGTTCTTCTTGCAACAATTTTGCACCTTTCCCGTTGAACCATTTGCACTGCCAAAGTTTCCTGCGGACTGCTGGAAACCACAAATCGGGGGAGCAAAAAAGTGCAGCAGTTTGACCGTTTTGTGTGTTGTGAAGTGTTGTTAAATTAAGAAACCAAAGTTCAGCCAAAGCAATCTGGGCAGCAAGCGGGTAAGCGGCTGCCGAGTGTTGGTCGACTAATTCCGAGAGGTTTCACCGCCGAGAGACCTCATCATCAGACCTGGTCGAATTTGGAGTGTGTGTGTGTGTGTGTGTGTGTGTGGGGCGCATCAGCGATAGAAAGTGGCAATCGATGCAATCGTGCGGAAAGAAATGAAAATGTTTAGCG…
ASTF_00003488	XLOC_001797	992	249	0.9055	-0.333108	0.046748	2	0	0	TTCGGTCGCTATAGAGTGGTGCGCGTTCCTTCAGCAGACGTTCACGGCCATTGTGGGTGCTTGCAAAATCGGGCTGAGGGCTCGCAATCGAAACGAAACTGAACGACGCCGAATCGAAGTAACGCTCCGTGGTCAATGCTACACTCGCCGGGTGCGTGAGTATCGATGAATTTTAAACGACATTCCCACTGTCGATGCAGCTGATCGTGCAATTATGATCGTGGTGTGGTGGTTCGTGCCAACATTTCATGTGTGTGCGCCTGTGTGTAGGTGAAGTGTAAACAACGGTCCGTGTGTCCCGCGTGTGTGTGTGGAGGCTGCCGTTGGGAGGGTTCGGTGTAATTCTTGCAACTCCGGCCCGATTCATCGCGCCCGCTGCAATAGTGCAATAAATTCCGC…
ASTF_00003503	XLOC_001807	1565	162	0.4743	-0.212605	0.00382605	2	0	0	TGATCTTGGTGATGAGCGAAGACAGTCGATTGATTTCGATGGAAAGGTTCGCCTTTGGCGAGTGTCTTCCTCGATTCGACGGCTAGGACCGAACGAAAGCAGCATATGACGCCAGCGCACGGAAGCGATGCCCGAATCTAATGGCCGGGTGATGTTCAACAGAGCAAGCAGTGTGCGTCAGACTCTTATGACCCAATCGGTCGAAAACTCCCGACCCTTTGGGAGCGGTGACGTAAGGGCCTCGGTACCGATGACACGTAGCAGCTACAATTACGCATCCTCCTCATCCTCGCCCGCATCAGCCGCACCCATGACACACGCTTCCGTGCCTCCTTTAGCTACAGGTAGACCATTAGTGCCCAACGGTGCCGCGACTGGGCTGGCATCGTCCATGTCTAG…
ASTF_00003511	XLOC_001808	455	141	0.8408	-0.630685	0.0156252	2	0	0	AGTGTGTGGATGTCGGTCGCGTTCGTGTGTGCTTTTTTTCTGCCGCTTCTCACCCATCGGACACCGTTTGTAACGCGGTTCCGAATTTCCATTGTTATCGGAGTGAGCTTTTATAGTGCGTTTTTGCGTTTTTTTTTGTTTATGCAATCACAATCAAATGGGCCCTGCTGTCCCATTCGAATCAGCTGCTTTTCCAGAAAAGTGTGGACGACGTTCTAGTAATATTTTGTTTTTTGGAAAAAAGAATATTCATCCATCGCAGTGTGTGTTTGTGTGTATGTGAGAGTGTTGTCCACATGTGAGGGAAAATTGTAAGCTTCGTTTAAAAAAAGGCAACCCCCCCGCCCCCCATCCATTCGGAAAACGTGTGTGCTTGAAATTGAAGGAAATTTGGTGAAC…
ASTF_00003518	XLOC_001810	1144	183	0.9131	-0.00148535	0.047603	2	0	0	AAGAAGAGAGCGAGAGAGAGAGAGAGAGAGAGAGAGAGAGATAACGAACGAAACAGCTAATAAGAAAACTCGTAAACGTAAACGTGTGTTGCTACTTATAGTTTTCCAGTTTAGCATTCCAATTGCCGTTTTTACCCTTTCAAAAGGGGGAAATTGTTTGTTTGCCAATTTATAATCTGATTTGAAACCTAATCATGGTGGTATTTTTTTCCATATTGCCGCCATATTGCCTGCTTCTTAGTTCCCTTCGTTAGGATACTTGCTTTTCCAAAACTCTTTATCACATGCATGATCGTTGACTGTTTGTTGTACTATCTCCCTTCTCGATTGTTCGGTTGACAGTTTGCACGAGGACGATTGACAGCTCAGCAGTAACTTAGTAGCCCTTGACTTTGCGAG…
ASTF_00003581	XLOC_001843	2012	465	1.0023	0.0922581	0.234042	1	0	0	AGGGCTTCGTCAGTTTTGGACAGAGTCCATGTCTCAGACTATACTGGGTGTACTGGGACTATAAATGTTCTGTACAGTCCCCGCTTCGTCCGTCGCGACAGGCTAGATTAGCTCTAGCCGCATGAGGGGTCAGAGCATCTGGGAGAATCCACTCAAGTAGTGCTGGATGATCATTCCGGGCAGCCTGAGTGTACTTACTATCGGCTAGGATTTTCAGTACCGATATCCCAGGAGCGGGGAGAGTCTCATATACCCAACGGTTATTATGGCTTACTCGCCCAAACGTACCGCGGGAGCCAGCTACAGCTAGGCTAGTGGGATGCAATCTCAACCAGGTCTGAGAGTCTTCATGGTAACGCACATTACCGATACCATTAAGGTAGGCTCCCAGATCGACCG…
ASTF_00003588	XLOC_001846	2102	318	0.7036	-0.134736	0.0173343	3	0	0	TACGGAAGTTGCAGTAAGCGGCAACAGCAGCAGCAGCACCACCAGCAGCAGCACTAGCAGCAGCGGCACCATCAGCACCACCAGCAGCAGCAACAACAACAGCAGCAACAACAACAGCAGCAGAAGCAGCACTGCCCGAGACCTATCGATATACCAGCGCCGACACGGGCGCGTTAAACGATCATTCGAACTCGATCGAACGAGAACGCTTCGCCGAGCTACGCTGTCCGAGGTTTACGAGTCGAGCGTACAAGTAACCGTGTGTCCCGGTATTACCGATGCGCCAAGGCCTACTACAACTGAACCAAAATCCCTCAACGCGTGGTAGTTCAGTTTCGGCAATAGCTGTGAGATTTGTGAGATTTTGCGGCAGAGCAGCTGACACGAGTCACAGTGTGA…
ASTF_00003587	XLOC_001847	1206	201	0.64	-0.663111	0.00494882	1	0	0	CTTTTGTTCGATTGAAGTGCTTTTCATTGTCCCTGGAAGTTAATCATGTCGCAGAAGTTATGTTTCGACCTTCAAAATTGCAGAAAAAAAACAAACTTACGTTCCTTACACGCGTTCGTGATGTTGCGCCAGTGCCACCCAGCCAAACTTATGTTGTTAACATCCAACCCTTCACTCTCTCTCACTCTCTCTCTTATAATCACCCTCTCTTGTCATCAAGCTGTCAATCAGGCAGGACCAAACCCATCCAGCTCAACGCGCAGGAGTGTGTTAAACTCGGACACTAAAGAAGATATGTTTTGGCCCCCAAAAATGAAAACGACAGACACACACACAAACACACACACATGAACACACATATTTACAGTGATCCTCGATTATGGATTGTTTCGACAAAGA…
ASTF_00003601	XLOC_001855	595	75	0.5822	-0.570031	0.0038901	1	0	0	CATTGCATATACACGTAACCGTAAACAACCATAGAAATAATACTATACCTGTAAACGTATACAACGGCAGAGACAGAGAGAGAGAGAGAGAGAGAGAGAGAGAAAGAGAGAAGGAAGGAGCAATCAAAAAACCACTACCATGTATTTATCTGTTTACAGGGTTTCTCGGGTCATAAGACAAGTGTTTCGATGTTCATATATGGCGTAGATTGCTTGGATTTTGTGTTGTTTCGAAATTCAAACATGAAGACACTTGTTTTATGACCGGCGAAACACTGTGCCTCGCTCTATAGGCGACCGATGCTAAGGTAACGAATATTCAAAAGACCTGTGAAAGATCAGCTCCACAGTAAGTAATAAGTAAAAAGTCGTCTCGCTGTTATAATCGCATCATAATCA…
ASTF_00003602	XLOC_001856	622	198	0.9222	-0.141252	0.0785351	1	0	0	CCTTCTCGCTCTAGCAGAAACAGAGTCTGTCTCACTCTCTCACCATCGTTCTCCTGTTCGGTGCGGAGCAGTGCAGAACACGTAGTGTAGGCCATAAATGTAAGGCTCCACCAGCGCGGTTTCTCTCGGCTAACCGGCCCCGGGATAGCCGCGCTGGACAGCCGAACACCTGTACACACTGAGTACACGCACGCAGTATTATCAGGATGACAATCAGCAGTTGTTTCATCCTCCCTTTCTGGTAGTGTATCCTTCCCAAACGTAATGCGAATGTTTGCTCGCGTAGCGCTATGGTGTAGTTGTGTTAATATAAAGAGGAGCTCTAAACAAAGATAGCTAACGCAAAAACGCAACCCTCTACACTATGCAGAGATACTGTTGAGACTCGTATATTATAAA…
ASTF_00003623	XLOC_001867	873	144	1.2424	0.0918855	0.145624	3	0	0	TCCCATCGGTGTTGTTCGGTCCGTTCGGTCCAGCCACTCCAGCCCATTTGCCGGCGTAGCGCCAATTAACCTTGAGCCGTATCTTCCCACCAAGTGCCCCGGGGCCTAGGCCGTACTCCCATGTCCAAAGCGGGGGTTAGTTAAAACAGTTTTATTAAACCACCGCTCCCCGGTGCTGGATAATGGACGATCGGATTGTTGAGGTCGGTCGGTCGGTCGGTCGCGTTTGGTTGCAGATCGTTGATTTCATTGCGAGCTTTGGCGGTGGTTTGAAGTGGCCGGATCTCATCCGTAGAATCTCATCCGGGAGCTGTTACATTCGTTGGGAAAAGATGCGTTACGGAAGATTAATAGGCCGTACGACTGTGGTGGCGATCATCTTGGTGGTGACGAGCGACG…
ASTF_00003652	XLOC_001886	4477	345	0.6153	-0.521999	0.000278448	2	0	0	GTTGCAGTTCGTTTTATCCCGTTTGTAGATCGTTGTTGTGTCGGACGTGATCGTGTAGAGTTTAGAGGAGTAGCTAAAGTCTAGACGATATTTTTTATACGATACGATCCCGCTTTCCCCTATTTGACGTTCGTCGGCGTGGATCGTTCAGCCATCAGTCCTTCCCTTTCCCAGTGCTAATCGGTGGCGAACAGCCGTGTCCATCCGGCGCGTCTCGTATTTATACACAGATTCTACCTAAGATTAATCTAGAGTAACAAATTGTCTAGCCAAAGGTGTAATGTCGATTGTTGTAGTAAGTGAGGAATCCAGTCGGTAAAGAGAGAGAGTGAGAGAGAAGGTAGAGATCCTCGTCATTTTAGAAGTAAACACCCACCCCCACCCCCCCCTTATTCGCAT…
ASTF_00003664	XLOC_001894	1293	474	0.4367	-0.111555	0.0903643	2	0	0	GAACAAGTTTCTCCGTTTCGCGCTGCAATTGGTTCGGTTCGCACGAAGAAAAACGCACGCGATATACGTGTGCGAGTGCGAGTACTAGAATTTCACGAATTCACGCCCTCTCTCGAGTTTAGTGCATAACTTCCCGGAGTGTGTACCTTTCCCGGTGAGGAAAAACCACCGTCCAATTGGATTGCTTCGCCCGAAAATAGTGGTCGCGGTAGAAGGAAAGGAGGCAGACAGCGGGAGGAGACAACAACAAAAAATCCCGTGACCGTGAACGGCCGTGATCCAATCGGATGGTTTTTGGTTGTCTCTAGAACGGGCTGCTTTATCACGGGAAATTCTCGTCATTCGGGCAGGAATCGACCACGGTCCTCTGGTGCATCTTCCGAAAGGTGAACGCGCTTG…
ASTF_00003678	XLOC_001900	1261	300	1.1452	-0.196423	0.131596	4	0	0	CTCTACATGGAATCCTACCGGTTCAACTCCTATCTGGAATACTACAAATCCACCCCTAAATTGGACAACTCCTGATGTGAATTCTACTTGGAATCCTACCGGTTCAACGCCTATTTGGAATACTACTGACCCACCGCTGAACTGGACGACTCCTGATGTGAATTCTACATGGAATCCTACCGGTTCAACTCCTGTTTGGAATACTACTGACCCACCGCTGAATTGGACGACTCCTGATGTGAATTCTACATGGAATCCAACTGGTTCAACGCCTATCTGGAATGCTACTGATCCGCCCTTGAACTGGACGACTCCTGACGTGAACTCTACATGGAATCCTACCGGTTCAACTCCTGTTTGGAATACTACTGATCCTTCGCTGAATTGGACGACTCCTGA…
ASTF_00003714	XLOC_001919	1528	36	0.7818	-0.59113	0.00135453	1	0	0	TCGACTACACTGAAAGCAGCGAGCTGTGAATAATCCCCGTCCTACACACACACACGCCTATAGGCATAGGCTACATTTGCAACAGTACACACGAACACACGTATAGACTGCAATCGCTAGCGCAGCAACTCACGGAGTCAGCTGTCAGCCAAAGCGCCGCGGCGTTGCATAATTGCAGCGCGATTTATTCGACGCGCAAAGAAATTAAACTCGTTGCGCGGAGAGCAGCAGCAGAACGACGCACCAGCGACGAGCGCAGCGCAAAGCAATGAACGACGCAGAATAGTCATACCTCTATAGCAACAGCCAGCCAGCCAGCAGTAGTAGTAGTGGCACCCACCACATCGAAGAAGGCGACGTTTCTCGATCGATCGACCGCGCATCCTCGTGGCTTCGTGT…
ASTF_00003715	XLOC_001920	917	174	1.1494	0.0320754	0.120982	1	0	0	TGTCGCTAGGCGACGAAATCCATCGGGTGTAGTTGCTTCTTTGGATGAGAAGCCAGCCTGCCAAGCAATAAGAGGATTAGCAGCAGCAGCAGCAGCAGCAGCACACCCAAAAAACTAACCGCCTTGCACCACCATACATGCTGGCACCGCACGGCGGCAAGAAGCGTTATAAAGTCAACCAAAAACTCCAATAGATTAACGATTCCTAGCAGTATTTGCCAAGTTTCTTGTCGGTTGTTTGTTGAAACACTCGCGGTGTGGTAGAGAGAAGAAAAAACAAAACAAAACAAAACGCTTAAGCAGGCTGTAGCGCACTGCAATTGATCTTATTACTAGTACCACACTACCGCAAGCTATATTACTATTATTACTTCTACTACCCCTCTACTACTACAACCA…
ASTF_00003718	XLOC_001923	910	171	0.6149	-0.265298	0.0133531	1	0	0	GCTTGAGGGATCGCAGGAGCGCGTTCGGATTGGTTTGAATCGATCTGTCGATCTTTCATTTTGCTTCAAATGCAGTCCGCTAATGGGAAGAAGGAGGCAGGATATTGGCCAAAAATGTGATAACAAAATTGAAACATTCGGTTGCAAACCAAACACACTCCGATAGCTTTCACCGGTTGAGGCGACAGGCGGGAGTCGTGGAAGAAAACAGGTATTTACTACAAGTACATATGGCAAATGGACAACTGTTTGCATTATTGTACGTGTCTTTCGCGTTTACCTCTTCGGTGAAACAGAGGTAGAAGTAGCGTAATAATTTGAGTTCCGCTGTCCGAATGTGTCCGTATTTAAGTTGCCTTTCCTTTTGACCTAAATCCCCGGACTCTGTCCGGCAAAGCA…
ASTF_00003719	XLOC_001924	479	99	1.0883	-0.19853	0.0582111	1	0	0	AGATGCAACACGTTTTAGTACCTGTCAGCGACGAAATGGGAGTGCACGGCGAAATGAAAAACGATCATACAAGCGTTCTTTTTGAAGGCGTTATATCCTGAGCACTTATCATGTTACTAAACATAGCTGAGCGATAAGCAGTGCTCCGAAAACGGTGATCGATGCTACTAACACAAGGTGCTAACACAGAAAACAAACGGACGCTACGAAACACTAAGCGCATGATGTCGCTGCAACAAGGAGAACGGAAGTGAGTAGTGTAAGATCAAAATTTGATAAACGAAAAAGCAAAAAAAAAACCCATAGTGTGTTTAGTGATTCGCTTTTAACTGTGAGTAAACCTAATTGGTTGGACGTGTCGTGTGAGTGTACGGTGAGATAGAATAAATCTCTTATTAA…
ASTF_00003720	XLOC_001925	7231	228	0.4191	-0.380574	1.86844e-06	1	0	0	TATGCGATACATTTGTGTAGTAGTTAAGTAAATGAATACGTACCAAAAAAAGAAGAAAACAAAATGCGAAGGAAGAAGACATGTGTGTAATGTGTAATGAGGCTATCAAACACACGAGTGGTAATTGAAACTAAATATAGTAAAAAGATAAATGATGATGCGTTTTGGGTGGGGCGAATCTTTGAGTGTAAAAGAAGAAAACAAAAAGAACAAAAAAAAAACGCCAAAACGCAAAACAACAGGGTTCAATAAGACAAGCAAAACAAAACTGCAATCTAACAGCGGATCAATTAATATATTGCAAATGAAACAAACCAACGGTACTGAAGAAAACAACACACATACAACTTATAAACTACGTTGACAAAAATCACACAAACCACTTAAAATGTTACGCAT…
ASTF_00003724	XLOC_001929	1334	321	0.8774	-0.224291	0.0649761	1	0	0	TCCTTAAAAATCTATCAACAATAAGTGTAAATCCATCACATTCGTACCGGTATGGCCAGTTTTCACAAAATAAGTTCCCTCTTTAAGGCCCTCATAGAACCTGTGCGAGTCATTATTTTCTATAAACGATGTTCCTTTGTGCGGTGAATTTTCTTCATACTCTCTTGCTACGAACGATCCTCCAATTGCTCCAGCCACATCCGTCGGACCATCGATTCCATCTGTTCCAGCGGACAGAAAACACACCGAATCGGACATCGGACTCAGTTTCCGAATGCCGTAGGAAAATCGAAGAGCGAGTTCCTGATTTCGACCTCCTTTTCCTCCGCCGGAAACGCATATGGTTGGCTCACCAGCTCCAACGATCAGCAGAGGTTCCATTTTCGAATCGATCACGTT…
ASTF_00003729	XLOC_001934	729	129	0.4457	-1.03506	0.00116027	1	0	0	ATTTCCGTTTCCGTTTCTGTTGATCTGCTTTGTTGCTTTGCTTTTGCGTTAAAGTTATGTTGTAAGTCAGCTCGCTTTTGTTTTGCATAAAGATCATGTTTGAAATCTCGCGCGCGTGTGTGTGTGTGTTTTTTTTCGTTTTTCTCTTTTCTTTTCTCGTTCTTCGTTCTTTAGGTCTAACTATTGGGATTCACTTTTCTTTTTCTTTTGGTTTTGTGTTTTAGATTTGTTTTACATTTTGCTTTAGTTCTTCAATCATGACTCCTGCCACGGTGCACAATAACTTGAGTTGAGTTTTTTGCTGTCTTTTTTTTCTTCTTCTTAACTCCCATTTTTGTTTTTCCCTTTTTTTATTTGTTCGACTAAATGATGCCCACGCTTGCCTTAAAAGCGAATCGA…
ASTF_00003730	XLOC_001935	1112	135	0.5347	-0.770458	0.00177998	1	0	0	AATATTCAAACCCAAATTATTTAACAGTTACACAGTTAGCTACAATTTTTTTTTGTCTTATAAACTCGAATTAAACTTAGTTCGACCGTGGGTGGGCAAAAAAAACAACCAAACAAACGCGATCTCTTCCTTTTGCGGAGGAGGGGAGGATGCTTTGGAAGAGTTGTCGGAAAACCCATAACCCTGGTAATAGTAGTAACATTCAACAGACTCGCTCCAAATAACCGTACGTCTGACTAATATCGGGCGTCAAAGTAGTAGTAGTAGTAGTAGTAGTAGTAGTAGTAGTAGTGGTAAGTCCCTTGGCAGTAGCTCAATGTAGGTAAAAACTTCCTTGTGTTCAAGAAGAAGAGTAGTAGATCGGCTCGATCGTCGTGTGCATTTGTCTGCCTGCTTCGC…
ASTF_00003731	XLOC_001936	365	57	0.7723	-1.17483	0.00191239	1	0	0	CTCTCCTCTCTCTCTCTCGTCTCCTCTTCCTCTTTTGTCCTTCTTTTTGTTCTGTTTTTGCATTAACGATTCAAGGGTTTTGCATCTGCATTCACTCCACTTACGCGATAAAGGTATAATATCCATTAGGGTTGGACTTTTTTCTCTTTTCTTTCCGTTTTCTTTTGCTTTGTATTTAGATTGGTTTAGCTTTTTACAAGTAGAGAGTTTTTGGGTTTTTTTCTTTCTTCTCTTTCCAGATTTCCTTTCGCTCTGAGTACCACACGTTGCCCTCTTCGCGAGAAAGAGATTGAGTGCTACAATGTTTTCTACGCTGCTTTTTTTTGTTTTGTTTTCTGTTTGCATTAAAGTACTCTGATAATAGT
ASTF_00003732	XLOC_001937	396	171	0.4861	-0.533588	0.00967041	1	0	0	GCCGCGAGGAAGTTCGTTCTGCGCGTCAGGGAAGAGTACTGCAAATGTTCCATTACAATTTTCTCACCTTTCTTTCCTACTTTCGTGCTCCTTGCTTCCTGTTCTTTTTGTTTAGTCACCCCCCCCCCCTCGCATTGCCTGTTCCATCGTGTGTTTCGGTGTGTTGTTGTTTGTTAGTGATTTTCACAACTCTAGTGTGCTTTGTAGGATGCTGAAGCTCCGTATTTCAACACAATTGGTCGCAACGCACGCCAGTGGTGCAACGGAAGAGTGGGAAGAGCAGAAAGTGACTCTTGGCTGGACTCACCTCAGCAAGAATGTTTCTTGTGGAAGAAGGTGTTAAGGGTTGATGTTCCTTTCTGTTTACTTTTCTGTACTTGTGTGTGGCGATGGTTG
ASTF_00003734	XLOC_001939	435	0	0	0	0.00168549	1	0	0	GCATTTGTGTTATCTGCTGAGTTAGAAGAACAAAAACATAAGGAAAGGAACTAACGAAACAACGGAACACCTCGCAAAGTTTTGTGGAAACGTTTAACGCATACGTAAACCGTTAAAGGGAAAGCCTCCTGGAAGCAATTTAATAGAGAGAGAGAGAGAGTTCAGAAACTAAAACAAAAACACACTGATAAGATTTGTTCCTCTATTTTGCCATTTTGATCAGCGTAGTATAATATATTTTAGGGTATCGCTTAGATAAGGCTTTGTTCGCTCTGAACCCCTGTCGCTTACGAGCGAGTGAGGGAAACACACTACAGACACTTTGTTAGGTTAGGATTTCTTTGTCGTTAAAAGCAGATTGAGTTCCACTGTGCGAAAAAATATCCCCCGATAGATAGA…
ASTF_00003736	XLOC_001941	730	198	0.8747	-0.520544	0.0253766	1	0	0	AAATGGATCGGAACATTTTATTTCAGATAAACGTTTGGCAAGCTATCATACTAGAGGCCAATATTTCACCCTGATTATTTTGGGTAAATCAGCAATTAAAACTTTTCTTAGCCTTACGATCGCGATCGCGAAAAGTCCTGTCGAGAAATCCGCAAAACAAAAAAATCAAAACCGGTGCTCCACTGTGGACAAACACGAAGCACACGAATTTTTCGACACTCTCGGCAGTCGCTCCAAGGCTCCAGCGGTTCACTGGAAGAAATCACCTTCTCCATCAATTCAGCCAGCTTGAAAGATGCGCTTTCCCCTATCGTGCCATGGATGGGTGGGTGGATACCTCTTTATGTGTGTGTGTGTGGGTATGAAGTAGAAAAAAAATGCGGAACGGGATTCTGAATC…
ASTF_00003737	XLOC_001942	582	123	0.6448	-0.26933	0.0147111	1	0	0	CGATACTGCGCCACCCGCCGATTCCCGGGTCGGACGGTAACCGTGTGTCGTACTTATCGTTGAAGCTAGCTCGTTCTTGGCTTCCCTCTTCCTTTACTGTGTGGGGGAAAACTCGGAAGGGACACATCCGAGGGTGGCGCACATCAGGATCGTTTCAGGAACAGCAACAAATCTTCGGGAGGATTATGTTTAGGGAGATAGCGAGCAACCGGGGGAAAGCACAATTGTATCATAGAAAGAAAGGCTTCGAAAGGAAGAATGTCTGCCAGTTGCGCAAATTTGGGACTGAGAAAGCTTCGTGCGTGTAAATAGTTAGTCAGTAAACCAGGTGCCAGGAAGTAAGTCAGAACGAAGGTGGGCTCCGTGTTTTGTGTAAAGTAAGCCAGATGAGAAAATCGA…
ASTF_00003738	XLOC_001943	401	105	0.8388	0.141835	0.0713846	1	0	0	AGTGCAGCGCCAACCATGGATCGATCAGCTGCAAAGACCCGCGACTCTCTGGCTGGAAGTTTCTTGGACGAGGTTTCGCTGACTCCAACAAATACTGTGAGAAGGCGCGTCACTCATTGAGCAAATTCTTCGCATAGTCGTCAGCCGTACCCCGTTACAGGAAAGCACACCCAGTGTCAGCTGATTTCCACCGTACCTGAGAGCGATTCCAGCAACTCACTTTATGCAATTCAGCGCCAAGAACAGTACTCGAGTAACAGTACGTTACAGTATGGAAATATAAAGTGATAAACTGAGCATTAAATTTAAGTTCCTATGTATCCCGATAATACAAATACACACTTTAAAGCTAAAGTAACTCCCTTGGAATTAACAAAGTGCCCTCCGCTCTGCCCAATC…
ASTF_00003739	XLOC_001944	377	75	1.0368	-0.34471	0.0336243	1	0	0	TTTCCAGTCCGTTGAGCAAAAAATCGCCTTTTCCATCGCAAGCGCACCGGCGAAGGCGTGTGTGTACTCGCGTAAAGTTCGATTAGAACGTCGTTGACAACACATTTTCCACAACGATAAACCTGCAGTGCCGCGGGGGTGATTTGTGTGTTGAAATCCAGGTGGATGTGAAAACGTGAAAACATATGTGAGCGGAGTGTGAATTTGGATTAGAAATATGAATGATCGTGAAATTGGTGTTCGTTCACGAAAGTGTTAACAAGTGTGCTTTAATAATTGAGATAGCAGCAGCATAATTGATTCGATTATTACTACGCACAGCAAAGCGGAGGAAAGAAAAGAAAAACCTATTGCGTATTTCGTTTGTGCGTTGTGAT
ASTF_00003741	XLOC_001946	2154	252	0.6561	-0.643406	0.00238137	1	0	0	CGAGTCAAAGTCTAGTCTGCTTCAAAGCGTTTAGGGAATCAGTTGCTGCTAAACCTTCAGTGGAGCAAAAACCCTTCTTGGACGCAATCTTGGCCAAAAGGAAAGAAGGAACGATCTTTTAGTACGGCCTTCTCCGGAAGATAAAACTTATATCGACGCTGTGCTAAGATGTGCCAACTGAATGCACTTAATTGCATCTCGCACGGAACGATAATTACGCCCATCCGCCTGCTCGAGACACAAAACGGGACATTTTACGGGGCTGCCGGTGCCTGGTCGAAGTACCGGCGATCGGGTTTGTCACTGGCTTTTATTTTTCCCTTAATATGGTGACCATAGCAAGAGAGAGAGAGTGAGAGAGAGTGAGATAAGAAATTGTCTGCACCCCATTAATTAGCA…
ASTF_00003756	XLOC_001956	326	204	0.7088	0.053126	0.100861	2	0	0	TCGTGTCGGTTAAGCTACTCAACAGCCCCCTTAACAGTTGAAGTCGCGATGAAGTGCGTGTGGCTTGTTTTGCTCAGTTTATTAGCAATTTTTACGGTACATGAGTGCCTCACAGTGTTGCTGCCGCCTCCAAACTTTTGCCCACAAGGACAGCGCCGGGACCATCGGGGCGTGTGCCGCCAAATCTTTGATTGGCACGACTTTGATGCAATCAGTGCGTAACAACGCAGCAAAACACATCACTCAAGCCGTGAGCTGCTTGGCGGTGAAGTGTTCGAATGACCCTGTGTTCCATCGTGTGTGAGACTCAGTGAGAGGAGTTTAAA
ASTF_00003778	XLOC_001965	480	27	0.7869	-0.263761	0.011235	1	0	0	ACAACGCACAACGGGTCAGATAGCTAGCGTCTCGCGCGACAACCCGACGACCTAATTCAATCGTACGTACGGAAGATACGTTGAGGTGAAAGGTGAAGACCTCCGTACATCTTATCGAACAAAAGAAAGCAAAACGATTCGGCAGATTCGAGTTGAAATAATCCGTATCGGTAAGAAAATGTTTGGATACTAACATTTAGTGCGTGACTCTGGAGTGTGTGTGACAGTGTGTGGTACATTTACATCACCAAGTACGAGCGGTATTAGCATAATCTTCAATAAACGGATCTCCGTGAGCGGAAGGAGCAACACTTACATAAGGTTGTTGTGCTGTGTGGATAAACCGTTCGCACACACGCTCAAACGAAGTTCACCAGTGATGTTGAAGTAACAGAATCA…
ASTF_00003788	XLOC_001971	506	117	1.1235	-0.617943	0.0279584	1	0	0	TTTGCTTTCTGTTAACGCTAGTACGGATATACTGATGGACGCACTTCGGGACAGGGCAGGACTTCTTGAAGTTCGCCAAAAGGTGTGTGTCACAGCAAGGTGCAAAACTTTTAGGCAATTAAGACAAAATTCTGCAGTACTACATGTTTGAACGAAAAAAATAACGTGTAAAGTGTGCGTGTGTGTTTAAAAGTGAGTGTGCGTTTGTTGGTTTGTTTTTTCCTTTCCAAACGAAAAACCGATATGATGCTTATCGTATTTAAAAAAGAAAAAGAAAACGGTCACCTTTTCCAAAAACTGTCATGCGCAAAGAGGCCATTTTAGTAAGCACTGGTTCGTAATCTGCAATTTGTTTCGGCTTATAAAACGGTTTAGATCACAGACACACATATTTGGCAA…
ASTF_00003789	XLOC_001972	809	246	0.6852	-0.138641	0.0477458	1	0	0	CGTGTAAGGTGGAAAAGAGCCTGTAAAAGAGATACGTAAAGTTATGTTTTTTGTTTCGATTTTTCGTCCTTGTTTGTGTTGCAAACATTTTCTTGCAAACAAAAAAAAATAAAACCGTTGATCTTACAGATCAAACGACCGAGATACGAGATACAAAATGAAACAAAGTAAACAAAAAACAAACAAACAAAAGCTGCAAGTGCTGTAACGCAGTGAGCAAAATACGACACAAGAGATACGGATGTTTTAAAAATTCAAAATTCTTCAAAAACTAAATCAAACAAACATACAAAAAAATGAAGCGTACACATTTAAACTCTTCAATCTGCTTTATTGGAAGCCACCAGATTCTCGATTAGATTTGTGCAAGAATCGCTTGAAACACTTGCCACAGCAACA…
ASTF_00003790	XLOC_001973	545	96	1.2142	-0.483181	0.0392877	1	0	0	TCTGCCGAAACAGGGGGGCAATACTGCACCGGAGAAGAGGGTGCACCACTTTGCAATAAGCTAGTCTAATATATTTTCTTTTTCAAACGCTGTATTACACGATGCACACGCGTTTGTGTGGCGCACACCCTGCACAGACTGGGTGGGCCTATTTTCAAACCGTTGCTCGTCAGCAAACTGTGTAAACTGAAGGTGAACGGCACGGTAGCTTGAAGAAGGAACACCAAGTGCTCGATTGCGTGTGTAAACGGGAGTGCGTCGCGATGCCACGCTGTCCGTCGGGGCGCCCACAAAGCAAGTGCCGTGGATTTTCATGGGAGCCGAACCGAAGAGACTGTTATTTATTGTTACCTCAGTAGATGTTAATACGCGTGTGTGTGTGTGTGTGTAATGGCGCGC…
ASTF_00003829	XLOC_001996	1793	138	0.391	-0.44303	0.00103045	1	0	0	CGAGAGTCATAAAAACAAGTCAATGGCTCCATCCTAACAATAACATTAACAAACACTAATTGCATTAAACACACACGCATCCATGCGCATCCCGGTTGGGATGGATTTTTGATCGTAAAATCAATAGATGGAACCTCAAAACTTACCACCACTTTCCCGTACGGTTATGCTACTTGTGTTTTCTGTTCCAACTTTTACAATAGAAAATAAAAACTGTTGGTTGTTTTGTTTCTGATAAACAAGCACTGCGCTCTCTCACTCTTTGTCCAGTGTTGATTTAACCGTGCGACCAATTCTCGGCTGTTTATCTTCACGCCTTAGCGGCGCAGCTTCCCTATTTTGGTCGAACGCGAACCACATGTGCTTGTAGTTGTTTTATTGCCTTTGGGCGCTGTCAAT…
ASTF_00003830	XLOC_001997	3519	273	0.6148	-0.338705	0.00082698	1	0	0	TTAATGGCGATAATATGTATTTTAAGCTGGTGAGCATCGTTCAGCAGGTATCTGTATTGTAATATCTGGAAGCGATCAACCACAGCAACACTAGTTTATTCCCTCGAAACTTTTATTGAGTTTTCTACGTCAGAACAGCAAAAAAAACCTCAGCAAATCACTCTCCATCGCGTGAGCGTGTGGGAAAAGCTGATCATTTTTAAACAGTGACATGATGTTTGTGCTCCTTGTTTTGTAAGACAACCGCAGAACGAAACATGGAAGCGCTCGAACACACACACACGTACATTTGAAAAACGAATTTGTGCGTCCATGCGTACAGTTTCGGGCGGTAGAATTTTTAAAAACCCACTACAACAAAAAGTATTCATTACGCCACACGTATATTATACACACACA…
ASTF_00003831	XLOC_001998	1745	231	0.8794	-0.956992	0.00318563	1	0	0	AATAATGGTTATCCCTTGCCGTTTGCTAATTGATAACAAGTAAGCATACAATTGTACACCCCGACCGGGCATAACTAACCGCCCGTGCGGTCACATGATTTAAACACCGCAACAATTTTTACAGCAAAAATTAATCCAATATACTGGCTGGCCCGCTTTCTGCCCATTCCCAACCTGTCTTTTCTATTCCTTATCAATTAGTGAGCGATTGTGGTTTCCTGTTTCTGTCTGCCCATTTTATTTCCCCCATTATTTTCCATCCCCATGGTTACACACAGTAGAAGAAGGAGGGGGAAAAAACACGATTTACGATAATAATTATCACTGTAATAAAAATCAACATTTCACTGCCGGCTTTATTTTCAATAATTAATCATTTGTTACATCTGTGATGGCGCG…
ASTF_00003847	XLOC_002004	775	150	0.7102	-0.405332	0.0127102	1	0	0	GTGAGATATTGGTATTCATTTAGTACAGACAAACAGAGAGCGGTTGGCTAACAGCTGTGTGGTTCTGTTAGATGAGTTGTACGCGGCTCTTACAATCGTGCTCGATAATGATAACGATAAGAGGGAGGTAAGGATAATCAACACAAATCATAAAGCAACTCACAAAATGTGTTAGCATACACGAGTAAACGAGTAGAGTTTATCGTTGCTAGAACGGAAACGAAAACGTAAAATAAAAGAAAAGAATAACAACGGAACAAAAGAAAACCGAGAGTGTCTAATTAGTGGAAAACATAAAGCGAAGGAAAGGAAATCTTCCCGCAATCGCAAAAGTCATTACAGCACATACATAGCGCATTTCGGTCAGAACCCGCATGCTACCGCAAACCATTGTGTGGT…
ASTF_00003884	XLOC_002030	1024	405	0.7673	-0.260219	0.127911	2	0	0	ACGCTCAAGTAATCACGGCACTTGTTTGCTGGTGGTCAATATTTGCCCATGAGCGTGATGCTTGGCGACCGTCGGCGAAACCATCATCGGTGGAACCCCACCACCGTCACCATCGACATAGGTGGTTTGATATGAGCAACACCCATTGATAAATTTACATCGCGTCACTGGTCTTACCGGCTGCCTGGGGAGAACAACTTTTTGCAACTCGTTTGCTCCGTTTACGGTTCGAGAGTGTTTTCCCGCCAGCGACACCGCGGTTTGCCATGAGAAACATGATATCGATTTTATCCACCCTCAATAGGGGTACAACAGCAGGTTCGACTACAATAGACACAACACAACAAGCGATCAAGTGGCAGACTAAAAACGGTATGTCCAGTAAATGGCGCTTGATGG…
ASTF_00003908	XLOC_002049	2326	168	0.6177	-0.574734	0.000943543	1	0	0	TTTTTCTTCTTTCTTGGCACTATAACCTCTAAAGGACTTGATGTTACCCGTACGTAGCTGGATAGTTAGTCCTGCGTAGGGGGAGGCAGCCTGGATGGGATTTCCCAGGACTTAACTGACTTGACCAATAGATTTTTAACTTCAAGCGCTGGATGAGCCAATCATTAAAACCCAGAAAAAGCTGTGTTTTCAGTGTCAATGTGTTTTCAGGGTCAATGTTGGGTTAAGGTCCAAGCTAACTGCTAAGTAACCTCTAAGGACCCTAGAAGAGGTGTTAATTTTTTTTTCTAGAATGCTTCCTGAACGTGGCATTTGAGTAAAATCCATCGAAAGTATCTGTTGTACTTTGTTTTTTTTTTTCATCGCCCAAAGTTCCAAAGTCTATCCTTTTTTTAATGC…
ASTF_00003912	XLOC_002051	528	39	0.4391	0.00823464	0.00790611	2	0	0	CCAGTACCGTGTTAATGTGGCCGTGAGAAAATTGCCGTTTCGCAGACAATTGGATACAGTTTAAAATTACACCTTCACCGTGCCGGATAAGAAAAGGTGAGAAGGGTGTCCATAATATGTGAATCAAAACCTCCCCTCCCGGGCCGAACGGTTTTTCTTTCGATGCCGGTTGTGTTCCTCCGCCAAGACCTTGAAACACCGCCCGGGTGCGTAATCGTCTGGTCTATAATGTGCGTGCGTGTGTGTGTGTGTCAGTGTGTTGAAAAGGTTTTGCTACGAAAGGGAAAGGCAATGGCAGGCTGAAGAAATACGCCGAGAGGACGACTTCCGTTTCAACAACACCACTGGACGGGGCTGGCAGTCGGATGACGAATTGAGAAAAAAACAATTTCGCCCTGC…
ASTF_00003925	XLOC_002058	442	219	0.6767	0.0971513	0.0994439	2	0	0	GCCACTGATGTTTATATTTCTTTGCTGGTCAAGAAGTGCGATCAAATTACAATTTCTAGCCAAATTTTCATGCTAGCGGTTGGTTATTAGTTTGTTTGCGTGTGTAAAGTGATCCGATCGGGTGCCGAAAAGTTGGCCAATTCCTTTCGAGTGAACAGAAAATCGCGCGCCCGTATTGTATTGCCACTCCCGCCGTCGCCGCCGTCACCGTCGTCCGTGTGTAGCGGCGGGCGTACGTGATTTTTGTTGTGTTCCGGAAAGTTTGTCAATTGGAGATTACCGTGGCAGGAGTTCCACGGTACCATCCGGTCGATTAATTGTGCTCGAAAAAGGTTCAGTGCTAAAGGAAGATTTCTGTTTTGACCCGCCTCCGCCGGTGAGGAATTCGTGGTAAGTGTC…
ASTF_00003956	XLOC_002076	426	162	1.0828	-0.198618	0.102319	1	0	0	TGAGCGTAATAAACCGCAAACAAAACACACAGGAAGGGCTTTAGACGGGTGAACAACAGTTCCGTCGTTGCCAGCGGTGCGTTTTTCGATTGCATCGTAGTAGGAGGCTCCCGGGTGTTTGGCACTCACATCATTATGCTTTTAAGTGGGTTGCTGTTTTTTTTTTTCGTCATGGCTATTAAACGTGCGTGGTGACGTGTGATCGGACTATGATGATTATGATGTGAATTGCACAAACCTGCGGGGTTGGGGAAGATACGCAACATGTTGCCCCTGCTCCAGTCCATATGTTCCTGCAGCAGCAACAGTCTATTCGGCGGCAGTACTTTTCGGTGAATTACCTGTGACAGTGAGTAGCAAGCGAGTAAAAAACACAATGCATCAACAGTGTGTCAATGT…
ASTF_00003957	XLOC_002077	1352	138	0.8482	-0.127632	0.0152543	1	0	0	ACCTCCTTGCCGAAGCGATCTATCAAGAGTTGTTGTAATCGAAGGGTATCCAATAGAATAAAAAGTCCAGTAGTGGATCTCTTCTAACCAAGAGACGTTGTTATCTAAAGAGCCTTCTAATTAGTCGGTGAGACCTCGAACTCAAGCGATATTTACTAAAAAAGTTTCCTCGTGGTTTAAGCTTCCTATATCAAGAGATCTCCTTGGAGAGCTTCACATCAGCGCATTAGCTACTCTTCCTTATCAATTTCAATATTATAAAATTTAAATAGCTCTGGTCATCACAGGCAGTCTCAGCAGTGACCCGAACATTAGCCACTGTATGTATGAAATTGAAAGATTTTTGGACGAGTCCCGTATCAAGTAATCGTCTTCGAACGTTAATTCAACAGGCTGAGC…
ASTF_00003977	XLOC_002088	249	210	0.6212	-0.110992	0.0640929	2	0	0	GACGTGTGTGGAGAGAACGCCGCGTGCGTACGGGTTTTTCCTTTCCATTCTCGGTTTGTGTGCGGCTGTGTACGTGTTTCTCGTGTGTCGCTCGGGAGTGCAGCAACTGTGGAAGCCTACTTTTTCCTGTGCGACTCCTCCTTGCTGGCCGGATATTAATCGCGAACCAACACGACGCACACAGGTCCGTTCAATAGTATAAAATATCATCAGGCAACCCGACGCGTTCCGACGGAAGTTTTGCGGTGC
ASTF_00003978	XLOC_002089	1167	417	0.5151	-0.0278049	0.0988198	2	0	0	CCATTTCATTACGCTCGTAGTGAATGGAACTAGAAGTCCTGCGCCACTTAAAACTTCCCACCAAAACCATCAATCCATTCAGGCACGAGTAAAGGTTGGCATGCACTTTCGCTTTCATTATTGCAACACGTCCCCGATCGCCGAGTCCCGTGCAGGAGGAAGTCACCAATCCACCAAACGTTGACCCATTCTGCCTTTGACAGCAGAGGCGTGTGCATGAGCTGAAAAATCTCACCCGGAAGAAAAGCACCGCAACGTGTCCAATGACACACGATGGGGACCCACTTGCAGCTACCGCTCCCCGCGCAACCGCTTACCGCGGCTAATGACGAAAGGCGGTGTGACACGAATGTCACACTGTCTCGGATGTATTCTGTCGACCTTTCGTGGTTCGTGTCC…
ASTF_00003986	XLOC_002095	2293	456	0.8428	-0.184599	0.0585818	6	0	0	CGTAGTGCGAGTGAAGTGGACCGATATGGAGACGCTATCGAAAATAATAGTAACAAAATACTTTCCAGGGATTGAATGCATCAAGCCAAGCGATCGTCTGACGGACGACGAATATCAGATCGTGAAGAGATGTACGCTGGACGATTTACTCGGGACCGAATCGAATCCGGCGGGACTGGAACAGATTTGTGAAGGAGAAAAGGTGCAGACAGCAGAATATTACAAACAGAAAGAAAAAAAATTTCAACGAAATCTAGTGAAACTCCATCGCAAGCCACCGAAGAGTCCCCGAGAGCGTCGCGTCCTTCCGCCAGTGGTGCCTTCAATGCGCGATAATCGTACGGTTGCTAATGATGATCAATCTGCAGCTCGCGATCAGCAGCTTGCCCTTCATGATGG…
ASTF_00003993	XLOC_002099	1828	396	0.7211	-0.0530516	0.0610975	1	0	0	AGATTAGCACAACGACTTCATGAATTGATGATTGAAAGCAAGAGTTTGCTCTATTTGCATTCCATCTCGTCGATCGCAGCGCGATAGTGCTCCTCCAAGTACAAGTCCGTGTACTCTAGCGTTTGAATAATTCAAGATCGCTTCTGGAAGCAGGTAGGACAGCTTCATTCAGTACAACGCGTAAAAGGGGTGGATGAAATGAATTGGCAGGGGGATGCATTATTTAACTCGACAATGTTTCGAGTAGTTTTATGGTCTAACGATAAGTCAAATTACTAGCTCCCCATGCACCCTCCTCATAATCTGCCTATTGTCAGCCCTGATGAACATTAAGTCATACGCTATCATAACCATCAATTAGTTGTGTTGTACCTCATGGTCTCCCATTCTTTATCTGCA…
ASTF_00003994	XLOC_002100	217	81	0.9439	-0.0634837	0.0629001	1	0	0	GCTTTCTGTTTCTGTGACTTAATTTTAACCCGTAGCAAAGTAGTCAGCCCTGGCCGTAAGGAGAGAGAGAGGCGACGGTCTTGAATGAGAATTGATCTCCGGTCCTGCCTTGTGAGAAGATCGGCGCCGCTATCGCTTCGGCTACCGGACCACCCCAAGGCCTGATGTTCTAGTTAAGGATAAAATTCGGTTAAAGTCTGAATAGATGCCCCCCCAT
ASTF_00003995	XLOC_002101	240	54	0.6111	-0.661092	0.00458201	1	0	0	AATCTGTAAGTATATTTAGAGTTTTCAATTATATTACATTTTCTTTTTGTTCTGTTGTCGTGTTTTCTTTTTTCTTCCATTTCTTTCTCTCCTTTCCATTCTACACCCTCTTTCGGCCGAGAAATATATGCTAGCATTCGCTCGGGGTTGTCTATAGCTTCGTATAAAATATATACTATATAATATATGCGCTCTGTTTTATATATATATACTTTACGTCGGCGCAAGCTGTATGATTCT
ASTF_00003996	XLOC_002102	1291	195	0.6403	-0.345003	0.00885883	1	0	0	CCCCCCTCTTTTCGCGCAGTAATTACACTTTGGGAAAGTTGCTCTCCCCCTCCCCAGGACGGGACCCCTTTGGGTTTTATTTGCCGTCACACTAATGGTCTGCCACCTTTCCTTCCGAAAAACTCAACCCACCCAACCCAGCTTGATTGACTTACGAGCGGCGGGGGTCTAAGTTACGACCGAACTTAACGGCTTCCCAACCTTACTTACGGGTGTGCGAAAAGTTTTCCTCCGCACCCCACCCCCCCTTTAGTAGCAGTACAAAGGGGGTGGTTACCCCCGATTTGCAGTGCGTTGGCGTACGAAAGGAAACCGGTTACTTGCTCTTCGGTCGGATTGGGTGAAGCTGGGGAACAGGCGCGTTCGGTCGACATGAAAAATTACTTACATCAACTTGGG…
ASTF_00003997	XLOC_002103	724	99	0.938	-0.681245	0.00895353	1	0	0	ATTGAAACGGGTGAAAATACTACCATTATTGGTGCTTCCTTACATCACGATGGCTAGTGGGCTCCAAAACGGCTCCTGCTCTACGGTTCGTTTTGTGAGGATGTGGAACTGGTTGGTGGAGAAGGGCCGCAGAAGGGTTTAAAGGGCGGCGGCAGGCTTTGGTAAGCTCTGCCGTAACTCTGAATTTAACGCTCTACATCAGTCACTACAGCTCGCATGTGTTGCCCCTATCACTCTCTATGGCTGCTCACTAAGATTCACCTTCTTTTTTTCATGTTCATTTGCTTTTGTATTGAATTGTTTTTCTTGTGTTAATTTTGGTTTTGTTTCTTGATTATAATTTATTGAGATCTAGTAGTTTGCTTTAGATTCTTGTTTTAAATAGTTTGTGATTTGTTG…
ASTF_00003998	XLOC_002104	863	147	0.5898	-0.507758	0.00605735	1	0	0	AGTTATAGTCGAACACCACACACACACACAAAAGGGCACACGCGAGTAAGGTGGGCGCTAACGAGGAGACAGCGGCATTAGAGAGACATAAGCATCGAGCGCATAGTGTTCCTTCTTGAGGAGACTGGGACCAGCACCCTCAGAAAGGCCTTATTGAAACGAAGAGAAACCAGAACAGTAGTAGCAGATAAGTACAGTATTCCGAATGTTACATATTACGTTTATTAATTGTGTCGTCCGTTTTTTTTTATCCCCCCGACGTCTGTGATCCTGTGTCCCCATGTTTTGAGCTGCTCGCTTTCGGTAACGAGCGCGAAGAAGCGATAATAAGGGATGACATTTCGCGACATTCGGAAGTGGACATCAGAACGGATCAGTTTCAAAGTACACAGAGTTGAC…
ASTF_00003999	XLOC_002105	915	144	0.7752	-0.578881	0.00807302	1	0	0	TCGCACTAGCATTCTTTGCCGAGTTGTGTTATATTTGCCTCACTAGTAAGTCCATTAGTTGAATTTTTTAACACTCAGCACTAGCATTGTTCATCGATGAAGAGGAGAAGGCAGAAGTGGGGAGAATGTTAAACAGAGGACGAGCAGCGATACTCTATCGGATTCTTGCATCGGCTCACCAATTTCACGTTCAAAGCAACAATCAAGAAACAAAACTAGCGTATCATTTTGCGGAAAACACACGAAAAAGATCTGAATCACCGGCTTGAAAGTCCACAAGAGACGCAAATCGCTTAGAACAAGAGATTCATGCTTTTCTTTAAGTCCAAATCAACACACACACAGACACAGAAACAAAAAAGGGCAGACAGTTTCATGCACCAACTGGACTATTTTTTT…
ASTF_00004000	XLOC_002106	802	177	0.6302	-0.510343	0.00958343	1	0	0	AAAAGGGGTGCGAAAGTGAAGGTGAGAGAGAGAGAGCAACAAACGTATCAGCCTCGATGTCAAACATCGTCAGAAGGTGAAACAAGAATGGTTTAATCGTATAACACTCACATAGTTACCAGCTTATAAGTTTCCCTGCGATTAGGATCACATCCGGTTCACAGAAGGTGGAGGGGTGGAAAACCCCCCTAGATGTTAACGTTTTAATTTAAGCTGTCCGCTTACCAAGCCGTGAGCCACACACGACTTGTGCCCTTCATACACACCGGTGATCGCATTTGGTCTCCGATTGGGTCTCGAGGGTCAAAGGCAAGGCAAAACGTCGCATAAGAGCATGGGAGCGGACATACACCACACTACCTTGGTTATTATTATTACTATCAGGTTCGTTTTGTTTTT…
ASTF_00004001	XLOC_002107	5329	396	0.5957	-0.59453	0.000109928	1	0	0	TGAGCAAACTGTATATTATATTATTCCAGAGAGACAGAGAGAGAGATGAGAGTGTGTGAGAGAGTGAAAGACAGAAACAAAACAGATAAGATTATTAATTAATAATTATTAATATTATTTTTTTTCTTCTTTAGCGCTGGTTTTAGGTGGTTTTGTTGGTGGTTGGTGATGGTTTTGTTTTTGTTTTCATCGTCTCAGTTTCATTCCTGTAGCTATTAAAATATTAATTCTTATTAATTGTATGATTATATTAACATTACTCATTTCCCTCTCTCTTTGCTGCCACACGCACACACATTCCCCTCTATAGCACGTGCGTTGTGATAATTTTTTTTAAAATCATATTTCCTTCTTTTTGTCCCTCAAAAATGCGCTCCATCATCTCTGGATCATCGTTCT…
ASTF_00004002	XLOC_002108	1700	273	0.6039	-0.136776	0.014836	1	0	0	TTTCCTGTTTCTCCACCTTAAGCTGATGACGTACGCACCGAATCCGCCACAGTAAGGGAATGCTGATATGCGTCTGCTGGTGTGGGGATTCGGTTCCTGAATGTTTGGAACCCGAAAAAAAAACCGGATGCCACCACCAACACTTCAGCAGCAACCCACTCGGGAGATTTAAGCCGGGGGGCGCGCAGAAAATCCGCGTTTGGGTCGCGCGGCAACAATGCATGTGGCGAGACACGCCAGAGACAAACGATATGTCCAATGACCTTTTTTAATACTTGTGTGCCCCCCTTACCCCCGTTCCCCCCTGTCCAAAGTACCGTACAAACACATACACACTCACACACACGAGCGCAAGTTGTAGGGCATTGCTAAGGGAAGCTGCTTCAGCCCGATTCGCCG…
ASTF_00004003	XLOC_002109	1925	216	0.872	-0.589166	0.00510273	1	0	0	TCAGTGTTTTGAAGAAGGATTAAGAAGGTTAGGAGTACACATATGGCACAAAGGGCAGTCGTGAGAGCGCGATCGGATTACATTATGATTAGGGGTTGAGCAGTGGGTGAGCAGATGATGAGAAAAAGGATACACATGTACAGCTAATAAAAACTAGTCCGGTTAAAGTTTTGCCAGCCAGGTTATGCTTTATTAATATTGTTTTGTTGGTCAGTAGTAGTAGGTGGATAGTAGAGTTGCTTGCTTTGCTAGTAGAAGAAGTGGCGCCGAAGTAGTATGATTAAAAGTAGAAGTAGATGATTAATGATAGTAGTGCAATATTAAGCTTTATTAAATCAGAGTTTTATTATTTCTGCTGCTTGTATTGTTGTTTACCTCATCCATTTTGCTTTTGTAACC…
ASTF_00004005	XLOC_002111	417	39	0.8508	-0.720948	0.00561011	1	0	0	TGTGCACTCTTCGTTCGCTCTTGCTTGCGGTTTATTTAGTAGCGTCAGGCCGATTGCAGGCCCCGTCGATTAGTTTTGCGCGATCGCTACAAAAAAGCGGATATCTCGGTGGACTCCGAAAGATATCCATTAAAAACGGGCCGGCGATTATTAGAACACGACGGTGGCGGATGGGGTGTGGGTAGGGGTGAATCAATTTCATCGCACGATCGGCCGGACATCTTCGCTTATCTGCCGCACGTCGAACGGATCCGTTCGCCCCGTTTTCTGCACCGATCGATTCTATATGGCTCAATTTTGAGCCACCCTCCCGTGGGTTCCGATTAAAAAGAAAGAGTGGAGACTGGTGGATGTGTAGGACCCTTTTTTCTGTGTGCACCGAGATTTAGTTTTGATGTA…
ASTF_00004007	XLOC_002113	497	120	0.8042	0.15001	0.0661937	1	0	0	GCCTGGATTACACTCAGAAACTCTTCTAACACGCGCTCCAGCGTGCGGGTCTTCTACACCAGCGACGAGCAGGAACTACTAGACGCGTTTCCGGCGTCCAATGTCCGGGGCACCGGGGTGGTAGGTATGCAAATGCACAATAATCTCTCGCCCTCAATCGTCCCGTGGGGAGGCCCGTCCCAGCAGCAGCTACTACTGCCTCCTACTCCAGCAACTCCACAATCCGATACATCCGCCGATAATTGATCTGCTTAACTCCTATATCCACACACACACGCAACACACACACACACGCCCTCTCGTTAGTGAGTGTGCTCGTACTATTTTTTTGCATTAATCTTTCATCTCTCCATCCACATGTTGCGCTATTCCGGCCGAACACAAAGCAAAAAAAGGGCT…
ASTF_00004020	XLOC_002124	712	159	0.6603	-0.875536	0.0042765	2	0	0	TTTTTATTAATTACTCAATAATAATAATAATAATCATAATCATAATAATCCATTACTTATTAAAAAGTGTTATATCAATAATTTTCTTGTTTTGTTTCCTCTTCTGCTCAGCTCCACCGGGATGGGCGGGATGGGGGGACCTTTTGCTTCTTCCCTTTCTTCCTATTTTTCGGTAATCCGGTGTTTTGTTTTTTGTTTTCTTTTCTTATCTTCTTTTTTTACCTTTTTTCTGTTTTTTGCTCTCTTTCTCTCTCTGATTGCAACAATGTTTAGCTGTTAGGTTTGTCGATGTCGTTTGTTTTGTGTGTTAAGTCTGTGTTTGTGTTTTTGCACTCTTCTTTTAATCTCTGATTTTTTCGCCATTATCATCTAAAGAACAATCATCACACACACACACGC…
ASTF_00004065	XLOC_002139	3520	228	0.7438	-0.29892	0.000896394	3	0	0	GATCGGTTTGATGAGGGGTTTTATTCAACACGTTGAGAAAAGCTCATCGAATTTTATCTGAAACAAGTGTAAAATCACGTTTAATGTTAACTTTAACACCCGTGTACCTATCAGCATAGTACGGATACTTTCATCAATACGGTTCGAAGAGGAGGAATGCAAGCGGCGGATTGATCTGTAGTAGCTATTTTAATTGTTTGCTGACACTTCCGCCAAAAAGACTCCCAATTCCGTCCAAGCGTCCTGAGGGAAAGACGCAAAGATGAAGCGAAGGGAAGGACCAAATACGGATTCCGGTTCGTACAATCCAACGGGCATAAACATGGCATAAGTGCAACAGCAACTGCGAAACCCCCCCAGACCTGAGTGTGTACACAGTAGTGCGTAGTCAATTGTCTG…
ASTF_00004071	XLOC_002140	458	195	0.5347	-0.0695243	0.0370955	2	0	0	TGTTTCACCCGGACCAGCGCTCCCGCTGCCTAGCTTCGCTCTCACCGTGTGCACTTTGACAGTTCGCAAGACAGTTTGCAAGCGGCAGCAGCAGCTCCTGCGATGCTGAAGTGTTGCGTGTGAAAAGTGAAGTTTCTCGATTCTCGGTCGGTCCTGCGCAGTACGTACGCGGCGAGCTTTTCCCGAAATGGGGCTCCACTCGGTAGTTCGCGTGTGTGTGTGTGTGAAGAAAAGTGCGGGACACGCGTACCTACGGTGTACGCATGCCGTACGGGTACGGACGTAAACAATCAACATGTGTGACAGCTGCGAGAAAAAGGCGCGCACGGGACATAAACACGATCGCAGGACACGTGCTCGGCGTCGCGAATCAACAACAACGTGCCGTTTCGATTCTGC…
ASTF_00004143	XLOC_002175	906	159	0.8325	-0.60998	0.0102658	1	0	0	AATCGTGCAACAAACTAATAGTAAAACAACGTTTAATTAACAGAACAAGTAACAAACTACAGCAAATGCGCTACTAAATTCAAAGTTTAAAAACCACAACAATAGTGAAACTGTGCTGGGTGGTTCGGTGTTTATTATCGAATCTTTTAAAGTGAACGTGTGTTCCTTAGCAGCAAAATAAAACTGTCATGATCACGTAACTCAAATCCCAAACCAAACGCTCTACCCTGAGGCAAGATTATTGAAGTAGAAACCCCCAAAAGCGAAATACTATGAACAAACCCGTTAGAGACAGCAAGCGAAACGAGAATTGAGTGAAGTGAAGTTAAACTAGCAAAGCACACAGACACAGAAAAAAACACGCAACACACACACACAAACACACAGAAATGGAACAGT…
ASTF_00004148	XLOC_002179	494	132	1.1443	-0.601766	0.0355936	1	0	0	AAACCCCGTAAAGAACACGCAAAACCAATCTATGAATGTAATGAACACTAACCTAAAAACGCTGAAACCAAGTGCTTATTTTGCATCATTTGACATATCAAAAACGTAGTGAAGCAGCGGACGCCAGAGAATGAAAATGCTAGTGAAATTGGTAAACCAACCAACAAAACAAACAAACAAACAAATGGAAGGTGAAAAGGTGGTAAACACGGAAAGGAATGTTTAAAACATTAAAATCCGAGCAAAGATATTAACAAATTAGCTAAACAAACTAAGCAAGAAGAACAAACAAAAAAGGAAGAGTATAGAAAAAAACAGCAACTACTACTGAACGCCACTCTAAAACAATCTATCGCTTGAATGCCTTTCAAACCTATCGTAATAATTCATAACTACAGT…
ASTF_00004149	XLOC_002180	292	63	0.6479	0.0332732	0.0261423	1	0	0	AAGTAATAAGAAAACAGAAGAAATTTTCCTTCTTTTCAAAATTTTGCTCATATTTTATTTTATTTTCTCAAATTTGCTTCAGATAAAACATAAGCACAAACGGCTAAGATACATTTTGAGCGAACCGGCTGACAGACAGACAACAAGAAAAAAAAACGAACAAATTTAAAAGCAATTCAGGGTAAAAGGTTTTATACGAAATTACGAACAAAACAGTCAAATTCTGCAGATGGGCAAACAGCGAACACACACAAAATCCACGCATCCCGTTACCGCATATTACTACCAGTTG
ASTF_00004150	XLOC_002181	499	129	0.8651	-0.292839	0.0311852	1	0	0	GCAAAAGAGTTGTTAATAGTGTAGTAGTCGAAGTAGAAGTAGTAGCTAATGGTTGCAGCGCATCACGCATCACGTTGCGCATCGTTGCAACAAGTTGAAATGCAAGCGACACGTGCCACATCGATACTGCTTCGGATGCAACATGCGAGTGTGTGTGCAACAATTTCGCGTAGGTAAAGCCATACATTTCCAAACCCTCAAAACGACACTAATCACAAATTTATACACACACACACCAAGAAACTTCAAATAAGAATCGATTTTGCTAGTTTAATGCACCATTTAATGTCCCGGAAGGGTGGGGCAAATCAGAATCAATTACAAAGCCATAATTCTAACAACTTCACACACACACACCTAAACATACACAACACACAATGAAAATGTACTAACAAAAAA…
ASTF_00004151	XLOC_002182	968	96	0.9155	-0.703763	0.00557852	1	0	0	GCAAAAGAGGAAAGAAAAAGAAACAAATAAAACTTTGCTATGTAGAAACATACAACAAACAAGCTTAGGAAGGAGAAAAACAAGAAGAGAAAAAACACAAAAAATAACGCAATTAAAACGCAACGCCAAGGAAAAAGGGAAACGAAAGCAAACAGCAGAGGAAACAAAAGAGCTAAGCTTCAAAACCTTAGCACATACACAGGAAAAATAGGATTGAAAAGGAAAACAAATGGAAGAAAAACACAAGAAAAAGGATAAATTAACAAATTAATGCTTGCATAAGCAAAGAACAGAGCAAAAGCAACAAAGAAGAAAACACACAAACACATAAAAGGCATACAAAACTTTGTAAATCATACCACACAACAAGATGTAAAAAGAAAAAGTAAGAAACAAGGG…
ASTF_00004189	XLOC_002203	454	180	0.8803	0.0348873	0.108799	1	0	0	CTGCGTTCCTATGCTCCCGTCTGCAATTGGATGCGCTTTCTTCGTCTAGCCTTTCTGTGGCGTCAACTGCTGCAGCAGCCTCCTTTGTGGGCACGAAGAATTATACGAATATGGTTGCACTCTTCAGACACACACACAAACGCACAATGATGTTGCAAGCTTTCGATATAACTTTCCACCACAAAAACCAAGCGCGACCGCTAGGAACAAATGGAGAACCAACCTTCGGCACTGAAAATGCGGGTTGCTTTGATGCGCTACGCTTCTGAAAACAATGCAAGATGGTGACCACCTGATTAACACACCGATACAGCACCGTATGTGTATGTTGCCACACACTATGATACGCGAGGAAACGGCTTCGACCATACAACACTACGCACCAGAAGAGACAGACTC…
ASTF_00004213	XLOC_002215	2794	237	0.6641	-0.432106	0.001486	1	0	0	CTGCTGATGCTGCATGGCCGACTCGCTCGATCTGTGTGTGTGTGTTTGTGTGTTATGTGTACGTTGTCCGCATTATGGTACTATTGTTTATGCTACAGTTATTGTATTTTTGCGTTTTTTGTTTGTTTGCTTCTATATGTAATTTATACTCAATTGATTCGAATATTAATAACCGAAAATACAGTAACCCGCCGAACGGATCAAACACACAATTTATATCTGACTTAATGGAGGAAAAAAAACGTATCCGAAATAAACTTATTCCGTAGTCCGTATCGCAAAAAGAAACATTTATAAACTTTAAACTGTATTAAATTAAAAGAGAAACACTCACCCCAAAGTAAAAAAAAGGGGAGAAAAGAGAAAAGCCAATCAATTAGTGATAAAAGGTAGAGTTCC…
ASTF_00004214	XLOC_002216	286	171	0.8567	-0.15274	0.0779433	2	0	0	GGACATTTTGGTAAGGGCTGATGCATTCTAGAACGGCGTCAGGAACTGAGGCGCAGCTTCTATGACAAACCGCATCACAAAAACAGCAGCACAGCACATCATTGGCCACGGAGGCATCTGCTGCACAGGCCGAACACACAGGAGCCATTTACACACACAGCGCAACACACAAGCCCACGGAATAAACAACAACAAACAGCTGAGCGACGCTAAACAAAATCGACCAAATTAGGACACAAACAACAACCGTTAAAGCAAGGAGATGTGGAGCCGATACCAAACCTTA
ASTF_00004291	XLOC_002257	1475	381	0.6395	-0.631247	0.0179652	1	0	0	TTTTTTATCGCTTATTAATTATATTTTTGAGATGAGTTAATATAAGCCTTTTTTTGTTACCCCAATTGTGTAAATAATGAAAATCTTGCGTGTGTATAAATTTGCTGTTTCGGACGTGTAACTAATCGCCCCTCGCTAACGAAAGTGTGTATCCAAAACGAGTTCCGGAAGGGAGTTTTTTTGTTTGTTTAAAAGTATTCTACTGCAATCAAAAACACGTTCGAGTGCGCACTGTGGAACAAAATATACAAACAAAATGATGTATCATGCAAAGAAAAGAGAAAGATCAAAATAATGAAACTGCAGAAACCATGCACAACAACACCACATTGATTTTGTCACCCGAAGGTGGCAACGAGGCAAGAAGAAATGCCGTGAAGTGAAACACAATAACTAGCT…
ASTF_00004300	XLOC_002260	700	105	0.811	-0.935745	0.00367126	1	0	0	CCCTTTCTCATGCTACTAGGCCGCGCCCCTTTTAAAGAAAGTGAGCAAGCAAGTAAGGACAAAAAAGGAAACCCCGTATGCACATTGTTAAAGTTTAGAACCGCATTGTGTAGTTGTGTATTGCTGCTGCTGTAACAAAAGAGCAGAACAAAACAAAACCAATATCAATGCATCGCGCTCGCGGGATCATTAATCTAACAAACTGAAAATTGTAAAGGTGTGTAAAGGAAGGATCAAAAGGTTCTACAGCAGGAAGAAAAAGGAAAGAGAATGGCGAAAATGCTGAGCTGGCATCGATTGCAATAAACAACACCCAAGTGCGTGCAAAGCAAAATGCAAAACTACTAAATGTAAGAAAGCCAACAAAACATAACCAACCCCGAAACACAATTATCAAAA…
ASTF_00004351	XLOC_002278	713	231	0.8757	0.0550218	0.122621	1	0	0	ACACTGCCGTCAGTTTTCGGTGTGCGTTTGGCCGTGTTTGGTTGTCGTTCTTCGCTCGGTTCGTCTGTTGAAGCGAACTACTGGCACACGCACCCTACTGTTCGTGGCAGCAACAAGTTAGCAGGATCCTGCCAAATTCTGTGTCCCACAGTGAGTGAAGAATTTGGACACCAACCCGCCGGAAGCAAATCGAGTGGAGTAGTGTTAGCACCTGCCTGGGTGCGAAAATTCGCACGTGTCACACACCCGCGTACATGTTGACGGCTGATAACACCCGCCAGCTTCAGTGTACGTTTGTGGTTGTTGTGACAAATGTTCGGGCATTCGGTGCACCGTAGCTCGTCGCCAAGGTAACACAACCACGCAATCCAACCTTCCAGCTTTCGGTGCTCTATCTCA…
ASTF_00004355	XLOC_002282	978	159	0.9979	-0.11946	0.0469792	3	0	0	GGTCGAGCTAATCCTTGCTGCCGTGAAGCCTCGTCGTGTGTGCAAAATGGGTTACAAGATGTTTGTGAACGGTCGTACGAACTTGAGCAACTTCTCCAACACGCGCGGGGCCCGCACAGTCGTAAACCGGAAGAGAGCCTATGGCAAGGTTGATCGTGATTCACACACGCGGGTTTTTCTTAGATCCGGATATACTACGAGCTATTAAGGATAATCCGCTAGATACATAAATTCCAGATGTGATGATATCTTGTTCAGCGATTGATGGTAAGAACTTAAAGGATTTGTCAGCGAGAGGGACATTGAGGAGCGATTTTATAGTAATGAAATATTAAGACAGAAGTAGCAAAGCCCTTCGTACGGGGAGGCGGTCTGGATGGGATTTGATCCTCGGTTCTG…
ASTF_00004388	XLOC_002301	6234	474	1.0586	0.0772661	0.00126305	2	0	0	AGCCCGATGTTAGTTTGTGCGTTTCAAGTCATCCAGTGCGGACCTCGTTCACTATAGTAGCTATACGCGGTGCAATGGTGGACAGTGAGGCGGGTCGGAACTATCCGACCTCCAGAACCGGTGACAGCATTGAAGATCAAGAACCTAGCTTGATTGATCAGCTAACCAAAACGGGGTTAGAATCCATGCTGGAGCAGGAAGCAGATATTCAAGGCCCTCTTTGTGAGATGGAGCGTTTGTTGGATAGTGAAGCACACGATTACGACACGATCGATGCTACAGAACGTGCAGCGCTGGCTAATTTGGCCGACAGTTGTGGTATACCTGTCGTCCGCAGGCCTGGAGGAAGCGGTAATGTTCCAGAACATGGCTAGCGCAATGGTTGCGTTGAGTGTCAGA…
ASTF_00004401	XLOC_002307	1535	135	0.6881	-0.397592	0.00383795	1	0	0	AACAAAAAATGAAATTTTCAACTCCTTTAAAAAAACACTTAAAAGCACGTTGATACTTCCTGGATGACCAAATAATTTGGTGCTACGTTTAAGCTTGAAAATCAGAAACCACACACTGGTTGTAGTAAAAAGCGTCACTAACGTCACTCAGTCGATAGTGCACAAAATGCTACCGTCTGTACAGTGCCTGCTGTGATTGGTGCGTGTACCCACTAGCGCCACTTATTCGCCTACTTCTCGTCAGCCAATTAATCGTTTCTCTCCATTTGCAATCTTGCAACCAATAGATTTATGCGCTTGTTGAGCTTAATTTTCTTTTCTTTTCTTTTTGTTTCATTGTATTTGCTGTTAACCACCATGTTTTCATTAGTACGACCGCATATCTCTCTTTTGTTTTCG…
ASTF_00004415	XLOC_002315	581	294	0.5784	-0.72556	0.0185316	1	0	0	ATTTTTTTTGCTTCCGTTTTCGGTTAATTTTCTTTCGTGAGGTCCGATGCACGGAAATAAAGGATGGAAAAGGGATTTTTTTTCTCGGTTTTGTTTCCCCAAACCTTCCAATCATATATCTGGGCCAAACAGCAGCAATCGAACAAGGGGGAAAGAAAGAACACAGAAGCACCCCTAGGGAAACCCAAAATGAATGTTTGCTGTTATACTCTATAGTAATGTTTTGCATTAGATGTACTGAATGTTGGAAACCTCACCCCAACCCAAAAGCCCCTCGTATTTGTACCATTTTGTAAGTTTCGTCGTAAGCAAAGACTGCGTAAATTGCGTGCGAGAATAAGAGAGAAAGAGATGGGGAAGGATATGGCAAATAAGGAGAGAAAAGGTACCGTTACTGTG…
ASTF_00004416	XLOC_002316	475	99	1.0135	-0.178427	0.0495297	1	0	0	TAAATTCTAATTACATTAGAGCGAGCTGAGTTTGGAATAGAAAAATCCCTTCACGAGACCCCACGCACAGCATCCGTTGCGATTCATCCTTGTTTTTTTCGGGAGGCATGAATTGAATTTTATCTACGAAATTCGATAACTTTTCCTTACGCCTGTTCCCTCCCAAACTTCAGCAGCAAATCAGCTCGGTACGAGAATCGTCTGATGTAAGCAAATGAAATAATGTTATAATCCTTCCCCTTCCTGGTGGGTCCTTTTCGCACACACACACAAACTTTATTTTATGTCCTGCACGTCTTAGATACCTTACCGGGACGAATTCACAAGAACGGCAGGTTGTTCTTCGTGTGGAAAATTTGATCTGGGTAATTATATTTTCCGGAAATGATAGCAAAAAAC…
ASTF_00004432	XLOC_002322	630	390	0.6571	-0.0970514	0.18793	1	0	0	CTATTCGCAGAGACTCAAACACGAAGTCACGTGTCCTGACAGCTCGCTTGCGTACATAGAACACCGACGCCTGTAGATATAATGGTTCTCATAAATCTTCTCTCAATCGACCACCGATAACCACAATCGAATGTGCAGCAATGACCTCCAGCTGGACAGATTATCTTCCCTTCGATGAATATGCGTGATAAGGTGAACCTTGATGGATTAGTTTCGGTGTGATAAGTGTGGGTCCATGGGCAGTGTGTGAGTGAGGGCTTCTGCTGCATCCACCAAACCCGAGAGCGTACCATCAGGGTGCGCGCCTTATCGATTGAACGATTAGCTATTGGCAAAATGGAGCCACCTCCGGCCAGTGACAGATGCAGTAGTTTCCCGTACCTGAGACTTGGACTGGGG…
ASTF_00004434	XLOC_002324	3179	237	0.6604	-0.5022	0.000740871	2	0	0	TTCACTCGTTAGATTTAAGCTGGTAAGATCAGCGCATCCTCTATCCAATGCCGCCTAAGGGGAGTGCGTGCGTGGATTTTGTTTTATTAATGTGTGTACCGCATCATCCTTTTAGGGACGATTTTCTCGATTTTTGTTTTATACTATCACATCCTGCCCTCTCTTTATACTCCCTCCGTTTTTCCTCCCCCTCCGTCTATCTCGCATTACTATCTCGTGCGTAGTTAGGTTTAACGTTGGCCCCGCTTTAAAGACCGAAGAGCAAAACGACAGCAAAAGCAAAGTTCACGAATCGCGTCGCGACAGGTAATTAATTTTTTGGTTATTGTTTAAGCTTATCGTTTAAGTAATTGTGGTATTAGGGGTTAGTAGTGTCGTTTTTATTTTCTCTCTCTCTCT…
ASTF_00004459	XLOC_002334	1294	324	0.5366	-0.318645	0.0212798	1	0	0	TGTAGTGTCAGTGGTTGTCAGCGCAGCGAACGCGCGCGTTGTTAGATTAGCGAGAACAGAAGAAATTACACCGAACGCAGCTCTCCGATGAGATCGAAACCCCCAGGTTGTTGAATGGTAAAGGCACTGCCCGTCCCGAGTGATGGCAAAGCAGCAAAAACAGAAAATGACATGCCAGACAAACAATAACTCGCTCAACGAAACCAAAGCAAGCACGAGGAGGACGCGAACGAGTCGATGCGTTTTAAACGATCTCGAAGCTCCCGGTTTTTGGCAGATAAAACTCAATTTTAAGCTACACACCCCCTTCCCCTGTTCGGTCATTCGGCAGCATCTGAGCAGGACGAACCGAGCTAAATGTTGGATTCGTTTTAAGCAATCTCCAAGCCGTGTGGAGGT…
ASTF_00004477	XLOC_002345	1173	267	0.4211	-0.361662	0.00979169	1	0	0	CACCGGTGGCTGCAACCCTTCGGCATCGATGTATATTTTTATTTGTAACCCTCCCGCTTGTGGCTATATTTTACCCACCACGATTACTACCACGCGGAACGGTTTACTTTGCCATCACCGAGAGGTGCAAATGGGATTGGGGACTGGGGACAAATTGAAATTTCTCTCCTTCAAACACAAATCTTCTCTCCTGCCAGGGGGACAAGTTTCAGGGCCACATGCAGCCAGCTGGCTGCCCGCTCCTGCTAGCACGGTGTCCGGGGCACGATTAAATCGGTTTTTATGTGATTTTTAACCCTTTTCCCTGCATGTCGAGCGCTAATGAAAAATCGTGCCTCGGTTTCGGCTGTGGTCCGATACAAGCTTCTAATGTTTGTGTTTGCAACACCTGAACAAACG…
ASTF_00004479	XLOC_002347	231	42	0.5827	-0.600983	0.00441816	1	0	0	AATATAAGCACTTAACGTTTCCATATTAAGGAGTTTGCTTTTACGGCTTCCTATACATTTTTCGAAACAGTAACAGAAAACAGGTTTATATTTACAAACAAAAAAAAAGCAAAAACTCGAGGAGATATATACAAATGATGTTCTAGTAAGTTGGGTAGAATAAAAATTGCAAGTCTTATTATTATTTATGCGTATTTTCAAACACGCACTGCCTTTTTACTTTGAGTAAAA
ASTF_00004480	XLOC_002348	673	237	0.8924	0.0426056	0.137023	1	0	0	CACCCACAGGAGCTCAAGCGATGAGAAAGCGTGACGTAACATGAAGCTGTTTAACGAAGCGGCACAAGCGATGAGCACACCTCCACCACGAGAGTGTATGCTGTTATCAGTACTTCGGTCGCAACGGTATACGATGAATTGCGTGTCAGCTAGTAGTGCGCTGGGTATCGATTCGTCGAGCCAGGTTTCGGTAAGTACCAATACATCGAGATCAGCCTCAGATAATGCGAGTCGGGTGTTGTTCAGCTTGGTGCGCAGTCCTCTGACGTTCTGGTAGTATAGGAGAAGCTCTAAGTTAGGAGCCTGTGCATGTGTCGGCGGAGTATCACGGAGAACACGTGTAGTTAAGGCAGTGGTGGCTCGGGCATAGTGGCGTGGTGCGGATCGGAGAGCGGCGGA…
ASTF_00004481	XLOC_002349	1083	150	0.6082	-0.347246	0.00713309	1	0	0	AAGCATTTTCCTCTGGGCTTCTTCTAACGTTTTTCTTCTATTGTGACATTATTGAGTCAACCCTTCTTTCAGCACCTTTTTACTTACAACAACATTTTTTAATCCCAATTCTTTATAAAGAGATAGAGAGAGAGAGAAATTAAATTTATAGAGAGACAGAGAGAGAGAGAGAATGGTTCTCAGTAAATTATCAACCAATGGACAATAACGAAAAGGCAGAAAAGATTTAAACTTTGCAAATTGCATCGAAAAATGTTAGACAACTTTATTGGAATTTTAGAAATTGGATAAATAATCGATCTTAACGCTAAAATCTAAACGGGGAAAAATAGAAACGAAAAATATTTTTTTTAATTTTCTTAGTATGTCGAACGGTCAGGGCAGCTAGGTTTATACACC…
ASTF_00004483	XLOC_002351	838	252	0.8339	-0.102917	0.0794526	1	0	0	TTTGTTTAATTTATTACCGGTTCGTTTTGGTGAGATAAGGGGCGGAAGTGAAAAATGGGGCAGATGAAAAAAAAACCAAAAAGCTAGTCCAAACGAAAAAAAGAAAGAAAACAACTCAAGGCTCAATACTTGGGGGTACGGTGCGAACTTATGATGGGTGAGAGAATTAAAAGACTGTGGAAACACTATGTACAATATCAGATTCGTTTTCCCCACGGCCAGTGGGGGGAAACACGGGGTCTTCATTTTACGCTACCTGCCTCAAACGCCTGTACTTTCCTTTTCTCTCCGCTACCTTCGAGAGATCCCCACAGTGCAGCAAGATTCGGTAGATTACGGGGATTACGTTTACAATGAAGCGACCACCATATGTCAATTTTATTATCATTTCTTGCCTAC…
ASTF_00004484	XLOC_002352	688	144	0.7553	-0.098582	0.0314599	1	0	0	GCACCTGTACCCCTCCCAAACGCGACACGAGACGCATCCGAGACACGAACATATTTTCCGGCTGTTTTCCCAGTTTCCCCCACAAACACAGTGCGCCGGACAGAGAAAGCGCTACATCGCACACAGCCTCGCGTACCGAACCTGGCAGTGTAAACGGTGCCTAGCCTCGCTTGCCAAAGTGAACAGCGAATTTCCCCTTCGGATATCATTTTTGTGATGCTTCCTCTCTTCCGAGTTCTAGACAATTGCTAATAATACCCGTGATCGCAAATTTTCTTCCGTATCGTGATATTTGCAATTGGTCCGTGATAGTTAGGATCGTCGCCCGGTAGTGCGTTTTGCCCAGAGAGAAGTAGCATTGTGTGAACCCGTGTAGGCGGGAGGGAGCGGCGATGAAAA…
ASTF_00004486	XLOC_002354	1662	162	0.4845	-0.348256	0.00251318	1	0	0	TTTAAACGCTCTTTTCTTCCACTTCGTGCTGCCGTCAATAAAATATAACAGTACAGTTTAAAAAAAAGGGGAACCTTACATACTAAACGCTTGTTTTTTTTTTGTTTTACTTCATCTGTTACGCTGGGTTTTACTTGTTTTTTTTTGTGTGTGTGTTTTTCTTACGTTTAATCCATTTCCAAAAACGCATTTTTTTTGTGTGAAATTCCTTTCCTTCTCGTCTTCATCAAATCAAACCATTTTTTTTTTGCTCGCCGCTTCATTCGCTCTTACCCAAAACGCTTAACCTAACTCAGATCGCGTAATTACTAAAGACTTAACCGCTAGTTTGTAATTAATGATTTAAGAAAAAAAAGGTAGAACAAAAATCACATACGACCACCATTAGAGGCGCGATCA…
ASTF_00004492	XLOC_002360	1129	78	1.1204	-0.339611	0.0165459	1	0	0	GAGAGAGAGAGAGCTTCCAAAGCTCCTACAACCGACAGCAACATTCCATTGTATGATTGCAACTTGCCACAGCGGGCCTGCAATGGTCCACTATCCAGAGTTGAAACATTTCATCGGGTGATTTAAAACTTTTCCCCTTCGATGATTCGTAACCCTGTATCGTTTTAAACGATTTTAGATTTTTATTTTGTTTTGTTAACGCTATACTGTCATATTGTATTAGACACATGTTTAAGTCCTTTTGTTGTTGATTTGTTTTTTTGTTGTTTTTAAAATTGAAATTATAATTCACTTCCGGCTTAGGTTACATCACTACATCAGTATTGCGCTCTGGTGTGTGTGAGGTGTTAATCAAACGAATGACGATAATAATATAAAAAAAAACAATGGGAAAATACA…
ASTF_00004494	XLOC_002362	1427	240	0.5605	-0.46577	0.00651143	1	0	0	CACACCACCCCTCATCATCAACATAATCATCCAACAGCAGCGCTCGAGGGCTGAGAAGGTAATAAGGATTTGCCTCTTTGTTTGCCTTGCTTGCTTCTCTTAGTACATGTCGGTTGGTTTTTTTTCTTTGCCATTTTCCTTCACTTTTGTTATTTTTTCCATCAGTGTTTTTTTCTTCTTCTTCTTCTGGTGGAATATTTGCTCCTTGTGAGTTTTGTATCATGTGTTTCAATATAGCTTAACAACTATATGTATATATATATTTTTCATCTTCACATGATTTCTACATTCTGATTTGTTACACTATAATCGTACATGTATGTATATATATATATACTCTGCCAACATTACCACAAAAAAACTTAACAGTTACAGCGTCTTAAACTCGACCAAAACGAA…
ASTF_00004495	XLOC_002363	3257	162	0.778	-0.287789	0.00081121	1	0	0	AGGAGTAAATAAAAGAAAAGGAAAACAGAGAAAGAGAAGAATAGAATACGAAGGAAAAGGAAGAAGAAGGGCAGGACAGTTAGTGCGTACTAAACTTATATGCGTACTAAATTCTCTTAAACATCTAGCTCATCCGAAACGTCAACAGTGGGGAAAGGAAAAATAGAGATAGAAAGAGTGTGTATGTGTGTGTGAGAGAGAGAGAGAGAGAAACCATAATCGTAAAAACGTAAACACTAGACAGAAGAACACTCTTCTGGAAAACACATTAAGGTAAGGTACCCAATTTTTTTGTTTGTTTTGTTTGTTTGTTTTTGTTTTCTTCTTTCCCTTTCTATCCTTTTTTTTTTCATTACGCTTGTTTCGATTCCGTTCTTTGCTTTCCTTCTTTTTTTTTTC…
ASTF_00004496	XLOC_002364	567	288	0.5832	-0.24611	0.0544603	1	0	0	TTCGGGTCACCACAATTAGCGGACCGTTCCGTTTCGCACCGTTTAACCGGCGGACCGTTCCGTTGGCCAATGTACAAGCACGGAATAATTTAATGCGTGTTGCTGGTTGCTTGCTACCAACCCGGCCTTCTGTACACCGACAGGATCAACCAATCGGACCGTTATTATCGCAGCACTCCAGCATCCCCTGCCGTGTGCATAACGCACACACACCTGGACAGCTGGACCTGGCGGTGTATTTTTTGGCCGGTCGTTATAGAGGTGGAGATGAAAGGGAAGTTTTGATGTTGTTGGTTTCTCTGGTTTTGTTTTGGACCGTTGTTGTTGCATGTATATCGGCAAACTTTCAGAATTCAAAACACGCGATCACACGATGGTGATGGTGAAAAACGGTTGATC…
ASTF_00004497	XLOC_002365	903	264	0.7289	-0.1487	0.0544844	1	0	0	TCAGATCGGTTGGGTTTTTTTTCCATTTCGGGGTTCCGTACACAAAAGGGGGTTGGGTTTTCGCCTAGCAGCCCGTTTTCGAGTGTGCCTGCGAGAAGTAGTAGTTTTATGTGTGCAAAGTCGCCATTTTTTTCGCCCTGTTTGCTGCTGCTGCTGCTAAGGGCTCCGGGGTTGGCTCTTCTCTCCCTTTATACATATATTCGCACTTGCCAATTTACTGGACGTATTATGACGTAGTAGGGCGGACGGTGTGGCAGGTTTCGTTCGTACGTTCGTAGGGCATATCCTTTGTGCAAACGTTGCACAAGGGTTCAACTGGCAGGCCAGTGTGTGTGTGTGTAGATTTTGCAGAAAACCGCCTCAAGAGTCACTCTAGCGTGAAGTGCAAGGAAAACCGTC…
ASTF_00004556	XLOC_002400	767	231	1.0962	-0.166631	0.129415	2	0	0	ATAACCACAAAAATATGTGCCCGTGGCGAGGAATAAAATATCGTTCGATCATCGTGTGTGATGGCGTTGGTATATTTCTCCATTGCTGATGAAAAACCGGTCAAATTTTGCATGATGATAACAACTTTCAGAGCCAATCCAATGATCACGATGATATCAACCATTTTGTCCAACTATCTGACAAATTTGCCGGCTTCATCAAGTAGAATGTGTATGAAATGTACCGCGCACACTAGGACTATGACGGCAACGGTGGCGGCGGATATCCCGCCCAAGGCCCGGTTGAGTTGAAGTATATCTATCTTTCCGGTGTGAATATATCGAGTATGCTTACAGTGATGTGCTTCTGTTGTCGCAATTATCAGCGAGCACGTAAATGTTTACCGGTCATGCGTTTTT…
ASTF_00004590	XLOC_002418	215	117	1.1672	0.160927	0.234837	2	0	0	TGAGTTGTTCATAACGTATTTTATCACAAAGTCGCTATATAAAGAACAGCGCTCACACACGGTTCGCCTCACAAAGCACCAGTTTAACAACAGGAAATGGAAGAAAGTTTAGACGCGATAGACAAATATGCGGCCATGATGGTAGAACTCATGCAGATCGTGTACCCTTCGATCGAATTTACGGTGCCGTTCGATATGCGTTGCATTACTTGCAG
ASTF_00004600	XLOC_002422	4189	291	0.8176	-0.121995	0.00120176	1	0	0	CTTGCCTGCCTACCGAGCCCATCTCGCTTCACCAATTGTGCAATCGATCGATCCGTCGAACGACCACCACCACAGATGGCAAACAGAATCATCCACCTCGAATCAGACGAAAAGCTATCTTCCCAAAAGAGGCAATATTCGGTGGTGCGGCTGTGTTGGCTGCTTCTGGTGCTCTTCCCCATTTCCACACCATCCGGCGGTGCAGTTTTGTTCTACCGCGCAATGCGGTGGACGCCTATGAGACCTGGGTTTTATGGACAGTCGTGACTTTTATGACCAATACGTCGATAGCGTGCCTGAATCCGGTGGGGATTGTAATTTTGTTTAATTTTTCCATTGTTGTTCCCTTTGCTTTTCATCTTCCCTCGGGTTCGGTCGGTACCGTGGGCAACCCCAGCC…
ASTF_00004642	XLOC_002444	1947	237	0.7576	-0.479364	0.00549174	1	0	0	AAAATATTTTTTCCATTTTGTAAGCTCTACTTTTATACGTCATAATGCGCTTAATTTAACAACTCGTTTGTAACTGATAATAATTTTAAACGATTTCATGCATGCCAAAGCCTCCATTAAAAGAAGCGCCATTTTGTTTTTCGGCTCGTACGAGAGCGTCTACACTGTAATATGTGCCATAGATTGTGTTTTCCCGTTTCAAACACACACACACACACTGCCTGTTTTGCTGTTAGAAATTGTCGGTTTTTTGTTTGTTTGTAGAGTTCGTAAATCGGAGGTAAGAATAACAAAAGCCAAACAGGAGGAGAAAACCAAGAGAAGAGTATATTAGAAGAGACAAAAGGAAACAAGGAAGAAATCATTCAAGATGGGCCCAACATGATTGACTACTGGTAG…
ASTF_00004656	XLOC_002453	364	75	0.8635	-0.307855	0.022495	2	0	0	CGCGGTACTGTGTTGTCGGACGAGTCGTGTCGGGCTCTCGGTGTATGGTACGGCGTACCATTACGTGTCGTAGAATCGTTTGGGGTTTCACGGGGCATATCACGTTGATGTGCGGTTGAGTGCGTGCGCTCGATCGTGCTCTGGCGGTGCTTGTTACTTCCACTATCAACGGTGCGATTCGTTTCCAGGAGGGTGGTGCATAGAGAATCGTGCTTTTGAAAAAGGGTGTTTGATTTGTGGTTAATATATGGTGTGGTGCACATAAAAGGTGTTAATTAAAGGTGGAGATTCTTCTCATATCTGGAGCACTAAGTCAGTCCTGGGAGGAGATCTTCTCGGTGCACGATAATCGTCATCACAAAGC
ASTF_00004697	XLOC_002472	4757	375	0.429	-0.459614	0.000165211	1	0	0	CGTGATCGTAATTATTTCTAATCAATCAAAAAGTAAACACAGCACACACTGCCACTTGTATGCAGCGTGCGCTACGCGACAGAGCCGTGGGTGAGTGGCGCGCCGCAGCGGACGAGAACTTTACTAATGAACAAGGTGAGAGCGATTCGCACTGCTGGAATTTCATCGCTTAGCCATCTCCTAACCAACATGGCCGCTTCGAAAACCGCGTCAACCGCGAATGAAGAGGGTGTCCATTATCTTTACACTAAACCATTGGCCGGTACATGAGTGGAATAATGAATGGCATCGGTGAAGATCCGGACGCCAAACTCCTCCGTTCACCATTGAATGGGCAGTCGCGTCGGACGACGAAAACACCGTACGACAACACAACACGGCTATAGAGGAAACACACAA…
ASTF_00004698	XLOC_002473	223	81	0.8507	-0.169762	0.0377007	1	0	0	GAGCTGAAAAAACTACTAAATTCAATCAATAACCGTCATTGAATCAACGTGTTTGCCTGCTTATGACCAGACCCGGCGGTCAAACGCCGTGCTGTTTGGGGTTGCGGTGGAAGAGAGGTCGGAAAATGTGCACGGGTACATAGTGCAGCAAAACAGCGAAACCGTCGTTTTCGATGCCCGGGAGCGATAGGCGACGATGTGTTTAGGTGGTCGGTTAGGCAGC
ASTF_00004699	XLOC_002474	731	165	0.5177	-0.515794	0.00670842	1	0	0	CCTTTCAAGACGATCTTAGCAAACATGAGCCCCGAGTGCCACAGACCCACCTTCCACCCTCTGCACACACGCACAGGCCCGCCGAAGTTTTGTTTTTTTAGCATTTAATGAATAGTTGCGCTCCGTACGGGAATGTTTGATGGGAGCAGCGGTTTTGGGGGATGTGTGTACTTTTCGTCAGGTTTGTTTTTCCTATTTTTTTCTTCTATGTGTAAAGTGTACTATTCGTTAGCATACGCGTACATGTGTGCATCGAATGTGTGTCAGGCCTTTTTTGAGACGAATCTGGTGAGCCTTTGGTGGAGCTGATTGAAGCGGACGAGAAGGGTGGAAGAAGAAAAAGTGAAAACATATTTAGTACCGTAACTGGGCCTAAAATACTTTAACCACACACACACA…
ASTF_00004709	XLOC_002478	1277	207	0.9168	0.170804	0.0727995	6	0	0	CCGTCAAATGCAGTTGTGTGTGTGTGATCATTTGTGTAGCGACATGGCTACTTCGAACACATTTCTTCGCAGTTTACTTTCGTCCTTCGTACTCGCCGCTGTCATACGGCTCAGTGCTGTGATCAAAGTGGATTGTTTACATCGAGAGATTGTTGAGAAAATATGTTGCAAACAATAAAATTTCCAGTAAAAAGCATATGTGATGCGTCAGTGAAGAATAAATCGGATGATTTATCGATGGAGTACGATCACAGGTGCATCCTGGATGAGGAAACTTCGGAAGCAAACAAGCGGCGTCTTCCCGCGGTACGGCATCATCACAATGTCCATATCGATGCACAGAAGACAACTGCTGGATAAGTCTCGTCGATTGATGCCGACGATTACGTGCAAAGTATA…
ASTF_00004715	XLOC_002482	748	207	0.5438	-0.202457	0.0212617	2	0	0	ATGTTCTGCTCCATCTTCCGCTAGTTGCGTTCTGTCAGCAGATGCGGAAAAAGTGGCGTCGCGGAAAAAAGTGCTCGTGAGGAAAATCGGATGCGTTGGTTCGTTTCGTGGTGTGTTTAGTGAGTGCTAGTGGTGTTAGTTGGTTTGCAGTTGGCTGGCTGGATGTGATTTTACATTGTGATGTGTTTTGGAAGTGTAACCGTGCTGTAGTGGAACGCTTTTCCCATCCCACTGGCTGCATATTTGTCAACAAACCGAATAGGGTGACCAGCGCAGCAGACAGTCAGAATTGTTGGGAAATGCAGGGAAAATCGGATCGGTTCTGAGGAGAACCCTCATGGTTACTCGGATGGGTACTCGGATCGATGTAAGTAGATGTAGGAGGTGTTGGTGAACGAA…
ASTF_00004750	XLOC_002503	790	225	0.625	-0.195612	0.0302402	2	0	0	GTGCTGGGTTGGTGCGTCCGCGCGTGTGTTTCAAAAAAGGTGGTTCTTGTATTAAACTCTACGTAATGCAAGCGCGCAGACAATAAAAGAAAAAAAATCAATTCACTATTCAATCACAAAGTAATAAAATAATAATTTGCTGCAAAACGCAAATTTTCGGCAAACGTTTTCCGGGTTGCATTTGTCAATTTTGCCAAGTGTGTGTGTGTAGCCGTGTTTTGGAGTGAAACTATCTAGAACGTCCGGAAGGGTTGCAAAAGATCGGTGAACCTTCTGCCGAAGTAATCGTGTGCGTGTGTGTGCCCGCAAGGTGGTGTTGTGCGTGGCAAGCAGTCTTGCAGTAGAAAAATTACGTTTTTGTGAGTTTGGTGAGAAATTAAATAAGTCAAGTGCACAAAA…
ASTF_00004789	XLOC_002523	1734	357	0.9206	-0.0642679	0.0846954	1	0	0	TAGCAGAACCTTTAACGGATGTGGAGAGCAACCCTGTTTTAAAGCATGCGAAAGAACAGTCACCGGATCAGTTACGGAAGGACGTGCCGCAGAAAGGATGTGCCCAACTAACTCCAAGCAAGTCGACGCATACTGAAGCACAAGCATTCGATGTTCCAAAGAACAGTGCGATAAACGATGGGCCGGAAGATGAGCCACTGGTCAAGAGTGGATTTGATGATGTGGCAGCTGACACAACAGATCCTCCAAACACGGAAAGCACCAATGCACCAACGGTCGATAGTACAGTTTGCGAGGAGACAAAGGATATTGAAGCGAATGTATTTTTCGGGTTTTCCAGTGCGTCCATTGCGTACGCAGAGCGAGATTTTGAGGACAGATCGCGCACCATCGATCTGG…
ASTF_00004790	XLOC_002524	372	219	0.6847	-0.0288321	0.0844583	1	0	0	CCAAGAATCAACCGAAGAATCGTTCCGACTGCTCCACAGCAACGCCAGTTAAAGATTGTTCGACAACTACTGGAATGGGATGCTCACCCGACATCCGGGACAAGCTGCGTGCGAAGTCGTTATTTAATTTGAAGATGAAAAAGGAATCCGAGCACAGCGGACAAATTCCACGACAGTATCCTGGCCCTGTGGCCAATAAGCAACAAGCCAACGACGATGCTAACATACTTCAACGCGCTGCATCAACAGCGGGAGTGTTAGAACGGGGTATCAAAAAAACCGTTGATCATGCAAACACGGAAAGTAGCACCGATTCCGTTGTAGCTCGAGGAGTTGTCACTAACATTACTTCGTCTACCACACCTCATTCGA
ASTF_00004798	XLOC_002529	1799	213	0.6571	-0.791357	0.00192562	1	0	0	CTATAGGACAAACCCGCTAGAGGACCCCGTGTATCTCCAAACCACTCCAAAAACCCATGCCCCTCATTAGCCAGGTTTCTCTGAGCTGCTCAGAACTTACAACAACTAGATTTGCTTCGTTTCATCATCACCGCCGCGTTAGTTAGTTGAGAGAGAGAGAGTGATTTACGAAATTTTACATTATATCCCACCCTCCAAATGCCCACCAAGTCCCGCTCCCTGACGCTTACTATCAGGCTGCGGTTAGTGTGACAACGGCGAACAAACCGCTGCGGGCGATAAAGAAAAGTGTATAAACGGTGACAATTAATATAAAACAAAGTAATTTAAAAACAAAATAAAAACCGGATCGGGTTTACTGCACTCGACTAAAGTGAATAAAAAAAAAGAGAAAACGTA…
ASTF_00004821	XLOC_002537	812	384	0.6814	0.00281052	0.189511	3	0	0	AGCGCCTCTGTGTGTGCGAAAGAAATACACACCACACAAGGGGCATATCAGCAGCAGCGAGCAGCCAGCAGTAGCAGAAGCAATATTTCGAACTACGGCAGTGAGAAAAGTCGAGGAAAATTTTGCGGCCGTGTTGGTTGGTTTGGTGACTGATAGAAGCCAACACTCGACGGGAAGACACGGGTTATTCTGACTAACGAAAGCGGCTGCCTGCTAAGAAACATAAACTCTACCCTACCAAAATCAAAGCAGCCAAGGCTTCAGAGCACTCTGTACAGCTCGTACTGGTAGCATTTTCACACTGGGAAACCCAACCGTGCATAAGGAAAGGAGCAATGAATTTTTGCTTTCTGCGGCGGGTGTCGCCACCGAAATTTGAATTCCATTTTTCGTCAGGCT…
ASTF_00004827	XLOC_002543	1036	240	0.5802	-0.799871	0.00531509	1	0	0	ACACACACACACACAAAATGGGATTATGTGCAGAAAAGATAATTAAACACGGAAAAAGAACCATTTCTTATTTTTAATTTTTAAGTAAACGGCAACCTAGACAGAGAAAAAAGTGAGTGTGTGTGTGAGAGAGAGAAAGAGAGAGCGAGCGAGTGAAATAATGAGTTTCCTTAATTGATTAAATGTGCGTTTTTTTTATTTATACACTATAAGACAATTAAAATAAAAACTGATTTTAATACAACAAAACAAATAAAACAAGCAAAAAACCATAAGCATTGAAAAACAAATCACAACTTGCATTACGTTTTCTTTGGGAGGGAAACCAAACAGGGGTGGGCCATAGAAATGAAAGAAAATGTATAAAAAGGAGGCATAAAAAAGCGGAAGGAAAGAAAA…
ASTF_00004867	XLOC_002563	463	75	0.8832	-0.1199	0.0322494	1	0	0	GCTCGCACGGTATATCCTAAGTTCGGTTAGCGGCAGGGTTGTACAATACTTAAAGTGCGAGAAAAACATCAGCATCCTGTCGCCGCTGGCGGAATTTCACGACAGAACGATGTTAAGCTGTTGTGTACGCAAATCGCTGTTCAGCCTGTTTGAACAGTTCGTTTCAAGCGCAGATGACCAGATACGGGTATATGTTGCTGAGGTTCTGAGCAAGAACCGGCTATTGTCCGACGGTGCGTACCGAATGCGAATTTATCTCTACGAACAGGGTCACGTCCAAGTGTTTCCGCCTCGCGCTAAAAAAGATAGCCAATGCTTATTGTTTGCGGCAGAACGTGAGAGCCTGAAGCTATTCAAGCATGTCTTCAATCAACTGTGCGAACAGGAGCAGCTGGTTTG…
ASTF_00004868	XLOC_002564	618	213	1.0788	0.246906	0.281476	1	0	0	CTGCTCAAAACGATCGTAGACGAAAAGCTCCACTGGACAGACAAACTGCGGCGTCAGCATGGTCTGTTGGCCGTACAGGCCGTGTTTGGCAGACGGCACGCCGATCACCTGTGGACGCACGAAGAACGGAAGTATGCAACGAGCTTCCTGAGCGATCATTACGTGTCGTTGGCAAAGTCACGCTTACTAACAGCCGACCGTGTCGGCAGGCCGACCCTGTTTCGTAAGCGTATTTTCGCACATTACTTTGCCGCCCGTTGGCTGTTCGAGCACGTCGGTCGAGAACCGTACATGATGTCGGTTGCCAGGCAATTTTTAAATCCAAACGTTAGCTCGCTACAGTACCTCTTCAATCGGATGATCCTTGCCAACATGGCCGGCACGGATGCGTTTAATGTG…
ASTF_00004870	XLOC_002566	628	192	1.0612	0.106288	0.179184	1	0	0	GGCCATATTTATTGATACCGTAGATCCAACGAGCCTGCACCACCTGTACCACCTGCTGACGAATCCCACCGAGGCGTTCACCTGTGCGCACATTATCGTAACGATCCTGGACAAGGTGGACCGCGGCACACTGGCAGACATTCGGCAGCGAATCGCAGCTACTGGCGGCAGGTGTAAGCATCGTACCACCATTACCGTGATTGTATTGAAACTACCACCGGCACCGCCACAGGAATCGTCGCCGTGGGTCGTGGATTATCTGACGGAAGACTGTAGCAAGAAGTTGTCTGAGCGATACGGCACGCTAGATCTGCTTGGAATACGCACCCCGCTCGAGGCAGTCGTGTACCCGCGCGATTCTTTGGATCATCTAACAAATGTACTGGACGTTCACATCAA…
ASTF_00004882	XLOC_002570	256	126	0.5375	-0.538573	0.00904925	1	0	0	ACTGTGTTATAGAAATATGGCTCAAGAGAGTCAGGCTAATTCTACATACACTAGACTTTCAATCATTTTAATTGGTATTTCGGACCCAATTTCCTCATTCTTACGTATTGCTGTGCGCCAATTTTATCCAGTATTGTTGTAATCTGTCCTTGAACAAATTTCCTTCATACATGATGTCAGAAGCAATGACTTCACTTTTCAAATCCCGTGAATAAAGCAGTTTTTTTATACGGCTAATTTAACTAAAAAACAGTTC
ASTF_00004884	XLOC_002571	557	81	0.5598	-0.472528	0.0050807	1	0	0	TTTGAAGCATATGAGCACATTAGCATAAACAGCAAATCCTTGTTGTGCATGCAACAAAAAGGACAAAAGCATTGAATTATAGCTGAGCGTAGATGAATGAAGAAGAAAGAATATTTCAGGGATTTGAAGACAAAGATTGAAGAATATTGTGTGTCGCTAGCATAATGATGCCGCGGAAACGATGGCGCCTAGTGCGTGACTGAAAGAAGCTATCTTTGCGCAACGCCGATATCGTAACCGATGATGTACAACAGAGGTGCGTTAATAATTGCTTGTTGAAAACTAATACCAACATCCCGCCTGGCAGACGTGAAATAACGTCCACTATGGCAATTTTTTCATGCTTCGAAAGAGGCGACTCACCGCATCACGTATCCACACCTAGCAGTACTTGGTTGA…
ASTF_00004885	XLOC_002572	3396	216	0.8278	-0.463372	0.000830131	1	0	0	GGTGGTAAGACTTTTCCACACAACAAGGAAATGATCGGGATGAGACTTGCTATCAATTCTTTCGGATAAAGTCCGGCATTCACAACCTGCAACATCTATGCAAATATTTCGAAAAAGAATGCCAACCATCTTCTTTAGTCTATCAGAATTTCCCAGGATTGCACACGGATTAGAATAGGCTGAAGCTTTGTAGGGCCCTAATTCTCTNNNNNNNNNNNNNNNNNNNNNNNNNGGCCCATTTAAATTTGACTACTATTTTATATGTTGTGAAATGGTTTTATATCAAACCGGTGATGGCTGCTTGCTTAACTAAAGTCAGAACTGACGAGATATTGTGTTTAAAATATTAAGACTGCGGCGAATTTCAAGAGTTCACAGCAAACGAACGAAGCAATAGAA…
ASTF_00004891	XLOC_002578	668	261	0.8707	-0.109894	0.114336	1	0	0	ATCCAAAAGAATACACCGTTAAGGCTTGCTTCCCTACATGTTGTGCCCGGCAAACCTGCGAACCAACTAAAAAGGAAAAATAGCCAACAGCACAACAAAAAACCCAAAAAATGTTCTTCATAACACCAACTCGACACGTGGTTTCTTTGTAATGCCGGGTGAACTGATGCGATACATAAAACGCACGACCTCGGAATCAGCCTTGGTTTATGACTTGGCCTCTCCCTCCCACACTCACACACACACACACACCTACACACATGCCCTCTGCAACGGTTGTAAAAAGGGACATTTTATGCAACACAACCTCGACGACGTTTGTGTTTTTTTGTCCTCCCCATCGGCCTCATCCTCGTTTTTCGAACCTGTTTCGGTGGCGGAAAATGATATACGAAAGGT…
ASTF_00004892	XLOC_002579	547	60	0.9001	-0.683876	0.00715913	1	0	0	GAAACGTTTGTTTATCCGTGGTTGATTTGTTGATTGAATAAAATGATTTAGTTAGTGGATCCTTTTGCAGGTCGTTTGTTTGCTTGTGAAAGACCTGGGCGATGAAACATTCGTAATCGATTGAGCGTGGGAACTGTGAGCGTTAGTGCAAGAATGTACGAGCAACTTTTGTGGAGAACTTATTAAATTTATAGTAGACATGATTAAATGATAGACCTAACAATAATATTTAACTCGTTGTAATTCAAAAAAACACAACAAAGTAATGTGATGTGAAGCTATGTAACGGAAAGAACTAAAAGTATGAGTAGAATAAATTGAGAATTGGACGAAAGTTGCATTTCGCCGTCAGTTTCTAAGATGCACTGCGCTAGAAAGAATTATCGCTCTTTAGAAAAA…
ASTF_00004893	XLOC_002580	606	123	1.066	-0.408695	0.0353257	1	0	0	ATCGGTCTCTCAGTTGGAAGATATTAAGTGGATTACTAGACCCAGTAGATCCCCTTTACTGTACAGCTGATTTAGTAACTTTAGAGCAGATGAGAGAACCGATGGAATCACATATAAATTGAATGCACAAAGAAAACGAAAGCTAAAGTGAGAGCTTAGACGATAAGGTAAGGGAGCTAGGGATATTTGTTGAGCTAATTGAAACACAATTTTACTAGAACGATCGTGTTAGGCAATAGTTCGTTTCTAGAGTCAAATTCGTAACCACATTCAATGACATAAAAACCAAATTAAATAACCTAAGAATGCGACTGAACGTTGATAATGGGTAAGACGTTAACAGGGCCTACCACAAAACAGGAGCCAGTCAAACCACACACACACACACAACCTTACACT…
ASTF_00004894	XLOC_002581	158	0	0	0	0.00244794	1	0	0	TGGCGTCGTACCTGCGTCCGAAACTCACTGTCAACACGAACTGTCATCGGCCCTTTTCAGAGGGAAAATCTGTTGACGGTTTTCCTTTTTAAAATCAAACGAACAAATCCAAACGAGCGGCCGGGTCAGCGGCGGTATTGTTTCGGTCTTTACAATCC
ASTF_00004896	XLOC_002583	673	225	0.8236	0.235833	0.155169	1	0	0	CGCTCATTAAATGCCGCATTCTAATTAGCAATTGGAACTACGTAAAAATGCACTTCATCTACATTCAATATAACCCGAGAACTGATCCTTTACATCTTCAAGGGTCATCCCTTGAGGTGATTCAACAAACAAAGCCCATCGCTCATACAAACAACTTCAAAAACCACAGACTAATCGACCGCAACACTTTCCGTTGAAACGGGTCATTCGTTCGCTGGTGCGTGTTGTTGTCGTCTCGTCGGCTTCTGGCCAAAAGCCAGACCATCCATCACTGCTCCACCGGTAAGAAGTACAAAACACACACGAACACGCACAGAATTCTTTCGCGGTCACAACACAATCGAGATCGAAACGAGTGTATGTGTGGATGGTGAAAGGCGAATTAACTTCCGTGGCGTC…
ASTF_00004900	XLOC_002587	816	54	0.9308	-0.486837	0.00824307	1	0	0	CCGCCAATTATTTAAATTTTAATTGTTAGCTGTAAAATCATCCGTCCTCACTCACTTTACATGTGCGCCTAAAGCTATGCAACTCCCAACACACGCCATACTACAGTAACGCCCCAAAATAAACACACACATCAAACGGCGACAGCTATTTGTCTATTTAAAATGCACACGTACCCATCCCCAGGCTACCAACAAACATCGTAAAACATGGCGTACTACAAAGCACCTTAATATTGCACCCCAATTAGCGTAAGCCTCACGGCCGACCAGCCGGCCGGCAACCTTATCAAGGTGGCACTATTGTTTCGCACGAACCACACCGCTTATCACCGTGCACAACAAACCATTCACGACCATCTCGCATCAAAGAACCCTACCTTGCCCATCTTTCTAAATCAA…
ASTF_00004903	XLOC_002590	842	264	0.682	-0.367275	0.0313959	1	0	0	TTTGCCGTTCATTTGTTTCGTTCCGTCTTTTACTGGTCTCTGCCGCTCGACTCTCGTATCAATTTCGAAAATTGCTCTATAGACTTACATGCTACGGTAGCTCACACAAACCGCACTACCGGCGGAACCCCACAACACCCCCCCACGAGGCAGGTGTCCTTAGCTTCCTGTCCTGTCCTGTCCTGTGTGTTTCCCTTCCAAACTCATCGCCTAGCGAGTCCTTCAGCTTCAGGTTATCTACGGTTTCCTTGTCAAGTTTTGGTAGCTTTCCGATTCCTGTCCTGTATAATTGGCCAAGAGCTGCAATTTCTGCGTTCCAGTTTGATAATCCCGGTCCCTAGCCTCTTCAAGCCAGATCCGACATCTTCCAATCAGTTAAATGGCGGCATTCTGTTTTTT…
ASTF_00004904	XLOC_002591	874	93	0.501	-0.254131	0.0051796	1	0	0	GCCTTATAAAACAACAGGGATGTAAACGATGCGGTTCGGACTATCGCGATTTCGTAGTGCCACTTCCGATCCTCCGATGGACATAATGTATGAATCTGATAATTTCTCTATTTTGATATAGGTATCTATGTTAGTATGTATATATAGTTTAGATTTAATCATATGTATCGTTGGAGTTGTATAAAATTATGTACAATCGGAGTGTAAGTGTAGTTGTGTGGTTTTCTTTTGCGCTAATAAAACTTGTCTCTTTTCCCTAATCTCCAATCAAATGATCAAACTTAAAGCAATTCAATGAAAACAACTTTCCTCTCCAACTCTCTCTCGCAGTCTTTGTAGAAGTAGCCAACTGATACACAGAAAAAGATAAGAAAAAAAGTCAAAAAAACATTACTATCC…
ASTF_00004905	XLOC_002592	1609	195	0.5715	-0.428018	0.00387621	1	0	0	CGGGTTTGGTTTTTGGGTCAGGTGTGGTAATTCCGATTTGGTTCCTTGTTTGTGTTCTTAGAGGTTGAACATGTCTGTAACAACTGGAGTACAGATCCTGCTGACGTGTTTGGACAGACGCGAAGGATAAAGCAGATCGGATGTGCAAGTTTGCAATAGACATTGTTGGCTGAATGGCTAGAACATGTTAGCGACGATCTGATGCCATCTGATTGTTCCACTAACTTTTTCGATTTACGGCAGATATTAGTCCTCAATACGCACAGATACTTAATTTTATCAACGCCAGTGTGTTGGGCCTACTAGACGCCATTTTACTCCTCCGGTGAAGATTAAAATGGGACAAAAACCTAGGAAAACACATAGCTTATACCGCAAATACACACTGTACACATACAG…
ASTF_00004909	XLOC_002596	495	387	0.8004	-0.440617	0.155425	1	0	0	AAGAGAACAACAACCAATACTACTTAATTTCAATGGCGTGTATTTCGAAATTGTATATTATTTCCCTCTCCGCACACAAACACACACCCGCGAAGCTCCCGTGTCCCGTTGGCAAAGAGGGGTCGCGGTCGGTGACGCGGGGGACGGGGACGAGGGAACAGTCGTTTTTTTTTTTCGGTCGGTCGTCATCGTCCTGTTCAACGGAATCCGTTACTATGTACCCATCCGAGTTGACCGGATGTCATTTGTGTTCATTTATACAAAAACATTGGTTTCCATTTTTTTGCACAATTTTACAATTAGCAGCGTTTTACTTGCTTTGCTTCTATAACTTTACCACTCTGCTAGGATGCACTGTTCCCCAAATGTGTCCTACACCCATCTGTCAACAGCGCGTGT…
ASTF_00004910	XLOC_002597	871	174	0.716	-0.600398	0.00888551	1	0	0	GCAACACCTTAAGCGGGTTCGATTCTGCTGCTCGATGCTCTAGAAGCCTACCACTGCTATCCCTATAAACCTTTGACCCTTCAACCAGCTGTTCAACTTTTGCTTTTGCCCACGCTTAACGAGCCCCAACAATAACAAGCCGCCGTACTGTACGAATCAAAAGGATGCCAATATGCGCCAATGGGTTCGGAATCCGTTTGTTACCAAGGTTGATGTGTTTAATTTTACGTTCCAATTCGAACGGTACACGTGCGAGTGTTTTTCTTTTTCTGATCAGTGTAAATATAAGTGCGTTCGCACACGTGGATATAAATTTTTCCATTCCCTTTCCATTTTAGCTTAGAGCTCTCGCTCGATAATTGTTCAATCATAGCTGTCACTCTAAATGCATACAGGCTT…
ASTF_00004911	XLOC_002598	451	120	0.7674	-0.284964	0.0235588	1	0	0	TACCGCTTTTCGTACCCAATCAGTATCAAATCTGTCACTATATACAAGCGATGAAGAGTCTCGTCGAATGGAAACGTCAACCTTTTCGTTCTCTCTCCAAACATTGGGCACCACACTCCTCAAACGCAGCATCCGAAAGTCTAGCCCTTTGTGAGTGTCTGTGCTTCTGATGTTCAAAGGTTTTTATATTCACCTAACCCACTCAACAACCCAGACACATCCATCCAGAGCATTAACAACGATTGTTGCAATCTTTTAAATCTGCACGTACAACATCACTCGATCCCCATACATCGGTGGCAGAAAACAATGCTGGCGCGCTGCGCGAGGAGCATGCAAAGGAGATGGGTTCGTTAATTTACTCGCCGTTGCGTAATAATAGAACTACACCACCGTCGT…
ASTF_00004912	XLOC_002599	649	252	0.4404	-0.113638	0.0323986	1	0	0	GCATGAAATTTTATTTGTTCTGCTTTTATGTTACTTACTTTAGGGTTTTTTTGCACTTACAACCTCGCTGTACTAATTGAGCTATTTTTAACTTCTTCTCTGACCTCTTAAAAATGGTTTAAAAAGGCAAATCTTTAACTACCAAGCACCTACATAACCCTGTAGTAAAGAAGCTTATAATGCCCATGTGGCAATTAGCTCCACACTCCACGTTTTCATTGCGAGGGTTTTACGCCAGTTTTTCTCCTAATTCAAATACAGACGCAGTAACACGTGTTACGGGGAGAGCTTAAGGCCCTTTTTTATCGGTGGAACGAACATTCGACAATGCGCTCAGTCCACCAACCACATCACCTCCATCTCGTCCAGTGTGCGCACCGTGGCGAATCGAATAAACCA…
ASTF_00004913	XLOC_002600	530	201	0.4834	-0.288878	0.0184636	1	0	0	CGTTTCTCGCACATCGCGCCCACGTGTCCTCTCTCTTGCGCCACACATTTCGCGTCTGCTTGCGCGTGCTCAAACCGGCGGAACGATCGAACACCCCGCCCGCCCGGGGGCATATTAAATGTGATAAGGCTCTCTTCTTTCTATTTTTCGGCCCCGTTAACAAATGTGTTCGCTACTAGACGTTTTCTTTTGCCTTTGCGCACAATCGGCCACCGGCGTGCGCGCGCGCGCCTGGCCGCCTAAACACCACCAACCAACGGTCAGTTTGAACGCACTCTACCTCCCTACTTCCATTTCCGCTTCATATAAAGATAGCTTAATGTTTCATACGTGTTGTTTTACTACGTCGTCGTACAGTGTGTAACAAGCACTGAAATCGGCGCTATGTGGCCGTCTCTT…
ASTF_00004914	XLOC_002601	428	129	1.0391	-0.138691	0.0790715	1	0	0	TTTCTATCGTTATCTTTGTAGATAAAAGATTTGACTGGTTTGCTTGCTTGTTTTGGTGCAAACAAGTACGATCATGAAGAGCGATCTGGGCTTGGCTGGACTTTGTTGTGGACGCCTGCAAAGGACTGGTTTTCCTGGTAAGTCTGCAGCAAATCACATACGACCCGTAGACAGACAATGCCGGCCAAGCCAAGCAATCTGAAGACTACCGAGAATTCTGAAGAAACGAGCGCTCTCACACCGGTGCTGACCGGTTCTGGAGTTTTGAAGGAAGATCCATAGGCATCCTGCCGGCCAAGAAGTCGTAACATTTTCCCGAGCATAAAAAAGCAACGACTTCATGCACGCTTGCACACACACGCACAGCAAAAAAAAATCGACAACATCACCGGGTGTCGA…
ASTF_00004934	XLOC_002610	449	165	0.8422	0.0745346	0.0954337	2	0	0	GTTGGTTGTGTCTAGAGAAATCCGCCACGGTCGGAGGTGAAAACGTGTCCGTTAAAAAACATAGGCGATGACGACATGATGCCGTAAAAGAATGATCGAGAAGCGAGATTGCAATAGTAGGCTCTGCAAGCTCCTAGCTCAAGTTTAGGTCGCTCCTAAGCAGGTGCACTAACGACAGGTGCATATGCACTCGCTGTAGGTTGGCAGCATTGCTTCAAGATGGCGCCACGTATCATCACAATTTGTCATGCGGCCGTAAAGGATTACGGAAAGGATTTACCCGGCTTATTACATCCGCGAACTGCACCAGAAGCAGCGCGCCCAGTGACGTGTGGTTGCCGTGGTGATAGCGAGAAGAGACAAGACCGAGCCCAGGCCCCATAAAACCCCTAACGCTCA…
ASTF_00004955	XLOC_002622	660	363	0.8675	0.085442	0.335911	2	0	0	GAGCGTACGGGCACCAGTGCAGCCAAGTAATGAACCATAAAATAATGATCCCTGATGAACTACACCTCAGCGAATCAATGATGCCAGGAGGACGATATTCCGCTACGGGAAAGGAAGAAATCATAATAAACTGCGCGCACCAGCGTAGAGAATATCGTTCCGCCGTAGGGAGGCCACCAACCGCCCAGAAGATCACCTACCCCCCACACCCTCTCGACGCCCCGAAGATCACGCCCCGTGACGAATGCGATCATGATAATCAGCGAACCGTGACTGTGCGCGCGCATACAACCAAAAGCTGGACCATCCGAAGGCGAAGATTCTGCCAGAAGATTCCCCGAAAAACGAGGAAAAGTGCTAGTTCCATCGTGGTGATGAGGAAGCAAAACTGATACCGTT…
ASTF_00004956	XLOC_002623	4744	282	0.4871	-0.296815	0.000129232	1	0	0	AAAAAAAAACTTAAAACGGTGAAAATGTTTTTCGAAATCATAAAGACAATGAGAAGATTAAGCACTCAATTCAATATTAGAGAGAGAGAGAGAAAAAGAGAGAGAGTATGAGTTTTTCTTAGTTCAGTTCAACCGATATGAATTCTTTTGTATTTGTAATGATTTTCTTTGTAGATAAAAATATTTTCCTCTTTTTTATCAAAACTATTAATTTCACCAGCCTACATTACACAACACGTAAGGAAGCAATAATTTTAGTAAAAAAACAAAATGGCGTCAGAAAGGAGAGGTGCGCAAATTTTCTAACCACAAACACAGTCGATTTTAACTAGTTACACTGCAGTGAATGGTGAAAAGGTAGCAGATGATAAAATGTAAATAAGAACACCAGACAGACAC…
ASTF_00005014	XLOC_002663	1609	159	1.0742	-0.177177	0.0225265	1	0	0	ACTTTTAATCGTCGCTCGTTACTTTTTACTGTTTCTTCTTCGTTTCTATTCCTGTTTCCTTTTGTCACACCTTTCCGTGGAAAGGTGAAACGAACATGGTAAAATAATATAAACAAGGACAGCTGTGCGTGTGTGTGTGTGTCGACGGGAGGGGATGGAAAACCAAATCGTTCGGCATCGTAAAGCTGAACCAAACTCTCAAAACACTTAAAAAAATACACACACGCACACATGCAAGAGCAAATATTATAGTAATTGAATTTTTTTCCCCCAAAAAAAAAAAACAAAGGAAAGAAGTCGAAAAAGATTGATGTTTGTATGAAATAGATATGGAGAAAATATTAAGTAAAAGCCCTGAAAAATGTGGACGGTGAAAACGCAATAATTGTTATATTAGTA…
ASTF_00005026	XLOC_002670	403	51	0.8377	-0.964767	0.00343959	1	0	0	CAGACTCGCTCGTACCGAGGCTCTACTGCGACCTTCCGTGAGTGATGTGTGTTTTTCTTTTCTGTTTCTGTAACACAACAACCGTGAATTGGTGAACCGTGTGTTAGCAACAAAGATTTAACAAGCATTCCACCGAAATGGAGTTCCTTTACGTCGAAGGTTTGATGGGCGAGAAGTTGTGATGTGTTGTCCTCGCAGGACATACTAAACAAGCCCTGCCCAACCTAAGCTCGTGGGAGTTGTGTGTTGCAAAGCTGGTACGGGAAAGGAAAATCTTTGTTTTCCTTGTGAACCAACACACCAAAAAAAGTGTGTCTGTGTTGATCAGAGGAAAAGTGTATCAGAACTTCGATAGCAGGAAGAAAGTTAAAGGAGAAAAAAAGAAACACCTACAGAGTG…
ASTF_00005064	XLOC_002697	276	159	0.712	-0.0307288	0.0625576	3	0	0	TTTTCTGGGAGTGTTTGTGCTGGTGCATCCTGCTTTTCCAAAGTTAATTTAAGTCTACTTCAACGCACATCTACCAACTGCATCCACCATGATATCCGACGTGCAGTTGGCCGTGTTCTGTAACGTGCTAGGGGGTGTTCCTCTTCCTGCTGGTCGTTGCATTCCATTACATAAACGCCAACATGGGAAGCATGCGAGGCGGCCCAGGATCGAGGCATAAATGAAACATTCCTACCTAATCCTGCACCTTTCCCGTGGTTGGAAAAACGACCGCAA
ASTF_00005067	XLOC_002700	3439	243	0.6137	-0.540997	0.000436454	1	0	0	TTTCTCAACTTGTCTTTTCCACTTCCACGAAGATTCCTGCGTTCTTTTCTTCAAATCGATCATCACAAAGAACGCTTCTATCATATTTTTGGATTCGTTTCAGGCGCCTTTTATTTTTCTCCATTTTTAGGTTCACTTATCGTTTTTTTCTTTTTTGTTTTGTTCGCTTTACGAGTTGAGCTGTTTGACAAATTTCTTGTTTTGCATACTTCGGTTTGTTCTTTCTCTTTCTCTCTCTCTCTCTTTTTTGGTTTAGCATTTTCGTATTTTACGTATTTCGACTGCTGTTCCGGTTTCGCTTTCATTTCCTTTTGTCTCGCTTATCATCCGGCAGACGATTGTTTCCGGTCCCGTTCTACTCTACTCTCTCTCGCTGTTTGCTGTTTGCTTCCGTGTTCG…
ASTF_00005073	XLOC_002701	1080	201	0.8648	0.0335776	0.0566825	3	0	0	GTGCGCGAGTTTTCCGAAACTTTCCGACTGGTACCGAGCGAAGCAACAGTTCCTGTGATTGAGACACCAAATAAACATCCGCTACAAAACTATGATTTTTCAAATGTAACCGATATTGTGGCCGTGGGTTGCTTTGTTTTTTGCTGCTCCTTTCGCAACCAAGAACCGGAACTGTAAAATCCGGTCCAGTGCACGCGCGTCGAAGCGGGTTTGCCAAGGAAAAAGGAAAACAAACTGATCAGAACTGGCTTAGTGTGATTGCCGGTGCAGTGTGCTGTGTTGTGCGGTGTGAAAAATGTGTTCCCATTTTCTTTTTAATGAATCATCTGAATGAATCAATCAGACGCGAAACACGAGCGTAAAGTGCGTGATCAAGTGGAAATGTAGTGTGTTTTTTTC…
ASTF_00005084	XLOC_002710	121	87	1.0163	-0.0778646	0.0881741	2	0	0	GATAGCCGGCAACCAGTCGAGGTAACCAGTTTAGTAGGGAAAGCACTCCAAGACGCATCGCAACGAGGTGAAGCAATGTCCGAAGGCATTAGAAGGGCACGAAGCGTTCAGCTGAAATATC
ASTF_00005086	XLOC_002712	827	147	1.0889	-0.170005	0.0595389	2	0	0	GCATAACTTGCGTGTCATTTCGCAGTCTGCACCGTTCTTACTAACCGGTCTCATATCCTTCGGAAGAATTTGGTGTGCATTTTGGGAAAAGGTGATAGGCAAATAAAGAAGCAGAAGAAGCGCGTACGGAGATGAGTCACGCGAATTCAACAACCATCGGTATCGAGGACGACATATCGTCGCGGAAAACGATCATCCTGTGCTACCATGATGTAACCGGTTCAAAAGAGAAAAATGTCGTTGAGCAGATAGCCAAACATTTGGAAGAGGCGAAATTTCCGGTGGAAAGGACCGCGACCGAAGTTGAAAAAGTGTTGCAGTACCCCAGCAGCACGGTTGTGGTGATCATGTGTTCTCATGCAATCTTCAATCACAATGCATCGTATTTGGAGACGCTGA…
ASTF_00005099	XLOC_002722	1025	135	0.7943	-0.539836	0.00746784	2	0	0	CTGTGTCTGGGGGACAAGTTTAACCAAAACAGTTCCAGCATCATTGATATAGAGTTGCGACCCATCTTGCGGAAAGTATTCAGCTTCCCGATCACCAACAAAATAGGATTGCCGATGAACGTTTGCGGTAAATGCAATCGAAAGGTGCGACTCTTCAACCAGTACCACGCAATCGTGGCATATAATCAGTCGATACTGGAAGCAGCTCTGTTCTCAGCAGCGGTTCAGCAAAAGCAAAACAACTATAGCACCAGCCCAGTACCGGCGATCCCGGAGAGCAGTAATTGCACCAGCCCAGCACTGGTGACTGCTCAACCTCCCGTCACCAATGTGAAAGAAGGTATAGCGGAAGTGATAGACATTGCGAGCGACGATGAAGCCTCGAAGGAGAAGGAAGAT…
ASTF_00005149	XLOC_002744	1176	141	0.8811	-0.420427	0.0110065	2	0	0	TTGGTGGTGTACGGTTTGGGCATAAGCAACCCCATCTCTAGTGGAAATATATTCCAATCGCAGTAATCCAATTGGTACGCGGTGCTGTACTGAAAGTTAGCATAGCAAGACACGAGAGAGAGAGCAAAGCACGGCGTCGAGATCTTCGGTTCGAAACAAATAGCAAGTGACGAAGCATTCTATTGACAAGCGGCGTGGAAGAGGAGCAAATCCATCCAACTAAACGGTGTGAAAAATTCGGCCAATTGCCATCATCGGCGCTCTGTACGCGCTGGGTGGAGACGAGTGACGTTATTTTAGTTGCTGTATTATCTGTTGTGTTTCTTTCCTTTTTCGGGAAAATTCCGGAAGGAGGTGTGGTGCATACGTGTGTGTGTGTGTCTGTCCCATAAAATCTTT…
ASTF_00005229	XLOC_002782	546	135	0.953	-0.0584569	0.0673086	1	0	0	ACACACACACACACATATATACATACATATACATGTACAACTATATATGCGCCGCGTAGTAGTTTTGATCGAATCCCACGGTTTATCATCATCGGCTTTGGGGAAGGGAAAAAAGGTGTGGCGGAGAAGAAAGGGAGCGGGAGCTGCAAAAGGATCGGCTAGCATAAGCATGGTGTTGTAGGTAGGGAAAATATAATATAGCATAAATGAGACACACACACACACACACACACAACCACGCTACACATGTCTCACAGGATCATTAGCAGCATCGTTGTGTGAGGGATTATTGTTTGAAACGAAAATCTTCGCTTCCGTTATCATTGCTGGCGGCCCCAGAGCTTACTGAACACTGAGAATGCATAACAGAGAGTATAGAGAGAGAGAGAGAGAGAGATA…
ASTF_00005230	XLOC_002783	3071	291	0.7312	-0.553336	0.00151172	1	0	0	ACGCATTTATTTCTCCGATTTTTACATCACACATAAAATTACATACACATTAAGTTAAATATATGTTTGGTTTACCTTTGTGTTTGTTCCGTTTTGTCCATTTTGGGTTCCATTTCTCGACCCTCCCATTTTCCACCCTTCCTGTCGCGTCCTCCTCCTTCTGCCACCAGGCCCATACCTTGCTGTGGGTTTTTCTTTTGCTTTAATGGATGTAATGGTATTACCCTCTTCTTTCCTTTCATTTTTTTACTCTATACCAGGTTACCGACCCTTTATAATGTGATGTACGCGTTTGTTGTGTATGCCACCAGAGAGAGTGTGAGAGAGAGAGAGTTTGTGATTTTTAGTTTTCCTTTTTTTGGATGTTAAAGGTGTGTGTGTGTGATGCCGGAAAAGTTG…
ASTF_00005231	XLOC_002784	381	90	0.6025	-0.160828	0.0163926	1	0	0	GTGAGTTTGTGCCATATGATAAAGCGTTCAAAAATCAGTAAACGAAGCTGCAAAACAGCAAGAATTTAGCACCAAGCTAAGGGGGAAAACAAGGAAAAAGGAAACCTCCGGTTGAGAAGTGCGAGAAAAGTTTTTCCACGCCGGTGTGAAAATCAAGAAGCACACCGATTTTCTTCCTTCGAAGTGTTTGTGCGCAGCGGGTTGTGTTGTGTTTTCCGTTTTGTTCGATGAGTGTGTGTGTGTGCTTTCCGTGTGTCTATACGATGTGTGAAGTCATCGAGGCGCAACGTGCAGATGTAAACAAAGCGGCCAATTGAGCAGTCACGAGTGCCATTTTTCCCCATCCCCAGAACCGGAAAAGGCAGGAAAAGCGCTGGCTGT
ASTF_00005232	XLOC_002785	810	90	1.0251	-0.124781	0.0347392	1	0	0	TTCAACAATTCATACAGCTTTCCTTTAATTTAAACTCTTTGCAAATTATCACAAACAATTATTAATTTTGTTAATCAATCGAAAAAAGTTTGTTCACCGTGCAAAGAAAATCAAAACAAAGGCTATACAAAAAAGAAAACACACAAACAAGCAGAGCACACACTGGCGTTACTAAGTGCAGTACGGGCAGACTACTAGATCGGAACGTGATGGAGGGATGGGGAATATCGATAGAGTATTAGTGGAGTGTAGCAGTAGTATTCGCAGCAGCAGTAGCTTGACAACCGCCAGCGAGTACAGAGTATAGGCAGAGAGTGTAGAGTTTAGATAAGATTGAATATTATATATACATACATATATATATACATATAAATGGATATATATATTTTTTAAAAACAT…
ASTF_00005233	XLOC_002786	1046	195	0.6367	-0.55935	0.00735558	1	0	0	CTGTTTTGTGTACATTTGGAAAACTTATACAGCAGGTACGAGAGATAAACACACAACATGTAAAGAAAAGATGAAAAGAGATAAAGAAAAGAGAGTGAGAAAATAAGAACAGAAATAGGGGGGAAAAAGACCAGTGGAAAGTTTAAGAAAAACAGAAAACAAGAAAAGGAGAGAAAAGAAAAGGTAAGAAAAGTTGAAAATCTGAATAATATAATTAACATTTAACTCATACTTTGCGCTTCTTCGAAACAAAAAAGCAAAATATGCAACACAAAAACACCCCCAATTCGTTTAAAACTTATCATAGTTAAGGGGATATGGGCAACCAAATGTTGGAGAGGAAAACCTACACAAATTCATATCAGTTTTACTCGTGGAAAAGTGTTTCAATTGTTTCGG…
ASTF_00005234	XLOC_002787	1273	231	0.9405	-0.573946	0.0176511	1	0	0	CTGCTAAAGGCGCACCAACTAATGCTGAATGGAGATTTGTGTCCTCTCGTTGGCAACCGTCTAATGTAAAGAAAGTTATTTAAAAAGCTCACAAACACACCCCCATGAAAACGAGAGAAAATGCTAGAAAAAAAAGCCATGAACGCTAAACAGCATGTAAATAGTAAAACAAAACAAAAGAAAAACACGTAACAGAAACGTACGAAGCATTGTTTATATGATAGTAAAACTGAGGCAAAACAAAAGGAAACACAACCACTAACGTACGATTGCGACGGTGTGTAGCTAAAGCAAATAAGTAACCGTAAGTAAATAAGTGATATTTTGAAGTAGTTTGCAAAATCTGATATAAAAAACGTAAACAAAAGTGAACAAAAAAAATCAACACAAAAACGAAAA…
ASTF_00005235	XLOC_002788	1215	213	0.8067	-0.155962	0.0290137	1	0	0	CGCATACAGTTTTGCAAGGTCACACCGGTTAAGGTTCCGCTTGTTGACACATTTGAGTGTAATAATTAAAAGTGTATAGTAACATTTAAAAAGCTTTGTGGCGCACGCATACAGTTCGGATGGTTGTGTAAGCAGATGCTTTGATGGTTAAGTGAGGCGAAAAGATACGTATCACAAGAGCCACGCGCCTGTTCGGTTCGTTATTATGTCCAGTTGCCATGTGTTTTTTGAATACTTCGAATGCTATATTGCCATTTAATGGAAAGAGAAAATGGGAAAATGTGTTTAAAGAAAAGAGATAAAGGGGAAACACATACCGACAACACAAACAGGAAAAAAACACTCAATACAAGCTCATTAGAAAAGATCATTGAAAAGCAGAGTGAAAAACATCACAAA…
ASTF_00005236	XLOC_002789	1216	180	0.8987	-0.334285	0.0188767	1	0	0	GGAGGTAGGGGAAGGGGAGGGAGGTAGGCGCGGGAAGGTGTACACCACGGGCCATTAGAAGCCATTTGTTTTTGTTTTTCATTTGGAATGTGTAAAAAGGTACTGCAAGGGCAGAGGAAAACCAGAGTGAAACGGTGGAAATGTGAGCTAAACATTGGCAGGAAATGGAAATATTACATTTAAAGTAGGTGGACAATTTTTTGAGGAATGTTACCTTTACCAACACACATCATCATCATCATCAAAGCAAGCTTTGGTGTGGTGTGTGTGTGTGCGTGTGTCGAAAAACATGGCGGAATAAATCAGCCAGGACAAAAGACCCGGCATCCAAGTGTGCTGGGTGGTGAAGCTTGTTTAGTGAGAAATGGTAACCATGGGTGTGTTTGAGTGCGTTGTTTG…
ASTF_00005237	XLOC_002790	617	108	0.6639	-0.207211	0.0150673	1	0	0	CCACATCGTACGTCCTCACATACACTCGGGTCATAGTGACGGAACGGAGTTGTTCGAGTAAACACGGTCACGGAACCGGTCACCATTAGGCTTACACATCCGCCATCTTCCCACGGTTTGTCTCGACGGTTTGAGGCGAACCGCGCCGGTAGTGAGTAGAAATCCATTTCCGGTCATTAGCGCAACTGGCCGCACGGTGGTGCTGAACTTTCTCGCTACGGCCACGGATGGGATGCTTTTTAATGGTTATGACTTATCGTCGTTCTGTGTACCGAAGCGTCGCGCGCACAGCGGGAAAGACGTCGCACTGACGTGTCGCACTGTTCGTAACGAGTGTTAACGTTTCAGTCGGTGCCATTAAGAGCGTAAGAGCCTTACTCTGCTGAGGGATGGGTTTTT…
ASTF_00005239	XLOC_002792	621	75	0.5189	-0.0674319	0.0101517	1	0	0	AAACGAAGAAGTAAACGAACCAAAAAAAAAACGCAGCGTATTGTGCAAAATCTACCCCAGCCTCCCCCAGGAGACTCTAGGGGATGGTGAACAAGAAGGGGGGAAAAGCGAGAGGGAGAGTGAAATACAAACATTTGCGGGAAGTTGGCGAATGAGTTTCTCAGGTTAGCATTGCAATTTTCCACCCAAAGAAGAGAAAAACACGTTGAGAAGAAAATAATCGAAAAAAAGCACATAGACACACACATCAGCCACTGCAGCAGACATCAAGGAATGCGTGTGTGTGTGTGAGATTCGCGAAAATTGGGCAGAAGAAAAACAGTGCGTCCGCCCGCCCGGTGGTAAAAATAGTGGCCACAACCAGCGGGAGTGAATTATGGTGAGGTGAATTTTTCAAAC…
ASTF_00005240	XLOC_002793	1396	237	0.6128	-0.603962	0.00557919	1	0	0	TGATAATTCATGTACGATTTTGTGTTTTATATTCCTTTTGCTGACAGAGTTGAAGAATTGTATTTACGTATTTGATTTTTTAACTGTGACCCTTATGCACTTATGCGTAAGGGGATGAAATGTTAAAGTAGTGGCAAACGATGAATTCTACCTTCCATCCCCTTTTTATGGCCTTACACATCCCACCTACAACATATATTGCCTGCTTTAAACCGTTTAGTGGAACTGTTTTCTTGCTGTTTCGTTTTACTGTCATTACATTATGTCGCTTAAAACGTCTTCTAACGTATCTGCTAGCTGTGTGTGTCCTTAAGGGGGGGTTTTAGGAATAGTTTCTTCTTCTGCAACTTATCAGCACAACTACATGGCTACGATATCTGGGGCTTTAGTTTGTTGTTT…
ASTF_00005241	XLOC_002794	247	234	0.7241	-0.0148371	0.126649	1	0	0	ATAATCGTAATCGATGTTAGCACGCTCGCACACACATCAACCGTCCGCCATCGGATCCATCAAAAGCCACGATTTAGGTCCCGGGGAGCGGCCTCGAAAAACGATTGCTCTCCCCGGCGAGCTTTTCCCATTTAGATATTTTCCAATTAGTGAAACCGCACTTTTCCACAGCGGTAACACCGTAAGCCTATTTGATGTGCTGAAGGATTTATCAAAAACCGATGATGCTACACCGCAAGCCACCGGC
ASTF_00005243	XLOC_002796	693	177	0.662	-0.703236	0.00774819	1	0	0	ACTACTACCACAAATTCCAAAAAAGTGCAGCTAGCTAACACAACCATTATGAAAGAGAGAAGGAGAGAGAGAAAGAAAAAAGCTAACACACACACACAACTAAAAAAACTATTCATGCGAATCAAATAGAGAGAAAAGAAAATGATAGATTTTATGTATTTCTTCATATACAGAGAGAGACAAAAGCATATCTTTTTAATAACAAAAACAAAACGTTTAAAAATTTAACGAAAACCACATATATGTATAAAAGAAAGTGAAGATATATAAAGAGAGAAAGCGAAAAATACAAAACAATATTCCCAAATGAAGCAAACAATTAAAATGGCAAAATGGATGGAGTTGCACATGCGCGTGTTGCACCGAATGGTTCCTCATTTAACCATTGGGTTTGCGTAC…
ASTF_00005245	XLOC_002798	439	174	0.9058	-0.289063	0.0559052	1	0	0	CAAAAGTGCTCGATACGAACGGCCGAGAAGGTGCATCGAAAGTAATCGAGATTCCTTTCCATCCTTCGGTTCGTGTTCGGTTCGTTCTGTGTCCCGCGGGTTTCTCGCCTACCGAAAAGCGTTGAAGTTTTTTGTTTTCCTTTTTTTCGTGTACAATTGCTTTTGGTCCTTCTCGGGGAAGGAGAAACGTTTGGAGAATGATGAACAGGGAGGTAGTCGGTGCGATGGTTGAGAGATGCGGTGTAATAAATTGTAGCTGTGTGAAAACAAATCCTTGGACAGGTATTTTTCGGGCAAGGAAGGATGAACGATCGAGCATTACGATGCGAAGGTGTGAAAAGGAAAGTTTGAAGGAATGTAACGGTACGTGATGTGGGAATAGATGTGTAAAAATTCAAA…
ASTF_00005254	XLOC_002802	872	303	0.6118	-0.135473	0.0580881	1	0	0	ATAAAAAGCAAGGGAAAAGAAAGGGAACCAGGGAAGCATTGATGGCCATCGATAAAGCAACCGAATGGAAGCTGTACGCGAACGCGGATCGAAAGGTAATTAACACAATTAAGGGCACCGTTGCGTTTCACGTGAACCCGCTCTGCACTGCTAGACCTGGTCGTTCTAATGTATGTTGCCTTGGAGCTTCTCGGCGGATTGAAAATGCTGAATAAACAACCATTTTCGCATCCTTCCGTAGCGAATGTGTTACATAAATGATACGGCTCTAACCACCGCAACAAGATCGACCGGTTCCCGCAAGATTGAAAGAGCTCCCGTAGGAAACTGGGAAACCCGTCGAGATTCCTTCACACACAGCCAGTCGCAGTCGCGTTGGCGAATAATTGTGCTTTGTTT…
ASTF_00005262	XLOC_002807	296	96	0.7232	-0.100956	0.0315562	2	0	0	GTCAGTAGGGCGCTCGGCGTTGGAGTGTGCACGAGTAGACGACACGGCAAGCTCGCAAGAAGCCTGCAAAGAAGCCTTCTGGCAGCGCGCGCTCCGGATGCTAGTTCTTCACCGCTGTGCTAGGGCCAACGTTTGCTATTTTTCGGCCAATGAATGGCGACAATACCACCAGGAGCTCGTATAACTCAGTGAACTTCAAGATATCTGGAAGAAAAATTGCCCATTTCTCTCGGTCGGTTTACTGAGGATCCCGGGTGGGAGGCCTTGCTTTGGGGCAGGAAGTTTCAGCATACCCC
ASTF_00005291	XLOC_002822	1474	90	0.7328	-0.221282	0.00485219	2	0	0	GCGGAGTGTGCCGACACCGAACAGTACAGTGCCGAAGTGACTAGACGTGCTGGAGTCGACCGCACACACAGAAGACACAGACTTCTCAGAGGGAGAAAAACCCTTCTTGCGTCGTGCTGATCGTGCCGCTGCGTGGTTGCGTGTCGCCGTATCGAAACTTTAAGCTTGCCGGTGGTTTTGCCTGTGCCAAACAGCATCTCTCCCCGGCTGTTGTTGCGCAAGACGCGCTGTTGCTTGCTCGTTAACGCCCGCGGAACCATCAACGGAGACAGATGCAGAAGGAACTACCACCGTCAGTGGGAAGGTCGTGTAGCTGAGGAGTTCGTGCTGGTGCAGTTTTGAAGTTCATTTTATCAACGGGCGAATGGAAAGGCACCGGCAAGAAGCATCTAAGCAGGC…
ASTF_00005314	XLOC_002833	747	75	0.9147	-0.153311	0.0225374	2	0	0	CGCGTTGGTCACGGTGTCCGCTAGAAAAAGTGTCGTGTCGTGTAAAAACGGAGGATACCATCAAAAAACTGTGCAAAACCGTGAGAAAATCGCACCGAACCGGGTTCGACAGTTTGCTGCGTGGTTGAGGTGTTATTCCGTGGCGGAAATGATGTGGTGGCAGCCGTGGTAGAAAAGTACCCCCGAAAATTCCTTGTGGCGACGGCGACTTTCGACGTTTCGGCAATAGGGCACGGTCATGCAAATAAACACGGTGGAACGGACAACCCGAGCAAGTAACCACTAGAGCATCCCTTCCGTTTGGCGTAATCTCATCGTTTTCATCATCATCATCATCACCATCATCACCGCCGTGTCATCATCCGAAGACCACGAGGGGTCGAGAGTTGTACGAGATCC…
ASTF_00005316	XLOC_002835	982	255	0.7272	-0.064205	0.0549355	1	0	0	AGTAATTATTTAAAGTTGAACTCTCTATACCCTTGTTGAAGCATCCGTTGTTTTCCATTTTAGGCCACTTGAGAACCAATTTTTGATCTGAAGGATATGTTGGGCCTGGCTGGTAGGAAGGTGTGAAGATAATAGTTATCCAGCCCTAGGTTAATAATATCTTCGTCAATGTTCAAGGTGTCCGGTTTTCCGTTTGAGGCACTGTATGAAGACATTGGATCGCAGCAGGCGTTACGAGCAGGGCGCACCAACATGGTTGCTGCGCTAACAAGGGAGGCGCAGAAAATACAATTTGCAGCACACAAATAGAGATCAGAATGTACGAGAACTTTTCCAACAGTTTGAACACCGACTTGTCGCAGGTACTTTATTGTTTTTTCACCGGGGACATGGGGAATT…
ASTF_00005469	XLOC_002924	2655	240	0.4506	-0.557913	0.000722361	2	0	0	CTTATATCCTCCCCGCTCCACCGTAGCCCATCCATCAGAACTGCCACCATCGCCGCACCAATGGGAATGACATAATGAAGCAATGGCCGCATAAAGCAATGGAACGCTGTGAGAATGCAACCAAATCAACGAATCGGCTCCTGTAGAAGAAATTAATGTGTGTGGGTGTGCGTGCGGAAAATTGATCCCCCACGCTAGGCCATCATATCTCTCGGTTTGATCGGTGTATCCCTGTGCTTGCGTAGCGATGGTTGCTAGAACGAACCAAACCAACTAAACTATATGATCACGCCACAAAGAAAGGGGACAGTATTTTTATTAGAATGCAAGTACTGACGTACAGGAAGAAACTAATCGAAAATGGAAAGCAACATCTGGGAACAAGATAGATATTAGAGT…
ASTF_00005478	XLOC_002927	1827	180	0.6748	-0.647231	0.00205373	1	0	0	TGCTACTGTATTTTTGGATGATTGAATTGAATAGGTAGATAGACAGACAAGCCACACATAAAAGGGATAGAATAAATACGATCCGAAAAGCTATGTCCAGTCTACGCCAAAAAGGATGGTATTTAAAAAAAACCAACACAAAAGAAGAGGTCCCTAAGTATCATAAGCTTCTTGTACACCCCCTCTCTTTCACATGTGTGTTCAGTAGTGGGACTTGGTTTTGCGATTTGTTGCTGTTATTCTATAGTTCAGTGTTGTGGTTTGCTGCTGCCCTTTTGCATGGGAAATATGGTCTGGATTGCGGGGGTTCAGTCTTTTAAAAGTTTTGTTAACTACTCTCGTCTGTATGATTGCAGATTGTAAAGTTTGAAGATCCGTTCCATGTGGTTTGAAGCAATT…
ASTF_00005508	XLOC_002946	1290	141	0.494	-0.449674	0.00279013	3	0	0	AAGCAAGCGTAAAGGAATTCAATCACCACCATCGTATCCAGAATCGGGATCGGACCAATCAACCGAAAGCCTTCGCTAGCCGAAAACACGGAAAGGAAACAACACACACACAGGACGTCAACGTACACCGGCGATTTGTTTCATCGGGGAAAATAAATTTCTCCGCATTGCACGAGCATAATTATGTTTTGGCGGAATGTGACGGTAGGGTTAGTAGCCCGGTTGGGGACGGATGGGCAATAAAATGTTTCACATTATGACACGCGCCCGTACCCCCACGAAGGTTGTGTGCGTTTGACTAATGAAACATAAATTTTGGCCCACCCAGCCCCACCCTCCCCCGTAAAAACGACCCCTATTTGCCGAATGGCAGTACTGCTGTTAACAATTTTCATTACG…
ASTF_00005539	XLOC_002958	502	303	0.6068	-0.00112137	0.120965	2	0	0	TTCTTCAACAGACCTTGGTCAGATGTGTTTGTTTTCGCTGGTGGCAACGACGAGGAGAGCTTCCGATTGCGCGAGAGCGAGATTTTCCGTGTGAAGTTTTCCACACCGCACCGAACGGGAAAGGGGTTGCACAGGTTCCATTTTTCGCGTGTGCGGCCAAATACGTTCCGAGTGTTCCCGTGTGCGGTTGCCAGCGCGTTGTTGGTGTGCAGTGTAAACACAAAAGTGGTGCGGACTGTGCAATCGGAAAAAAGAGAATCGTAATTCCCTTCCGTTTTCCAGCGCTTACTACTACAGTGTAGCATAGGAAGGAAAAAAGTGAATTGTGTGTTTGTGTATGTGTGTGTACACCCTATGTGTGTTGGTGTTGAAAACGAAATGTAATATTGAAGAGTGTGT…
ASTF_00005540	XLOC_002959	1476	204	0.7351	-0.360593	0.00955542	1	0	0	TTTTGTTCCAACAGATGCTGGCTTTCTTTGGAAATTTTTCTAAAGCATCGCATCGAATTTTTGCGATCCTTTTTGGGATTACGGCGGTCCTTGGACATCTACTTCCTAGCTTTCTACCCCCGATACGATGTGCATTATTCGTTGAGCTTTGTTTTGTCCTTTTGCCTTAATTCGCCTCATCTTCTTAGTTCGGTTTGCATCACACCTCCAGGAAAGACGATGCTAATGTGTAATTTAATGTAAAAAAGAGAGGAAAACTATTACAAGCTTTACTTCAAGATACGCTGCTCCTGCTTATCGATCGTGTCTTTAGGCTGTTTAGTAGATCGTTTTATGTTTTATGCATTTCCCGTCTTATTTTACCGATAACTTCGCCAGAACGGTTATTTAAGGGTTCAG…
ASTF_00005549	XLOC_002962	436	90	1.1204	0.596325	0.304185	1	0	0	CCGTCATCGTCGTTGGCGTGGTTGCTGTGGTTTGCGACACCGCGGCTCATCGGTATGGGCGACACCTGTGCCGTCTCCCGGCCGTCATCGATCGGTGCCGGCGGTGAGAATGGTGATCGTGCCCGGTTCCTTGGCTCCGGTTGCTAGATTGAAGCAGCCGGTGTGCAGAAGCATGCGGAGGAGTGATGGTGATGGTGGTCGCACTAGCAGCAGCAGCGTGGTCGAGGTTGAGCGAAAGGGTGGTAGTCACCGAAACACGAACACAAAACAGCAACAGCACCGTCTGCGACGATGGTTACGCACCACCGTGCGTCACAGGAAAACGATCAGCCAGCAGCAAGTATCAGCGAACCAGAGGCAGCTTGATTTATACGCATTCGTTATCATCCCTTTGCGTAC…
ASTF_00005581	XLOC_002980	781	207	0.6672	0.170193	0.0676937	1	0	0	ACTATCGCTATTGTGGACCATGGGTTTTGAGCGAGCACGAGCAGCTCAAGCATGACGACCTCGGCTTTCAAACCGCTCTGAATACGCATCGTTAATACCGCTTTGCAATCATCATCATAAGCACCGTCGTCCATTTCCAGCGTTCGCACCCGGACAGCAGAAGAAGGCGGCCAGAAAGGACATAAATTTTACAAGAGGAGGAACAGAAATACATAAATACAGCCACACGGCCACAATAAAATGCGGGATGATGTAATCTCGGCTCAAGTTTGCAACATTCAAACTCCCCGCACAGGTCCAGAGCCTGGGAGAGTGAGAGAGCCTGCGTGCGTTGAAACCCGGCTGCTGTCGCCTGTTGTCGCCTTCCCGCTAGGTAGGTCATCCTCCTGCGGCCTCCCA…
ASTF_00005586	XLOC_002985	834	114	0.9968	-0.000369826	0.0504602	1	0	0	AACCGGGATGGCGCGCGCGCAACCTACCTATCTCACGACGTTCGTTGGCAGCTCATCTCATTCCGCCGCTATCAACATCACGAGCAGGTTGTCGGTTGCGTGCGCTTCGACGAGTGCGTAGGTCTCTTGGACGACGAGTTCCGTGTGTCCGGAAGAGTGTGTGTGTGTGTGTTTGTGTGTCGGTCACCATGTGCTTCCTCTGCGCGTAGTACATTGGAACGAATTCGCGTGTGTTACGAAACGGCTTCCGAGTGCTTATCCGGCAGCTTAACGTGGTAAAGATTGTGTGAAGTGTTCCAGAGATCTCGGTAGTACCTGCCGGATTGATAACGAATTTAGAAAATGCGAGTGTTGCCTCCACGAAGCTAACCTAGATTGATTTTTGGTTGTTCCTGGTAG…
ASTF_00005590	XLOC_002989	515	174	0.459	-0.610698	0.00651777	1	0	0	ATTCTTGTATTACGCTCTTTGTTTCTGTATTACGTGAAGGTGCAATGTATTTTTTTTTCTTTCTCTCTTCTCACTTCTTCATTTCTCGCTATTCGATACCGTTTGCCATTCCATTTGCCACAAAAAAAACCCACACTCATACCCTTTGTCGGCACACTGTCACACACATACACACACACACACGCTACACATCCGCGGCCGTAGTATTACGAATGTGATTGTAATTTCGCACCCAACTCCTCGCCTTACTACAAGCCACAAAACGCACCGTGCCTACACTACGACGATCAGCTACCACACTACACAGAACTGAACCACCAACTGAGCCGATCGAACCACATTACTACCAATTTCCAGTGTCCGCAGGAATGCCACACCGAGTGTATTCCGCTGCGATCG…
ASTF_00005591	XLOC_002990	191	54	1.1012	-0.201492	0.0594542	1	0	0	GGAAACCTCCCGTCTTTGGGCGGACAAAACATGCTGAGCGAGCAGTGCTTACTGGTTCGTGAACATACTCTAGAAGACGTATAAACCATCATCGAACTGCTGCTAGCGTGCTGCTGCTGCTCCTGCTTCAACGGATACGAGAACAATTCCTTACCAAACAGTAGCGAACGGAAGTGGATAACTGGATCGGA
ASTF_00005592	XLOC_002991	520	117	1.0327	0.0804126	0.101037	1	0	0	TTAGTTTAGAATTATCGACACATCTTCACAATCGCGAGCGTCTCATCGAACAGTTTCTTAGTGTAGCAACTCGTCGAACAAGCAGCTAGAGGTATCTAAACGGGTACCTCACATGACGACGACGACGACGACGGCTGCCCGTGAGTTCGTGGCTGTGGCAAAAAATAGCACACATACAAATGAAACAAAAACAGAAAAGCAAATACTGCCCTCCATCCGCGATTTCTAGTAGTGTTTGAGCGTATCTTAACGTTTAGTCGCGTAGCGCGTAAGTTAGTAGCGGCGTAACGTCAGTAGCCAGGGCCGCCAAACCGTCGCCACCGGACAGCCACTCAGCGACCGATTGGCGATTGGAAGCTTATCCTTTGTAAGTGTGGTAGCGTTACATTTTAGCTGTGG…
ASTF_00005593	XLOC_002992	1258	84	0.4827	-0.2288	0.00286998	1	0	0	TACATACAGACACACACAAACGATAACGTTACCTAACACTGTAACCAATGCACTGAATGTTTGAGGGTTCTCTTTTTACTGATTTCCGACACCTTAACAAGGCTTTTTAATAGGTAAGGTTTAGTAAGCAGCCGCCGAGCGGCTGGTTGAGTGTGACACGAAGCGCGGCACAGCGGATACAGTGACAGTTACAAACTTAGTACAATTAAGGGTGCTTACTTTTAAAAAAAAAAGCTACAACTGCTAGAACTACTCGAGCTCCAGAGTCCAAGGCCAGGTCCAGCGCACACGTACACTCAACCCCTAAACTCACACAGCTTCCCGCCGCAATGCCATGCAACAGGATGTCCAAGGCACAGTCCCTTCCACTTGGAGGTGTTCCATTTAAAAGAAAACACT…
ASTF_00005594	XLOC_002993	948	141	0.7155	-0.983424	0.0024275	1	0	0	TTTCCCGGTCCTCCTAACCTAACCTTAAGCTAGGAATCTAGGCTTTGCTGTTGTACAACGCAACTTTTAGGGAGACACCATTTTTGTGCTTGATCATCGTTGGACCCAGGGCCAACAGTCGCGGCCCTACGTTATACCTAATCAATGTTCTTCGGCTAAGTGAGAGAGAGAGAGAGAGAGAGAGAGACGAAAAAACAAACACACAAAACTCGGAATACTAATATGATAAATTACGAAACACGTCGTATCTAACTAACGCTCTACGAGAAGCGTGCTGCAATATGCTGCTTGCCTACAACACATTATGCATTAACAGTCCAGTAATTCATAATACACGAGCGAGAAAACAAAGCCCAAAAACAAAGAAAGAAAACACTACTAACTAAGTCAAAAGCACAT…
ASTF_00005595	XLOC_002994	493	138	0.9242	0.0588708	0.0879396	1	0	0	ACATATATACATAGGCGAAATCGTAATGTGTAAGATCGTGTACAATGCTAAGGTCTCTGTATCGTTACGGCTAGAAGTTAGGATCATGCGCACGAAATCATCCCCCCCATCCCCTAAAATCGCTAGCTAGTAAACTAGAATGGCCACCATTTACCCACTCATAAACCTCCACTCCCACCCCCCCTGGTCACTTTTTAATAGCCCCCAGTCACCCGTGGAAAATCAGTCGGCTCAGGCTCAGTTCTCCGTAACGAACCTTCCCATACGCTGTTACTAGTGTAATGCAACTACAATTACTACCACTACTTCTACTACTACTTCTACTACTACTCCTTCTACTAGTAATGACAAGGTTCTTCAAAATCTTTCTTACCAGTGTACAGCTACAATAGCCAGACA…
ASTF_00005598	XLOC_002997	998	174	0.6703	-0.116837	0.0202787	1	0	0	GGAACAGGCTCTATATCCCAATCGAGAAAATGATGCACCCGTCCCAACGATCCTTCTCCCGTTCATCATCCTGGCTCTTCCTTTTTCACGTCCTATCTCCACCGATCACTCGCGCTTGGGATGTACCCGTTTGGCTGGGGTGTGTTAAGCATTGCGTGTGCAGCGAGAGTGGCACGGCAAGTGCCTGAAAGCATTACGCATCCTCCGTATGCGTACTGGTTTCAGCAGAAAAAGCAGCAATACCCCACAGAAACTTTCCAGCCGACAGGTCTAGTAAAGTTTTGTGGTTTGTGATGTGAACAGCAGGAAAGAGACTCAGTCCAAAAAAAACAGTCGACACTCACCAGCAGACCAGACAGACGGAAGAATCAGTCTATACAAGTAGCTAATGTTGATGTG…
ASTF_00005599	XLOC_002998	3183	378	0.8799	-0.0923981	0.0128817	1	0	0	GGGCTCTGATGTCCAGTCGGTACGTGGTCTGCCTTGCGATCCGTCTCGTAACATCCCTGCATCCGGTGAGCATAGCCGCCGACCCACCTTTCATCGGTTGATCATACTATCTAAGGGGCTCATTTTCAACCGATGAAGATTGGGCCACAAAGAGTGGTGCGATCAGTTTCCGACAGCGGATAACTACACGAACGAGCGTAAGCAATCCAGTGAATAAATCGAACGGCTCCGTTCGTTTATCCCACTCGATTGCTGCCCACACGCAACTGGCAAAGGGGTAGGCCATACACGGTTGAAGGGCTCGGCTACTGTATGGCCTCGACGACGTTTGGATGCTGCACCGGACGCAGGGGATGTTGTACGCGAGTATCGCCAACCTGTCACTAGAGCGCGCGCGCA…
ASTF_00005600	XLOC_002999	942	123	1.0912	-0.556854	0.017358	1	0	0	TTGAAATTAGTTTTATAAATTCACTCACACACACAAATCTTTGTATTAGAAACGATACCAGCATCCAGTACCAGTGCAGTAACATCGCCTAGACCAATATGTAACGAGCACAAGACATCCACAATGCACAAACTCCGAATTAAAGAAAGCTTGCTTAACACACAAAAACGATGAAAAAACAACAACACACAAACTCGTATGCGAACAACAAATAGCTACAGCGATCGAGTTGCGATCAAACTTCAAGCCGAAGAAAGGAGCAAAAAGGGCGAAGAAAGAAGAAAACAACCACTACTACTACTACAAACACTACATATATGAGAATGCAAAAACTAAACAAGCAAGCAAGCAAGCAAGCAAACAAACAAAAATGGAGATGAAATATAAAGTAAAACATAG…
ASTF_00005601	XLOC_003000	946	441	0.7304	-0.330515	0.145208	1	0	0	GACTGTGTTTACGTGTGAGTATGTGAGTGATTACTAGTGTGCCCCGTGTATTATGCGTATTCCTGCATCCATCTCGGCTTTTTTTCCAAATATGATTTTTTTCCACTGGGTTTTTTCGCTTTTAATGCCACAGCTTCATCAGCTTCCCAGCTATATCACTATGTCTCACTATACAAATATATACACTGATACGGATTTTATTTTTCCAAAACCGGATGCGAATACAAATGTGTGTGTGCGTCTCTGTGTTTTGTTTCAAATTTGCTTGAGTTTTTCGTTGGCCTGTCATGACTGTTAGCCGAGGTGCGTTCGTGTCGTCCTTTTATTCTCTCCATTTTCCCGAGTTCGTTATGTTTGCTTATGAATACTCGTGTTTTCCAAATGCTTCACACCAAAACC…
ASTF_00005603	XLOC_003002	1531	336	0.5992	-0.09175	0.0349598	1	0	0	GTCTGCCGTTGCGCGTACGCCGTCAAATCTTTATTCATTTCGTGCTTCATCTTTGGCGCCGTGTGACACACACAGTCTGGTGTCGCGTCTCCGGATCACACCGCAGCTCAGTCATCGGCGACTGTGTAGCGCAATCGGAAGGCAATCCAAACCAAACGGGTCGCGTCGGAGTGCGTGCGTGCGTTCGTGTTTGCGATCGTGAATGAATGAAGCGAGCATCAATCGGGCAGTTGTTTTCGAAACGCGAGCGAAGAAATTATCAAAAAGTGCAAAGTGCCGAACAACTGCGTGCATGTGTGTGAGTCTGTGGGGAACTTGTGCGTCGTGGCAAGTGTCCGGGGCAGTGAGCAGTGAGCAGTTATTGAAGGAGTCCCGTCCCGTAACACCGTCAGAAAGCCC…
ASTF_00005604	XLOC_003003	729	156	0.8626	-0.711255	0.0109225	1	0	0	GTCGTCGGCGGGGGGGGGTTTAAACAAACGAATGAATACAAGGATATTAGACATAATAAGGACAGTAGTAGAGGTAATAGTGTGTGCATGTGCGTGTATGTGTGTGTGTGTGTGTGCTGGTGTGTTGAACGAACAAAGCGTGAATGTAGTAGAAAATCGGGGACTGTACCATAAATGCGTAGCGTAAGTGTGTGATCGGGAGGCGCGAAACAAGCATACAGCAAAGCACAACAAAAAGGAAAGAGCAACACACATAAGGAAAAACAAGGGTATAAGTACATTACATACTAAACAAAACAAAAAAGAAACAACAAAAAACAAACAAAACGAATAAAGAAACAAACAAACAAACAAAAATACAAGAATATACCGTTTAAGCGTTAAGTGTAGTGTATGCAT…
ASTF_00005607	XLOC_003006	298	243	0.8178	-0.123244	0.130488	1	0	0	AATCGGATAAGAAAAAGTCCGAACCTAGTACTACCAACTTTTCACTTTCTTCTCCATGATCACGTGTGTTGTTAGCAAACACCACTGTAAGATATTCCACCTGTGCGGATCAAAAACACTAAACTCTCTGGTACGGAATTCTCTTATCTTGCACTTGGAATACAATTTTCCCATTCAGATTGACACATTTGCACATTCGGCGAACAATGCACCGGCTTCCTTTTATACACTGTTCCTCTTCCAGTGTTTATCCAGCGCAAAACACACCACGCCAAACCTGCCAAGCACGAACCCGACC
ASTF_00005608	XLOC_003007	739	225	0.9267	-0.421409	0.0460259	1	0	0	AAGGTTGCCTGTAACTGATTATCATTAACGATGAATTAGTAGCTTCCGCAATAATTCTCTACCACTATCACCGAGGTGACCCGTTTACACTACTCAAACACCTCATCATGTGTTAATTTCCATTTACGAAAATGAAGACACAGGGATAACACTAGTGCCGGTGGTGTTTGGAGGGCCGGATGGTTGCGAAAGGAAATGACACCGTTTTCTAGCTTCCCATCGTTGGTCGGGGTTGAAGCGACCTACCGGCGATACTACTGCTATAGTCGGGTTGCCACTAGCCGGCATACCTAAGGACAACTTTTAAATTGTTTGTTCAACACCGAACACCGTTTTATGTGCCTCATTTTTCCTACACTTTCCACTAGATACCTGTGGCACGGCAGAAACGGCCAAAAC…
ASTF_00005609	XLOC_003008	923	90	1.1302	-0.537086	0.0156898	1	0	0	GAGAGAGAGAGAGAGTTAAGGTGTGTGTCAGTCAGAGGCTGTTCGGGCGGGATGAACTGCTGTGTGAATCGGCAGAGCAAGTAATCGGACTAACAAAAATGGTTGTGTCGGATCCGAATCCGTGGGGGTGTGTGTAAATATTTCCAACGTTCCAACCTGCTAATATACCCATTTTCAATGCGATAGTTTGATACCTGTAGTCAAGTCCTTCAATACACATACCTCCTCTAAGATAATATCATATGCGGCGCGACACAACAGTCAGTGTAGGTTAGATGATTGTTTGTAATTCCTTTTCTATACTATTCCGTTTTCACTCCCATCAACGCCCCCCCCTAACCCACATTTACATTGCCTAGTTTAGTCAGGTGCACCTTTTGCTGGTGTGTGAAAGACGTA…
ASTF_00005615	XLOC_003014	309	93	0.7848	-0.234559	0.0265944	1	0	0	GTGCACAAATTCAACCGGGTGCGATCTTCTTTCACGGCAAGCAGAACAAAAGACACGCACACGATTTGCATAACAAACTAAACAAATTATGCCCCCTTCCCGTTTGGGAGAATGGAACCATTTCGCCGTCATTAATCAGTGAGCTCGGTGCAAAAAGGGTGCTCCTCCAGGTGATGGTGGCTTGAATAACAGTGTCACTTTACGCTGCGGTGTCATGCAAAATCGGTGTCGCAAATCAAGGTCAGGACGGTGTGAATCGTGCCAGGTCGTACCAGCTGGCCGGAGGATGTGCCAAGTGTGTGACAAACA
ASTF_00005616	XLOC_003015	539	132	0.5386	-0.959901	0.00242577	1	0	0	GTTTATGATCGATCATTAAATACTCTTTAGATAAGAATTACTTTTAATAACTTTGTAAGAGATAAAATGCTTCATTTTCCAATCGGTTAGGTTGATGAGGAGAAATTTCCATTTCAAAAAAATAAGAGCTTGTCATTATTTTAAAGCCTCTTTTCCCCCATTGTCTTCTGCGAAAATCTTTGTTTCTCTTATTCACCCTGAAAATGTCCTAAATAAACAACCCTGAAAGCGGATCTGCCCGGTGAGTTATTACCACCGATAATCACACCATATCCAGTTGCAAAACACTTCACCACTGAGCACCGGGCTGGCTGCTAATAAAGTGTCTGCTAATTTATGACACACTGTCATGCTGCACAGCTTCCCATCCGATCTCGTTCCCTTATATCATCTTCCCCA…
ASTF_00005641	XLOC_003029	354	87	0.9523	-0.567661	0.0179571	3	0	0	TGTCTGCTGACATCTGAGGAAGCTAGAAAACGATAGTGATATCCGGGTTGGAACGTCCTATTTACCGTCCATCGAAAATGAAACCCGGTCCCACTTGGAAGTGAAGGAATTGTATGATGATTTGTGCACACAGATCGCGTGCTCTTAAGTGTAAGTGTCGGAATCTTATTGGCCCCCCCCTCGTATATGTCCTTCACTAATTCCAAATAGATATCTTAATACGTCTATTTCGATTCGCTTTATGGACTAGACTATACCTACTTTACATATCCTGTTTATTGAGTTACTTTTTTGCCGATACTCTCTAAACGTGGAAAGTACTGTGACATTCGCTTTCGTGCAGCTTTCGTTTGT
ASTF_00005642	XLOC_003030	896	177	0.6415	-0.246097	0.0162128	1	0	0	CTGAAATGATGGTTTTTAATATACGCAGATTGTCCTAACATTTTGTGAGGACATACAAGTTTTTCGGACTTGCCCTCTCTGATCTATGTTTTGTTTCTCCAAAATGTTTCACCATCGTAATGGCACAGAGGAAGTTACTCATGTCTTTCTTTTTGTTATTGTTTTATTTTATGTTTCCTGTAGTTTCCTCCTAAGACGGCCATCTGAAGAGGGACGACATATATTTGGTTGAAGGCTACACACACATCATCCAAATTCAAATCAAGCAAGGTAAGCATTAAAAATGAAGATCGCGAGTAGTGAGCGAGATTGCGTCCCGATTTCAGTCAGTCATTTATGCCGCTAAATGCTTGGCTAAATGATCTCCATTAAGGTGGACAAGATTAAAATGATATCGAG…
ASTF_00005694	XLOC_003062	1241	39	0.6839	-0.882008	0.000768458	1	0	0	CAACAGAGGGGTCCACAACGGAAGAGTCTACGAATCAAGCATCCACTACTGAGGTGACAGCTTCCGAGTCCACAACGGAAGAGTCGACGACAGAGGAATCCACCACTGAGGTAACAGCATCCGAGTCAACAACAGAGGAGTCCACAACGGAAGAGTCTACGACTGAAGAATCCACTACTGAGGTGACAGCTTCCGAGTCAACAACGGAAGAGTCGACGACAGAGGAATCCACCACTGAGGTTACAGCATCCGAGTCGACAACGGAAGAATCTACTACTGAGGTAACAGCATCCGAGTCCACGACGGAAGAGTCTACGACGGAAGAATCCACTACTGAGGTAACAGCATCCGAGTCGACAACGGAGGAGTCCACAACGGAAGAATCTACGACTGAAGAAA…
ASTF_00005720	XLOC_003079	4896	297	0.5692	-0.0119493	0.000301504	2	0	0	ACAGTGCAATAGCTCTGCCATATCGCAAGTTCCTTTCGCTTAGAGATTCTTTATTATATGCACTTCAATGCCGGCGACGACCATAGTGCAGTAACCTTCATGAGGAACAGGTGTCCCTCAGTGTCTCATCTTTTCTCTCAGCAAGTGGACTTGTCTCTTAATTTGTAGGATATAAAACAAACCTTTTTACAGTCTACTCGAACGTCAACCAGTCTTTAAGCTCCAACTATGACGTAGAGATCGGGAACGGTTTTCAGCTTAATGTAAGCTCTTTCTTCCCATCTCAGGAAGGCCTACGTTACAAGGCCTTGCTCGTCAGTACAAACCAGTGTTCCTGGGACATCTATATGTGGTTTAACTTACTTACAACTAGAAGTAGGCAGACATTCGTTTTATCCA…
ASTF_00005726	XLOC_003083	1965	207	0.5988	-0.360943	0.00339153	1	0	0	CCAGTATGGGCGTTACGACCCGGTTTCATCGGGCAGCCTGCACCGGCAACGTGCTGCTGCTTAAGGAGGCAACACGCTGGGAGACGAACACTCCGGACGAGAATCTTCTGACACCGGTGCTTCTGGCCGCTGCCCATGGACACCCGTTAGCCCTTTCGGTGCTATTAAAACGAGGAGGCGATCTGACGAAAACGGATCGGTCCGGTAATGCGGCGTTACATCTAGCGGCTGCTGCTGGCCATCGTGAGTGTGTGGAATGTTTACTGAAGGCGGGTGTCAACGTGTTCGAGATGAACACATCCGGCCGGACAGCGCTGGATGTGGCGAAACTTCACCGTGAGTTTGAGGTGGCTGAAGTGCTCGAACAGTTCGAGTCGGAACTGTGCGCCAAGAATTCGG…
ASTF_00005729	XLOC_003085	559	144	0.8422	-0.538971	0.0173667	1	0	0	ATTGCTGCAGGAAAGCTAAATAAAATGCCACACACGCACACACAACATACTGCTGAACATGAGCCCAAAACCGATTGAAAGTTGTAGTAAAACATTTGAGCTGTATGTATAAATTTTTAAACTACACAACTACAAAATCTAAAACTAGGATCACGATCACGTTTTGCGTAGCTACCGAAAACAAAAAGGGCCATGGGTTGAAAGGATAAGAAAAAAAGGGAGCGAAAATCAGCACCGAATGCTACAACTGGAAAGGACATTCAAACACACACACACAAAAACACTCATACAACACGACATAAGAAACAAAACTGCAGAAATAAAACAAACAAAAAAACACACAGACACAAGTTAAGTATCGGAAGAGAAGCTAGCAGAGTTATATACTGAAGTAATTAA…
ASTF_00005796	XLOC_003115	3670	657	0.9944	-0.00450388	0.121438	4	0	0	CGCAGCACAATATTTTGCAAAACACACTGTACAGTTTACAAAATTTATAAAGTTAAAATATTGAATGAAAAGGGGAGTAAACATATAAGACGTTGTACACATTAGTGTGTTATTGATACTCATGCAAAGAAACTCGCTAGTGACAAGGTGAAGTACATTGTAGGAACATAACCTTTCGCGGGTGTTCATAAGTTCGTGGTTCGCACCGCTAAAAATCAAGAGGACAAACTGGTTTAGAACGCGCCAATGAAGAATATTAACATTCCAGAGAGTGTAACCGCTCGAGCTGCGATATGAGTTCCCAAGATAATCGATACGATAATACTGCAACACGGAAGTCACGCTGGAACGATCCCAACAGCAGCAGCAGTAAAGCTTCCCCTGATAGATATCGAAACC…
ASTF_00005804	XLOC_003118	492	171	0.8113	-0.659264	0.0165665	1	0	0	AATGGCTTTGTTACGAGGTCCCTTCCGTGGTTGTACTATACATATGAAGGAGCTATAGAGGGGGTGAAGAAGAGAGCAAAAAAAGGAAGTGCGAAAAAAGGTGTAAAATAGAATGCAAAACCCTGTCCTACTTAAAAGCAGCAAGAAACAAAAAGCGAGCGCCCGTAACATATATTGTGTAGCTATATTATCGTACTATTGGGACTATGCATTACACCGAGTAACGTGTGTTGTGCAGCGAAAGTTGTACACTAAAGAAGGAGCAAAAGTAGGTAAAAACATAAGATAATAGATACTTATCAAGACGAGCGCGCGCTTTTTTTTCCTCTTCCGGTTTTCCCTCCCCTAATGACAACAACAATCACATTAAAAGATTCCTCCCCGCGAGGCGTGAGCGAG…
ASTF_00005812	XLOC_003121	737	135	1.3108	0.347169	0.298089	1	0	0	TACGCTCTTCTTAAACACACAACACAACTGTGAAATTCACTTTCAATGACATCGCACCACACACATGCATGCGCACAACACTGCATGTCCAACGCTTTTATAGTTGCACGAGCAGGGACTATCACATCTACCACGTCACGAGTCCTGAACCGGCGGCATCGATCGCAAAGGACGATGAGGCGAAGCGTCCTGACAGCAGGGGCATTGCCTCGGTCTATTCACTGAACTGTCGTCATGGTGGAGGTGGTGACACGATTAGCAGTGACGATGACGACCAGGACGACGAAGACACCGATGGCACTGTGTCCACCTCGGCGTACTCCGTTGCGTCGTCTTCCTCTTCCTCTTGCCATTCGGCATCACGCAACTGGCTTGAGTTGCTGAGTCCCAGAATTCCTA…
ASTF_00005817	XLOC_003123	2178	429	0.6026	-0.251512	0.0232679	1	0	0	GAAAAACGCATGCAAAGTGGCGTTGGCCAGTGCAGCCGAGAAAATTGAAAGAAGCAGTTTCCCTCGGTACGAACAGCAGCACCGTGCTGCCCGGTGGAGTTTTCTCCTTTTCCTCGGTGAGTGCGTGCGACTCTCAGTCAGAAAGACGGCAAAAACGGACCACAGAACTACAGTTGCGGTGGAGCGCTACCAAGCGATGCGGGAAGAAAACCAAGCATCGTGAAAGAAAGCAGGAAAAATGGTAAATGGTGATCGATAGAAGGAGACAAAGTGCGTGCCGTACGGGGTTGCCCACTAAAAGTAGAAGAAGGTCTGCAGATGGTTCGATAAAGCAATAGCACGGTGTCCGTCCTATGCAGCAAGGAGTGTGCGAAGAAAGCGAAGCGAAAAATCGTTAAT…
ASTF_00005833	XLOC_003134	232	24	0.7582	-1.41752	0.00092345	1	0	0	ATTCAATTCGGTTGTTGATCTGTTTGACCACAATATCTCCATTAATTGTTTCCGCTCCCGTCTTTTGTCTTCTTTATCCTAAAATCTGTTTTTCTTTTCCTTACTAGCCATCTCTGTCTGCTCCCTATATCCTCCTTACGTGTTATGTATGTTTAGTTATAAGATAAATTGACTTTGTAAAGCCCTTGAGGCAAACAATTTGAATAAAGAAGAATAAGAATAAGAATAAGTA
ASTF_00005834	XLOC_003135	455	120	0.5469	-1.05662	0.00199313	1	0	0	AGCCCTTTAGTAGAGATGCGATAGAGAGCTATTAAGAAAAACTCAAGCATAATATGCGATAACACAGACACAGACACGGACACAAAAAAAAACACATGAGAAGAACAAAAGAGAGAGAGAGGAAAACAAAAGAACTTAAAACAAGTTTAATTGTTTCCTCTAAACACAATGTAAGCAAAACAGAAACACACACTCACACATACACGTATAATTAAATGTAAAACTGATTTAATGATGATGATGATGATGTTCTAACAAAACTGTAGGCAGCGTAGCTACGCTTGTCCTTAGACTCTGACCAGTAAGATGGAATGGCGAAAGAAGAAGGGTACAGCCATTGTATGGTAAATTCCGCTTTAGGATTGAACTTAAAGAAGCAGATGAAGACAGGCAGGTACA…
ASTF_00005835	XLOC_003136	476	99	0.3752	-1.54548	0.000303176	1	0	0	CAGTAGTGACGGTGAGGAAGAAGATACTTAAACAAAAAGCTAATCAATAAAATCCCATATTCACGCCCTAGCTGGCGATAGTGTTTGTAGGTGTTTGTTGTATGGAAGAAATGGAAAAAAAGGAAGTCAGAGAAAAAAAAAACCACTGTAGAACTTAAGCAAACAAACTATTTCCCAAAAACAAGCAAACAAAAAAAAACCACACATCTAAATATAACTAAACGTAGTGTATTATTATGATTCTATTAGTTGTCATGCGTATGTATGTGTTAGAATTGGGGTAAGATGAATAAAAAACAAACATACAAAAGACATTGGATAATAATGTTGAACGGGGTGGGAATAAAAATGGAGGCAAAAAACCAAAAGTGAAAGAATGCAAAATTCAACACAAAAAAC…
ASTF_00005836	XLOC_003137	789	114	0.5619	-0.440026	0.00540299	1	0	0	AGCCACGCACACTTGAACAAACATACACATACAAAAACACACACACTTCCCCTCACTCCCCATCCCCACACCACATGTGTGCGTGTGCTGGACAGCTCTCAGAAACACTCACACACACACATTCAGAAACAAATATACATACAATGTAGAAAAACGCATCGTTGGCAGTGCTTGCGGAAGAAAATGGGCGCCACAATTTAGCTATTACACATTTAACCTACTTTGAGACGATGGGCAATTGGGATAGAGAGAAAAGTAAAAAAAAATACAAAAAAATGGTAAGAGAAAAGCGTTATGTTTGAGGCAAGAAAAAAACACAACACACACACACATTGTTAAGTATGTATTTCGCCAACGCATGTAACACAGCTATGAGCAACAAGATAAAAAAAATGGGAA…
ASTF_00005837	XLOC_003138	553	135	0.5226	-0.516877	0.00662311	1	0	0	CACACACATACACTGATATGGCTTTATGGCTACATGAAAGGCAGGAAAATGATTAATTGAAAATCAACATCGCATCCTCGCCATGCAACATAAAAGCAACAACAGTCACACAGTAATCAACAATATTTTCTGGCAAAAGTGCTTAATAGGAAAAGCGAATGGTGAAGAATGCGAAGAGTATTGGAGAAAGAGAAAAAAAGAACAGAAAATGATGTAATAACAGGAAAAGATAAGTAAAATGGAGAGGAACGGAAGAGCAGCAAAAGATGAGAAGAAGCAACATCCTGTTAAGAATAGCAAAAAATAGAAGAAGAAAGATCATGGAAAGGAAAACCCAGGTAAAAAGAACACAAGCAACATCATGTAAAGAAACAACAGAGAAAAACGAAAGAGCAACAT…
ASTF_00005839	XLOC_003140	720	156	0.6313	-0.759238	0.00497152	1	0	0	CTCGTCAGTTTGAGAGAGTGGCTAGTCGGCACGGGGAGTTAAATCTCGATTGAGTTGTTTAACTCATCAGTGGCAGTGAGGAAATGATTAGTCGACACGGAGAATTAAATCACAAGCGAGCTGAAGTAACTCTTAATCTAACTCATTACTAAGATTTACGTCATTCACTCATTCTGATTCAATTTGCGCTTCACTGCTAAGGACCCCAACTAAATTACACAAATGTTCTACTATAATAGTGCGTGCGGTGGAACTGAACCGTGGTGAAGCAAGGGATGAATAAGGGCAAAAACGATACTTCTCCGCTTCTTACAGCGTTTCTCGTGTGCAACACTTTTTAAGGGGGCAGGATGACACGATGTTGTGATAGCGCAGTTAGATTATCTTGTCTTGTTTCTT…
ASTF_00005841	XLOC_003142	903	171	0.8975	-0.332034	0.0264407	1	0	0	AGGTCAACGGTCCAGTTGGACGACATATGGCTGACACGTGCACTAGTCAACGTCTACTCTTCATTCCGAAGCGTTTGAAATTTAGTTCCCTTTTCAACAAGTAAGCCAAATAGAAAAAGACGAAATCGAAACCATCGAGAAACACATAAAGAACAATTTCCATACGGCTTTACTTCACCTCAGCTTCGTTCAGGTCTTAGGATCGCAGGGAGGTAGAAAAGCCCCAATACGCTTCGAAAAAAAAGGTACACCAAAACAACCATAAATGTCGATCTTCTTCGATGATGCGCAAGAATGAACTTTCTTCCCTCGATTCGTCAACCTCGTACGTTTTTTTATTTGATGGCTGTTCCCATCGCCTTCCACTCCATTTTTTATTTTTCACCCTGTGCGCTTCTT…
ASTF_00005843	XLOC_003144	824	132	0.7187	-0.0328871	0.0248265	1	0	0	AGGACAACTAACGATGTCATTTCTTGCGCTATTGCGCTAGATGAAAGCCGAGTATGGGAGCACGCGAACGATAAACCCGAAAAGCCCATACCGCCATTAGCAGTAAAACGTGAGCAGAGGCGGCTTTTCGATAAACATGGCGCATTTTACACGGCCATTTTCGTGCTTGAACGGGTGGATTATGATTGAAGTAGAGGGAGAAAAGTTCAAAGAGATGGGCTGTTCTAATGCGGCCGATCATTCTGATGGAAGCAAGCTGGATGCATAATTTGATGAAGATTATGCAAATAAGACGTGTTAAAGCTTGTAACAGAGGACGGAGTCTGTAGGACATGGAGAGATAGTTGTGTTCTACTAAAACTCATTACGTCTCAATAGGCTTTTCACAAGAAGTGTAGT…
ASTF_00005844	XLOC_003145	832	213	0.593	-0.271658	0.019716	1	0	0	AACTGTGTACACACACATTAAACGAGACCGACCAGCTTCTTCGCTCGGTGGCCTCTGTGGCCGTAGTATGCGCCCCATAGAAGGACTTGTTGGAGGCACGTACTTTTGTGGCTGCCCGCGACACAAAACAAGAAAGACGACTTTCCCTGTACCATCGCTCCATGTCGTTTTGCCCCTTTTGGGGATCCGCTGCCTTGCTTAGAAAAACAAACAGCTCGCACCCGGGAGTAGATTAGTGGTGCTGTGTTGGGGTCTATTTCTGCAGGAGGATGATGTTTCTGTTGCGCGGCCCTTACCTGGGATAGTATTGGTCGTATCAGAATCGGAAGTACCAGGGATGTTACGACGGGCGCATCATCTCCCATTGTCATTGCTTGCCAAACTCGCTAAAGGGCACTG…
ASTF_00005846	XLOC_003147	2105	234	0.8286	-0.204356	0.0101966	1	0	0	ACAAAAACCCGGAACATTACCTGTATCGATTGCTTCCACAGAACAAAACGAAAAACATAACATAAAACAATACCACATTCAAACAAAAACAAAGAAAAGAAAAGATTAAGATTAAATACAAAAGTGCACAAATACAAATGAAGGGAAAAGGAATGAAGAAAGGAGAGTAAAAGTTAAAACAAAAGTCTAATAATGCAATATAAAGCAACCACACTAGAGAGTACTTTAGCGGATGATGGTAAAGAAGAAGGTGAAAAACCCAGAGCAAATTATAAAAACCGACAAACAAAAATACCAGTGAAGGAAGGAAACCACGTACCAATGTGCGACAACCGCAAACAGCTATTCAAACTCCTGCTCAGATGTCCACGATATGTTCAGGTTCCCCGAGGCCCCTCC…
ASTF_00005847	XLOC_003148	1586	90	0.644	-0.509642	0.00162133	1	0	0	CCTCACACACTCACACAACCAACCGAACCAACCAACGCAAGCAATAGTATTAGGTGTGAAACACACCGTCCCATACCAATAGAGCAACCATACCAACACTTCCAACCACAGCAACATTACCATTACTCTACAATATACACCAACACCATAGCCGCCATAGCCACACCGACATACACAAACGAAACAATAGTTGAAATGTTGATTTTCTGTTGTTTCTTACCAAGCAATTTTCGTTCCAAATGAAAGTGTGATCAATCAATTAGTTTTTTTTTGTTAATTTAAGTTCTTTTATTTTCCCTTTTTCTTAGTTATTCTGTAATAGAGTAAGCCATTTTTGTTTTGTTTTCTCTTTTACCATTAAATTAACCGTTGTCAATCAAGCGCGAACCTGGAAGATAA…
ASTF_00005848	XLOC_003149	1041	219	0.872	-0.387815	0.0272194	1	0	0	AAAAAAAAAATGCTTCTCAGTGAATATTGAACAAAAATTGTGGACAAAACGAAAAAAGATGAACTGAACTGAAACACCCAGTTTGCTCAACGAACTCCGCCATTTTTATTTTTTCAAAAGGAAGAGAATCCCTCTACCTGTCCAGTGAGATTAAGTTGTCTTCTTCTTCTTCTTCTTAAATCCACATTAATCCAGGTTGATTTAGGTTCCTCTGATTGGCCGTTAGCGACGATGGCCGATCGATAGTTAAGAACGTTTGCAACAATTCAACACTAACATACCTCGAATAGCAGATACAGGATCCTACAGGTTTGATGTTTGGTTAGTCCGTACAAATAGTCCAGATGATGCGTATGTGTGTGCGTGCGTGTGCCATCAGCATTGAAACCCAAAACCCCG…
ASTF_00005849	XLOC_003150	732	99	1.0008	-0.26133	0.0283165	1	0	0	AACTGATCTCCGAACGGAAGAAGATCAGCTGATTTCGCACTTGATGATTTGCTCTCGCTCTACGTGTTTGTTTCACATCTCCACTCTACAATCTACTGATCAGGTAGTTGTTTCTTTGATCTGGAATCAAAGTGTTTAATATCTCCACTTCAATTCTAACCTCAACAGTGAAGGTTTAATACTTTACATTCACCTCGTCGATTGCACGCACCCTTCCCCTTCTTTCGCTTTCTCGACGAGTACAAGGGATGGTCGCCAGTGCCACGCATAGAAACTCCAACCACGCCACGCTCGCACGATCACACCGGGAACATGTCGGTTAGGTTCTACGTTACGCTACCACCCTACACTGGTGCACTTCGCGTACCAAGGTCATCCCCCTAAGCGCAGCCCCGTGTT…
ASTF_00005850	XLOC_003151	2533	309	0.5823	-0.561822	0.00229928	1	0	0	CCATGCCAAACAGTAGTGTAATAAGTGTACGGTGTTCTAGTGTAAGATTATTTAGGAAGTAGATATCAGCCAAACAGGTAGTGCATTTCAACAACATTAACAAAGCATTTAAGCAACAGGTTGTTTTACTCCCCAAATGTGTCTCCATTTGTTTCTGTTTTCTCTTAATTTGTTTGTTCAATTTCACGCAACAAGGCAAGGTTACAACGCAACACAGAGCAAACTAAGGCATGTGCGATTTAATCGACCTCAACAAAACGGTGAGCGGGATATTAGAGGATTCGGTTCGGCATTTCGTTCGTTGGTGGATTTCGTTAATCTTTTCTTTTATCAGCTTTTGTTTTCAAAATTCAACGACCTTTTTCTTTACCTTTTTTTCTATACATTTCAAGAGTATTT…
ASTF_00005851	XLOC_003152	400	90	0.6798	-0.0889892	0.0236877	1	0	0	TATTAACACCTAACATGGGGCTCTTTCCATCATCAAGCACTTCCACCGCGTGTTTGTACAATTGTTAGAAAATGGAGGAATCAATCATCATCAAGGTGACCTGTCCTATGCTAAGACATGTAATAGCACGCGGGTGCTGGTTCTCTTCCTAAACGTTAATTGGCAGTTAGTTTCGCTTTACGGGGTATTCTTCCTCGCTTCCTACATCCTTCTTCATCCTTCCTCCTCGTGTGTGTGGTTTTGATAGTGATTCTGATTTGTGATAATATTTGAGCATTCTGAGTGGCCATTTGACCGTAAGTAGTAAGAAATGGACAGCTACCTACCTTCTGCTTGTATGGGATACACATGCAGCCGATCGATGATTGTAAAGATTGTGTATTTTCTGCGCGTGTACATT
ASTF_00005854	XLOC_003155	501	165	0.5423	-0.672862	0.00679028	1	0	0	TAGCTCAATGTTTAGCTTATTAGCACTGCGGAGCTTCCTTCTGTGGCTGCTGTGTGGTGGTGGGGATGAATATGCATTCGGTTGAAATTGGTTGCTGTTTTGTATGTATATCGGTATGTATATCTTTAATTTGTATCATGGGTTTGTTTTCCCGCCCGTTTTCCAAAAAATGGTTGCATGAAACGCTCTAAATACGTTTCTACTCGCTTTGCTGCTAAACGTTCATCGTGTGTCGCACACACTGGTATTTGGCAAATATGTTTTCCAACAAGTTATCCCCCGTTGTTCCTAAAAGGGGTTAGACGCAATTTTGTTCTTTGTTTCCTCTATTTGATCCACTAAACACTTACACAGAATCCAAAAGCTAATTCTCACCCTCAAACACCTAATCAACACCGG…
ASTF_00005855	XLOC_003156	1412	213	0.6187	-0.30319	0.00912812	1	0	0	TCATTTACTGGGCAAGTAAATCGCTTTTTGTCCAACTCGCTTGCAATGCAAACGGTGCCGCCCCGTGGAACGCAAGGTAAAATTCAAATAAAACTTTGAATTACGTTTGCCCTCAGTCTCCGTTACAGCAGAGCCATGCAGTAAACGAGCCACTGGTTCGTTTCGTACGCCACCAAAGTTACAAAACTCACCGATAAGACAAAAACTCATTTTCTTGTGAAAATATACCCTACAGTACCGGACAACATCTCGCGTACAATATCGACGTAAATTTGGTTTGTTTCTTGAGCTAGTCTACAGTTAACCGCTAACGCGGCCTTCTTATGCTTTTGTTTTTCTTTTACATCCTTATAGTCTTTATCCGTTTATAAAAACGTTTCTCTTTTAAATACTTTTTGT…
ASTF_00005859	XLOC_003160	680	183	0.821	-0.0180818	0.0639018	2	0	0	CTGGGCGGATCGAAGTGGCAACTGGGAAAAGGACCACCCATCCTCGGGCAAATATTGACTCAGTCGAAAATTGAATTACTGCGTGATTATGACAAAAGCACGAGATAAAGGGTACTCACGCAGGTGCAGGTGAGCCCCGGATCGGACGAAACCACCTCGGTCCTTACCGGCGGACCGGAGAAAGGATAGCGTCGGGCTGTCAAAACATACGCACCGAAAAACCCCGGTCAAGGATATTGGAGTAAAAAAAAAACAAGCAAAGAAGCAAAATCCGGCACACACACACATCCTCGAGTGGTCAAAACCGGGGCCGTGACAAAAAGCGAAACTAAACAGAAATGAAGATAGCCGCATGGAGTGGAGAGAACTAAACGAATAAAAAACCGAGCCCAGGAAGAT…
ASTF_00005860	XLOC_003161	2524	276	0.6699	0.0177811	0.00885069	2	0	0	CGGACGGCGGGGCAAAGGATGGGTTACCGTTTGCACAGCGGCCAGCGGGCTGTGGGCATGCTCTGAGCATGCCGGCTAGTGGCAGGCCCGCTTCGAGGAATTGACAGTTTATCGATGGAAAAGACGCCAACCGCACTCGTAGTGACAATTTTTACGGTGACAGATTCGGTCGCGACAGGAAAATCGACCACTATACCAGGGGAATGTGGATAAAGAAGAGAGCCAAAGACAGAGCCAGTAGCAAAAAAGTATAACCGAAGGTGTATTTTAAAATGTTCTAACAAATAACAAATATTCTAAAGTGTAGTCCAGTCTAGTCGCGAAGTGCATGACCGAGTTATTCCGCTGAACCTGACGAAAGTTTTGACAGGCCTCAAAATGTACGAGCAAAGTTGTGCA…
ASTF_00005861	XLOC_003162	1678	162	0.516	-0.308532	0.00296754	1	0	0	CTGCTTTACAGTATTTTCCTCTCATGAGCTGCTTAAGGGCTGTTTAAACGCTGTAAAAGATTAAATAACTTCCTATGATAAGATGGCTAGATTGACCAAGCAATTAAAATTTGATAGAGTTGCCATAAAATGTGATGGTTTGTTACCGTATCCCATCCATATCGTGCTCTGCCACTCATTTGATTTACTTTTCCTTAACCCAGCGATAAACTAATCGATTTGTGTTTTTAAATCCACTTTCAAACAATTATCTTATCATTAGCAGAAAAAATCGAAGCGCAAAGTTTTCTTCCTTCCAGTCCTTCATTGTTTATCGCTACCTTTTTTTACGGTTGTGTTGTTTGATTGAGTTGTAAGTGATAATGGGGCTGGTTTATCAAATCAATCGCGTCCCGGTGT…
ASTF_00005875	XLOC_003170	442	114	0.8247	-0.265151	0.0280021	1	0	0	CCAAACCCAACACAATGGAACACAAAATACAACCGCAACATTTGCCCGTTTCCGTCGTGGTGAGATGGGTGAACGTTTGTACAAAGCTAGGCAAAAACAGAGACACATGAGATCAACTAGTATCCCGTAGCTAAGAACCAATGATGAACGACTGGACGGTGGAAGGTTAGCCATGCAAGTAAAAAAAACGTAAATTTTAAAATTATTTTATATCAAACTAAGTATTATCACACAAATACACACTACACAAACATACACGATACATGAAGAAAACATACATACATACAAAGAACACGTCACTACTGGGACAATGCTGTAAGTAAATGCTGAATGAACGAACCCAAGAAGATGGTACGCGGCTAATGGCTAGAGTCATGCGTTTTGTTTGTCTCACACTAG…
ASTF_00005905	XLOC_003187	896	180	0.9334	-0.0198849	0.0647266	1	0	0	ATAGTGCCAAAACAGGCCTCGAACAGGGAGTTCTCGGGTGGGAAACCCCTACTGCCACCTAACCTGTCTTGATCCGACGGATTGCCGTTGGAAGGGGCGGGAGAGCGCGAGGGACGCACGGAAGGCAACGCATGCCGCGAGGCTTCACACACAAGGGCGCAAAACCTCGCGGACGCGCACGACGACCTTCGCCGAGACTCGTCCGAGTGGCGGACTCGTTGGACAGCTTACGTCACCGTTGCCGAAGCCGATTGGGTGGTTCTAAGTCAACGTACGCATCGCGATACCGGGGAGGCGAAACTGGTTTTTAGTTTTGCGTTGTTATTGGAGGCTTCACTTAATTCATGGCGACCTCTTTCCGAAAGACGATGCCGATGCGCCAACTTTGGAACAGGGAAC…
ASTF_00005930	XLOC_003200	1413	303	0.6104	-0.364385	0.0169159	2	0	0	TGTTTACAACACGTCGCTAGCGCGGCCGTACGTTAAACACTTACCCCAAAAACTACTTTACCGGAACACACCGCTTTGAGCAGCGGCTTTTTATTACCCTGTTTACTCCGACGACCGTTTTGTTTTTTTTTTAATTTTCTTGTTCATGGGGGAACAAATGCAGGAATTTGAAGCAAAAACCTGTTGTAGTCCTTTCTTTCGAAGGTCCCCGGGAACAGACATGCAGGGCACGGATTCTATTTTTGGCCACCAGCAACACCTTTCTTCGTACGACTCTCAATGTACGGCTTCCAGCGATCGAGCGGTGGTGGTCCTTGGAGTTAATGGTAGTACGCGGGAAGAGGGCTACCAGAGCTACCGTGGTGTGGTGGTAGACATCTCGAATTTCAATCCCGTTTT…
ASTF_00005938	XLOC_003208	1293	135	1.0793	-0.540303	0.0121244	1	0	0	GGCGAAGGAAGCAAAAATAAAAGCATTCACTCCCCCCCTACACTATCCCAATCACGGTCAGCGTGAACCATGTGTACGCGTGTGTGTTTGCTTGGTTGGTGTTGATTACGGTGTGTGAAAGTGTGCTATCAAAACACCCACGTACGACACGGCAGCGATGAGGCGACCAGCGGCGGGCAGCATCAGCAATCCGTACGAATCGCTACGGGGATAAAGATATTTCTGTGTGCGTGTCGAATCTATTGTTCTAATCGTGCAGTTGTGTTTTATGTGAAGCGAAAAGTAAAGAAAGAGCCAGAGCGAGCGTTTGTGTGCGTGCGTGCGTGTGACGGTGCAAATCTGTCAGAAGGAAAAAAGAAAAAGAAAAACAACAACCGCCGGAGTAAAAGCAGCAGCTGA…
ASTF_00005983	XLOC_003237	466	87	0.6081	-0.254721	0.0116443	1	0	0	AAAAAAATGCATTCGTTCCAGAAAAGTGTCCCAGCGGGGCATCGGTTGGGGCCTTGTTAGTGCAAATGGAGGAAACTCGGGTCTCCTCACATAAATAAAATTAGAGCATAATCAAAACGGATCCCCCCTCGACGGTAGCAGCAAATAAATCTCCCCGTGAGCATGTGTCCGAGTGGTTCGAGGCGTTTGTGTGGTGAAAAGAAGGGAAAATGAATTTCGGAGTGTAGCGTGCGTGTCAAATTTAAGCTCTCAGTTAGGCGCAGTAACCCAAAACCACGGTCGAAGGTTGGAGAGAAGAAAAAGTAGTAGTTTCGAATATTTCGTAAGATCAAAGTGTTGAAAATCGAGTCTCCCCACTACCCACTAGTGTGACAAGGGTTTGGCATTAAGTGATTTCCC…
ASTF_00005985	XLOC_003239	444	96	0.7583	-0.225596	0.0215869	2	0	0	GTGTTCCGTGTTCAGTGCCCGCTTGGAATTGTCGCTTTTTGCGTGTGCCATCTCGGTTGCGTGATATGCTAATTGTTCAACAGCATATACTCTGATAAAAAAGTGAAGCAAAAAAAGTGAAATTCAATATCCCAGAAACGAAGCAGCAAACAGAGAAAAAACCCAGGTGAAGTAAATAATGTGCGAAAGAGTGATTAGTTGAGTGGCAGCAAACATGATAAAGCTAATAGTGCAATGTGTGCGATCGAACAGGAGCAAAGTTCACTGGATGACGATCGTCTCGTGTTCGTAATTGTGCCAATCGTGCAGCAAACTGCATTAGTAGCCAGCTGTGTGTTATGCAACGGACGATAAGTTTTGCAGCGAGCAAAAAAAAAATAATCCAGAGTGAGCAAATCG…
ASTF_00006125	XLOC_003314	629	132	0.5537	-0.642843	0.00474977	1	0	0	TCGAGGTATGTTTTTTGTACGGTTTTATTCTATTTTTAATTTCAAAAACGTTATTTGCACACGGTGCGCTTCCATTCGTGGAGCTTGGTCTGCGCTCGTGCTGATAAGAGAGCGTCTTGCGGGGCCAGATACGGTATAAAGCATTCCCCGGCAGCAAGAAAACGGGAACACGAAGGCTACGGGGATTTCTTCGGGGCGGGTTGGTGCATTGTCGACGGGACGGTGACCGTGTGCAGTATCCGTTTCGTTGGGCCGCGGTGGCCTCGGAATGCACTTCTACAAACAACAGCGTCATGGCCCGCCAACCGAGCCAGAGTCGTGTCTAGGTAAATACTTTCAAATAAAATAATTAATTAGATATAAAAGCTGTTAAACAGCACTGGTGATGCTGCTGTTGGC…
ASTF_00006126	XLOC_003315	707	156	0.8692	-0.0799162	0.0491802	1	0	0	TCCCATGTTGGCTGACCCATTGTTGTCAGCTTTGACGACTGCAGCTGTTCGGGAAGTAGTTGCAGCTCACTCCCGTCGCTTATCTAATATCGATCCGGCCGGTACGGCACAAAGGGCGCAATTCAATTACAACGACGCTCTTGCATCCTGCTGGCAATAGCTGTTTTTCCTTCTCCTGTACCTTGTTTACATTGACAATCACAAAACAGACATGAGCACAAAACGGACACAATTTGTTAACGCAGATCAGGGAATCGTAACTCGTGCTCATACGCGTGTCCCAATTATAATGTGACCATCGCTAGCGGTCAGAACTAGGGGAAGACCCAAACTGATTCGTCATCCGACGAGCGCCCCACGCTGGACATCAACATTGATGTTAAGTTCTAGGGCCCACTG…
ASTF_00006128	XLOC_003317	889	204	0.4562	-0.866838	0.00278396	1	0	0	GCCACTGCTCTGTCCTGCAGGGCGGCGGGATCCACCCACCAAAACTGCTCACGATAGCGGACGCTGTATGCTTCCTTTTTGTCGAAGCAATTCATCGAAGCTAGCGGACTCAAGATGGTTGGAAATGGGGCAACTTCGATTGATCGGGATGCCTCATTTTCTTCTTAAGCGTGTATGTGTGTAGACGGAACATTGTTGTTTCCTTGATGTGTACCACTTATTTATTAGTACAATTTGCCAGCGCAAGTGTTTCTCTTTTTTAAAGCAATTTACATCATTTTACACATTTGTTAGTAACAAATTTGCATACTGATTTTTATCGAACTTTTATACATCCCCGACAAGGACGCGTAAGTCATTTCATCCATTTACTAAATACCAAAGTGAAGCCCATTTGTG…
ASTF_00006129	XLOC_003318	1245	258	0.6458	-0.574974	0.00969634	1	0	0	TGAGGAATGTGAAAAACCAAAAATTATTAAATGCAAGCACATAGCAAGAAGGAACAGCGCACCATTTGTAAGGCGTTTTTAAAGTATAGTTTTAGGATGTTAAACAAAACGCATAAGATATGTACTTTTTTCCCGTGTCGTTCACTTTCTATAAATGTTCCTTCGGTTTCGGATAAGTTCTCGCATGTTGAGGAAAAAAAACCCCATACGTTCGCTCCACATCGTTCGTTCATAGCTAAAGAAAAGAGGAAAAAAAGACAAAGCAAATTGCATAAATTAAAAGCATGAATAATGAAACAATACAAAACATCAAACAAAACAAACCCAACAAAAAAAAAACAAACAAACTGTTCTGAATTGTTCAACACTTTACACTTTGTAAAGCTGTCTCTTCTTTTT…
ASTF_00006130	XLOC_003319	748	288	0.5022	-0.375097	0.0254261	1	0	0	GATCGTGTGCCGTGTGACGCGATGTTCATCTTTTAGTTTGCCACACGTTTTAAGCGATTTGAAAGTGTTGGTTGGAGAGCTGTGTATGTGTGCGAGTATGTGTGCTGATCGGCCGATTGAACGTGCAGAAATTATCGCGAGCAAAGCTATCACGATTCTTAAATTCTTCTTAAGCAAACCCATCTTACTTGTGTTGGTGTACAATTGCATCAAACGTCTTTCAAGTGATCGTTTATTTAAAACAAAAAGCTCCCTCCCAAAGCTTTGCTCTTGTTTACCACATCCATCAAACCAGACGGTGCTGCATAGAAAGTGCATCGGAACGCTACGCCCTAATGCATCTGGAACATACCGCGTGTGTGGTTATCTGTAAACCTGTTCACTTCATGTACCGAATGT…
ASTF_00006135	XLOC_003324	317	42	0.9848	-0.957541	0.00562182	1	0	0	AAATGCTCTTATTACCGTGGATCGCTTAGTGTGGACAGGACCGGGTGCGTTACCGGTCGGACGACCGAGTTGAGTGGTTTGCTGATGTGGCGCAAAATGGGGGTAAAAGTGTTATCATTAAGGTGAACCTGATTGTGTTCTGAAGTTCAATCTGAAGATCTGAGTGTGAGGTTTTTCGTTGGATAATTATGGCGAGACTTGAGGGTGAAGTGTGAACAGTGCTTTTGATAAGACGTGAGTGATTTAACTGCGTAAAAGATCGGACGCACGGATTGCCTAGTGATTTCTATTACAGCACACACACACACGTTCACGCT
ASTF_00006136	XLOC_003325	1899	123	0.7516	0.257056	0.0119295	1	0	0	GAGGTACGTAGCCTGTTCGGGCCACATCTGCTCCCGCCAGAGCCTTCCCCCATGCTGTCAGATCTACTTCATACCCATGAATGGTGGCGTGAAATCAGCCGTGACTCATCGAATGCCGTGGTGTCGGTACGCCCGGGTGGCCGCGAACGCGAACAAAATCACGATATGGAATAAGTGGAGTAGTGGTCTCATCGCTTAGTTTCAGAAAAGTGAGATTCTACTTCTCCGACTTAATTCATATCTAGTTGAATCAACAGAAACTGCACAACAGAAATGCACCGGAAGAGAAAACGTACCCGTGAAGAGCAGATAACACTTTGTAGCGCGTGAGGCGAGTGAGGTCTCAAAGACCCAAAGCCTTTATAAATAAACGAAACAAAAAAAAAATTGTAGCGCGTG…
ASTF_00006137	XLOC_003326	403	174	0.5951	-0.324341	0.0220842	1	0	0	CTGAGAGCGTGTGTGTGTGTGTGTATATTTGCGTCCACAACCGAACCAGCTTCGTGTTCCCTTTCACAAAACCAGGACCAGAAGAATTTTCACCATTTCGAGCTATGCACCCGGCAGATTCACCATTTTTGGTGCACGTTTGACTCTCCAAAGGAATGGCACCCCATCACACACACCGAGCTCGAGCAAAGGCACAAACGCACACTCAGGCACCAATCTTTCTCGATCGCGAGAGGATCACTTGTTCCTCCAATTTGATTTCTGGAGCTTTATGGGGAAAAAATCCAATTGCTTTCCCCTTATTTGATAATGTTAAACACTGCACATAATGTAACGCCAGTTTCACGGAGCTTTCCTTTTCTTCTGTGTTTCGTCTCACGTAGCTCACTTAGCTCACCG…
ASTF_00006138	XLOC_003327	622	186	0.4062	-0.586493	0.00567719	1	0	0	TGTGTGTGTTTTTTTTGTGACGAAACGTCCTCTCGAGGGGTCAGGCACAAAGCAAAAGTCACGGTGCCCAACAGTGCATTTGTTCTTTGAAGAAGACGAAGAGGAAGTTCGAAAATCGACGGTTGAACGCGTTTATAAGGAACATTTTTGGCTGGCTGCTTGAAGGAGTGAAAGAGTAAGACGAAAACTCAGCTAATAACGCAAAGCATAGAAAGTGTGTTATGTTATGTATGCTGTGTAGAAAAGCTTGCATTTCATGTCGATCGTCCTCCAAGCTCGGAAAAAAACGTCAATTTGCCACCGACGAAATAATTTTCTAATTGTGTTAATGCAGTGCGTACGCGCGAGTGTATGATTGTGTGTGTGTTTGGGGAAGCAAAAAATCAATACGATAGAAAA…
ASTF_00006139	XLOC_003328	1466	234	0.6988	-0.550791	0.00723832	1	0	0	TTCACCCCTTGTACCTTCCCTTAGTTGTGTAGTTCATCCATTTGCAATACTTTCATTTATAGAGATTTTTTTTTTTAAATTAATGTGTCATTTACAAATTCTCCCCACCTCTCTTCTTTCGGACGCACGGTTGTGACACCAATCGCCAAACGCGATAACCAAGCAAGGTTTTGGTGGTGTCCCGTTCCAACGCTCCGTTACTACCCCCCCTCGCCCACCTCCGACAGATCTCATTTGATAATGTGTGTGAGCTGCTAAGCGCGCAAACCTAGGGGTTTGGTAGGGTTGCGTTTTGTCTTTTCTCGATTCTCGATAGACTCCATCCCCTCAGAGTAGACGAAACATTAGGCGGCAGCGTGGCGTTTGCATTGCGTAGCAGCGGGCAGACAGAAGAAGCAT…
ASTF_00006140	XLOC_003329	4117	519	0.7309	-0.264142	0.00545777	1	0	0	TGGAGTGAAACAGAAGCAAACGAACCAAATAGGAAACAAGGGTGAAGATGTGATTTGTGATCCAGTGATCATTCGGGCAAAAAGGACGAAACAAACTCACTCCAAGCAACAAAAAAAAAACACTGACATACACAAACACAGACAGGCCGTGTGTGTGGTGGTGGTGGGTGGTGTAGAAGGGGCAAGAGAATGGACAAACCACAACTCTAATATAAATATATATATATATACACCTTTAGTAAGTGAGGATAGAAATGCGTCGTGTGCGTGCGGAAGGACATTTTGAAAGGAATTTCCGGTTGTGCCACTATTTGGTTCTCCGAGCTTGTATGGAGAACTGTTTGTCCAGGCTCTGTCCAGGTCGGTCCGCCTTCCTGCCACTGGCGCAAAACGAAACAA…
ASTF_00006142	XLOC_003331	651	135	0.7803	0.0448469	0.0455473	1	0	0	GAAAAAAAACACTCAGACCCCATCGGTTTCGATTTCCTGCTGCGTCGCCCGCGCCTGGCGCACACGCTGCCCGGAAGTGATTCACTGGAGGTCGCGTAAACAACAACCACGCGGGCGTGGGTGAGCCTGAATGTGTGCGCGAGCGAGGTACGATCGCGCGTACGCAGCGAGAGCGCGAACGAACGAGAGAGAGAGAGAGAGAGAGGGAAAGAGACAGCGATTACGCAGGTGACGCGATTTTGATGCTTTCTAGTGTTGAAAAAGCAAACATAAATGTTGATTCCCGCCGTGCGCGACCGCACACAGGCAAACGAACTGGAATATGATCATGCCGGATGGAATCGGTTGAATAAATGCGAAATATTCGTGTATCGGCATTTAGCCCGTCACCGCAGGGCA…
ASTF_00006146	XLOC_003335	275	216	0.8465	0.193275	0.219398	1	0	0	TGGAGAACGACTAAGTACAAAGCTTGGGTGTTGTTGTTTTGAAGGGACACGATTTGTTTATGTTTGTATCGAGCTCGATTGGACCTGGCCCTGGTAGTGTTTTGATTGATCCAACAACCCCGTTCACCACCGGTCCGGTTGCCGTAGGAACCGAAGCCGCACGCGAATACCGTTGGTTTCTGCTGCGCCGTGGACAGGTCAGGGATAGGCACACACCTGGAGCGGAAATGCAGCGAAATTCCAACGTTTCCACACATGGAAGGAGGGCCTGCACA
ASTF_00006148	XLOC_003337	512	99	0.4045	-0.279908	0.00627018	1	0	0	GATTTACGCCTAAAGGTATGCAATCCGCAGTACACGTTGCGGAAGCTTCACAGTGAGCTTTCAGTGTGCTTTCAGTGTGGTCAAAATTGGTTGAAGAAAGCCGAATAAAATATTGTTATTATTTGATTAAAATCCCCTCTCCGCTAACCCTACCATTCATTTTGGCTTACTGGGGCTCGGTACTAGTTTTCGGTCGCACTAGGGGTGAACAATCGGGCCTAAAACATGCACGGCGTTCTCGGACGGTAACGGAACAGTAATTCGATGAATACTTGTTACCTTGCATTGATATTCAGCAAAGGAGGAAACATAAGAATATCATAATCACAAACCACTTGTTACAATGTATTGTATCAAGTTCTACTCGCTGTCTATTAACAGTATTAAGGAACAATGCAC…
ASTF_00006149	XLOC_003338	1238	375	0.8013	-0.324323	0.0742042	1	0	0	AATATTTACCCTCATAGCTTCTTGTACTTTCGGTTTGCTCGGTTGTGGATTGCGTGTTTTTGGTGGCTTTGAAGTGATATCATAAGGAAGTTGTGTTTTTTTNNNNNNNNNNNNNNNNNNNNNNNNNNNNNNNNNNNNNNNTTATAAAATAGTGTTTAGTTAGGTTAGTTAGTTAGCTCTATGGTAAGATAGTTACGTTAGTATAGGTATTAGTTTGATATTTTGTTGTTTGTTTTCAAGTAGCATTAGTTAAATTTTGTTTCTTTCATTACCATAACGAATTTCATAAGAACTTTTCTAAAACTTTTAAACATGCCTGCTCCCTGTGCTGTTTCACTGTGTCGCAATAAACGATGCGATGCAAAAAAACATTCGGTGGAGATTTCCTTCCACATTTTC…
ASTF_00006150	XLOC_003339	868	240	0.5264	-0.089178	0.0297883	1	0	0	CATCGTCGAAGATACGCTCTGTTTTTGCCAATTTTATTACTCTACAAATAATAATGCTATCCCAAACGAACGATCACACTTCGCTGCCACAATAAAACACACTTCGGCAACGTGGCCTTCGGTTTGGAGAATCCGTTTGAACGCCCCACACACAACACCTTCGTAAAAACTCACTTTGATGTTATTTTATACTGCGCTTTTCGTTCAGTTTTTTACACACTGCAATTATGGTTTCACACACTGCAAAAACTCCAACGTCTAGACGATCGATCGATCACAATCCTTCCATGGGGACCGGCAAAAACTGACACGATCTAAATCGATCTCGTTGTACCCATCCACCCCGATCGTTCTAAATTAATCCGCATGCAGTCGGGTGCCCATTAACTCGACGGTAAA…
ASTF_00006223	XLOC_003380	837	258	0.7414	-0.217596	0.0500445	1	0	0	GGCAATATTTATGTATAACTTTATTTTATTTTTCATTACCCATTGGATGTTCATAATCAAGCAGTTCTCTCTGTCGGCGTGTTGTACTTTCCGTTCCGTTTTATTCTGTCCACTTACTTTACACCAGTAATACGGAACCGGAACCGGGAATCGACACCATGGCGAAGACACACACACACAGAACACAGGGAGAAACAGAATGCTACCCTCCCCCCTCCCCCCTCAATCTCTTTCCATCTGTATCGAAGAGGTCCATGCTTCCACACGTTTAAGATTAAATTAAGTATACCACGATATGCGGGCGAGTGTGGTGGTTTTTGGAGGTTGGAATGAAGAAACTATGTACTACAAAAGAACTTCCCACACACACACACACACACACAAACAACATAAGTAAGG…
ASTF_00006272	XLOC_003403	1203	294	1.2691	0.130157	0.32783	3	0	0	AGCCAGCAAACCACCGAACGTTTATTTTGAAGCGGTTAAGATTGTGCTGAAATCAGTATTGTACTAAAATATGGAAACGTACACAGAGGTTTCGGGCGAGATTCGTGACCTGCAAGATGCAGTCGTCACATTGCGGATGAATATTCCGGCGTTGTATAAAAAGCTGCTGCTAAAAGAGTGTGAGCTTGAGCATCAAATGATTATTGAAACCGATGTCTGCGTGCCAAAACAGCCGGTTCAGGAGTTGAAGAAGATAGAACGGCTACCGAAACAGCTTTTTCCCGCTTCAAATGCAGCATCTGATGTCCAGGAAGTTCACAACTTGCTAAACGTTCTGCACAAGTTGTTCCCAAAAGGGCAATAGACGCGCGCTCATCAACAGTCCTGCAGCTCGAGGAG…
ASTF_00006291	XLOC_003411	1302	237	0.8944	-0.498924	0.0186061	2	0	0	TGTTTCCTCCATGCAGCAAGGTTACTGTTGCAGATATGGTCGTGATATAGCCAGCGATCGCCACTCCTTCGCGGGAACAGGGCATGGCGTTTTCTTTCTGTTTAGTGCGTAAGCGTAGTGCGTACTTTAGACGATTTAGTGTGATCCTCGTATTAGCCATTGCAAGCAGCAAGCAGTTTGTTTGATAGGACCACCCAGTACTTCTGTCTGACCCTCGGTCCACACTGCCATTCCAGTACAATCTGCAACAAAGCAAAGTGCCCTACCCTGAAACTATAACAATATACATGAAGCAAAATCGTGGTAGAACCGGAAGGATGCAAAACGTGTACCATAACCAGCAAACGTTCCTCGAGGCTCGAAGTTGTCTTCAAGGAGGCTTTTTCGTAATAGTTTGTT…
ASTF_00006322	XLOC_003430	508	186	0.8404	-0.356745	0.0403333	1	0	0	ACAAAAACGGAAAGGACGGCAGAAAAGCGGCAAGGCAGAAAAAGTGCGTGTTTTGTGCTAAAATATCGATGGAAAGCGATCGTCTGGCATAGCTCGGGAATTAAAGCACGCATCTGCTGGGCGAACGTATCGAGCTCGAGAACGCACACCGACGCTGGGTGCGCTGGTCCTGCGGAAAGTTTACCATGAACCCATACGGTTGTGAGTACTGGTAGCCTCTGTGGAGATCATAAATCATGTCTTTTCTTATTACCTTCCTGTGTTTAGATGGCCACAAAATATTTTGCACCCAGCTCACTCTTCTCACTTTCTTACTGTTTCTGTACCGCTGTTCCATTTATGTGTATCTCTGTTCGGTTTTTGCGTTCGGTTGCAATTTGCTGATGAATTATTACCTTA…
ASTF_00006352	XLOC_003446	1158	183	0.821	-0.652271	0.00791453	1	0	0	CTTCAAACCTAGCATCCAAAAAAAGAACAAACGAAACGAAATACCATCCAACGGGCACCAAAGAGTTGCTTTTGTGGAGGACAAAAAACACACCCACTCAAGGAGCCGCTATAGTATTACTGCTTTAAATAATGCGCTTGTAAACCAGGAGCTCATTTTATCTTGCTCTCTTGCTTCTAATCACACAGGCCTCACAATGTTTGCCGTTGGCTCGATTTATGCTCTCTATCTGTTGTTGAAAGCTTGCATAATTTATACTTTTTTCCCCTCAAAATAGTTTCAAGTGTGATGTTCTAGAATCACACACACACACATACACATGGCGTTAGCGTTCTGCTCTCTAATACATACGTTTTTCGTTTCCTTTCAATCACCACCAACTGTAACCAACTCTCTGTC…
ASTF_00006357	XLOC_003451	1612	285	0.5952	-0.194646	0.0157683	1	0	0	TCCCACGACAACCGAACACACACACAGCACTCAGCGCGGTAAACAATAAATGCAATAATATTAAGCCATTTTCTTACACAACACAACGTGGTGGAACGTGATCACGCTCACAGACACACACGGAAATTTAAATTGCCACCGGGGGAAAATAAAAGTAAAAACAAGGAAACAAAACGTAACGTAGGGAAAATATATGCAATCCCCGATTGCCTGCTTGAAGAGAGTAGGGAAGAAATCACAGAAACACACACTCAACACAAACGAAGCAAACGAAAATCCCAAATGAAAATGATAACTGCCGGTACGACGATATATGACGCATGTACGAAGATGCAACAACACTAGATAATTATGTCTGCGATCAAGAATTGGTAAGGTGATGGTGCAGTGTGCAAGATC…
ASTF_00006385	XLOC_003462	867	513	0.6266	-0.29071	0.223476	2	0	0	TATCCCGGGCCATTCCCAAAGGAACAATCAACATCGTCCGAGCATGGTCCAACCATGAAGATGCCGCATGTAATCGAACCGTCTAGGTGACAAAAAACACGGAACAAAACTGTCATCAGAGCAAAATTGCATAGCAACTGGGCTGCTTTTCAGTTGCAGTGTTCGTCGCTCCATGAACATAGTAGGCTGATATGATGCACGTCCGTTCGCCACGCAATGGCTCTATGAACACTTCAGTGCTAAAATGTAGTCCAGATGAAAAAAAACCCACCGAGAAGTAAAATAATTCTGAAGAAATGAATGCATAGCTTAAATTAGGAGGAAAATTTAGGGAATATTTGGGGAAAGGAATTTTAAAAACTACGCTCAGCAGATATCTTATTAAGCAAAATCCACGTT…
ASTF_00006388	XLOC_003464	829	135	0.7524	-0.362697	0.012984	4	0	0	GTGAATGTTCCCGCGCTCCTGATATTATTGTTTTTGTCGTGCTTATCAGCAAGCCCTACAAAGTCATCGACAGAGGAAATATCGACCGAACAAAATTTACCATGTTTAATGGAACTGCAAAAAATATTCGACAATATACTTTTTAAACTGTTTGTGCGATCTGTAGAGCCGTTTGATTTACCGCAAAAAATGGATCCCAACTCTGCATCAGATCGATATCAAACAAAGCAAAGCTCAGCTTCCGAATCATCGTCGGAATCGTTTGAGCATGTTCCGCACGAGATAGCGGAAGCAGTTATTGTACTTTTGGGAAGGTTGGATCTTTTGATGGAAAACCTTAACCGGACAATGTCCTCTTCGGCCTGTTTGAAGCATTATCAACGGAAGAATCCTCCAGCA…
ASTF_00006408	XLOC_003475	897	153	0.5794	-0.215234	0.0117532	2	0	0	GTGCCCGTACGCGCACAGGCAGGCGAGGGCATCGGGCAGCAGTTGTGCGCCAGGAAAAACCAATGCCAGTCCCAACCTCAGGTCCTACGATACTCGGTCGGTGTTGATGATGGACGCAATCGGTGGATCGTGTGTAGTTTTTTCTGTGTAAAGAGTGCAGAAGCGTGCCAGCCAGTATCCTGCGCTACAAATCCCTGGCAGTAGCGTGTTCCTGCGAGTGAAGGATGCATTTTGCACCACCAGCGTATGTGTGCGTATTTTAGTGTCGATAAACACGGCCCCGCAGAAGTGTTTCTATGCTGTAATTGTAGCAGCAGCAGCAGGCAAAGAAGTTGCTCGCGTATTGTGTGCTCTGTCGGCAGTAAGCGTGAAATACAAGCGAATCTCGTTTGGAAGATG…
ASTF_00006410	XLOC_003477	798	228	0.5881	-0.781393	0.00703839	1	0	0	GATTTGTGTTGTGAATATAAATTATACATACGCCATTCGCCTCTGCTTGTGGTGCATTTATTGTTCCGGCTTGGCTACGGCTGGTCTGCAAATTCGATGCAATAAAGGAAACCATTCCATTGCTTGAAGGATGTTAGAAAGTAGGGTTAGCTGACAGACCTTGTTCCTTTCATGCCGACTTCCAGACGGTGGTATAATTGCATACTAAAAAACACTTATATGTTTCCATTTCGAAGATTAATTAGAATACCTGATAAAAGAGAGACGAAACACACACACAGTAAACAGAAAAGCAAACACTCATAAAACCGTCAAAATGCGCCTGAGAAAGCGTGTCGCACCGATATGGATACGAGACGAAGATTGGAAGTTACTTAAATACAGTGAAGAAGAAACGAA…
ASTF_00006464	XLOC_003499	287	48	0.4096	0.238954	0.0185378	1	0	0	TGTGATATCAACATCCGCATCCTGACATCCTTTGGCAGGTGTCATACGGTGCGATACGAGTGCAGTGAAGTTCGATCCTCACAGATCATTTGTTGGCGACCTGGATCCTGACAGAGTGCGTTAAACGATCGCCAGTGGTGATCCCAATTCCTATTTCCGGGGAGGGCGTGGGGAAGGTGACCGAAACGCAGGGAGGACAGTAAGCGTTTCTTGGAGTCCAAGTTTGGGTGTCAGTGCGTGTGAAAATCGGAGTGAGTTTGGTGCGTTAAGCTTAAGTGCCGGCTGCT
ASTF_00006473	XLOC_003505	1177	282	0.8498	-0.169356	0.0599775	3	0	0	AAGAAAATTTTCAGATTGTTTAATGACTGGATTAGAACGTTTATTTATTGCAATATCCTTCGATGTTGTGAATTTCTTGAAAAAAAAAACGTCCATTTCAATCCTGCTTTGCCGGTTAACCCGGATAATCGAAACGCGTCTTATTCTTGTTCTTCTTTTTGTGCTATACTGTTGTTTTAGTTTTCCGTGGATTGACGAATTTTGCAAACAAACCCGTACGCCTTCTTTGTTTCTTTCAATGCTGTGATCGCGCCCGGCAGAATGGTATTTCTTTGGACCAGTGGAGGAAAGCCCATACACGTTAAAATAGTTCACAAATCGGACAGTGTACTGCAGCTCACGGTGGAAAATGTAGATGCACCTCGCGAAAGGCACACACTGCTGATTCTGGAGCTTGGG…
ASTF_00006474	XLOC_003506	479	138	1.0991	-0.481974	0.0440409	1	0	0	GTAACAAAATTACACTAGATAACAGATCAGACAGCTCAGCTTATAGGTAACGCGAGCACGGACGGAGTAACGCAAATTATCGCCAAATTTCCATAGCGACGTGCTAACTAACAATTAACCCCCAAACAGAATGCAAAAACAAACGCAGTAGACGCTAGCAAACTTGTTGACGTTTCTGTGAACCGGTGACAGCAAAAACACTTCCCCAAAGTGAACAACAGCATCATCATCATCGTCATCGTCATCCTTGTTTCCGGTATATCAAGTGCTTCGGGGCAAAATCATTACCACTAATGGAGATTTTAAGGACTAAGCGTAGAACAGGCAAACAGGCAACAAATCGAGGATAATGGGAGGGAGCAACAACTTTACAACTTGCAACTAAAGTCACCGATATCG…
ASTF_00006507	XLOC_003519	765	219	0.5862	-0.298917	0.0208817	2	0	0	GCTTCGTCGCAGCACACGATGCGCCATTCGCTAGGATAATACTCAATGGCAGGAACAGTTTGCTGCCTGGAGCTTAAATTCGCAAAACCAGTGAACCACCGGACAGCAGTGCAATACTTAAACCCAGTGCAAAACAACAACAAAACCCCGCAACCTCTCTAGCTTCAAGCAAATGCAAGCAGGTGGGCAAACCGGTCGCCCCCCATTACGCACGACATCCTCTTAACGTTGTATTACGTTTAGTGTATCACTAAGGAACACATTGCAAGATGGGGCTGACGGTTACGATCGCCACCGCGTTGAAATGGTCCTGCAAAGGGCAGCAGCAGGATCTCTTGTTTCTATCTGTTATCGATAACCTATTTTTACCTAACATTTTAAGCAAAGCGTCACACGAGA…
ASTF_00006512	XLOC_003520	747	192	1.101	-0.33872	0.0680479	1	0	0	TTTTAACCAGCTAATCAGATTTTCAGTTGTCGCTTCATTCGATAGTCATTTTTCGGTTTTGACCCATACTTCCAGTACACGCTCATCTAGCTATTAATCTCCTATTGTTTTGCTTCTTTTTCAACCGATTTTGGGTTGTGTCTCGCCTCATATATGTGTGTTCATGTGTTTTGCATCCCATCATCATCATCATCATCATGATCATCGTCATCGGTGTGTTTTCGCTGTTTTGAAGAACATTTCGATCCGCTTTTCGAATTATTACGCTTCCCATAGCCCATATTCACAGATAATGGTAGCATTAATAATGGTGGTGGTGGTGGTCCGCTTGGCTCGAGAACGAACGTCGCCGCCGCTGCCGCTGCCGGTGGTTGTTGTTGTTTAAATATTATAGAGATT…
ASTF_00006527	XLOC_003526	491	150	0.488	-0.131939	0.0182291	3	0	0	CGAAAATGTGTTAACCAAGTGTCGCCGCATACAATGCCCCCAGAGTCTTAGCAATACTTAGTGCTTTGGTGTAACTGCTAACAACACCCCAAAAGTTTTCCCCCGACGGGAGCTCAAGTGCAGAAGGTTAAGTGGAGATCTAATGTTTGGCTGGTGAAATAATCCTGTACCGTGATCCTAACATAATGTGACACAGTGTCTGCTGTGGAGCTGAAAAACTAGGGCTGAAGTATCGTGCGAAGCTGGCAGGAAGTTCACCGCAATCCGGAGCAAGAGTTTCGAGCTGCATTTTAGTCAAAGCCAAATCACGTTACATCGGTCTGTCTGCTCCAATTCTCGAGCCACTTTCGCAAAACCCCTTTTGACGAATGACGAAGCGTTAGAGATGGATCGTCGACA…
ASTF_00006533	XLOC_003529	798	219	0.6301	-0.0905392	0.0366952	1	0	0	GGGAGCTCGGAAGTACGCTGCGTTTTTTCTCTTGTTGGCGATCGATCGATCGATCGATGTGATTGCATCTCAACGCCTGCTGGGTGAGTGTGTGTGTGTGCGCGTGAGACGATTGATTGATGGATGTTAGAACGTCAGCTTGGCCGTGTTTATTGTGCGTAAGCTTGCTGTGTATGCGTAAGTGAGAATCTAACAGGGGCGTGTGCGCCTGTGTGTGCGTTTATGTGCAATCGAGAGTTGGGCCGCAGAGTTGGGAAGGTGTTAGATTTTACTGTTACAAACGAAATATATCAGCCCCCCTCGACTTGAACTGATAAGATATGGCAGCCTATCCTGGGCACGCTATCACTCGCGGCCGTAGCTCGAGGTAGACGTGGGGACGAACCGTGGTCCACAACA…
ASTF_00006547	XLOC_003537	711	309	0.6244	-0.116369	0.0807177	2	0	0	GACGCACGCGCGCGCGCTCTCGATCGTACACCGTTCAGGGCAGGCTGGCAGGCAGACCGAACCGAACGGCTGGAAACAAACAAGCTTTGGCTTCGCGGCAAACACCACGTTCGAAACCGCGTACCGGGGTTTCCGTCGTTTTGCGTGCGTCCGTGCGTGCGTGCGTACAAGGCAAGATTCGCGAGTGCGAACGTGTTACAGAGTGTGGAAGACGCGAGCAAGAAAAGAAAAAGTTCAAACCGGCTACCACTACGCCGGGTGGGAGAACAAAAGACGACGACGACGACGACGGTTTTGTGGTTTTTCTCCATCGTGCTTTTAGTCTGCAGCACCTACTATTCTACTTCATCAGCAACATTCTCCACCATCCCAGCAAGAAATCAATAGTTTGTGCAAAAA…
ASTF_00006560	XLOC_003543	369	105	1.0475	0.383816	0.209911	2	0	0	CTGTGTGTGTACGGGGTTGCTTAAATAACCTACTTCGACGGGCAGCGACGCTCTAATTGATAGCGATGGAACTGCTCGTTTCGCCGGATGCTGCGCGGAACATTGCGGCCGGAGTGTTGGATCAGGAAAGCCATCAAGGTGGCATTATAAATCCTGCTTCGACGATTGACCTAGAGCAGGAACTGGTTGAGAATGGTGGTGTGATTTGTGACATTGCTAAAATACCGCGAGTCCCCGGCGATGGTGCCCATGCTCCGGATGACGAGAATACCGACGACCGATCATCACGACCAACTGCAACTGCAACCACCACCACGGGCGAAAGAGGCGATCTGCTGCGGACACTCTCTCTGGCGGGATGTGAAGTGG
ASTF_00006570	XLOC_003549	661	105	0.5041	-0.799196	0.00213889	1	0	0	AAAAGATGTTAGAAAATGCAAACCATAACATACTAATTGTAAGATTCGGCTTGTGTAAGTGTATGTGTGTTTGCGTGTTTTGGGACGAACTATTTGCGCGAACGAGTTAGCGAACGTTTAGATAAGATTAATTCACCGTAAACCGTTTGTCAAATCAAATAATTGCAACTAAAAACAAACAAACAAACAAATCCGTATTGTAACACAGTCAGGATAATGATTGTTGGAGTGTTGTGCTTGTACATAACCTGGCGCAGGTGCGGCAGTACTGTAGTGAAGTACTAATAGCATAATCGTAGCTGTGGAATGGGGAGCCATGAAATAAATCAAACTACATCATCAGTACCGTCTAACACACCTTAAAAACGAGAAGCTTTTCTTTGTGTTCTTATACTAAAC…
ASTF_00006572	XLOC_003551	1482	219	0.6175	-0.570447	0.00465576	1	0	0	AAAGCACATAAAAATAGTTATAAATTTTCCAAAATTTTAGCAAAACAAAACTGAGGCAAAAGTAAAGAGTGAAAGTGGGTAGAGTGGTGAGGCAAGCCGAGAGAAAAAAAGACGTACACAGTGAGCTCTGGTGCATTGAACACTTCAAGATGTTTAAAATCTCAAAAGCTTTGCTAGTTTAAAAAGCTTCATCACAAGAAAGTAAGAAACAAACAACAACAAAAAAAACGGCTAGAATATAACTATTCATATTATTAACGATAAAAGAGAGAAAACCCACATTGTGCATCCAAGAGGACGGAACGAGGGAAAGCGTTAAAAATGCGTTACAAATTCTCCGCTATAAGCTCATAAGAAATAGCTCATATTCGAAGTGCGTGCGAAAACAAAACCAACAAC…
ASTF_00006575	XLOC_003554	455	141	0.9499	-0.0937204	0.0727203	1	0	0	AATCAATGCTTTGTTTCGGTCCAATGCTCAGTCCATACAATTATCCCAGCTAAACAGTACCCACATTAATGTTGAGTGTTTTGGCTCCATTCTACAACTCTTCTCGGTCAGCGTTTGACGCCTTGCGTTCAGCATCAACCACCCATCCGTCCATCCATCCATCCACCCACCCAGCAAAACGCAATTGTGCATCGCTGTCAGTGCGATAATTGTAGCACACATTTCGCGGGTTCAACCAGTGCGGTCATAAATTGGGTCGGTGTACCTCGGTGCACCGATTGAGCAGCGAGCCCACGGAAAGATGCAAACAATGGTGAAGATGAGGTGATGAGCTTACGTGAAACGAAAGAAAGCAAACCGTAGCGCTTCTCTATCCGGTCCGAGACAAACAGAATTAGC…
ASTF_00006582	XLOC_003561	463	237	0.907	-0.482362	0.0597527	1	0	0	TCACACACAAACTCCTTCATAGCGCCACAACATAGCGTGTGCATTTTACATTGCTTTCGTAGAAGCTTCTCAGTGAAGCGGTACCGTTGCAAGAAAAAAACAAGAGCCATTGTAAATTTTCTCGAAAATCGATTAGCAATCGATATTTACTTTTATCACTCTTTTGAAAAATTCTATAACTTTACGCCGTATGTTTTTGATTGCAGAAATTACAGAAAAAAATGAAAGAATAATACCAACTGTACAGCATTTAGGAAGAACCGATCCACAACGAGCATCATGCTTCTTAGCTGGCACACAGTTCCACGTAGCGAAAGCAGGGCGCGAACATAAATTGTGCAGTGGCAAAGTGAGCGATAAACAACCAATAATCTCAACCGATAAATTGCATGATATGAT…
ASTF_00006583	XLOC_003562	311	90	0.931	-0.0625742	0.0581412	1	0	0	TTTTTGTGTCGAAGTGTTGCGTGTGCATCCGTTGCGGCGATGCTGGTGACAGCCTCCATTCTTGCTAAGTATCGCATGCTTATGTTAATTTGCTCTCCAGGGGAAACTTTTAACTCGAGGAAGGATTAGAGATTTGATTTGAATAATTCATTCATTCAAGGATAACTTAAACTAAGACCTGTTCTTTCTGCTTAATCCCAGCTCCACAAGAACAAGATTCAAATGTTTGCAATCTGATCCATCAGTGTTCCAAATTCCAAACATTCACCACTAATCAATCAAATCCAAAACTGCACCAATCGAACGAATGC
ASTF_00006584	XLOC_003563	371	132	0.8377	-0.35333	0.0304147	1	0	0	TCTGTCGCGATGTTATGGGATGCGCAGACAGTGAACACGTGAAGGGAGTTATGCGCAATTTTTGTCTATGGCTTCGCACGTTGTACCAGCTCAGTGTAATAGGTTTAGGCGGAACATTATGTTGCTAGTGAATGTGGTGGAAAAATTCGCTAAAATCATTGTGAAGGGTTTGGGAAACTTAATTCACTTATGCTGCTAATCATGCAACTGCACGTTTGCTTTGGTAAATTTCATCGTAAGCATTTTCTTCTGAAGCTGTATTCCTGCACAAGTACAATAGGTTAACAAATGCTAATTTAATCATTTGTTTGCGTCATCACGTATACTTCCAAATACATGTGTAACAATTTCTCCAACGCGAACGATCGTTT
ASTF_00006586	XLOC_003565	3027	126	0.6873	-0.0296609	0.00113034	1	0	0	AGGGGTAAACACTCTTGGGAAAAGGGGTGTTAATAGATTAAAATTAGCGAGGGAAAACCAAACCAATAAGCAAATAAATCTTACGGGAAAAATAAGACGACGGGGGCCACGAAAAGTAGGGCCGAAAGCCACCACTCCCATCGCCATCGTTTATGCTGCGTCGGGACAGGCACACTTCTCTCACTGTCGTTCGTCGTACTACTACTTTTTTATGACAATCGTGAGCAAACTGATAAGCAAATGCATTCGATCGCAATTAAATGATTAAATTCTTGTGCACACACGCACACACACGTCACACTAACAACAACAACTAAAAACCCCAAAATCCGTCACAGAACAGTGTTTATCTGTCTATATGTTCTATATGTTTTGCTGTCTTTGGCTCAACATAAGAGG…
ASTF_00006589	XLOC_003568	380	273	0.6253	-0.462076	0.0422948	1	0	0	AAGTAGCATTATAACAGTGGATTTCATCTTGTTGTTACCGCAGAAAACATGCCACAAATGAAAGAAGTTTGAAAAACAAGGTGCAGAACAGGAGACGAAAATGAGACATTCAGACGTTTATCAAAGGAGGAAGAAACACGGCACGGGTTCGTTTCGAGTTGCTGTTCGTTACACACACACTTGTATTAGGTTCCAATGGTTTCGACTAAATGTTGCCACATTGCTAGTGCAAGTGCATAAATTACAGGTGAGTCCAAAGAAGCATTCGTTTAGTAGCATATTTTGCTCTAAATGGCTGAGTTGGGGCGTAATTGACATTTTTAAAGTAATAAGCCTAACGCTTAGCTCACAAATAGCTTCACAGATCACGTAGAATGAAC
ASTF_00006590	XLOC_003569	1202	171	0.9961	0.0234625	0.0534923	1	0	0	TACGCCCATTGATCCTTTTTTGCTTCTTTTTTCTACGTGTTGGTCCTGTGAAGCTCGGGAAACACGCAATCGATCGGGAAGCATATTTTTCGTTTTCATTTCATCCCTGTGACTCAATTTACCTGTTTCTATCCGGTGTTGCGTTGTTTGTATTCTCGGCTTGGTGTTCTATGCTGCAGGTTCAACTTGAGAAGGTTTTTGGGTGACTGTTTTTCTCTTTCTCTCTCTCTCTCTGCCTTGCTCTCTGTCGCTGTCGACTGCAACTTTCAATAGCGGCCTGCCTGGATGGAAATTTGTACGGGAAAGCAGCTCTAGCTGGCTCGACGTCGTCGTCGTAGTAGGCGCAGGTTGTGTTTCGTTACGCGGTTTTACGCTTTTGTGTACAACCGGGTCAAACAC…
ASTF_00006594	XLOC_003573	715	156	0.6557	-0.844611	0.00440126	1	0	0	TAGAATAATAAATAAATTTATGGTTATTAGTCGATGGTTTTGCCGTTTTCTTGATGTAAGCTTCACTGAACACCGCAGGAAACCAAACTTTTTTTTACCAAAATTTATAATTACACTATTCACAATCTTCACTTCAATTTCGGCACGTTTTTTGCTATTAGTACACTCGTTTTAGTACACTGCTTCCAGTGCGATCATCCGTCGACGGTTGCTGAGATCATACGATAGTAGTAATTTAAACAAACCACTAAGCAACTCACAAGGTTTTCTTTTCGATAGCAAGTGCACCAGACACACACACACACACACACACAGCTGGCCACTCAGATCAGCTTGCAAACTTCAAAACTAGCCAGCAAACTTGCTAACACTCACATTTCACATTACATTGCGAATTTT…
ASTF_00006620	XLOC_003591	573	111	0.605	-0.457636	0.00766711	1	0	0	TTGTCGGTCTTCGGCAGGACCGGGGTTCAAATCCCATCAAGATCCAGATTTAGTTTTACTGCTACTGAATTTTTTTATAAGCGTGTAACATTCCCTTTACCGACTAGTCGTATGCTGCTTTAAAGATCATTAATTTTAACCCCAAAATGAACACTAGGAATGAATTTGATTTAACGAAAATGAACGTTTCAGTGATTGGTAAAATCTGTCAACTGCTTCGCGATACCGGCTATTATTTAGACAAAATATTAATGTAAGCAAATAGACGGCAAATATCATTTTCCTTAACAGAAAACCCCTTCTTTTTTGGGTTTTTATAACGTGCATAAAAAAAAACCCGAACCGAACCCGGAGCCGGCTCGAATCATATTCAAATCCGAGTCTTTTCTGTTGGGACAA…
ASTF_00006642	XLOC_003607	294	147	1.2615	0.0513536	0.268942	2	0	0	CAAAAAAAAAACCAAATCTCTTGGGGCCGGTCCCAGGGCTGTGCAGCCGACGGTGTTCACCAATAGTGCGTCCAAAGGACACGCGGGCGCCGACGGTATCCTGACTGGCTTTTTACCGACATTATCGGTAAAGCAATAAAACTCCTGATGCTCGATGTCGTCGTCGTTAAGCGTAAAAAAAGAAAACAAGTACCCGTGCATAATGCAGAACTGCTCCAAATCCCTGGACAGGGTGCTGCCTGTGCGCTGGACAAACATCACGAACGTCAACTAAAGCGACTTTGCAACGCACAC
ASTF_00006643	XLOC_003608	852	306	0.8355	0.0635461	0.169057	3	0	0	CGGTGTGTGAGCGGAGCGCAGGATCCGCGTTGGTTGCGCTCCCTGTTTCGGGAAAGGCTCTATTTTCTTTCGAACAACTGATCTGCTGCCGAGCTAAAGTAATATGCTCGCTTTCTAGCAGGATACAAGCCGTTAGCATGTCAAAGCGAGCCAACGCGTTCAGTGCGAGCGAGAAAGCGAATGCAAGCGAATAAATCATCCGCGACGCAGAGAGCACACACACGCACACGCAAACAGCTAATCAGAATGTGTGCTCAACATTCGAGTACTTCCATGTTTCACAATTTTCTGAAAACCTAACCGAAATCCAGCAACAACGGCCAGCAAAAAAAAACCTCCCTTCACACCACCACCTCAGAGCAGCCCTTCAGACAACTCGCGTCGTGTGGCTGTGTGTGT…
ASTF_00006646	XLOC_003611	977	150	0.5864	-0.388395	0.00699627	1	0	0	AAAAAAAAAACCCTCGACAGAACCATCCTGTTTGTTTTTCCCCGCGAACGCTGTTTATTATGACGTTTCAATTTTGACAACGACCAGCGAACGGCCCAAAGCAAGGAAAACGGTTCGCCCCATGAAGCTATGCAGCCTCCGAGCGCGAATGCAAACCAAAGCCGAACGACATCTTTGGGACGTAGTCTGCGTTTTCTGTTAGTTAACTATTTCGTTTCAGTGCATCGTTTATCTGTTGTGCCGTTTGTGGGGAAGCTTTCGTTCCGTTTTCTTTCATAACAGTGCGTCCTGGTAGCAAGGGGCCGGTTGGTTTTATTCCTCCGCTCTGGAGCGACGACGCGCACCAAAACCTGGTGGTAAAAATAATTGTACGTTTACGCTGTTGAAAACTTTCGCGAA…
ASTF_00006685	XLOC_003632	1594	159	0.9192	-0.15206	0.0154579	2	0	0	GCTCAACAATAGCAACAAGTTATAAAAGAAAACGAAACAATCCGCGCAGTTTACTACCTCACACAAGCAACCAGATGCTCCCACTAATGACAGCTGTCAATGTGAAGCTGGGGACGCTTAGTGGTTCTTCGGTTCTTCGATTCCCGAGTCCGAGTGGAGGGCCAATCGAAGCAAAGAATTTGTTTCGAACCTATCCTCCCCCCAAAGAACACTCTCCTACAGATACCCACTGATGGGATAAGAGAACGAGTATAGCTATGGAGATGTAAAATTACTAGAGCTTAGCAAGAAAACTACAAAACTGGTCCAGTTTTTGATCCAGTGTGTGCGTGTGTGTGTGTGTGTATAAAATGGAATCGAAACACATAATACTTTTATGAAAAAAAAAACGCAAAAATC…
ASTF_00006697	XLOC_003637	414	48	0.7677	-0.339717	0.01166	1	0	0	AGGCTGCCGGAGTGCCAGTGTTGTATCCCTGTGAACAGTCAAGACACCAGTCGCCTGCCAGTTGTGTGCCAACGGTCAGTGGAACAACGACCATTGTCGCGTGTGCAGACCACCGTCAGCAATCAACTTCGATCAAACTCGAACGCTCCAAAATTTGCTTCAAATTTGCGTGTATCTGGGTGAAACTTGTGTGTTGTTTACAGTTTTCTGGCCCGGAAACGGTAGTTGAAGAGTGTTTGTGAGTGAGTAAGTGAGCGTATGCATGCACAAAATGCACGGCGATCATCGTGCAGAATGATCGAGTAGTGGGATGGTTTACGAAAGACAGCAGTACAAAAACGAACCACTTTGTGGTTAAACAGGACCAGGTGGCTAACTGACGACGCTCTCATTGTGATT…
ASTF_00006729	XLOC_003650	863	339	0.6597	-0.27303	0.066739	3	0	0	CGGCGAGACTGGATGACGTCGAAATTCATCTTTCCAGCGTCGGATGAGAGTTTGACCTTTCACTGCAAAAGCCCGGTAGCAAAATGTCGGAAGCTGGTGGAATGGCGTCGGTGGCATTAACCTCCCAGCAGCTAGCAGCAGTGAAGCTGCTGAGTGAGGAAAGGTTTAGTGCTTCATAAAAATCATCTGTGTGTGAGTGTGTAGAGTGCGTGAAGAGTGTGAGTGAAAATAATTAATTGGTTAGTAGTGTACGTCAAGCACCCAAAAAAGGGAGCAATCTGATAAGGATGAAGAAAATGAAGGATGCTACCGTATGGAGGAGCACGGCTTTCGGCAGGCTACCACCACACGCAAGAGCCGCTCTGTCCCTCCCTTCCCAAAGTCTGAGGACCTCATTAA…
ASTF_00006754	XLOC_003658	588	129	0.5781	-0.201126	0.0148125	1	0	0	CGCTTCAGGTTATAGTGCTCGAACCTTTGGGCGAAAAACTTACTCTAACGCCTCGCGTCCGTCTCCCAGCACTCGGTGTCGAAGAACAAAAACATAGAACAGCGCGAGCCAGCCAGCCAGCCAGCCAGCCAGTCAGCCAGCCAAACCAACAAACCAACTGGCACTGCGCGATGGCGAACAGTTGTGGAAATAATCTCTTTTAGGCGGAGGTTTGTTGCGAAAAACCATCAACCCCAGGCAGGCCAAAGCAAAAGGAAGCATCCGTCGTTCCGATTGTGCCACTCAGTAACGGGGTGTAAAACGGTGATGCAGACTGGCCTTCTTCCCCCCACCCTTCGCCCCCGTTGAATGACCATTTGGTGTAACAAGTAGTGAACGGTGCCGCTCCGAACGAACCAG…
ASTF_00006777	XLOC_003667	3443	210	0.5457	-0.0977842	0.000755302	1	0	0	CTGCTGCTCTCTGGAGGACGTGCTTGGCTTACCGCTGCCGGATGGACGTCTCAAGCTCGGACGGTACTGCGGACGCACCTGTGGACGCCGGTAAACGAAGAAACAGGCCCGAATCGGGGAATAGGGGTAGGGAGAAAGAGAGAACAGGGTTGTTGTGAATTAGCGAGACGCATTAAAAAGAGGCTTTGTATTATTAAAAAAAAAAAACAGTGAGCGCTAGTGTCATTATAGATGTAGATTGACAAATAGAGCAGTTGTACTAGGCTTTGGCGGTAAAATCAGTGTCGTGTCTCATCGGTGGTGTTGTGTAGCTGTTGCACAATGGTAGATTTACATTAGGGTTAGGACTCTTTTTTATCTAACTTCGGTACATTGTAATGTTCCAATTCTATTGTGTGT…
ASTF_00006800	XLOC_003679	803	144	0.8084	0.115232	0.0513027	2	0	0	GTGTCGAACGCCCTCCACCCCCCAGAAGAAAAAAGAAAAACATAGCAGCAGTACGACGGAGTGCTCCGAGAGAGGGAAAAAGGTTTAGCTCAACAGTGAGTGGAAAACAGATACACACAATTTTCTTTCGTGCCGTTTTTTTTTTTGTTGTTGGGGGGGTTTGAAAGTCCGGTAAAAGTGTGTGCGTGTTTCGCGATCTGTATTTATCGATGGTATGGGCGCCGTGTAGCTGAGCGTACCCGGAGAATCCGGTGTGCGCCCATCGCGTTTAGGGCCCCGGCGCCATGTTCAGCCGACGCAGAAACGATCACAGGATTCAACCAGTAAGGTGTTGCTAGCGAAACCTGGAAGGCTAAGAAGCAGGAAGAAGCAGGAGCAAGAAGTGTAAAGGGGGGAAAG…
ASTF_00006823	XLOC_003690	661	318	0.6245	0.070346	0.136672	2	0	0	TCTGGCGTACCAATCCATCTCGCTTACCCGATATATCGGTGGCAGGTTCGGCTGCTCGTGTCCGATTATTGCCGACGGTGCGTTCCTTTCTGCCCACCGCGTAATGTGTTTTCGATGTCACGCTTTTTCATCGTCGTAAGTACCCGGTCCCGTTCCAAATGGTCTGTCAGGTGACGGACGGATGAGGATCCTTCAAACGCATGCCCAGAAGTAAACAAAACAAACAAAACACAAATCAGAACTTAAGGAAGCCTAAACAGCTTTGAAGTGATCGATTTTTTAACATCACGGATAGGCAAACACCTTCACCGGCTCGCCGCAAAAGATTACCACCGGAGGTGCTCGGAAACTCTGGTCCGCGGTCCCGGGCTACGGTGAGCACGGTGCCGGGTCTAAACA…
ASTF_00006865	XLOC_003708	1708	213	0.6802	-0.709113	0.00283198	1	0	0	AGATTTTCCAATTATCCAACAAAAAAAATAATAAAAACGGGAATCGAATCATCCAATACAATCACAGTGCAATACAAATATAGACTAAATAATCCCTTTTGTGGCACCATTTAGAGGTCCATAATGTCGAGTGTTTTAGCGGCGAGCGAACGAGAACGCGAAAGCGGAATCGGGTATTGAAAAAAAAAGCCGTTGAACGTTTTTTGCTGCGTTTTGCGTCCCTTGCAGGCGTAGGGAACAGTAGAAAGCGCCGGCATGTATGCAATTTCACAGTAACACAGTTCGGTATTAGAGGCTTTTTCTTCTCTGTAGTAGCCGCTCTTTGGTTTAACTGATCTCTATTGCCCAGCTATGTATGTGTATGTGTGTGTGTGTGTTTTAAACAGCAAAAAAAGAAAG…
ASTF_00006866	XLOC_003709	677	303	0.7454	-0.385757	0.0620511	1	0	0	ATACTAAATTTCGTATCCTTCTTTATCTATGTCTTGTACTGTTTAACGCTTTATTATTTCAGTATCTTGTGTTAAAAAAATTGGATTACTATCAAACCCTTATTAAAAGAAAGAAATAGCAGTGAGTGTGTGTAATTTCGACTGCTTGTTTAATGCCCAGCTCGAGAACGAATTGGTAGATCCTATATATCACATGAACACAGCAACACTAGCTTATACCATTTAAAATTCTCTAAATGTAGACTGTAAAAAGGGATTCGCATTTATTACTGTCGTTTTTTTTTATGGTTCATGTTTGTCATGCGCACGTTAGATTCAATCATAACCAACTTAGTTTGCCAACATTTTGTGTGATTGTCTGCATACTTGCTGTTTAGAACTCCGTCTCCGTCTAAGTGT…
ASTF_00006867	XLOC_003710	834	240	0.8081	-0.748298	0.0154345	1	0	0	ATTACATGCATACATCTATGCGCAAAAAAGAGTGAGGTTGATTATCATCGGGGTTTGTTCATCTCTCCCGAATAACTAAAGCATACTTGCCATTTTCTTTCACGTCTCTCCAGCATCCTACCAATACATTCTTGCATGAAGTGGGTTCTATTTTCGGTTTAATCTCCGTCACATCGTCACGCCACGCAACTAAAAGCAATGCATGTGAATGTATTCCTTGTATGTTTACGCAAACTTTCACACACTCAGATAAGTTAATGAGCATATAAAGAAAATGGCTCCCCGAGCCCTTTTGTAAAGCCTACACATACCTACCTATATTCAATGCCATGTCAATGTCACCCCTTTATTGAACGTTATTATGTGTCTTCAAAAAATCAATTACCTATATCTTCGATT…
ASTF_00006881	XLOC_003716	446	81	0.728	-0.475629	0.00964391	2	0	0	GGGAAAGAGTTGTTGACTGTGAGAAGACAATTCCTCAATGTGCTCACAGAAAAATCGACGCTACCATCAGGATCCAGGAACACTATCTCGCAGCAACACACATAACATGGACCGGAGGAGCCAGACACCAGAGGGGTTTGATAAATTTACCTTGTTCAAACATTGACTCAACTTCTTAGCCTTTTCTCTCTCGACTGTACGGTACAAAAATAGCGTTCTACCAGAGCAGATTCCTCTACCAGATTGTATTAAAAAGCAACCAGTCGAGAGATCGGATTGGGCTTGTTTTTGGACCTTTGGTAAGATTAGGGCTAGTTATAGGAATAAGATAAATAGACTTCAGAATTCTTTGTAAAACTCATGTGGCTAACAAGATCTTTTTATACAAATACAAAAAAC…
ASTF_00006893	XLOC_003723	890	561	0.6171	-0.134585	0.37498	1	0	0	ACGCGGTTGTTCACACCAAACTAGTGTTTTCGGTTACAGATAGCACCGTGTAGCCGCGTGGCTCATCAACGGAGTGATGCGACGGGGAGGGTGTGTGGGTGGTTTTGGGGTAGGTGGATAGTGCGGAACCCAACCGAAACCCAAACGGATGCTTTCTTCCAGTTCCAGGCGTCTTTTGTTGTTGTTACCGTGTGGTGGTGTGGGTTGTGTTGTTCGGTACACTCATCATTCCGAACCCCGACACACACACGCACGCAAACCGATCTATATAGCAAGAGGCGCCCCAAAAAACGCATCCGTACGCGTGAAAAAGGGTGATGACCACCGCACGACCTGCGGAAGTTCCCCGGTGGGGTGGAGATCGGGTGGGTGGGTTGGTTGGGTTTTGCCCTGGGTTGA…
ASTF_00006894	XLOC_003724	898	129	0.7178	-0.103641	0.0185724	1	0	0	GTGGTGTGGTGTATAGCAAAACTTTATGCTATATACACATACGCAGACGCACACACACACACATGCGCGCTTTCGTTTGCCGTCTTTCTTTTGGTGTGCTCTTTTACGCTACCGTGCCTAATCGCCGCCGTGGTAAGCGCATGTGTGTACGGGCCCGGGTACACCGTCCAGGCATGTGTGTGGTGTTGTGAGCTTCTTGGAATGCTTTCTCTTCGTCGGGCAGACGTCGCTTCACCAGAACCAGCCCGATACGAACTCCGGTCTGATTGTTCTGCTAAAATTCATTCTGAGATTTAGGGTTCTCGGCCGCGGACAAAAGAGGTTGAACGGTGGGCCCCCGTTACCCTAGGTATCGTTCAGTTCCCCCATCATTATCATTCATAAAGCGTGTTAGATAGT…
ASTF_00006895	XLOC_003725	820	252	0.4774	-0.411823	0.0144449	1	0	0	ACAGTTGCAATACGCTACTACATTACCTTCCTAGGCTCTTGGGACGTAACCCCCCTGCACTCCCATCACTTTTCCCAGCGCACAACCCACACAAACCACCCGTTCATCGTTCAAAAATACGAATGGATGATGCGACAGAGGGAGCGAAAAATCGGGTAGAAGGAGGGGTTTTTTTGGCCCCCCTCCCGTCGGTGACCCATCCACACACACGCACGTTTCATTGTATAAGTAGTGATTTTAGTTTTTTTTAATTTAGTGGGTTTACCTAGAAGAGACTATAGCGCTATATTACATGCATGCATGTGAATAAATATATATATGCTTATGCATTATTACCACATACATATAATTTTTGTTTGCTTCTTGTTCTAAATACATATGCGTATTGTAAATAAATCA…
ASTF_00006896	XLOC_003726	494	72	1.2429	-0.392275	0.0456905	1	0	0	GCCGCTGTTGCACCCATATTACCAATTTAGTCTGGTGTTAAGTCAATTGTACTGTGTTTGAAGGATTCTAACTCTTCTATTTCTCAGGAGCGAATCAGAGTGTCAGCTAGAATTAAGTAGGAAAAAGCCTTCAAAACCGTTTCTTACTACTGTAAAAGCTTTCCTAGCTCTACCCAGCATAGGTCGAGTAGATTAGTTAGTTAGTTTGAAGAGTCCTCTTTTTGGCATAATGACTGGATGCGTCATGTTGGCCCTATGATGGCTTACTAGAGTATTTGATACCATATAGTTGGATAGTCAGTTCTTGATGCGGTGTATGGTCCTGCGGGGGAGGTATCGGAGTATAAGCAAACTAAACAGTTGCTTGGAGCCCTGAGGGGTATTTTCCTCAAAGCTGAT…
ASTF_00006897	XLOC_003727	561	87	1.1832	-0.20935	0.0605198	1	0	0	CCGTAACCGTGGTAGGTTATTAGAAGAGGCCAACCAAAAAACAACAAAAAAAGACATTACTACAAATTACCCGACAAACATCAGGTAGTGCTGGTAGTTTTTCGACGGTGTAAAACACATCTCACCAGCACCGTAATTTAATAGAATTACAATTAAAAGCAACAAACTTTGGACAAATGTTATCCAACTCGCATTAGGCCGGTTTGGATGCGATCGGCTGTGGTTGCGTGCTAGCTGCAAAACGTGAAAACTTCTCACAAGCAGTAATTAGACTACAATCGAACGGGGCCCCGTGCCAAACCACCGTCGGTGTGACGGTGTGAAGTCTGATGAGATGAGATGTGTTGTCTTCAGATTTGTGCAGCCATGCGTGCACCCCCCCCGATAGGTAGCGAACGC…
ASTF_00006898	XLOC_003728	686	261	0.7122	-0.103627	0.0737394	1	0	0	TTAAATTATTTATAAATTGAAAAAATCGCTCCCTCGCTTAAAGCTTCCAAAAGACTCTTAATCAATCCTGTCTGAACAACCCAACCCGGAAATGGTTGATGGACCGGTCACGATGGTAAAGCAAATATTGACAGGATCAAGCACGAAGTACACAGGTCGAGGCTGCTTCTTGGTCCTTTTTGTTTCCTCTGTTTCCTCGAAGCGATTGCATCAAGTCATCGTCACGTGGCCACCATTGTATCCTATTACGGAGAAGAATGCTTCACTACATACCGTGCGCTACTCCCTGATACACACAAGTTAAGCGTTCATGCAAAATTAATTGATTTCCTATGGCCCCACGACACACCGCCGTTCGCGAAGGCGGACCACCAAAAACGAGGGCGAAAAGAGACCCGA…
ASTF_00006899	XLOC_003729	575	126	0.9253	0.111367	0.0810402	1	0	0	GGATGCTTGATACGTTTTGAAGCCCTTAGACGAATGGGGCGCAGACCACCGGGCTTGGCTGGGTGGCTCCGGTGTTGTGGCAGAATGTGCTTCTTCTATTTGCAAATGTTTTGACTGCCCGCAATCCAAAAAAATCTTCGCAGTTGTACGCAGAATCTTCGTTACGCGCTGGAAGAAGCAACAAAGTATGTACTCATTCCTGACGACTTGAGGACTGCTGCTCTGACAAAAATTATCGCTTAAAATAAGCAAGACTCTAGAGTTCGGCATCGTCAGCAAGAAAGTGCGAGCAGAATTAAATGTTTCAGCAAGGGCAAACAAACCGCAGGACCACGGTATAAGGCTTTCCATCCCAAAGGTCTGCCACATGTTAGAAGGACTGCCATAGAACCCTCGCAA…
ASTF_00006901	XLOC_003731	376	126	0.9119	0.211575	0.1232	1	0	0	TTTTTTCGCTGGAAATACTGATGCAATTGCAGCCGGATATTTGAAGAGCTGCTTCCGGACGATCTGTTCGATCTGATTACTTAAGCCCGCCATCTTTCAATAGCAATGGGAGTCTCTTCACTAGGTCACCGCACGCTGGAGCACATTGTTTGGTCAACGCATTATCTGCAATGTTGCAGGAGGATGGAGCTGGAGACACCAGAGCTGAAGAATTCTAAGCACTACCGCTAGCACGACAAAGCGAAAACCCCCGTTGATGTCGGATCGCCGGTTTGGGGACGCTGACGCAAAACAAAACTCCCATCCTCGGATCCTCCCCTTCCGGTCTTCTGCCCAGCAATTCTCCGTCCAAAACGGTAATGGAGTGGTCCAAACA
ASTF_00006903	XLOC_003733	400	180	0.638	-1.05359	0.00481275	1	0	0	CGGACGCTGCTAATCCCCCTGCATCCATGTTGAAAAATGCTAGTTATATATTTGAAAATTTACAAATTACAGTTGTGTATTTCAAAGAATTAAATCGAAAAAGCATTGAAAAGAGCGAAAGTCGTAAAATAAAAAAAAACAAAACAAAACAAAATAAAATTATTACAAAATTTCATACGATTTATACCTATAACGGGGTAAGGTAAATTTAGTTTGCTTGCTTCGCTTTTGTTTGTTTGTTGTACCGCGTTGGGTATAGTGATGGATGATTTTGTTTTTGGTTTTAGTTTGGTTGGCAAAAGTGAAGTAAATAGTGGTTTGCATGGCAAAGTTAAAGCATTAGTGTGGGCTTTTTTTAATTTTTCTTTTTGGTTCAGCTTCATGATGACCGATTGTTAGG
ASTF_00006905	XLOC_003735	685	132	0.5924	-0.647983	0.00488376	1	0	0	AGGGTAGGGAAAAAGTTTTACGATAAATTATTCCTCCAACATAGCTGCTTTTTCTCGAGCGCAGCTGGAGAGAGTTATCGTTGATTCTTGTGCAGCGAATATTTTGTGTTCCTTTACTTTTATTGGAGGTACTGTCGGTGATGTCTAACTTCAGCTAGCTTTATATATATATACATTTTAAATATAATGTCAAAATCGCTCAACTGCGGTAGCATTTTGTGGCATAGTGGTAGCTCGTGGGACTACCTATTCCCATTCCCAACGTAAAGATTCTACTGGATGAGCTGATTTCAATCAGCTTCGGAGGTATCCAACATTTCCAGAGATGTCTAAGATCATCAATTACATGTTTGTCCCACCAAGTAGAGCTTTAAGGTATCAGCTAGAGTAGAGATGTGC…
ASTF_00006906	XLOC_003736	535	165	0.7126	-0.287467	0.0263472	1	0	0	CGATACAAGTCGTTCTCCTTCAATATATTCGACAGTTTATGCGATAGTGGCATTGGCCTTCATATGGTAGGACCAGTTATCTAGTTACAGATAAATCACGACCGGGAAATTAAAATACCCGAAGAAGAAGCTTTCAACCCATTACTTGCTTTGCTCAACATTGTTTCCTATTCTACTTCACTAAATGATTGCTGTCATAATTATACACCTATCTTACGAGGGTTCGAACTAACTGGAATATAAATGAATTTATAGCTGGAACAAAGATGCCTAAAATTATGCAATACGCATATCAAAATATTTCTCTTCTCTTAGCTGATATACTAACTGGGAAATGGATAACGATTCTGAGTACTTTCTATCATTAAAATATTCCGATCGTTCAATTGAAGTCCGGAT…
ASTF_00006907	XLOC_003737	1438	288	0.4853	-0.099883	0.0184022	1	0	0	TTGCTACAGCATCGAGAAGAGGTGACGGGCTGTGTACAGGATTGCTGGTACGTGATTTGCCGCTCTGCCGAGCACAAATCCAGGTCCTGGCACGGAATCCTGTGCCATCGACCAACCTGCAATTCTGATAAAAGGGAATGAGTGTATGGCAGGAAGGAGATGGGGTTCGAGAGCAGGGAGCAGGGTGTTGAGTCCCGGGTTCCAGCGAAAGGGTTGAAGAAATATTTGTTTAGCTTATTCTTAATTCCCAATACTGCGCGCTGCTCATCCCCTTTCTGCCCTCCTATACGCTACGAAGGGGAAAGGGGGAAGGGAAGGTGAGGAGAGATAGGGACGCAAAGGTGAAAGGGTGCTACATTTCACAGCAGTTTGCTTAATCAGTGAGCGCACTGTTGGCAG…
ASTF_00006908	XLOC_003738	849	84	1.0521	0.148033	0.0627601	1	0	0	GGGGGTAGCCAGTTGGATCGGGAGGGAGAATTGGCATACCGTATGCCGCTATGCCTTAAGGCTATTTGGGTGGGATTTGATTGATGCGGGGCGCGTTCGAGCGATACATTGTGCAACACTAATCCATAGAAGCTTGGAAGGGTTCTGCAGTGCAAATGCAGCTATTCAGTTCTGAAGGCGGATCCAAGATTGAAGGGTAGCAGGACGGCAATTCTTTCGGTTCTTTTTTTGTGGAGGTGCTCAGTTATGGAGACGCCTGGTGGATGACGAGAATACAACGTGATGGAGACGCCCGGTACTTTGTGATGGAGAAGCCTAGTATTTGATGATGGGGGCGCGTAGTGTTTGGTGATCAAGACGCCTAGTGATTTGCAATGGATAGGCCTAGTGGATTGTTAG…
ASTF_00006909	XLOC_003739	773	174	0.7856	0.113073	0.0638729	1	0	0	ACAAGCGGGAGGAAGGGAAGGAGAAGGGAACGATCATCGTTTCATCATGATTATGATGATATTTACCGTCACTATCATCGAGATGATTCATTACACAAGCTGCAGAAGCACAACCTGCAACCATTCCCAGTTGTGGAAACCGATGATGCGTGTGTGGAAAACCGGGCAAATCGTTTTTCCCATCGTTACGAACTGCAACCCAATGCATTAGCTTAGATTTGCGTACGCGGGAACCGTTCGCTAAGCAATTTCTGCATTACATAATACCCGATTGGCCACAGGCTTTGCGTAGGCTCGAGAATAATCGCCCTTCGCGAAACAGCACAACCCTTTTGTGTCGGTTTTGGTCGTTCGCTTCCTCTCGTTATCTCTCTCTCTCTCTCTCTCTCTCTCTCTCTT…
ASTF_00006910	XLOC_003740	877	165	0.7674	-0.929719	0.00437245	1	0	0	CCACAATCCTCAGAGTGCGTGTGTGTATGTGTGTGTTTGTGTACGTGTGTCAGATAGAACAGGCTATGAATGGAGGGAAAATCCACTAGGTTTTCCACAGTTTTGTGTGCCTCAAGCTATTGTGTGTGTGTTTTTCTTTTTGTGTTTGTGTCTGTGTGTGTATGTTCTTCTCGCTTAAAAATAGTTTCCATAGTTCCTTTTTGTTTTCCTCTCCCTCCCGTTCGCTGTCGATGAAGTTGTTTCTATTATCGATGCCGGCATTTAATGTTGCGCGCGCGATTAGTGATTTAAATTCCTAGCCACACGTGCTTGTCTAGGAGTTAGATTCGTTACACAGAACATTTTCTCCAATACAAACACTCATGCACACACAAACACACAAACAGCCATACCATTGCT…
ASTF_00006911	XLOC_003741	926	81	0.8259	0.263086	0.0377565	1	0	0	TCAATCAACGGTATACCGACACAAAACTGAACCGAATCAATCGAGCAATCCACCCGCTGTGGCCATATATCCACACACAAACACATTCACACACACACACACACACACATACACACACACATACACACACAAACACGCACGCAGAAGCCAACGGGGTGGCACATCCCAACAGCTCGCCAACTGTCAACGCCAAAGAGCAGTGTACGACGTGAAATTTGTCGAAAATAATTGTAACCAAGCCAGAAGCAGGCAACGGAGTGAGGTTAGCTTCGCCAGCGAGGTTTTCCGTGGTTGTGAAGAAAGGCAGCATGCCCCCGGACTTTGTGTCTCGGATCCCTGTGTAACCGTGTAGTTCGTAGCCTGCGTGCGTGAATCAGCACCGTCCAGCGGGCAGAGCGC…
ASTF_00006927	XLOC_003750	655	156	1.0944	-0.187279	0.0778155	1	0	0	CAGCACTCAAGCTTGCGCGTAGTTCGATGGTTTGTTCGATGGAAATTGTGTGAAAAACGGGTTTTCCCTCCAACTATTATCGAAGAGGCGTGTATTTACAGGGATGTGAATGTGTTTGTGTGTATGGAATTTTACAGTGATGCGCTCATAGTTTGTGCAGATCGGTCAGTGTGTAGTGTGTGTATGAGTTTGTGTGTTTAATGCTTGCGCTTTCCGAGTCGTACGGGGTAATGTTCATAGGCGTAGTTCAGAAATGTTCGATGAAAAATGCCGATGAGGTTACTTCGATTATCCCCCGAATGATGATGCCACCAGAGAGCGGAACAATTTCCTAGCAGTTCGGTCCGGAATGTAATCTTTTCTCTGACCAAAGGTCTGACGGTTGGTAAGAGGTGTTGT…
ASTF_00006940	XLOC_003755	2962	285	0.7417	0.0202517	0.00662969	4	0	0	GGATACGCATCCGCCGACGGTCGATGCAACTAAGCTGTTGCAGCGATAGGAATCGTCGTGAAGCGACTACAAGGATTAGAGCTATCGATGTGCGCAATGCGCTCTGCGCACGGTAACATACACTTATGCGGAACGCTACCGATTCCGTCAACCGTGAATCGATCGAAAAGGAAGCTGTGGCAAAGAGGATCAAATAGATTATTGGCAAATGGACGTCACCTCTTCCCCACCAGACCGCGCTGTAGTTTCGAGGTGTGACGGTATAAGCTTTTTAAAAAACCCTATTCAATCCGGTTGCCGGTGGTGGATTGCACATTATGCTTAATAATCATCGACTTGCCATACGTGCGTGCGCTGGAGCCGAAAAGCAACGCGCTGGACGTGCAGAGCTTTCCTTGT…
ASTF_00006953	XLOC_003766	765	150	0.7251	-0.726979	0.0063307	1	0	0	CCCTGTATTCTACGTGAGGAGAAAAAAAAACTCAAAAAATCAGAAGAAACGAAGCTTATCGGACGGTGGGTTTAAAGCCCTCGTTAGCAAAACCAAGCAACGATATCAAATAGTGTCTAATTGTTGATCTAGATGTATAATTTGTAAGAATGTAGCACCGTCTAGCCGGAGTGCCAGCTGTAAACCGGGACAGTTTCCTTAAATGGATGTAGCTATCGAAACGTAAAAAAACGAATGTTACAGTTGAAAATACATAATCAAAAACCAAGAGAATATGAGCTTTTGTTAACATTTGGTGATGTGCTGTTATGTTCTACAGTTTTTGTTAAATTTCTCGTCAAGCTTCAATATTTGTAAAAAAATACCAAAATGCGTTATTACTTTCTATTAGTAGATCGT…
ASTF_00006958	XLOC_003768	425	198	0.7885	-0.203925	0.0603899	2	0	0	TCGCTGGTGCTGCTGACATCCGACGTGTGCCGTGAATGCAGTGCGGTTTTCCAGCATCAGTCTTCTTTGCATTTTCCCCGAAGGGACTGGGCCGTCAAGTGCAAACGTGATTTGTTGTTCCGTTCCGTGGGCTGTCCTGTGAGAAGAAATTGTGCTTGCTTTCAATATACACACATCTGGTTTTTGTGTGTCTGAGGGAGGGCGCATTCGCGTGTGTGTTTGTGTATGAGTATTTCTCGACGCCCGAAAATCATTGCCTGCTGCAATCGTGGTGCCGGCAACAAGAAGAAGAAGCAAAGCAGCCCGGCTACGGAAGTGCTAAAAATAAATTTCAAACCAAAGAAAACAAAAAGTCACACACACACACGAATTAATTTTCCATCCCCCCTCCCCGCCTTA…
ASTF_00006987	XLOC_003785	1033	81	1.0684	-0.0563544	0.0318703	2	0	0	CGGCCCGGAAGGATCGTCCTTTAGCCTTTCCGGCAGATCAACCCTGCTGTTCGATGTTTGCCAGTGGAGCCGCACCGTTCGCTGGATGCTGCTGAGCGTTCGGGCACGATCGTAGGCCTCGCGAAATCCCCGTGTCCTGTACTCACCCGGTGCGTGCCTGAGCGTTCGGGGGCAGCCAACACCTGCGAATGCGGGGCACGTTGGCCTTGCCAAGGTTGTTACCCGTGGTCCGTTTCGGGTGCACCGAGCAGTTGTAATAGAGCGCTACGACAAAAAAAAAGTGAAGCGATCACAGAGAAGTAGACGAGCGGAGTGTCAGTGTTTTGTCGGTGGAAAACGGAAAGATTTCGCCCAAGATCATCAACGCCAAGATCCAAGATCGGTGAATGATCTTGTTGC…
ASTF_00007001	XLOC_003794	2654	342	0.9631	0.344389	0.0653584	2	0	0	CAGCGACCCCATCCTTGTTTTACAGCTACAGCCAGCGCGTGCGTGAGTGTGGCATCAATACTTCGTACGCATCCGTTTTGTGCTGCTTAAGTGAGTGATTGACAGTGTTTCGGTGCTTCACGTTTCTGTTCAGTTTGTAGTGCATATTGCCTAACATTCAGGCGCAATCGTTTCGAACAGACTCTCTAAGCTGCGTTTCTAGTGATTTTAGTTCACCGATGGATACTTCCGTGATTACCTATGATGCTCCTAGCATGCAGCCACCAATCATCGACGTGTGCTAGTACCAGCGTCCCTAACGCCCAGCTTTTCTGAGGCCCAGCTTAAACCAGGAAGGTGTAATACCGAGCTCGATGGTGCGTGTCGCGTACTGACGGATCCGTCATCGTCGTCGTGTGG…
ASTF_00007023	XLOC_003806	2148	216	0.5827	-0.390867	0.00254891	1	0	0	CCCTAGAGAGAGAGAGAGAGAGGAAGAGCATTACAGAACGAATGTGTAGAAATCTTAGGGAAAACTCTATTCAACTCTATTGCCATTTTTCGCAACGCCAGAAAACCAAACATTCGCTTCGGCTGTAGACACACACAGAAACAGAGAAAAAAGAGGAGGAAGGGGGGGGTGAAGAAGCATTGTGTCCATGTTTGTAGTACTTTTTCCCCGTACAATATTCTCTAGTAGAAGGAGCGAGTGAAAAGCAGAAGAAACACACAATTTGTGGAGGAAAACATACAGTAGAATAACCAAACGAGCGAGAAGAATAGCTTCTTCATCGATTTACCGATTTATCTCATAACAGTTTTTCTTTTCTTAACAACCCCCCCCATACATACACACATAGTCCTTGCTCTA…
ASTF_00007096	XLOC_003833	4679	855	0.508	-0.159268	0.0319508	1	0	0	ACACATTCACGAGAAACATTTTCATCACATTTTTTGGTCGCACAAGCAACACAAAAACACAGCCCACAACACGAAGAAACACCCACCCAGAGTTCCAGAGAGGCTGGAAGTATCGCTGGTGGTGGAACTCTCACACAGGCCACACACCGGATGTGGACAGAGGTATAGTTGGTATGGTCTCCCCCGGAGTGGTCTCCATCATGTTCCGAGTTGTACGGGGGCGGCAAACAAGGTTTTGAGGTCATTGGACCTCCGAAAAGCAGCATACCATAGGGAAGAATAATAATACAACGAGACACCATCCCATCGAGTCGCGAGTGGAGTCCAAGAGTGTCCATCCGTGTCCACATCCACATCTTTGGGCCGAACATTGGTGAGTTCTCGTTGAACTACACAGAT…
ASTF_00007100	XLOC_003837	313	84	1.2176	-0.0424089	0.12609	1	0	0	ACACTGTGAAGCACTCGGCGTTACTCGCCAAACAGAGACTGGCGAGCACTTGTATATTTTCACAACAAGATATCAATTTTCTATCCACTTCCGCGCGTTCCACGCTTATCGCACGCTATCTTTAGACGGGTGAAAATTTTTTTTTCCACCGTCCTTTTTTCCCTCACTCACGCATACACACACACACTGCTAACACAAGAACTTTACCAGCTCGGGCGGGAAAACCGATGCGCGGCAAAGATGATCTTTCCAAATTCGTTGTTTATTTTTCCGGTCCGCACTGGTGCTGCTGTTGCTGCGAATCGGCTGGTGG
ASTF_00007101	XLOC_003838	983	180	0.872	-0.491421	0.0164949	1	0	0	CCATTCACTTTAGCTGCTGGCAGATCGGAAAGCTTTTATCCTTATTATGCATCCTGTTTCACCCGCGTGTCACACACACACACCTACCATTCACCATCATCACCACCATCACCGCCCTCCCGGCGAGAATGGGCACTTCCGGCGTTTCCGGTTGTTAGAAATGCTTGCCAGAAGCTCATATGCGAAGACACCACACACAAAGGGAGAGTGAGAGCGAGACACACTTGTACATTCACTTAAACCCACATATGTGCATTCGGTGGACACAGAGATACTTTTCTCACCTCACACCCAATCCCCGGCGCACACACAGACACACAAGCACGCACACACTTACTCTGTTTTGGCTTCCGTTTTAGCTCGCTTGGCGCATTCTCAGCTTCACGTGGTTTGGCAAAA…
ASTF_00007102	XLOC_003839	1596	234	0.4614	-0.29304	0.00550666	1	0	0	TTTAACTTTTCTTTTATTAATCTTCATTTCGCACCAATCGGAACGCATCGAGCATTCATTCGCCAGGTTTTTTCCCAAATCCGTGTACCTTCACTTTCCACCACAGGGGCCTAAGGGTTGGGCTGTCCTGCCCAAGCTTCCTTTGCTTCCGATTACCGATCGCGCGTCTACAGCTCCATTCCACACCGTCCTAGCACTGTGTCTGTGTTCCCAACGACCTTCCTATGTCACTCTCTCTCTCTCTTGCTCTCTCTGTAAGTGTTTCTCCGTGTGTGTGTGTGCTGGGTTGAGCAAACAGGTATCAATATAACTTACACTAATTACACAGATGGATTTTTTTGGTTGTTGGTATGAGCTACGCGTGTCGTTTCGGTTTCGGTGTTAGTGTCGATCAGACTC…
ASTF_00007103	XLOC_003840	807	225	0.7555	-0.144476	0.0483591	1	0	0	CACAGTCAACGAAAAACATGCAAAATGAAACCACTCCGACCAACGTTTGCCACCGACCCTTTTCCCGTCGAAGGTATGATTAAATACAGCCAGTGCAGTTGCCGATGCACATAATTACACATTGAGCAGCATCACTCTACCGGAAGGTAAAGACCGCCCCCACTCTGCTTCCACTGTCTCTTGGCTTGTTGTCTCTTCACTGTTCACTTCTCGTCCTCCTCCTCCTCCTCCTCCTGTAGGCTAACCTTGAGCATATCAAACCATGCCGAAGCACCACGGTGCGCCCCATCATCCTTCCAAGAGCGTGCACACCGGTACAATCGTTTGACAGCTGAAGTGGTTCCAACAAAAGCGCAACGCCCGGTACACACACACACACACACAAACACAGCGGAAGCG…
ASTF_00007104	XLOC_003841	2271	312	0.5944	-0.23622	0.00749803	1	0	0	AATCGTGGAGTTAGCGGAAGTGACTGCATGAGAACCACCGACCGACGCTCGCTATATCTCCCGTGTGTCTCGTTAGCTGCAACCAGAGGGAGACGATGAAGTGGACATAGAACTGGGCCAAACTATTGCTTCCCTCCCCCCTCTTCAAAAACCCTCCCACCTTCGTTAGGGAGTCACAAGATGACAGAGACGTCATTAATGCCGTTGTAACGTTGGCATCCTTCACCTAGATTCACGTGCGCGTTCAACGTGCTCCAACGTCGGGATTCGTTCGATAACACCACCAACCCAACCGAGGAACGGAAGTCAGGCTTTATCAACATCGACAAACCAGCCCACCGCCCACCGCCGACAGCAAAAAGGGAAAAGGGGTTTTGCCAAGTTTTCCACCACTCACTC…
ASTF_00007105	XLOC_003842	409	132	0.7297	-0.0450902	0.0428423	1	0	0	TCCAGTCCGGTTTGGTGTGGTGTCCCGTCGGTAGTGGTGGTCCCGTCCCGTAGTGGTACACGATCGTCCGTAGTTACCGCGCATGGTGCGTGTACGTGCGCCACCCTGCAAAAGCCGCGATTTGTGCCGTAGTCGTCCTTGCTACCTTTTCCAAGTGCCAGTGCTAGAACGTGTGGAGCTCAGCACACAGACGGTGTGTCGGGCGAGTTTTTGAGTTGTTTGACGTCTCGGAAAACCAGCACTGCACTGCGGGTAGTTCCAACCAACCAACCAACACACGGTAGACGGCTTGTATGTAGGCCAGGTCACCGGAACCAGCACCAGAACGAGCACGTGTGTTTTCATCGCAAGTGATCCTAGTAGCCTGACGTTCTTCGTCAGCGATAGAGAGAGAGAGTG…
ASTF_00007107	XLOC_003844	735	138	0.7552	-0.395052	0.0141224	1	0	0	GTGAAAAGCGAGCAAAACAAAGCATCAGTTCTGCTGTTATTATCCAGCAGAACCGCACATACACACACACACGCATGCGGTACGGTGCAGTGCTGTGTGGTGGAGTGTGTTGTTTTCGTCAAGGCAGAACCGCGAGACGTGTCTGTGGCGAAGATTCTCCTTCCTGGAACCGAAATAACATCCACCTCTGAAGGCCAAATGTTATTTTCTCTGCCCCACCATACCAGCCGCGTTCGTTCGATGTGTTCGATGTGGCCCTAGATGGCAATGCGAAGAAGGGTCCGAATTTGGCGTTAAATAACAATCGAAGATAGCGGGATATGGAGATGGAAACGAATGTACGGTAGATGTAGAGAGAAGCACACATTTGGGGTGTTAATTTTGATGGATCAGGCAAAA…
ASTF_00007108	XLOC_003845	401	75	0.5299	0.148406	0.023225	1	0	0	GAAGCTGTAAGGGAATGGAACGGACTCTTTTAGCAGAACAAACCCGCTAAACGGCCGCTTATAGTCCTTCAATAACGATCGCTTCAAAAACAACCTTCCAACATCTTTACATAAATCCAGGAAACAATTCCTTCCATCGGCCCTCATGTGGACACTAATCGCTCATGGACACATTTTCCCGCTCACCTCACGCGCTGAGCGCAACACGCTGACTTACTGACTTACTTCATTCCATTTTCTCAACGCCCGGTACCGGGAAAGCGAGTTTTCCTTCCACTACCCTGCGAACCAGTTTCCATACTCCCCTGACGTAACGCAACGGGGCCGGTTTGCCGACATCTTCCGGATTGCACACGCCAGCTACCAGCTTCCACTTTCGGTTACATTTCGCACTAGTAG…
ASTF_00007109	XLOC_003846	590	138	0.629	-0.181127	0.0194375	1	0	0	CGATAAGGAAGTGAGTGAGATGGTCGACCGGATGATGATAAATGAGCTTGATTGATTGGTTTAGGCGGCGATGCGGTAGGAAATGCGGTGCTAAATACGGTACGAAGAATGGGGGTCGTGTCGATGTACCGGCGTGTTCCGGCGCACTACACAATGGCAAACAACAAGTGCACCGGTAATTGTGCTGTGCGCGCGGCCAGCTTTCCTTAAGCCCTGCCAAGTGACATAAGTGAGCGCCAATCGCGGCGTGTTGCGCAATCACGAGGAAGACCGGCAATGAAACATAAATTTATGATTCAATTTTGTTTGCCCACCTTCCCCAACAACATGCCCGCATGCAACAACCGCCCAGGTTCTCATTATTCGATCCTCGCCCATCCATGTTGAATACCTTTTTCT…
ASTF_00007110	XLOC_003847	386	117	0.7892	-0.576928	0.01353	1	0	0	GAGCCGCCACTGTTTTCGGGAGGATAATTCAACCGATAAGGACCTGTCACGCATCGGAAGATGGGCGGCAGTTTAATGGGCTTAGCAAGTGTGTTCACATATTTTTCAAAATTGTTTCAAACGTCACCCGTAACACCGGCAACACCTGTAACGCACACACGATTTGCATACCTTTGAGCTGCTACCAAAGCGTCGTCGTCATCGGTACAAACCAACTCCCGTACAAACCATTCGAGCAAACGTAACACACCGTTCACCTGTTTCACTGGTTAAGAATGACACGGAACAGCTGGTCGGAGAACAAATACCGCCGTTGGAAAACTTTACGCGTACTTCTTCAGCCAACGAAACGCAAACGGATCCCGCGCACTAGCTGTGGGACACGG
ASTF_00007111	XLOC_003848	781	144	0.6852	0.253426	0.0507445	1	0	0	TTGTTGACTGACTACTGCTAATTATAAATGGGTACTTCTTCCAATTATAACTGCCGGTAGTTCGTAGTTTACTGCTCCCCCAGCAGAGATAACGCTTCCCGGCGCAGGAAGCTTTGCGTTCACTCGTCCATTCGTCGGCTACATGTGAGAAGCACGTGAGTGTTCTGGCTGCTGGCGATGCTCTCACACGCATCAGTGTCTAATCCACCGCTCGTACATCCTACAATCCCCACCATGTCTAATGCTTAACGCTCGGAACGCCAAGCGGACGGGTACCGGTGGTGTCATTCGGGTGTTACTTATTTTCATCTCCACTTCGGATTTCTTCCACCGTAACGCCGTCATGTGAAGAAGGCAGCATACGGTGGTGGTAACCCCACGCAACTTCGCAAAACGCTG…
ASTF_00007112	XLOC_003849	1331	210	0.4701	-0.502823	0.00398438	1	0	0	TCTTTATGGGTTTGAGCAACGGTTTTTGTTGCTTTTGATGATAATTTTATATTAATTTTGATACACATTTTTTACTTCTTTTTTTTTGTTTTTGGCCACAAGCGTGCTTCGGGATACATATTTTTGTAAGGAGGAAACCCCACTTCACACCAAGAGACTGTAACGGTACGATTTGTCACGTACTCAAGAGCCGAATATTCAAAATCCGCGGTAAAAGAATTGCTTTTTTGCAGGATCTTGCGTCATTTAATATACACTTTGAACGCAAAAAATAAGATCATACTTCCAGTAATAAGGATCACGCACGCAAAACTCCAATTCTGCTTAGCTTCAGCAGTAGCAGCCGTTTGAGGTTCCCTAAAAGCCTTCCCCAATGGCGCAACGTAAAACCGTAGATTA…
ASTF_00007115	XLOC_003852	1878	327	0.5945	-0.436562	0.00904551	1	0	0	GCACCCGCTCCCGCGGGACGCTTCCAAACTCGGCAGGAGGCCTCGGGACCAGCAAATCGCTTTTCTATCGTCACAAAAGCATTCCTCCAAATCAATCCATCCACCAGGGTATTCGTGTTGGGAATCGGAATTGAATGCTTCGAAAACGAACCGGCCCAGAACAGAATTCATGAATTTGTACTTAATCTCTTCCAGCAGCAGCAGCAGCAGCACCAGGCTTGGACAGTGTAAAGCTATGTGGCACGGCACGCGATGGCACGCGGGCACTGAGCGCGAACTGATAAGGCCGCTGACTGACTGTCGGGCATGCTGATGGCAAGGCGCTGGGATTCTGTTTGCGCTATGCCGATGTGTGTGCAGGCTTCCACAAACCGTCGGGCTTGATAAGGTTGACAAGAT…
ASTF_00007145	XLOC_003874	177	120	1.1416	0.330355	0.314578	1	0	0	CGGACCCATTCGCCGCAGCCAGTTGTTGCCAAAACATAAACAGAACGCCGTAACCATGGACCACAAGAAACGTTTTCCGGGGCTAATAGAGCACAACAAATTCTCACCGTTGAAGATACTGGACGTACGATCGATAAACGAGCACGATCCCACATCCAGCTACAACAGCCTGCAGCA
ASTF_00007197	XLOC_003903	351	72	1.1885	-0.464141	0.0399693	2	0	0	GCGGCAGGTCTTGGCGCGAACGGTTGTGCTGCTGCTATTTTCCGGACGACGGCAACGTCTTCACGTCTCATTTCGTGATGGCGCTTTAGTGATAACGTGCAAGAATTAAAAGAGTGTGTTGGGGAATAGTTGTGTCAATTGTGTAAGGATAATTATGCGTCCAGTGCAGCAGTAGCAGCAGTATACAGAGGTGTGTAAATGCGTGTGAGCCACCGTGTGCGTGTATGTGAAAGTGCTACAAACCGTGTTCGGCATATTACCAGCAACTAATCAAGCACGTGTATTTGTCCGTATCGATGAGTGTATGTACCCCCCGTGGGGGATAAAACGAGGAAGAAAATTAACGCATGG
ASTF_00007198	XLOC_003904	348	285	0.7449	0.337794	0.327557	2	0	0	AAAGAATCTTCACACAGAGGAAAAAGAAAAGAAAATTCACCTGTGAAAATGTTGAAAATACAAATGCTCGAACAGATCGTGACGAACGAGAACGTAATCGACGACGATGATCAGCAGCGGCACGGTAATGGGCAGCAGCGGGGTGGTGGTGTTAGCGGTGCCCTATCACCCGGTGGGCAGCTGGCACCTAGCTCCACGCCCGGCAGCGCCAATCTGAGCCCGATCGGTGCCACATCGAAAGGCTCACCGTCGGCCGGAGCGGACGATGAAACGCGCAGTCTTAACCGTAGCGCACGCTTATCACCACAAGGGTATGTTTCTTTTTCGTATTAGCTTTGTGGAGAGGTT
ASTF_00007199	XLOC_003905	629	33	0.8778	0.361435	0.0534759	2	0	0	GTAGTAGTAGTACGCGCGATCACTTGCGATCTCTGCTAGTGCAACAAACCCTCTACAGAACGCCCTCCTATGGTCAATCTCTAGTGCAAAAGTGTGTATATACGGTGTTTTGGTGTAGTGCCTGAGCGTTGTTAGTGTCTGAGACGAAAATGTCCAAATGACCAGTGCAAGCTGCTGATTGAACCGTCTCACACCAAAGCGAATTAGACCACCCCACCTTCAGGAAATTGGGCTTGGTGCTGCTGCTTAACGTTACAGGCGTAACGTAAGCCCCTCCCCGGTCGTCCAGTTCTCAAGGTTTCTAAAGGTGTTGGCAGGGTTGTGTAAAAAGTGAATTAAAAACACGACTTCTTGAAGCTTGAAGTTACGATCTGTAACGAGATCGAAAAAAAAGAGAGT…
ASTF_00007216	XLOC_003913	456	42	1.1271	-0.0594304	0.0567142	2	0	0	GGCGACCGTATTCAATCGCGTGCGGAGTGTCGTCTCGTTGCAAGCTTGGTGCAATAGGAAGTGGGCGAAGCAGAAGCAACAACAAAAAAAACACGCACACATACGGAAGCGCAGCAACACGCGATCGTGTCCAGTCGATTTTCTAATCAAAAGTGTCACGGGCAAAGAGAGCTGGGTGAAATAAGCGAGCGAGGGCAAGGGGACCGGGTCAAAGTTGATCCTGTAACGTGTCTGTGGTTCCAAAAAGTTTTTCGCAAGTGCAAAACAAAACAAACAACCATGCAGTGAAGGCTTTACCACCGCTCAATTACACCACCACCAGCCAAGTGAGATCAGTGAGTCAGTGAAACAACGGCCAACGTCTGGATTATAGCAGCCCGTTGTGTGCCTGCAGTGTGA…
ASTF_00007376	XLOC_003993	1157	114	0.9076	-0.649382	0.00562944	1	0	0	CAATTTTGAGTTTTGTAAGCCGAGTTCTAAATTGGTTAAAACAAGGCAAAGTTACACCTGAAGCCATACTGATGCACGATCCCTGATCGATGATCGATCGACAGCTGAGTAACGATAGGGTTTTGTTTAATGATAAAATTCGTGCTAGGGAGTTACTAAAATACAAACATGCTCCAATTGCTTAGCATGAATTGTATCATTATATTTTTTTTGAAAACGCCATAATTTTATAAATGTAAGCAAACACACGCACTAAAATATTTCGGCAAGTTTTGATACAACTTTGAGACATTCATTCTAACCACAAATAGAGCATAATTTGGAACTTATAAATCATTGACGGAAGGAATTGGAAAAATTAATATAAAACTCTAAGTCAAAGTGTATAAACATAGTAAC…
ASTF_00007377	XLOC_003994	242	108	0.6938	-0.424548	0.0163198	1	0	0	ACTCACTCACCTCGTTTTTACTCACTCACCTCGTTTTTACTCACTCACCTCCTTTTTACTCACTCATCTTGTTTTTACTCACTAGAGAGTTAAACATCGTATTGGCATATCGCATTGGTCACGAATGGTTAAGAATGTTAATAGATTGTTCTACCAACAACCAATCTTTCGTTTCAAAATTGACCTCGAGAGGTGTCGGCCTTTCATTCCGAGTTCATTCCGATGCTCATGAACATTTTTTT
ASTF_00007378	XLOC_003995	632	51	0.5745	-0.443596	0.00394525	1	0	0	AAGACATAATAATGTTTTTAAGGCTAAAAAGAGTTTTACAATAGGAAGTATATTAAGTAAAATTGTTGTTTTACAGAATTGTTTCTAAACCCCAGTGAAAACTACTCAAAAATTCTGCAAAAGTTTAATGTTCTTAGTTTTTAATTTCCAAGGGCAAAAGAAGGCCTCTTAAAAGTTTTAGTACACTTATTAGTACCCACCAACCTGTTAGTAGCATTTATTAGTACAGTCCCGAGAAGGAGTGCTTTTTTACTAGTTAAAGCTAAAGTAACGATCACTGCTGAAAACATGTGCTCAGTTCTGGAGCCTATAACTCCTTACTAATGAGTAGTTGATAGCAATAAAACATCCTAAAAATATCCTAGGTACGTCAAGATAATTACACCGAACAACCAAGTC…
ASTF_00007383	XLOC_004000	2221	597	0.5754	-0.864353	0.0210031	1	0	0	TTTTCCATATTTGAATTACTTGATGAGTGTTTCGCTCATTATTTGCTGTTTTACATTTCTGTTTTCTCTACCACTAGACATTGTTTTGTGTGTACACTTTTTTAATATTTGTACGTGTGTGTGTATATTTTGTTTAAATGCTTTCGTTTTCCTTTTTTTTCTTCTTTCACACACACACACAGTCGCTAGCTTTGTTCGTATATATTGGCTTGTTGTGAGTAAGTTGTTTATCTTTGTGTTTAGCTTAGCGAAAAGTATGTGGATAAATAAAACACATGTACAAAAACGGGTTAGAAAAACAACAAACTTTTCATGTATGTTACACAGTCAAACAAACTTAGCTTCCTCCTTCCTGCCCGAATCTCATTATATCATGTACAATCCTCCTTTTCTCAAGAA…
ASTF_00007384	XLOC_004001	611	207	0.8008	-0.383676	0.0354021	1	0	0	TCACACTGCTGCTTGCTTCTTCCCCCTTTATATCTCCCTATACATCGGCCATATGGCGCGCGCACACCGGAGTTCCGGTTCCGGTTCCAAATATCGCCCGCGTTTTTTTCTCTCTTCCTTTTTGCTTTACTTTGCACCGTTAGAAGAACCCGTACGATTTTTACAAAAAATAATCTTTTGTCGCCTTTTAAGTGCGGTTTCCAATCTTGTTTTTTTAAATAGAAAATTCGTATAAAATGCAGCTTTGCTGCACATGATTTGTATTCCGTGTGTTTGTGTTGTGTACGACATTTTTTTGTTTGTTTTGTTTGCTTCACTTTAAATGCTTTTACAAGACTTCTCCTTATTTTTTGCTCTCGCGCCCTTGCGCCCCCATTTCCCCGTATCCATGATGCTCAA…
ASTF_00007385	XLOC_004002	1023	81	1.0922	0.00457146	0.0397425	1	0	0	GTGCATTTTCATTTCATCCCCTCTCGGTGCGGCGAGTTCTTCCAAAAGCCTGCTTCACCGTTCATTCGCATTGCAAGCGTCGAAGGGAGCGGACCGTACGTGCGTGCGTCGGTTTTACTTGAAGTTGCGTTCGCGCCTGTGCGTAATCGAGTTTGTGCACGACGTCACTTTGGCCGGAATTTTGAAACCAGCTCACCAGCCCGGTGACACTTGTACTCTGCATTCGCCGTACGTACCGTCAGATAATAAGGAAGAACGTGTCGTGCCCGCAGACAGTGACCAGATTGATAATTTGCTCATCGTCACCAAGTCGCAAACAAAACAAGTGTGCGTGTGCGTGTGTGTTTGGTACGAAGTGGTGCAGTGAATAGCGCTACAGTTGAATTCGTAACGCACTCC…
ASTF_00007386	XLOC_004003	460	315	0.4669	-0.445562	0.0358795	1	0	0	AACAGCGCCGTGCAACCGTCGTTTCGTTTCCGGTTTTCGATGGGAGGTCAGGTTCTTTGCTTCCCATCGCTTTCCACCTCTCTCACAATCGCCATACGAATGATTTATTCATTACGATCGAGCCTCCCAAAACGTGCGGTGCTATCAACATCCTCGTACGCCCGTGTGTGTTTTGTCTCATTTTTTCATTTGGTTTTCCTTTCAAATAATTACGTTTTTCACGCGCTGTACACAGAAATGCAAACACAGAAAAACCTTCCCCTTCGTGTTTTGTGCCTGTACGTGGATGTATGTTTTGTGAGTGTGTTTTTGTGTGTACAAGATCAGTCTTTAAATACTCTACGCTGTGAATAATTAGTGCCATAGTCGAAATGATTATCGTGTAAGCTCCGTTTTGCT…
ASTF_00007387	XLOC_004004	738	180	0.8308	-0.229826	0.0369266	1	0	0	CCCCTTAAATCACCCCTTATTCACAAATCAGATTGAAACAATCACTTCATTTAATCGTAAAGGACATCGATCATCGACTCTATCAGGCTGGATAAAATAATTAAGCTGCACTAGGGGTGTCGAGGGTTATTTTTTGCTCCCATTTCCTATTGCTTTAATCCGATTTCGGTATCATTATCTTTTCGCTGCACCCTAGTACTCCAACCGGCTGCTACTGCTACTATCGTGGATGGTTAATTATGAGTAAATAAAATTTGGATTAAATCAACCATAACTCATCGAACGGTGGCCGGACAGGGCTGCCACTGTGAGCAGCTAGTAGGGAATTGAAGTGAACCGGTATAAGTAGACGGAGCGAAAGAGAGAGGTCAAATGAATGAAGCGAACATACAAAAAAAA…
ASTF_00007388	XLOC_004005	264	108	1.1468	0.189227	0.210664	1	0	0	CCGAAGCAATAGCCATCCGTCTTGCCGCCGATGAAGGACTTCGGACCGACATTCAGAACGTCATCTTCACCGACAGCGCTAGTGTTCTGGCAGCCCTTCAACACGGTTCCTCAAAAGACCCACACATTCAGCTCCTAGATGACATCCTTCCATCTCCTGATATAGTCCTCTGTTGGATTCCGGGACAATCCGGAATCGACGGAAACGAGAAAGCCGACCGTCTTGCCAACGAAGGTCGGCTCCGTCCGGCCGAACCGCACAGCT
ASTF_00007393	XLOC_004009	482	51	1.0342	0.0848866	0.0627971	1	0	0	GTGAAACCTTCGTGTGGTTCTAAAGTGCGTTCAAAAGCTTCCCTACGAGTGACTTTTTTTTGTTGTTGTTGACGTTTACTGGCTTTTAAGTGATCTAGCGGATGTCCTTTTCGGGAGAACATTACTAAGTTTGCTTCGTATTGCGTTCGATCATTAACTCCCCTGTTTGCACCGCACGTCACCGAGAGTCCAGTGCAGATATGAGTTGCCGTCAGCAGTGCACCGCATCTCGAAACCAGCTGTGCTTGTGAAGTGAAAAATGATACGAACAGCCGAAAAAGCCATGCAAAAATATTAACCAAAAAATTTTACGGTGTGATTAGTTTGTTTCACCCATCCACCCACCCAAAATCCCAAAATCTCAAGGACGAACCCCTGCAGCGCCCGGAGCAGCATTTG…
ASTF_00007434	XLOC_004026	764	234	0.5133	-0.514436	0.0116352	1	0	0	ACAAACACACACACTCCGAGAAACAAGCTGTAAAAAGTTCTTATGCATATGATCGAATCGATATTTCAACAACAGTAACACAACACTAGATATTTAACTGCTCGGCCGTGGAAATGGGTACCATTTCCGCACTGGTTCGGTTACGAATCGAGCCGCGAAACTAATAGGACAATGAAACCGTTTGCGAGAGAGATTGCGTGTAATTTCACCGCAGCGAAGCGAAACACAATGAAACTCAAATCCAATGCACTGTAAAGATTTAAAATTAACAAACCCGCCAACCACTCGCCTGGGGGGAGAACAGGAGGGAGAAAGAAGGTGGGTAAAATTCGGCGAAAACAAAAGGAAAAGAAAACATAAACAGCTATTTTATACAACCATTGTGAATAGACGAGTAGA…
ASTF_00007435	XLOC_004027	428	165	0.7576	-0.423162	0.025285	1	0	0	TCACACTTCTATTGAAATGCACTGGTTTATTGAAGGATTTGAAAAACGAAGGGAAATTTGTTAAGAGAAACGGAACTAAAAACTAAACCAGAAACCGAAGCAGGAAAAAGTAAAGAGTCATGAGAACATAAAACCATTCTAACAAAAACCATAAATCACAACAGTGATCGTGAAATGATGAAAAACGGTAGAAGCGGCTTTGAAACACTTCACGAAACAGAAAGAAAAACCAAACACATGTCAATGAAAAAGAATAAAATAATGCAACTGTTCAAATGCAAACCTAAACTCACTGGCGAAAGTGCGATCGAGCGAACGAAGTTTGTACGTCCAATGTAAAGAGAAACTAAAACGAACGAAAGATGAAAACATGTTGGGTGCTGCTTTCATGGATTAGTA…
ASTF_00007436	XLOC_004028	249	63	0.7102	-1.04286	0.00267509	1	0	0	GCCTTTTTTAACAACTACAATGAAAGCGATTTTTTTTAAAAACGGTACAACCGAGTGAAAATAATGTGCTATGAAACTGTAAACTAAACAGAAATCAAGGAAAAAGAAAGAACAAACTTGCAAGTGAGCAGACCAGAGTATAAAATAGAGAGAGAGAAAAACATGAAACTACTTCAACCAGTCAATGCACAAAACAAAACCTAAAAAGTTTCAAAGAAACCAACAAAAAAGAAAAAAAAAGTATAGAAA
ASTF_00007473	XLOC_004048	354	180	0.8509	-0.279733	0.0572789	1	0	0	TTATTTGCGGACCTAATAACAAATCGTTATGGTTGATCGTTCTGCTGTTAGTAGTAGTAGACACAGTTGCATGATCGGTATGGTTCCTTTGGAAAGCGATGTCTCTTAGTAGACGAGGCCATATGAGCGTCGCTAGGCGACGAGCATAACGTCGCTTAGCTACAAGCACAGGGAAAGCCATTCAATAAACAAAGCCTGTGGACGGTGAAGCACCTATGGTGACTAGATATCTTAGTAGACGAAGGCACCATGAGCTGAGGCTCATTAGGCGGCGAAGTCTCTGGTGACAGCAAAGGGAAGAGCATCTTAACTTACCAGACGAAGCTGTGCGATTGTGAGTCCCAGACCGTACCT
ASTF_00007480	XLOC_004050	381	198	0.7562	-0.118941	0.0703955	1	0	0	GGTATATGGATGTAGAAGGTAGAGTTGTTTAGAGCAAATTGACATTTCTCGACCTGACATAACAGTTCCGTGGTGATCAAGGGGAAGGGTATTGAGAAGAGTGACGGCAGCGTCGGAGGAGGCGCCGGCGGTGGTATCGCTTGCGATTTTTTGACGAAAAATGCAACCAAATATCGTCAATCGTCTGTGGAACAACATTTAATATGCGAAGATGACCCATAAATTAGTGAAATTGCTCAAGGGATTGAGAATCGAGGCTATTTGTTCATGTTTGTTGCCCCATACCATATGTTTTTGTAAACAAACTCTGACATAACTCGACTAAAATGTCGCCCTGTCAAATCGATAAAAATCCACCTTCTAAATACATACACCTTGGTC
ASTF_00007494	XLOC_004055	424	57	0.8719	-0.332622	0.0172017	2	0	0	GGAAGGTCGCGCTGTTTCGCATCCCCGCAGAAATTTTTGCCGCTTATTGCTTATTAATAGCTGTAATATCGTGTGAAAATTCAATCGGTCGATTAACGTCGAAGCACAGTGAGAAGTAGAGCGTTTGTGAGTGTATTACAACATCAACAGAGAGAAGAAAGGCAGGAAAAAGAGAGAAGCCGAAAAAGCCATAAGAATAAAACAAAACAAAAAATCGAAACAACGAAAATCAACAACAGTTTTGCAAAACACCACACGCGTTCGGTGCAGCTCACCCACCAAAAAGCGGAAAAATTCGGGAAAAATTTCTCGTGTGCCGGTAAAAAGAAATCCAATCGGTTCCAACCTTAATATACACACGAGAATAAAAAGTACACGCGCGTGAGTGTGTGTGTGTGC…
ASTF_00007507	XLOC_004059	316	78	1.2258	0.107357	0.166033	2	0	0	AGAAAACCCCAGGGAAACAGAAAGTCGGCTGCGGACAGCAAAATCTCTTCAATAATCCTTCCGTGAGCGCGAATATTCTGGCTGTTCCGGTTTCGTCGTCCCCTCCGAAATGGAAAAGGCGTCCATGCGGATGTGCTACTAAAAAGCTGTGGAAACTCAACCGAACAAGGTTGACGTACTATGAAAACTGTGTGTTCGTGTTCCCTTCCCTAGAACTCCCATGATGTGTACCACCGACGACTATCGGGCAGGGACTGACACTACTAGACCTTGCTGACCGTTGACACGCAGTCTTAGTCTAGACAACGCAAGAATT
ASTF_00007528	XLOC_004070	441	72	0.8037	-0.754446	0.00583341	1	0	0	CAATCCGTCAGCAAAAGTTCGTTAAGTGACCGTTTGAAAGCGCCAGCAAAACAAGAGAGACAAACAAACAACAAACAAAAAACTACTAAAATAAACTTACAAACAAAAAATCGAATGTAGGAAACAAATTAAACAAAAACGAAAACGCAAAAAAAAAACATCTGTCTGTGTAACTCTGTGTGTAATGGATAGGTTAAAGGTGGTTAGTAAGGAAGTAAAACGTTGAAGAAGAAGACAAAATGAAAAGTGCGGGGAGAGAGGAAAGCGGGATGGGAAAATAACACAACAAATTATAAGTGATAGTATCTAAAAGTGATAATAAGTAAGGCACAGAGCAGGGGCCCGAACGAGCAAAAACCAAATAAGAACAAAAAACATAAACAAACTCGATCAAACTCG…
ASTF_00007529	XLOC_004071	603	270	0.678	-0.256715	0.0571255	1	0	0	GATCGTATCCCCGTCGTCTCCGTACCAAGCACACACGCATCATTCACGAGCGCTCGCGCATTCGCCTTCTACTAGACGATCGAATTTAAACGAACGTCAGCACCACCAACGGTACTACAAGTACCCACAATGTCTACCCTAAGTACAAATACAAAGCAAATGCAATTTTGCCCCACTTTGCTGTAAAGCACCGGGCGCCTCCATCAACGTTGGATGGGCGTTTTTCGTGGTGATAAAAGCTATTTTATAATCAGTATTTGAGTAAGTTTTTCAACGCACCCGCGTGCGCTGTGTACTGTTTTCCGTAGTTAGTCGAGCCCCAATCACAAAAAAATGAATAACTCGTTCAGCCGAAGTACTGATAACTGGCTGCTAGTTTCACCAACATACACCGGCTCT…
ASTF_00007530	XLOC_004072	1523	318	0.4194	-0.474408	0.00731911	1	0	0	GTGTTTGAAGGTAGAGAGCAAAAAAAGTGCAAGTTTTGTGGATTATATATTGGGAACCGATAGCTGGAACCGCAGGAGAAGTGAAAAGAGAAGAGAAGATAGAGAGATAGCAACAACAAAAACACACACAAAGGGAAGAAAGGTGGTGAAACAAAGTAACAAAAAAAAAAAGTTAAAATAACACATCTCAATAATCTGTATGTAATTGTAGTAGATTTTGTCCCTCATTCAAGCAAACCGTAAAAAAGCCCAAACAGTAGAACGAAGAAGAAAAGAAGAGGAAACAAAACAAAACACAAACCCCCAAAAGCTAATCGTATTGGATTGGAACTCACTAAGTAATCTCACGCTAATCTCAATGCAGTGCACACACACACACATACGAAAGCGCTAAAAACG…
ASTF_00007531	XLOC_004073	2122	672	0.4577	-0.653915	0.052215	1	0	0	AGAAGAAAAGAAAGAGGAAAAAAAGGAATAAAACAAAACACATAAAAACACACACATACACACATACTAATACATGTGCGAGCACGCGATTACAAACTAATTTTAAGACCAAGAAGGCATGTGAAAACTGTTGCTGTTTGAAGAGCATCACGTCTGCATGTTATTGTTTCGCACCTCGTTTTTCTAAACTTTTCTGTCGTTTGGTTTTTTGTCTTCTTCTAATACTTTAGTTACTGTTTCAACTTCACCCCTGTCTTCGGGACAGAGTAGGTGTTTGTTTTTCCTTCTTCATCATTCCCTTTATGGTTTTCTCTACTTTTATTTTGCTGTCTGTTTTTCCTGTTTGGCGGGAGGTATCACTCTCACTCACTCTCTCTCTGCCCCAGTACAAATCGAAAG…
ASTF_00007537	XLOC_004076	894	105	0.4238	-0.190053	0.00517942	1	0	0	ATTCGCAAAGCGTAAATGATTAAGAAAAAAAAACAAAAATCATATAATGTGTGTGTGTGTTTTTAAGAATCATAAAAATACGAAACGAAGAAGAAACAAGCGAAAAAACCAAGGGGGAAAGTAAAATGCAAGGAAACAAAATCTCGAATTTAAAGTGAAATGAGAGAAAGTGAAGTAGAATATATTATAAAGCAAACAAGCAAACAAAAGAGGTAAAAACACAGTAGCGAAACAACTTACCAATGCAGGGGAACGTGTGCAAGCCAACTCGAGCAAGGAATCGAGAAAAGAACGAAACACTATCCGATCAACGGTGTGCGCATTTAAGTGTCGGAAAAGATGAGTGACCGCGTAACAGTGGGCGACAGTTGCTAGGTTTACCTCGTAGATCGTAGTAGC…
ASTF_00007538	XLOC_004077	2002	291	0.8391	-0.581448	0.0082135	1	0	0	AAAACATACAACAACACACACGCACACGTGAGCACACAAACACACAACAAAACAAGAAACTGAGCAAAAGAAGAAGAAAAACACACACACACAATCCTCTTATCCTAACGTATTATAAAAAGGTGAACGTGTAAACGAAGGTAGAAAAGTATTTCTAAATTCTAATGATTTTATTTTGCACACACACACACACGTTTCGGAAGAAAAAAAACAAGTAATTGAAAAGAAAAGAAAAGAGAAAAACAAAGAAAGGATAGTGATAGAACGCAAAAAAGGTGGGTCAGTCTTTAGGCAAAAACAAGAAAACAAGAAAAAAACTAAACTAGAAAACAAAAACTAACTACTTTTAGGCATGATGAGGAATGTGATGGAGGGAGTGAGTGAGGAAAGCAAAACTCG…
ASTF_00007539	XLOC_004078	464	219	0.789	-0.742043	0.0201522	1	0	0	ACAATCAGAAACATAAGATGATAAATCGTTATACAATAGTGAAAATGAGTAAAAGAAAAAACAGTAACAGTAAAACTGAAGAAGAAACAAACAAACAAACCAGCAAATGCAATAAAAACAAACAAAACACACACACACACACACACACAAACTACAAAAACCACACCACACAAAGTACATCACACACTTACAATTACAGAACAGAACAAAAACTTTCGCAGAAGAAAACCGAATAGGAGAAGATAACAAAAAAAAACATAACCATTTCCGGCAATAGGTAAATTTTGGGATGTGAATAATTCAGCAGATTCAGCAAACAGATTCTGGAACAGGGTCGAGTAAAGGTGGTGGAAAAAGCCAGCGAGTAGAAGAAGCACAGCAACAACGAAAACAAAACGT…
ASTF_00007540	XLOC_004079	419	216	0.8438	-0.416285	0.0514282	1	0	0	GAAAATGAAAGAAGAAAAACATAGGGAAAACACATTTGACAAACAAAATACTGTAACAGGTTCAAAAGAACGAAAACCTGGCTAGCAGTATAAAAAGGGATAAATTAAATGAAACAACGCAAAGGTGGAAACAGATAGGAAAAAAACAACCGAATCAAAGCAATCGCCACCATCAAATAACATCATCGAACCATCTTTGATGCATGGCTTGCTTGGTTACGGTTTGCACGAAGATCAGTAAAATGTCTCTCAAGCACACACGAACAGCAGCAGCAAGAAGGGCAAGTACTTTTTTTGGCAGAGCAAGGCACGGCACAATTGTTTTACTTTCATGTATTCGGGCGTGTCAAGCAAACAAGCATAGGAACTCTCTCGGAACACACTCGGAAAACCAACTGG…
ASTF_00007541	XLOC_004080	523	150	0.5635	-0.738518	0.00527318	1	0	0	ACACACACACATGCAAAAAGGATGTGGAAAATGGATTGCAAAAAGGAAAAAAACCTACAAGGTGAAAAGTACATTTGAAAGCGCATAAAAACTTAACAAAAACAATGGATTAAAATTAGATTACGAACGCATCGCCAAACGGTGTGCGTGTTTCTACGGTATTGGTAAGAACGCAAAGCACAGAGCAAAGCAAAACATTATAGGCTTAGAAACGGTTTTGAATGAATAAACAAGCATGGCGTGTAATGAGGTATTCTTTTAACGATGAAAACATACAAAAAGAAGCAAAAAAAGCGCGTATCGTAAACACACAACTCATCAACAAATTCATGAATAATTATTATGTAAAACAAACACATTTGTGCGTGTGAGTGAAAGGAAGTGACAACAAAACATAAA…
ASTF_00007542	XLOC_004081	254	39	0.7223	0.0152228	0.0266258	1	0	0	ACACACATGCTAGGCATGGCTGGGGAAGGCAAAATCGATTTGTGAAAATTCCAAAACAAAGCAAAATTGTAACAAAATTGTGCAGCAAAAATAGTCAACGCAACGCAAAATTGCAAAATAAACACACTCAAATTAACACACAGACAAAACACATAAAAACACACAAACACTTACACAGCCAACAAACTTTTAGGTCAGATAAACGGATGAACATATGAGGAAAAGGGAGAAAAAAAGAGAGTGAAGAGAGAGAG
ASTF_00007545	XLOC_004084	492	204	0.6544	-0.142315	0.0457745	1	0	0	CGCCGTGCGGTAGCGACCACCCCACAGCACACTTTGCTATTTTTGATACATCACTAAACACCACCATAGCTCACTATCACGCCGTTTCGGTGGTAAAATGACGCACGCACAATGTTGCCCTGTAAATTTGCATCGATGTGGGTTACACTTTAACCTTCGAAAAACCCTATGACCACTGGCACTGCCGATAGCACCGTGAAGTGATGCGGGTGGTTAGCGTAACGTGCAGAACACGGTATGACGCTACCAGGCTTATCACTCGCCCTTGTTTTGCTATATTCAAACACGCACACACCTGTTGCAATCACGGGGCACGTTGCTAGGGCGCGAAACCAACCAGAACCACCATCGAAGAACACCGAGCGCCACACCGATATATCGGACCGGTGGTCGGACCAA…
ASTF_00007546	XLOC_004085	686	171	0.6046	-0.717109	0.00605614	1	0	0	CCCATTCGCTCCCACCGCCCCTTCCTTCGCTTCCCTCTGATCTGATCCTCTGTCTGTCCACATTCGTTTCACTCTGTGGTTCGTTCACTGTGGTGCCTTCCCAATCGACCATACTGCTAGCCAATTCATGAACACACACGCACTCTCGGACGCAAATTTGCATAAACCGTTGCAATTTTTTTTCTTCATATGTTCTGTTCAACTTCTCCGTCTTCTCCGTTCCGTTGCGTTGCTTGATTACTCGACTTACTTACTTTACTGCTGTTGTTTGCTACCTTTGTTTTTGTTTTGTCCTTGATTTGTATATTTTGTTTTATTATTCAATAGGTTCAATGTCATGTGTTTTTCTTTTTGGTTAGGTTTGTGTGTGTGAGTGTGTTTGTAGAGTTTCCTAGTTGT…
ASTF_00007547	XLOC_004086	636	186	0.5569	-0.577409	0.0089035	1	0	0	ATGTTTTCTTCTTCTAGGGTCTCAACGCCATTCCCTCAACCGGGGGGTTTGTTTGTTTTTTGCTTTAATCTCATTAATAAAAGTGAGTGTTTTGTGTTACTTATTTCACCTCCACTTCACGCCCATTTTCAATAAGTTTACTTCTTTATCAACAACAATTTATTTTTAACATTATTTTATTACCTTTTTTGTAATTAGTTTTCTTCCTTTTTCTTCTTCCACTTCGTCCCACCTCCATCCATCCACCCTTTGTGATTGATCGCTTTGTCATGTACGAGATGTAGGATGCATCGCTACCAGACCTAGTTTCGCTTTCGTCCATAGTTTCAAATATCATTTATTCAGTGTGTTTGTTTGTTTTTTTATTTGTATGTATTATTTAGGTCACGTTGCTACAAT…
ASTF_00007548	XLOC_004087	1349	219	0.8242	-0.554984	0.0106579	1	0	0	TGTGAGTGTTTGTGTGTGTGTGTGTGTACGTGTGAGTGTGTTGGGTGTGTCTCGTACTGCTCGGCACCTCGTGCGTGCCCTTGCAGGACTAATATTTCAGGTTAGTTTTTCCTTTTCTCTTTCGCTCGCTTTTCGCCCCTATCCGCTGCGCTGTTCTGTTCAACTATTTTCTTACTCTCTTACACGACTCACGATATTGTTAGTTTTGTTTCATGCCTTTAGTTAATTAGTAATAATAATAAAAATGTATCTCCTAGCTATCTAAAAATATTTCATTTCATTTTTTTATCCCCCCGTACGGTTAACCGGTTTCCCGTTTTTCTTTTGCTGCTGCTTTGTTTTTGCATCTTTCGTTTATCTCTTTCTTACTTTTCTTTTTCAAGTTTCAAGATTTCTTTG…
ASTF_00007549	XLOC_004088	267	135	0.7142	-0.765531	0.00956353	1	0	0	ATCCAATAGGTTTTCTTTTGACTTATGATTTTGTCGAAACTTGATTACGGCCTATCCGCTCTCTGCTACTTTTTCACTATCTTTTACAGTGATTTGCATGTGTTTTTTTTATTGTGTGTGTGAGAGTATGGTCACACTCACCCTTCTACACATTCCTGACACAAAACTGGGGAATGAAAAGGAACAAAGAACCAACAAATTACACAGCAGGTGTGTTAGTATGTGTGTGTGAGTGTGTTCATCCTATTTTCGTTCAAACATGTCACA
ASTF_00007550	XLOC_004089	2854	234	0.6451	-0.368007	0.00146744	1	0	0	TTTATTAATAGTACAATGAAATTACTAACGTTTTTTGTTTGTTTGTTGTTGTTGTTTTGTTTTTCCATCTTAAGTTTTGTTGATGTTTTTTTTTAAAGGTTTGCGCTCTACCTTTTATCTTCTTTTCCTTTTTAACTTCCCCCCCTTTACTCTCTCTCACTGGTATTGGTTTCTCCTTTCATTTTGTCAATTCCCGTCTTACTTACTGTTTTTTTTCTTCTTAAGTTCCTTTTTGCTATAAGGAGGTTAAGTTTGTTTGTGTGTGTGTGTGTTTTTTTCTCTCTCTCTCGTTCATTTTGTTACTTTGTTTTAGTTGTTGTTGTTGTTGCAGTTTTGCAATTCCTACCATTCCCTCTTCCTAGTGAATTGTTCGTAGTATTACAAAGTAATAATAATAGT…
ASTF_00007551	XLOC_004090	925	141	0.5931	-0.861734	0.00231662	1	0	0	GTAGGTATTGTGTGCACAAATGGGAAGAAAAACAATAGGGGGATACATTAGACAAAAGCTGGCATACATCGCCCCCTTTTAGTATTTTGCTGAATTAGGATATTTGCTTTGCATAATGTGAAGGCCTCTATACACTGACTGACGCGTAAGTAGTAGTAGTAAAAGAAAAACGAACGAACAGATAAAGGTGTAGAGTTGTAAAGGCGGGATTACATATCGATTACGGGCAGGAGCACAAAGTAAGCGACTAAGGTAAAGATGTATGGCATGTAAGGAACGGGGAGGACTTTGCGTTGAAATCTAGCTTACATATAACGATCATATGCATTCATCGGTAGGGTAGTAAGAGCGGTAGTAGTAGTAGTAGTAGTAGTAGTAGTAATAGTAATAGTAGTAGTA…
ASTF_00007552	XLOC_004091	1099	285	0.5656	-0.412323	0.0172057	1	0	0	GTTTGCGTATCAGTATCAGCACCAACTATTGATTCGTTTTGCATGTCTCGTTTCTGGTTAAATTAATCAAAATGTGTTAATCTGTTTCGTCCGTTTTTTTTTTGTTCTACCCTTCTACTTCTCGTTCTTCTATCTTGGTTTTGAAATATCACAATTTTTTTTTGCTGACTTTTCCACCTTTTACCTTCTGCTAATAATACTTTTATAACTTTTGTTTCAAAACGTTTAAATTATTAAATTAAATTAGTATCCATTTTTTTGTTCCTTTTTTGCAAATAAATCAGTGAGAGCAATCAGTCAAGTGGAGGTGATGATTGTGGTGAAGCCTGTATGCGGAAGAGATACTTAACAAAAGAATTGAAGATGTATAAATTATTATCACTTTCCTTTGTGTGCAAT…
ASTF_00007553	XLOC_004092	1136	138	0.8063	-0.559212	0.00654189	1	0	0	AGAATAGAAAACTAAAACAACAATTTACTGAAACAGTTAAGTGTTTTATTTAATAGTTTTTTTTAAGACTTTTTTTTGTTTGTTTGTTTTTTTTTCTTTTGCATTTTTCGTGCTTCCTACCGTGCTTCTTACCGCACTCACACAATTTTATCTCTTTCATCCTCACGTTATCCATCGATCTGTTCGGGGCTTTTTGCTTCCCTCTCTTCCTCTTTTTCGCGCGCATATCGCAGTATTCAACGTATTATCTAGTAATTTTACCTCGTTTGTATATATCTCTTACAGCCTACAAAGTGTATAAAGTAATTATTCTGTAGTTGTTTTTTTTTCTATCTCTCCCCTTCTCCATTTCGTCTATTTCCTTTTTCATTTTCTTTCTTCGCTCCTTCCTTGTATGTG…
ASTF_00007558	XLOC_004097	270	81	1.0378	0.310155	0.166946	1	0	0	GCGTCTCCTGTAACGCGGCTACTCGTGGGTCGGATTACGGACTGATTTGAGGGCGGGAGTCCTGTGTGCTGGACCAGGCCATGTTGACGGGGCGTCCGCACTAAGCTGGCCGTCAATATGGGTGTCACGGAGGAGTCCGAGACATTCAGGTTGGCTAAGGAGAGACACATCGAGCGAGGGGTGAAAACCAGCAGCTAAGAGTCTCCGCGGCAAGCAGTAGTGGGATAGCGTCCCGGAGTGGACTGCCAGTGCCAGCCCGACCAATAAAGT
ASTF_00007559	XLOC_004098	458	144	1.0701	-0.745055	0.0239921	1	0	0	ACGATTTAACCTTTGTTCTTCAATGTGTTTGCTTCTTTTGTTTGCTCTTCATGGTTTGGTTTGATTGTGTGTCTGTTCGAACGATGGCGACAACTGTTTCGATGTGTTTTTTTTTCTATCCGTTTTTTACGTCTGTTAGTAGCTGTTACTTTCTGTTTTCTGTACGTGTTTGAGTGTGTTTTTTTAAATTCTGTTTTTGTTTCATTTTTTTTCTCTTTTTACAAAATAGCCAAAGGCGAGGCACATGTTTTCCGTGTGTGTTTTGTTTTTTTTGCTTGTTTTTCCACATTTTGCTACTGCCGGTTTTTTCTTTCTTCCTCTTTTCCAAACTGTTCTATCTATGATCGTTCGTTCTCGATTGGTTTTAGGGCCGCTAGCCGTACTGTGACGCTTTTAATT…
ASTF_00007560	XLOC_004099	256	81	1.0378	0.400891	0.202021	1	0	0	ACGCGGCTACTCGTGGGTCGGATTGCGGACTGATTTGAGGGCGGGAGTTCTGTGCGCTGGGCCAGGCCATGTTGACGGGGCGTCCGCACTAAGCTGGCCGTCAATATGGGTGTCACGGAGGAGTCCGAGACATTCAGGTTGGCCAAGGAGAGACACATCGAGCGAGGGGTGAAAACCAGCAGCTAAGAGTCTCCGCGGCAAGCAGTAGTGGGATAGCGTCCCGGAGTGGACTGCCAGTGCCAGCCCGACCAATACA
ASTF_00007564	XLOC_004103	421	135	0.7373	0.135494	0.0662447	1	0	0	ATACGCCCAGAGCATACGTTGTGATTGGGAGGCAGACCATCTCTAAAAATAACATCCAATGAAAAGATAAATTGATAACCCATTGATAAAACCGTCCAAGCAGAAACCGGGACCGAAATTCGTCACTGACTTGATTTCCTGCCCGTTGTTCGATTAATAGAGCCAATCTAAACGATCAATTTAATGCTTTTGCTGGTTGCTCTACCCTGCTCTATCCCCTATCCAACCAGTAACGATCATACCGTAACGCTTCCTCCTGAAAACCATCCAACAGCTCTGACACGATGAAACTTCCTTCCTGGTGGTGTCTTGTGACGATTACCGTAGTGGACGTTGTGCTTAAATTATCGTTTAACAGCACCCTGACAGCACGTGACGAGCACTGTCCGGAATCGGAAT…
ASTF_00007565	XLOC_004104	1676	180	0.5549	-0.0859879	0.00661358	1	0	0	TGATTCTCCCAACTGCCAACAGTGCTCGAAGCGTTACAAACTGCTCGAATGCTCACGCGAGTAACGCACTCTCTTTACTGAGCATCGTTCTCACAGCTCCACCACGTAACACCGGGGAGGGAGCATCAACCGGCATTTAACTGCTCGCACGCTGGACGCTGCATAAACACAACACAACAAACGACGACTTGTTGCCTTTACCGGCGGCCGCACGCTTTACAGCAAGCTGGTGGAAGGAAGTACGAGCCGTGTAACGTGTAACTTGGCCGTGCCGTTGCTAGAAAGTGGTTGAGCAAAGTGGATAAACTTTGCGGTTTCGGTATCGCTTTCAACCAATCTTCTCACATCTCTGTCTCGCTGCACTGGAGGAGCCACTTGCTTGCCTTTCACTTTCCCTGT…
ASTF_00007566	XLOC_004105	381	246	0.8445	-0.036826	0.154761	1	0	0	TTAGATCCATTTTTTCGTAATATTTCCAAGGGCATCAGGTCAAATGTTGACGCCACTTTCGCGATGCCCTTTCTGTCCGCTTTATCACACTGCATCTCGCTCATACCATTCTGCTGTTTTATCTCGCTTTTCCTCCACTGTTTCAGAACAGTTTGTGACTTATCGCAAATGCTCCGACTCAATCTAGGGCAGCTTCAAACTGGAAGCTTCACCGTCCCGCCCCTTCCAATCGCGCACGTTTCCATCAATCAAAGCAAAACCGGAACGGAACGGAGCACAAAGCCCGCCGGCCACCAGGTCTCAACGTGACCGAAAAATCCCCGACCTAATGATGAACCTGTAGGCCGACAGCGTGGCAGGCAGGCAGGGCAGGCTGTTGTT
ASTF_00007567	XLOC_004106	697	297	0.4547	-0.294649	0.0307877	1	0	0	CCGCCACTACTTTTGTTATATGTTGTGTTGTCTTTGTGGTAAATGTTTTATGTTGTGCAATGTGTGATCCGTTGACGGAGCAATTGCATTCGAGGGCAATTTTCTTACTGCCGTAAAAGGAGGCAGGCTTGTGTGTTTTTTTTTTGTCTGTAGCAGTGTGCTGCAAGTTAGCCCAGCTTTGATACGGCGGGTCCACCTGTGTTGGTGCTGGGCTCGGGAGTGGTCGGCGGGTACAGCCTCGTAAACAGTGGAGTCACTCCAGCTGTTGCGAGATGGAATCCGCCGATCGCTTTTGAGTCCGATGTTGACTTGGTCGATCATAGGCTGTGTCATGGCTGGGCTACTTGGAGAACATTGCACGCAGAAAAATTCATGTTTGTACTGTCCAAATAACTGTGC…
ASTF_00007569	XLOC_004108	547	288	0.5088	-1.20168	0.0049076	1	0	0	TGTGTTCGTGTTTTGCTCCACTTCTTCCTTTTTCCCGTTCTCTTTTTTGTTTTGTTTTCTCGCCTTCATTTGACATCGAACTGAAAATCGGAAACAAACCGAAACCTTACGCGCTAGTTACAATACGTTACAATGGCGCACCTTTGCTTTTTTTTATAAATTCATAGAATTTATAGACACTTTCATCGTTTTGTTTTTTTTCGGTTTACAATGTATTATTCACTTCTTCCTCCTTTTCTCCTTCGTTTTTCACCCATTGTTAATGTGTTTCATTTTTTTGTTTTGTTTTCTCCTTTTGTTTGTTGTTTTTGTCACACATTGCTTTGTTTCAAGCGTTTTTACTTTCTTTTTTGTTCGTTTTTCTGCCAACCCTTATCGCAAAAACAAGTCTTATCATTC…
ASTF_00007570	XLOC_004109	727	186	0.7151	-0.280596	0.0251001	1	0	0	ATCGTTTTGTTTTTAGTTCATCATAGTTATCATAAAAAATGGAGTGTTTGTTTTGTTTCTTCAGTAGAAAAACAAATGTTGCGAGCGAAACGCTCATTTGACGACGAGGTGGCGCCCAGCCGAGTACACAGTACGAAGAAGCTTTTGTTTGCTTTGATGGTGTTACAAATGTTTTCACCCTTTTTCAAACGCTTTACCGTTAATAACGCCAAGGACAGGGACAGTTTTTTTGTTCTTGGGGGAGACAGCTTAATTTTTTGATTCACAAAGTTTTCCGTTCGTGCGAGAGAGGGTTTGAACTTGAAGTTACCGGAAGGGGGAAAACGATTAATTTGATTTTTTGTCACTCATTTAAACTCCTTCAATTAACCCAATTTTTAAAAATTTGTTTCCTTCCCT…
ASTF_00007585	XLOC_004117	263	141	0.703	-0.497111	0.0183475	1	0	0	AATCGTACCCCTGCGCGTTACCCTGAACGCAAGCTTAATAACGCAACAGAACGTAACGCTGGATTTTAAATCTTAACGCATAGCATCACGCATCACGAATTAGCACCATTCGGCAATATTTAATGAGGTCCGTGGTGTGTTACGCTTCAACCCGTAGTTGGGGTGCTCTTTGTGTGCTGCTGACACAGTCTAGAGCGACCACGTGTAGGCAAGCAACACACACAGTATGGCTTCAAGGTTGTTTTTTTTTTATCCCCAACAGC
ASTF_00007586	XLOC_004118	1222	264	0.7404	-0.277344	0.0277968	1	0	0	ATCCCTCCATGAATGATAAACTGCAGTCGGACGCGGATTGGAGCCAATTTTTCGTTCTCACTTCGTCAGCCTTTCCATGCTGAAGCGTACTGCGAGAAAGTTGGTAATGGATGCAGGACGAGTAAAGATGGACAAAGCACGTACCGATTCGCCGCTGACCGCTGTCAATTGAAATTAAAAAAAGTGGGCTGATGCTATGTGTTTCGTACTTGCTGGAAGTATTTGTTTCAAGTTATGCAGGATAAGAACATTCCTTACGTTACTTAATTCCCTTTCGGAAGCCAGGGAGAGCGAGAGAGCGAGAGTGATTAGAATGGCAAAGTTACATTTCTTGCATTAATGTTAAATTACATTCTGTCAAAGCGGTACATGTTGCTGGTCCGGTATTGGTGCGAGAGT…
ASTF_00007647	XLOC_004153	1668	201	0.6174	0.130141	0.0160332	3	0	0	AATATACATAAACATTAAAGGCACACTCACGGCCAGGTGCTCCAGGTGTATGGATAGCGAAAGCACCCTTTTTCATGGATAAAATCATCTTAACAGCCGGCCGGTAGCCCTGGAGCAAAGGACTCGACTTCTCGAATTATCCCCCCTGGTTCCGGTGTGCGATTTCACCTGCCACGTGCTTTGCATTAAAACTTAATGCCGACCAATTATTCACCGTCAAAATGGGTGGAAACCCGTACCCACCTTGCAAGATGTCGGGGCTTCTGATTCGATGCGATCTGTGAACCGAGCCGGGTGGAGAAAAAAAGGGCCAACCGTAAAGACAGGGAAGTGCGCAAAGAAAACGCAAGGACTGGAAAGATTGACGGTGCAGTGATGCATGAAAATTAGACCATGTGA…
ASTF_00007659	XLOC_004159	280	177	0.6254	-0.347146	0.0276156	1	0	0	AAAGGACTTCTTGTAGGCAAGATGCGGAGTTGCTAGAAATCAGTGATTGAAGAAAATTGGTGATTCAAACCAGCTCGACCAGCTTCGTCGTTATCTCATTGTGGTGCAGAAAAAGCATTCCGTGCGTGTGTTTCTTTGTGTTGGGAAAGAATAGTGGTACCATGATGGGCCGAGAATAGTTTCCGGACCACCAAATCCAAGTGTTACCTCGGATGGTAAAGAATACGCACGTACCACACGCGTATTGTGTATGCAAGGTGGATGCATGAGTGAGACCTGC
ASTF_00007677	XLOC_004170	522	213	0.9515	-0.0803497	0.123145	2	0	0	ATGTTTTACATGATGAACAATTTCGTGGTAGAAAACAGCCTCCTAAGTTCCGCCGTGATGCAGGGGACAAGTATTACTAGCGCATTGAATGGATGATTGCTGTCTGATTACTGGGAAAACGAGATGTGATACGATTGTTTGACATGGTTTACCTTAGGTTGGCAGGAAGCATTCCACCGATCGCACGTGGAGAACGCGGATTTTTACGGAGAAGCGGCAATGCAAGGCTTACGTTAGCGAATTTTCGGCACGGTTGTCTCATAACAGCAACCGTCTCATTTTCTACGATATCTGGGAGCAATGAGGAAATACGGGGATAAATCAGAATGCCAATCAGCGTGTTGGTTGTAACGGGCAGCATACGTACATAATACCTTCTGTATTATTACTGTGTCGTAT…
ASTF_00007685	XLOC_004176	192	12	1.0354	-1.1662	0.00363077	3	0	0	ATATTATCGGGTGTTTTGGTTTCTTTCTGGTTTGCTGAAACAATCGAAAATTAAATACAGCAGCACAATTGAACAATCGCTTAAAGCCGAAACGCCAAATGAGACGTAAATCAAGCTTCTCTCAGCAGCACATATATACGTGAAAAGCACAACAATTCGTCGGTTTTATTCAATCACATTCAAACTCGTGCA
ASTF_00007686	XLOC_004177	1443	192	0.4334	-0.48374	0.00274201	2	0	0	CGGTTTGCTACCCACACAGAACAGCGAGCAGAAGCAGCAAAATCACAAGGACTGTACAAAATGTTGGCCAAGATTTGAGCTGGGGAACCTCCCATCACAGGGCTTCGCATAAGGCTGTAAACGGAAGGTAACATCGTCGCTTCAAAAAGCTACTGCCCAACATTCGATCGTCCAGGCGGAGGACTGTGCACTTGTTTTAAAAGGAACCCGATAACACTAATCACCGCTGCTGTAAACTAAAGAAAAGAAGGAAAACACAACACTCTAATGGCTCTACTTTCCAGTGATACCCAAAACAATCAAAACGAAACGTAACAGGAACATTGTTCTGGTGGCGGCCTTATCACACGCGTCAAGCTGTTTGGGACTGAATTGGTCGTCCATATCCTAACCCCCTTT…
ASTF_00007724	XLOC_004190	478	105	0.8783	-0.416363	0.0203728	3	0	0	CTAAAAATACGACCAATAATGGAACATATCCCATCTATCCGTCGACGTTCATCGTTGTTTTCGATTAATCATGTCGATTCCGGCTCCACCTCCAATGAACTCGTTAGATACGAGAAGCAGCTCCGGTTCGAAATAAAACAGTGGACTCATCTGCTTCGTTCAAAATCTCAAAAAATGCAGCAGCTACGCGCAGCTTCGTGCCACATCGATCATACTATTCTGACCGACGAGCAGCGCAAATATCTTGCCAACGGTCCAAAGGTTGATCAATTCATTGCAGAAACCGAAGCATTCGATACAGCTGTAACTGCTTACGTTGTGCGTAAATCATTTTTGATGGAAAGGAATGCTCATATCGTCCAAGAAGTGAAAGCATTGGTGGAGCTTGAGCTTAAAGAT…
ASTF_00007748	XLOC_004204	687	75	0.8666	-0.0560084	0.0265386	2	0	0	CATCAACCCAGTGCGTTTAGCATCATCAAAACATTGCGAGCTACAACAGCGACTATTATTTCCTAGTACGTTCAAATGTAAATGGAAGAATACTAGAAAACTGCATCGTTGGATGGACGGTTTCTTTGCTTCACGCAAAGGATTTCAAGCACATAAAAATGGCAGATCCTCCACCAGAAGAGGAGCGTCAGCCCGAGCAACGAGAGCAGCAAATTGGATGGTTAGAAGCGGACCAATTCGAATCCGCAGAAGACATTGAAAATAGTGTCGTAAACTTGGTGCCTCGTCGTTCGGCACGTAGACAAAGGTACGCGGCCAATAACACAAATGGAAACGCTGGTGCCCGACGCAGAGCAGCTCCGGCACGGGCTAATCCAGCACGGGCTACACCAGCACAGC…
ASTF_00007760	XLOC_004212	768	228	0.6758	-0.270505	0.0311574	2	0	0	GTTCGTCTCGCGACGAAAAGTGCTAAAATTCAATAAGGCACTTTAATGAAAACAGAACAGTTTTTGTCTATTAGTTTCGATATTCTTTCGGTAGATTAACGTGACAAAATGAATCATCCGATATCCGCATAACATCCGCGCAAACGGCAAACGATGGCAATGGAACGTGCAGCTTAAGCAAACGAACGCTTTCCTGAGTGGCGCGCATTTGTTGCACCGTTGGTTCCGTTTCGTCAGCACAATCAAACCAAACAAACGTCCGGTTCCGAACGTTCACTGCGTAGGACTAAGCGCGAATGTCCTCCACGTTTGTACGTTGATTCACTGCTGCACGCCACCCGGCCGCGGCGTAACCCAGGAAAGCACAACATCGTCGTGTGGTGGCAAAAATACAAGAGA…
ASTF_00007778	XLOC_004218	423	69	0.9417	0.0773796	0.0596059	2	0	0	TGGTTGCGCTTACGAGCTGTCTCGGTTTTTATTGCCCGGACCGCCGGCTGGGTTTTTTGGTTTTTCCTTTCCGTTTTTTCGACTCTCCGTTTCGTTCCGGTTTGGTTTGCGTTTCGGTCCCGGCACCGGTTTCGTTTCGTTTGAGGTTTGTGCTCCGGTTGTGTTGCAAAAGTTCCGTCTCACGCAATAGAAGTAGTGGACATCGTCAGCCAATTGGTTTTTTCGTTCCTTCTTTTGAAGGTTATTGGGCTGTCCTGTTTTAAATTTTAGCAAACTCCCGGAACCCGGAACCTTTTGTTACGTGTGTAGCTGCATTCGTCCTCGGGTTGGGCTGCAGCCGAGCGCTTGGACGCGTTCCCGAGCCATCAGTGACCCGAACGTAGTTCCTACAAACGAATA…
ASTF_00007780	XLOC_004219	395	213	0.5439	-0.35761	0.024922	2	0	0	AAATAGGAAAGAGGTTAGAAAAGTGCATGTTGTTCTTAAGCTTATTTTCCGCTGAGTTTGATTAGATTAATGTTCCGTTAGTGTTTGCACCATCTGTTAGTGTGCTTTGTGCCTGGTTTGGGCTAGGTGGACACCGGTGTGTGCTGCAGTTAGTGAAGAAATTTTAAATTGTGATTCGATTGAGCTTGTCTCGTTTTTGTTACCCTGGTGGAACGTTCTCGGTAGTGCAGTGTGTACCGGTGTGTGTACTGGGTCGCGCTTTTGGGTCGAAGCTTCCCGTTTTCGTGTGGATTCTGGTGCCCCAGTTTTACGTTAAGCGTTCTACGAAACACGCCACTGTTTACCCATAGTGAAAAACACATCCACCGTGATTACTCTAGCAGAGCTGTGTAAAG
ASTF_00007783	XLOC_004221	808	150	1.0406	-0.068073	0.0684548	1	0	0	CAAGCATAATACACGTGCCTCCACAGCAGCAACAGCAGCAGCAGGCTCCAGCGCAGTGAGAGTGATAGTAAGAGAAAATTGATAGCAGTGAGGAAAACGGCGCGGTTGTAACCCCTGTGTACAACCCACGGCCACACTGTACGCGTGCATGATCCTCTGTTACAAATGCAGTGAAAATGAGCCGTCAGCAATATAGTGTGTACGCCGGAATGGTGGTGTGTTAGTGGTGGGTGCTGATAGCAGCAAGCAAGATAGAGCAGGAAGGAAAGCCAGCGAGTGCATAGTCCTCCCGTCTGATTACACAGCAGTGCAATTCAAGAGACACATTTTCCTAGCCCCAACTTGCGGGGTGGAAATATTTTCCAGATCTCTGTGTATTGGGGGTGAACTAGCGCACAC…
ASTF_00007804	XLOC_004230	2050	369	0.491	-0.412959	0.00807539	1	0	0	TTATTTATTTGTGAAATTGTCATACAGGATAATACAAATAATGCAATACGTTTCTATGTAAAAAAGGATAACCCTTTCCATTCCATTCAGTAGATAGATAATAATAGTTTCAGTACAAAAACCGAATCGAATATGCCTTTCGCATGCACGCTCGCTTCACAAACTCTGTACGCTTTCCACTGAAGTTCTCCGTTCCCACTTCACTAACCACCACCACCTGACCAATCGGTACCGTGGTACAGCCTCGTGGCGATAATCCTAGATCGCTGATTGCACCGGATGTAAAAGTAACGCTTTTTTTTCGTTCGGTCAACAGGGTGCTTGTTCGTTTTTAACTTCGTCTCGATTCTTGTGCACCGAATCTCCTCTGATCCTTTCCTGCCGCCTGTGCTATTTTTT…
ASTF_00007805	XLOC_004231	616	195	0.4232	-0.0705479	0.0217617	1	0	0	CTTGTCCTCTCGTACCGTTTCGGGTAAGTTGCCAACCCACAGATGTCGAGTCTCGCGTACCATTTTCTAGCCTCTGATGCTTCATGGAGGCGGATCTCGTTTGGCGGTATGCTCAACGCGGAAGGACGAATCGATGAATGCGTTAGTATAGTGCCCCGCGAGCTGAGATCGCAACCAAATAAGCTAGTAAGCAAGGGCAGATATTTTGCTTCTTCCGCGTATGATGGTGGGATTTGAGAGGATTTTGGACTCCCTAATGTGATCTTACACCCTTGAGGATATCTTAGTCTTGAGTGGTAGGTTACCTTAGTGGGAAGGAAACAGAGATGAAAGAATGGAATGATGATCCGTTCTTGAAGGTGGGAGGGAAATATGCAAAGAAGTAAAAACGGTGTTGGC…
ASTF_00007806	XLOC_004232	661	105	0.9994	-0.878781	0.00774705	1	0	0	TACAACGTATAAAGAATTTAGGTATAAAATATCGAATCAATATAGAGATTAACAAAAAAGAAAACCAACCATGAAATTAAAGTTCGGTAACGGTTATTAGTTTCAATTTTTCACTTACTACAATATAAAAGAGAAAGTAAAAATGTACATATTTCTTTTGATGCAAAGGTGTATAATGCAATAAACTAAAACGTACCAAACACAAAAACAAAATTACTACACATACACGCACGCGTTCTAAAATATTTGTACAATTTCACAAACAATAAAAACAATGTCGATTTTTACTCAGTGCAATTTAAATTAAACTCTTAATACGTGTGTGTGTATGTACGTGTGTGGTTAGTGTGATACTGTATGTTTAATGTCGTGTTATTACACTAAAAAAACCCATTGTCA…
ASTF_00007807	XLOC_004233	606	174	0.7562	-0.595998	0.0143999	1	0	0	AACGGCATGCCCAAGGGGCAATTGCGATAATTTCACTAACAATCGTGGCTATCTCACAGCACACCAACACTGTCAGGCACATATCACCGATAAATGAATCCGCAATCGCAAAACAGAATTACTTCACATGATTCATGCAACTGTATAACTCATCTAAGTATGATTTTCACTGTAAATGCACTTTTAATAGCAACGACGACACCTACAACAACATGCACTACAGTAAATGAGTCACCTCACAGTTACCAAAATTGCAGAAGGGATTAATCAAAACAACCAATCAAATTTGGTTATTACACTTAATAGACACATATAAAATGGCGACTGACTGTGGGCACTGACTCACATTCAGGGAAAAAGGGTCTAACGACGCTTAACGACGAATTATGCACAGCTATT…
ASTF_00007809	XLOC_004235	558	93	1.1508	-0.817536	0.0144572	1	0	0	CGGTCATAAGGAAGCAGAAATTATGGATAAAGTTTGGCAGCGAGTGGTTCTGAACTGGGGGCGGAAATAGTTATGGCAAAAGTTATAATTAATTGTCGCTGCATTTGGCGCTCGCTTTTGGGCTACTGGGCGGCTGTATTTCGGTAGGTGGACTGCTGTATGTGGTTGCGATAAAAATAATGGTGCCGTCAAAGGTAAGCACTATTTAACCTTGGTTGTGGAAAACTTGGTACTACAGCCTCTAGTGAAGGTCCTGGCGTACCATTTCTGACTTCTTTGATTTGAGTTTACTCGTGTAGCAGGAAAGCTAAGCGGGGAAAAATTCAGCATGGGATTCGAATCACGATTCAGCCGGGGAAGAGCATGGAACTAGTACAACAGTCCTAACGAGAATCAAAT…
ASTF_00007810	XLOC_004236	667	132	0.4377	-0.949275	0.00154908	1	0	0	GAAAAGGTAAATTCACGTCCCGACTTGACGGTGGTTGATCAGCTTGCACTGCACCTGGATCCTACAGCTAATAGTTACTTCTCACCATATTTTGTTTTCACTTTATCTTTACAATTTTGCATACTCACTAAACTCATCAAATAATGCTTACACATACAATACAATCAGTAGGTTTCGCTCTCTCTGCTCTGCCGTTTTTTTCAATCGATAAAAAGCACAGAAATGCAATAACGCAAAGTAACGTAACGTTGTAGTATGTCACCGAATGCTTTGAACGATAAGAGGAAATGCATTAAAAACAAAAACAAACATGGATAACAAACCAAAAACATAGAAAATTAATTATACAAATATAAAACAAAACAAAGGGTAAAGGAAAAAAACAAAACGTAACTTAAA…
ASTF_00007811	XLOC_004237	861	366	0.9789	-0.511515	0.118516	1	0	0	CACAGAGTTTTCCTTCACAATTCGTAGACCGTTTTTCCTCAACTAAACCTTAAAAAACGATCGCTTTCACCCGTGCAATGTCCAACAAGGATATTGAGGGGAACAGTGCGATTGGATTAAACCTGAACAAAAAAACAACGTAAAAAGAAAACACATACACACACAAACAAACAATCATCCCCCGGGTACCGATCATCATCCTCCCTTTGGCGATCGGACACCGCATAATGCAAGGGAACAGGAACTTTGTAGTAGAGGTTTTTGTTCATTTTTTCTTCGTCTTCTTCATCTTGGCCTTCGATTGGCGTGTTTTCGATTGTTTGCTTAAACCAGGAAGTAGATCACAACAAGTTGCAAAAGGGAGAAACGAAAACGGACCAACAACGTTTCACAAAATGG…
ASTF_00007812	XLOC_004238	606	198	0.715	-0.228748	0.0367014	1	0	0	CATTCAGTTTGATTTGAATTTAATTACAAACACGCACACGCACACACACTGTATAGCATTTTCGTTAAGATTATTCGTCGTTTTGTGCTTTTGTTTTAATTTTCAGCACGTTTCTTACACGTCTTTCACCTTAGCCTTCAATTTATACAATTATGCAGCAGTGTTACCGCCCTATCCAAACGCACAAAAATCACGCACGTTTCCGTCGCGTAAATCACGTGGGTAGTGTTGGGTTAGTGGAGTAATCTTTTAGTTCGTTCAAACGATCATATCTCAACCTTTCCTCGGGCGTAACTTTCTTAGCACTATATACGATACATTAGTAGAATTATAGGTCTCATCTTCGTTTTGTTTGAAGATGAGAACAAGCGAGGTGCACAAACTGCTCTGTTTGCCGTG…
ASTF_00007813	XLOC_004239	642	123	0.7013	0.207942	0.0480416	1	0	0	GCCGCTAGCAATCGCAATTCTTTAACTGCCACTTGCGATATCACTCGTTCCATCAACGGCGGTGGATATCGGTGTTGTCCACTGCGCTCGTTTATTGTTGACAGGGTCACAGGATAATAAACAAACGAAAACTGACACATTTCACACCGGTCACGGTTTCGGAGAAGCAAAACACACGCGCTCTCTCTTTATGACCACCGCTAGAGTGGGCATGCTTCGACCACTGCTGACGGAAAGTTTGCTGCCAACCTTCTTCTTTTTCCACCCCGAATCGAACGAACGCACTGACCGACGTCCTAACGCACGCGGTTGAACGCGGTTTGTTGACCATTTTTGCATCCTCTGAGTGAACCATCGGATGACCACTGGACCTGCCACATACACTATCACGCACGCACA…
ASTF_00007814	XLOC_004240	931	252	0.5788	-0.164342	0.0297825	1	0	0	CGCTTTCCTCCGTGCTCGGGAGACCCAAAAAGACCAACAGATCGAAGAGTCGTTCCTTTTTTTCTGATTCCGTTTTTCCTCACTGCAAAAAGTCGCGCCGAAGCTACTTAAAACTCTACTTAGTCACTCTTGCTCAGCAACTCCCGCCGAAGTGTGTATGTGTTTCGTATATATTTTATTATTCCCTCTCACTCGTGCTGGGCTTCTTCCATCTCGGTTTCTCCCTTTCCATTTCCTCATTTTCCTTTACCCATCGTCTCCTTGGTAGCGTATGATTTTTCTCATTTGTGTAAAATTAGAAGCGCGTTTGTTCATTGGCTAATGAGAATCGATCGCGTGAGTGGGTGTGTGTGTGTGTATGAATATTGTACGTGTATAGGTGTATGTACATAATGATAC…
ASTF_00007815	XLOC_004241	754	216	0.872	-0.291865	0.0479646	1	0	0	TCGTCTGACGGCGGGCGTTAGCACCCGGGGGCGCTGATTTGTGGGTGTTGCCAAGTGCGAAAAATTGCAAATATGTATAAGCCAATGGGTTGTACGTGGAGTTTTTCTTCTATTTTTCCGGCCTTTCCGTACGCTGCTCTCCTGCATTTGTCTTCGGTACGGTACAGCACATAAAATCTCATGCCACACTCAGACACACACACACACACACTTCTTCTGGACCACTTGCTCGAGAGGCTTGGCGGTAATGATGCTTTTGCGCACAGGAATTGTTTCGTCCGGCTGGCAGGCAGCATTTAGCGTTCATTACATAAATACTATCCTTGGGCAGTGTTGGCCGAGAGGAGAGTTAATGATAATGAGCTTAATTAATTTCGTTTGCTCACTGCTCCAATCGGT…
ASTF_00007816	XLOC_004242	323	192	0.6279	-0.668119	0.0142142	1	0	0	TTTTTTTTTCCGCAAATATAAAGGTTTGTTTGTTTTATTATAACCGTTTGCTTTGTTTTGTTACTGTTTGTTGATGTTTTTTTTGTTTATCTTTTTTTGGCTGTTGTTGTTGTTGTTGTTGTCTTTTGTATGTTTGTTGTCGTTGTTTGTTTAGCTTACATTGATTGGTTCTGCCGTTCGGTGCTATTGTGCTATGTACTGCATTTTCTACTTCTGCACTGCCATTCTACTGTTTTTCCATTTTCATCTTTCTATGTTTTGTTTTGTTTGCTTCTTCGCTTCGCTTGCTGCTTTTTCTGTGTGTATGTGTTTTTGTTTGTTTT
ASTF_00007817	XLOC_004243	135	75	0.7037	-0.26415	0.0211047	1	0	0	GGTAATTCCACAATGAGAAGGTACCCAAATTAGCGAAATCCTGAACGCCTTGTCGAACATGGAGCCAAGCAATTCTATGATTTTAATGACAAGGAAATCCTGGCTCTTAACAGCCTTCGGGGATCGTAGTGCTTC
ASTF_00007855	XLOC_004266	524	54	1.0213	-0.0760683	0.0409813	3	0	0	CAGAAACCGGTGCGGTGATAAGTGTCGTGCTGTTTGGTGTTTTACTGTCACAGCTCGGACCGTGCAGTGCGTTCCTTACCGTGCAACACGTCATTACGGAGCGTATCTCCAACCAGACGGAATTCGTTAGCAACGTTCTAAGTGATGAATTACCGCTAAGAATTGTGGAGCTTTCGCAGTACGTGTACGATTGGGATTACGATACGCTGAAAGTGAAAGGAAAGTGGGTTCTAAGTTCGCCCCACGACGATTACCTGTACCATGTGGAATATGCCCAAAAAGTCGACAAAAGAACAGGCTTCAAGGAAGTTCTGAGCGATCTCTACTCGAAGAAGCTCATCACCGATATCCGGCGAGTCGAGCGTGTGAAACCACAAGCGTACCGCTTTGAAAAGACGA…
ASTF_00007905	XLOC_004294	488	162	0.4833	-1.16992	0.00174785	1	0	0	AGTTTTGATGTTTGTTATGTTGTAATATTATGCATACAGTTACGATAGACATCCGCCAGGATTTCCCGAGGAACCGTGTTGACACCTTTGCACACAGCGGGGTTATCTGGTTATCCATTTACTTTTCAATATATTCACGAATAGTATTTCATATAAGAGCTGGGAACGGGGATTAGTGAAAAAAGAACATTAAGCAATTAGCAAAACAAAGCACAAGAAACAGTCTAGTTTAATGCAAAGACACGCAAAGCAAGTTAGCAACATAAAACAACAAACAAACAAACCAACAAAAAAAAACAACAAAAAACACAAAACAACAACTGGAAAAGTGATAAGATAACATTTAGACATTTAGCTAAAACCAACCAATTTAGGGCGTAGGTTAACTTAAGCTAATTC…
ASTF_00007953	XLOC_004317	712	324	0.6904	0.0460722	0.151947	3	0	0	TTATTGTGAAAATGTTCACGAAAGGGGGTGGTTGTGATATATTTTGAGGATTGAAGTGAGACTGTGTGCACTCGTATCGCTGGTCGGTTTGCAACTGTGTATTCGTTTGTCCATAATGATTTACATGTAATTCGAGTAGTTCGTGACGGCTGCTTTACCGGAACAATATTTGGCCCGGGCTTGTAACTGTTGCAGATACTCCGGATACCATCGGGCCCAAATCGATTGGAGATGTTTTTGTACCAATTGGTATTCCTTCAGGTGATTGCTCGGCGTATTGGTGTAATCGATGTCTGGTACCGCTTGCATATTGCCACCGACAAGGAAGTGGCCCGGTGTCAGTGGTTCTAAATCACACGGCTCATCGGATAAAGGTGTTATTGGCCGTGAATTTAAACA…
ASTF_00007954	XLOC_004318	334	117	0.6764	-0.628257	0.00921335	1	0	0	ATATGTAAAACAGGACACAGCCACAGAAAAAAACTTTACTCCGTGTAGACCTTCCACTACGGATGACACACTATTCAACAAATCAAATGCAAATCATACCGCAATGCCAAAACGCGCATGAGATAAAAGCATGATGAGAGAAAGGAACCCAGCACAGAACAAAAAAAGATAACTGGGATTTACTAAGGTGCGCAAAAAATCAAGAAACATAACAGGATTGATGAAACATTTGTCAAAAAATGAATCGTAAACATAGAGGAAAACAAAAGCCGAACTACAACCGCACGTGGGCACAAAGACCCGCGAGAAAAGACAGCGAACCCTTATTGTGTAA
ASTF_00007955	XLOC_004319	1510	201	0.927	-0.799016	0.00560991	1	0	0	ACCCAGAGTAAGTAATGTTACTATTTGTGAAGATTCTTTATTTACTCGAGAATGCGGATTGAGTTCTAGTGCAGGTGCGTATAGATTAAATAGGTTAAAGAGAGTATCCTTCCTATCCTTCGATGTCCTGTCAAACTTCGATGCAACGTGATCGGTGAATCCTGCTCAATCCTGATCGCGAGCCCATAAAAAAGACAACCTCCCTTTTACTGCTTCGTGAGCGAAAAAGGGCCGAGCGTATTATGTAAATGTTTAGATTAAAGATGCAAACACTCACACAAAGAAACCCTAAGACAGAAGACACTGATACTAGCAAGCGACGCTCGAACTAGAAAGGGGACCGTCGCATCGCTGCTGCAGCTGTTTCCGTGTAGTATAAGCCATCGTACGAGAGTGCCG…
ASTF_00007956	XLOC_004320	1301	207	0.6121	-0.193151	0.0127468	1	0	0	CGTCGTCGTTTGATGAGGTGAAGTTCGGCTCGGTTGATAGGAACATGTTCCGCTCTCCATATCGGTTCGCAAGCAACAGGCCGATACCGAACGGTTTTTGCAGCTTAACCAAGACACGACAGCCGACAGCGGATTGACTTCCGCAGTGCCTGTTCCGGTTGCGGTTTTCTTCACGTTCAGCGCGCTTCATCTTCGCTCGCAAAACCTTCAGGCTTTCGGACGAGTGGCCCACATTGATTAGAGCACAGGAAAAACCTCTGTGTGGTGGGGAAGGGAGGGATAACGAAAACTTCTTGCAAGCTTCGCCCAATATTCCAGAGACCCTCGCTCATCAGAGCAACAGCTCCCATGGGTGGTCTTCATTCCGTTGAAGGCGAGCAAACAAAACAGGACCAAACA…
ASTF_00007957	XLOC_004321	659	279	1.1478	-8.75956e-05	0.312746	1	0	0	GCAGAGAGCAGGACGGCGTTGGTATTCTTCGCGAGGTTTGGGGCTGGCGAACGGATTCCTCCAGCTGTGTACTGCAATTGTGGCGCGCTGGCTGGACATTACTTTTATCGTGCTGCATGGAAATAACCGTCCTCCAAACGAGCGTCCTATTCAACGGCGGACCGGTCAGTGGCATAATTGGGAAAATGGGAACTTTATGACGGTGCGGCATTTGGAGTCGTAAAAACAAATCGGGAGGAAAAATTATTCCGACGAGGGTTCCTTTTTTACTCAACCACATTTTTCTGTGAACTCGAATGAACTTACAAAGCTGGGTTTAAAGTTGCGACTTACATGCTAAACTCCACACAGTTTAAAGACTTCAGCAATCGTTCATTCGAAGGTGTTGATTGCACCCGA…
ASTF_00007984	XLOC_004336	461	69	0.4835	-0.127105	0.0093397	2	0	0	CGAAGGGAGAGTATTTAGAGCCGGTCCGATGGTACGGATGGGCCTTTCGTGATCTACCGTCAAGTCGGTGCGCCAATTCAATTAGAGATGCTCGACCTATTTTGTGACCCAGTTTAGACAACTGAAGACTCCATCACACCGCGTAGACACGCTACCACCGTTCAGAACTATCGAGTTCAATTGACTTCCAGCAAACGGCTAGGTCAGCGTCTAGGATCATCTAATGATGGGGACCCATTTAAAGACGTCTTGCAAAAATATATTGAAAGCTAACAGGAGAAGAGGCCCTTTGTTGACTTTTGCTCAATATTCCAACGCCATCTACTCGGGAGGATCAATATTGACTCATGCAACCTAGCGCATCGGTGCAACCATCCACAACGGCCTAAGGTCAAGTGG…
ASTF_00007988	XLOC_004340	760	171	0.7642	0.14874	0.0645623	2	0	0	GAGAGTCGGCGTCGGCGAACAGTGGACGAGTGCGGGTTTCTTGATGACAACACGTCGCCGTTGTGATTCTGGCCACGCGCAAGAGATAGTGTGATAGACGACGGCGACAAAGACGACGAAACACATTCGGTCTGGTGTGTGGTGCTACATCCCAGCAGCACTGGCAGCATCATCTCGCCGCAACTTGCCACACATTAAGGCTAAACCCGTAACGAAGCGATAGCGCAAGATGGACGGGATTGGCAACGGTCAAACAAGCGCTCCAAATTCGCAAGTGCAGTGCCACTGACCAACAGGAACGCACACGCCAGTGACAGAGAGTGAAAGTTGTGCGATGCGTTCTTAAATCATTCGTTAGTGCAAACAAAGAATCGTAGCAGTAGCAGTCAACGACATTTG…
ASTF_00007992	XLOC_004343	699	102	0.6258	-0.667111	0.00388579	1	0	0	AAAAAAAAACCAAAACCCCCCGCACCGAATAAAATCGATCCACAAAAGTCGGGGAAAAGAATTGGCGCGCACAGCAGGTAGAGTCTTGAGAGGAGTTACAGACCCGCAACATAGGAGAGAGAGAGAGAGTTATTTGGAAAGCTAAAACAACCTGTGTATATGAAAAATAAATCCGTTTGCTGCTGCAGAATGCCTTAAAACAAACAAAGAACCAAACAAACAACGAAAAAAACAAAGCATTGCACGTTCGTCGACTGCGCTGTATGCGCGCGGGCATGCATTTCGATCCTTCTTTTCCTTCTTTCTTTCTTGCTGCTTTTATGTGTTTCTTTCTGCTTTTATTTAGTGTTAAGCGTTTAGTTTAAGCATGGAATTAGTTGTTTCATAATGTTGCTTATT…
ASTF_00007993	XLOC_004344	953	321	0.865	0.0348764	0.171405	1	0	0	ATGACACATACCTTCAGTTGTACTGGTTGTGAGACTGAAGGGAATGAGGACTTCCGGTCGGTCGCTCTCACTCTTACGAATCCGGTACCAGACAGTGTGTTGTGCCAATATCTGTGCGGTGTCGATCTTGATCCAGAAAAGTGTAATGGGTTGGAGAGTTCCCTCATTGTGGATGTCATTGGAATATTCATTAACCTCCATCATCATTGTGTCCCCATCATCATTAGTGGGACAGCAGCTGGAGGTAGGAAGTTGTCGGGATGCGGGTCAAGCAGCTGTCAACTGACCGGCGGGACCGAAGGTCAGTTAGCAGCAGGATAAAATGAATTAAGACAGGAATTAATTTAGTCACCCATGTGTAAAAGTGGAGATAAATCTTCTTCATCCTGGGCGGAAGTG…
ASTF_00007994	XLOC_004345	660	219	0.6643	-0.243855	0.0341539	1	0	0	GAGTCTTTGTCGAGTCAACCGAATGGCATTTGAACACTCCAATCTTATGTCAATTACAGATTAAGCCCTAATCAGTTCGGAACGACTCCGGCTCTTCGCCGCTCACTATCATCACAAACCGGAAGCATGAAAAGGGCGTCGAATGAGAATATTATACTGCAAGCATTTCGAGAACACCCTTGGATGACTAAAAGGGTTCCACCAAGCATCCACCGACGTGGGGTCTGGCATAAATGGCATAGCAGAAACCTTGCCCGACCGTACCTCAGGAACCAATATGCAGGCCAAGGTAGCTGCGGTACCTTGGCTCAAGCTCAAGCCACCTCCTCCAGACTAATTGCATAACGAACGATGGCCGGGAGAATAGTTGGCGAACCAGTCTTCTCCGGTTGCGGTGTC…
ASTF_00008000	XLOC_004351	384	54	0.536	-1.31236	0.000647417	1	0	0	ACATCACGATGCACAAAACACGGCGGTACAGTAACAGCCTAACGAGTAACGATTAACAATAAGGAGAGGCAACAATCACATCACATTTTTACAATAACCGAGAGGAGGATCACACAAGGAGAACAATCGCTTAAAATATCTTGTTGTAGCCATGTTGTTAGGAGCTTCTATCATATTTACAGAAAGATATAAAAAAACACATTAAGACAACGCGTCAAATCTTTTGAATATTAGAACGTTTACAACGGAACGCAAACGTTCGAGGGTTTCTAAACAAATCAAACATGTGATATTAGGTGCATAAGATCTTTACAAAGAACCCATCATCCCCTTGCTACCAGTGTACGCACGATTTGCTGTGTTGCTTTCGTGCAGGATTTTCCT
ASTF_00008039	XLOC_004371	389	93	0.679	-0.634211	0.0068909	1	0	0	TTTATTCAGTTTATGTTAGGTGGAAAACTATACTCCTGCAACTAAGCTTAAAGTTTGGCTCTCTTGCTTTTATTTAAATCAAACTCTGATTTGAGCGTCTTTTAGCTTCTGTAGATCACACTGTTACTTATGAAAACACTAACCACTAGTGTTATGCTGCTACATTTTTGATAGAAACTAATGCAAATTGTGCGTAACCAAATAACGATTAAAACACGAGACATGGCAAAAAAAAAAGAACTATTACGCTGACCGATAATGCCCGAGTTCTTAACACAAATACACACACACACACTTACACAAGGAAAAAGAGAAATCAAAAGCAAACAGGAGTTTACAGAAAACCAGTAAAGACAACATCGCAAAAGGACAGAAACTGTCGTATGAAA
ASTF_00008069	XLOC_004387	2050	168	0.8698	-0.660112	0.00237447	1	0	0	CACCTCAGAATATAGTAAAAACTTGTGCAATTTATAACGACATTATGGCATTAGTTTCGCTTAACCCCCGGCAAAGAGAGATACAACACATGTTAAAAATAATAGAACAATGTACAACATAATGCATAATACACGGGCAAAACATTGCTTACCACTGCTGCTGTGGGCTGCCATGTTCCGATGTGCTCATGAACTACTCTGCCTATAACCTTATGAGCAATTTAAATCTTAGTGTGTAAATGTAACGATGCGTAACATGGTGGTGCGTAGTGTAGAAAGGAAGGAAGAAAGCAAGGTAGGAGTACCGCGGGTAGGATTTGATTAGCCACAAAATAAAGTTTGGGCGTCTGCGGGGACAAAGATGAATGAACGATTGCCGAGTATTATTAACTTACCGCA…
ASTF_00008099	XLOC_004403	862	339	0.7095	-0.0207773	0.131196	2	0	0	GTGTGAAAAATGTGTTGAAAAGAATTTACGTCACCACGGTTACGGTTGTACGGTGGCGTGTTTTGACAAAACGGTGTGCGCGCAATGCCACCTTGACGGGCAAGGGTCGAACGTGCCAACTGAGGCAAAAATAAATACGTAGAACCGTGTGGGAAGCCAAGAAGCAAACGGGCAAGCAGAAAATCTACATACCAGGGCGCATCGTTGCTACAGGAAGGTCGAGACAGACGGGAAGTTTCTTCGGTGGTTTTGTGGATGTGGAGGGCTGGAATGTCTACTCCGCCATTACTAAGAATCGTCCCCCTTGTACGGAGCCATTCTCCCTTTGCCTGCGAGGACCAGCACCCTTTGTGACTCGTTAGACTGCAAAGCAACCGCATCGGCAACGCGATAGAAGCT…
ASTF_00008114	XLOC_004411	1609	198	0.981	0.0851367	0.0438102	1	0	0	TGATCGTGCGGCCATCGTGCGCTGTTTGGCAGCCTTTTATCGCTGATGCCACAGTCAGGCAAAGTGTCGTCATGTTTCCTTCCCTCTGGTCCTGTCACTTATCGGACAGGGAAAAACCGGCTACTATCGTGCACACCGTCCCCAACTTCTTACCGGCCACCCCAAGAACCGGATGGATTAAGGCAGTGATCGGAGCCAACGCTAGCGCCATCAGTGGAGTAGCACCGAACCGAACCAGTGTCTGGCGCTTGTGCGAATCGTGCCGATAATTGTAAGCTCTTTGTTTATTGTGTGTTTTTCTCTCTCTCTCTCTCTCTCTCTCTCTCTCTCTCTCTCTCTCTCTATCGCTCTTTCTCTCTAGCACACGATTTCCGATCAATTAATCACACCAGTCCACGT…
ASTF_00008122	XLOC_004418	2492	282	0.8101	-0.212624	0.00859147	2	0	0	CAAAGTGAACGTGGAACACGGTCGCGCGTGCACCCACTGCTCCGTTGTTGTCCGTCGCGTTTTGTTGTGTCGGTCGTGGTTGTATTGAGTGAGAAAGAGATAGAGAGAAGGGCGAAAGTGTGTAGCAAAACAATGGAAATCCTTCCAGCGCGTTTAGCGTGACACGGCCCGTGACAACATCATTCTACACGCACACACACGTACACAGGCGTCCGTTTTAGGACGTTCTTTATTGTTCTGGTGTGCAGTCTCCAGTGCGGTGAACTGCTTTGTGCGGTCGTGAAAGGTGGTCGTTATTGTGTGGATTGTGTCAATCTTCACAGATGTGTTAGTGGTGGCCGTCCCTATTGTGTTTGAAGAAGGAAAGCTGAAGCTCGGCTTGTGTTTCCTCCCGTGACG…
ASTF_00008138	XLOC_004425	620	297	1.063	-0.0484764	0.280168	1	0	0	TCCGTAGTTGGTTAACAGTCCTGTAAGATGCTTGTAATTGATCTGCTTCGCTTCAAAACCTTTATCAATCAAGCACGGTATCATGTACAGGCATCCATCCTGAACGATCGTGTCCAACAATGTTTGTCCATCTTGATCGACATGGTACAGATCGATCATCCTGTTGAGAAGACATTTGAACGCTGGTATGGATTTGTTATGGCTGGACCGTTTGAAAAATGGTAGCAATTTTATAAGCTTCATAATTAATGCTTTAGTAACGTCCATTTTCAGCTTTTGAAGCACGTAACTAATCATACTAACGCTCCCGACGTCCAGCACTTTTGCCAAGAAACATTCCGCATCGTATTGATCGTATTTGTCAAATAATTTGAATTGTTCACCGTATTCATACCCTTT…
ASTF_00008193	XLOC_004448	915	354	0.7846	-0.263416	0.101633	1	0	0	TGCTGTAGCGCTGTCGGTTTGCCTGGAGTGGAGATTAAACCAACCCCCCCCCCGGAAATCTTAAAAGCTTTTCCAGAAAGAAGCTGTGGTGCAAATTTGTTTTCGTGTCGTGCGTCTGACCGACTGTAACGAGTGCGTGCGATTGGAAGTGTTGCCGTTTTCCCCAGCGAAACGGCAGTAACGCGCGGGTTACCTTTACGCGTCCCCGTGCCAAATCCCGTTCTGCACGGGCGAAACCTCGAGAAAGCGAACGGGAGGGTGTAGGCGTTAAGAGGAGGAGGAGGATAAAATGAAGTAAGAGCCTGTGCGAGTGTTGTGCATATGACGCGAGTAACGCAAATTGTCGGCGAAAGGTTATTAAAGGATGCGCTTCCGGGAGGCAAATCATTGCCGCGGTTG…
ASTF_00008194	XLOC_004449	856	501	0.4973	-0.62661	0.0745604	1	0	0	TTTTTTTCGTTTTTCTGTATCGTTTTTAGTCGATAATTTTCTGTGCTTCTTTCAAGAAAATATACACATAGCATGTACCAAGTGTGGGTGTGTGTGTGTGCGTTTTTTTTTCGTGTTGTAAGCTGCATCTAGCTGTGCCGGATACGGGCACGAGAATATGGGGGATCGGACGGTTAGGTATTTAGTGCTATAAACAAAAAAAACAAAATAAACCCCTTTTTGTAAATTTATATCAGCCAGAATATGTTAAATGTACGCTGAGATTCTTCATACGGTTAGTCAGACACTAAGTGGGGGTACTGGGAAGGATTAGGACGTCGTTAGTACGATTGGTGTGAAGGGACATCGTGTTGGGCAGTGGAGGTGATCGGTGGGAAGGTTGCGGAAATTTCTTGTTTC…
ASTF_00008206	XLOC_004453	1251	321	0.5552	-0.117861	0.0367564	4	0	0	GTTTGTGTAGAGTTTGCCGCGTACCAAGCGGTTTGAAATCAAATTGGAGAGTTTGCCTGTTTGCCCTTCGCGCGCTGTACATCGCGGGTGACACATAAACGGTGCATTTCCCCGCGGAAGAACTGCTGAAGTTGTTCCCGGTTTCTGGCGCTCAAGCGTGATTGTGCTGAAGTGAGAAGCCACAAGAACACAACCTATCACGTACTGTTTGAGGCGCGCCGGAAACCTGCGCATCGTACAAATGTCAACCCAATTCAAAGCCGAGCAACAAAACAAGCTACGCCGCTCCCTACCTGGCCAGCGGAAGGAACAAAACATCATGAAGATGAAGTCTGATAAACTAACCGGCAGGCAGCGGATGCCGAAACGGAACACCGTTGGTATGCCGAACGAGACCGC…
ASTF_00008231	XLOC_004466	869	66	0.5859	-0.250785	0.00533542	1	0	0	AACTCCGGGTCGTTCGGTAGTGTCGTACGACCCATCGCTAATGCCAACGTGGTGTGAATAGATATTCGATCGAAAGAGTATGATAAAGTGATAAAGCAAAAGATGGAACGGGAGAAAGCGCGGAATGTAACAATCGAAACAATTGCAACGTTAAATAAAGTAAATACACACTTATTAACACTTACTAATCCGCATACCGATTGATTCTACTAGCAGCGAATTTGGAAATGCAACAGACAGGATCCACAGTCAAGCCAGCTTGAGATGGGATACGATTGAGTTAGGACGATAGCGTAATATGCACATTACACTCATACAGAAGTTGTCACCTTGTTTGGATAGTCCATCCCATTGAATGTCTTTTGGAAAACCCACGCACACACACACACAATTAGATGA…
ASTF_00008232	XLOC_004467	2466	306	0.4577	-0.602915	0.00153328	1	0	0	CTTCTACGAAAGTAAACATCCTCGTACCTTGTAGCGAAATGTTAAATAAGATAATTCATTCCAAATGCTATTTCTTTGTTTTTTGGCATTCGTCGGGCTTTGGTTAAGTGATGTTGTTTTTTCATTTATTTATTCCGTTCCCACGGTTGTTCAATAGCATCGAGAGGGATTTTCTCCTGCTATCCAATAATTGGGAAATGAACGAACGTGTCGGATGCACAAATCAAGAAGAGTGACCGCACTCTCTCTCTCTTTCTCTATCGTTTTGCAACGTGATCGATTTTATAAACACTTTTTGCTGCTTGCCTTGGACTGATCGAAACGATTGGCATTAAGTGAACTCTGTAGCCTATATTGCTGTCCAATCCGGAAGAGAAGACTTGTGCGGTAAGAATTAAT…
ASTF_00008254	XLOC_004474	616	141	0.5235	-0.482049	0.00698212	1	0	0	TCCCAATTCGTTCAGTTGCCTTTTTGATTTATCGAAGAATGCTTTGACAAATTTTGCTTCGTCAATTGACAATTGTAGGCGTGCTTTGGTGCATATTGCGTGGTGTAGGTTTTGTTGTTTATAAAAGTGCATTTTTGACTTAATTAACTATGATCTTGTTTTTCAATTGGTTGTAGTGAAATGTCACACGAAAATTACGCACGTTACTGGAAAAAGAGTGGCATTTTGTATAGAAGGAAAAGGCAATTAGCAGCACTCAGAGAACAGTGCGATTCTGTCGGAGTGTCAACCTTTGACCACACTGTTCATGGGAAGTTTTAGTCCTTCTTCTATTTGTCCTCTAGGATGAGATGAAATTGTGATTCATGTGCTGATATTCTCATTAATTTTAGATGCGGT…
ASTF_00008255	XLOC_004475	197	36	0.8072	-0.747381	0.00605957	1	0	0	ACGTTTCAAAACTCAGCTGAAAAATTTCGGGACCGTGAATGAAACATTTCACATTTATGGTTTGTTTGTTATAATTATGGCACGCTTTTTTTTCATCCACGAAGTCTGTTAATTACTGCTGTAAGTGTACATATAAGTCTACATATACGACTCCGTATATAGGTCGTAGTAAGGTCGGATATCGCTTTTTGGTTATG
ASTF_00008256	XLOC_004476	693	183	0.6993	-0.145556	0.0333226	1	0	0	CGGTCAAACGGGTGCAGTTCCCGGTTGACGGTCGGTCGTCGGTAGGCTTAACAGTGCGCAGGACGGGCAAATCCGCACAGGGTGGATTAGGATAGTGAAGAATCCTGAATGTTAACCTCACGTGATCCGGCGGTTGATCACGCAGCAAGAACCGATCTCAGGGAGATCGGGCAGAGGGGTGTGTAACGCGAACGAGACAGGCTTACTGCGTTCGTGGCGTGTTCCAGCGGTGGCTGCCTGTTGGCGAGATAAGGTCAGAGCGAAACTCTGTTGCTGCTGCTGCTGGTGCGAGTGGTCGGCGATCGGCGGAGGTCATTCGAGCATTGTGCCTCGTAGAAGAACGTTTCGGATTTGTGGTGAATGTGACTTTGGGACAAGGGTAAATTCGCACACCGACCG…
ASTF_00008259	XLOC_004479	262	90	0.6718	-0.245216	0.0193351	1	0	0	TGCTAATGTTTGGGACCTAACTAAAAAACAATATAGTGCTTGCGTGTGGGAAATAGGTTTTGGATAGCTTTCTGCCCCGATGTGAGGTTATCTCTCTCGTCGCAGTGACGAGATAGCGGTAAAAACATTGCATCTCAGGCGAACGAAGTGCCCTCGCGGGTGTGCATAAGATGGGAAGAAGGCATGGGTTCTTGTATGGCCTCCTCCTTCCCGTGTGTACGCATTTCAACAATGACCGATACGGATTGTGGCCTGATCATCC
ASTF_00008260	XLOC_004480	264	135	1.1441	-0.365137	0.0829672	1	0	0	ATGATGTATCTGTTAGCGTCCCTAGAGTCCCTAGATAGCGTGTTACTGGATTTGAGATGGACTACAAATACAATCACGTTAATACTGACTTGTTGGAAGGGAATAACCAAAACGCAACCAATGCCTTTACTTTAGTGTAGCTATCCAATATTCCATACTCAAAATGACAAAGTGACTAGTACAAGTGACTAAGCATCCCAAATATTTTTGAGGAAGTGGTCCCGAGTTACCCCAGCATTTACTATCCAGCTGCGAGAAAATTAA
ASTF_00008261	XLOC_004481	644	183	0.4579	-0.135293	0.0180033	1	0	0	CGGGGCCGTGTATTTATTTTTTCAGTTTGTTTTTCTTTGTCTTTCAACGCGAGTGGGTTGCGTGCGTGAGCAACGTCCGAGGAAAGTTCACTGATGGAGCTCTGCAATTGAAGGCATCCTCCGAATCCTCTACAACCTGTGCTGCTATTTGTGTGTGCTTAACTGAATCGGAAAATTCGGGCCCGACTCATCATGCTACAATTCGTGGGCCGTTCAGCGTGAAAAGTGTTCAACGGTAGAAAATGGATGCAGTGGCAGCGTCCTGCAGCAAGCATCTCTCAATCGACCGTAGCCTGCCGTGATTTGCCGTTGCTACACTCATGCTGTGATGCTTTTTTTCGACGGCCCATGAAAAAAGCCATTAGCCCTGAAAGCCTTGGGGTTTTGCCCTTAGATCAG…
ASTF_00008267	XLOC_004486	418	111	0.8032	-0.707586	0.00944344	1	0	0	GCCGCGACCCCATCCGGTCGGGGTGGGAAAGAATTGGAATCCATCCAGGCCCGTCGTACAACCGTACATAAGTGTGTATATTCATCTCTATTATAAAAATCGGTGTCACACACCGCAGTACAACACGCTGTTCGTTTATATACATCAAGAGCAAACTGTTATTTGCCGTTCTTAGGTACACATACACACAGAAAACCCCCCTTTACCACAACGGCGCAGGTTGAACACTAGTGAATGTAAAATAAAAATTAGTAACAAACAAAAACAAACTGTTTTCTTCTTCTACCACCTGTAAGGTGGTCATTGTATGCAGGGCAAATTGTGGCAAAAAAGGATAAATTCTTTCACCAATTTACACACACACACAAAATTGTTGCGAGAAGAAAAAAAGGAAGGAAG…
ASTF_00008268	XLOC_004487	321	66	0.5343	-0.896926	0.00208219	1	0	0	TATCGCTTGTATATAGAAAATATACAATCTATTAAGAAGTTATTATATATTTGAACGTAATTATTATTGTACCATTCAAAAGCAACAGTCTGAACATCACAAAAGAACCGTACAGAAGGAGAAGGAGGAATAATAGTACAGCGCAGTAACAAATCAAACGAAAACAATAGGTCAAATGGAAAAAAAAACAATCCGTGCAGGAAGGAAGAGAAAACAACACACAAACTGTATGTACTTTTGAGCAATGAAACGCAAAGCAGTAAATTCACAACTGTGTCAAACAACAAATGGATGAGAAATGGAACAAAAATGTTAATAAAC
ASTF_00008359	XLOC_004535	531	225	1.1772	0.232841	0.388732	2	0	0	GCCCACAACATATCGCCGCATCATTTAATCAACCGATGCACCGGAGAGTCTCCATCGCTGCAAACGAGCACACTGAACTGCTTGAGTTCCTATAAAAAGCACATCCAATGCTTGCTGGCAAGAATAGTTTTCCAGCGATCCAGTGTGTGCCAACATGCATAGCAAGACATTAATCGTGATACTGCTCACCGTGTTTGTTATCTCCCAGTCGATGGGGAGTGAAGTTAACCCGGATCAGTTTAATGGTGTAGTGGCCGAACCGACCGAGATCGATACGGTCACGGGGCAACGGTGCTGCCCGAAGGTGATGAAACCGATCATACCCACCGCCAAACCAAAGATCAAATACATTGTAGTGCCACCGGAGAGTATAACGTGAAGCAAGTGGCCAGCAGTTAC…
ASTF_00008366	XLOC_004540	174	42	0.9666	0.0982425	0.073285	2	0	0	CCGGACGTACGAACGAGCCAGCAACAATCATAGTACGGGCAACCGATCGGGTGATTACAGCCGATACAATCCCTCAGATAGTAAAGACATCTACTGCACTATCTGCCTGGAGAAGATACAGCCCGCGGTCCGATGGTGCCTCCCCTGTGGGCACTCCTTCCATGTGGAATGTCT
ASTF_00008395	XLOC_004554	491	135	1.0552	-0.614269	0.0275236	1	0	0	GGTACAACTAAAGAAAAAAAAACCTACTCATAATCGTTGTTAATGGGTTAATGGGAGCCTCCATCCGGTTGGTTGGAAGAGGAAAAAGACATACGGGCAATCGATACATATCGTGCATATACATAAATACTAGCATATACATACACTGTTAAATACTGTCGATACAGGCAAGGTCAGAGAGTTCTATCCCGAAAGAAACGAACCACGAAAACAAGACAGCAACACTGTACAATTAGAGCATTAGGGTGAAACCGAACCAAAGCGTTTAGAAACCTACGACACACGCGCTTGAGGTACGAGCAGAGCAGATGAGATCATAGAACTGGTCACTGTATTAAGTTGGAGTGGGAAGAAAGGAAAAAAAAAACAACTCATACATATCAACTGATATCCGAGAGC…
ASTF_00008454	XLOC_004587	850	165	0.7064	-0.630389	0.00765016	1	0	0	TTTTTTTAAAGGGGTAGTTCTTGAACGTGAATTTCCATTGATATGTTTCGTGTGTGTTTTTTTAATTGCAATGGTGTGCTGGTTTGGTTGTTGTTACTGCCACTACTACTTTGCATGGGGGATTGTGCAAAAACCGTACAAATGTTGCAAACACAAATAAAACAACAACGGAGGCCTCTGGGTTGGTCATCGGATAGTGTTGCTTGATGTGGGGATTTTCCTTTGGTTTTTTTTGTTGTTGTTGCTACAATATTAATTAATATATTCATTCATCATCGCCTCCCACCCCGGTCGGTTCGATACTGTTCCGCGAATTTTGAACGAAAACCATCTCTCTGTTCTCGAATTTCATCATATCTGGTTCTATATAATGCATAAGTTTCATTTGTTTCACTATAT…
ASTF_00008455	XLOC_004588	6629	549	0.4332	-0.636186	4.09869e-05	1	0	0	CCAGTAAACAATGTATTTCTCTATTCGATAGATTTTCTTTTTGTTCCCACCAAAACCCCAACCGCAAATCGAGACTAAAAACACCTGTCTGTGAAATTGTATCCGGTCTCTATGGTTTGAGTTTTTAAACTTGCTAGCAGTATTTATTTGTAACTTTTTTTTAAACCGTGTATTGCTTTGTTGTTGTTGCAAGCGGTGGTGAAGGTTCTACGCTTCTCACTGTGAATGATTGATAATATTTACCTTTATGTAGGTATATAGTAAGTCATTCAAAGAGAACCATTTGTCTTGCTGTGGAAAGCGTGGAGAAGCCTGTATCGCCCGTACAAAGGCTCAACTGACAATTCAACGCAACAACTATATTTGATACATTTTTTTTAAATGATAGTCTCTATTCCT…
ASTF_00008456	XLOC_004589	858	198	0.6931	-1.04134	0.00369516	1	0	0	GCCTGGTACTTCAAGTGAATGGAAGCATGATGGAGACGCCTGGTGCTTGAAGGGAACGGAAGGAAAAAAAAACGTTATTTTACGACGTAACTTGTGTGGATGGATTCAAAGAAAACGAAACGATGGGAAAAAGAAGTCTTAACGAAGCGAGAAAGCCAAAGAACAAAAAAGCGCCGCCGGTTGGCAGCAAAAGCACATGAAAAGATTAAAACCCAACCAACCATACAAACGTGTGCGAACGTGTGTGTTTGTGTGTGTTGAGTGTGCATGCGTGTGTATGTGTGTGTGTGTGTAAATGAATGTTACAAAACGGAATCCATACTGGCAGTAGCTAATCTTCGATTGAAAGCAATAATAATTTATATTACAAATTACAGAACAAAAGTAAAAGTATTACAC…
ASTF_00008457	XLOC_004590	527	141	0.7836	-0.435367	0.0189103	1	0	0	CGTTCTTCATTCTACCTTGTCTCGATTGTTCCCTCGCGTTAACGTTTGTTCGCGGCAGACGGCAGAATGGCTGGACGGACGTATGCACTAAAATACCAACACCAGCCTAGGGCGCGGCGCGTATTTACTCACGTCTTTTACGCTTTTGCTCCAGATTCTTATCCCAGTTTTCCCACCAAAATTGAATATTTTTCTAGGAGTAAATAGAATGGAAGGGTAGAACTATTGTAGCGCAATATGCGGAGACACTGCAGCAAAGTGAGCCTAAAGACGTCTCACTCATCTCCCCTCACTAAACAGTGTGTGTTTGTGTGTGTGTGTGTGTTGGCGGCATAAGAAAAAAAGGAAAAAAAAACTATCAGGGTGTATTTTTGTAATCTGTTACTGGTAGTGCTGTCA…
ASTF_00008458	XLOC_004591	266	78	0.5882	-0.575733	0.00624136	1	0	0	AAAGAAACAACAACAACAGAACGCCGGAGTGTGCACAGAAGAGGGGAAGAAAATGTAACGCGGAAAGCATGCTACAATCTTATACACACAAAGGAAAAGCGAAAGAAAAGAAAAGGCCCAAAACAGCGAAGAGCAGCACACAGTAGAAAGAGGGTTTGCTTCCTCCCTCGAATAGTAACGAGGGGCGCTAGAAATGAAGAATAAGAGAAGGAAAAAACAAAACAAAAAGACATTATATATACATCAAATATACATTTTTACTGCTT
ASTF_00008459	XLOC_004592	368	177	0.4981	-0.570777	0.0100481	1	0	0	AGATCAAGTAAGCCACGAAAAAAAAATACAAACAAGAAAAAAGAATGTTTATTGAAGAGAACAAAAAAGGAAAAACAAAACCAGAAAGAGAAAACAATGAAAATGGCAGCAAAATCGAATCGACCTCCGTGCAAGAGTGCAGGAGAGTGGCCATGGGTTTTAAGGAACGAAAATGAAAAAGGAAAGCCACACAAGCAAGCAAAAAAAAAGAAGACACAACATAACGCAATATTCGTGATAAACATACATATATTTCACTGTTTTTATTTGTGAAATTTGTGGTTCTTTTTCCTCAAATAATAAAACAAGCAAACAAACAAACAAAGAAGGAAGAAAAAAAACGGAAACAACAAACGCAAACAAAACAA
ASTF_00008460	XLOC_004593	2138	351	0.6453	-0.703736	0.0048893	1	0	0	GCTCGTCACATTTCTCTTCAGTTTCGTTCACTTTTTTTTGCTTCCATATTGTTTATTACCACTCGACCAGTTTCTTCCCACCGGTTTGTTTTTCCACATTTTCATCAGTTCATCGTTACGGCGTGCATTTTCACTATGCAACTCTAATGCTCTCTGTCTCTCTCGTTCGCACGGCAAGAGATAATGGCTTCTGTACACTACCTAACGCTTCAGCATCGATTCTTCCTTTCCTTTGTTTTGCTTTACTTGTGCTGTTATCATTTCCTCTTGCAAGTCTTATCAATAGGGAGAAAGAGAGAGCGCGCTCTCGAGTGAATGCAATCGTTTTGCTTATGGATTTATGGATTCGTTTTGCTTTTGCTTTTACACTCACCGGCCAGCATATTAGTATTAATAAAT…
ASTF_00008461	XLOC_004594	1676	273	0.599	-0.242492	0.0117942	1	0	0	TCGGTGATGGGAAAATTTGATTTGCAGCGAGAAGTTGCGAGCTGCTAGGATACGAAAGATATGGCAGAAAATTGTCACTGACTAAACAAATTAAAATCACTCGGTCGCTCTCTTGCACTGCATTTGGAGGGTTTTGGAGGAAAACTTTTCCCCGCCCGAACGATTCTTGTGAGTTAATTGTGTGTCCATTGTCGTTTGACATAAGGTTGCAGTGTGCTATTCTAACCACAAATAACTGCCCAAGTCCAACCATGCTGATTCCTGGCAAACATGATGAAAACCTCAATTTGCATCTTAATACTGCAATTGCACCGCATGTCCACTCCGCTTGTGTTTTTTGTCCTAGCCCACCAACAAAATGGGGTGACTGTGAGCGGTGGTGGCATTTGCGGACCTGGC…
ASTF_00008462	XLOC_004595	1012	231	0.6032	-0.000106951	0.0349973	1	0	0	ATACTTTACCTAAAACAGCGTACAAATCTTGATCTAAACTTCATACAATTCACGCTCCTCGCACAGCTTACTCTCTATCGGCACGTAGGGGTAGTTTTGAACAATAATATAGCAATGTATTGTACACGGGCTATACTCCTCTACTATATACAATCACCTCGTACCTCGGGCGTCTTTCTTTCCCTTCCTAAGACACCTGAAAATCGATGACACTTTTGACACTTTTGCTCAATACTTTAAAACAGCTTAAAACATATTCATAACACCATTACAGCGTTACAGCAGTTTTTTTTGTCTGCACGGAAATTATACGACGATAACGATTCGGTTCGGAAAACGATAATTGGTGGTGAAATGGGATGTCGGTTGGCATGTCGAGCATGTGAAATCTGTTCCGCA…
ASTF_00008463	XLOC_004596	413	288	0.4582	-0.606123	0.0203825	1	0	0	TATAAGGTTCTCACAACGCTCATCTTTCCCTGGAGATGCCTTGCAATGGGGGGTTTTTCTTTCTTTTTTTTTTGGCACGAGAGATCGTGGCACGCGTTCCCTGTCCTGTCTGGTGGATCAATAAATATCCTCATCCTATAACGTACATACGGAGGCTGCATCCGATAGCAAATAAATATGGCTTATATTACACGCTCGATACAGACACATACACTTTGTTTCTTCTCGGATGTTTTCGTTGTTGCTTTTCTCTGTCTGTTGGTTCTCTGTTTGTAATAGTGTCTGCTACATCTCCGCTTCATCGTGCATTTTATGTGTTTTAATGATACTGAGAGCAAACAATAAGGGTTCGCAACCGTTTTTTTTCTTCTGTTGGGTGGGATGGTTTGGAGGATGGGA…
ASTF_00008464	XLOC_004597	784	183	0.7516	-0.365215	0.0207523	1	0	0	CCTTGAAGCTCACCTCGGGACCGAGCTCCGTACCGATGTTTTTTGTTTGCCCCGATTGTCCAAGTCCATTTCCTGGGGAAAACTTTACTTAAAAATTGTTTACTTAAGATTCGACATGAACAATATTTATCATCATCAGCACACACACACAGAGGCACTCCAAACAAAACAAAAAAATGGCAACGTCCATCTTGTCCGGAATTAAATTTACAATGTGGTGCTGGGTTGTACAATTCCCTAAAGTGATCTCGGACTGCTTTTTTCACCCTCTTGTTTGGTGTGTTGTGTTTCCACAAGACGTTGGTCAAGTGAAATGTAAATTAACGGGCAGGCTGGTGCCGGTACCTCTGGTACGGTGAACCCGGAGCATCCTTAATTAACTCCGGCCGCAATTCGAGC…
ASTF_00008467	XLOC_004600	1255	180	0.7919	-0.407145	0.0110384	1	0	0	GAGGTCACAAGACACATCTTTTAACCAGCATGTTTTGGAGTAAGTTTGGGGGACAAAACAAGGTAGTGGGAAAAATAACTAAAACATTTTGTTTCCTGCCACAGAACAGTAGTTCCGTTTTTAAAAACGCAAGATTAATGAAGTATTATTATTGGACGTGCTACCGCAAAGCTGGATAATTATCGGTTTGCGTGTCACAGCGTCAACAGCACGACACTTCAACCAAACCAAACCAAACTTTTCCGTTCCCGTAAAACGTAAATAAACAACACTCCGAACACTGGGCACGGATGGCGTGCAGGACGGTCAAAAAAACCCTCTGTTCAAATAGATACTAACAAACGAAAACGGCTTGAACAAAGAAAAGGGTGAAAAAACAAAAAACAAAAATACCAAAGG…
ASTF_00008468	XLOC_004601	377	159	0.6095	0.10713	0.056065	1	0	0	TATCTTTTATGACCACGGGTAATGCATCGTGCATCCGTGGTTCAGATGCGTATGCCTATTTTCCTATTGCTTATTGCCTGCGCGTCGTTTGTTTATTCATCAAGTTGGTCTGTCCTTCACTGCCCTACGACCGTGCCTTGATCTTCGCGCAGGTCCTTTTTTCGTGAAACTAATCGCGCAACGATAACGAATGCGTTGGGTTCTAGCGTTAACCTTTTTCGGCCTATGTTCTTCACTTTCGTATTTTATTACATGGCCTGAGTTTACGATTACCATATGTCGAGATTTGTCCCTTTTTCGAGATATTTCCAATAACGCATCATAATCTTGTCGCTCTGTTAGTTTAGGGTTTTTTCCTAAAATAATATTTGCCGGTG
ASTF_00008469	XLOC_004602	408	0	0	0	0.00174795	1	0	0	TCGTCCCCGAACCACCGTGTGTAAAGTGTTGGTTTCCCCGGCACACCGCCGTAGGAGAGTGAAACAAAGTGGAAAATTGGCCGGTGCCAAATTAATAGCAACGGCAACAGTTTACATACGGTCGTAAAGTGAACAGTAACCGCACAAAAACCGCAACCAGAATCTCGCCGCTGCGCCGGAACCCTCGCCATTCATTGATCGAGAAGCAATCGAAAATCCATTCCATCAAAGGCTGCTGGGTCGGCAAGTGCGCGAAAGAGAAACAGGAAACGGATCCGAAAGACGCGCACGTGAAAGAGTTGGCCGACGACGACATTCTTCGCTATAAATCGTACCTCCCGCGAGACATACACAGATATCCCAACCACTTTGCCTTCACCCAACCCAGCTACCCTTATT…
ASTF_00008487	XLOC_004609	1266	207	0.8836	0.378793	0.105602	2	0	0	AGATTTTTATTTTCATTTATTTATAGAGGCTTTGAGTCTTAAAGACTTCATTCGCCTCTTTGGACTTTGGACTAAGGACTATTACAAGTGTGGCTCATAAAAAATAAACAAATTTCTCTATAAAGGTTGCTGATGTGCGGTTTTGTTGATGTTTGTCGGGTGAGAGAATGGTGGCTAGGTCGCTATCTAGTTGGCAGGTGTTTCGGTGTATAGTGTAACCATTTCAATCGGTGAGAATGTGGCGGATCGTGACGTAGATTGCAAGGAGCAGCCATTTGCACTGTTAGGACTGTGTTCGTTATCAGTCGTTTAGCATCCACACAGCATCGTGTCCATGAAGATGGTATCCGGGGAGGGAGCAGCCAGCACGACAACACTGGACAAGCTGACCAGCAGCAG…
ASTF_00008498	XLOC_004614	883	375	0.6856	0.0621656	0.186101	2	0	0	AGCAGCAGAAAAAAGGGGAAACCGTGATTCACGATTGGTTGGTTCTCGGAATCGCTTACTGAGACATTCCGATGCTGCATAGAACATCACTGCGATTAAGTATAGAAAACCCAATTTATGCATTTGAAAAACGCACAATCTCACGCAGTGAACGCATGTATGTTCAACCGATCATTTGAACTGCGCGAAAGATTTCATTGAAACATTTCACTCCCCAACGCGTTACTTTTCGCGTAACGCGTTACCTCCTAAAAGCTCTCGGGCGCATTCTTCCGTTATGCCCTTCAAGCGTATTGGTAATCGTAAACGAGCGTGAAGCGTGGAACAACAAGCATCCAATTTGTTTAGCTCAGATGGAATAACAACCTCGTCACGGTTTTTGCTCCTCTCCCTGCTTCC…
ASTF_00008526	XLOC_004624	1139	333	1.1599	0.0376652	0.303167	4	0	0	CAATCCTCACAACCCCGGACCCACCGTACATGGCACATGGTCGGAAGGAAACGTCAATGTCATATGGTTTCTGTTATTGTCGTTTGCACAGTACGCGGCCGGGATCGGGTGCAAGAAAGTGTCGCTTTTCCGCGGGAGTTGGGAAAACTCCGAACTCGCTGCGAACCGTGCGCCAATCCATCAACCAATCAACGGAACCTCACCAAACGGGATGCACCAAACAACCGTGACGGCGTGCAATTGCAAGTGAGCGATGCAGTGTTACTACGAGGAGCAGCTAAAGCGCGAACCGGAGAAGTCGCCGATAGACGAGACGACCGAGCTGAAGGGGAAGTGGAGCTGAGATTGAATCCTGCGAGCCGAGATTGAAGCCTGCGAGATTGAATTCCTTACGCTTTG…
ASTF_00008535	XLOC_004631	372	33	0.5849	-0.356962	0.00604027	1	0	0	GGCCGTGAGCAAAGTGTGAGTGGTGTGATCGAAGGTAGTTGGTAGTAGACGGTACGGCGAAGTAAGGAACAGGTGCAAAACTGTGCACAGTAATTTCTAGACTCACTAGGAAACGCTTCAATAGCAAACACATCCACACGCACACATACAGACACAAGAATACACCTTCAGCTATACACAGGCTCGGGAAACGCAACGTAGCGTGCGTCGAGCAGCAGTTTCGGATAAAAACGGGTAAAAATTGTGTCTCCAGCGCCAGCCTGAATGAGAGTGGTTGAGAGAGAGCGAGAGGGATAGTGCACTCTCGCTTTCGCCTTCCCTATTAGTCTTACACCAACGCTTGGACACGTACGGTCATTGGCCTGTCCGCAC
ASTF_00008585	XLOC_004654	597	204	0.6145	-0.447229	0.0176344	1	0	0	TTGCAACACACCACCTCGCCCTACTGTAGGTGGCCTGTGACTTAAGGCTGTGCTACGTGGATGCCCCCAAAAAACGTATCCGTCCGTGTTTTGCTATCATCCTCTTAAAACATTGCCCTCATGTCTTTCTGCAGCAAGACGGCAAAAAAGCGCAAAGCCGTGCGGCCGGTATTGTGGTGAAACATCAGACCCACACGCATACAGTGCGAGCCTGTTTTCTCTGTACAGTGTAGCGAACGTCTACAGCTAGTCCTGTGTGTACTGTATAATGATCCGTATGTATGTTTGTGTGCGTGTGTTGTACGTTGGATGAGTGAGCGCGTCTAGTGTAGTATAGGATGGGAAATAATTTGATAGAAAGTCTGTGTGCCCCTAGACTTTTTATGCAAACGTATTTTC…
ASTF_00008586	XLOC_004655	596	57	0.9234	-0.164415	0.0235367	1	0	0	GTGTGCGAAACGAATTGGACTTTATCCGGGCGAACCGATGCCGGTTTTTGTACTTGTTGAGTTGTGGTGTGATCGGAATTCGGCCCAGGAGTGAGTAACTTCCATCCAATCGGCAAAGCTAAATACAAACTAGATATCGAAAAACAAAACGTTTATCACTCCTTAGCGGAACTTCTTCGCACTGGATCGGTTTGCTTAGTTGTTAGCAATCCTCATCCCGCTCACCGAATTGGCTTACCACTTACTGTCTCCCATCCCAGGTCTTCTCCAATATTGGCATTGTAACGATTAGGCTTCGATTGGCATAGAAAATCAACCTGCTTTGAGTTCGTGTTAGCCTCCCGTGTTTAAGTTTTTCCTCTCCCAGCACACTGCCACCCGTCCCGTCTGTTTTAACCA…
ASTF_00008587	XLOC_004656	517	147	0.4494	-0.562489	0.00558146	1	0	0	GCGCCCAGGTGACAGTGCGTACATCAACGTTCTTCCCGTTAGCTCGCATTAGGCGAGTCGGTAGTCAGTTTTACTCATACTTCATAAACCCTGCCCTGCTTGGGCCTCTACGTTCCTAGTCCTCCCACTCTCACTCTCTCTCTTTCTGAGTGTGCGTGGATATATTTTTTTTCTGCCCCATCGGTGTGCCTTCACTGTGTCTGAGTGTCTTAGAGTGTGTCATATAACATATAACCGAACCAAATAAGAAAAAAAAACCCACAAACTCGCTTTCCCTGATTTTGTTTCGGTTCTTGGTTTGGACTTTACTTAACATCACTCGTTCCTACTCGCTCCCAACCCATGCTATGGTCCAACACATATTTTTGCCCAAATGGCCTAAATATAATACTGATAAAT…
ASTF_00008588	XLOC_004657	288	261	0.3907	-0.543109	0.0180722	1	0	0	AATATAAAAACTTACCTTTCTACTAGATGCGATTGATTGGTGAATTTGGATGGGAAATGACTTCCTTTTGCACACACATTTTCCTACACACAAACCACAACAACTTTGCACGAGATATACATGTATCTTACCTATTGCGATGTTCCATAGCTATAGTCCACACTATCCAATTTTTACTAACTCTTATCCCCGAAAATATTTCCCTCGGGTCTTGGAAAACGTCACATGTACCTTTTTCTAGTAGAGTGTATGCGTATGTATGTTTGCAGCAGAGTAGTGGTTTCGATT
ASTF_00008589	XLOC_004658	1384	156	0.9391	-0.122305	0.0225959	1	0	0	GGGTTCGAGTTTTTTCTCCCTCTCTCTCAGTAAACCACAGGACTGATAAGTGTGTGTGAGTGTGAGTGATCGTGCGAGATCGTGTGTTTGAGCGTGTGTGAGTGTACAGAATCTGTACTGCATGTACATATAGAAGAGTTAAGGACCGTTGAGACTTACAGGCTGGGTTTGTTTATCATCGACCTGTCACTTTGACTTTGTTGTGGTATTGCTATCCCTCTCGCTCTTGCGTACGCGTCTTAGTGACTTCGTTTCATCCTCGGATTTCAGGATTGCTTTCGATTATCCGTGCCCGTAATAGCGAGTCCTCCGTGTCATGTCCCGCAAACTCCGCCGAACGTCTCTCCCTCTTCCCCTTTACTCCCCCTCCACTCTCTCTGCACACTCGCATTCTTACTC…
ASTF_00008590	XLOC_004659	313	66	1.0991	-0.551172	0.0252345	1	0	0	CGTACACCAACACAATCCAAAGCAAGCACTTCACAACACACCACCACCCAAAATGTTCTAAAACCCCGCTAAACTAACTGCTGTATGTGTGTTCCGAAGCTTACCGATACTACAGATTATGTGTGTTTGATGTGTGTTGTTTCACTGTAGTAAGTGTAGTTTGAACTCATAATCGGAATAGTCCACTTTTGCGCAACAACAACACTTTTTCGTAGACGTTTTCCTACACATTAAACCAAACCAGTAATAGCAAACGAAGGCTAGCAAGGAAAGAGAAGCGAAAGCATCGAGATGGATGAAGGCTTGCTTAGCT
ASTF_00008591	XLOC_004660	112	105	0.6995	-0.318627	0.0245513	1	0	0	TAGTTAAATGGAGGGATTAAGGGAACGTATAACTTCATTGAAATATTCTGATGAGCATTTGCAAGCTTTCACAGACTTTGACCTTAGAGTCCTGGTAGAGAAAAGGAAAGCT
ASTF_00008592	XLOC_004661	2460	348	0.8208	-0.569705	0.00713961	1	0	0	GGGTTCTCTGGTTTGGGGGACATTCTGGTGATTGTTCGCCAGACTTCACAGACTTTCTTCTAGAGTCTTGATAAAAACTCCAAGACATGGAGAGATAGAGTTGGGGAGGCGAAGAGCAAGTCCTTTAAATTGTCAGTGCACGATTGGTATGGAATTTGCCAGAAAGGATATTGAGGGTATACTTCAAACTCCCTAACACACACACACACACACACACACACATACACACAAGCACATATTCACATGCAAGTAACAGTGGTGAGATACTGGAAGTCAACGTTTTCTAAATGCAATGGGTCCAAATGCATCGAGAGGTGATGGAACACACACAGGAACGATAAGCAGCGATTAACAACATGCTCGGAGCGCGTTGCCGAAGCGAACGAGAGACAAACGACA…
ASTF_00008593	XLOC_004662	2724	285	0.8081	-0.623195	0.00244069	1	0	0	ATTTTAATGAGCTTTTCGCGAGCGGATTGTCTCGGTGCTCAGATCGTCTGCACTAGCAATCAGACTGAACCACGATACAGCGATATTAGCAAGAGTAATGGTTTGCCAAAAGGAAAATGCAGCAGGAAGAAAATCTCGCAAACGAGAAGACATACAATTTGATCAGTTATTCATCTCAGACCACATCTCTCGAACTTTCCACGCTCAAACAACACAGGAATGGGTTAAATGGATACTGACAGAACTATTTAAACACACACACACACACACACACATACACACATTAGCAAAGTATGAACGTTTTTTGAATGTAATAGAACAAAAAAAACATACTCTCCACATAAACACACTCACACACGCACGCAACGATACAATTGCATAGAAAAATGTATCTGTCGA…
ASTF_00008661	XLOC_004695	1265	162	0.6925	-0.745133	0.0031245	1	0	0	TCGTCCTGCCTCTGGGAATTGATGCATTTCCTTTCGTGTTTTTTTTCCCTAACTTGGCTTACTCATTTACACACGACCAATACACATACCTACACATGTACACTGTATTTTACTGCTGTATTAGCTCTACACTGCTGCCTCACGTCTGTTGGGTGGATGCCATATTTGCCATTTTAGTTCGTTCTTCTCCATCAAACAAAAAATTCTACTCTTGCTTGCACCTAACCTCAATACTGTGACCTTCTACTTACTAACCGGTTTGAATGAAAATTCAAACATTTTTCCACCGTTGTTAATTTCCCATTTTTTTTAAAATTTGTATGCCTAAGCGCCACCTCGGGTGGGAGATCCCCCTCTCCAACCAAGAAAAGGTGCCAAGGACGAGCAGAGAAGTGTTTT…
ASTF_00008698	XLOC_004715	354	45	1.1262	0.054251	0.0846588	1	0	0	CCCAGCCAGCCAGCTTATGAGCTTATTATTCTCAATTTTGACCATTTTTTTTATTGCACAACACCACGTGTCCAATGGTGTGCGATGGGAAAAGATCGAGGTTTAAAATGTATGTAATCTTAATCAAGCAAATAAGCAAAAAAGAAGGAGTCGCGCTCTTAGGTAAAGAGATGGGATGTGTTTTTAAAAAAATATATAGAAAATAAAGTTGATCGTATAAAACAAAATGCTAGCAAAAAACAAAAGAAAACAAACTATTGGAGAAAAACAAAAGATTAAACGTGTAAATGAACCTTGCTTGGAGAGAAAACAAAAAGAGAAACCCAAAGCAAAACAAAACAAGTGAAGTGTATA
ASTF_00008699	XLOC_004716	2469	306	0.5393	-0.662284	0.00169325	1	0	0	TATAGAGAGCATATAGAATTTAATTTTTTAATCTGTATTTTCTCTTCCTAAAATACTTAGTTTAAATATATATTGCCAACAGTCGATCGCCACCAAGAGGGAAGAAGGTGGCGGGCTGATGAACGAAACCGTGCGCATCTCGATTCACACATTCACGAACTACCAGTACCACACACGTACACACCGATCGGTGAGAACATCGAATCCCAGGCAAGCAGCGGCACACTGGGAGGATTTGTTTTTAAGATGTAAAGTTAGCTTATTCATTTCTTTATTTCTTTGTTTGTTAATTTCGAAGTTCGATACTCGGAGAGATGCGTTTTTGTTGTATCCTCGACACTTTCCATCCATCCAGTGATATTCCATCTTGTAGAAATACTCACATACACACGCGTACCA…
ASTF_00008706	XLOC_004720	1226	219	0.7089	-0.108511	0.0252723	2	0	0	CCGTGACGGGTAACAAAACGGTGCGTGTGTGCAACTCGTCGTGTTCGTGTTTTTCAATGCATTTTCCCTGTAGACGAGAACGAGTCGTACCGTCGTTGGTACGCATTGTGCGTGCGTGACCGAAAACGTAGTGATAGCGGGTAGTCCGGCGACGATAATTGCCATCCAGCGGCGACAACACCGGTAGCCGGTTCAAGAAGGATTATTAGTGTGGGAATTCGACGATATCTCCATCCTGCAGCTGGCGGAAAGAAGTCCCAATATTCTGCCATACAACGCGCAAGAGGTCCGCGAACAATTCGGCCCGCTCAAGAACGCTCGCTCTAGCCCAGCACCGGAGGCGTGTAGAGGTACTGCCGGTTGGGAGGCGCGTGCGCATACTAACTTACCATCCCCACA…
ASTF_00008740	XLOC_004737	870	219	0.7601	-0.0930255	0.0482422	1	0	0	TTAGCAGGCTTGTGGCTAAACGTACGTCCGGATCGAATAATTGAACGCAATTCGGCACTGTCTAGCGAACCACATTTCTAAGCCCCAACACTTGACCAGTTTCCATTAAATCCGATTTGGAATTGACATGGTGACTCGGACTCATGTTCCCTCAAAATCACAATCCCCGACTATAGAGTTCTGGAAGGCTGTCGCGACAGCTGAGGTCACCATGTCCTGTTCCTTTCTATTTTAAACTATTTTCACTTAAATTTGTTTCCAACCTTCTGGTTCGGTTCTGTTACTTAGAAAAACTTTTCAGTTTCTAAAGCAAAGCCTGCCTCACACTAGCAAGTGAACAGATAGGAGCAAAAGCAATCGAATCGTCCCCAGTTCGACGATATACACCCCCGCAAGTGC…
ASTF_00008741	XLOC_004738	688	99	0.7801	0.0153361	0.0298538	1	0	0	CCTGCAACAACTCACCAACCACCAGCTTCCTTCGATCAACCAATCTACTCCTGCCTTAGACTGGGAACTAAAACACACACTCACCGGGGAACTGTTGGATCCATTCCAACCACGACAACCGCGCCATCAAACTTCCTAACCACACATCTATCATCCGACTTGCCGCCGACGAAGTACTTCGGACCGACATTCCGAACGTCATCTTCACCGACAATGCCAGATCGCCCCTCGAAACACGGCCTCTCCTAAAGATCCGCCACATCCAGCTCCTTGACGACATAACCTCAACACCTGCAATAGTTTTCCTGTTGGATTACGATGTCATTCCGCAAAGCTGATCGACTGGCTAACGAAGGTCGGCTCCGTCATTCACACACTATCACCGGGGAACCGAAAAAG…
ASTF_00008742	XLOC_004739	869	156	0.793	-0.445385	0.0137397	1	0	0	TTTTTACTAATTTTCCTCGTTTTAAGTTTCACCTTCCAGAGTGCGGTGCGCGAAGAAGGAGATAAATTTTTGAGAATTTTGCTTTTCAATTTAATTTTTTGTTGTTTGTTTTCTTTTTCCGAATGTGCTTGCCTTTAGCCCGATAGTATAGCCTGGTCGTTTGATGCACGGTCGAATAGCTCTTTTGTTTTGGCTCGCTTTTACTTAATTATTTAACTCGTAGTAGCAGGATGTCAATGAAGTAAATTTTGGACGTTCGAATTTCAGTGTATGTGTCTATGTGTGTGTCTGTGTTTTACCTTAATTTTTCCTTCCTACCACATATACATGCCAATTGCGGGACCGATCAGTTCGTTAAAGTAAAAGAGCTTCAAATTAAATGAAACCGATTATGAGCTT…
ASTF_00008743	XLOC_004740	3740	348	0.6147	-0.962718	0.000271929	1	0	0	TAAGAAATTAAACAAAAAACATAAAACAAACCAAACATACAAATACAAACACAGAAACTGAAGGAAGAAACAAAACAGTGCTGAAAAGGAAAACAATTAAACATACAAAACAAAAACAAAACCAAAACCCCCTATCGTTTAAATTTTCTTTATTTCATTTACTCGTCGCACTTAACGCACTAATTGTAGTTCAGCGCGCGCGTAACGTCGCTGTGTTACTTGGCGCCAAACAAACCAAAAACTGTCTGCTGTTTTTGTAATTGTCGCTTTATCCTCTCTCTTTCTTTCTCTCTCTCTGCTCTGCTTTATATTATTAATAGGTTTTAGCACTTCCCACAGGCTCTCGTTTCTCGTTTTTGTTTTCTTTTTTTTCTCCCCGTGTTTTTCGCTTATCTTACC…
ASTF_00008744	XLOC_004741	3605	420	0.6977	-0.90822	0.000898789	1	0	0	ATTACTGTACTGGGGAGAGAAGAACTAGGCAACGTCACTTGCTTTCTCTCTTTTCTCTACTGCCAAATCCTAGAATATCACCCATCTAGTGTTCATCGATATGTGGATCTAAAGATGGTCTCTAAAGAGTTAAAATAGTAGTACCAGCTAGTAACAAATCCTCCTTAGAACATTACTCCTTCTCTCTCTCGCACAAGCTCTCGCTACCTTCTCCATTTAGCTCTACATTAGCCTCTCTCGCTCTCGCTGTATTGGGTGTGTCTCGCTTTAATTGTGTCAGGCGACTATTTGATAAATTCAGGCTCTATCGTATTATCCTCAATCTTCGAACTCTGCTATGTAACTAGAGCGGTTGATGTGTGAGTGCAACTGGCAGGTGTATTTGAATGTACTGTGTCT…
ASTF_00008745	XLOC_004742	327	123	0.7231	-0.470315	0.0162741	1	0	0	TATATGTACGTGTTTGTTATCATCACTATCGCCCTCCGCTGCTGTCGCTTTTCTGCCAGCTTTCCGGGGTTTGTATGTGTGTGTGTGTGTCTGTTTGTATGTGTGCAAAAGGCGGGATACATATAACTCTATAAATTCTCGTTTTGTCGCTTTCTCGCATTAATTATGTATATGTAACTTAAACACACACACACACCAACACTCTCTTAATGCCTTTGTTGTGTGCTGTGATGCTCAGAAAGATGATTTTGGTTCGCTCTTAAAATGTCTTACATTGACGGTGACGATTTTTCTGTTCTTTTCGGCGTGTATGTGTGTGTCTAATAT
ASTF_00008746	XLOC_004743	2043	255	0.8572	-0.362608	0.00999929	1	0	0	GTCTGTTTCAATTTTCGACGCTCGCAGAGATGCTTCGCTTTGTAACAAACACAATTGGTAAACACATACACGGAAAGAGTACCTTAAAACCTAACAGGAGAGGGAAGAGATATTTGGGAGATGGGGAGAGGAAGGAGTGGGGTTGTGTGTGCAAGTGTATGAAGATTTCAAGCTTAATCTTGCATAGCCACAATCTTCCTAAAGAAAACTGTTTTACCCATCCCCCCTCCCCCCCTCACAAAAAGCAAAACAGGAAAGAAAAGAGGGAGCAGAAGGAAAACTAAAAGAAGAAAGCAAACGTAAATCTAAATAAATCGAAACTTCGCACGCGTTAAAAGTGGAGGAGGAGTGCAGCATGGCATCAATTTTGCGCGTGAGCGTTTTTTCCATGATGGGCGG…
ASTF_00008748	XLOC_004745	2101	522	0.3991	-0.341401	0.025777	1	0	0	TTTCGTTTAGTGTGTGTAAATGTGTTTTTTCCCCGCCCCATTTCCTTCCTATAAGTCCGTGTGTCTGTGTGTTGTATCTTCTTTTAAAGCAAACGAATTGTTTCAGTTTTACTCACGTGGCTCGTCACGAGGCTAGACGAGTATATGCAGCTGCTAACAACACGAGCTTACTCCTTCTAGCAGTGGAGAGTGCTGTATACGATTAATTTATGGCAAGAATTTGATAACAAAAAATTCCAACATAAAAACGCTCTTCCTACTATGTTGAACCTAAGGGAGCTACTATAAACGTAAACGCTAGGAGTAATAATCTTGACGGTCCTTTAAGAGCGAATGGCAAGAGCTATTGCTGCCGTTTGGTTGTGTTAGAAAAATATGTTTTGTATATCTTTTCGTTAC…
ASTF_00008749	XLOC_004746	454	282	0.919	-0.675545	0.0591151	1	0	0	TTCCCCCGGGGAAAAAAATCCACCCAGAACAGAATAATACTAAAGCGAAAAACAATAACGCCGCCATATTGGACGCGCGCGCCATTTTATCGACATCCAATTTTGCAATCAAGCCTTTATAAATGCGCAACTCAACTGTGCGTACATGTATGCCTGATTTATGTGTGTGTGTGTGTGCGTGTTTTTTTATCCCATCTCTTTGTATACACACAAATACTATGCTGCTTTTTATCCTTGCTCTCTCTCTCTTGAAATGGCCCCAAATGTATCCCGAACAATTAAATACATCACCATCCTCCATCTTGCTTTTTTTTTTTTTGAATCCTATGCGGTGTGTGTCCGTTTTCTTCGTTTGCAGTCAGTCGTTTTAGTGGTACTTCTTCTTCTCCCATTCTTCCC…
ASTF_00008752	XLOC_004749	628	141	0.4679	-0.406468	0.00695773	1	0	0	GACGTCCTCCGAATGCTCTTAAGCGATAAGGACTTTATAAGTATCTGGAGACGGTAGAGTTCCTCGTATCCAGATATTTGTACGAAAGTTGCTATACTGCTCCGGATCGTATCAGCGTCCCAATATCTTGAAGAACTTGAATAGACACTCCGGTTAAAATTGTCGATTCTTCCTGGCCCAGTAATCGTACTCGGTTTCGTTCGGTGTTCAACGAAGCCCTTTCTTTGTCTTCCAACAGGAGCCACCTCAATTAACCATAAAACGTTGATGCACGCACCATAAACATTATATTTAAATAGAAAACTCTGAACGTGGTTTCGTGGCACAATCCTTCGGCAAACAATGGCTCTTTGTTGAGCTTGCGGATCGGGCGGCAATAAAATGTGCTACCGTGTATGC…
ASTF_00008753	XLOC_004750	729	102	0.9186	-0.428769	0.0155624	1	0	0	GGGCTTTACGCAACATTTTTCGGAGTCATACGGTTGTATGAGAAATAATAAGACACATAGACCTAGTGGAGCCCCCTCTTATCCAGGATATTTTTGGCCAGTTCCTGTTGATCATTGGAAGGTTCTTGTGGAAGAATAATACATCTCACTGGGTGATAGCCACCTGGCTTCATCTTCACTGGATGGCTTCAAACAGGCTATCCTCTCTAATAAATCAGCTAGTCAACCTATCATTATCTTAAGACTTTTAGAAAAAATATTCTAGAAATATAGGAGCAAGGGCCTTTATTATTCGTTCTTGTTAGAACACCGAGAAGGGTCTGTCTTTACCATTTCTAGCTTGATCTGTACGTAGCTGTCAGAGTTCTGGACAAGATCCGGATTAGGTATTTGTGAGTC…
ASTF_00008754	XLOC_004751	1099	141	0.5132	-0.71905	0.0020226	1	0	0	GCAGGGGTGTTTTAAACTTTTTTTTTCTATTTTGTAAATCTTTTTACAGCTTTACCTGAAAATACGCTTTTTGAAACGTTGAGAGGCAGAGAAAAGGGGTGTGAATCAAACGAGATGGAAAATTCCACGCTTTCTCCATTTAAGAAACTTCTCATACTTCCCTTGAAAACTTTACTCGTGCCGGCTACGGCCTTAGAATGAGCAAGAATAGAGAGAGAGAGAAATGAGAGTGATTCAAGAGTGAAATGAGAGAGAATCGAGAGAAAAATGAGAGAGAAGTAAGAGAGAGGGGAAAAAAGATAAATGAAAAAGAATCGAGAGAGAAATAAGAGAGAAAAGAGAGAGAATGATGAAAGAATAAAAATGAATCGAGAAAGAACTGAACGAGAAGCGAGAAGA…
ASTF_00008755	XLOC_004752	818	144	0.5669	-0.802141	0.00292478	1	0	0	CACAACCCAACCCAGATTAAAAAAGGGGCCGTCCTGGGGCAGGTTTAGAGAAGGGTTTGGTTTTATATTTCCCCGGCCAGTATAATAAACAAAATAAATGATTTCCGAAACAGATTCCACCCAGTCTCGCCCACCAACCCTTCTCTTGTGTTCTACTTTTCTCCACCGCCGAAGTCCTAATTGATCGGTGTTGGTTCAATATGCAATACCCCATCAATCAGCTCTAATCACGTGCGCAAAACGCATTTAACTGAAGCTGACATATGATTTCATTATCCCCGCACCTTTTCTTCTCTCTCCCTTCAATCCCACCACCGTCCCCCCCGTTTTCCTCTAACATCCTTCAACAGGTTCTTATCAAGCGGATTACACATTCTGCAAAAGCTGGCTAGATTGGAA…
ASTF_00008756	XLOC_004753	284	96	0.7013	-0.632268	0.00873991	1	0	0	TATTTTATCCACCCTATTTCGACACAACCAACCAATCAACCACCAAGCATAAAAGTGTTGATATGAAGAGATAATGTTAGGCATTGAAGGAAACCAAAAGAGAGAGATAGAGAGAGAGAGAGCGCGAAGAAGAAAAAACAACCCACAAACAAACGAAACAATCGTGTAGGGGCGAAGTGGAAAAACAAAAACCTGTAAAAATTAATGACTAATAGTTGGTAAATACCGGTATAAAAAAGGGGCCAGCGTTACGTGGTCAGTTCCTTGGCTGAACAGCCGCGTAA
ASTF_00008757	XLOC_004754	499	93	1.0618	-0.586839	0.0205865	1	0	0	AAACGAAAAGCGCTGTTGACATTTGAAAAAAAACATAAAGCATAGAAAAACCCCCTGCCAAAAGCTCGTACCAAAGCAAGCAAATAAATGAACGTGTGCGAGTGATACGAGTGTGTGTTGTGAGAGAACGAGAGCGAAAGAGAGAGAGAAAGAGAGAGGGAACGAACAAGCCGTTCAACTAAATTAGTGTATGGGTGATATGGGTTCCGTAGGGTTAATACATACGAAGCCGAACGTCGGGCAATGGCGGAGTCACAAGTAATTATTCTAAACCAAATTCTAACACTTCAAACACAAGCCAAAACGAGCAAAACCAAAATACCCCTGTTTAGATAATCGTCAACACACCACACGGAACCATTTGAATGTTGTGTCAACGTTACAGTAAAAACCAAAACC…
ASTF_00008758	XLOC_004755	607	192	0.4818	-0.266261	0.0161732	1	0	0	AACCCTTAGTTGGAACCCGCGGACGACCGCGTACCATCATAAATTAACAGCAAACAATGAGCAAAAGCTTCCCAGGGCAAGAAAAACAGGGGGAAGGGAGAGGAGAGAGTGAAACTACCCCCGCTCTTAAACATTTACACCCCCCAACCCCTCCATTTCTATTCATCCCCTATCAACCTCCAACCCCTCCCAACAAGAACCGTTTGCACGTCATTTTCCCGGGGAGGAGTGGAGGTTTGGTCTGGTGACGACCGAGTTTAATCATCATAATTAAATGTTTACCACACGCAACAAAAGCCAACCCAACCCAACCCCCTTTTTACACCCCCTCATATTTAGCACCCTCAGTTTTTTTGAGAACCATTTTTACGCCACGTTCTCAACAACAAAAAAAGCTGG…
ASTF_00008759	XLOC_004756	762	192	0.5733	-0.343281	0.0143992	1	0	0	CGAATTCAAAATGGTGCTAATTCGAGTGGGCTTAGTGGCGAATCATGGATTGGAGGATTCTGTGAGAGAGAGAGAGCAACTCTCTTCCACTCAACCCTCATCTTCCCGATCCCCATTTTTCGAACACTGTTCCACTGACTGTTTCGATTCTCTCACTCGAAAAACCTCGTATACACACACACACACAAACGCACTACCTTGATAGGGGAAAGGGGTAGGATGGATCGTGATCCAGGAGGGGAAGGGAGAAGGGAAAAATCAACCCCATGTTAGCCCCACTAGCTGCACAACGGTTGAGCCCATCGTGTGTCCAACTAGTCTAGTGACCATTGTCGACCCTCAACCCTTCCCACTCATCCCTCCCTGTCTAAGTGAAACACACACACACATATACGAAGA…
ASTF_00008760	XLOC_004757	602	78	1.1032	-0.063557	0.0588921	1	0	0	ATTAAGTCACAAGTGAGTTGAAATAGCTCTTCGTGACGATTCGAATCATCTAATTCATTGCCAAGATTTAACTCATTCACTCATTTTGACTCAATTTGCACATCCCTTCGAATGACTGTTGACGGGGAATGATAAACGAAATTAGAGATTTTAATTTTAATCAGATTAAACTAGAACATAAAAGGGGTTTTGCTATCAAATAGCAATCAGTAGAAGACGGAAACACTCTACCTAATTAATTTAAAATTTATTTATTTATTAAATATTAACACAATCCTCACAGTAGAGTATTCGTTTTGAATTCCACTTTTTCCCGGTTTTTAAAAAAGACACCTTGTAATGTAAGTACTATTTTTCCCCTAACAAAAACCCCCCAAAAGGGACGAACTTATGTCCCAT…
ASTF_00008761	XLOC_004758	586	234	0.6347	-0.285081	0.035719	1	0	0	TGCCCAGTGTGCGTGGAGTTAGTAGTGAACCTTTTCCCTTTTGTGTATTGTATTTCTTCTTCTCCTATGTATCCTATTGTGTTCTATTGTGTATGCGCATGTTTGCTGTAACAAACAACGTCGAAATTCTGTCTGTTAACTGCCGTTTGATGATGCTGCTTCGCTTAATACACCGCGCGCAGCACCGTCTATTTCCCCCGATTGCCGATTTGTTCGCTTTTCCCATTCCGCCCGCTCATCCTAATACCACGTTCGGGGGGAGAGAAAGAGTAGAAGAAAAAATTGCTTTTCCATGTTGCTTTTTACCACAATCAGTGTATCAGTGAGTTTCGTTCTAACCCTTCCCTGGTCTCGCCCAAAAACATTTGCCTCTTACTCTGCCGTGACGGATGCTTAAAA…
ASTF_00008762	XLOC_004759	391	75	1.15	0.0475383	0.108122	1	0	0	TTATTGTTTTTAAGGACCAATCTCAACTCATCAGTCCAGGACGGATTCAATCACATTTACGTGGTTGTGAAATGCGCCGGAAGAACTGATCTGGAACTAACCTTATTCCGGTTATACTAGGACCACTCCCAAACTCCAAGTCGGTCAGATAATCAGATCTTTCAGGTCACTTCAATCACGAGAAAACTTTGGTCGGCCATTTACTGGCCACCTTTAAACTGAAGTCCTGACGCTATGTCCTGCATATCCGCGGATTCGATATTGGGACCACTCCGGCGACCGGCGCCATTGTCACCTCTACCAGCCTGAGGATTATTTCAGGCTTCTCGATGGTTCAAGGTATTAAGGTCACTTACCTAAATCGACTACATTTATGCAGGTATCGTCACAC
ASTF_00008763	XLOC_004760	1543	69	0.7334	-0.433562	0.00223098	1	0	0	GTCACGCCGTCAGGAACGAGGCGCGCTCTTCATTCGTTCGCACGCTAGCAGACGGTATATACCAGCCAACGACTTACCAACAAAAACGGAGACGTCTCAACTTGTCTGAACTCGCGTCGTACAGTCGGTTCGGTCGGTCCACCGATACACAGTTGTCACCGGTGTGTTTTTGTTTTAAATTTCCCGTCCTCAGTGTACGTGTGTGTGTGTGTGTTCCGTACGCATCATCATCATTATTTTGGCAAACGATCGTCCTCGTCCCGTCAGGACTGTTTTCAATCGTACGCGCGCGCGATCGGCCGGGACCAAGTGTGATCGAATTGTGTGACCGATTGCGTCGGTCAGACCAACCGAAAAACGGAAGAAAAATAAGCGTTTCTCCAATAAACAGAGAGCTGT…
ASTF_00008764	XLOC_004761	498	213	0.5087	-0.3572	0.0196447	1	0	0	TTTTGTAAATTTCCGTTTTTTCTCTCTCTCTCTCTCTCCCCCAAATATGTCCTTCCAATCCGGCTTCGATCAATCATCAGTGGTTCCTTCCTGTATTGGCAATGTAAAGCAACTAAATTTCATAACACAAAAAAAGGCAACAACAGATGTTGTTCGGACACGCACCGGAGAAGAGAGGTACCCAGGTTGGCTGATTTCTCTTTTTGAAAGAGAAAAAAAAGCAATCAAAATGCATGTGTGGGTGTGTGTGTGTTTGTAATTTATTTTTGGTTTTGATAGTAATTTCCGCGTCCGTTTCTGCATCCATATACATCCACGTTTCCTTGTAGCGCCACAGTAACGGCCATAATAACGCTCCGTAACGCTTTCACAAGAAGTTCGTCAAGGCTGTGGCAGTCT…
ASTF_00008786	XLOC_004779	1035	180	0.9577	-0.221257	0.0368839	1	0	0	AGTAAAGTAGTCCAGGTCCAGGTGGGATTTGAACCTCGGTCCTGCCGTGTGAAGTCCTGCTATACCTTGCTACGGGGATAAAATCAACTCACAGAAAGCCAGTAATGGCTTGCCGAGAGAGACCTTTCGAGGTTGTAGCGCCAACCTCCATCCCCTCTCACCCCCACCCCCCAACCCCTTATCCGGTTGCAGTGATTGAAGATAGTGAGCTTTTTAAGCGTTTAATTGTGTCTCAAAAGGACGTGTTTAAGCAATGTGTTTCGCTTGAAGAAAATGTGTGTTAGAAATTTGTAAGATACGGTAAAAAAAATGCTTTTTTTTACAGCACAACACACACAGCAATCGAAGCAATCGAAGCAAAACATACCCTCTCTTTCTCACTCACTCGTTCACTCTCTA…
ASTF_00008787	XLOC_004780	951	192	0.6535	-0.446496	0.0111426	2	0	0	ACATTTACGCAAATAATCGCAGCGGCAAACAACCGCACCACGAGCAGCCTTCAAAGTCAGCTGACAACTGTCAGTCGAAACGTCATGTGCCACACACGCATACACACACATTCAGAGGTTGTTTCTCTCTCTCGCAGTCTAAACAAACGCGGTGGTGCGGATTTTGTGCGGGTTTCGAGTATTATTCGCGTAAGTAATCGCGAGTTTCGGGTCGGTACGGTTCGGTTTCAAAAGTGTTCCGCGTTTTCCGTGTTTTTCGCGTGTTTTTCTGTGTAGTTAAGTGTCGAGTGCGATTTGGGCTCCGTAAAAATGCAATCCCGTCCAGTGGCGATGGTGGTGATGCAGTGAAGAATCACAGTGCACTACACATAGCTCAAAGCCTTCCGTCCTAAGATCTGC…
ASTF_00008812	XLOC_004793	939	222	0.9412	-0.194003	0.0603002	1	0	0	CATGGAACGGACAAACATTAGCATACACAAACAAAAACCATCCAAAGTCAGCTCCAATCAAACAAGTCGTATCGCCGACCGCCGACCGTTCCCTGCTCAAGACGAACTTTTCACAGTGTAGCAACAGAGAAGAAAAGCCGATGCGATTTTTGCGGATGCGTGCGGGGAAGCGTGGAAAAACGACGGTACACATTGGTATGGTAAGAACTTCAAGAACAGTTTTCCTTTTCATCCACACCAATAAACCGGGCCCGGTCTGCCGGAGACTGGCGAAGAAGCTTGGATAAATAAACAACGGCACGGCACGGCACATACACACACACACACACATGTACTTGGTTCGCGTGTTTTCCTAGCGGCCCCCGGGAGTCGAGTTTCCCTTTTCGCCGAAGGTTCCGA…
ASTF_00008820	XLOC_004795	410	69	0.7507	-0.433058	0.0107655	2	0	0	TGTGCGTTGGAAGGGATGACCAGTTGTGGAACAGGGCGCCATTTGTGTCATCATTACGTGAAGCCGTTCAATTTATTTATGTGATTCTTAGCTAGTTCTTCCCCGGTTTGTGTTTCTCTCTTCCTTCCAATTGCTAATTTTGCCCCTTCGAGAAATATTTCCGGTTGTGATGTAAAGCTTACACACATCTTGCCTATTCGGTGTCCGTGTTATGAACCGTTGCTTGCTAGGAACCGTACTGGAACCGATGATGACGACGACTCTATAGTGACGTGTTCGAACGGTTACAGAACAGAACAGCCTTCAGAGGGTAAACATCGGGATCAAACCGAGCGAGTGTATTGTTTGATTACGTGCGATGGCCAGTCACTCATGAGTTCATTTTCCAACAAACCGCGC…
ASTF_00008825	XLOC_004798	461	126	0.9698	-0.253068	0.0472401	1	0	0	CTGCAACAACTGCAACTGTACGGCCGCCTTTGTCCCGGAGGAGAACCTCTGCCTTTGCTACTGTCCCAATCCAGCAGAAAGTTAGTCTATATGGTGCTTGTTTCATTTTCTGTGAGCTGTTTCTATCTGCTTTGCTGTCTGTTCCACAGAATCACGCTGCTTCCAGTTCGTGCGTGAAACGAACAACATTCTGGGCATCGAGTATGACCTGAAGGTGCTGGATGCGGCCGCCACCCGTATCGTGATGCCAGTGCAGCGTACCAAGCGAGACACACCGAGGAAACGTCGGCTCGAAAGACGTAAGGAACGGATACAAAATCGACGCACTAACCGGAATGCTCGTAAACGACGGGTAAGGGTTGAGATATGATTTTGGACGTGTAGGAACACACTTCATTT…
ASTF_00008831	XLOC_004804	520	24	0.8785	-0.802239	0.00383832	1	0	0	GGCGAATAGACAAACCCGACCGGAAGCACCGGCAACACGTGCCGCAAAATACGCGTACGAAACAAACAAGGCGAGCGGGCCTATCTACTACGCGGTATGTCACACCAAACTTAACACGAACGTGACACGAATTTATGCTTAACACTGACTAGAGTAGCAAATCACTTTCACAATAAGCTTCTGATCACTTGTGGAATTTTGGAGTGCTCGATCACCAAAGAGTTATGCACCAACTTTGACACTGTAGCTTCGAGTTTTTTCGCGTCACCAAACCAAACTGTACGAACCGGGCGAACTGAAGCGGACTAATCAGTTTAAACTCTCCAGAGCTTGTGTCGTGTAGCGGACGGCGCGTGATACCCTCTCGGAGCCTCAAACCGGTGTGCGTTACGCTGCGAT…
ASTF_00008868	XLOC_004818	1573	180	0.994	-0.197493	0.0213755	1	0	0	TGATGATAAAGGCATACCGTGGCCTCCATCGAGAGGGTTTGATTTAAGTTTCTTTAAGCTCGTGTACCGGCCGGCGATAGTTGTAAGGTTTGATAGTAAACAGTTGGAAAACAATATTAACACGAAAGCAAAACACACAAAACAAACACATTTGCAAGCAGCATTATCTACATTTCTCACAATCAACAATCAACGGCGATCCAAACGCTCCAAGTTCTAATAGAAAAGGGTAACAACATAGAAGAAGAAAAACACCAGCATACAAGCAAACAAAACAAAGCAGAAACATAATAGGCATACTAATAAACTAGGAAAATCGGCAATCGTTGTTAGTGGAAAAAAAATGAGATCGCGCTGCTGCTTCTCCGGGAAGAAATAGAATCGGTTGAAAGACGACAG…
ASTF_00008912	XLOC_004837	232	96	0.7973	-0.22181	0.0322311	1	0	0	CTTGTGGTGGTTCGCAAATTAAGAAAATAAGTGCCCATTCTTAACCGCCGCTGCGAGAGCTCTGGTGCGAATGCGTGAGAGCGAGAGCTGGTACACATACTGTCAGTGCGAACGAAAGATCCGATGCGAAGAGGAGAAGCGAAAGAGGAGCCAAGAAAGCGAGCGAGAATTCCGCGGGCGAAATAGACCAACCGCGCCGCGTGGATTTGATGGTGTGTGCTGTGCAAGCGTA
[truncated: 2,240 more rows]

## Sheet: Sheet2
Supplemental Table S7.2 - A summary on expression information of designated non-coding RNAs with peptide evidence
[truncated: 39 more rows]
